# Supplementary material for: Identification and characterization of the powdery mildew resistance gene in spelt accession Lsy-93
Source: Research Square preprint supplement (doi:10.21203/rs.3.rs-6722793/v1), 2025-06-06
Supplement: Supplementary file 1 [file 2114a7247e68c9de4734d4c4.xlsx]

## Sheet: Sheet1
Table S5 Validation of diagnostic/closely linked markers L93-293, CIT02g-20 and L93-277 on 46 wheat cultivars/breeding lines for marker-assisted selection breeding
Genotypes	Region	L93-293	CIT02g-20	L93-277
Yannong 15	Shandong	-	-	+
Yannong 17	Shandong	-	-	-
Yannong 23	Shandong	-	+	-
Yannong 24	Shandong	-	+	-
Yannong 30	Shandong	-	-	+
Yannong 31	Shandong	+	-	-
Yannong 37	Shandong	+	+	-
Yannong 161	Shandong	-	-	-
Yannong 191	Shandong	-	-	-
Yannong 215	Shandong	-	-	+
Yannong 301	Shandong	-	-	+
Yannong 377	Shandong	-	-	-
Yannong 390	Shandong	-	-	-
Yannong 836	Shandong	-	-	-
Yannong 999	Shandong	-	+	-
Yannong 1212	Shandong	+	+	-
Yannong 2415	Shandong	-	-	-
Yannong 5158	Shandong	-	-	-
Saidemai 16	Henan	-	-	-
Shengmai 116	Shandong	-	-	-
Yunchengxiaomai	Shanxi	+	-	-
Tai 4123	Shanxi	-	-	-
Nongda 4538	Beijing	+	-	-
Zhengmai 16	Henan	-	-	-
Xiinmai 23	Henan	+	-	-
Shijiazhuang 8	Hebei	+	-	-
2017 jimai	Hebei	-	-	+
Shinong 086	Hebei	+	-	-
Taimai 101	Shanxi	+	+	-
Luomai 013	Shandong	-	-	-
Huaimai 16	Jiangsu	-	+	-
Zhongmai 895	Henan	-	+	-
Taishan 6039	Shandong	-	-	-
Xumai 1108	Jiangsu	-	-	-
Jimai 19	Shangdong	-	+	-
Xinmai 296	Shangxi	-	-	-
Zhongyu 008	Henan	+	-	-
Henong 974	Henan	-	-	-
Huaimai 23	Jiangsu	-	-	+
Xinong 219	Nation	+	-	-
Yumai 49	Henan	+	-	-
Chang 6878	Shanxi	-	-	-
Shannong 1490	Shandong	-	-	-
Shengmai 20	Shanxi	+	-	-
Kenong 199	Nation	-	-	-
Yumai 416	Henan	-	-	-
Note: "-" indicates that the markers did not amplify the polymorphic products linked to PmLsy-93 in corresponding cultivars/breeding lines, while "+" shows the opposite results
