# Supplementary material for: Identification and characterization of the powdery mildew resistance gene in spelt accession Lsy-93
Source: Research Square preprint supplement (doi:10.21203/rs.3.rs-6722793/v1), 2025-06-06
Supplement: Supplementary file 2 [file 3fb07fd32b65901c3c3eec4b.xlsx]

## Sheet: Sheet1
Table S1 SNPs between the resistant and susceptible bulks of Lsy-93 × Tainong 18 (TN18).
CHROM	Start	End	varBScore	wild.AF	mutant.AF	AFD(deltaSNP)	REF_FRQ	wild.DP	mutant.DP	POS	REF	ALT	Type	Feature	Impact	Transcript	Rank	Gene	Variant_DNA_Level	Variant_Protein_Level
1A	92395	74167295	161	1	0	-1	0.875	28	196	92396	TC	T	INDEL	upstream_gene_variant	MODIFIER	TraesCS1A03G0000500LC.1	-1	TraesCS1A03G0000500LC	c.-1788delC
1A	92395	74167295	161	1	0	-1	0.875	28	196	92396	TC	T	INDEL	upstream_gene_variant	MODIFIER	TraesCS1A03G0000600.1	-1	TraesCS1A03G0000600	c.-4007delC
1A	92395	74167295	161	1	0	-1	0.875	28	196	92396	TC	T	INDEL	upstream_gene_variant	MODIFIER	TraesCS1A03G0000700LC.1	-1	TraesCS1A03G0000700LC	c.-4007delC
1A	92395	74167295	161	1	0	-1	0.875	28	196	92396	TC	T	INDEL	downstream_gene_variant	MODIFIER	TraesCS1A03G0000400.1	-1	TraesCS1A03G0000400	c.*4250delC
1A	92395	74167295	161	1	0	-1	0.875	28	196	92396	TC	T	INDEL	intergenic_region	MODIFIER	TraesCS1A03G0000400-TraesCS1A03G0000500LC	-1	TraesCS1A03G0000400-TraesCS1A03G0000500LC	n.92397delC
1A	92395	74167295	161	0.967	0	-0.967	0.672	60	117	1187308	G	GTGGACGTCATGAAGCCCGGGGCTGTCGTGGAGGCGAGGAA	INDEL	splice_donor_variant&intron_variant	HIGH	TraesCS1A03G0004500.1	2	TraesCS1A03G0004500	c.193_193+1insTGGACGTCATGAAGCCCGGGGCTGTCGTGGAGGCGAGGAA
1A	92395	74167295	161	0.99	0	-0.99	0.395	105	67	8998422	AACCTGCAAGTAAGATGAAGCAAACACAAATGAGTACATTTAAACAGTGTTTCTAAAGTAAATATAAGAATGCACCAAAAGTTCAATTACAGTTCCAGGCGGATGGATATAACATAATATGTGAATCAATGGACATTAATCGCTGTGGTAAAGTTACACGC	A	INDEL	frameshift_variant&splice_acceptor_variant&splice_region_variant&intron_variant	HIGH	TraesCS1A03G0033900.3	11	TraesCS1A03G0033900	c.1923+3_1925del	p.Val642fs
1A	92395	74167295	161	0.99	0	-0.99	0.395	105	67	8998422	AACCTGCAAGTAAGATGAAGCAAACACAAATGAGTACATTTAAACAGTGTTTCTAAAGTAAATATAAGAATGCACCAAAAGTTCAATTACAGTTCCAGGCGGATGGATATAACATAATATGTGAATCAATGGACATTAATCGCTGTGGTAAAGTTACACGC	A	INDEL	frameshift_variant&splice_acceptor_variant&splice_region_variant&intron_variant	HIGH	TraesCS1A03G0033900.1	10	TraesCS1A03G0033900	c.1806+3_1808del	p.Val603fs
1A	92395	74167295	161	0.99	0	-0.99	0.395	105	67	8998422	AACCTGCAAGTAAGATGAAGCAAACACAAATGAGTACATTTAAACAGTGTTTCTAAAGTAAATATAAGAATGCACCAAAAGTTCAATTACAGTTCCAGGCGGATGGATATAACATAATATGTGAATCAATGGACATTAATCGCTGTGGTAAAGTTACACGC	A	INDEL	frameshift_variant&splice_acceptor_variant&splice_region_variant&intron_variant	HIGH	TraesCS1A03G0033900.2	10	TraesCS1A03G0033900	c.1695+3_1697del	p.Val566fs
1A	92395	74167295	161	0.99	0	-0.99	0.395	105	67	8998422	AACCTGCAAGTAAGATGAAGCAAACACAAATGAGTACATTTAAACAGTGTTTCTAAAGTAAATATAAGAATGCACCAAAAGTTCAATTACAGTTCCAGGCGGATGGATATAACATAATATGTGAATCAATGGACATTAATCGCTGTGGTAAAGTTACACGC	A	INDEL	frameshift_variant&splice_acceptor_variant&splice_region_variant&intron_variant	HIGH	TraesCS1A03G0033900.4	10	TraesCS1A03G0033900	c.1863+3_1865del	p.Val622fs
1A	92395	74167295	161	0	0.848	0.848	0.491	22	33	10917381	C	CGCAATCTACAAGTATCTACTCCTCACTACTCAGCAAGCATGGTGAACTTCGTT	INDEL	3_prime_UTR_variant	MODIFIER	TraesCS1A03G0042800.1	2	TraesCS1A03G0042800	c.*770_*771insGCAATCTACAAGTATCTACTCCTCACTACTCAGCAAGCATGGTGAACTTCGTT
1A	92395	74167295	161	0	0.848	0.848	0.491	22	33	10917381	C	CGCAATCTACAAGTATCTACTCCTCACTACTCAGCAAGCATGGTGAACTTCGTT	INDEL	downstream_gene_variant	MODIFIER	TraesCS1A03G0042900.1	-1	TraesCS1A03G0042900	c.*1568_*1569insAACGAAGTTCACCATGCTTGCTGAGTAGTGAGGAGTAGATACTTGTAGATTGC
1A	92395	74167295	161	1	0	-1	0.475	53	48	13049491	G	GTTTGCTTTCGATAAGATTGGCTCCATGACAACGAACACGATCACGAAAGAAAGGAAACGGCACGAGAC	INDEL	splice_donor_variant&intron_variant	HIGH	TraesCS1A03G0054100.1	7	TraesCS1A03G0054100	c.1119_1119+1insTTTGCTTTCGATAAGATTGGCTCCATGACAACGAACACGATCACGAAAGAAAGGAAACGGCACGAGAC
1A	92395	74167295	161	1	0	-1	0.475	53	48	13049491	G	GTTTGCTTTCGATAAGATTGGCTCCATGACAACGAACACGATCACGAAAGAAAGGAAACGGCACGAGAC	INDEL	splice_donor_variant&intron_variant	HIGH	TraesCS1A03G0054100.2	7	TraesCS1A03G0054100	c.1077_1077+1insTTTGCTTTCGATAAGATTGGCTCCATGACAACGAACACGATCACGAAAGAAAGGAAACGGCACGAGAC
1A	92395	74167295	161	0.735	0.171	-0.564	0.551	34	35	14888548	C	G	SNP	missense_variant	MODERATE	TraesCS1A03G0065300.1	5	TraesCS1A03G0065300	c.1867C>G	p.Gln623Glu
1A	92395	74167295	161	0.735	0.171	-0.564	0.551	34	35	14888548	C	G	SNP	upstream_gene_variant	MODIFIER	TraesCS1A03G0065400LC.1	-1	TraesCS1A03G0065400LC	c.-3066C>G
1A	92395	74167295	161	0.735	0.171	-0.564	0.551	34	35	14888548	C	G	SNP	downstream_gene_variant	MODIFIER	TraesCS1A03G0065200LC.1	-1	TraesCS1A03G0065200LC	c.*4760C>G
1A	92395	74167295	161	0	0.952	0.952	0.785	72	21	34711853	T	TCTAGAAGATCTTGCAAAATGACAATTGTTGTTCAATGCACTTGGGATTACATGGAGCCCGTTA	INDEL	splice_region_variant&intron_variant	LOW	TraesCS1A03G0123600LC.1	3	TraesCS1A03G0123600LC	c.237-3_237-2insTAACGGGCTCCATGTAATCCCAAGTGCATTGAACAACAATTGTCATTTTGCAAGATCTTCTAG
1A	92395	74167295	161	0	0.952	0.952	0.785	72	21	34711853	T	TCTAGAAGATCTTGCAAAATGACAATTGTTGTTCAATGCACTTGGGATTACATGGAGCCCGTTA	INDEL	downstream_gene_variant	MODIFIER	TraesCS1A03G0123700LC.1	-1	TraesCS1A03G0123700LC	c.*3366_*3367insTAACGGGCTCCATGTAATCCCAAGTGCATTGAACAACAATTGTCATTTTGCAAGATCTTCTAG
1A	92395	74167295	161	0.957	0	-0.957	0.679	46	91	35557394	T	TAGGACGCGCGGAGGAGGGGAACGAATCGAGCTCGGCGGAAGCGGCGGGAG	INDEL	splice_region_variant&intron_variant	LOW	TraesCS1A03G0127800.1	1	TraesCS1A03G0127800	c.-10-3_-10-2insCTCCCGCCGCTTCCGCCGAGCTCGATTCGTTCCCCTCCTCCGCGCGTCCT
1A	92395	74167295	161	0.957	0	-0.957	0.679	46	91	35557394	T	TAGGACGCGCGGAGGAGGGGAACGAATCGAGCTCGGCGGAAGCGGCGGGAG	INDEL	upstream_gene_variant	MODIFIER	TraesCS1A03G0127600.1	-1	TraesCS1A03G0127600	c.-844_-843insCTCCCGCCGCTTCCGCCGAGCTCGATTCGTTCCCCTCCTCCGCGCGTCCT
1A	92395	74167295	161	0.957	0	-0.957	0.679	46	91	35557394	T	TAGGACGCGCGGAGGAGGGGAACGAATCGAGCTCGGCGGAAGCGGCGGGAG	INDEL	downstream_gene_variant	MODIFIER	TraesCS1A03G0127500.1	-1	TraesCS1A03G0127500	c.*2790_*2791insAGGACGCGCGGAGGAGGGGAACGAATCGAGCTCGGCGGAAGCGGCGGGAG
1A	92395	74167295	161	0.957	0	-0.957	0.679	46	91	35557394	T	TAGGACGCGCGGAGGAGGGGAACGAATCGAGCTCGGCGGAAGCGGCGGGAG	INDEL	downstream_gene_variant	MODIFIER	TraesCS1A03G0127700LC.1	-1	TraesCS1A03G0127700LC	c.*1136_*1137insAGGACGCGCGGAGGAGGGGAACGAATCGAGCTCGGCGGAAGCGGCGGGAG
1A	92395	74167295	161	0	0.924	0.924	0.508	58	66	54581938	C	CCATCATATGCAGATCCCGCAACAAACATATA	INDEL	splice_acceptor_variant&intron_variant	HIGH	TraesCS1A03G0170500.1	6	TraesCS1A03G0170500	c.510-2_510-1insTATATGTTTGTTGCGGGATCTGCATATGATG
1A	92395	74167295	161	0.776	0	-0.776	0.402	98	29	59682042	TAGGTGAGTTCATTGCAAGTCAGAATTTCAGGCACTATGATACGCTTTCAGGACTCAGTTCCCTGTAGAGATCAATTGCAGAGTTAACTCACCGTAACTTAGCGTGATCAGTGGTCCTGTTTTTCTTACTTGTGATCCATTTCACTCGTGA	T	INDEL	frameshift_variant&splice_donor_variant&splice_region_variant&intron_variant	HIGH	TraesCS1A03G0178400.2	4	TraesCS1A03G0178400	c.444_446-3del	p.Ala149fs
1A	92395	74167295	161	0.776	0	-0.776	0.402	98	29	59682042	TAGGTGAGTTCATTGCAAGTCAGAATTTCAGGCACTATGATACGCTTTCAGGACTCAGTTCCCTGTAGAGATCAATTGCAGAGTTAACTCACCGTAACTTAGCGTGATCAGTGGTCCTGTTTTTCTTACTTGTGATCCATTTCACTCGTGA	T	INDEL	splice_region_variant&intron_variant	LOW	TraesCS1A03G0178400.1	4	TraesCS1A03G0178400	c.441+3_441+152del
1A	92395	74167295	161	0.776	0	-0.776	0.402	98	29	59682042	TAGGTGAGTTCATTGCAAGTCAGAATTTCAGGCACTATGATACGCTTTCAGGACTCAGTTCCCTGTAGAGATCAATTGCAGAGTTAACTCACCGTAACTTAGCGTGATCAGTGGTCCTGTTTTTCTTACTTGTGATCCATTTCACTCGTGA	T	INDEL	upstream_gene_variant	MODIFIER	TraesCS1A03G0178500.1	-1	TraesCS1A03G0178500	c.-1546_-1397del
1A	92395	74167295	161	0.776	0	-0.776	0.402	98	29	59682042	TAGGTGAGTTCATTGCAAGTCAGAATTTCAGGCACTATGATACGCTTTCAGGACTCAGTTCCCTGTAGAGATCAATTGCAGAGTTAACTCACCGTAACTTAGCGTGATCAGTGGTCCTGTTTTTCTTACTTGTGATCCATTTCACTCGTGA	T	INDEL	downstream_gene_variant	MODIFIER	TraesCS1A03G0178200.1	-1	TraesCS1A03G0178200	c.*4874_*5023del
1A	92395	74167295	161	0.776	0	-0.776	0.402	98	29	59682042	TAGGTGAGTTCATTGCAAGTCAGAATTTCAGGCACTATGATACGCTTTCAGGACTCAGTTCCCTGTAGAGATCAATTGCAGAGTTAACTCACCGTAACTTAGCGTGATCAGTGGTCCTGTTTTTCTTACTTGTGATCCATTTCACTCGTGA	T	INDEL	downstream_gene_variant	MODIFIER	TraesCS1A03G0178300.1	-1	TraesCS1A03G0178300	c.*2815_*2964del
1A	92395	74167295	161	0	0.844	0.844	0.571	31	32	61612848	CCCTGCAAAGCAGGCACTGGTCAGCAGAATCAGGTGAAACGAGCAGTGTTACCATGATGATATGTAGAATTATTGTTACGATACGACATGATTTGATGGAAATTGTGCAAGCAGGTATAAAGATGCTGAATGTCGGCATCAAGTACTAATAAATTGTTGTAGTGGCAGCAAGCAACTCA	C	INDEL	frameshift_variant&splice_acceptor_variant&splice_donor_variant&splice_region_variant&intron_variant	HIGH	TraesCS1A03G0186500.1	15	TraesCS1A03G0186500	c.1134+2_1135del	p.His380fs
1A	92395	74167295	161	0	0.844	0.844	0.571	31	32	61612848	CCCTGCAAAGCAGGCACTGGTCAGCAGAATCAGGTGAAACGAGCAGTGTTACCATGATGATATGTAGAATTATTGTTACGATACGACATGATTTGATGGAAATTGTGCAAGCAGGTATAAAGATGCTGAATGTCGGCATCAAGTACTAATAAATTGTTGTAGTGGCAGCAAGCAACTCA	C	INDEL	downstream_gene_variant	MODIFIER	TraesCS1A03G0186500.2	-1	TraesCS1A03G0186500	c.*2496_*2673del
1A	92395	74167295	161	0	0.978	0.978	0.617	70	45	67120472	G	GAAGCAACCGAGC	INDEL	splice_donor_variant&intron_variant	HIGH	TraesCS1A03G0197700.1	1	TraesCS1A03G0197700	c.270+1_270+2insAAGCAACCGAGC
1A	92395	74167295	161	0.717	0	-0.717	0.468	92	32	71233338	C	CT	INDEL	downstream_gene_variant	MODIFIER	TraesCS1A03G0204100LC.1	-1	TraesCS1A03G0204100LC	c.*1316_*1317insA
1A	92395	74167295	161	0.717	0	-0.717	0.468	92	32	71233338	C	CT	INDEL	intergenic_region	MODIFIER	TraesCS1A03G0204000LC-TraesCS1A03G0204100LC	-1	TraesCS1A03G0204000LC-TraesCS1A03G0204100LC	n.71233338_71233339insT
1A	92395	74167295	161	0.793	0	-0.793	0.324	116	20	74167247	G	C	SNP	synonymous_variant	LOW	TraesCS1A03G0208000.1	1	TraesCS1A03G0208000	c.807C>G	p.Ser269Ser
1A	92395	74167295	161	0.793	0	-0.793	0.324	116	20	74167247	G	C	SNP	downstream_gene_variant	MODIFIER	TraesCS1A03G0207900.1	-1	TraesCS1A03G0207900	c.*3814G>C
1A	92395	74167295	161	0.791	0	-0.791	0.326	115	20	74167250	A	G	SNP	synonymous_variant	LOW	TraesCS1A03G0208000.1	1	TraesCS1A03G0208000	c.804T>C	p.Leu268Leu
1A	92395	74167295	161	0.791	0	-0.791	0.326	115	20	74167250	A	G	SNP	downstream_gene_variant	MODIFIER	TraesCS1A03G0207900.1	-1	TraesCS1A03G0207900	c.*3817A>G
1A	92395	74167295	161	0.794	0	-0.794	0.336	107	21	74167281	T	C	SNP	missense_variant	MODERATE	TraesCS1A03G0208000.1	1	TraesCS1A03G0208000	c.773A>G	p.Asn258Ser
1A	92395	74167295	161	0.794	0	-0.794	0.336	107	21	74167281	T	C	SNP	downstream_gene_variant	MODIFIER	TraesCS1A03G0207900.1	-1	TraesCS1A03G0207900	c.*3848T>C
1A	92395	74167295	161	0.794	0	-0.794	0.336	107	21	74167282	T	C	SNP	missense_variant	MODERATE	TraesCS1A03G0208000.1	1	TraesCS1A03G0208000	c.772A>G	p.Asn258Asp
1A	92395	74167295	161	0.794	0	-0.794	0.336	107	21	74167282	T	C	SNP	downstream_gene_variant	MODIFIER	TraesCS1A03G0207900.1	-1	TraesCS1A03G0207900	c.*3849T>C
1A	92395	74167295	161	0.79	0	-0.79	0.336	105	20	74167288	A	G	SNP	missense_variant	MODERATE	TraesCS1A03G0208000.1	1	TraesCS1A03G0208000	c.766T>C	p.Tyr256His
1A	92395	74167295	161	0.79	0	-0.79	0.336	105	20	74167288	A	G	SNP	downstream_gene_variant	MODIFIER	TraesCS1A03G0207900.1	-1	TraesCS1A03G0207900	c.*3855A>G
1A	92395	74167295	161	0.8	0	-0.8	0.328	105	20	74167291	G	T	SNP	missense_variant	MODERATE	TraesCS1A03G0208000.1	1	TraesCS1A03G0208000	c.763C>A	p.Arg255Ser
1A	92395	74167295	161	0.8	0	-0.8	0.328	105	20	74167291	G	T	SNP	downstream_gene_variant	MODIFIER	TraesCS1A03G0207900.1	-1	TraesCS1A03G0207900	c.*3858G>T
1A	92395	74167295	161	0.802	0	-0.802	0.325	106	20	74167295	A	G	SNP	synonymous_variant	LOW	TraesCS1A03G0208000.1	1	TraesCS1A03G0208000	c.759T>C	p.Thr253Thr
1A	92395	74167295	161	0.802	0	-0.802	0.325	106	20	74167295	A	G	SNP	downstream_gene_variant	MODIFIER	TraesCS1A03G0207900.1	-1	TraesCS1A03G0207900	c.*3862A>G
1A	14888547	100468093	118	0.735	0.171	-0.564	0.551	34	35	14888548	C	G	SNP	missense_variant	MODERATE	TraesCS1A03G0065300.1	5	TraesCS1A03G0065300	c.1867C>G	p.Gln623Glu
1A	14888547	100468093	118	0.735	0.171	-0.564	0.551	34	35	14888548	C	G	SNP	upstream_gene_variant	MODIFIER	TraesCS1A03G0065400LC.1	-1	TraesCS1A03G0065400LC	c.-3066C>G
1A	14888547	100468093	118	0.735	0.171	-0.564	0.551	34	35	14888548	C	G	SNP	downstream_gene_variant	MODIFIER	TraesCS1A03G0065200LC.1	-1	TraesCS1A03G0065200LC	c.*4760C>G
1A	14888547	100468093	118	0	0.952	0.952	0.785	72	21	34711853	T	TCTAGAAGATCTTGCAAAATGACAATTGTTGTTCAATGCACTTGGGATTACATGGAGCCCGTTA	INDEL	splice_region_variant&intron_variant	LOW	TraesCS1A03G0123600LC.1	3	TraesCS1A03G0123600LC	c.237-3_237-2insTAACGGGCTCCATGTAATCCCAAGTGCATTGAACAACAATTGTCATTTTGCAAGATCTTCTAG
1A	14888547	100468093	118	0	0.952	0.952	0.785	72	21	34711853	T	TCTAGAAGATCTTGCAAAATGACAATTGTTGTTCAATGCACTTGGGATTACATGGAGCCCGTTA	INDEL	downstream_gene_variant	MODIFIER	TraesCS1A03G0123700LC.1	-1	TraesCS1A03G0123700LC	c.*3366_*3367insTAACGGGCTCCATGTAATCCCAAGTGCATTGAACAACAATTGTCATTTTGCAAGATCTTCTAG
1A	14888547	100468093	118	0.957	0	-0.957	0.679	46	91	35557394	T	TAGGACGCGCGGAGGAGGGGAACGAATCGAGCTCGGCGGAAGCGGCGGGAG	INDEL	splice_region_variant&intron_variant	LOW	TraesCS1A03G0127800.1	1	TraesCS1A03G0127800	c.-10-3_-10-2insCTCCCGCCGCTTCCGCCGAGCTCGATTCGTTCCCCTCCTCCGCGCGTCCT
1A	14888547	100468093	118	0.957	0	-0.957	0.679	46	91	35557394	T	TAGGACGCGCGGAGGAGGGGAACGAATCGAGCTCGGCGGAAGCGGCGGGAG	INDEL	upstream_gene_variant	MODIFIER	TraesCS1A03G0127600.1	-1	TraesCS1A03G0127600	c.-844_-843insCTCCCGCCGCTTCCGCCGAGCTCGATTCGTTCCCCTCCTCCGCGCGTCCT
1A	14888547	100468093	118	0.957	0	-0.957	0.679	46	91	35557394	T	TAGGACGCGCGGAGGAGGGGAACGAATCGAGCTCGGCGGAAGCGGCGGGAG	INDEL	downstream_gene_variant	MODIFIER	TraesCS1A03G0127500.1	-1	TraesCS1A03G0127500	c.*2790_*2791insAGGACGCGCGGAGGAGGGGAACGAATCGAGCTCGGCGGAAGCGGCGGGAG
1A	14888547	100468093	118	0.957	0	-0.957	0.679	46	91	35557394	T	TAGGACGCGCGGAGGAGGGGAACGAATCGAGCTCGGCGGAAGCGGCGGGAG	INDEL	downstream_gene_variant	MODIFIER	TraesCS1A03G0127700LC.1	-1	TraesCS1A03G0127700LC	c.*1136_*1137insAGGACGCGCGGAGGAGGGGAACGAATCGAGCTCGGCGGAAGCGGCGGGAG
1A	14888547	100468093	118	0	0.924	0.924	0.508	58	66	54581938	C	CCATCATATGCAGATCCCGCAACAAACATATA	INDEL	splice_acceptor_variant&intron_variant	HIGH	TraesCS1A03G0170500.1	6	TraesCS1A03G0170500	c.510-2_510-1insTATATGTTTGTTGCGGGATCTGCATATGATG
1A	14888547	100468093	118	0.776	0	-0.776	0.402	98	29	59682042	TAGGTGAGTTCATTGCAAGTCAGAATTTCAGGCACTATGATACGCTTTCAGGACTCAGTTCCCTGTAGAGATCAATTGCAGAGTTAACTCACCGTAACTTAGCGTGATCAGTGGTCCTGTTTTTCTTACTTGTGATCCATTTCACTCGTGA	T	INDEL	frameshift_variant&splice_donor_variant&splice_region_variant&intron_variant	HIGH	TraesCS1A03G0178400.2	4	TraesCS1A03G0178400	c.444_446-3del	p.Ala149fs
1A	14888547	100468093	118	0.776	0	-0.776	0.402	98	29	59682042	TAGGTGAGTTCATTGCAAGTCAGAATTTCAGGCACTATGATACGCTTTCAGGACTCAGTTCCCTGTAGAGATCAATTGCAGAGTTAACTCACCGTAACTTAGCGTGATCAGTGGTCCTGTTTTTCTTACTTGTGATCCATTTCACTCGTGA	T	INDEL	splice_region_variant&intron_variant	LOW	TraesCS1A03G0178400.1	4	TraesCS1A03G0178400	c.441+3_441+152del
1A	14888547	100468093	118	0.776	0	-0.776	0.402	98	29	59682042	TAGGTGAGTTCATTGCAAGTCAGAATTTCAGGCACTATGATACGCTTTCAGGACTCAGTTCCCTGTAGAGATCAATTGCAGAGTTAACTCACCGTAACTTAGCGTGATCAGTGGTCCTGTTTTTCTTACTTGTGATCCATTTCACTCGTGA	T	INDEL	upstream_gene_variant	MODIFIER	TraesCS1A03G0178500.1	-1	TraesCS1A03G0178500	c.-1546_-1397del
1A	14888547	100468093	118	0.776	0	-0.776	0.402	98	29	59682042	TAGGTGAGTTCATTGCAAGTCAGAATTTCAGGCACTATGATACGCTTTCAGGACTCAGTTCCCTGTAGAGATCAATTGCAGAGTTAACTCACCGTAACTTAGCGTGATCAGTGGTCCTGTTTTTCTTACTTGTGATCCATTTCACTCGTGA	T	INDEL	downstream_gene_variant	MODIFIER	TraesCS1A03G0178200.1	-1	TraesCS1A03G0178200	c.*4874_*5023del
1A	14888547	100468093	118	0.776	0	-0.776	0.402	98	29	59682042	TAGGTGAGTTCATTGCAAGTCAGAATTTCAGGCACTATGATACGCTTTCAGGACTCAGTTCCCTGTAGAGATCAATTGCAGAGTTAACTCACCGTAACTTAGCGTGATCAGTGGTCCTGTTTTTCTTACTTGTGATCCATTTCACTCGTGA	T	INDEL	downstream_gene_variant	MODIFIER	TraesCS1A03G0178300.1	-1	TraesCS1A03G0178300	c.*2815_*2964del
1A	14888547	100468093	118	0	0.844	0.844	0.571	31	32	61612848	CCCTGCAAAGCAGGCACTGGTCAGCAGAATCAGGTGAAACGAGCAGTGTTACCATGATGATATGTAGAATTATTGTTACGATACGACATGATTTGATGGAAATTGTGCAAGCAGGTATAAAGATGCTGAATGTCGGCATCAAGTACTAATAAATTGTTGTAGTGGCAGCAAGCAACTCA	C	INDEL	frameshift_variant&splice_acceptor_variant&splice_donor_variant&splice_region_variant&intron_variant	HIGH	TraesCS1A03G0186500.1	15	TraesCS1A03G0186500	c.1134+2_1135del	p.His380fs
1A	14888547	100468093	118	0	0.844	0.844	0.571	31	32	61612848	CCCTGCAAAGCAGGCACTGGTCAGCAGAATCAGGTGAAACGAGCAGTGTTACCATGATGATATGTAGAATTATTGTTACGATACGACATGATTTGATGGAAATTGTGCAAGCAGGTATAAAGATGCTGAATGTCGGCATCAAGTACTAATAAATTGTTGTAGTGGCAGCAAGCAACTCA	C	INDEL	downstream_gene_variant	MODIFIER	TraesCS1A03G0186500.2	-1	TraesCS1A03G0186500	c.*2496_*2673del
1A	14888547	100468093	118	0	0.978	0.978	0.617	70	45	67120472	G	GAAGCAACCGAGC	INDEL	splice_donor_variant&intron_variant	HIGH	TraesCS1A03G0197700.1	1	TraesCS1A03G0197700	c.270+1_270+2insAAGCAACCGAGC
1A	14888547	100468093	118	0.717	0	-0.717	0.468	92	32	71233338	C	CT	INDEL	downstream_gene_variant	MODIFIER	TraesCS1A03G0204100LC.1	-1	TraesCS1A03G0204100LC	c.*1316_*1317insA
1A	14888547	100468093	118	0.717	0	-0.717	0.468	92	32	71233338	C	CT	INDEL	intergenic_region	MODIFIER	TraesCS1A03G0204000LC-TraesCS1A03G0204100LC	-1	TraesCS1A03G0204000LC-TraesCS1A03G0204100LC	n.71233338_71233339insT
1A	14888547	100468093	118	0.793	0	-0.793	0.324	116	20	74167247	G	C	SNP	synonymous_variant	LOW	TraesCS1A03G0208000.1	1	TraesCS1A03G0208000	c.807C>G	p.Ser269Ser
1A	14888547	100468093	118	0.793	0	-0.793	0.324	116	20	74167247	G	C	SNP	downstream_gene_variant	MODIFIER	TraesCS1A03G0207900.1	-1	TraesCS1A03G0207900	c.*3814G>C
1A	14888547	100468093	118	0.791	0	-0.791	0.326	115	20	74167250	A	G	SNP	synonymous_variant	LOW	TraesCS1A03G0208000.1	1	TraesCS1A03G0208000	c.804T>C	p.Leu268Leu
1A	14888547	100468093	118	0.791	0	-0.791	0.326	115	20	74167250	A	G	SNP	downstream_gene_variant	MODIFIER	TraesCS1A03G0207900.1	-1	TraesCS1A03G0207900	c.*3817A>G
1A	14888547	100468093	118	0.794	0	-0.794	0.336	107	21	74167281	T	C	SNP	missense_variant	MODERATE	TraesCS1A03G0208000.1	1	TraesCS1A03G0208000	c.773A>G	p.Asn258Ser
1A	14888547	100468093	118	0.794	0	-0.794	0.336	107	21	74167281	T	C	SNP	downstream_gene_variant	MODIFIER	TraesCS1A03G0207900.1	-1	TraesCS1A03G0207900	c.*3848T>C
1A	14888547	100468093	118	0.794	0	-0.794	0.336	107	21	74167282	T	C	SNP	missense_variant	MODERATE	TraesCS1A03G0208000.1	1	TraesCS1A03G0208000	c.772A>G	p.Asn258Asp
1A	14888547	100468093	118	0.794	0	-0.794	0.336	107	21	74167282	T	C	SNP	downstream_gene_variant	MODIFIER	TraesCS1A03G0207900.1	-1	TraesCS1A03G0207900	c.*3849T>C
1A	14888547	100468093	118	0.79	0	-0.79	0.336	105	20	74167288	A	G	SNP	missense_variant	MODERATE	TraesCS1A03G0208000.1	1	TraesCS1A03G0208000	c.766T>C	p.Tyr256His
1A	14888547	100468093	118	0.79	0	-0.79	0.336	105	20	74167288	A	G	SNP	downstream_gene_variant	MODIFIER	TraesCS1A03G0207900.1	-1	TraesCS1A03G0207900	c.*3855A>G
1A	14888547	100468093	118	0.8	0	-0.8	0.328	105	20	74167291	G	T	SNP	missense_variant	MODERATE	TraesCS1A03G0208000.1	1	TraesCS1A03G0208000	c.763C>A	p.Arg255Ser
1A	14888547	100468093	118	0.8	0	-0.8	0.328	105	20	74167291	G	T	SNP	downstream_gene_variant	MODIFIER	TraesCS1A03G0207900.1	-1	TraesCS1A03G0207900	c.*3858G>T
1A	14888547	100468093	118	0.802	0	-0.802	0.325	106	20	74167295	A	G	SNP	synonymous_variant	LOW	TraesCS1A03G0208000.1	1	TraesCS1A03G0208000	c.759T>C	p.Thr253Thr
1A	14888547	100468093	118	0.802	0	-0.802	0.325	106	20	74167295	A	G	SNP	downstream_gene_variant	MODIFIER	TraesCS1A03G0207900.1	-1	TraesCS1A03G0207900	c.*3862A>G
1A	14888547	100468093	118	0.784	0	-0.784	0.331	116	20	74167326	G	A	SNP	missense_variant	MODERATE	TraesCS1A03G0208000.1	1	TraesCS1A03G0208000	c.728C>T	p.Ser243Leu
1A	14888547	100468093	118	0.784	0	-0.784	0.331	116	20	74167326	G	A	SNP	downstream_gene_variant	MODIFIER	TraesCS1A03G0207900.1	-1	TraesCS1A03G0207900	c.*3893G>A
1A	14888547	100468093	118	0.771	0	-0.771	0.349	109	20	74167336	T	C	SNP	missense_variant	MODERATE	TraesCS1A03G0208000.1	1	TraesCS1A03G0208000	c.718A>G	p.Ile240Val
1A	14888547	100468093	118	0.771	0	-0.771	0.349	109	20	74167336	T	C	SNP	downstream_gene_variant	MODIFIER	TraesCS1A03G0207900.1	-1	TraesCS1A03G0207900	c.*3903T>C
1A	14888547	100468093	118	0	0.956	0.956	0.476	74	90	76790380	TCTGCGCAATGGAACAGCACTGAGCAAGTGAGCATTTCGGGCTAGATCTCTTTCCGAAAGGAAAAATATTCATGAGTATAATTCATGCGACAGAACTTTTTTTACAACAAATTCTTATCATGCAAAGAGATAAAGTACAATAAATTACTTAC	T	INDEL	splice_acceptor_variant&splice_donor_variant&splice_region_variant&intron_variant	HIGH	TraesCS1A03G0212200.2	28	TraesCS1A03G0212200	c.2811+1_2812-1del
1A	14888547	100468093	118	0	0.956	0.956	0.476	74	90	76790380	TCTGCGCAATGGAACAGCACTGAGCAAGTGAGCATTTCGGGCTAGATCTCTTTCCGAAAGGAAAAATATTCATGAGTATAATTCATGCGACAGAACTTTTTTTACAACAAATTCTTATCATGCAAAGAGATAAAGTACAATAAATTACTTAC	T	INDEL	splice_acceptor_variant&splice_donor_variant&conservative_inframe_deletion&splice_region_variant&intron_variant	HIGH	TraesCS1A03G0212200.1	22	TraesCS1A03G0212200	c.1959+1_1977del	p.Cys654_Ile660del
1A	14888547	100468093	118	0	0.956	0.956	0.476	74	90	76790380	TCTGCGCAATGGAACAGCACTGAGCAAGTGAGCATTTCGGGCTAGATCTCTTTCCGAAAGGAAAAATATTCATGAGTATAATTCATGCGACAGAACTTTTTTTACAACAAATTCTTATCATGCAAAGAGATAAAGTACAATAAATTACTTAC	T	INDEL	upstream_gene_variant	MODIFIER	TraesCS1A03G0212100LC.1	-1	TraesCS1A03G0212100LC	c.-3336_-3186del
1A	14888547	100468093	118	0.868	0	-0.868	0.582	68	73	83010991	T	TTCTCCACTTGTGTTAACTTG	INDEL	splice_region_variant&intron_variant	LOW	TraesCS1A03G0219300.1	4	TraesCS1A03G0219300	c.425-3_425-2insCAAGTTAACACAAGTGGAGA
1A	14888547	100468093	118	0.868	0	-0.868	0.582	68	73	83010991	T	TTCTCCACTTGTGTTAACTTG	INDEL	downstream_gene_variant	MODIFIER	TraesCS1A03G0219400.1	-1	TraesCS1A03G0219400	c.*3921_*3922insCAAGTTAACACAAGTGGAGA
1A	14888547	100468093	118	0	0.939	0.939	0.663	59	33	100468093	C	CATTGTGCTGAACAGAACAACAA	INDEL	splice_acceptor_variant&intron_variant	HIGH	TraesCS1A03G0247700.1	14	TraesCS1A03G0247700	c.1297-2_1297-1insTTGTTGTTCTGTTCAGCACAAT
1A	61612847	150681869	94	0	0.844	0.844	0.571	31	32	61612848	CCCTGCAAAGCAGGCACTGGTCAGCAGAATCAGGTGAAACGAGCAGTGTTACCATGATGATATGTAGAATTATTGTTACGATACGACATGATTTGATGGAAATTGTGCAAGCAGGTATAAAGATGCTGAATGTCGGCATCAAGTACTAATAAATTGTTGTAGTGGCAGCAAGCAACTCA	C	INDEL	frameshift_variant&splice_acceptor_variant&splice_donor_variant&splice_region_variant&intron_variant	HIGH	TraesCS1A03G0186500.1	15	TraesCS1A03G0186500	c.1134+2_1135del	p.His380fs
1A	61612847	150681869	94	0	0.844	0.844	0.571	31	32	61612848	CCCTGCAAAGCAGGCACTGGTCAGCAGAATCAGGTGAAACGAGCAGTGTTACCATGATGATATGTAGAATTATTGTTACGATACGACATGATTTGATGGAAATTGTGCAAGCAGGTATAAAGATGCTGAATGTCGGCATCAAGTACTAATAAATTGTTGTAGTGGCAGCAAGCAACTCA	C	INDEL	downstream_gene_variant	MODIFIER	TraesCS1A03G0186500.2	-1	TraesCS1A03G0186500	c.*2496_*2673del
1A	61612847	150681869	94	0	0.978	0.978	0.617	70	45	67120472	G	GAAGCAACCGAGC	INDEL	splice_donor_variant&intron_variant	HIGH	TraesCS1A03G0197700.1	1	TraesCS1A03G0197700	c.270+1_270+2insAAGCAACCGAGC
1A	61612847	150681869	94	0.717	0	-0.717	0.468	92	32	71233338	C	CT	INDEL	downstream_gene_variant	MODIFIER	TraesCS1A03G0204100LC.1	-1	TraesCS1A03G0204100LC	c.*1316_*1317insA
1A	61612847	150681869	94	0.717	0	-0.717	0.468	92	32	71233338	C	CT	INDEL	intergenic_region	MODIFIER	TraesCS1A03G0204000LC-TraesCS1A03G0204100LC	-1	TraesCS1A03G0204000LC-TraesCS1A03G0204100LC	n.71233338_71233339insT
1A	61612847	150681869	94	0.793	0	-0.793	0.324	116	20	74167247	G	C	SNP	synonymous_variant	LOW	TraesCS1A03G0208000.1	1	TraesCS1A03G0208000	c.807C>G	p.Ser269Ser
1A	61612847	150681869	94	0.793	0	-0.793	0.324	116	20	74167247	G	C	SNP	downstream_gene_variant	MODIFIER	TraesCS1A03G0207900.1	-1	TraesCS1A03G0207900	c.*3814G>C
1A	61612847	150681869	94	0.791	0	-0.791	0.326	115	20	74167250	A	G	SNP	synonymous_variant	LOW	TraesCS1A03G0208000.1	1	TraesCS1A03G0208000	c.804T>C	p.Leu268Leu
1A	61612847	150681869	94	0.791	0	-0.791	0.326	115	20	74167250	A	G	SNP	downstream_gene_variant	MODIFIER	TraesCS1A03G0207900.1	-1	TraesCS1A03G0207900	c.*3817A>G
1A	61612847	150681869	94	0.794	0	-0.794	0.336	107	21	74167281	T	C	SNP	missense_variant	MODERATE	TraesCS1A03G0208000.1	1	TraesCS1A03G0208000	c.773A>G	p.Asn258Ser
1A	61612847	150681869	94	0.794	0	-0.794	0.336	107	21	74167281	T	C	SNP	downstream_gene_variant	MODIFIER	TraesCS1A03G0207900.1	-1	TraesCS1A03G0207900	c.*3848T>C
1A	61612847	150681869	94	0.794	0	-0.794	0.336	107	21	74167282	T	C	SNP	missense_variant	MODERATE	TraesCS1A03G0208000.1	1	TraesCS1A03G0208000	c.772A>G	p.Asn258Asp
1A	61612847	150681869	94	0.794	0	-0.794	0.336	107	21	74167282	T	C	SNP	downstream_gene_variant	MODIFIER	TraesCS1A03G0207900.1	-1	TraesCS1A03G0207900	c.*3849T>C
1A	61612847	150681869	94	0.79	0	-0.79	0.336	105	20	74167288	A	G	SNP	missense_variant	MODERATE	TraesCS1A03G0208000.1	1	TraesCS1A03G0208000	c.766T>C	p.Tyr256His
1A	61612847	150681869	94	0.79	0	-0.79	0.336	105	20	74167288	A	G	SNP	downstream_gene_variant	MODIFIER	TraesCS1A03G0207900.1	-1	TraesCS1A03G0207900	c.*3855A>G
1A	61612847	150681869	94	0.8	0	-0.8	0.328	105	20	74167291	G	T	SNP	missense_variant	MODERATE	TraesCS1A03G0208000.1	1	TraesCS1A03G0208000	c.763C>A	p.Arg255Ser
1A	61612847	150681869	94	0.8	0	-0.8	0.328	105	20	74167291	G	T	SNP	downstream_gene_variant	MODIFIER	TraesCS1A03G0207900.1	-1	TraesCS1A03G0207900	c.*3858G>T
1A	61612847	150681869	94	0.802	0	-0.802	0.325	106	20	74167295	A	G	SNP	synonymous_variant	LOW	TraesCS1A03G0208000.1	1	TraesCS1A03G0208000	c.759T>C	p.Thr253Thr
1A	61612847	150681869	94	0.802	0	-0.802	0.325	106	20	74167295	A	G	SNP	downstream_gene_variant	MODIFIER	TraesCS1A03G0207900.1	-1	TraesCS1A03G0207900	c.*3862A>G
1A	61612847	150681869	94	0.784	0	-0.784	0.331	116	20	74167326	G	A	SNP	missense_variant	MODERATE	TraesCS1A03G0208000.1	1	TraesCS1A03G0208000	c.728C>T	p.Ser243Leu
1A	61612847	150681869	94	0.784	0	-0.784	0.331	116	20	74167326	G	A	SNP	downstream_gene_variant	MODIFIER	TraesCS1A03G0207900.1	-1	TraesCS1A03G0207900	c.*3893G>A
1A	61612847	150681869	94	0.771	0	-0.771	0.349	109	20	74167336	T	C	SNP	missense_variant	MODERATE	TraesCS1A03G0208000.1	1	TraesCS1A03G0208000	c.718A>G	p.Ile240Val
1A	61612847	150681869	94	0.771	0	-0.771	0.349	109	20	74167336	T	C	SNP	downstream_gene_variant	MODIFIER	TraesCS1A03G0207900.1	-1	TraesCS1A03G0207900	c.*3903T>C
1A	61612847	150681869	94	0	0.956	0.956	0.476	74	90	76790380	TCTGCGCAATGGAACAGCACTGAGCAAGTGAGCATTTCGGGCTAGATCTCTTTCCGAAAGGAAAAATATTCATGAGTATAATTCATGCGACAGAACTTTTTTTACAACAAATTCTTATCATGCAAAGAGATAAAGTACAATAAATTACTTAC	T	INDEL	splice_acceptor_variant&splice_donor_variant&splice_region_variant&intron_variant	HIGH	TraesCS1A03G0212200.2	28	TraesCS1A03G0212200	c.2811+1_2812-1del
1A	61612847	150681869	94	0	0.956	0.956	0.476	74	90	76790380	TCTGCGCAATGGAACAGCACTGAGCAAGTGAGCATTTCGGGCTAGATCTCTTTCCGAAAGGAAAAATATTCATGAGTATAATTCATGCGACAGAACTTTTTTTACAACAAATTCTTATCATGCAAAGAGATAAAGTACAATAAATTACTTAC	T	INDEL	splice_acceptor_variant&splice_donor_variant&conservative_inframe_deletion&splice_region_variant&intron_variant	HIGH	TraesCS1A03G0212200.1	22	TraesCS1A03G0212200	c.1959+1_1977del	p.Cys654_Ile660del
1A	61612847	150681869	94	0	0.956	0.956	0.476	74	90	76790380	TCTGCGCAATGGAACAGCACTGAGCAAGTGAGCATTTCGGGCTAGATCTCTTTCCGAAAGGAAAAATATTCATGAGTATAATTCATGCGACAGAACTTTTTTTACAACAAATTCTTATCATGCAAAGAGATAAAGTACAATAAATTACTTAC	T	INDEL	upstream_gene_variant	MODIFIER	TraesCS1A03G0212100LC.1	-1	TraesCS1A03G0212100LC	c.-3336_-3186del
1A	61612847	150681869	94	0.868	0	-0.868	0.582	68	73	83010991	T	TTCTCCACTTGTGTTAACTTG	INDEL	splice_region_variant&intron_variant	LOW	TraesCS1A03G0219300.1	4	TraesCS1A03G0219300	c.425-3_425-2insCAAGTTAACACAAGTGGAGA
1A	61612847	150681869	94	0.868	0	-0.868	0.582	68	73	83010991	T	TTCTCCACTTGTGTTAACTTG	INDEL	downstream_gene_variant	MODIFIER	TraesCS1A03G0219400.1	-1	TraesCS1A03G0219400	c.*3921_*3922insCAAGTTAACACAAGTGGAGA
1A	61612847	150681869	94	0	0.939	0.939	0.663	59	33	100468093	C	CATTGTGCTGAACAGAACAACAA	INDEL	splice_acceptor_variant&intron_variant	HIGH	TraesCS1A03G0247700.1	14	TraesCS1A03G0247700	c.1297-2_1297-1insTTGTTGTTCTGTTCAGCACAAT
1A	61612847	150681869	94	0.796	0	-0.796	0.473	49	25	106062813	G	GTTAGATGGTCGTCCTATGAGTGGTGACATCGGTCGAGGTGCAACAAGGGAAACTGTTTCTTTTGCT	INDEL	splice_donor_variant&intron_variant	HIGH	TraesCS1A03G0257900.2	8	TraesCS1A03G0257900	c.852_852+1insTTAGATGGTCGTCCTATGAGTGGTGACATCGGTCGAGGTGCAACAAGGGAAACTGTTTCTTTTGCT
1A	61612847	150681869	94	0.796	0	-0.796	0.473	49	25	106062813	G	GTTAGATGGTCGTCCTATGAGTGGTGACATCGGTCGAGGTGCAACAAGGGAAACTGTTTCTTTTGCT	INDEL	intron_variant	MODIFIER	TraesCS1A03G0257900.1	7	TraesCS1A03G0257900	c.756+225_756+226insTTAGATGGTCGTCCTATGAGTGGTGACATCGGTCGAGGTGCAACAAGGGAAACTGTTTCTTTTGCT
1A	61612847	150681869	94	1	0	-1	0.575	37	50	108048693	AACCTGTGAGTTGACAAAGATAACGGTTACATCTCATGTGCTGAAAAATGGGAGGCTGGCGCTTTTAGCACCTAGTAGGTGGAAGCTGCTGCAATTTTTTCACTTGGAATAAATTAAACCATGGAAATAGATAAAAGTAT	A	INDEL	frameshift_variant&splice_acceptor_variant&splice_region_variant&intron_variant	HIGH	TraesCS1A03G0260200.3	18	TraesCS1A03G0260200	c.1878+3_1880del	p.Val627fs
1A	61612847	150681869	94	1	0	-1	0.575	37	50	108048693	AACCTGTGAGTTGACAAAGATAACGGTTACATCTCATGTGCTGAAAAATGGGAGGCTGGCGCTTTTAGCACCTAGTAGGTGGAAGCTGCTGCAATTTTTTCACTTGGAATAAATTAAACCATGGAAATAGATAAAAGTAT	A	INDEL	frameshift_variant&splice_acceptor_variant&splice_region_variant&intron_variant	HIGH	TraesCS1A03G0260200.2	17	TraesCS1A03G0260200	c.1683+3_1685del	p.Val562fs
1A	61612847	150681869	94	1	0	-1	0.575	37	50	108048693	AACCTGTGAGTTGACAAAGATAACGGTTACATCTCATGTGCTGAAAAATGGGAGGCTGGCGCTTTTAGCACCTAGTAGGTGGAAGCTGCTGCAATTTTTTCACTTGGAATAAATTAAACCATGGAAATAGATAAAAGTAT	A	INDEL	frameshift_variant&splice_acceptor_variant&splice_region_variant&intron_variant	HIGH	TraesCS1A03G0260200.4	18	TraesCS1A03G0260200	c.1869+3_1871del	p.Val624fs
1A	61612847	150681869	94	1	0	-1	0.575	37	50	108048693	AACCTGTGAGTTGACAAAGATAACGGTTACATCTCATGTGCTGAAAAATGGGAGGCTGGCGCTTTTAGCACCTAGTAGGTGGAAGCTGCTGCAATTTTTTCACTTGGAATAAATTAAACCATGGAAATAGATAAAAGTAT	A	INDEL	splice_region_variant&intron_variant	LOW	TraesCS1A03G0260200.1	16	TraesCS1A03G0260200	c.1719+3_1720-77del
1A	61612847	150681869	94	1	0	-1	0.575	37	50	108048693	AACCTGTGAGTTGACAAAGATAACGGTTACATCTCATGTGCTGAAAAATGGGAGGCTGGCGCTTTTAGCACCTAGTAGGTGGAAGCTGCTGCAATTTTTTCACTTGGAATAAATTAAACCATGGAAATAGATAAAAGTAT	A	INDEL	upstream_gene_variant	MODIFIER	TraesCS1A03G0260100.1	-1	TraesCS1A03G0260100	c.-2324_-2186del
1A	61612847	150681869	94	0.914	0	-0.914	0.406	128	69	121309730	TCCTGCAATTCAGAACATTTATTCAGGTCAAGCTTAACTTTTCAGATATGCCGCAAGGCGTAAACATCCAAATGCAACAAACAGCTCAAAACAACTGAGTCGAGGATAAGGTGCCAAGTCTTCGGTATGAGTTCCAGAGATCAAAGAATCATAAGAATCTCTTGTGTGGGTACAAGTGGACCAGTACTGTCTTCTTTAAAAACATGGAGGCATGGGTTGTGAAGAAATTGTGCAAGAAAAGAAACCTGTATCATCTTA	T	INDEL	frameshift_variant&splice_acceptor_variant&splice_donor_variant&splice_region_variant&intron_variant	HIGH	TraesCS1A03G0280800.1	6	TraesCS1A03G0280800	c.783+2_784del	p.Glu262fs
1A	61612847	150681869	94	0	0.955	0.955	0.792	79	22	134886247	T	TCG	INDEL	splice_region_variant&intron_variant	LOW	TraesCS1A03G0295200.1	5	TraesCS1A03G0295200	c.1947+2_1947+3insCG
1A	61612847	150681869	94	0	0.955	0.955	0.792	79	22	134886247	T	TCG	INDEL	splice_region_variant&intron_variant	LOW	TraesCS1A03G0295200.3	5	TraesCS1A03G0295200	c.1848+2_1848+3insCG
1A	61612847	150681869	94	0	0.955	0.955	0.792	79	22	134886247	T	TCG	INDEL	splice_region_variant&intron_variant	LOW	TraesCS1A03G0295200.4	5	TraesCS1A03G0295200	c.1947+2_1947+3insCG
1A	61612847	150681869	94	0	0.955	0.955	0.792	79	22	134886247	T	TCG	INDEL	intron_variant	MODIFIER	TraesCS1A03G0295200.2	5	TraesCS1A03G0295200	c.1831+118_1831+119insCG
1A	61612847	150681869	94	0	0.964	0.964	0.516	111	112	150681869	C	CTTCATGCCAAGATCAATGTGCTCCTGAATACCAAACCCAAAGCAACCAGTGTCACTGAAGTTCCT	INDEL	splice_acceptor_variant&intron_variant	HIGH	TraesCS1A03G0310800.1	4	TraesCS1A03G0310800	c.351-1_351insAGGAACTTCAGTGACACTGGTTGCTTTGGGTTTGGTATTCAGGAGCACATTGATCTTGGCATGAA
1A	61612847	150681869	94	0	0.964	0.964	0.516	111	112	150681869	C	CTTCATGCCAAGATCAATGTGCTCCTGAATACCAAACCCAAAGCAACCAGTGTCACTGAAGTTCCT	INDEL	downstream_gene_variant	MODIFIER	TraesCS1A03G0310700LC.1	-1	TraesCS1A03G0310700LC	c.*1472_*1473insTTCATGCCAAGATCAATGTGCTCCTGAATACCAAACCCAAAGCAACCAGTGTCACTGAAGTTCCT
1A	74167280	239602449	43	0.794	0	-0.794	0.336	107	21	74167281	T	C	SNP	missense_variant	MODERATE	TraesCS1A03G0208000.1	1	TraesCS1A03G0208000	c.773A>G	p.Asn258Ser
1A	74167280	239602449	43	0.794	0	-0.794	0.336	107	21	74167281	T	C	SNP	downstream_gene_variant	MODIFIER	TraesCS1A03G0207900.1	-1	TraesCS1A03G0207900	c.*3848T>C
1A	74167280	239602449	43	0.794	0	-0.794	0.336	107	21	74167282	T	C	SNP	missense_variant	MODERATE	TraesCS1A03G0208000.1	1	TraesCS1A03G0208000	c.772A>G	p.Asn258Asp
1A	74167280	239602449	43	0.794	0	-0.794	0.336	107	21	74167282	T	C	SNP	downstream_gene_variant	MODIFIER	TraesCS1A03G0207900.1	-1	TraesCS1A03G0207900	c.*3849T>C
1A	74167280	239602449	43	0.79	0	-0.79	0.336	105	20	74167288	A	G	SNP	missense_variant	MODERATE	TraesCS1A03G0208000.1	1	TraesCS1A03G0208000	c.766T>C	p.Tyr256His
1A	74167280	239602449	43	0.79	0	-0.79	0.336	105	20	74167288	A	G	SNP	downstream_gene_variant	MODIFIER	TraesCS1A03G0207900.1	-1	TraesCS1A03G0207900	c.*3855A>G
1A	74167280	239602449	43	0.8	0	-0.8	0.328	105	20	74167291	G	T	SNP	missense_variant	MODERATE	TraesCS1A03G0208000.1	1	TraesCS1A03G0208000	c.763C>A	p.Arg255Ser
1A	74167280	239602449	43	0.8	0	-0.8	0.328	105	20	74167291	G	T	SNP	downstream_gene_variant	MODIFIER	TraesCS1A03G0207900.1	-1	TraesCS1A03G0207900	c.*3858G>T
1A	74167280	239602449	43	0.802	0	-0.802	0.325	106	20	74167295	A	G	SNP	synonymous_variant	LOW	TraesCS1A03G0208000.1	1	TraesCS1A03G0208000	c.759T>C	p.Thr253Thr
1A	74167280	239602449	43	0.802	0	-0.802	0.325	106	20	74167295	A	G	SNP	downstream_gene_variant	MODIFIER	TraesCS1A03G0207900.1	-1	TraesCS1A03G0207900	c.*3862A>G
1A	74167280	239602449	43	0.784	0	-0.784	0.331	116	20	74167326	G	A	SNP	missense_variant	MODERATE	TraesCS1A03G0208000.1	1	TraesCS1A03G0208000	c.728C>T	p.Ser243Leu
1A	74167280	239602449	43	0.784	0	-0.784	0.331	116	20	74167326	G	A	SNP	downstream_gene_variant	MODIFIER	TraesCS1A03G0207900.1	-1	TraesCS1A03G0207900	c.*3893G>A
1A	74167280	239602449	43	0.771	0	-0.771	0.349	109	20	74167336	T	C	SNP	missense_variant	MODERATE	TraesCS1A03G0208000.1	1	TraesCS1A03G0208000	c.718A>G	p.Ile240Val
1A	74167280	239602449	43	0.771	0	-0.771	0.349	109	20	74167336	T	C	SNP	downstream_gene_variant	MODIFIER	TraesCS1A03G0207900.1	-1	TraesCS1A03G0207900	c.*3903T>C
1A	74167280	239602449	43	0	0.956	0.956	0.476	74	90	76790380	TCTGCGCAATGGAACAGCACTGAGCAAGTGAGCATTTCGGGCTAGATCTCTTTCCGAAAGGAAAAATATTCATGAGTATAATTCATGCGACAGAACTTTTTTTACAACAAATTCTTATCATGCAAAGAGATAAAGTACAATAAATTACTTAC	T	INDEL	splice_acceptor_variant&splice_donor_variant&splice_region_variant&intron_variant	HIGH	TraesCS1A03G0212200.2	28	TraesCS1A03G0212200	c.2811+1_2812-1del
1A	74167280	239602449	43	0	0.956	0.956	0.476	74	90	76790380	TCTGCGCAATGGAACAGCACTGAGCAAGTGAGCATTTCGGGCTAGATCTCTTTCCGAAAGGAAAAATATTCATGAGTATAATTCATGCGACAGAACTTTTTTTACAACAAATTCTTATCATGCAAAGAGATAAAGTACAATAAATTACTTAC	T	INDEL	splice_acceptor_variant&splice_donor_variant&conservative_inframe_deletion&splice_region_variant&intron_variant	HIGH	TraesCS1A03G0212200.1	22	TraesCS1A03G0212200	c.1959+1_1977del	p.Cys654_Ile660del
1A	74167280	239602449	43	0	0.956	0.956	0.476	74	90	76790380	TCTGCGCAATGGAACAGCACTGAGCAAGTGAGCATTTCGGGCTAGATCTCTTTCCGAAAGGAAAAATATTCATGAGTATAATTCATGCGACAGAACTTTTTTTACAACAAATTCTTATCATGCAAAGAGATAAAGTACAATAAATTACTTAC	T	INDEL	upstream_gene_variant	MODIFIER	TraesCS1A03G0212100LC.1	-1	TraesCS1A03G0212100LC	c.-3336_-3186del
1A	74167280	239602449	43	0.868	0	-0.868	0.582	68	73	83010991	T	TTCTCCACTTGTGTTAACTTG	INDEL	splice_region_variant&intron_variant	LOW	TraesCS1A03G0219300.1	4	TraesCS1A03G0219300	c.425-3_425-2insCAAGTTAACACAAGTGGAGA
1A	74167280	239602449	43	0.868	0	-0.868	0.582	68	73	83010991	T	TTCTCCACTTGTGTTAACTTG	INDEL	downstream_gene_variant	MODIFIER	TraesCS1A03G0219400.1	-1	TraesCS1A03G0219400	c.*3921_*3922insCAAGTTAACACAAGTGGAGA
1A	74167280	239602449	43	0	0.939	0.939	0.663	59	33	100468093	C	CATTGTGCTGAACAGAACAACAA	INDEL	splice_acceptor_variant&intron_variant	HIGH	TraesCS1A03G0247700.1	14	TraesCS1A03G0247700	c.1297-2_1297-1insTTGTTGTTCTGTTCAGCACAAT
1A	74167280	239602449	43	0.796	0	-0.796	0.473	49	25	106062813	G	GTTAGATGGTCGTCCTATGAGTGGTGACATCGGTCGAGGTGCAACAAGGGAAACTGTTTCTTTTGCT	INDEL	splice_donor_variant&intron_variant	HIGH	TraesCS1A03G0257900.2	8	TraesCS1A03G0257900	c.852_852+1insTTAGATGGTCGTCCTATGAGTGGTGACATCGGTCGAGGTGCAACAAGGGAAACTGTTTCTTTTGCT
1A	74167280	239602449	43	0.796	0	-0.796	0.473	49	25	106062813	G	GTTAGATGGTCGTCCTATGAGTGGTGACATCGGTCGAGGTGCAACAAGGGAAACTGTTTCTTTTGCT	INDEL	intron_variant	MODIFIER	TraesCS1A03G0257900.1	7	TraesCS1A03G0257900	c.756+225_756+226insTTAGATGGTCGTCCTATGAGTGGTGACATCGGTCGAGGTGCAACAAGGGAAACTGTTTCTTTTGCT
1A	74167280	239602449	43	1	0	-1	0.575	37	50	108048693	AACCTGTGAGTTGACAAAGATAACGGTTACATCTCATGTGCTGAAAAATGGGAGGCTGGCGCTTTTAGCACCTAGTAGGTGGAAGCTGCTGCAATTTTTTCACTTGGAATAAATTAAACCATGGAAATAGATAAAAGTAT	A	INDEL	frameshift_variant&splice_acceptor_variant&splice_region_variant&intron_variant	HIGH	TraesCS1A03G0260200.3	18	TraesCS1A03G0260200	c.1878+3_1880del	p.Val627fs
1A	74167280	239602449	43	1	0	-1	0.575	37	50	108048693	AACCTGTGAGTTGACAAAGATAACGGTTACATCTCATGTGCTGAAAAATGGGAGGCTGGCGCTTTTAGCACCTAGTAGGTGGAAGCTGCTGCAATTTTTTCACTTGGAATAAATTAAACCATGGAAATAGATAAAAGTAT	A	INDEL	frameshift_variant&splice_acceptor_variant&splice_region_variant&intron_variant	HIGH	TraesCS1A03G0260200.2	17	TraesCS1A03G0260200	c.1683+3_1685del	p.Val562fs
1A	74167280	239602449	43	1	0	-1	0.575	37	50	108048693	AACCTGTGAGTTGACAAAGATAACGGTTACATCTCATGTGCTGAAAAATGGGAGGCTGGCGCTTTTAGCACCTAGTAGGTGGAAGCTGCTGCAATTTTTTCACTTGGAATAAATTAAACCATGGAAATAGATAAAAGTAT	A	INDEL	frameshift_variant&splice_acceptor_variant&splice_region_variant&intron_variant	HIGH	TraesCS1A03G0260200.4	18	TraesCS1A03G0260200	c.1869+3_1871del	p.Val624fs
1A	74167280	239602449	43	1	0	-1	0.575	37	50	108048693	AACCTGTGAGTTGACAAAGATAACGGTTACATCTCATGTGCTGAAAAATGGGAGGCTGGCGCTTTTAGCACCTAGTAGGTGGAAGCTGCTGCAATTTTTTCACTTGGAATAAATTAAACCATGGAAATAGATAAAAGTAT	A	INDEL	splice_region_variant&intron_variant	LOW	TraesCS1A03G0260200.1	16	TraesCS1A03G0260200	c.1719+3_1720-77del
1A	74167280	239602449	43	1	0	-1	0.575	37	50	108048693	AACCTGTGAGTTGACAAAGATAACGGTTACATCTCATGTGCTGAAAAATGGGAGGCTGGCGCTTTTAGCACCTAGTAGGTGGAAGCTGCTGCAATTTTTTCACTTGGAATAAATTAAACCATGGAAATAGATAAAAGTAT	A	INDEL	upstream_gene_variant	MODIFIER	TraesCS1A03G0260100.1	-1	TraesCS1A03G0260100	c.-2324_-2186del
1A	74167280	239602449	43	0.914	0	-0.914	0.406	128	69	121309730	TCCTGCAATTCAGAACATTTATTCAGGTCAAGCTTAACTTTTCAGATATGCCGCAAGGCGTAAACATCCAAATGCAACAAACAGCTCAAAACAACTGAGTCGAGGATAAGGTGCCAAGTCTTCGGTATGAGTTCCAGAGATCAAAGAATCATAAGAATCTCTTGTGTGGGTACAAGTGGACCAGTACTGTCTTCTTTAAAAACATGGAGGCATGGGTTGTGAAGAAATTGTGCAAGAAAAGAAACCTGTATCATCTTA	T	INDEL	frameshift_variant&splice_acceptor_variant&splice_donor_variant&splice_region_variant&intron_variant	HIGH	TraesCS1A03G0280800.1	6	TraesCS1A03G0280800	c.783+2_784del	p.Glu262fs
1A	74167280	239602449	43	0	0.955	0.955	0.792	79	22	134886247	T	TCG	INDEL	splice_region_variant&intron_variant	LOW	TraesCS1A03G0295200.1	5	TraesCS1A03G0295200	c.1947+2_1947+3insCG
1A	74167280	239602449	43	0	0.955	0.955	0.792	79	22	134886247	T	TCG	INDEL	splice_region_variant&intron_variant	LOW	TraesCS1A03G0295200.3	5	TraesCS1A03G0295200	c.1848+2_1848+3insCG
1A	74167280	239602449	43	0	0.955	0.955	0.792	79	22	134886247	T	TCG	INDEL	splice_region_variant&intron_variant	LOW	TraesCS1A03G0295200.4	5	TraesCS1A03G0295200	c.1947+2_1947+3insCG
1A	74167280	239602449	43	0	0.955	0.955	0.792	79	22	134886247	T	TCG	INDEL	intron_variant	MODIFIER	TraesCS1A03G0295200.2	5	TraesCS1A03G0295200	c.1831+118_1831+119insCG
1A	74167280	239602449	43	0	0.964	0.964	0.516	111	112	150681869	C	CTTCATGCCAAGATCAATGTGCTCCTGAATACCAAACCCAAAGCAACCAGTGTCACTGAAGTTCCT	INDEL	splice_acceptor_variant&intron_variant	HIGH	TraesCS1A03G0310800.1	4	TraesCS1A03G0310800	c.351-1_351insAGGAACTTCAGTGACACTGGTTGCTTTGGGTTTGGTATTCAGGAGCACATTGATCTTGGCATGAA
1A	74167280	239602449	43	0	0.964	0.964	0.516	111	112	150681869	C	CTTCATGCCAAGATCAATGTGCTCCTGAATACCAAACCCAAAGCAACCAGTGTCACTGAAGTTCCT	INDEL	downstream_gene_variant	MODIFIER	TraesCS1A03G0310700LC.1	-1	TraesCS1A03G0310700LC	c.*1472_*1473insTTCATGCCAAGATCAATGTGCTCCTGAATACCAAACCCAAAGCAACCAGTGTCACTGAAGTTCCT
1A	74167280	239602449	43	0	0.839	0.839	0.687	52	31	165387360	C	CTTAA	INDEL	splice_acceptor_variant&intron_variant	HIGH	TraesCS1A03G0323800.1	4	TraesCS1A03G0323800	c.457-2_457-1insTTAA
1A	74167280	239602449	43	0	0.839	0.839	0.687	52	31	165387360	C	CTTAA	INDEL	upstream_gene_variant	MODIFIER	TraesCS1A03G0323600LC.1	-1	TraesCS1A03G0323600LC	c.-3035_-3034insTTAA
1A	74167280	239602449	43	0	0.839	0.839	0.687	52	31	165387360	C	CTTAA	INDEL	upstream_gene_variant	MODIFIER	TraesCS1A03G0323700LC.1	-1	TraesCS1A03G0323700LC	c.-1494_-1493insTTAA
1A	74167280	239602449	43	0	0.839	0.839	0.687	52	31	165387360	C	CTTAA	INDEL	downstream_gene_variant	MODIFIER	TraesCS1A03G0323900LC.1	-1	TraesCS1A03G0323900LC	c.*3345_*3346insTTAA
1A	74167280	239602449	43	0	0.815	0.815	0.607	29	27	165387364	A	ATCTAGGCGATATCTG	INDEL	splice_region_variant&intron_variant	LOW	TraesCS1A03G0323800.1	4	TraesCS1A03G0323800	c.457-6_457-5insCAGATATCGCCTAGA
1A	74167280	239602449	43	0	0.815	0.815	0.607	29	27	165387364	A	ATCTAGGCGATATCTG	INDEL	upstream_gene_variant	MODIFIER	TraesCS1A03G0323600LC.1	-1	TraesCS1A03G0323600LC	c.-3039_-3038insCAGATATCGCCTAGA
1A	74167280	239602449	43	0	0.815	0.815	0.607	29	27	165387364	A	ATCTAGGCGATATCTG	INDEL	upstream_gene_variant	MODIFIER	TraesCS1A03G0323700LC.1	-1	TraesCS1A03G0323700LC	c.-1498_-1497insCAGATATCGCCTAGA
1A	74167280	239602449	43	0	0.815	0.815	0.607	29	27	165387364	A	ATCTAGGCGATATCTG	INDEL	downstream_gene_variant	MODIFIER	TraesCS1A03G0323900LC.1	-1	TraesCS1A03G0323900LC	c.*3341_*3342insCAGATATCGCCTAGA
1A	74167280	239602449	43	0	0.968	0.968	0.605	45	31	187236345	GCCTGAAAGACAGTTAAAAAATAAAAATACTAGCAACAATTGGCTAAACTAAATACAGCCATAACACTCGCCAGATATTCAAAAAAGCAGTTGTTAAAAGCATGTGAAGACAACCATGCAGACATGTATTCTTTCATACAAATATTAACATGAGGCATGATACTGTA	G	INDEL	frameshift_variant&splice_acceptor_variant&splice_donor_variant&splice_region_variant&intron_variant	HIGH	TraesCS1A03G0339400.2	6	TraesCS1A03G0339400	c.1064+2_1065del	p.Arg355fs
1A	74167280	239602449	43	0	0.968	0.968	0.605	45	31	187236345	GCCTGAAAGACAGTTAAAAAATAAAAATACTAGCAACAATTGGCTAAACTAAATACAGCCATAACACTCGCCAGATATTCAAAAAAGCAGTTGTTAAAAGCATGTGAAGACAACCATGCAGACATGTATTCTTTCATACAAATATTAACATGAGGCATGATACTGTA	G	INDEL	frameshift_variant&splice_acceptor_variant&splice_donor_variant&splice_region_variant&intron_variant	HIGH	TraesCS1A03G0339400.1	6	TraesCS1A03G0339400	c.1031+2_1032del	p.Arg344fs
1A	74167280	239602449	43	0	0.878	0.878	0.538	37	41	234235939	G	GAC	INDEL	splice_donor_variant&intron_variant	HIGH	TraesCS1A03G0370000.2	8	TraesCS1A03G0370000	c.1494+1_1494+2insAC
1A	74167280	239602449	43	0	0.878	0.878	0.538	37	41	234235939	G	GAC	INDEL	splice_donor_variant&intron_variant	HIGH	TraesCS1A03G0370000.1	8	TraesCS1A03G0370000	c.1482+1_1482+2insAC
1A	74167280	239602449	43	0	0.878	0.878	0.538	37	41	234235939	G	GAC	INDEL	splice_donor_variant&intron_variant	HIGH	TraesCS1A03G0370000.3	8	TraesCS1A03G0370000	c.1485+1_1485+2insAC
1A	74167280	239602449	43	0	0.878	0.878	0.538	37	41	234235939	G	GAC	INDEL	splice_donor_variant&intron_variant	HIGH	TraesCS1A03G0370000.4	8	TraesCS1A03G0370000	c.1485+1_1485+2insAC
1A	74167280	239602449	43	0	0.878	0.878	0.538	37	41	234235939	G	GAC	INDEL	splice_donor_variant&intron_variant	HIGH	TraesCS1A03G0370000.5	8	TraesCS1A03G0370000	c.1494+1_1494+2insAC
1A	74167280	239602449	43	0	0.878	0.878	0.538	37	41	234235939	G	GAC	INDEL	splice_donor_variant&intron_variant	HIGH	TraesCS1A03G0370000.6	8	TraesCS1A03G0370000	c.1491+1_1491+2insAC
1A	74167280	239602449	43	0	0.878	0.878	0.538	37	41	234235939	G	GAC	INDEL	splice_donor_variant&intron_variant	HIGH	TraesCS1A03G0370000.7	5	TraesCS1A03G0370000	c.909+1_909+2insAC
1A	74167280	239602449	43	0	0.775	0.775	0.595	450	493	239602449	GAGGTTCGTCCCTGGGCTACTGTAGAATTCAACTCTGTGATATGCAGTTAGTTACTTGCAGGTGTTGTAAATGAAGATTTGGTCTCATATTCATCTTGCCCTTTTTCCTTGATTCCATC	G	INDEL	frameshift_variant&splice_donor_variant&splice_region_variant&intron_variant	HIGH	TraesCS1A03G0374600.2	2	TraesCS1A03G0374600	c.482_502-3del	p.Glu161fs
1A	74167280	239602449	43	0	0.775	0.775	0.595	450	493	239602449	GAGGTTCGTCCCTGGGCTACTGTAGAATTCAACTCTGTGATATGCAGTTAGTTACTTGCAGGTGTTGTAAATGAAGATTTGGTCTCATATTCATCTTGCCCTTTTTCCTTGATTCCATC	G	INDEL	frameshift_variant&splice_donor_variant&splice_region_variant&intron_variant	HIGH	TraesCS1A03G0374600.1	2	TraesCS1A03G0374600	c.482_484-3del	p.Glu161fs
1A	74167280	239602449	43	0	0.775	0.775	0.595	450	493	239602449	GAGGTTCGTCCCTGGGCTACTGTAGAATTCAACTCTGTGATATGCAGTTAGTTACTTGCAGGTGTTGTAAATGAAGATTTGGTCTCATATTCATCTTGCCCTTTTTCCTTGATTCCATC	G	INDEL	upstream_gene_variant	MODIFIER	TraesCS1A03G0374500.1	-1	TraesCS1A03G0374500	c.-1210_-1093del
1A	74167325	254714925	28	0.784	0	-0.784	0.331	116	20	74167326	G	A	SNP	missense_variant	MODERATE	TraesCS1A03G0208000.1	1	TraesCS1A03G0208000	c.728C>T	p.Ser243Leu
1A	74167325	254714925	28	0.784	0	-0.784	0.331	116	20	74167326	G	A	SNP	downstream_gene_variant	MODIFIER	TraesCS1A03G0207900.1	-1	TraesCS1A03G0207900	c.*3893G>A
1A	74167325	254714925	28	0.771	0	-0.771	0.349	109	20	74167336	T	C	SNP	missense_variant	MODERATE	TraesCS1A03G0208000.1	1	TraesCS1A03G0208000	c.718A>G	p.Ile240Val
1A	74167325	254714925	28	0.771	0	-0.771	0.349	109	20	74167336	T	C	SNP	downstream_gene_variant	MODIFIER	TraesCS1A03G0207900.1	-1	TraesCS1A03G0207900	c.*3903T>C
1A	74167325	254714925	28	0	0.956	0.956	0.476	74	90	76790380	TCTGCGCAATGGAACAGCACTGAGCAAGTGAGCATTTCGGGCTAGATCTCTTTCCGAAAGGAAAAATATTCATGAGTATAATTCATGCGACAGAACTTTTTTTACAACAAATTCTTATCATGCAAAGAGATAAAGTACAATAAATTACTTAC	T	INDEL	splice_acceptor_variant&splice_donor_variant&splice_region_variant&intron_variant	HIGH	TraesCS1A03G0212200.2	28	TraesCS1A03G0212200	c.2811+1_2812-1del
1A	74167325	254714925	28	0	0.956	0.956	0.476	74	90	76790380	TCTGCGCAATGGAACAGCACTGAGCAAGTGAGCATTTCGGGCTAGATCTCTTTCCGAAAGGAAAAATATTCATGAGTATAATTCATGCGACAGAACTTTTTTTACAACAAATTCTTATCATGCAAAGAGATAAAGTACAATAAATTACTTAC	T	INDEL	splice_acceptor_variant&splice_donor_variant&conservative_inframe_deletion&splice_region_variant&intron_variant	HIGH	TraesCS1A03G0212200.1	22	TraesCS1A03G0212200	c.1959+1_1977del	p.Cys654_Ile660del
1A	74167325	254714925	28	0	0.956	0.956	0.476	74	90	76790380	TCTGCGCAATGGAACAGCACTGAGCAAGTGAGCATTTCGGGCTAGATCTCTTTCCGAAAGGAAAAATATTCATGAGTATAATTCATGCGACAGAACTTTTTTTACAACAAATTCTTATCATGCAAAGAGATAAAGTACAATAAATTACTTAC	T	INDEL	upstream_gene_variant	MODIFIER	TraesCS1A03G0212100LC.1	-1	TraesCS1A03G0212100LC	c.-3336_-3186del
1A	74167325	254714925	28	0.868	0	-0.868	0.582	68	73	83010991	T	TTCTCCACTTGTGTTAACTTG	INDEL	splice_region_variant&intron_variant	LOW	TraesCS1A03G0219300.1	4	TraesCS1A03G0219300	c.425-3_425-2insCAAGTTAACACAAGTGGAGA
1A	74167325	254714925	28	0.868	0	-0.868	0.582	68	73	83010991	T	TTCTCCACTTGTGTTAACTTG	INDEL	downstream_gene_variant	MODIFIER	TraesCS1A03G0219400.1	-1	TraesCS1A03G0219400	c.*3921_*3922insCAAGTTAACACAAGTGGAGA
1A	74167325	254714925	28	0	0.939	0.939	0.663	59	33	100468093	C	CATTGTGCTGAACAGAACAACAA	INDEL	splice_acceptor_variant&intron_variant	HIGH	TraesCS1A03G0247700.1	14	TraesCS1A03G0247700	c.1297-2_1297-1insTTGTTGTTCTGTTCAGCACAAT
1A	74167325	254714925	28	0.796	0	-0.796	0.473	49	25	106062813	G	GTTAGATGGTCGTCCTATGAGTGGTGACATCGGTCGAGGTGCAACAAGGGAAACTGTTTCTTTTGCT	INDEL	splice_donor_variant&intron_variant	HIGH	TraesCS1A03G0257900.2	8	TraesCS1A03G0257900	c.852_852+1insTTAGATGGTCGTCCTATGAGTGGTGACATCGGTCGAGGTGCAACAAGGGAAACTGTTTCTTTTGCT
1A	74167325	254714925	28	0.796	0	-0.796	0.473	49	25	106062813	G	GTTAGATGGTCGTCCTATGAGTGGTGACATCGGTCGAGGTGCAACAAGGGAAACTGTTTCTTTTGCT	INDEL	intron_variant	MODIFIER	TraesCS1A03G0257900.1	7	TraesCS1A03G0257900	c.756+225_756+226insTTAGATGGTCGTCCTATGAGTGGTGACATCGGTCGAGGTGCAACAAGGGAAACTGTTTCTTTTGCT
1A	74167325	254714925	28	1	0	-1	0.575	37	50	108048693	AACCTGTGAGTTGACAAAGATAACGGTTACATCTCATGTGCTGAAAAATGGGAGGCTGGCGCTTTTAGCACCTAGTAGGTGGAAGCTGCTGCAATTTTTTCACTTGGAATAAATTAAACCATGGAAATAGATAAAAGTAT	A	INDEL	frameshift_variant&splice_acceptor_variant&splice_region_variant&intron_variant	HIGH	TraesCS1A03G0260200.3	18	TraesCS1A03G0260200	c.1878+3_1880del	p.Val627fs
1A	74167325	254714925	28	1	0	-1	0.575	37	50	108048693	AACCTGTGAGTTGACAAAGATAACGGTTACATCTCATGTGCTGAAAAATGGGAGGCTGGCGCTTTTAGCACCTAGTAGGTGGAAGCTGCTGCAATTTTTTCACTTGGAATAAATTAAACCATGGAAATAGATAAAAGTAT	A	INDEL	frameshift_variant&splice_acceptor_variant&splice_region_variant&intron_variant	HIGH	TraesCS1A03G0260200.2	17	TraesCS1A03G0260200	c.1683+3_1685del	p.Val562fs
1A	74167325	254714925	28	1	0	-1	0.575	37	50	108048693	AACCTGTGAGTTGACAAAGATAACGGTTACATCTCATGTGCTGAAAAATGGGAGGCTGGCGCTTTTAGCACCTAGTAGGTGGAAGCTGCTGCAATTTTTTCACTTGGAATAAATTAAACCATGGAAATAGATAAAAGTAT	A	INDEL	frameshift_variant&splice_acceptor_variant&splice_region_variant&intron_variant	HIGH	TraesCS1A03G0260200.4	18	TraesCS1A03G0260200	c.1869+3_1871del	p.Val624fs
1A	74167325	254714925	28	1	0	-1	0.575	37	50	108048693	AACCTGTGAGTTGACAAAGATAACGGTTACATCTCATGTGCTGAAAAATGGGAGGCTGGCGCTTTTAGCACCTAGTAGGTGGAAGCTGCTGCAATTTTTTCACTTGGAATAAATTAAACCATGGAAATAGATAAAAGTAT	A	INDEL	splice_region_variant&intron_variant	LOW	TraesCS1A03G0260200.1	16	TraesCS1A03G0260200	c.1719+3_1720-77del
1A	74167325	254714925	28	1	0	-1	0.575	37	50	108048693	AACCTGTGAGTTGACAAAGATAACGGTTACATCTCATGTGCTGAAAAATGGGAGGCTGGCGCTTTTAGCACCTAGTAGGTGGAAGCTGCTGCAATTTTTTCACTTGGAATAAATTAAACCATGGAAATAGATAAAAGTAT	A	INDEL	upstream_gene_variant	MODIFIER	TraesCS1A03G0260100.1	-1	TraesCS1A03G0260100	c.-2324_-2186del
1A	74167325	254714925	28	0.914	0	-0.914	0.406	128	69	121309730	TCCTGCAATTCAGAACATTTATTCAGGTCAAGCTTAACTTTTCAGATATGCCGCAAGGCGTAAACATCCAAATGCAACAAACAGCTCAAAACAACTGAGTCGAGGATAAGGTGCCAAGTCTTCGGTATGAGTTCCAGAGATCAAAGAATCATAAGAATCTCTTGTGTGGGTACAAGTGGACCAGTACTGTCTTCTTTAAAAACATGGAGGCATGGGTTGTGAAGAAATTGTGCAAGAAAAGAAACCTGTATCATCTTA	T	INDEL	frameshift_variant&splice_acceptor_variant&splice_donor_variant&splice_region_variant&intron_variant	HIGH	TraesCS1A03G0280800.1	6	TraesCS1A03G0280800	c.783+2_784del	p.Glu262fs
1A	74167325	254714925	28	0	0.955	0.955	0.792	79	22	134886247	T	TCG	INDEL	splice_region_variant&intron_variant	LOW	TraesCS1A03G0295200.1	5	TraesCS1A03G0295200	c.1947+2_1947+3insCG
1A	74167325	254714925	28	0	0.955	0.955	0.792	79	22	134886247	T	TCG	INDEL	splice_region_variant&intron_variant	LOW	TraesCS1A03G0295200.3	5	TraesCS1A03G0295200	c.1848+2_1848+3insCG
1A	74167325	254714925	28	0	0.955	0.955	0.792	79	22	134886247	T	TCG	INDEL	splice_region_variant&intron_variant	LOW	TraesCS1A03G0295200.4	5	TraesCS1A03G0295200	c.1947+2_1947+3insCG
1A	74167325	254714925	28	0	0.955	0.955	0.792	79	22	134886247	T	TCG	INDEL	intron_variant	MODIFIER	TraesCS1A03G0295200.2	5	TraesCS1A03G0295200	c.1831+118_1831+119insCG
1A	74167325	254714925	28	0	0.964	0.964	0.516	111	112	150681869	C	CTTCATGCCAAGATCAATGTGCTCCTGAATACCAAACCCAAAGCAACCAGTGTCACTGAAGTTCCT	INDEL	splice_acceptor_variant&intron_variant	HIGH	TraesCS1A03G0310800.1	4	TraesCS1A03G0310800	c.351-1_351insAGGAACTTCAGTGACACTGGTTGCTTTGGGTTTGGTATTCAGGAGCACATTGATCTTGGCATGAA
1A	74167325	254714925	28	0	0.964	0.964	0.516	111	112	150681869	C	CTTCATGCCAAGATCAATGTGCTCCTGAATACCAAACCCAAAGCAACCAGTGTCACTGAAGTTCCT	INDEL	downstream_gene_variant	MODIFIER	TraesCS1A03G0310700LC.1	-1	TraesCS1A03G0310700LC	c.*1472_*1473insTTCATGCCAAGATCAATGTGCTCCTGAATACCAAACCCAAAGCAACCAGTGTCACTGAAGTTCCT
1A	74167325	254714925	28	0	0.839	0.839	0.687	52	31	165387360	C	CTTAA	INDEL	splice_acceptor_variant&intron_variant	HIGH	TraesCS1A03G0323800.1	4	TraesCS1A03G0323800	c.457-2_457-1insTTAA
1A	74167325	254714925	28	0	0.839	0.839	0.687	52	31	165387360	C	CTTAA	INDEL	upstream_gene_variant	MODIFIER	TraesCS1A03G0323600LC.1	-1	TraesCS1A03G0323600LC	c.-3035_-3034insTTAA
1A	74167325	254714925	28	0	0.839	0.839	0.687	52	31	165387360	C	CTTAA	INDEL	upstream_gene_variant	MODIFIER	TraesCS1A03G0323700LC.1	-1	TraesCS1A03G0323700LC	c.-1494_-1493insTTAA
1A	74167325	254714925	28	0	0.839	0.839	0.687	52	31	165387360	C	CTTAA	INDEL	downstream_gene_variant	MODIFIER	TraesCS1A03G0323900LC.1	-1	TraesCS1A03G0323900LC	c.*3345_*3346insTTAA
1A	74167325	254714925	28	0	0.815	0.815	0.607	29	27	165387364	A	ATCTAGGCGATATCTG	INDEL	splice_region_variant&intron_variant	LOW	TraesCS1A03G0323800.1	4	TraesCS1A03G0323800	c.457-6_457-5insCAGATATCGCCTAGA
1A	74167325	254714925	28	0	0.815	0.815	0.607	29	27	165387364	A	ATCTAGGCGATATCTG	INDEL	upstream_gene_variant	MODIFIER	TraesCS1A03G0323600LC.1	-1	TraesCS1A03G0323600LC	c.-3039_-3038insCAGATATCGCCTAGA
1A	74167325	254714925	28	0	0.815	0.815	0.607	29	27	165387364	A	ATCTAGGCGATATCTG	INDEL	upstream_gene_variant	MODIFIER	TraesCS1A03G0323700LC.1	-1	TraesCS1A03G0323700LC	c.-1498_-1497insCAGATATCGCCTAGA
1A	74167325	254714925	28	0	0.815	0.815	0.607	29	27	165387364	A	ATCTAGGCGATATCTG	INDEL	downstream_gene_variant	MODIFIER	TraesCS1A03G0323900LC.1	-1	TraesCS1A03G0323900LC	c.*3341_*3342insCAGATATCGCCTAGA
1A	74167325	254714925	28	0	0.968	0.968	0.605	45	31	187236345	GCCTGAAAGACAGTTAAAAAATAAAAATACTAGCAACAATTGGCTAAACTAAATACAGCCATAACACTCGCCAGATATTCAAAAAAGCAGTTGTTAAAAGCATGTGAAGACAACCATGCAGACATGTATTCTTTCATACAAATATTAACATGAGGCATGATACTGTA	G	INDEL	frameshift_variant&splice_acceptor_variant&splice_donor_variant&splice_region_variant&intron_variant	HIGH	TraesCS1A03G0339400.2	6	TraesCS1A03G0339400	c.1064+2_1065del	p.Arg355fs
1A	74167325	254714925	28	0	0.968	0.968	0.605	45	31	187236345	GCCTGAAAGACAGTTAAAAAATAAAAATACTAGCAACAATTGGCTAAACTAAATACAGCCATAACACTCGCCAGATATTCAAAAAAGCAGTTGTTAAAAGCATGTGAAGACAACCATGCAGACATGTATTCTTTCATACAAATATTAACATGAGGCATGATACTGTA	G	INDEL	frameshift_variant&splice_acceptor_variant&splice_donor_variant&splice_region_variant&intron_variant	HIGH	TraesCS1A03G0339400.1	6	TraesCS1A03G0339400	c.1031+2_1032del	p.Arg344fs
1A	74167325	254714925	28	0	0.878	0.878	0.538	37	41	234235939	G	GAC	INDEL	splice_donor_variant&intron_variant	HIGH	TraesCS1A03G0370000.2	8	TraesCS1A03G0370000	c.1494+1_1494+2insAC
1A	74167325	254714925	28	0	0.878	0.878	0.538	37	41	234235939	G	GAC	INDEL	splice_donor_variant&intron_variant	HIGH	TraesCS1A03G0370000.1	8	TraesCS1A03G0370000	c.1482+1_1482+2insAC
1A	74167325	254714925	28	0	0.878	0.878	0.538	37	41	234235939	G	GAC	INDEL	splice_donor_variant&intron_variant	HIGH	TraesCS1A03G0370000.3	8	TraesCS1A03G0370000	c.1485+1_1485+2insAC
1A	74167325	254714925	28	0	0.878	0.878	0.538	37	41	234235939	G	GAC	INDEL	splice_donor_variant&intron_variant	HIGH	TraesCS1A03G0370000.4	8	TraesCS1A03G0370000	c.1485+1_1485+2insAC
1A	74167325	254714925	28	0	0.878	0.878	0.538	37	41	234235939	G	GAC	INDEL	splice_donor_variant&intron_variant	HIGH	TraesCS1A03G0370000.5	8	TraesCS1A03G0370000	c.1494+1_1494+2insAC
1A	74167325	254714925	28	0	0.878	0.878	0.538	37	41	234235939	G	GAC	INDEL	splice_donor_variant&intron_variant	HIGH	TraesCS1A03G0370000.6	8	TraesCS1A03G0370000	c.1491+1_1491+2insAC
1A	74167325	254714925	28	0	0.878	0.878	0.538	37	41	234235939	G	GAC	INDEL	splice_donor_variant&intron_variant	HIGH	TraesCS1A03G0370000.7	5	TraesCS1A03G0370000	c.909+1_909+2insAC
1A	74167325	254714925	28	0	0.775	0.775	0.595	450	493	239602449	GAGGTTCGTCCCTGGGCTACTGTAGAATTCAACTCTGTGATATGCAGTTAGTTACTTGCAGGTGTTGTAAATGAAGATTTGGTCTCATATTCATCTTGCCCTTTTTCCTTGATTCCATC	G	INDEL	frameshift_variant&splice_donor_variant&splice_region_variant&intron_variant	HIGH	TraesCS1A03G0374600.2	2	TraesCS1A03G0374600	c.482_502-3del	p.Glu161fs
1A	74167325	254714925	28	0	0.775	0.775	0.595	450	493	239602449	GAGGTTCGTCCCTGGGCTACTGTAGAATTCAACTCTGTGATATGCAGTTAGTTACTTGCAGGTGTTGTAAATGAAGATTTGGTCTCATATTCATCTTGCCCTTTTTCCTTGATTCCATC	G	INDEL	frameshift_variant&splice_donor_variant&splice_region_variant&intron_variant	HIGH	TraesCS1A03G0374600.1	2	TraesCS1A03G0374600	c.482_484-3del	p.Glu161fs
1A	74167325	254714925	28	0	0.775	0.775	0.595	450	493	239602449	GAGGTTCGTCCCTGGGCTACTGTAGAATTCAACTCTGTGATATGCAGTTAGTTACTTGCAGGTGTTGTAAATGAAGATTTGGTCTCATATTCATCTTGCCCTTTTTCCTTGATTCCATC	G	INDEL	upstream_gene_variant	MODIFIER	TraesCS1A03G0374500.1	-1	TraesCS1A03G0374500	c.-1210_-1093del
1A	74167325	254714925	28	0.72	0	-0.72	0.735	25	43	245681190	C	CTTTCACTTTT	INDEL	splice_acceptor_variant&intron_variant	HIGH	TraesCS1A03G0382300.1	4	TraesCS1A03G0382300	c.512-2_512-1insAAAAGTGAAA
1A	74167325	254714925	28	0.72	0	-0.72	0.735	25	43	245681190	C	CTTTCACTTTT	INDEL	splice_acceptor_variant&intron_variant	HIGH	TraesCS1A03G0382300.2	5	TraesCS1A03G0382300	c.641-2_641-1insAAAAGTGAAA
1A	74167325	254714925	28	0.72	0	-0.72	0.735	25	43	245681190	C	CTTTCACTTTT	INDEL	downstream_gene_variant	MODIFIER	TraesCS1A03G0382300.4	-1	TraesCS1A03G0382300	c.*1644_*1645insAAAAGTGAAA
1A	74167325	254714925	28	0.72	0	-0.72	0.735	25	43	245681190	C	CTTTCACTTTT	INDEL	downstream_gene_variant	MODIFIER	TraesCS1A03G0382300.3	-1	TraesCS1A03G0382300	c.*734_*735insAAAAGTGAAA
1A	74167325	254714925	28	0.72	0	-0.72	0.735	25	43	245681190	C	CTTTCACTTTT	INDEL	downstream_gene_variant	MODIFIER	TraesCS1A03G0382300.5	-1	TraesCS1A03G0382300	c.*1801_*1802insAAAAGTGAAA
1A	74167325	254714925	28	0	0.975	0.975	0.707	93	40	246268621	T	TCAAATTCTTTTGTTTTCAATTGAAACAATG	INDEL	upstream_gene_variant	MODIFIER	TraesCS1A03G0382800LC.2	-1	TraesCS1A03G0382800LC	c.-219_-218insCAAATTCTTTTGTTTTCAATTGAAACAATG
1A	74167325	254714925	28	0	0.975	0.975	0.707	93	40	246268621	T	TCAAATTCTTTTGTTTTCAATTGAAACAATG	INDEL	upstream_gene_variant	MODIFIER	TraesCS1A03G0382900LC.1	-1	TraesCS1A03G0382900LC	c.-1685_-1684insCAAATTCTTTTGTTTTCAATTGAAACAATG
1A	74167325	254714925	28	0	0.975	0.975	0.707	93	40	246268621	T	TCAAATTCTTTTGTTTTCAATTGAAACAATG	INDEL	upstream_gene_variant	MODIFIER	TraesCS1A03G0383000LC.1	-1	TraesCS1A03G0383000LC	c.-4171_-4170insCAAATTCTTTTGTTTTCAATTGAAACAATG
1A	74167325	254714925	28	0	0.975	0.975	0.707	93	40	246268621	T	TCAAATTCTTTTGTTTTCAATTGAAACAATG	INDEL	upstream_gene_variant	MODIFIER	TraesCS1A03G0382800LC.1	-1	TraesCS1A03G0382800LC	c.-219_-218insCAAATTCTTTTGTTTTCAATTGAAACAATG
1A	74167325	254714925	28	0	0.975	0.975	0.707	93	40	246268621	T	TCAAATTCTTTTGTTTTCAATTGAAACAATG	INDEL	upstream_gene_variant	MODIFIER	TraesCS1A03G0382800LC.3	-1	TraesCS1A03G0382800LC	c.-2992_-2991insCAAATTCTTTTGTTTTCAATTGAAACAATG
1A	74167325	254714925	28	0	0.975	0.975	0.707	93	40	246268621	T	TCAAATTCTTTTGTTTTCAATTGAAACAATG	INDEL	downstream_gene_variant	MODIFIER	TraesCS1A03G0382700LC.1	-1	TraesCS1A03G0382700LC	c.*2_*3insCAAATTCTTTTGTTTTCAATTGAAACAATG
1A	74167325	254714925	28	0	0.975	0.975	0.707	93	40	246268621	T	TCAAATTCTTTTGTTTTCAATTGAAACAATG	INDEL	intergenic_region	MODIFIER	TraesCS1A03G0382700LC-TraesCS1A03G0382800LC	-1	TraesCS1A03G0382700LC-TraesCS1A03G0382800LC	n.246268621_246268622insCAAATTCTTTTGTTTTCAATTGAAACAATG
1A	74167325	254714925	28	0.955	0	-0.955	0.326	67	28	253481733	C	CTTAGTGATCACATGTTCATGTGGTAAA	INDEL	splice_acceptor_variant&intron_variant	HIGH	TraesCS1A03G0392100LC.1	2	TraesCS1A03G0392100LC	c.79-2_79-1insTTTACCACATGAACATGTGATCACTAA
1A	74167325	254714925	28	0.955	0	-0.955	0.326	67	28	253481733	C	CTTAGTGATCACATGTTCATGTGGTAAA	INDEL	downstream_gene_variant	MODIFIER	TraesCS1A03G0392200LC.1	-1	TraesCS1A03G0392200LC	c.*1002_*1003insTTTACCACATGAACATGTGATCACTAA
1A	74167325	254714925	28	0.955	0	-0.955	0.326	67	28	253481733	C	CTTAGTGATCACATGTTCATGTGGTAAA	INDEL	downstream_gene_variant	MODIFIER	TraesCS1A03G0392300LC.1	-1	TraesCS1A03G0392300LC	c.*2887_*2888insTTTACCACATGAACATGTGATCACTAA
1A	74167325	254714925	28	0.955	0	-0.955	0.326	67	28	253481733	C	CTTAGTGATCACATGTTCATGTGGTAAA	INDEL	downstream_gene_variant	MODIFIER	TraesCS1A03G0392400LC.1	-1	TraesCS1A03G0392400LC	c.*4137_*4138insTTTACCACATGAACATGTGATCACTAA
1A	74167325	254714925	28	0.9	0	-0.9	0.518	30	26	253481741	T	TGGTTTGCTGCAACTC	INDEL	downstream_gene_variant	MODIFIER	TraesCS1A03G0392200LC.1	-1	TraesCS1A03G0392200LC	c.*994_*995insGAGTTGCAGCAAACC
1A	74167325	254714925	28	0.9	0	-0.9	0.518	30	26	253481741	T	TGGTTTGCTGCAACTC	INDEL	downstream_gene_variant	MODIFIER	TraesCS1A03G0392300LC.1	-1	TraesCS1A03G0392300LC	c.*2879_*2880insGAGTTGCAGCAAACC
1A	74167325	254714925	28	0.9	0	-0.9	0.518	30	26	253481741	T	TGGTTTGCTGCAACTC	INDEL	downstream_gene_variant	MODIFIER	TraesCS1A03G0392400LC.1	-1	TraesCS1A03G0392400LC	c.*4129_*4130insGAGTTGCAGCAAACC
1A	74167325	254714925	28	0.9	0	-0.9	0.518	30	26	253481741	T	TGGTTTGCTGCAACTC	INDEL	intron_variant	MODIFIER	TraesCS1A03G0392100LC.1	2	TraesCS1A03G0392100LC	c.79-10_79-9insGAGTTGCAGCAAACC
1A	74167325	254714925	28	0.973	0	-0.973	0.507	73	71	254714925	T	TGTTGGTATTCCTAGTACTTTAGAACCACGGCCAAATCCTTTGATCACTGGCCCACCAATAA	INDEL	splice_region_variant&intron_variant	LOW	TraesCS1A03G0394600.1	7	TraesCS1A03G0394600	c.782-3_782-2insTTATTGGTGGGCCAGTGATCAAAGGATTTGGCCGTGGTTCTAAAGTACTAGGAATACCAAC
1A	106062812	299622390	30	0.796	0	-0.796	0.473	49	25	106062813	G	GTTAGATGGTCGTCCTATGAGTGGTGACATCGGTCGAGGTGCAACAAGGGAAACTGTTTCTTTTGCT	INDEL	splice_donor_variant&intron_variant	HIGH	TraesCS1A03G0257900.2	8	TraesCS1A03G0257900	c.852_852+1insTTAGATGGTCGTCCTATGAGTGGTGACATCGGTCGAGGTGCAACAAGGGAAACTGTTTCTTTTGCT
1A	106062812	299622390	30	0.796	0	-0.796	0.473	49	25	106062813	G	GTTAGATGGTCGTCCTATGAGTGGTGACATCGGTCGAGGTGCAACAAGGGAAACTGTTTCTTTTGCT	INDEL	intron_variant	MODIFIER	TraesCS1A03G0257900.1	7	TraesCS1A03G0257900	c.756+225_756+226insTTAGATGGTCGTCCTATGAGTGGTGACATCGGTCGAGGTGCAACAAGGGAAACTGTTTCTTTTGCT
1A	106062812	299622390	30	1	0	-1	0.575	37	50	108048693	AACCTGTGAGTTGACAAAGATAACGGTTACATCTCATGTGCTGAAAAATGGGAGGCTGGCGCTTTTAGCACCTAGTAGGTGGAAGCTGCTGCAATTTTTTCACTTGGAATAAATTAAACCATGGAAATAGATAAAAGTAT	A	INDEL	frameshift_variant&splice_acceptor_variant&splice_region_variant&intron_variant	HIGH	TraesCS1A03G0260200.3	18	TraesCS1A03G0260200	c.1878+3_1880del	p.Val627fs
1A	106062812	299622390	30	1	0	-1	0.575	37	50	108048693	AACCTGTGAGTTGACAAAGATAACGGTTACATCTCATGTGCTGAAAAATGGGAGGCTGGCGCTTTTAGCACCTAGTAGGTGGAAGCTGCTGCAATTTTTTCACTTGGAATAAATTAAACCATGGAAATAGATAAAAGTAT	A	INDEL	frameshift_variant&splice_acceptor_variant&splice_region_variant&intron_variant	HIGH	TraesCS1A03G0260200.2	17	TraesCS1A03G0260200	c.1683+3_1685del	p.Val562fs
1A	106062812	299622390	30	1	0	-1	0.575	37	50	108048693	AACCTGTGAGTTGACAAAGATAACGGTTACATCTCATGTGCTGAAAAATGGGAGGCTGGCGCTTTTAGCACCTAGTAGGTGGAAGCTGCTGCAATTTTTTCACTTGGAATAAATTAAACCATGGAAATAGATAAAAGTAT	A	INDEL	frameshift_variant&splice_acceptor_variant&splice_region_variant&intron_variant	HIGH	TraesCS1A03G0260200.4	18	TraesCS1A03G0260200	c.1869+3_1871del	p.Val624fs
1A	106062812	299622390	30	1	0	-1	0.575	37	50	108048693	AACCTGTGAGTTGACAAAGATAACGGTTACATCTCATGTGCTGAAAAATGGGAGGCTGGCGCTTTTAGCACCTAGTAGGTGGAAGCTGCTGCAATTTTTTCACTTGGAATAAATTAAACCATGGAAATAGATAAAAGTAT	A	INDEL	splice_region_variant&intron_variant	LOW	TraesCS1A03G0260200.1	16	TraesCS1A03G0260200	c.1719+3_1720-77del
1A	106062812	299622390	30	1	0	-1	0.575	37	50	108048693	AACCTGTGAGTTGACAAAGATAACGGTTACATCTCATGTGCTGAAAAATGGGAGGCTGGCGCTTTTAGCACCTAGTAGGTGGAAGCTGCTGCAATTTTTTCACTTGGAATAAATTAAACCATGGAAATAGATAAAAGTAT	A	INDEL	upstream_gene_variant	MODIFIER	TraesCS1A03G0260100.1	-1	TraesCS1A03G0260100	c.-2324_-2186del
1A	106062812	299622390	30	0.914	0	-0.914	0.406	128	69	121309730	TCCTGCAATTCAGAACATTTATTCAGGTCAAGCTTAACTTTTCAGATATGCCGCAAGGCGTAAACATCCAAATGCAACAAACAGCTCAAAACAACTGAGTCGAGGATAAGGTGCCAAGTCTTCGGTATGAGTTCCAGAGATCAAAGAATCATAAGAATCTCTTGTGTGGGTACAAGTGGACCAGTACTGTCTTCTTTAAAAACATGGAGGCATGGGTTGTGAAGAAATTGTGCAAGAAAAGAAACCTGTATCATCTTA	T	INDEL	frameshift_variant&splice_acceptor_variant&splice_donor_variant&splice_region_variant&intron_variant	HIGH	TraesCS1A03G0280800.1	6	TraesCS1A03G0280800	c.783+2_784del	p.Glu262fs
1A	106062812	299622390	30	0	0.955	0.955	0.792	79	22	134886247	T	TCG	INDEL	splice_region_variant&intron_variant	LOW	TraesCS1A03G0295200.1	5	TraesCS1A03G0295200	c.1947+2_1947+3insCG
1A	106062812	299622390	30	0	0.955	0.955	0.792	79	22	134886247	T	TCG	INDEL	splice_region_variant&intron_variant	LOW	TraesCS1A03G0295200.3	5	TraesCS1A03G0295200	c.1848+2_1848+3insCG
1A	106062812	299622390	30	0	0.955	0.955	0.792	79	22	134886247	T	TCG	INDEL	splice_region_variant&intron_variant	LOW	TraesCS1A03G0295200.4	5	TraesCS1A03G0295200	c.1947+2_1947+3insCG
1A	106062812	299622390	30	0	0.955	0.955	0.792	79	22	134886247	T	TCG	INDEL	intron_variant	MODIFIER	TraesCS1A03G0295200.2	5	TraesCS1A03G0295200	c.1831+118_1831+119insCG
1A	106062812	299622390	30	0	0.964	0.964	0.516	111	112	150681869	C	CTTCATGCCAAGATCAATGTGCTCCTGAATACCAAACCCAAAGCAACCAGTGTCACTGAAGTTCCT	INDEL	splice_acceptor_variant&intron_variant	HIGH	TraesCS1A03G0310800.1	4	TraesCS1A03G0310800	c.351-1_351insAGGAACTTCAGTGACACTGGTTGCTTTGGGTTTGGTATTCAGGAGCACATTGATCTTGGCATGAA
1A	106062812	299622390	30	0	0.964	0.964	0.516	111	112	150681869	C	CTTCATGCCAAGATCAATGTGCTCCTGAATACCAAACCCAAAGCAACCAGTGTCACTGAAGTTCCT	INDEL	downstream_gene_variant	MODIFIER	TraesCS1A03G0310700LC.1	-1	TraesCS1A03G0310700LC	c.*1472_*1473insTTCATGCCAAGATCAATGTGCTCCTGAATACCAAACCCAAAGCAACCAGTGTCACTGAAGTTCCT
1A	106062812	299622390	30	0	0.839	0.839	0.687	52	31	165387360	C	CTTAA	INDEL	splice_acceptor_variant&intron_variant	HIGH	TraesCS1A03G0323800.1	4	TraesCS1A03G0323800	c.457-2_457-1insTTAA
1A	106062812	299622390	30	0	0.839	0.839	0.687	52	31	165387360	C	CTTAA	INDEL	upstream_gene_variant	MODIFIER	TraesCS1A03G0323600LC.1	-1	TraesCS1A03G0323600LC	c.-3035_-3034insTTAA
1A	106062812	299622390	30	0	0.839	0.839	0.687	52	31	165387360	C	CTTAA	INDEL	upstream_gene_variant	MODIFIER	TraesCS1A03G0323700LC.1	-1	TraesCS1A03G0323700LC	c.-1494_-1493insTTAA
1A	106062812	299622390	30	0	0.839	0.839	0.687	52	31	165387360	C	CTTAA	INDEL	downstream_gene_variant	MODIFIER	TraesCS1A03G0323900LC.1	-1	TraesCS1A03G0323900LC	c.*3345_*3346insTTAA
1A	106062812	299622390	30	0	0.815	0.815	0.607	29	27	165387364	A	ATCTAGGCGATATCTG	INDEL	splice_region_variant&intron_variant	LOW	TraesCS1A03G0323800.1	4	TraesCS1A03G0323800	c.457-6_457-5insCAGATATCGCCTAGA
1A	106062812	299622390	30	0	0.815	0.815	0.607	29	27	165387364	A	ATCTAGGCGATATCTG	INDEL	upstream_gene_variant	MODIFIER	TraesCS1A03G0323600LC.1	-1	TraesCS1A03G0323600LC	c.-3039_-3038insCAGATATCGCCTAGA
1A	106062812	299622390	30	0	0.815	0.815	0.607	29	27	165387364	A	ATCTAGGCGATATCTG	INDEL	upstream_gene_variant	MODIFIER	TraesCS1A03G0323700LC.1	-1	TraesCS1A03G0323700LC	c.-1498_-1497insCAGATATCGCCTAGA
1A	106062812	299622390	30	0	0.815	0.815	0.607	29	27	165387364	A	ATCTAGGCGATATCTG	INDEL	downstream_gene_variant	MODIFIER	TraesCS1A03G0323900LC.1	-1	TraesCS1A03G0323900LC	c.*3341_*3342insCAGATATCGCCTAGA
1A	106062812	299622390	30	0	0.968	0.968	0.605	45	31	187236345	GCCTGAAAGACAGTTAAAAAATAAAAATACTAGCAACAATTGGCTAAACTAAATACAGCCATAACACTCGCCAGATATTCAAAAAAGCAGTTGTTAAAAGCATGTGAAGACAACCATGCAGACATGTATTCTTTCATACAAATATTAACATGAGGCATGATACTGTA	G	INDEL	frameshift_variant&splice_acceptor_variant&splice_donor_variant&splice_region_variant&intron_variant	HIGH	TraesCS1A03G0339400.2	6	TraesCS1A03G0339400	c.1064+2_1065del	p.Arg355fs
1A	106062812	299622390	30	0	0.968	0.968	0.605	45	31	187236345	GCCTGAAAGACAGTTAAAAAATAAAAATACTAGCAACAATTGGCTAAACTAAATACAGCCATAACACTCGCCAGATATTCAAAAAAGCAGTTGTTAAAAGCATGTGAAGACAACCATGCAGACATGTATTCTTTCATACAAATATTAACATGAGGCATGATACTGTA	G	INDEL	frameshift_variant&splice_acceptor_variant&splice_donor_variant&splice_region_variant&intron_variant	HIGH	TraesCS1A03G0339400.1	6	TraesCS1A03G0339400	c.1031+2_1032del	p.Arg344fs
1A	106062812	299622390	30	0	0.878	0.878	0.538	37	41	234235939	G	GAC	INDEL	splice_donor_variant&intron_variant	HIGH	TraesCS1A03G0370000.2	8	TraesCS1A03G0370000	c.1494+1_1494+2insAC
1A	106062812	299622390	30	0	0.878	0.878	0.538	37	41	234235939	G	GAC	INDEL	splice_donor_variant&intron_variant	HIGH	TraesCS1A03G0370000.1	8	TraesCS1A03G0370000	c.1482+1_1482+2insAC
1A	106062812	299622390	30	0	0.878	0.878	0.538	37	41	234235939	G	GAC	INDEL	splice_donor_variant&intron_variant	HIGH	TraesCS1A03G0370000.3	8	TraesCS1A03G0370000	c.1485+1_1485+2insAC
1A	106062812	299622390	30	0	0.878	0.878	0.538	37	41	234235939	G	GAC	INDEL	splice_donor_variant&intron_variant	HIGH	TraesCS1A03G0370000.4	8	TraesCS1A03G0370000	c.1485+1_1485+2insAC
1A	106062812	299622390	30	0	0.878	0.878	0.538	37	41	234235939	G	GAC	INDEL	splice_donor_variant&intron_variant	HIGH	TraesCS1A03G0370000.5	8	TraesCS1A03G0370000	c.1494+1_1494+2insAC
1A	106062812	299622390	30	0	0.878	0.878	0.538	37	41	234235939	G	GAC	INDEL	splice_donor_variant&intron_variant	HIGH	TraesCS1A03G0370000.6	8	TraesCS1A03G0370000	c.1491+1_1491+2insAC
1A	106062812	299622390	30	0	0.878	0.878	0.538	37	41	234235939	G	GAC	INDEL	splice_donor_variant&intron_variant	HIGH	TraesCS1A03G0370000.7	5	TraesCS1A03G0370000	c.909+1_909+2insAC
1A	106062812	299622390	30	0	0.775	0.775	0.595	450	493	239602449	GAGGTTCGTCCCTGGGCTACTGTAGAATTCAACTCTGTGATATGCAGTTAGTTACTTGCAGGTGTTGTAAATGAAGATTTGGTCTCATATTCATCTTGCCCTTTTTCCTTGATTCCATC	G	INDEL	frameshift_variant&splice_donor_variant&splice_region_variant&intron_variant	HIGH	TraesCS1A03G0374600.2	2	TraesCS1A03G0374600	c.482_502-3del	p.Glu161fs
1A	106062812	299622390	30	0	0.775	0.775	0.595	450	493	239602449	GAGGTTCGTCCCTGGGCTACTGTAGAATTCAACTCTGTGATATGCAGTTAGTTACTTGCAGGTGTTGTAAATGAAGATTTGGTCTCATATTCATCTTGCCCTTTTTCCTTGATTCCATC	G	INDEL	frameshift_variant&splice_donor_variant&splice_region_variant&intron_variant	HIGH	TraesCS1A03G0374600.1	2	TraesCS1A03G0374600	c.482_484-3del	p.Glu161fs
1A	106062812	299622390	30	0	0.775	0.775	0.595	450	493	239602449	GAGGTTCGTCCCTGGGCTACTGTAGAATTCAACTCTGTGATATGCAGTTAGTTACTTGCAGGTGTTGTAAATGAAGATTTGGTCTCATATTCATCTTGCCCTTTTTCCTTGATTCCATC	G	INDEL	upstream_gene_variant	MODIFIER	TraesCS1A03G0374500.1	-1	TraesCS1A03G0374500	c.-1210_-1093del
1A	106062812	299622390	30	0.72	0	-0.72	0.735	25	43	245681190	C	CTTTCACTTTT	INDEL	splice_acceptor_variant&intron_variant	HIGH	TraesCS1A03G0382300.1	4	TraesCS1A03G0382300	c.512-2_512-1insAAAAGTGAAA
1A	106062812	299622390	30	0.72	0	-0.72	0.735	25	43	245681190	C	CTTTCACTTTT	INDEL	splice_acceptor_variant&intron_variant	HIGH	TraesCS1A03G0382300.2	5	TraesCS1A03G0382300	c.641-2_641-1insAAAAGTGAAA
1A	106062812	299622390	30	0.72	0	-0.72	0.735	25	43	245681190	C	CTTTCACTTTT	INDEL	downstream_gene_variant	MODIFIER	TraesCS1A03G0382300.4	-1	TraesCS1A03G0382300	c.*1644_*1645insAAAAGTGAAA
1A	106062812	299622390	30	0.72	0	-0.72	0.735	25	43	245681190	C	CTTTCACTTTT	INDEL	downstream_gene_variant	MODIFIER	TraesCS1A03G0382300.3	-1	TraesCS1A03G0382300	c.*734_*735insAAAAGTGAAA
1A	106062812	299622390	30	0.72	0	-0.72	0.735	25	43	245681190	C	CTTTCACTTTT	INDEL	downstream_gene_variant	MODIFIER	TraesCS1A03G0382300.5	-1	TraesCS1A03G0382300	c.*1801_*1802insAAAAGTGAAA
1A	106062812	299622390	30	0	0.975	0.975	0.707	93	40	246268621	T	TCAAATTCTTTTGTTTTCAATTGAAACAATG	INDEL	upstream_gene_variant	MODIFIER	TraesCS1A03G0382800LC.2	-1	TraesCS1A03G0382800LC	c.-219_-218insCAAATTCTTTTGTTTTCAATTGAAACAATG
1A	106062812	299622390	30	0	0.975	0.975	0.707	93	40	246268621	T	TCAAATTCTTTTGTTTTCAATTGAAACAATG	INDEL	upstream_gene_variant	MODIFIER	TraesCS1A03G0382900LC.1	-1	TraesCS1A03G0382900LC	c.-1685_-1684insCAAATTCTTTTGTTTTCAATTGAAACAATG
1A	106062812	299622390	30	0	0.975	0.975	0.707	93	40	246268621	T	TCAAATTCTTTTGTTTTCAATTGAAACAATG	INDEL	upstream_gene_variant	MODIFIER	TraesCS1A03G0383000LC.1	-1	TraesCS1A03G0383000LC	c.-4171_-4170insCAAATTCTTTTGTTTTCAATTGAAACAATG
1A	106062812	299622390	30	0	0.975	0.975	0.707	93	40	246268621	T	TCAAATTCTTTTGTTTTCAATTGAAACAATG	INDEL	upstream_gene_variant	MODIFIER	TraesCS1A03G0382800LC.1	-1	TraesCS1A03G0382800LC	c.-219_-218insCAAATTCTTTTGTTTTCAATTGAAACAATG
1A	106062812	299622390	30	0	0.975	0.975	0.707	93	40	246268621	T	TCAAATTCTTTTGTTTTCAATTGAAACAATG	INDEL	upstream_gene_variant	MODIFIER	TraesCS1A03G0382800LC.3	-1	TraesCS1A03G0382800LC	c.-2992_-2991insCAAATTCTTTTGTTTTCAATTGAAACAATG
1A	106062812	299622390	30	0	0.975	0.975	0.707	93	40	246268621	T	TCAAATTCTTTTGTTTTCAATTGAAACAATG	INDEL	downstream_gene_variant	MODIFIER	TraesCS1A03G0382700LC.1	-1	TraesCS1A03G0382700LC	c.*2_*3insCAAATTCTTTTGTTTTCAATTGAAACAATG
1A	106062812	299622390	30	0	0.975	0.975	0.707	93	40	246268621	T	TCAAATTCTTTTGTTTTCAATTGAAACAATG	INDEL	intergenic_region	MODIFIER	TraesCS1A03G0382700LC-TraesCS1A03G0382800LC	-1	TraesCS1A03G0382700LC-TraesCS1A03G0382800LC	n.246268621_246268622insCAAATTCTTTTGTTTTCAATTGAAACAATG
1A	106062812	299622390	30	0.955	0	-0.955	0.326	67	28	253481733	C	CTTAGTGATCACATGTTCATGTGGTAAA	INDEL	splice_acceptor_variant&intron_variant	HIGH	TraesCS1A03G0392100LC.1	2	TraesCS1A03G0392100LC	c.79-2_79-1insTTTACCACATGAACATGTGATCACTAA
1A	106062812	299622390	30	0.955	0	-0.955	0.326	67	28	253481733	C	CTTAGTGATCACATGTTCATGTGGTAAA	INDEL	downstream_gene_variant	MODIFIER	TraesCS1A03G0392200LC.1	-1	TraesCS1A03G0392200LC	c.*1002_*1003insTTTACCACATGAACATGTGATCACTAA
1A	106062812	299622390	30	0.955	0	-0.955	0.326	67	28	253481733	C	CTTAGTGATCACATGTTCATGTGGTAAA	INDEL	downstream_gene_variant	MODIFIER	TraesCS1A03G0392300LC.1	-1	TraesCS1A03G0392300LC	c.*2887_*2888insTTTACCACATGAACATGTGATCACTAA
1A	106062812	299622390	30	0.955	0	-0.955	0.326	67	28	253481733	C	CTTAGTGATCACATGTTCATGTGGTAAA	INDEL	downstream_gene_variant	MODIFIER	TraesCS1A03G0392400LC.1	-1	TraesCS1A03G0392400LC	c.*4137_*4138insTTTACCACATGAACATGTGATCACTAA
1A	106062812	299622390	30	0.9	0	-0.9	0.518	30	26	253481741	T	TGGTTTGCTGCAACTC	INDEL	downstream_gene_variant	MODIFIER	TraesCS1A03G0392200LC.1	-1	TraesCS1A03G0392200LC	c.*994_*995insGAGTTGCAGCAAACC
1A	106062812	299622390	30	0.9	0	-0.9	0.518	30	26	253481741	T	TGGTTTGCTGCAACTC	INDEL	downstream_gene_variant	MODIFIER	TraesCS1A03G0392300LC.1	-1	TraesCS1A03G0392300LC	c.*2879_*2880insGAGTTGCAGCAAACC
1A	106062812	299622390	30	0.9	0	-0.9	0.518	30	26	253481741	T	TGGTTTGCTGCAACTC	INDEL	downstream_gene_variant	MODIFIER	TraesCS1A03G0392400LC.1	-1	TraesCS1A03G0392400LC	c.*4129_*4130insGAGTTGCAGCAAACC
1A	106062812	299622390	30	0.9	0	-0.9	0.518	30	26	253481741	T	TGGTTTGCTGCAACTC	INDEL	intron_variant	MODIFIER	TraesCS1A03G0392100LC.1	2	TraesCS1A03G0392100LC	c.79-10_79-9insGAGTTGCAGCAAACC
1A	106062812	299622390	30	0.973	0	-0.973	0.507	73	71	254714925	T	TGTTGGTATTCCTAGTACTTTAGAACCACGGCCAAATCCTTTGATCACTGGCCCACCAATAA	INDEL	splice_region_variant&intron_variant	LOW	TraesCS1A03G0394600.1	7	TraesCS1A03G0394600	c.782-3_782-2insTTATTGGTGGGCCAGTGATCAAAGGATTTGGCCGTGGTTCTAAAGTACTAGGAATACCAAC
1A	106062812	299622390	30	0	0.771	0.771	0.713	59	35	258694260	T	TGGACA	INDEL	splice_region_variant&intron_variant	LOW	TraesCS1A03G0402100.2	3	TraesCS1A03G0402100	c.525+2_525+3insGGACA
1A	106062812	299622390	30	0	0.771	0.771	0.713	59	35	258694260	T	TGGACA	INDEL	splice_region_variant&intron_variant	LOW	TraesCS1A03G0402100.1	3	TraesCS1A03G0402100	c.513+2_513+3insGGACA
1A	106062812	299622390	30	0	0.771	0.771	0.713	59	35	258694260	T	TGGACA	INDEL	upstream_gene_variant	MODIFIER	TraesCS1A03G0402200.1	-1	TraesCS1A03G0402200	c.-2478_-2477insGGACA
1A	106062812	299622390	30	0	0.771	0.771	0.713	59	35	258694260	T	TGGACA	INDEL	downstream_gene_variant	MODIFIER	TraesCS1A03G0402000.1	-1	TraesCS1A03G0402000	c.*4501_*4502insGGACA
1A	106062812	299622390	30	0.791	0	-0.791	0.575	43	37	263700306	C	CCG	INDEL	splice_acceptor_variant&intron_variant	HIGH	TraesCS1A03G0408100.3	17	TraesCS1A03G0408100	c.2682-2_2682-1insCG
1A	106062812	299622390	30	0.791	0	-0.791	0.575	43	37	263700306	C	CCG	INDEL	splice_acceptor_variant&intron_variant	HIGH	TraesCS1A03G0408100.1	17	TraesCS1A03G0408100	c.2655-2_2655-1insCG
1A	106062812	299622390	30	0.791	0	-0.791	0.575	43	37	263700306	C	CCG	INDEL	splice_acceptor_variant&intron_variant	HIGH	TraesCS1A03G0408100.2	8	TraesCS1A03G0408100	c.1866-2_1866-1insCG
1A	106062812	299622390	30	0.977	0	-0.977	0.323	129	57	274424996	AAGGTGGGTGTCGACGCAACACTCTTACCGCATGGCAGTTTTTTTGGTTTATATATTCTTCCCATGCTTCTACTTGTCAGTCACGCACATGTGTGACCACATTAATTTGTAGCATCTTGCCTAATATTTATTGTATGTCATCTTGC	A	INDEL	frameshift_variant&splice_donor_variant&splice_region_variant&intron_variant	HIGH	TraesCS1A03G0416600.1	6	TraesCS1A03G0416600	c.891_893-3del	p.Gly298fs
1A	106062812	299622390	30	0.977	0	-0.977	0.323	129	57	274424996	AAGGTGGGTGTCGACGCAACACTCTTACCGCATGGCAGTTTTTTTGGTTTATATATTCTTCCCATGCTTCTACTTGTCAGTCACGCACATGTGTGACCACATTAATTTGTAGCATCTTGCCTAATATTTATTGTATGTCATCTTGC	A	INDEL	downstream_gene_variant	MODIFIER	TraesCS1A03G0416500LC.1	-1	TraesCS1A03G0416500LC	c.*5706_*5850del
1A	106062812	299622390	30	0.984	0	-0.984	0.671	124	247	284477545	T	TCGCAAGGCTGCATGCCGAGGATGCTTATAACAGCACTCACAGCCTCGGCCAAGCTCTCCCTAAC	INDEL	splice_region_variant&intron_variant	LOW	TraesCS1A03G0428400.1	17	TraesCS1A03G0428400	c.2476-3_2476-2insGTTAGGGAGAGCTTGGCCGAGGCTGTGAGTGCTGTTATAAGCATCCTCGGCATGCAGCCTTGCG
1A	106062812	299622390	30	0.143	0.778	0.635	0.545	28	27	299622390	CCCTGCAGCAGCATAAACATGTGTGACAGATGATCATGTGCAGTCCAGAAGAGTGTTCAGACACTGGACACCGGGAGGGCAGATTTTGTACAAA	C	INDEL	frameshift_variant&splice_acceptor_variant&splice_donor_variant&splice_region_variant&intron_variant	HIGH	TraesCS1A03G0447800.1	5	TraesCS1A03G0447800	c.312+2_313delTTTGTACAAAATCTGCCCTCCCGGTGTCCAGTGTCTGAACACTCTTCTGGACTGCACATGATCATCTGTCACACATGTTTATGCTGCTGCAGG	p.Gly105fs
1A	165387359	357244090	36	0	0.839	0.839	0.687	52	31	165387360	C	CTTAA	INDEL	splice_acceptor_variant&intron_variant	HIGH	TraesCS1A03G0323800.1	4	TraesCS1A03G0323800	c.457-2_457-1insTTAA
1A	165387359	357244090	36	0	0.839	0.839	0.687	52	31	165387360	C	CTTAA	INDEL	upstream_gene_variant	MODIFIER	TraesCS1A03G0323600LC.1	-1	TraesCS1A03G0323600LC	c.-3035_-3034insTTAA
1A	165387359	357244090	36	0	0.839	0.839	0.687	52	31	165387360	C	CTTAA	INDEL	upstream_gene_variant	MODIFIER	TraesCS1A03G0323700LC.1	-1	TraesCS1A03G0323700LC	c.-1494_-1493insTTAA
1A	165387359	357244090	36	0	0.839	0.839	0.687	52	31	165387360	C	CTTAA	INDEL	downstream_gene_variant	MODIFIER	TraesCS1A03G0323900LC.1	-1	TraesCS1A03G0323900LC	c.*3345_*3346insTTAA
1A	165387359	357244090	36	0	0.815	0.815	0.607	29	27	165387364	A	ATCTAGGCGATATCTG	INDEL	splice_region_variant&intron_variant	LOW	TraesCS1A03G0323800.1	4	TraesCS1A03G0323800	c.457-6_457-5insCAGATATCGCCTAGA
1A	165387359	357244090	36	0	0.815	0.815	0.607	29	27	165387364	A	ATCTAGGCGATATCTG	INDEL	upstream_gene_variant	MODIFIER	TraesCS1A03G0323600LC.1	-1	TraesCS1A03G0323600LC	c.-3039_-3038insCAGATATCGCCTAGA
1A	165387359	357244090	36	0	0.815	0.815	0.607	29	27	165387364	A	ATCTAGGCGATATCTG	INDEL	upstream_gene_variant	MODIFIER	TraesCS1A03G0323700LC.1	-1	TraesCS1A03G0323700LC	c.-1498_-1497insCAGATATCGCCTAGA
1A	165387359	357244090	36	0	0.815	0.815	0.607	29	27	165387364	A	ATCTAGGCGATATCTG	INDEL	downstream_gene_variant	MODIFIER	TraesCS1A03G0323900LC.1	-1	TraesCS1A03G0323900LC	c.*3341_*3342insCAGATATCGCCTAGA
1A	165387359	357244090	36	0	0.968	0.968	0.605	45	31	187236345	GCCTGAAAGACAGTTAAAAAATAAAAATACTAGCAACAATTGGCTAAACTAAATACAGCCATAACACTCGCCAGATATTCAAAAAAGCAGTTGTTAAAAGCATGTGAAGACAACCATGCAGACATGTATTCTTTCATACAAATATTAACATGAGGCATGATACTGTA	G	INDEL	frameshift_variant&splice_acceptor_variant&splice_donor_variant&splice_region_variant&intron_variant	HIGH	TraesCS1A03G0339400.2	6	TraesCS1A03G0339400	c.1064+2_1065del	p.Arg355fs
1A	165387359	357244090	36	0	0.968	0.968	0.605	45	31	187236345	GCCTGAAAGACAGTTAAAAAATAAAAATACTAGCAACAATTGGCTAAACTAAATACAGCCATAACACTCGCCAGATATTCAAAAAAGCAGTTGTTAAAAGCATGTGAAGACAACCATGCAGACATGTATTCTTTCATACAAATATTAACATGAGGCATGATACTGTA	G	INDEL	frameshift_variant&splice_acceptor_variant&splice_donor_variant&splice_region_variant&intron_variant	HIGH	TraesCS1A03G0339400.1	6	TraesCS1A03G0339400	c.1031+2_1032del	p.Arg344fs
1A	165387359	357244090	36	0	0.878	0.878	0.538	37	41	234235939	G	GAC	INDEL	splice_donor_variant&intron_variant	HIGH	TraesCS1A03G0370000.2	8	TraesCS1A03G0370000	c.1494+1_1494+2insAC
1A	165387359	357244090	36	0	0.878	0.878	0.538	37	41	234235939	G	GAC	INDEL	splice_donor_variant&intron_variant	HIGH	TraesCS1A03G0370000.1	8	TraesCS1A03G0370000	c.1482+1_1482+2insAC
1A	165387359	357244090	36	0	0.878	0.878	0.538	37	41	234235939	G	GAC	INDEL	splice_donor_variant&intron_variant	HIGH	TraesCS1A03G0370000.3	8	TraesCS1A03G0370000	c.1485+1_1485+2insAC
1A	165387359	357244090	36	0	0.878	0.878	0.538	37	41	234235939	G	GAC	INDEL	splice_donor_variant&intron_variant	HIGH	TraesCS1A03G0370000.4	8	TraesCS1A03G0370000	c.1485+1_1485+2insAC
1A	165387359	357244090	36	0	0.878	0.878	0.538	37	41	234235939	G	GAC	INDEL	splice_donor_variant&intron_variant	HIGH	TraesCS1A03G0370000.5	8	TraesCS1A03G0370000	c.1494+1_1494+2insAC
1A	165387359	357244090	36	0	0.878	0.878	0.538	37	41	234235939	G	GAC	INDEL	splice_donor_variant&intron_variant	HIGH	TraesCS1A03G0370000.6	8	TraesCS1A03G0370000	c.1491+1_1491+2insAC
1A	165387359	357244090	36	0	0.878	0.878	0.538	37	41	234235939	G	GAC	INDEL	splice_donor_variant&intron_variant	HIGH	TraesCS1A03G0370000.7	5	TraesCS1A03G0370000	c.909+1_909+2insAC
1A	165387359	357244090	36	0	0.775	0.775	0.595	450	493	239602449	GAGGTTCGTCCCTGGGCTACTGTAGAATTCAACTCTGTGATATGCAGTTAGTTACTTGCAGGTGTTGTAAATGAAGATTTGGTCTCATATTCATCTTGCCCTTTTTCCTTGATTCCATC	G	INDEL	frameshift_variant&splice_donor_variant&splice_region_variant&intron_variant	HIGH	TraesCS1A03G0374600.2	2	TraesCS1A03G0374600	c.482_502-3del	p.Glu161fs
1A	165387359	357244090	36	0	0.775	0.775	0.595	450	493	239602449	GAGGTTCGTCCCTGGGCTACTGTAGAATTCAACTCTGTGATATGCAGTTAGTTACTTGCAGGTGTTGTAAATGAAGATTTGGTCTCATATTCATCTTGCCCTTTTTCCTTGATTCCATC	G	INDEL	frameshift_variant&splice_donor_variant&splice_region_variant&intron_variant	HIGH	TraesCS1A03G0374600.1	2	TraesCS1A03G0374600	c.482_484-3del	p.Glu161fs
1A	165387359	357244090	36	0	0.775	0.775	0.595	450	493	239602449	GAGGTTCGTCCCTGGGCTACTGTAGAATTCAACTCTGTGATATGCAGTTAGTTACTTGCAGGTGTTGTAAATGAAGATTTGGTCTCATATTCATCTTGCCCTTTTTCCTTGATTCCATC	G	INDEL	upstream_gene_variant	MODIFIER	TraesCS1A03G0374500.1	-1	TraesCS1A03G0374500	c.-1210_-1093del
1A	165387359	357244090	36	0.72	0	-0.72	0.735	25	43	245681190	C	CTTTCACTTTT	INDEL	splice_acceptor_variant&intron_variant	HIGH	TraesCS1A03G0382300.1	4	TraesCS1A03G0382300	c.512-2_512-1insAAAAGTGAAA
1A	165387359	357244090	36	0.72	0	-0.72	0.735	25	43	245681190	C	CTTTCACTTTT	INDEL	splice_acceptor_variant&intron_variant	HIGH	TraesCS1A03G0382300.2	5	TraesCS1A03G0382300	c.641-2_641-1insAAAAGTGAAA
1A	165387359	357244090	36	0.72	0	-0.72	0.735	25	43	245681190	C	CTTTCACTTTT	INDEL	downstream_gene_variant	MODIFIER	TraesCS1A03G0382300.4	-1	TraesCS1A03G0382300	c.*1644_*1645insAAAAGTGAAA
1A	165387359	357244090	36	0.72	0	-0.72	0.735	25	43	245681190	C	CTTTCACTTTT	INDEL	downstream_gene_variant	MODIFIER	TraesCS1A03G0382300.3	-1	TraesCS1A03G0382300	c.*734_*735insAAAAGTGAAA
1A	165387359	357244090	36	0.72	0	-0.72	0.735	25	43	245681190	C	CTTTCACTTTT	INDEL	downstream_gene_variant	MODIFIER	TraesCS1A03G0382300.5	-1	TraesCS1A03G0382300	c.*1801_*1802insAAAAGTGAAA
1A	165387359	357244090	36	0	0.975	0.975	0.707	93	40	246268621	T	TCAAATTCTTTTGTTTTCAATTGAAACAATG	INDEL	upstream_gene_variant	MODIFIER	TraesCS1A03G0382800LC.2	-1	TraesCS1A03G0382800LC	c.-219_-218insCAAATTCTTTTGTTTTCAATTGAAACAATG
1A	165387359	357244090	36	0	0.975	0.975	0.707	93	40	246268621	T	TCAAATTCTTTTGTTTTCAATTGAAACAATG	INDEL	upstream_gene_variant	MODIFIER	TraesCS1A03G0382900LC.1	-1	TraesCS1A03G0382900LC	c.-1685_-1684insCAAATTCTTTTGTTTTCAATTGAAACAATG
1A	165387359	357244090	36	0	0.975	0.975	0.707	93	40	246268621	T	TCAAATTCTTTTGTTTTCAATTGAAACAATG	INDEL	upstream_gene_variant	MODIFIER	TraesCS1A03G0383000LC.1	-1	TraesCS1A03G0383000LC	c.-4171_-4170insCAAATTCTTTTGTTTTCAATTGAAACAATG
1A	165387359	357244090	36	0	0.975	0.975	0.707	93	40	246268621	T	TCAAATTCTTTTGTTTTCAATTGAAACAATG	INDEL	upstream_gene_variant	MODIFIER	TraesCS1A03G0382800LC.1	-1	TraesCS1A03G0382800LC	c.-219_-218insCAAATTCTTTTGTTTTCAATTGAAACAATG
1A	165387359	357244090	36	0	0.975	0.975	0.707	93	40	246268621	T	TCAAATTCTTTTGTTTTCAATTGAAACAATG	INDEL	upstream_gene_variant	MODIFIER	TraesCS1A03G0382800LC.3	-1	TraesCS1A03G0382800LC	c.-2992_-2991insCAAATTCTTTTGTTTTCAATTGAAACAATG
1A	165387359	357244090	36	0	0.975	0.975	0.707	93	40	246268621	T	TCAAATTCTTTTGTTTTCAATTGAAACAATG	INDEL	downstream_gene_variant	MODIFIER	TraesCS1A03G0382700LC.1	-1	TraesCS1A03G0382700LC	c.*2_*3insCAAATTCTTTTGTTTTCAATTGAAACAATG
1A	165387359	357244090	36	0	0.975	0.975	0.707	93	40	246268621	T	TCAAATTCTTTTGTTTTCAATTGAAACAATG	INDEL	intergenic_region	MODIFIER	TraesCS1A03G0382700LC-TraesCS1A03G0382800LC	-1	TraesCS1A03G0382700LC-TraesCS1A03G0382800LC	n.246268621_246268622insCAAATTCTTTTGTTTTCAATTGAAACAATG
1A	165387359	357244090	36	0.955	0	-0.955	0.326	67	28	253481733	C	CTTAGTGATCACATGTTCATGTGGTAAA	INDEL	splice_acceptor_variant&intron_variant	HIGH	TraesCS1A03G0392100LC.1	2	TraesCS1A03G0392100LC	c.79-2_79-1insTTTACCACATGAACATGTGATCACTAA
1A	165387359	357244090	36	0.955	0	-0.955	0.326	67	28	253481733	C	CTTAGTGATCACATGTTCATGTGGTAAA	INDEL	downstream_gene_variant	MODIFIER	TraesCS1A03G0392200LC.1	-1	TraesCS1A03G0392200LC	c.*1002_*1003insTTTACCACATGAACATGTGATCACTAA
1A	165387359	357244090	36	0.955	0	-0.955	0.326	67	28	253481733	C	CTTAGTGATCACATGTTCATGTGGTAAA	INDEL	downstream_gene_variant	MODIFIER	TraesCS1A03G0392300LC.1	-1	TraesCS1A03G0392300LC	c.*2887_*2888insTTTACCACATGAACATGTGATCACTAA
1A	165387359	357244090	36	0.955	0	-0.955	0.326	67	28	253481733	C	CTTAGTGATCACATGTTCATGTGGTAAA	INDEL	downstream_gene_variant	MODIFIER	TraesCS1A03G0392400LC.1	-1	TraesCS1A03G0392400LC	c.*4137_*4138insTTTACCACATGAACATGTGATCACTAA
1A	165387359	357244090	36	0.9	0	-0.9	0.518	30	26	253481741	T	TGGTTTGCTGCAACTC	INDEL	downstream_gene_variant	MODIFIER	TraesCS1A03G0392200LC.1	-1	TraesCS1A03G0392200LC	c.*994_*995insGAGTTGCAGCAAACC
1A	165387359	357244090	36	0.9	0	-0.9	0.518	30	26	253481741	T	TGGTTTGCTGCAACTC	INDEL	downstream_gene_variant	MODIFIER	TraesCS1A03G0392300LC.1	-1	TraesCS1A03G0392300LC	c.*2879_*2880insGAGTTGCAGCAAACC
1A	165387359	357244090	36	0.9	0	-0.9	0.518	30	26	253481741	T	TGGTTTGCTGCAACTC	INDEL	downstream_gene_variant	MODIFIER	TraesCS1A03G0392400LC.1	-1	TraesCS1A03G0392400LC	c.*4129_*4130insGAGTTGCAGCAAACC
1A	165387359	357244090	36	0.9	0	-0.9	0.518	30	26	253481741	T	TGGTTTGCTGCAACTC	INDEL	intron_variant	MODIFIER	TraesCS1A03G0392100LC.1	2	TraesCS1A03G0392100LC	c.79-10_79-9insGAGTTGCAGCAAACC
1A	165387359	357244090	36	0.973	0	-0.973	0.507	73	71	254714925	T	TGTTGGTATTCCTAGTACTTTAGAACCACGGCCAAATCCTTTGATCACTGGCCCACCAATAA	INDEL	splice_region_variant&intron_variant	LOW	TraesCS1A03G0394600.1	7	TraesCS1A03G0394600	c.782-3_782-2insTTATTGGTGGGCCAGTGATCAAAGGATTTGGCCGTGGTTCTAAAGTACTAGGAATACCAAC
1A	165387359	357244090	36	0	0.771	0.771	0.713	59	35	258694260	T	TGGACA	INDEL	splice_region_variant&intron_variant	LOW	TraesCS1A03G0402100.2	3	TraesCS1A03G0402100	c.525+2_525+3insGGACA
1A	165387359	357244090	36	0	0.771	0.771	0.713	59	35	258694260	T	TGGACA	INDEL	splice_region_variant&intron_variant	LOW	TraesCS1A03G0402100.1	3	TraesCS1A03G0402100	c.513+2_513+3insGGACA
1A	165387359	357244090	36	0	0.771	0.771	0.713	59	35	258694260	T	TGGACA	INDEL	upstream_gene_variant	MODIFIER	TraesCS1A03G0402200.1	-1	TraesCS1A03G0402200	c.-2478_-2477insGGACA
1A	165387359	357244090	36	0	0.771	0.771	0.713	59	35	258694260	T	TGGACA	INDEL	downstream_gene_variant	MODIFIER	TraesCS1A03G0402000.1	-1	TraesCS1A03G0402000	c.*4501_*4502insGGACA
1A	165387359	357244090	36	0.791	0	-0.791	0.575	43	37	263700306	C	CCG	INDEL	splice_acceptor_variant&intron_variant	HIGH	TraesCS1A03G0408100.3	17	TraesCS1A03G0408100	c.2682-2_2682-1insCG
1A	165387359	357244090	36	0.791	0	-0.791	0.575	43	37	263700306	C	CCG	INDEL	splice_acceptor_variant&intron_variant	HIGH	TraesCS1A03G0408100.1	17	TraesCS1A03G0408100	c.2655-2_2655-1insCG
1A	165387359	357244090	36	0.791	0	-0.791	0.575	43	37	263700306	C	CCG	INDEL	splice_acceptor_variant&intron_variant	HIGH	TraesCS1A03G0408100.2	8	TraesCS1A03G0408100	c.1866-2_1866-1insCG
1A	165387359	357244090	36	0.977	0	-0.977	0.323	129	57	274424996	AAGGTGGGTGTCGACGCAACACTCTTACCGCATGGCAGTTTTTTTGGTTTATATATTCTTCCCATGCTTCTACTTGTCAGTCACGCACATGTGTGACCACATTAATTTGTAGCATCTTGCCTAATATTTATTGTATGTCATCTTGC	A	INDEL	frameshift_variant&splice_donor_variant&splice_region_variant&intron_variant	HIGH	TraesCS1A03G0416600.1	6	TraesCS1A03G0416600	c.891_893-3del	p.Gly298fs
1A	165387359	357244090	36	0.977	0	-0.977	0.323	129	57	274424996	AAGGTGGGTGTCGACGCAACACTCTTACCGCATGGCAGTTTTTTTGGTTTATATATTCTTCCCATGCTTCTACTTGTCAGTCACGCACATGTGTGACCACATTAATTTGTAGCATCTTGCCTAATATTTATTGTATGTCATCTTGC	A	INDEL	downstream_gene_variant	MODIFIER	TraesCS1A03G0416500LC.1	-1	TraesCS1A03G0416500LC	c.*5706_*5850del
1A	165387359	357244090	36	0.984	0	-0.984	0.671	124	247	284477545	T	TCGCAAGGCTGCATGCCGAGGATGCTTATAACAGCACTCACAGCCTCGGCCAAGCTCTCCCTAAC	INDEL	splice_region_variant&intron_variant	LOW	TraesCS1A03G0428400.1	17	TraesCS1A03G0428400	c.2476-3_2476-2insGTTAGGGAGAGCTTGGCCGAGGCTGTGAGTGCTGTTATAAGCATCCTCGGCATGCAGCCTTGCG
1A	165387359	357244090	36	0.143	0.778	0.635	0.545	28	27	299622390	CCCTGCAGCAGCATAAACATGTGTGACAGATGATCATGTGCAGTCCAGAAGAGTGTTCAGACACTGGACACCGGGAGGGCAGATTTTGTACAAA	C	INDEL	frameshift_variant&splice_acceptor_variant&splice_donor_variant&splice_region_variant&intron_variant	HIGH	TraesCS1A03G0447800.1	5	TraesCS1A03G0447800	c.312+2_313delTTTGTACAAAATCTGCCCTCCCGGTGTCCAGTGTCTGAACACTCTTCTGGACTGCACATGATCATCTGTCACACATGTTTATGCTGCTGCAGG	p.Gly105fs
1A	165387359	357244090	36	0.914	0	-0.914	0.24	163	33	303504463	C	CCCACTGGAGTTTCTACTGCTGCAAGCTAGGTTTCCTGTGCTGCAGTTCAGCAAGGTGGCTACATCCTT	INDEL	splice_acceptor_variant&intron_variant	HIGH	TraesCS1A03G0455800.1	1	TraesCS1A03G0455800	c.1156-2_1156-1insAAGGATGTAGCCACCTTGCTGAACTGCAGCACAGGAAACCTAGCTTGCAGCAGTAGAAACTCCAGTGG
1A	165387359	357244090	36	0.914	0	-0.914	0.24	163	33	303504463	C	CCCACTGGAGTTTCTACTGCTGCAAGCTAGGTTTCCTGTGCTGCAGTTCAGCAAGGTGGCTACATCCTT	INDEL	upstream_gene_variant	MODIFIER	TraesCS1A03G0455700.1	-1	TraesCS1A03G0455700	c.-2326_-2325insAAGGATGTAGCCACCTTGCTGAACTGCAGCACAGGAAACCTAGCTTGCAGCAGTAGAAACTCCAGTGG
1A	165387359	357244090	36	0.826	0	-0.826	0.476	121	70	307319418	G	GAGGGTGAACACGTCGTCAGTTGCCATCCGCGCGCAGGCCGCGGCGGTGTCCGCGCCGACCGCGACCCCGGC	INDEL	splice_donor_variant&intron_variant	HIGH	TraesCS1A03G0461300.2	2	TraesCS1A03G0461300	c.144_144+1insAGGGTGAACACGTCGTCAGTTGCCATCCGCGCGCAGGCCGCGGCGGTGTCCGCGCCGACCGCGACCCCGGC
1A	165387359	357244090	36	0.826	0	-0.826	0.476	121	70	307319418	G	GAGGGTGAACACGTCGTCAGTTGCCATCCGCGCGCAGGCCGCGGCGGTGTCCGCGCCGACCGCGACCCCGGC	INDEL	splice_donor_variant&intron_variant	HIGH	TraesCS1A03G0461300.1	2	TraesCS1A03G0461300	c.144_144+1insAGGGTGAACACGTCGTCAGTTGCCATCCGCGCGCAGGCCGCGGCGGTGTCCGCGCCGACCGCGACCCCGGC
1A	165387359	357244090	36	0.923	0	-0.923	0.579	26	31	337379711	C	CAAAGGA	INDEL	splice_acceptor_variant&intron_variant	HIGH	TraesCS1A03G0499400.1	6	TraesCS1A03G0499400	c.1864-2_1864-1insTCCTTT
1A	165387359	357244090	36	0.923	0	-0.923	0.579	26	31	337379711	C	CAAAGGA	INDEL	splice_acceptor_variant&intron_variant	HIGH	TraesCS1A03G0499400.2	6	TraesCS1A03G0499400	c.1861-2_1861-1insTCCTTT
1A	165387359	357244090	36	0.923	0	-0.923	0.579	26	31	337379711	C	CAAAGGA	INDEL	downstream_gene_variant	MODIFIER	TraesCS1A03G0499200.1	-1	TraesCS1A03G0499200	c.*3011_*3012insAAAGGA
1A	165387359	357244090	36	0.923	0	-0.923	0.579	26	31	337379711	C	CAAAGGA	INDEL	downstream_gene_variant	MODIFIER	TraesCS1A03G0499300.1	-1	TraesCS1A03G0499300	c.*341_*342insAAAGGA
1A	165387359	357244090	36	0	0.977	0.977	0.664	84	44	352288198	A	AATTCAAAGAGGGGAGCTTCCAGCCTCCTGAGATATCATCATC	INDEL	splice_region_variant&intron_variant	LOW	TraesCS1A03G0519800.1	2	TraesCS1A03G0519800	c.768+5_768+6insATTCAAAGAGGGGAGCTTCCAGCCTCCTGAGATATCATCATC
1A	165387359	357244090	36	0	0.977	0.977	0.664	84	44	352288198	A	AATTCAAAGAGGGGAGCTTCCAGCCTCCTGAGATATCATCATC	INDEL	downstream_gene_variant	MODIFIER	TraesCS1A03G0519900.1	-1	TraesCS1A03G0519900	c.*2134_*2135insGATGATGATATCTCAGGAGGCTGGAAGCTCCCCTCTTTGAAT
1A	165387359	357244090	36	0.889	0	-0.889	0.5	27	21	357244090	C	CGGTTGAGTTGGTTGAAGGCTTGT	INDEL	splice_acceptor_variant&intron_variant	HIGH	TraesCS1A03G0530200.2	13	TraesCS1A03G0530200	c.1135-2_1135-1insACAAGCCTTCAACCAACTCAACC
1A	165387359	357244090	36	0.889	0	-0.889	0.5	27	21	357244090	C	CGGTTGAGTTGGTTGAAGGCTTGT	INDEL	splice_acceptor_variant&intron_variant	HIGH	TraesCS1A03G0530200.1	12	TraesCS1A03G0530200	c.1036-2_1036-1insACAAGCCTTCAACCAACTCAACC
1A	165387359	357244090	36	0.889	0	-0.889	0.5	27	21	357244090	C	CGGTTGAGTTGGTTGAAGGCTTGT	INDEL	downstream_gene_variant	MODIFIER	TraesCS1A03G0530100LC.1	-1	TraesCS1A03G0530100LC	c.*1689_*1690insGGTTGAGTTGGTTGAAGGCTTGT
1A	245681189	386898680	59	0.72	0	-0.72	0.735	25	43	245681190	C	CTTTCACTTTT	INDEL	splice_acceptor_variant&intron_variant	HIGH	TraesCS1A03G0382300.1	4	TraesCS1A03G0382300	c.512-2_512-1insAAAAGTGAAA
1A	245681189	386898680	59	0.72	0	-0.72	0.735	25	43	245681190	C	CTTTCACTTTT	INDEL	splice_acceptor_variant&intron_variant	HIGH	TraesCS1A03G0382300.2	5	TraesCS1A03G0382300	c.641-2_641-1insAAAAGTGAAA
1A	245681189	386898680	59	0.72	0	-0.72	0.735	25	43	245681190	C	CTTTCACTTTT	INDEL	downstream_gene_variant	MODIFIER	TraesCS1A03G0382300.4	-1	TraesCS1A03G0382300	c.*1644_*1645insAAAAGTGAAA
1A	245681189	386898680	59	0.72	0	-0.72	0.735	25	43	245681190	C	CTTTCACTTTT	INDEL	downstream_gene_variant	MODIFIER	TraesCS1A03G0382300.3	-1	TraesCS1A03G0382300	c.*734_*735insAAAAGTGAAA
1A	245681189	386898680	59	0.72	0	-0.72	0.735	25	43	245681190	C	CTTTCACTTTT	INDEL	downstream_gene_variant	MODIFIER	TraesCS1A03G0382300.5	-1	TraesCS1A03G0382300	c.*1801_*1802insAAAAGTGAAA
1A	245681189	386898680	59	0	0.975	0.975	0.707	93	40	246268621	T	TCAAATTCTTTTGTTTTCAATTGAAACAATG	INDEL	upstream_gene_variant	MODIFIER	TraesCS1A03G0382800LC.2	-1	TraesCS1A03G0382800LC	c.-219_-218insCAAATTCTTTTGTTTTCAATTGAAACAATG
1A	245681189	386898680	59	0	0.975	0.975	0.707	93	40	246268621	T	TCAAATTCTTTTGTTTTCAATTGAAACAATG	INDEL	upstream_gene_variant	MODIFIER	TraesCS1A03G0382900LC.1	-1	TraesCS1A03G0382900LC	c.-1685_-1684insCAAATTCTTTTGTTTTCAATTGAAACAATG
1A	245681189	386898680	59	0	0.975	0.975	0.707	93	40	246268621	T	TCAAATTCTTTTGTTTTCAATTGAAACAATG	INDEL	upstream_gene_variant	MODIFIER	TraesCS1A03G0383000LC.1	-1	TraesCS1A03G0383000LC	c.-4171_-4170insCAAATTCTTTTGTTTTCAATTGAAACAATG
1A	245681189	386898680	59	0	0.975	0.975	0.707	93	40	246268621	T	TCAAATTCTTTTGTTTTCAATTGAAACAATG	INDEL	upstream_gene_variant	MODIFIER	TraesCS1A03G0382800LC.1	-1	TraesCS1A03G0382800LC	c.-219_-218insCAAATTCTTTTGTTTTCAATTGAAACAATG
1A	245681189	386898680	59	0	0.975	0.975	0.707	93	40	246268621	T	TCAAATTCTTTTGTTTTCAATTGAAACAATG	INDEL	upstream_gene_variant	MODIFIER	TraesCS1A03G0382800LC.3	-1	TraesCS1A03G0382800LC	c.-2992_-2991insCAAATTCTTTTGTTTTCAATTGAAACAATG
1A	245681189	386898680	59	0	0.975	0.975	0.707	93	40	246268621	T	TCAAATTCTTTTGTTTTCAATTGAAACAATG	INDEL	downstream_gene_variant	MODIFIER	TraesCS1A03G0382700LC.1	-1	TraesCS1A03G0382700LC	c.*2_*3insCAAATTCTTTTGTTTTCAATTGAAACAATG
1A	245681189	386898680	59	0	0.975	0.975	0.707	93	40	246268621	T	TCAAATTCTTTTGTTTTCAATTGAAACAATG	INDEL	intergenic_region	MODIFIER	TraesCS1A03G0382700LC-TraesCS1A03G0382800LC	-1	TraesCS1A03G0382700LC-TraesCS1A03G0382800LC	n.246268621_246268622insCAAATTCTTTTGTTTTCAATTGAAACAATG
1A	245681189	386898680	59	0.955	0	-0.955	0.326	67	28	253481733	C	CTTAGTGATCACATGTTCATGTGGTAAA	INDEL	splice_acceptor_variant&intron_variant	HIGH	TraesCS1A03G0392100LC.1	2	TraesCS1A03G0392100LC	c.79-2_79-1insTTTACCACATGAACATGTGATCACTAA
1A	245681189	386898680	59	0.955	0	-0.955	0.326	67	28	253481733	C	CTTAGTGATCACATGTTCATGTGGTAAA	INDEL	downstream_gene_variant	MODIFIER	TraesCS1A03G0392200LC.1	-1	TraesCS1A03G0392200LC	c.*1002_*1003insTTTACCACATGAACATGTGATCACTAA
1A	245681189	386898680	59	0.955	0	-0.955	0.326	67	28	253481733	C	CTTAGTGATCACATGTTCATGTGGTAAA	INDEL	downstream_gene_variant	MODIFIER	TraesCS1A03G0392300LC.1	-1	TraesCS1A03G0392300LC	c.*2887_*2888insTTTACCACATGAACATGTGATCACTAA
1A	245681189	386898680	59	0.955	0	-0.955	0.326	67	28	253481733	C	CTTAGTGATCACATGTTCATGTGGTAAA	INDEL	downstream_gene_variant	MODIFIER	TraesCS1A03G0392400LC.1	-1	TraesCS1A03G0392400LC	c.*4137_*4138insTTTACCACATGAACATGTGATCACTAA
1A	245681189	386898680	59	0.9	0	-0.9	0.518	30	26	253481741	T	TGGTTTGCTGCAACTC	INDEL	downstream_gene_variant	MODIFIER	TraesCS1A03G0392200LC.1	-1	TraesCS1A03G0392200LC	c.*994_*995insGAGTTGCAGCAAACC
1A	245681189	386898680	59	0.9	0	-0.9	0.518	30	26	253481741	T	TGGTTTGCTGCAACTC	INDEL	downstream_gene_variant	MODIFIER	TraesCS1A03G0392300LC.1	-1	TraesCS1A03G0392300LC	c.*2879_*2880insGAGTTGCAGCAAACC
1A	245681189	386898680	59	0.9	0	-0.9	0.518	30	26	253481741	T	TGGTTTGCTGCAACTC	INDEL	downstream_gene_variant	MODIFIER	TraesCS1A03G0392400LC.1	-1	TraesCS1A03G0392400LC	c.*4129_*4130insGAGTTGCAGCAAACC
1A	245681189	386898680	59	0.9	0	-0.9	0.518	30	26	253481741	T	TGGTTTGCTGCAACTC	INDEL	intron_variant	MODIFIER	TraesCS1A03G0392100LC.1	2	TraesCS1A03G0392100LC	c.79-10_79-9insGAGTTGCAGCAAACC
1A	245681189	386898680	59	0.973	0	-0.973	0.507	73	71	254714925	T	TGTTGGTATTCCTAGTACTTTAGAACCACGGCCAAATCCTTTGATCACTGGCCCACCAATAA	INDEL	splice_region_variant&intron_variant	LOW	TraesCS1A03G0394600.1	7	TraesCS1A03G0394600	c.782-3_782-2insTTATTGGTGGGCCAGTGATCAAAGGATTTGGCCGTGGTTCTAAAGTACTAGGAATACCAAC
1A	245681189	386898680	59	0	0.771	0.771	0.713	59	35	258694260	T	TGGACA	INDEL	splice_region_variant&intron_variant	LOW	TraesCS1A03G0402100.2	3	TraesCS1A03G0402100	c.525+2_525+3insGGACA
1A	245681189	386898680	59	0	0.771	0.771	0.713	59	35	258694260	T	TGGACA	INDEL	splice_region_variant&intron_variant	LOW	TraesCS1A03G0402100.1	3	TraesCS1A03G0402100	c.513+2_513+3insGGACA
1A	245681189	386898680	59	0	0.771	0.771	0.713	59	35	258694260	T	TGGACA	INDEL	upstream_gene_variant	MODIFIER	TraesCS1A03G0402200.1	-1	TraesCS1A03G0402200	c.-2478_-2477insGGACA
1A	245681189	386898680	59	0	0.771	0.771	0.713	59	35	258694260	T	TGGACA	INDEL	downstream_gene_variant	MODIFIER	TraesCS1A03G0402000.1	-1	TraesCS1A03G0402000	c.*4501_*4502insGGACA
1A	245681189	386898680	59	0.791	0	-0.791	0.575	43	37	263700306	C	CCG	INDEL	splice_acceptor_variant&intron_variant	HIGH	TraesCS1A03G0408100.3	17	TraesCS1A03G0408100	c.2682-2_2682-1insCG
1A	245681189	386898680	59	0.791	0	-0.791	0.575	43	37	263700306	C	CCG	INDEL	splice_acceptor_variant&intron_variant	HIGH	TraesCS1A03G0408100.1	17	TraesCS1A03G0408100	c.2655-2_2655-1insCG
1A	245681189	386898680	59	0.791	0	-0.791	0.575	43	37	263700306	C	CCG	INDEL	splice_acceptor_variant&intron_variant	HIGH	TraesCS1A03G0408100.2	8	TraesCS1A03G0408100	c.1866-2_1866-1insCG
1A	245681189	386898680	59	0.977	0	-0.977	0.323	129	57	274424996	AAGGTGGGTGTCGACGCAACACTCTTACCGCATGGCAGTTTTTTTGGTTTATATATTCTTCCCATGCTTCTACTTGTCAGTCACGCACATGTGTGACCACATTAATTTGTAGCATCTTGCCTAATATTTATTGTATGTCATCTTGC	A	INDEL	frameshift_variant&splice_donor_variant&splice_region_variant&intron_variant	HIGH	TraesCS1A03G0416600.1	6	TraesCS1A03G0416600	c.891_893-3del	p.Gly298fs
1A	245681189	386898680	59	0.977	0	-0.977	0.323	129	57	274424996	AAGGTGGGTGTCGACGCAACACTCTTACCGCATGGCAGTTTTTTTGGTTTATATATTCTTCCCATGCTTCTACTTGTCAGTCACGCACATGTGTGACCACATTAATTTGTAGCATCTTGCCTAATATTTATTGTATGTCATCTTGC	A	INDEL	downstream_gene_variant	MODIFIER	TraesCS1A03G0416500LC.1	-1	TraesCS1A03G0416500LC	c.*5706_*5850del
1A	245681189	386898680	59	0.984	0	-0.984	0.671	124	247	284477545	T	TCGCAAGGCTGCATGCCGAGGATGCTTATAACAGCACTCACAGCCTCGGCCAAGCTCTCCCTAAC	INDEL	splice_region_variant&intron_variant	LOW	TraesCS1A03G0428400.1	17	TraesCS1A03G0428400	c.2476-3_2476-2insGTTAGGGAGAGCTTGGCCGAGGCTGTGAGTGCTGTTATAAGCATCCTCGGCATGCAGCCTTGCG
1A	245681189	386898680	59	0.143	0.778	0.635	0.545	28	27	299622390	CCCTGCAGCAGCATAAACATGTGTGACAGATGATCATGTGCAGTCCAGAAGAGTGTTCAGACACTGGACACCGGGAGGGCAGATTTTGTACAAA	C	INDEL	frameshift_variant&splice_acceptor_variant&splice_donor_variant&splice_region_variant&intron_variant	HIGH	TraesCS1A03G0447800.1	5	TraesCS1A03G0447800	c.312+2_313delTTTGTACAAAATCTGCCCTCCCGGTGTCCAGTGTCTGAACACTCTTCTGGACTGCACATGATCATCTGTCACACATGTTTATGCTGCTGCAGG	p.Gly105fs
1A	245681189	386898680	59	0.914	0	-0.914	0.24	163	33	303504463	C	CCCACTGGAGTTTCTACTGCTGCAAGCTAGGTTTCCTGTGCTGCAGTTCAGCAAGGTGGCTACATCCTT	INDEL	splice_acceptor_variant&intron_variant	HIGH	TraesCS1A03G0455800.1	1	TraesCS1A03G0455800	c.1156-2_1156-1insAAGGATGTAGCCACCTTGCTGAACTGCAGCACAGGAAACCTAGCTTGCAGCAGTAGAAACTCCAGTGG
1A	245681189	386898680	59	0.914	0	-0.914	0.24	163	33	303504463	C	CCCACTGGAGTTTCTACTGCTGCAAGCTAGGTTTCCTGTGCTGCAGTTCAGCAAGGTGGCTACATCCTT	INDEL	upstream_gene_variant	MODIFIER	TraesCS1A03G0455700.1	-1	TraesCS1A03G0455700	c.-2326_-2325insAAGGATGTAGCCACCTTGCTGAACTGCAGCACAGGAAACCTAGCTTGCAGCAGTAGAAACTCCAGTGG
1A	245681189	386898680	59	0.826	0	-0.826	0.476	121	70	307319418	G	GAGGGTGAACACGTCGTCAGTTGCCATCCGCGCGCAGGCCGCGGCGGTGTCCGCGCCGACCGCGACCCCGGC	INDEL	splice_donor_variant&intron_variant	HIGH	TraesCS1A03G0461300.2	2	TraesCS1A03G0461300	c.144_144+1insAGGGTGAACACGTCGTCAGTTGCCATCCGCGCGCAGGCCGCGGCGGTGTCCGCGCCGACCGCGACCCCGGC
1A	245681189	386898680	59	0.826	0	-0.826	0.476	121	70	307319418	G	GAGGGTGAACACGTCGTCAGTTGCCATCCGCGCGCAGGCCGCGGCGGTGTCCGCGCCGACCGCGACCCCGGC	INDEL	splice_donor_variant&intron_variant	HIGH	TraesCS1A03G0461300.1	2	TraesCS1A03G0461300	c.144_144+1insAGGGTGAACACGTCGTCAGTTGCCATCCGCGCGCAGGCCGCGGCGGTGTCCGCGCCGACCGCGACCCCGGC
1A	245681189	386898680	59	0.923	0	-0.923	0.579	26	31	337379711	C	CAAAGGA	INDEL	splice_acceptor_variant&intron_variant	HIGH	TraesCS1A03G0499400.1	6	TraesCS1A03G0499400	c.1864-2_1864-1insTCCTTT
1A	245681189	386898680	59	0.923	0	-0.923	0.579	26	31	337379711	C	CAAAGGA	INDEL	splice_acceptor_variant&intron_variant	HIGH	TraesCS1A03G0499400.2	6	TraesCS1A03G0499400	c.1861-2_1861-1insTCCTTT
1A	245681189	386898680	59	0.923	0	-0.923	0.579	26	31	337379711	C	CAAAGGA	INDEL	downstream_gene_variant	MODIFIER	TraesCS1A03G0499200.1	-1	TraesCS1A03G0499200	c.*3011_*3012insAAAGGA
1A	245681189	386898680	59	0.923	0	-0.923	0.579	26	31	337379711	C	CAAAGGA	INDEL	downstream_gene_variant	MODIFIER	TraesCS1A03G0499300.1	-1	TraesCS1A03G0499300	c.*341_*342insAAAGGA
1A	245681189	386898680	59	0	0.977	0.977	0.664	84	44	352288198	A	AATTCAAAGAGGGGAGCTTCCAGCCTCCTGAGATATCATCATC	INDEL	splice_region_variant&intron_variant	LOW	TraesCS1A03G0519800.1	2	TraesCS1A03G0519800	c.768+5_768+6insATTCAAAGAGGGGAGCTTCCAGCCTCCTGAGATATCATCATC
1A	245681189	386898680	59	0	0.977	0.977	0.664	84	44	352288198	A	AATTCAAAGAGGGGAGCTTCCAGCCTCCTGAGATATCATCATC	INDEL	downstream_gene_variant	MODIFIER	TraesCS1A03G0519900.1	-1	TraesCS1A03G0519900	c.*2134_*2135insGATGATGATATCTCAGGAGGCTGGAAGCTCCCCTCTTTGAAT
1A	245681189	386898680	59	0.889	0	-0.889	0.5	27	21	357244090	C	CGGTTGAGTTGGTTGAAGGCTTGT	INDEL	splice_acceptor_variant&intron_variant	HIGH	TraesCS1A03G0530200.2	13	TraesCS1A03G0530200	c.1135-2_1135-1insACAAGCCTTCAACCAACTCAACC
1A	245681189	386898680	59	0.889	0	-0.889	0.5	27	21	357244090	C	CGGTTGAGTTGGTTGAAGGCTTGT	INDEL	splice_acceptor_variant&intron_variant	HIGH	TraesCS1A03G0530200.1	12	TraesCS1A03G0530200	c.1036-2_1036-1insACAAGCCTTCAACCAACTCAACC
1A	245681189	386898680	59	0.889	0	-0.889	0.5	27	21	357244090	C	CGGTTGAGTTGGTTGAAGGCTTGT	INDEL	downstream_gene_variant	MODIFIER	TraesCS1A03G0530100LC.1	-1	TraesCS1A03G0530100LC	c.*1689_*1690insGGTTGAGTTGGTTGAAGGCTTGT
1A	245681189	386898680	59	0	0.716	0.716	0.455	21	67	366934392	G	GGCA	INDEL	splice_donor_variant&intron_variant	HIGH	TraesCS1A03G0542400.1	2	TraesCS1A03G0542400	c.386_386+1insGCA
1A	245681189	386898680	59	0	0.821	0.821	0.624	46	39	377886887	TCTGCAACAACAGTGGAATGACATCATCAATACTCCAGAGCATCTATTTCCCATTCTGATCATTTATTTGAGTGGATGCTAGGTATCACAGATCAATGCAAAACCCACTCCCATAGTAGATTTCACAAGAGGAAAGCAGCATGGTTAAAAACCACAAAAGAACATAC	T	INDEL	splice_acceptor_variant&splice_donor_variant&splice_region_variant&intron_variant	HIGH	TraesCS1A03G0560800.1	10	TraesCS1A03G0560800	c.1175+1_1176-1del
1A	245681189	386898680	59	0.979	0	-0.979	0.378	47	27	380698944	G	GAATTCATGAAGCGT	INDEL	downstream_gene_variant	MODIFIER	TraesCS1A03G0565600LC.1	-1	TraesCS1A03G0565600LC	c.*1872_*1873insACGCTTCATGAATT
1A	245681189	386898680	59	0.979	0	-0.979	0.378	47	27	380698944	G	GAATTCATGAAGCGT	INDEL	intergenic_region	MODIFIER	TraesCS1A03G0565500-TraesCS1A03G0565600LC	-1	TraesCS1A03G0565500-TraesCS1A03G0565600LC	n.380698944_380698945insAATTCATGAAGCGT
1A	245681189	386898680	59	0.944	0	-0.944	0.57	36	43	382595198	G	GTTGCAGGAGTCACCGACGTTGCCGCCGCA	INDEL	splice_acceptor_variant&intron_variant	HIGH	TraesCS1A03G0568300.1	1	TraesCS1A03G0568300	c.534-1_534insTGCGGCGGCAACGTCGGTGACTCCTGCAA
1A	245681189	386898680	59	0	0.955	0.955	0.512	21	22	386898680	G	GAACGTCATCCA	INDEL	splice_donor_variant&intron_variant	HIGH	TraesCS1A03G0572400.1	3	TraesCS1A03G0572400	c.335+1_335+2insAACGTCATCCA
1A	245681189	386898680	59	0	0.955	0.955	0.512	21	22	386898680	G	GAACGTCATCCA	INDEL	downstream_gene_variant	MODIFIER	TraesCS1A03G0572300.1	-1	TraesCS1A03G0572300	c.*2912_*2913insAACGTCATCCA
1A	258694259	405302222	33	0	0.771	0.771	0.713	59	35	258694260	T	TGGACA	INDEL	splice_region_variant&intron_variant	LOW	TraesCS1A03G0402100.2	3	TraesCS1A03G0402100	c.525+2_525+3insGGACA
1A	258694259	405302222	33	0	0.771	0.771	0.713	59	35	258694260	T	TGGACA	INDEL	splice_region_variant&intron_variant	LOW	TraesCS1A03G0402100.1	3	TraesCS1A03G0402100	c.513+2_513+3insGGACA
1A	258694259	405302222	33	0	0.771	0.771	0.713	59	35	258694260	T	TGGACA	INDEL	upstream_gene_variant	MODIFIER	TraesCS1A03G0402200.1	-1	TraesCS1A03G0402200	c.-2478_-2477insGGACA
1A	258694259	405302222	33	0	0.771	0.771	0.713	59	35	258694260	T	TGGACA	INDEL	downstream_gene_variant	MODIFIER	TraesCS1A03G0402000.1	-1	TraesCS1A03G0402000	c.*4501_*4502insGGACA
1A	258694259	405302222	33	0.791	0	-0.791	0.575	43	37	263700306	C	CCG	INDEL	splice_acceptor_variant&intron_variant	HIGH	TraesCS1A03G0408100.3	17	TraesCS1A03G0408100	c.2682-2_2682-1insCG
1A	258694259	405302222	33	0.791	0	-0.791	0.575	43	37	263700306	C	CCG	INDEL	splice_acceptor_variant&intron_variant	HIGH	TraesCS1A03G0408100.1	17	TraesCS1A03G0408100	c.2655-2_2655-1insCG
1A	258694259	405302222	33	0.791	0	-0.791	0.575	43	37	263700306	C	CCG	INDEL	splice_acceptor_variant&intron_variant	HIGH	TraesCS1A03G0408100.2	8	TraesCS1A03G0408100	c.1866-2_1866-1insCG
1A	258694259	405302222	33	0.977	0	-0.977	0.323	129	57	274424996	AAGGTGGGTGTCGACGCAACACTCTTACCGCATGGCAGTTTTTTTGGTTTATATATTCTTCCCATGCTTCTACTTGTCAGTCACGCACATGTGTGACCACATTAATTTGTAGCATCTTGCCTAATATTTATTGTATGTCATCTTGC	A	INDEL	frameshift_variant&splice_donor_variant&splice_region_variant&intron_variant	HIGH	TraesCS1A03G0416600.1	6	TraesCS1A03G0416600	c.891_893-3del	p.Gly298fs
1A	258694259	405302222	33	0.977	0	-0.977	0.323	129	57	274424996	AAGGTGGGTGTCGACGCAACACTCTTACCGCATGGCAGTTTTTTTGGTTTATATATTCTTCCCATGCTTCTACTTGTCAGTCACGCACATGTGTGACCACATTAATTTGTAGCATCTTGCCTAATATTTATTGTATGTCATCTTGC	A	INDEL	downstream_gene_variant	MODIFIER	TraesCS1A03G0416500LC.1	-1	TraesCS1A03G0416500LC	c.*5706_*5850del
1A	258694259	405302222	33	0.984	0	-0.984	0.671	124	247	284477545	T	TCGCAAGGCTGCATGCCGAGGATGCTTATAACAGCACTCACAGCCTCGGCCAAGCTCTCCCTAAC	INDEL	splice_region_variant&intron_variant	LOW	TraesCS1A03G0428400.1	17	TraesCS1A03G0428400	c.2476-3_2476-2insGTTAGGGAGAGCTTGGCCGAGGCTGTGAGTGCTGTTATAAGCATCCTCGGCATGCAGCCTTGCG
1A	258694259	405302222	33	0.143	0.778	0.635	0.545	28	27	299622390	CCCTGCAGCAGCATAAACATGTGTGACAGATGATCATGTGCAGTCCAGAAGAGTGTTCAGACACTGGACACCGGGAGGGCAGATTTTGTACAAA	C	INDEL	frameshift_variant&splice_acceptor_variant&splice_donor_variant&splice_region_variant&intron_variant	HIGH	TraesCS1A03G0447800.1	5	TraesCS1A03G0447800	c.312+2_313delTTTGTACAAAATCTGCCCTCCCGGTGTCCAGTGTCTGAACACTCTTCTGGACTGCACATGATCATCTGTCACACATGTTTATGCTGCTGCAGG	p.Gly105fs
1A	258694259	405302222	33	0.914	0	-0.914	0.24	163	33	303504463	C	CCCACTGGAGTTTCTACTGCTGCAAGCTAGGTTTCCTGTGCTGCAGTTCAGCAAGGTGGCTACATCCTT	INDEL	splice_acceptor_variant&intron_variant	HIGH	TraesCS1A03G0455800.1	1	TraesCS1A03G0455800	c.1156-2_1156-1insAAGGATGTAGCCACCTTGCTGAACTGCAGCACAGGAAACCTAGCTTGCAGCAGTAGAAACTCCAGTGG
1A	258694259	405302222	33	0.914	0	-0.914	0.24	163	33	303504463	C	CCCACTGGAGTTTCTACTGCTGCAAGCTAGGTTTCCTGTGCTGCAGTTCAGCAAGGTGGCTACATCCTT	INDEL	upstream_gene_variant	MODIFIER	TraesCS1A03G0455700.1	-1	TraesCS1A03G0455700	c.-2326_-2325insAAGGATGTAGCCACCTTGCTGAACTGCAGCACAGGAAACCTAGCTTGCAGCAGTAGAAACTCCAGTGG
1A	258694259	405302222	33	0.826	0	-0.826	0.476	121	70	307319418	G	GAGGGTGAACACGTCGTCAGTTGCCATCCGCGCGCAGGCCGCGGCGGTGTCCGCGCCGACCGCGACCCCGGC	INDEL	splice_donor_variant&intron_variant	HIGH	TraesCS1A03G0461300.2	2	TraesCS1A03G0461300	c.144_144+1insAGGGTGAACACGTCGTCAGTTGCCATCCGCGCGCAGGCCGCGGCGGTGTCCGCGCCGACCGCGACCCCGGC
1A	258694259	405302222	33	0.826	0	-0.826	0.476	121	70	307319418	G	GAGGGTGAACACGTCGTCAGTTGCCATCCGCGCGCAGGCCGCGGCGGTGTCCGCGCCGACCGCGACCCCGGC	INDEL	splice_donor_variant&intron_variant	HIGH	TraesCS1A03G0461300.1	2	TraesCS1A03G0461300	c.144_144+1insAGGGTGAACACGTCGTCAGTTGCCATCCGCGCGCAGGCCGCGGCGGTGTCCGCGCCGACCGCGACCCCGGC
1A	258694259	405302222	33	0.923	0	-0.923	0.579	26	31	337379711	C	CAAAGGA	INDEL	splice_acceptor_variant&intron_variant	HIGH	TraesCS1A03G0499400.1	6	TraesCS1A03G0499400	c.1864-2_1864-1insTCCTTT
1A	258694259	405302222	33	0.923	0	-0.923	0.579	26	31	337379711	C	CAAAGGA	INDEL	splice_acceptor_variant&intron_variant	HIGH	TraesCS1A03G0499400.2	6	TraesCS1A03G0499400	c.1861-2_1861-1insTCCTTT
1A	258694259	405302222	33	0.923	0	-0.923	0.579	26	31	337379711	C	CAAAGGA	INDEL	downstream_gene_variant	MODIFIER	TraesCS1A03G0499200.1	-1	TraesCS1A03G0499200	c.*3011_*3012insAAAGGA
1A	258694259	405302222	33	0.923	0	-0.923	0.579	26	31	337379711	C	CAAAGGA	INDEL	downstream_gene_variant	MODIFIER	TraesCS1A03G0499300.1	-1	TraesCS1A03G0499300	c.*341_*342insAAAGGA
1A	258694259	405302222	33	0	0.977	0.977	0.664	84	44	352288198	A	AATTCAAAGAGGGGAGCTTCCAGCCTCCTGAGATATCATCATC	INDEL	splice_region_variant&intron_variant	LOW	TraesCS1A03G0519800.1	2	TraesCS1A03G0519800	c.768+5_768+6insATTCAAAGAGGGGAGCTTCCAGCCTCCTGAGATATCATCATC
1A	258694259	405302222	33	0	0.977	0.977	0.664	84	44	352288198	A	AATTCAAAGAGGGGAGCTTCCAGCCTCCTGAGATATCATCATC	INDEL	downstream_gene_variant	MODIFIER	TraesCS1A03G0519900.1	-1	TraesCS1A03G0519900	c.*2134_*2135insGATGATGATATCTCAGGAGGCTGGAAGCTCCCCTCTTTGAAT
1A	258694259	405302222	33	0.889	0	-0.889	0.5	27	21	357244090	C	CGGTTGAGTTGGTTGAAGGCTTGT	INDEL	splice_acceptor_variant&intron_variant	HIGH	TraesCS1A03G0530200.2	13	TraesCS1A03G0530200	c.1135-2_1135-1insACAAGCCTTCAACCAACTCAACC
1A	258694259	405302222	33	0.889	0	-0.889	0.5	27	21	357244090	C	CGGTTGAGTTGGTTGAAGGCTTGT	INDEL	splice_acceptor_variant&intron_variant	HIGH	TraesCS1A03G0530200.1	12	TraesCS1A03G0530200	c.1036-2_1036-1insACAAGCCTTCAACCAACTCAACC
1A	258694259	405302222	33	0.889	0	-0.889	0.5	27	21	357244090	C	CGGTTGAGTTGGTTGAAGGCTTGT	INDEL	downstream_gene_variant	MODIFIER	TraesCS1A03G0530100LC.1	-1	TraesCS1A03G0530100LC	c.*1689_*1690insGGTTGAGTTGGTTGAAGGCTTGT
1A	258694259	405302222	33	0	0.716	0.716	0.455	21	67	366934392	G	GGCA	INDEL	splice_donor_variant&intron_variant	HIGH	TraesCS1A03G0542400.1	2	TraesCS1A03G0542400	c.386_386+1insGCA
1A	258694259	405302222	33	0	0.821	0.821	0.624	46	39	377886887	TCTGCAACAACAGTGGAATGACATCATCAATACTCCAGAGCATCTATTTCCCATTCTGATCATTTATTTGAGTGGATGCTAGGTATCACAGATCAATGCAAAACCCACTCCCATAGTAGATTTCACAAGAGGAAAGCAGCATGGTTAAAAACCACAAAAGAACATAC	T	INDEL	splice_acceptor_variant&splice_donor_variant&splice_region_variant&intron_variant	HIGH	TraesCS1A03G0560800.1	10	TraesCS1A03G0560800	c.1175+1_1176-1del
1A	258694259	405302222	33	0.979	0	-0.979	0.378	47	27	380698944	G	GAATTCATGAAGCGT	INDEL	downstream_gene_variant	MODIFIER	TraesCS1A03G0565600LC.1	-1	TraesCS1A03G0565600LC	c.*1872_*1873insACGCTTCATGAATT
1A	258694259	405302222	33	0.979	0	-0.979	0.378	47	27	380698944	G	GAATTCATGAAGCGT	INDEL	intergenic_region	MODIFIER	TraesCS1A03G0565500-TraesCS1A03G0565600LC	-1	TraesCS1A03G0565500-TraesCS1A03G0565600LC	n.380698944_380698945insAATTCATGAAGCGT
1A	258694259	405302222	33	0.944	0	-0.944	0.57	36	43	382595198	G	GTTGCAGGAGTCACCGACGTTGCCGCCGCA	INDEL	splice_acceptor_variant&intron_variant	HIGH	TraesCS1A03G0568300.1	1	TraesCS1A03G0568300	c.534-1_534insTGCGGCGGCAACGTCGGTGACTCCTGCAA
1A	258694259	405302222	33	0	0.955	0.955	0.512	21	22	386898680	G	GAACGTCATCCA	INDEL	splice_donor_variant&intron_variant	HIGH	TraesCS1A03G0572400.1	3	TraesCS1A03G0572400	c.335+1_335+2insAACGTCATCCA
1A	258694259	405302222	33	0	0.955	0.955	0.512	21	22	386898680	G	GAACGTCATCCA	INDEL	downstream_gene_variant	MODIFIER	TraesCS1A03G0572300.1	-1	TraesCS1A03G0572300	c.*2912_*2913insAACGTCATCCA
1A	258694259	405302222	33	0	0.986	0.986	0.593	101	71	396002323	C	CT	INDEL	splice_acceptor_variant&intron_variant	HIGH	TraesCS1A03G0585900.1	8	TraesCS1A03G0585900	c.932-2_932-1insA
1A	258694259	405302222	33	0	0.986	0.986	0.593	101	71	396002323	C	CT	INDEL	downstream_gene_variant	MODIFIER	TraesCS1A03G0585800.1	-1	TraesCS1A03G0585800	c.*3921_*3922insT
1A	258694259	405302222	33	0	0.986	0.986	0.593	101	71	396002323	C	CT	INDEL	intron_variant	MODIFIER	TraesCS1A03G0585900.2	8	TraesCS1A03G0585900	c.932-82_932-81insA
1A	258694259	405302222	33	0.964	0	-0.964	0.477	83	70	396002324	T	TTGCTTCTCATGTAGAACAGGGTATG	INDEL	splice_region_variant&intron_variant	LOW	TraesCS1A03G0585900.1	8	TraesCS1A03G0585900	c.932-3_932-2insCATACCCTGTTCTACATGAGAAGCA
1A	258694259	405302222	33	0.964	0	-0.964	0.477	83	70	396002324	T	TTGCTTCTCATGTAGAACAGGGTATG	INDEL	downstream_gene_variant	MODIFIER	TraesCS1A03G0585800.1	-1	TraesCS1A03G0585800	c.*3922_*3923insTGCTTCTCATGTAGAACAGGGTATG
1A	258694259	405302222	33	0.964	0	-0.964	0.477	83	70	396002324	T	TTGCTTCTCATGTAGAACAGGGTATG	INDEL	intron_variant	MODIFIER	TraesCS1A03G0585900.2	8	TraesCS1A03G0585900	c.932-83_932-82insCATACCCTGTTCTACATGAGAAGCA
1A	258694259	405302222	33	0	0.96	0.96	0.652	44	25	398154935	G	GATTCTGGCTCAGAGGTCGCTGCTCCCAGTCGCTATTCCGCCGTGTCTTGTTCAAACCAGCTCCTAATATTT	INDEL	splice_region_variant&intron_variant	LOW	TraesCS1A03G0590000.1	9	TraesCS1A03G0590000	c.1534-4_1534-3insAAATATTAGGAGCTGGTTTGAACAAGACACGGCGGAATAGCGACTGGGAGCAGCGACCTCTGAGCCAGAAT
1A	258694259	405302222	33	0	0.96	0.96	0.652	44	25	398154935	G	GATTCTGGCTCAGAGGTCGCTGCTCCCAGTCGCTATTCCGCCGTGTCTTGTTCAAACCAGCTCCTAATATTT	INDEL	downstream_gene_variant	MODIFIER	TraesCS1A03G0590000.3	-1	TraesCS1A03G0590000	c.*1420_*1421insAAATATTAGGAGCTGGTTTGAACAAGACACGGCGGAATAGCGACTGGGAGCAGCGACCTCTGAGCCAGAAT
1A	258694259	405302222	33	0	0.96	0.96	0.652	44	25	398154935	G	GATTCTGGCTCAGAGGTCGCTGCTCCCAGTCGCTATTCCGCCGTGTCTTGTTCAAACCAGCTCCTAATATTT	INDEL	intron_variant	MODIFIER	TraesCS1A03G0590000.2	9	TraesCS1A03G0590000	c.1534-60_1534-59insAAATATTAGGAGCTGGTTTGAACAAGACACGGCGGAATAGCGACTGGGAGCAGCGACCTCTGAGCCAGAAT
1A	258694259	405302222	33	0.718	0	-0.718	0.528	71	37	404675012	TGGTAGGTCATCTCTAACCATGAGTGAACAATAATTATGGCAATGCTATCTGGAATGCGCTTTCTAAAATAGCCGTCTTCCA	T	INDEL	frameshift_variant&splice_acceptor_variant&splice_donor_variant&splice_region_variant&intron_variant	HIGH	TraesCS1A03G0598600.1	5	TraesCS1A03G0598600	c.1017_1018-2delGGTAGGTCATCTCTAACCATGAGTGAACAATAATTATGGCAATGCTATCTGGAATGCGCTTTCTAAAATAGCCGTCTTCCA	p.Val340fs
1A	258694259	405302222	33	0.718	0	-0.718	0.528	71	37	404675012	TGGTAGGTCATCTCTAACCATGAGTGAACAATAATTATGGCAATGCTATCTGGAATGCGCTTTCTAAAATAGCCGTCTTCCA	T	INDEL	upstream_gene_variant	MODIFIER	TraesCS1A03G0598800LC.1	-1	TraesCS1A03G0598800LC	c.-810_-730delGGTAGGTCATCTCTAACCATGAGTGAACAATAATTATGGCAATGCTATCTGGAATGCGCTTTCTAAAATAGCCGTCTTCCA
1A	258694259	405302222	33	0.718	0	-0.718	0.528	71	37	404675012	TGGTAGGTCATCTCTAACCATGAGTGAACAATAATTATGGCAATGCTATCTGGAATGCGCTTTCTAAAATAGCCGTCTTCCA	T	INDEL	downstream_gene_variant	MODIFIER	TraesCS1A03G0598700.1	-1	TraesCS1A03G0598700	c.*778_*858delTGGAAGACGGCTATTTTAGAAAGCGCATTCCAGATAGCATTGCCATAATTATTGTTCACTCATGGTTAGAGATGACCTACC
1A	258694259	405302222	33	0.718	0	-0.718	0.528	71	37	404675012	TGGTAGGTCATCTCTAACCATGAGTGAACAATAATTATGGCAATGCTATCTGGAATGCGCTTTCTAAAATAGCCGTCTTCCA	T	INDEL	downstream_gene_variant	MODIFIER	TraesCS1A03G0598700.2	-1	TraesCS1A03G0598700	c.*778_*858delTGGAAGACGGCTATTTTAGAAAGCGCATTCCAGATAGCATTGCCATAATTATTGTTCACTCATGGTTAGAGATGACCTACC
1A	258694259	405302222	33	0.718	0	-0.718	0.528	71	37	404675012	TGGTAGGTCATCTCTAACCATGAGTGAACAATAATTATGGCAATGCTATCTGGAATGCGCTTTCTAAAATAGCCGTCTTCCA	T	INDEL	downstream_gene_variant	MODIFIER	TraesCS1A03G0598700.3	-1	TraesCS1A03G0598700	c.*778_*858delTGGAAGACGGCTATTTTAGAAAGCGCATTCCAGATAGCATTGCCATAATTATTGTTCACTCATGGTTAGAGATGACCTACC
1A	258694259	405302222	33	0	0.857	0.857	0.649	91	63	405302222	T	TTA	INDEL	splice_region_variant&intron_variant	LOW	TraesCS1A03G0600400.1	16	TraesCS1A03G0600400	c.1834-3_1834-2insTA
1A	303504462	442714854	24	0.914	0	-0.914	0.24	163	33	303504463	C	CCCACTGGAGTTTCTACTGCTGCAAGCTAGGTTTCCTGTGCTGCAGTTCAGCAAGGTGGCTACATCCTT	INDEL	splice_acceptor_variant&intron_variant	HIGH	TraesCS1A03G0455800.1	1	TraesCS1A03G0455800	c.1156-2_1156-1insAAGGATGTAGCCACCTTGCTGAACTGCAGCACAGGAAACCTAGCTTGCAGCAGTAGAAACTCCAGTGG
1A	303504462	442714854	24	0.914	0	-0.914	0.24	163	33	303504463	C	CCCACTGGAGTTTCTACTGCTGCAAGCTAGGTTTCCTGTGCTGCAGTTCAGCAAGGTGGCTACATCCTT	INDEL	upstream_gene_variant	MODIFIER	TraesCS1A03G0455700.1	-1	TraesCS1A03G0455700	c.-2326_-2325insAAGGATGTAGCCACCTTGCTGAACTGCAGCACAGGAAACCTAGCTTGCAGCAGTAGAAACTCCAGTGG
1A	303504462	442714854	24	0.826	0	-0.826	0.476	121	70	307319418	G	GAGGGTGAACACGTCGTCAGTTGCCATCCGCGCGCAGGCCGCGGCGGTGTCCGCGCCGACCGCGACCCCGGC	INDEL	splice_donor_variant&intron_variant	HIGH	TraesCS1A03G0461300.2	2	TraesCS1A03G0461300	c.144_144+1insAGGGTGAACACGTCGTCAGTTGCCATCCGCGCGCAGGCCGCGGCGGTGTCCGCGCCGACCGCGACCCCGGC
1A	303504462	442714854	24	0.826	0	-0.826	0.476	121	70	307319418	G	GAGGGTGAACACGTCGTCAGTTGCCATCCGCGCGCAGGCCGCGGCGGTGTCCGCGCCGACCGCGACCCCGGC	INDEL	splice_donor_variant&intron_variant	HIGH	TraesCS1A03G0461300.1	2	TraesCS1A03G0461300	c.144_144+1insAGGGTGAACACGTCGTCAGTTGCCATCCGCGCGCAGGCCGCGGCGGTGTCCGCGCCGACCGCGACCCCGGC
1A	303504462	442714854	24	0.923	0	-0.923	0.579	26	31	337379711	C	CAAAGGA	INDEL	splice_acceptor_variant&intron_variant	HIGH	TraesCS1A03G0499400.1	6	TraesCS1A03G0499400	c.1864-2_1864-1insTCCTTT
1A	303504462	442714854	24	0.923	0	-0.923	0.579	26	31	337379711	C	CAAAGGA	INDEL	splice_acceptor_variant&intron_variant	HIGH	TraesCS1A03G0499400.2	6	TraesCS1A03G0499400	c.1861-2_1861-1insTCCTTT
1A	303504462	442714854	24	0.923	0	-0.923	0.579	26	31	337379711	C	CAAAGGA	INDEL	downstream_gene_variant	MODIFIER	TraesCS1A03G0499200.1	-1	TraesCS1A03G0499200	c.*3011_*3012insAAAGGA
1A	303504462	442714854	24	0.923	0	-0.923	0.579	26	31	337379711	C	CAAAGGA	INDEL	downstream_gene_variant	MODIFIER	TraesCS1A03G0499300.1	-1	TraesCS1A03G0499300	c.*341_*342insAAAGGA
1A	303504462	442714854	24	0	0.977	0.977	0.664	84	44	352288198	A	AATTCAAAGAGGGGAGCTTCCAGCCTCCTGAGATATCATCATC	INDEL	splice_region_variant&intron_variant	LOW	TraesCS1A03G0519800.1	2	TraesCS1A03G0519800	c.768+5_768+6insATTCAAAGAGGGGAGCTTCCAGCCTCCTGAGATATCATCATC
1A	303504462	442714854	24	0	0.977	0.977	0.664	84	44	352288198	A	AATTCAAAGAGGGGAGCTTCCAGCCTCCTGAGATATCATCATC	INDEL	downstream_gene_variant	MODIFIER	TraesCS1A03G0519900.1	-1	TraesCS1A03G0519900	c.*2134_*2135insGATGATGATATCTCAGGAGGCTGGAAGCTCCCCTCTTTGAAT
1A	303504462	442714854	24	0.889	0	-0.889	0.5	27	21	357244090	C	CGGTTGAGTTGGTTGAAGGCTTGT	INDEL	splice_acceptor_variant&intron_variant	HIGH	TraesCS1A03G0530200.2	13	TraesCS1A03G0530200	c.1135-2_1135-1insACAAGCCTTCAACCAACTCAACC
1A	303504462	442714854	24	0.889	0	-0.889	0.5	27	21	357244090	C	CGGTTGAGTTGGTTGAAGGCTTGT	INDEL	splice_acceptor_variant&intron_variant	HIGH	TraesCS1A03G0530200.1	12	TraesCS1A03G0530200	c.1036-2_1036-1insACAAGCCTTCAACCAACTCAACC
1A	303504462	442714854	24	0.889	0	-0.889	0.5	27	21	357244090	C	CGGTTGAGTTGGTTGAAGGCTTGT	INDEL	downstream_gene_variant	MODIFIER	TraesCS1A03G0530100LC.1	-1	TraesCS1A03G0530100LC	c.*1689_*1690insGGTTGAGTTGGTTGAAGGCTTGT
1A	303504462	442714854	24	0	0.716	0.716	0.455	21	67	366934392	G	GGCA	INDEL	splice_donor_variant&intron_variant	HIGH	TraesCS1A03G0542400.1	2	TraesCS1A03G0542400	c.386_386+1insGCA
1A	303504462	442714854	24	0	0.821	0.821	0.624	46	39	377886887	TCTGCAACAACAGTGGAATGACATCATCAATACTCCAGAGCATCTATTTCCCATTCTGATCATTTATTTGAGTGGATGCTAGGTATCACAGATCAATGCAAAACCCACTCCCATAGTAGATTTCACAAGAGGAAAGCAGCATGGTTAAAAACCACAAAAGAACATAC	T	INDEL	splice_acceptor_variant&splice_donor_variant&splice_region_variant&intron_variant	HIGH	TraesCS1A03G0560800.1	10	TraesCS1A03G0560800	c.1175+1_1176-1del
1A	303504462	442714854	24	0.979	0	-0.979	0.378	47	27	380698944	G	GAATTCATGAAGCGT	INDEL	downstream_gene_variant	MODIFIER	TraesCS1A03G0565600LC.1	-1	TraesCS1A03G0565600LC	c.*1872_*1873insACGCTTCATGAATT
1A	303504462	442714854	24	0.979	0	-0.979	0.378	47	27	380698944	G	GAATTCATGAAGCGT	INDEL	intergenic_region	MODIFIER	TraesCS1A03G0565500-TraesCS1A03G0565600LC	-1	TraesCS1A03G0565500-TraesCS1A03G0565600LC	n.380698944_380698945insAATTCATGAAGCGT
1A	303504462	442714854	24	0.944	0	-0.944	0.57	36	43	382595198	G	GTTGCAGGAGTCACCGACGTTGCCGCCGCA	INDEL	splice_acceptor_variant&intron_variant	HIGH	TraesCS1A03G0568300.1	1	TraesCS1A03G0568300	c.534-1_534insTGCGGCGGCAACGTCGGTGACTCCTGCAA
1A	303504462	442714854	24	0	0.955	0.955	0.512	21	22	386898680	G	GAACGTCATCCA	INDEL	splice_donor_variant&intron_variant	HIGH	TraesCS1A03G0572400.1	3	TraesCS1A03G0572400	c.335+1_335+2insAACGTCATCCA
1A	303504462	442714854	24	0	0.955	0.955	0.512	21	22	386898680	G	GAACGTCATCCA	INDEL	downstream_gene_variant	MODIFIER	TraesCS1A03G0572300.1	-1	TraesCS1A03G0572300	c.*2912_*2913insAACGTCATCCA
1A	303504462	442714854	24	0	0.986	0.986	0.593	101	71	396002323	C	CT	INDEL	splice_acceptor_variant&intron_variant	HIGH	TraesCS1A03G0585900.1	8	TraesCS1A03G0585900	c.932-2_932-1insA
1A	303504462	442714854	24	0	0.986	0.986	0.593	101	71	396002323	C	CT	INDEL	downstream_gene_variant	MODIFIER	TraesCS1A03G0585800.1	-1	TraesCS1A03G0585800	c.*3921_*3922insT
1A	303504462	442714854	24	0	0.986	0.986	0.593	101	71	396002323	C	CT	INDEL	intron_variant	MODIFIER	TraesCS1A03G0585900.2	8	TraesCS1A03G0585900	c.932-82_932-81insA
1A	303504462	442714854	24	0.964	0	-0.964	0.477	83	70	396002324	T	TTGCTTCTCATGTAGAACAGGGTATG	INDEL	splice_region_variant&intron_variant	LOW	TraesCS1A03G0585900.1	8	TraesCS1A03G0585900	c.932-3_932-2insCATACCCTGTTCTACATGAGAAGCA
1A	303504462	442714854	24	0.964	0	-0.964	0.477	83	70	396002324	T	TTGCTTCTCATGTAGAACAGGGTATG	INDEL	downstream_gene_variant	MODIFIER	TraesCS1A03G0585800.1	-1	TraesCS1A03G0585800	c.*3922_*3923insTGCTTCTCATGTAGAACAGGGTATG
1A	303504462	442714854	24	0.964	0	-0.964	0.477	83	70	396002324	T	TTGCTTCTCATGTAGAACAGGGTATG	INDEL	intron_variant	MODIFIER	TraesCS1A03G0585900.2	8	TraesCS1A03G0585900	c.932-83_932-82insCATACCCTGTTCTACATGAGAAGCA
1A	303504462	442714854	24	0	0.96	0.96	0.652	44	25	398154935	G	GATTCTGGCTCAGAGGTCGCTGCTCCCAGTCGCTATTCCGCCGTGTCTTGTTCAAACCAGCTCCTAATATTT	INDEL	splice_region_variant&intron_variant	LOW	TraesCS1A03G0590000.1	9	TraesCS1A03G0590000	c.1534-4_1534-3insAAATATTAGGAGCTGGTTTGAACAAGACACGGCGGAATAGCGACTGGGAGCAGCGACCTCTGAGCCAGAAT
1A	303504462	442714854	24	0	0.96	0.96	0.652	44	25	398154935	G	GATTCTGGCTCAGAGGTCGCTGCTCCCAGTCGCTATTCCGCCGTGTCTTGTTCAAACCAGCTCCTAATATTT	INDEL	downstream_gene_variant	MODIFIER	TraesCS1A03G0590000.3	-1	TraesCS1A03G0590000	c.*1420_*1421insAAATATTAGGAGCTGGTTTGAACAAGACACGGCGGAATAGCGACTGGGAGCAGCGACCTCTGAGCCAGAAT
1A	303504462	442714854	24	0	0.96	0.96	0.652	44	25	398154935	G	GATTCTGGCTCAGAGGTCGCTGCTCCCAGTCGCTATTCCGCCGTGTCTTGTTCAAACCAGCTCCTAATATTT	INDEL	intron_variant	MODIFIER	TraesCS1A03G0590000.2	9	TraesCS1A03G0590000	c.1534-60_1534-59insAAATATTAGGAGCTGGTTTGAACAAGACACGGCGGAATAGCGACTGGGAGCAGCGACCTCTGAGCCAGAAT
1A	303504462	442714854	24	0.718	0	-0.718	0.528	71	37	404675012	TGGTAGGTCATCTCTAACCATGAGTGAACAATAATTATGGCAATGCTATCTGGAATGCGCTTTCTAAAATAGCCGTCTTCCA	T	INDEL	frameshift_variant&splice_acceptor_variant&splice_donor_variant&splice_region_variant&intron_variant	HIGH	TraesCS1A03G0598600.1	5	TraesCS1A03G0598600	c.1017_1018-2delGGTAGGTCATCTCTAACCATGAGTGAACAATAATTATGGCAATGCTATCTGGAATGCGCTTTCTAAAATAGCCGTCTTCCA	p.Val340fs
1A	303504462	442714854	24	0.718	0	-0.718	0.528	71	37	404675012	TGGTAGGTCATCTCTAACCATGAGTGAACAATAATTATGGCAATGCTATCTGGAATGCGCTTTCTAAAATAGCCGTCTTCCA	T	INDEL	upstream_gene_variant	MODIFIER	TraesCS1A03G0598800LC.1	-1	TraesCS1A03G0598800LC	c.-810_-730delGGTAGGTCATCTCTAACCATGAGTGAACAATAATTATGGCAATGCTATCTGGAATGCGCTTTCTAAAATAGCCGTCTTCCA
1A	303504462	442714854	24	0.718	0	-0.718	0.528	71	37	404675012	TGGTAGGTCATCTCTAACCATGAGTGAACAATAATTATGGCAATGCTATCTGGAATGCGCTTTCTAAAATAGCCGTCTTCCA	T	INDEL	downstream_gene_variant	MODIFIER	TraesCS1A03G0598700.1	-1	TraesCS1A03G0598700	c.*778_*858delTGGAAGACGGCTATTTTAGAAAGCGCATTCCAGATAGCATTGCCATAATTATTGTTCACTCATGGTTAGAGATGACCTACC
1A	303504462	442714854	24	0.718	0	-0.718	0.528	71	37	404675012	TGGTAGGTCATCTCTAACCATGAGTGAACAATAATTATGGCAATGCTATCTGGAATGCGCTTTCTAAAATAGCCGTCTTCCA	T	INDEL	downstream_gene_variant	MODIFIER	TraesCS1A03G0598700.2	-1	TraesCS1A03G0598700	c.*778_*858delTGGAAGACGGCTATTTTAGAAAGCGCATTCCAGATAGCATTGCCATAATTATTGTTCACTCATGGTTAGAGATGACCTACC
1A	303504462	442714854	24	0.718	0	-0.718	0.528	71	37	404675012	TGGTAGGTCATCTCTAACCATGAGTGAACAATAATTATGGCAATGCTATCTGGAATGCGCTTTCTAAAATAGCCGTCTTCCA	T	INDEL	downstream_gene_variant	MODIFIER	TraesCS1A03G0598700.3	-1	TraesCS1A03G0598700	c.*778_*858delTGGAAGACGGCTATTTTAGAAAGCGCATTCCAGATAGCATTGCCATAATTATTGTTCACTCATGGTTAGAGATGACCTACC
1A	303504462	442714854	24	0	0.857	0.857	0.649	91	63	405302222	T	TTA	INDEL	splice_region_variant&intron_variant	LOW	TraesCS1A03G0600400.1	16	TraesCS1A03G0600400	c.1834-3_1834-2insTA
1A	303504462	442714854	24	0	0.817	0.817	0.564	62	71	427100486	T	TCCCCATGCCCCTGTATCTGCCCTCGAAGCCGGGTTCCGCGAGCTAAGGTTGCAGGGG	INDEL	splice_region_variant&intron_variant	LOW	TraesCS1A03G0621000LC.1	4	TraesCS1A03G0621000LC	c.306+2_306+3insCCCCATGCCCCTGTATCTGCCCTCGAAGCCGGGTTCCGCGAGCTAAGGTTGCAGGGG
1A	303504462	442714854	24	0	0.817	0.817	0.564	62	71	427100486	T	TCCCCATGCCCCTGTATCTGCCCTCGAAGCCGGGTTCCGCGAGCTAAGGTTGCAGGGG	INDEL	downstream_gene_variant	MODIFIER	TraesCS1A03G0621100.1	-1	TraesCS1A03G0621100	c.*3863_*3864insCCCCTGCAACCTTAGCTCGCGGAACCCGGCTTCGAGGGCAGATACAGGGGCATGGGG
1A	303504462	442714854	24	0	0.817	0.817	0.564	62	71	427100486	T	TCCCCATGCCCCTGTATCTGCCCTCGAAGCCGGGTTCCGCGAGCTAAGGTTGCAGGGG	INDEL	downstream_gene_variant	MODIFIER	TraesCS1A03G0621200.1	-1	TraesCS1A03G0621200	c.*4618_*4619insCCCCTGCAACCTTAGCTCGCGGAACCCGGCTTCGAGGGCAGATACAGGGGCATGGGG
1A	303504462	442714854	24	0	1	1	0.521	25	23	428739704	C	CGGCGATGATGTCGCGGTCGCA	INDEL	splice_acceptor_variant&intron_variant	HIGH	TraesCS1A03G0623400.1	1	TraesCS1A03G0623400	c.94-1_94insTGCGACCGCGACATCATCGCC
1A	303504462	442714854	24	0	1	1	0.521	25	23	428739704	C	CGGCGATGATGTCGCGGTCGCA	INDEL	downstream_gene_variant	MODIFIER	TraesCS1A03G0623300.1	-1	TraesCS1A03G0623300	c.*2205_*2206insGGCGATGATGTCGCGGTCGCA
1A	303504462	442714854	24	0	1	1	0.521	25	23	428739704	C	CGGCGATGATGTCGCGGTCGCA	INDEL	downstream_gene_variant	MODIFIER	TraesCS1A03G0623300.2	-1	TraesCS1A03G0623300	c.*2205_*2206insGGCGATGATGTCGCGGTCGCA
1A	303504462	442714854	24	0	0.773	0.773	0.667	29	22	432447436	G	GACTGCGGCAGAATATGAGCGAAGGA	INDEL	splice_donor_variant&intron_variant	HIGH	TraesCS1A03G0628300.1	1	TraesCS1A03G0628300	c.552_552+1insACTGCGGCAGAATATGAGCGAAGGA
1A	303504462	442714854	24	1	0	-1	0.478	36	33	440139635	G	GATGGAGAAAGGCAAACTTGACAAAGGA	INDEL	splice_donor_variant&intron_variant	HIGH	TraesCS1A03G0638500.1	6	TraesCS1A03G0638500	c.507_507+1insATGGAGAAAGGCAAACTTGACAAAGGA
1A	303504462	442714854	24	1	0	-1	0.478	36	33	440139635	G	GATGGAGAAAGGCAAACTTGACAAAGGA	INDEL	upstream_gene_variant	MODIFIER	TraesCS1A03G0638600LC.1	-1	TraesCS1A03G0638600LC	c.-4273_-4272insATGGAGAAAGGCAAACTTGACAAAGGA
1A	303504462	442714854	24	0	1	1	0.672	45	22	442714854	T	TCCAATGTGTGGGTTCTGTATGCTTTCCAGTCAACGATTCCTCCAAACTTGGTGACA	INDEL	splice_region_variant&intron_variant	LOW	TraesCS1A03G0644400.1	2	TraesCS1A03G0644400	c.529-3_529-2insTGTCACCAAGTTTGGAGGAATCGTTGACTGGAAAGCATACAGAACCCACACATTGG
1A	366934391	454223235	20	0	0.716	0.716	0.455	21	67	366934392	G	GGCA	INDEL	splice_donor_variant&intron_variant	HIGH	TraesCS1A03G0542400.1	2	TraesCS1A03G0542400	c.386_386+1insGCA
1A	366934391	454223235	20	0	0.821	0.821	0.624	46	39	377886887	TCTGCAACAACAGTGGAATGACATCATCAATACTCCAGAGCATCTATTTCCCATTCTGATCATTTATTTGAGTGGATGCTAGGTATCACAGATCAATGCAAAACCCACTCCCATAGTAGATTTCACAAGAGGAAAGCAGCATGGTTAAAAACCACAAAAGAACATAC	T	INDEL	splice_acceptor_variant&splice_donor_variant&splice_region_variant&intron_variant	HIGH	TraesCS1A03G0560800.1	10	TraesCS1A03G0560800	c.1175+1_1176-1del
1A	366934391	454223235	20	0.979	0	-0.979	0.378	47	27	380698944	G	GAATTCATGAAGCGT	INDEL	downstream_gene_variant	MODIFIER	TraesCS1A03G0565600LC.1	-1	TraesCS1A03G0565600LC	c.*1872_*1873insACGCTTCATGAATT
1A	366934391	454223235	20	0.979	0	-0.979	0.378	47	27	380698944	G	GAATTCATGAAGCGT	INDEL	intergenic_region	MODIFIER	TraesCS1A03G0565500-TraesCS1A03G0565600LC	-1	TraesCS1A03G0565500-TraesCS1A03G0565600LC	n.380698944_380698945insAATTCATGAAGCGT
1A	366934391	454223235	20	0.944	0	-0.944	0.57	36	43	382595198	G	GTTGCAGGAGTCACCGACGTTGCCGCCGCA	INDEL	splice_acceptor_variant&intron_variant	HIGH	TraesCS1A03G0568300.1	1	TraesCS1A03G0568300	c.534-1_534insTGCGGCGGCAACGTCGGTGACTCCTGCAA
1A	366934391	454223235	20	0	0.955	0.955	0.512	21	22	386898680	G	GAACGTCATCCA	INDEL	splice_donor_variant&intron_variant	HIGH	TraesCS1A03G0572400.1	3	TraesCS1A03G0572400	c.335+1_335+2insAACGTCATCCA
1A	366934391	454223235	20	0	0.955	0.955	0.512	21	22	386898680	G	GAACGTCATCCA	INDEL	downstream_gene_variant	MODIFIER	TraesCS1A03G0572300.1	-1	TraesCS1A03G0572300	c.*2912_*2913insAACGTCATCCA
1A	366934391	454223235	20	0	0.986	0.986	0.593	101	71	396002323	C	CT	INDEL	splice_acceptor_variant&intron_variant	HIGH	TraesCS1A03G0585900.1	8	TraesCS1A03G0585900	c.932-2_932-1insA
1A	366934391	454223235	20	0	0.986	0.986	0.593	101	71	396002323	C	CT	INDEL	downstream_gene_variant	MODIFIER	TraesCS1A03G0585800.1	-1	TraesCS1A03G0585800	c.*3921_*3922insT
1A	366934391	454223235	20	0	0.986	0.986	0.593	101	71	396002323	C	CT	INDEL	intron_variant	MODIFIER	TraesCS1A03G0585900.2	8	TraesCS1A03G0585900	c.932-82_932-81insA
1A	366934391	454223235	20	0.964	0	-0.964	0.477	83	70	396002324	T	TTGCTTCTCATGTAGAACAGGGTATG	INDEL	splice_region_variant&intron_variant	LOW	TraesCS1A03G0585900.1	8	TraesCS1A03G0585900	c.932-3_932-2insCATACCCTGTTCTACATGAGAAGCA
1A	366934391	454223235	20	0.964	0	-0.964	0.477	83	70	396002324	T	TTGCTTCTCATGTAGAACAGGGTATG	INDEL	downstream_gene_variant	MODIFIER	TraesCS1A03G0585800.1	-1	TraesCS1A03G0585800	c.*3922_*3923insTGCTTCTCATGTAGAACAGGGTATG
1A	366934391	454223235	20	0.964	0	-0.964	0.477	83	70	396002324	T	TTGCTTCTCATGTAGAACAGGGTATG	INDEL	intron_variant	MODIFIER	TraesCS1A03G0585900.2	8	TraesCS1A03G0585900	c.932-83_932-82insCATACCCTGTTCTACATGAGAAGCA
1A	366934391	454223235	20	0	0.96	0.96	0.652	44	25	398154935	G	GATTCTGGCTCAGAGGTCGCTGCTCCCAGTCGCTATTCCGCCGTGTCTTGTTCAAACCAGCTCCTAATATTT	INDEL	splice_region_variant&intron_variant	LOW	TraesCS1A03G0590000.1	9	TraesCS1A03G0590000	c.1534-4_1534-3insAAATATTAGGAGCTGGTTTGAACAAGACACGGCGGAATAGCGACTGGGAGCAGCGACCTCTGAGCCAGAAT
1A	366934391	454223235	20	0	0.96	0.96	0.652	44	25	398154935	G	GATTCTGGCTCAGAGGTCGCTGCTCCCAGTCGCTATTCCGCCGTGTCTTGTTCAAACCAGCTCCTAATATTT	INDEL	downstream_gene_variant	MODIFIER	TraesCS1A03G0590000.3	-1	TraesCS1A03G0590000	c.*1420_*1421insAAATATTAGGAGCTGGTTTGAACAAGACACGGCGGAATAGCGACTGGGAGCAGCGACCTCTGAGCCAGAAT
1A	366934391	454223235	20	0	0.96	0.96	0.652	44	25	398154935	G	GATTCTGGCTCAGAGGTCGCTGCTCCCAGTCGCTATTCCGCCGTGTCTTGTTCAAACCAGCTCCTAATATTT	INDEL	intron_variant	MODIFIER	TraesCS1A03G0590000.2	9	TraesCS1A03G0590000	c.1534-60_1534-59insAAATATTAGGAGCTGGTTTGAACAAGACACGGCGGAATAGCGACTGGGAGCAGCGACCTCTGAGCCAGAAT
1A	366934391	454223235	20	0.718	0	-0.718	0.528	71	37	404675012	TGGTAGGTCATCTCTAACCATGAGTGAACAATAATTATGGCAATGCTATCTGGAATGCGCTTTCTAAAATAGCCGTCTTCCA	T	INDEL	frameshift_variant&splice_acceptor_variant&splice_donor_variant&splice_region_variant&intron_variant	HIGH	TraesCS1A03G0598600.1	5	TraesCS1A03G0598600	c.1017_1018-2delGGTAGGTCATCTCTAACCATGAGTGAACAATAATTATGGCAATGCTATCTGGAATGCGCTTTCTAAAATAGCCGTCTTCCA	p.Val340fs
1A	366934391	454223235	20	0.718	0	-0.718	0.528	71	37	404675012	TGGTAGGTCATCTCTAACCATGAGTGAACAATAATTATGGCAATGCTATCTGGAATGCGCTTTCTAAAATAGCCGTCTTCCA	T	INDEL	upstream_gene_variant	MODIFIER	TraesCS1A03G0598800LC.1	-1	TraesCS1A03G0598800LC	c.-810_-730delGGTAGGTCATCTCTAACCATGAGTGAACAATAATTATGGCAATGCTATCTGGAATGCGCTTTCTAAAATAGCCGTCTTCCA
1A	366934391	454223235	20	0.718	0	-0.718	0.528	71	37	404675012	TGGTAGGTCATCTCTAACCATGAGTGAACAATAATTATGGCAATGCTATCTGGAATGCGCTTTCTAAAATAGCCGTCTTCCA	T	INDEL	downstream_gene_variant	MODIFIER	TraesCS1A03G0598700.1	-1	TraesCS1A03G0598700	c.*778_*858delTGGAAGACGGCTATTTTAGAAAGCGCATTCCAGATAGCATTGCCATAATTATTGTTCACTCATGGTTAGAGATGACCTACC
1A	366934391	454223235	20	0.718	0	-0.718	0.528	71	37	404675012	TGGTAGGTCATCTCTAACCATGAGTGAACAATAATTATGGCAATGCTATCTGGAATGCGCTTTCTAAAATAGCCGTCTTCCA	T	INDEL	downstream_gene_variant	MODIFIER	TraesCS1A03G0598700.2	-1	TraesCS1A03G0598700	c.*778_*858delTGGAAGACGGCTATTTTAGAAAGCGCATTCCAGATAGCATTGCCATAATTATTGTTCACTCATGGTTAGAGATGACCTACC
1A	366934391	454223235	20	0.718	0	-0.718	0.528	71	37	404675012	TGGTAGGTCATCTCTAACCATGAGTGAACAATAATTATGGCAATGCTATCTGGAATGCGCTTTCTAAAATAGCCGTCTTCCA	T	INDEL	downstream_gene_variant	MODIFIER	TraesCS1A03G0598700.3	-1	TraesCS1A03G0598700	c.*778_*858delTGGAAGACGGCTATTTTAGAAAGCGCATTCCAGATAGCATTGCCATAATTATTGTTCACTCATGGTTAGAGATGACCTACC
1A	366934391	454223235	20	0	0.857	0.857	0.649	91	63	405302222	T	TTA	INDEL	splice_region_variant&intron_variant	LOW	TraesCS1A03G0600400.1	16	TraesCS1A03G0600400	c.1834-3_1834-2insTA
1A	366934391	454223235	20	0	0.817	0.817	0.564	62	71	427100486	T	TCCCCATGCCCCTGTATCTGCCCTCGAAGCCGGGTTCCGCGAGCTAAGGTTGCAGGGG	INDEL	splice_region_variant&intron_variant	LOW	TraesCS1A03G0621000LC.1	4	TraesCS1A03G0621000LC	c.306+2_306+3insCCCCATGCCCCTGTATCTGCCCTCGAAGCCGGGTTCCGCGAGCTAAGGTTGCAGGGG
1A	366934391	454223235	20	0	0.817	0.817	0.564	62	71	427100486	T	TCCCCATGCCCCTGTATCTGCCCTCGAAGCCGGGTTCCGCGAGCTAAGGTTGCAGGGG	INDEL	downstream_gene_variant	MODIFIER	TraesCS1A03G0621100.1	-1	TraesCS1A03G0621100	c.*3863_*3864insCCCCTGCAACCTTAGCTCGCGGAACCCGGCTTCGAGGGCAGATACAGGGGCATGGGG
1A	366934391	454223235	20	0	0.817	0.817	0.564	62	71	427100486	T	TCCCCATGCCCCTGTATCTGCCCTCGAAGCCGGGTTCCGCGAGCTAAGGTTGCAGGGG	INDEL	downstream_gene_variant	MODIFIER	TraesCS1A03G0621200.1	-1	TraesCS1A03G0621200	c.*4618_*4619insCCCCTGCAACCTTAGCTCGCGGAACCCGGCTTCGAGGGCAGATACAGGGGCATGGGG
1A	366934391	454223235	20	0	1	1	0.521	25	23	428739704	C	CGGCGATGATGTCGCGGTCGCA	INDEL	splice_acceptor_variant&intron_variant	HIGH	TraesCS1A03G0623400.1	1	TraesCS1A03G0623400	c.94-1_94insTGCGACCGCGACATCATCGCC
1A	366934391	454223235	20	0	1	1	0.521	25	23	428739704	C	CGGCGATGATGTCGCGGTCGCA	INDEL	downstream_gene_variant	MODIFIER	TraesCS1A03G0623300.1	-1	TraesCS1A03G0623300	c.*2205_*2206insGGCGATGATGTCGCGGTCGCA
1A	366934391	454223235	20	0	1	1	0.521	25	23	428739704	C	CGGCGATGATGTCGCGGTCGCA	INDEL	downstream_gene_variant	MODIFIER	TraesCS1A03G0623300.2	-1	TraesCS1A03G0623300	c.*2205_*2206insGGCGATGATGTCGCGGTCGCA
1A	366934391	454223235	20	0	0.773	0.773	0.667	29	22	432447436	G	GACTGCGGCAGAATATGAGCGAAGGA	INDEL	splice_donor_variant&intron_variant	HIGH	TraesCS1A03G0628300.1	1	TraesCS1A03G0628300	c.552_552+1insACTGCGGCAGAATATGAGCGAAGGA
1A	366934391	454223235	20	1	0	-1	0.478	36	33	440139635	G	GATGGAGAAAGGCAAACTTGACAAAGGA	INDEL	splice_donor_variant&intron_variant	HIGH	TraesCS1A03G0638500.1	6	TraesCS1A03G0638500	c.507_507+1insATGGAGAAAGGCAAACTTGACAAAGGA
1A	366934391	454223235	20	1	0	-1	0.478	36	33	440139635	G	GATGGAGAAAGGCAAACTTGACAAAGGA	INDEL	upstream_gene_variant	MODIFIER	TraesCS1A03G0638600LC.1	-1	TraesCS1A03G0638600LC	c.-4273_-4272insATGGAGAAAGGCAAACTTGACAAAGGA
1A	366934391	454223235	20	0	1	1	0.672	45	22	442714854	T	TCCAATGTGTGGGTTCTGTATGCTTTCCAGTCAACGATTCCTCCAAACTTGGTGACA	INDEL	splice_region_variant&intron_variant	LOW	TraesCS1A03G0644400.1	2	TraesCS1A03G0644400	c.529-3_529-2insTGTCACCAAGTTTGGAGGAATCGTTGACTGGAAAGCATACAGAACCCACACATTGG
1A	366934391	454223235	20	0.952	0	-0.952	0.579	42	53	444383229	A	AAATTTCTGTTGCGTCAACACGAGTGC	INDEL	splice_acceptor_variant&intron_variant	HIGH	TraesCS1A03G0648000.1	5	TraesCS1A03G0648000	c.469-1_469insGCACTCGTGTTGACGCAACAGAAATT
1A	366934391	454223235	20	0.952	0	-0.952	0.579	42	53	444383229	A	AAATTTCTGTTGCGTCAACACGAGTGC	INDEL	upstream_gene_variant	MODIFIER	TraesCS1A03G0648100.1	-1	TraesCS1A03G0648100	c.-2613_-2612insAATTTCTGTTGCGTCAACACGAGTGC
1A	366934391	454223235	20	0.952	0	-0.952	0.579	42	53	444383229	A	AAATTTCTGTTGCGTCAACACGAGTGC	INDEL	downstream_gene_variant	MODIFIER	TraesCS1A03G0647900.1	-1	TraesCS1A03G0647900	c.*847_*848insAATTTCTGTTGCGTCAACACGAGTGC
1A	366934391	454223235	20	0.953	0	-0.953	0.27	85	26	447070098	CACCTTTACATTCAGAAAGTTCAAAAAGTATCAGGATAACTCAAGAATAGGACAAGTCCAACCCAAAAGGACATAGGAAAATGAAGGAGACATCCTGCTATAAAAAAAAGGAGGATGATAAGGACATGTACAG	C	INDEL	frameshift_variant&splice_acceptor_variant&splice_region_variant&intron_variant	HIGH	TraesCS1A03G0652400.1	10	TraesCS1A03G0652400	c.1614+3_1616del	p.Val539fs
1A	366934391	454223235	20	0.953	0	-0.953	0.27	85	26	447070098	CACCTTTACATTCAGAAAGTTCAAAAAGTATCAGGATAACTCAAGAATAGGACAAGTCCAACCCAAAAGGACATAGGAAAATGAAGGAGACATCCTGCTATAAAAAAAAGGAGGATGATAAGGACATGTACAG	C	INDEL	frameshift_variant&splice_acceptor_variant&splice_region_variant&intron_variant	HIGH	TraesCS1A03G0652400.2	7	TraesCS1A03G0652400	c.1194+3_1196del	p.Val399fs
1A	366934391	454223235	20	0.953	0	-0.953	0.27	85	26	447070098	CACCTTTACATTCAGAAAGTTCAAAAAGTATCAGGATAACTCAAGAATAGGACAAGTCCAACCCAAAAGGACATAGGAAAATGAAGGAGACATCCTGCTATAAAAAAAAGGAGGATGATAAGGACATGTACAG	C	INDEL	frameshift_variant&splice_acceptor_variant&splice_region_variant&intron_variant	HIGH	TraesCS1A03G0652400.3	8	TraesCS1A03G0652400	c.1311+3_1313del	p.Val438fs
1A	366934391	454223235	20	0.951	0	-0.951	0.519	41	40	451341708	CTAGGTAGGTCAGCCCATAATAATCAGCAAGCGTCTCTGTCCCATCCATTTCGTTCTCTGAATCCGTGACTTGACACCCGGGCCGCCGGGCTGAAGCGTTGAATGTTCCTTCAAAACTGATGCTGAGATGAGATGGTTGGCTGTG	C	INDEL	splice_donor_variant&disruptive_inframe_deletion&splice_region_variant&intron_variant	HIGH	TraesCS1A03G0660000.1	4	TraesCS1A03G0660000	c.848_851-4del	p.Leu283_Gly284delinsArg
1A	366934391	454223235	20	0.893	0	-0.893	0.627	28	39	451341978	T	TTGAGCAACGTCGTCCAGGAACAGCAGGAGCAGCAGCAGCAGGGGAGCAG	INDEL	intron_variant	MODIFIER	TraesCS1A03G0660000.1	5	TraesCS1A03G0660000	c.964+9_964+10insTGAGCAACGTCGTCCAGGAACAGCAGGAGCAGCAGCAGCAGGGGAGCAG
1A	366934391	454223235	20	0.933	0	-0.933	0.464	119	88	454223235	T	TTTTTCTAATGGGGGAAACAAGCCTCAAAGAATCAATAGTTCTGCATCCTTTGATGTTCTTCTCAGCTTCAG	INDEL	downstream_gene_variant	MODIFIER	TraesCS1A03G0663800.1	-1	TraesCS1A03G0663800	c.*393_*394insCTGAAGCTGAGAAGAACATCAAAGGATGCAGAACTATTGATTCTTTGAGGCTTGTTTCCCCCATTAGAAAA
1A	366934391	454223235	20	0.933	0	-0.933	0.464	119	88	454223235	T	TTTTTCTAATGGGGGAAACAAGCCTCAAAGAATCAATAGTTCTGCATCCTTTGATGTTCTTCTCAGCTTCAG	INDEL	intergenic_region	MODIFIER	TraesCS1A03G0663700LC-TraesCS1A03G0663800	-1	TraesCS1A03G0663700LC-TraesCS1A03G0663800	n.454223235_454223236insTTTTCTAATGGGGGAAACAAGCCTCAAAGAATCAATAGTTCTGCATCCTTTGATGTTCTTCTCAGCTTCAG
1A	396002322	464950019	26	0	0.986	0.986	0.593	101	71	396002323	C	CT	INDEL	splice_acceptor_variant&intron_variant	HIGH	TraesCS1A03G0585900.1	8	TraesCS1A03G0585900	c.932-2_932-1insA
1A	396002322	464950019	26	0	0.986	0.986	0.593	101	71	396002323	C	CT	INDEL	downstream_gene_variant	MODIFIER	TraesCS1A03G0585800.1	-1	TraesCS1A03G0585800	c.*3921_*3922insT
1A	396002322	464950019	26	0	0.986	0.986	0.593	101	71	396002323	C	CT	INDEL	intron_variant	MODIFIER	TraesCS1A03G0585900.2	8	TraesCS1A03G0585900	c.932-82_932-81insA
1A	396002322	464950019	26	0.964	0	-0.964	0.477	83	70	396002324	T	TTGCTTCTCATGTAGAACAGGGTATG	INDEL	splice_region_variant&intron_variant	LOW	TraesCS1A03G0585900.1	8	TraesCS1A03G0585900	c.932-3_932-2insCATACCCTGTTCTACATGAGAAGCA
1A	396002322	464950019	26	0.964	0	-0.964	0.477	83	70	396002324	T	TTGCTTCTCATGTAGAACAGGGTATG	INDEL	downstream_gene_variant	MODIFIER	TraesCS1A03G0585800.1	-1	TraesCS1A03G0585800	c.*3922_*3923insTGCTTCTCATGTAGAACAGGGTATG
1A	396002322	464950019	26	0.964	0	-0.964	0.477	83	70	396002324	T	TTGCTTCTCATGTAGAACAGGGTATG	INDEL	intron_variant	MODIFIER	TraesCS1A03G0585900.2	8	TraesCS1A03G0585900	c.932-83_932-82insCATACCCTGTTCTACATGAGAAGCA
1A	396002322	464950019	26	0	0.96	0.96	0.652	44	25	398154935	G	GATTCTGGCTCAGAGGTCGCTGCTCCCAGTCGCTATTCCGCCGTGTCTTGTTCAAACCAGCTCCTAATATTT	INDEL	splice_region_variant&intron_variant	LOW	TraesCS1A03G0590000.1	9	TraesCS1A03G0590000	c.1534-4_1534-3insAAATATTAGGAGCTGGTTTGAACAAGACACGGCGGAATAGCGACTGGGAGCAGCGACCTCTGAGCCAGAAT
1A	396002322	464950019	26	0	0.96	0.96	0.652	44	25	398154935	G	GATTCTGGCTCAGAGGTCGCTGCTCCCAGTCGCTATTCCGCCGTGTCTTGTTCAAACCAGCTCCTAATATTT	INDEL	downstream_gene_variant	MODIFIER	TraesCS1A03G0590000.3	-1	TraesCS1A03G0590000	c.*1420_*1421insAAATATTAGGAGCTGGTTTGAACAAGACACGGCGGAATAGCGACTGGGAGCAGCGACCTCTGAGCCAGAAT
1A	396002322	464950019	26	0	0.96	0.96	0.652	44	25	398154935	G	GATTCTGGCTCAGAGGTCGCTGCTCCCAGTCGCTATTCCGCCGTGTCTTGTTCAAACCAGCTCCTAATATTT	INDEL	intron_variant	MODIFIER	TraesCS1A03G0590000.2	9	TraesCS1A03G0590000	c.1534-60_1534-59insAAATATTAGGAGCTGGTTTGAACAAGACACGGCGGAATAGCGACTGGGAGCAGCGACCTCTGAGCCAGAAT
1A	396002322	464950019	26	0.718	0	-0.718	0.528	71	37	404675012	TGGTAGGTCATCTCTAACCATGAGTGAACAATAATTATGGCAATGCTATCTGGAATGCGCTTTCTAAAATAGCCGTCTTCCA	T	INDEL	frameshift_variant&splice_acceptor_variant&splice_donor_variant&splice_region_variant&intron_variant	HIGH	TraesCS1A03G0598600.1	5	TraesCS1A03G0598600	c.1017_1018-2delGGTAGGTCATCTCTAACCATGAGTGAACAATAATTATGGCAATGCTATCTGGAATGCGCTTTCTAAAATAGCCGTCTTCCA	p.Val340fs
1A	396002322	464950019	26	0.718	0	-0.718	0.528	71	37	404675012	TGGTAGGTCATCTCTAACCATGAGTGAACAATAATTATGGCAATGCTATCTGGAATGCGCTTTCTAAAATAGCCGTCTTCCA	T	INDEL	upstream_gene_variant	MODIFIER	TraesCS1A03G0598800LC.1	-1	TraesCS1A03G0598800LC	c.-810_-730delGGTAGGTCATCTCTAACCATGAGTGAACAATAATTATGGCAATGCTATCTGGAATGCGCTTTCTAAAATAGCCGTCTTCCA
1A	396002322	464950019	26	0.718	0	-0.718	0.528	71	37	404675012	TGGTAGGTCATCTCTAACCATGAGTGAACAATAATTATGGCAATGCTATCTGGAATGCGCTTTCTAAAATAGCCGTCTTCCA	T	INDEL	downstream_gene_variant	MODIFIER	TraesCS1A03G0598700.1	-1	TraesCS1A03G0598700	c.*778_*858delTGGAAGACGGCTATTTTAGAAAGCGCATTCCAGATAGCATTGCCATAATTATTGTTCACTCATGGTTAGAGATGACCTACC
1A	396002322	464950019	26	0.718	0	-0.718	0.528	71	37	404675012	TGGTAGGTCATCTCTAACCATGAGTGAACAATAATTATGGCAATGCTATCTGGAATGCGCTTTCTAAAATAGCCGTCTTCCA	T	INDEL	downstream_gene_variant	MODIFIER	TraesCS1A03G0598700.2	-1	TraesCS1A03G0598700	c.*778_*858delTGGAAGACGGCTATTTTAGAAAGCGCATTCCAGATAGCATTGCCATAATTATTGTTCACTCATGGTTAGAGATGACCTACC
1A	396002322	464950019	26	0.718	0	-0.718	0.528	71	37	404675012	TGGTAGGTCATCTCTAACCATGAGTGAACAATAATTATGGCAATGCTATCTGGAATGCGCTTTCTAAAATAGCCGTCTTCCA	T	INDEL	downstream_gene_variant	MODIFIER	TraesCS1A03G0598700.3	-1	TraesCS1A03G0598700	c.*778_*858delTGGAAGACGGCTATTTTAGAAAGCGCATTCCAGATAGCATTGCCATAATTATTGTTCACTCATGGTTAGAGATGACCTACC
1A	396002322	464950019	26	0	0.857	0.857	0.649	91	63	405302222	T	TTA	INDEL	splice_region_variant&intron_variant	LOW	TraesCS1A03G0600400.1	16	TraesCS1A03G0600400	c.1834-3_1834-2insTA
1A	396002322	464950019	26	0	0.817	0.817	0.564	62	71	427100486	T	TCCCCATGCCCCTGTATCTGCCCTCGAAGCCGGGTTCCGCGAGCTAAGGTTGCAGGGG	INDEL	splice_region_variant&intron_variant	LOW	TraesCS1A03G0621000LC.1	4	TraesCS1A03G0621000LC	c.306+2_306+3insCCCCATGCCCCTGTATCTGCCCTCGAAGCCGGGTTCCGCGAGCTAAGGTTGCAGGGG
1A	396002322	464950019	26	0	0.817	0.817	0.564	62	71	427100486	T	TCCCCATGCCCCTGTATCTGCCCTCGAAGCCGGGTTCCGCGAGCTAAGGTTGCAGGGG	INDEL	downstream_gene_variant	MODIFIER	TraesCS1A03G0621100.1	-1	TraesCS1A03G0621100	c.*3863_*3864insCCCCTGCAACCTTAGCTCGCGGAACCCGGCTTCGAGGGCAGATACAGGGGCATGGGG
1A	396002322	464950019	26	0	0.817	0.817	0.564	62	71	427100486	T	TCCCCATGCCCCTGTATCTGCCCTCGAAGCCGGGTTCCGCGAGCTAAGGTTGCAGGGG	INDEL	downstream_gene_variant	MODIFIER	TraesCS1A03G0621200.1	-1	TraesCS1A03G0621200	c.*4618_*4619insCCCCTGCAACCTTAGCTCGCGGAACCCGGCTTCGAGGGCAGATACAGGGGCATGGGG
1A	396002322	464950019	26	0	1	1	0.521	25	23	428739704	C	CGGCGATGATGTCGCGGTCGCA	INDEL	splice_acceptor_variant&intron_variant	HIGH	TraesCS1A03G0623400.1	1	TraesCS1A03G0623400	c.94-1_94insTGCGACCGCGACATCATCGCC
1A	396002322	464950019	26	0	1	1	0.521	25	23	428739704	C	CGGCGATGATGTCGCGGTCGCA	INDEL	downstream_gene_variant	MODIFIER	TraesCS1A03G0623300.1	-1	TraesCS1A03G0623300	c.*2205_*2206insGGCGATGATGTCGCGGTCGCA
1A	396002322	464950019	26	0	1	1	0.521	25	23	428739704	C	CGGCGATGATGTCGCGGTCGCA	INDEL	downstream_gene_variant	MODIFIER	TraesCS1A03G0623300.2	-1	TraesCS1A03G0623300	c.*2205_*2206insGGCGATGATGTCGCGGTCGCA
1A	396002322	464950019	26	0	0.773	0.773	0.667	29	22	432447436	G	GACTGCGGCAGAATATGAGCGAAGGA	INDEL	splice_donor_variant&intron_variant	HIGH	TraesCS1A03G0628300.1	1	TraesCS1A03G0628300	c.552_552+1insACTGCGGCAGAATATGAGCGAAGGA
1A	396002322	464950019	26	1	0	-1	0.478	36	33	440139635	G	GATGGAGAAAGGCAAACTTGACAAAGGA	INDEL	splice_donor_variant&intron_variant	HIGH	TraesCS1A03G0638500.1	6	TraesCS1A03G0638500	c.507_507+1insATGGAGAAAGGCAAACTTGACAAAGGA
1A	396002322	464950019	26	1	0	-1	0.478	36	33	440139635	G	GATGGAGAAAGGCAAACTTGACAAAGGA	INDEL	upstream_gene_variant	MODIFIER	TraesCS1A03G0638600LC.1	-1	TraesCS1A03G0638600LC	c.-4273_-4272insATGGAGAAAGGCAAACTTGACAAAGGA
1A	396002322	464950019	26	0	1	1	0.672	45	22	442714854	T	TCCAATGTGTGGGTTCTGTATGCTTTCCAGTCAACGATTCCTCCAAACTTGGTGACA	INDEL	splice_region_variant&intron_variant	LOW	TraesCS1A03G0644400.1	2	TraesCS1A03G0644400	c.529-3_529-2insTGTCACCAAGTTTGGAGGAATCGTTGACTGGAAAGCATACAGAACCCACACATTGG
1A	396002322	464950019	26	0.952	0	-0.952	0.579	42	53	444383229	A	AAATTTCTGTTGCGTCAACACGAGTGC	INDEL	splice_acceptor_variant&intron_variant	HIGH	TraesCS1A03G0648000.1	5	TraesCS1A03G0648000	c.469-1_469insGCACTCGTGTTGACGCAACAGAAATT
1A	396002322	464950019	26	0.952	0	-0.952	0.579	42	53	444383229	A	AAATTTCTGTTGCGTCAACACGAGTGC	INDEL	upstream_gene_variant	MODIFIER	TraesCS1A03G0648100.1	-1	TraesCS1A03G0648100	c.-2613_-2612insAATTTCTGTTGCGTCAACACGAGTGC
1A	396002322	464950019	26	0.952	0	-0.952	0.579	42	53	444383229	A	AAATTTCTGTTGCGTCAACACGAGTGC	INDEL	downstream_gene_variant	MODIFIER	TraesCS1A03G0647900.1	-1	TraesCS1A03G0647900	c.*847_*848insAATTTCTGTTGCGTCAACACGAGTGC
1A	396002322	464950019	26	0.953	0	-0.953	0.27	85	26	447070098	CACCTTTACATTCAGAAAGTTCAAAAAGTATCAGGATAACTCAAGAATAGGACAAGTCCAACCCAAAAGGACATAGGAAAATGAAGGAGACATCCTGCTATAAAAAAAAGGAGGATGATAAGGACATGTACAG	C	INDEL	frameshift_variant&splice_acceptor_variant&splice_region_variant&intron_variant	HIGH	TraesCS1A03G0652400.1	10	TraesCS1A03G0652400	c.1614+3_1616del	p.Val539fs
1A	396002322	464950019	26	0.953	0	-0.953	0.27	85	26	447070098	CACCTTTACATTCAGAAAGTTCAAAAAGTATCAGGATAACTCAAGAATAGGACAAGTCCAACCCAAAAGGACATAGGAAAATGAAGGAGACATCCTGCTATAAAAAAAAGGAGGATGATAAGGACATGTACAG	C	INDEL	frameshift_variant&splice_acceptor_variant&splice_region_variant&intron_variant	HIGH	TraesCS1A03G0652400.2	7	TraesCS1A03G0652400	c.1194+3_1196del	p.Val399fs
1A	396002322	464950019	26	0.953	0	-0.953	0.27	85	26	447070098	CACCTTTACATTCAGAAAGTTCAAAAAGTATCAGGATAACTCAAGAATAGGACAAGTCCAACCCAAAAGGACATAGGAAAATGAAGGAGACATCCTGCTATAAAAAAAAGGAGGATGATAAGGACATGTACAG	C	INDEL	frameshift_variant&splice_acceptor_variant&splice_region_variant&intron_variant	HIGH	TraesCS1A03G0652400.3	8	TraesCS1A03G0652400	c.1311+3_1313del	p.Val438fs
1A	396002322	464950019	26	0.951	0	-0.951	0.519	41	40	451341708	CTAGGTAGGTCAGCCCATAATAATCAGCAAGCGTCTCTGTCCCATCCATTTCGTTCTCTGAATCCGTGACTTGACACCCGGGCCGCCGGGCTGAAGCGTTGAATGTTCCTTCAAAACTGATGCTGAGATGAGATGGTTGGCTGTG	C	INDEL	splice_donor_variant&disruptive_inframe_deletion&splice_region_variant&intron_variant	HIGH	TraesCS1A03G0660000.1	4	TraesCS1A03G0660000	c.848_851-4del	p.Leu283_Gly284delinsArg
1A	396002322	464950019	26	0.893	0	-0.893	0.627	28	39	451341978	T	TTGAGCAACGTCGTCCAGGAACAGCAGGAGCAGCAGCAGCAGGGGAGCAG	INDEL	intron_variant	MODIFIER	TraesCS1A03G0660000.1	5	TraesCS1A03G0660000	c.964+9_964+10insTGAGCAACGTCGTCCAGGAACAGCAGGAGCAGCAGCAGCAGGGGAGCAG
1A	396002322	464950019	26	0.933	0	-0.933	0.464	119	88	454223235	T	TTTTTCTAATGGGGGAAACAAGCCTCAAAGAATCAATAGTTCTGCATCCTTTGATGTTCTTCTCAGCTTCAG	INDEL	downstream_gene_variant	MODIFIER	TraesCS1A03G0663800.1	-1	TraesCS1A03G0663800	c.*393_*394insCTGAAGCTGAGAAGAACATCAAAGGATGCAGAACTATTGATTCTTTGAGGCTTGTTTCCCCCATTAGAAAA
1A	396002322	464950019	26	0.933	0	-0.933	0.464	119	88	454223235	T	TTTTTCTAATGGGGGAAACAAGCCTCAAAGAATCAATAGTTCTGCATCCTTTGATGTTCTTCTCAGCTTCAG	INDEL	intergenic_region	MODIFIER	TraesCS1A03G0663700LC-TraesCS1A03G0663800	-1	TraesCS1A03G0663700LC-TraesCS1A03G0663800	n.454223235_454223236insTTTTCTAATGGGGGAAACAAGCCTCAAAGAATCAATAGTTCTGCATCCTTTGATGTTCTTCTCAGCTTCAG
1A	396002322	464950019	26	0	0.923	0.923	0.736	65	26	456095686	G	GACCACAGGACAATGAGATGGCAA	INDEL	splice_donor_variant&intron_variant	HIGH	TraesCS1A03G0666500.3	1	TraesCS1A03G0666500	c.677_677+1insACCACAGGACAATGAGATGGCAA
1A	396002322	464950019	26	0	0.923	0.923	0.736	65	26	456095686	G	GACCACAGGACAATGAGATGGCAA	INDEL	splice_donor_variant&intron_variant	HIGH	TraesCS1A03G0666500.1	1	TraesCS1A03G0666500	c.677_677+1insACCACAGGACAATGAGATGGCAA
1A	396002322	464950019	26	0	0.923	0.923	0.736	65	26	456095686	G	GACCACAGGACAATGAGATGGCAA	INDEL	splice_donor_variant&intron_variant	HIGH	TraesCS1A03G0666500.2	1	TraesCS1A03G0666500	c.677_677+1insACCACAGGACAATGAGATGGCAA
1A	396002322	464950019	26	0	0.923	0.923	0.736	65	26	456095686	G	GACCACAGGACAATGAGATGGCAA	INDEL	upstream_gene_variant	MODIFIER	TraesCS1A03G0666600LC.1	-1	TraesCS1A03G0666600LC	c.-184_-183insTTGCCATCTCATTGTCCTGTGGT
1A	396002322	464950019	26	0	0.923	0.923	0.736	65	26	456095686	G	GACCACAGGACAATGAGATGGCAA	INDEL	upstream_gene_variant	MODIFIER	TraesCS1A03G0666700LC.1	-1	TraesCS1A03G0666700LC	c.-1096_-1095insACCACAGGACAATGAGATGGCAA
1A	396002322	464950019	26	0	0.923	0.923	0.736	65	26	456095686	G	GACCACAGGACAATGAGATGGCAA	INDEL	upstream_gene_variant	MODIFIER	TraesCS1A03G0666800.1	-1	TraesCS1A03G0666800	c.-5223_-5222insACCACAGGACAATGAGATGGCAA
1A	396002322	464950019	26	0	0.923	0.923	0.736	65	26	456095686	G	GACCACAGGACAATGAGATGGCAA	INDEL	upstream_gene_variant	MODIFIER	TraesCS1A03G0666800.2	-1	TraesCS1A03G0666800	c.-5223_-5222insACCACAGGACAATGAGATGGCAA
1A	396002322	464950019	26	0	0.923	0.923	0.736	65	26	456095686	G	GACCACAGGACAATGAGATGGCAA	INDEL	downstream_gene_variant	MODIFIER	TraesCS1A03G0666400.1	-1	TraesCS1A03G0666400	c.*1758_*1759insACCACAGGACAATGAGATGGCAA
1A	396002322	464950019	26	0	0.923	0.923	0.736	65	26	456095686	G	GACCACAGGACAATGAGATGGCAA	INDEL	downstream_gene_variant	MODIFIER	TraesCS1A03G0666400.2	-1	TraesCS1A03G0666400	c.*1972_*1973insACCACAGGACAATGAGATGGCAA
1A	396002322	464950019	26	0	0.85	0.85	0.609	94	80	456779283	G	GATTCACAA	INDEL	splice_donor_variant&intron_variant	HIGH	TraesCS1A03G0667700.2	4	TraesCS1A03G0667700	c.342_342+1insATTCACAA
1A	396002322	464950019	26	0	0.85	0.85	0.609	94	80	456779283	G	GATTCACAA	INDEL	splice_donor_variant&intron_variant	HIGH	TraesCS1A03G0667700.1	3	TraesCS1A03G0667700	c.279_279+1insATTCACAA
1A	396002322	464950019	26	0	0.85	0.85	0.609	94	80	456779283	G	GATTCACAA	INDEL	upstream_gene_variant	MODIFIER	TraesCS1A03G0667600LC.1	-1	TraesCS1A03G0667600LC	c.-3316_-3315insTTGTGAAT
1A	396002322	464950019	26	0	0.759	0.759	0.562	61	83	462581911	C	CAGGCGGAGAGGAGGCAGTTGAGGAGCGTCATGTTGTATGGCACCCCGGAGAATTCCTCTGTGGATTTG	INDEL	splice_acceptor_variant&intron_variant	HIGH	TraesCS1A03G0674900.1	3	TraesCS1A03G0674900	c.171-2_171-1insCAAATCCACAGAGGAATTCTCCGGGGTGCCATACAACATGACGCTCCTCAACTGCCTCCTCTCCGCCT
1A	396002322	464950019	26	0.952	0	-0.952	0.986	21	1415	463072094	G	GCCGACTTCTTCCCCAAGTGCTGCAACAACTGCA	INDEL	splice_donor_variant&intron_variant	HIGH	TraesCS1A03G0676400.1	1	TraesCS1A03G0676400	c.76_76+1insCCGACTTCTTCCCCAAGTGCTGCAACAACTGCA
1A	396002322	464950019	26	0.952	0	-0.952	0.986	21	1415	463072094	G	GCCGACTTCTTCCCCAAGTGCTGCAACAACTGCA	INDEL	downstream_gene_variant	MODIFIER	TraesCS1A03G0676300.1	-1	TraesCS1A03G0676300	c.*5148_*5149insCCGACTTCTTCCCCAAGTGCTGCAACAACTGCA
1A	396002322	464950019	26	0.3	0.8	0.5	0.467	40	35	464950019	G	A	SNP	missense_variant	MODERATE	TraesCS1A03G0681600.1	2	TraesCS1A03G0681600	c.442C>T	p.Pro148Ser
1A	427100485	497828305	23	0	0.817	0.817	0.564	62	71	427100486	T	TCCCCATGCCCCTGTATCTGCCCTCGAAGCCGGGTTCCGCGAGCTAAGGTTGCAGGGG	INDEL	splice_region_variant&intron_variant	LOW	TraesCS1A03G0621000LC.1	4	TraesCS1A03G0621000LC	c.306+2_306+3insCCCCATGCCCCTGTATCTGCCCTCGAAGCCGGGTTCCGCGAGCTAAGGTTGCAGGGG
1A	427100485	497828305	23	0	0.817	0.817	0.564	62	71	427100486	T	TCCCCATGCCCCTGTATCTGCCCTCGAAGCCGGGTTCCGCGAGCTAAGGTTGCAGGGG	INDEL	downstream_gene_variant	MODIFIER	TraesCS1A03G0621100.1	-1	TraesCS1A03G0621100	c.*3863_*3864insCCCCTGCAACCTTAGCTCGCGGAACCCGGCTTCGAGGGCAGATACAGGGGCATGGGG
1A	427100485	497828305	23	0	0.817	0.817	0.564	62	71	427100486	T	TCCCCATGCCCCTGTATCTGCCCTCGAAGCCGGGTTCCGCGAGCTAAGGTTGCAGGGG	INDEL	downstream_gene_variant	MODIFIER	TraesCS1A03G0621200.1	-1	TraesCS1A03G0621200	c.*4618_*4619insCCCCTGCAACCTTAGCTCGCGGAACCCGGCTTCGAGGGCAGATACAGGGGCATGGGG
1A	427100485	497828305	23	0	1	1	0.521	25	23	428739704	C	CGGCGATGATGTCGCGGTCGCA	INDEL	splice_acceptor_variant&intron_variant	HIGH	TraesCS1A03G0623400.1	1	TraesCS1A03G0623400	c.94-1_94insTGCGACCGCGACATCATCGCC
1A	427100485	497828305	23	0	1	1	0.521	25	23	428739704	C	CGGCGATGATGTCGCGGTCGCA	INDEL	downstream_gene_variant	MODIFIER	TraesCS1A03G0623300.1	-1	TraesCS1A03G0623300	c.*2205_*2206insGGCGATGATGTCGCGGTCGCA
1A	427100485	497828305	23	0	1	1	0.521	25	23	428739704	C	CGGCGATGATGTCGCGGTCGCA	INDEL	downstream_gene_variant	MODIFIER	TraesCS1A03G0623300.2	-1	TraesCS1A03G0623300	c.*2205_*2206insGGCGATGATGTCGCGGTCGCA
1A	427100485	497828305	23	0	0.773	0.773	0.667	29	22	432447436	G	GACTGCGGCAGAATATGAGCGAAGGA	INDEL	splice_donor_variant&intron_variant	HIGH	TraesCS1A03G0628300.1	1	TraesCS1A03G0628300	c.552_552+1insACTGCGGCAGAATATGAGCGAAGGA
1A	427100485	497828305	23	1	0	-1	0.478	36	33	440139635	G	GATGGAGAAAGGCAAACTTGACAAAGGA	INDEL	splice_donor_variant&intron_variant	HIGH	TraesCS1A03G0638500.1	6	TraesCS1A03G0638500	c.507_507+1insATGGAGAAAGGCAAACTTGACAAAGGA
1A	427100485	497828305	23	1	0	-1	0.478	36	33	440139635	G	GATGGAGAAAGGCAAACTTGACAAAGGA	INDEL	upstream_gene_variant	MODIFIER	TraesCS1A03G0638600LC.1	-1	TraesCS1A03G0638600LC	c.-4273_-4272insATGGAGAAAGGCAAACTTGACAAAGGA
1A	427100485	497828305	23	0	1	1	0.672	45	22	442714854	T	TCCAATGTGTGGGTTCTGTATGCTTTCCAGTCAACGATTCCTCCAAACTTGGTGACA	INDEL	splice_region_variant&intron_variant	LOW	TraesCS1A03G0644400.1	2	TraesCS1A03G0644400	c.529-3_529-2insTGTCACCAAGTTTGGAGGAATCGTTGACTGGAAAGCATACAGAACCCACACATTGG
1A	427100485	497828305	23	0.952	0	-0.952	0.579	42	53	444383229	A	AAATTTCTGTTGCGTCAACACGAGTGC	INDEL	splice_acceptor_variant&intron_variant	HIGH	TraesCS1A03G0648000.1	5	TraesCS1A03G0648000	c.469-1_469insGCACTCGTGTTGACGCAACAGAAATT
1A	427100485	497828305	23	0.952	0	-0.952	0.579	42	53	444383229	A	AAATTTCTGTTGCGTCAACACGAGTGC	INDEL	upstream_gene_variant	MODIFIER	TraesCS1A03G0648100.1	-1	TraesCS1A03G0648100	c.-2613_-2612insAATTTCTGTTGCGTCAACACGAGTGC
1A	427100485	497828305	23	0.952	0	-0.952	0.579	42	53	444383229	A	AAATTTCTGTTGCGTCAACACGAGTGC	INDEL	downstream_gene_variant	MODIFIER	TraesCS1A03G0647900.1	-1	TraesCS1A03G0647900	c.*847_*848insAATTTCTGTTGCGTCAACACGAGTGC
1A	427100485	497828305	23	0.953	0	-0.953	0.27	85	26	447070098	CACCTTTACATTCAGAAAGTTCAAAAAGTATCAGGATAACTCAAGAATAGGACAAGTCCAACCCAAAAGGACATAGGAAAATGAAGGAGACATCCTGCTATAAAAAAAAGGAGGATGATAAGGACATGTACAG	C	INDEL	frameshift_variant&splice_acceptor_variant&splice_region_variant&intron_variant	HIGH	TraesCS1A03G0652400.1	10	TraesCS1A03G0652400	c.1614+3_1616del	p.Val539fs
1A	427100485	497828305	23	0.953	0	-0.953	0.27	85	26	447070098	CACCTTTACATTCAGAAAGTTCAAAAAGTATCAGGATAACTCAAGAATAGGACAAGTCCAACCCAAAAGGACATAGGAAAATGAAGGAGACATCCTGCTATAAAAAAAAGGAGGATGATAAGGACATGTACAG	C	INDEL	frameshift_variant&splice_acceptor_variant&splice_region_variant&intron_variant	HIGH	TraesCS1A03G0652400.2	7	TraesCS1A03G0652400	c.1194+3_1196del	p.Val399fs
1A	427100485	497828305	23	0.953	0	-0.953	0.27	85	26	447070098	CACCTTTACATTCAGAAAGTTCAAAAAGTATCAGGATAACTCAAGAATAGGACAAGTCCAACCCAAAAGGACATAGGAAAATGAAGGAGACATCCTGCTATAAAAAAAAGGAGGATGATAAGGACATGTACAG	C	INDEL	frameshift_variant&splice_acceptor_variant&splice_region_variant&intron_variant	HIGH	TraesCS1A03G0652400.3	8	TraesCS1A03G0652400	c.1311+3_1313del	p.Val438fs
1A	427100485	497828305	23	0.951	0	-0.951	0.519	41	40	451341708	CTAGGTAGGTCAGCCCATAATAATCAGCAAGCGTCTCTGTCCCATCCATTTCGTTCTCTGAATCCGTGACTTGACACCCGGGCCGCCGGGCTGAAGCGTTGAATGTTCCTTCAAAACTGATGCTGAGATGAGATGGTTGGCTGTG	C	INDEL	splice_donor_variant&disruptive_inframe_deletion&splice_region_variant&intron_variant	HIGH	TraesCS1A03G0660000.1	4	TraesCS1A03G0660000	c.848_851-4del	p.Leu283_Gly284delinsArg
1A	427100485	497828305	23	0.893	0	-0.893	0.627	28	39	451341978	T	TTGAGCAACGTCGTCCAGGAACAGCAGGAGCAGCAGCAGCAGGGGAGCAG	INDEL	intron_variant	MODIFIER	TraesCS1A03G0660000.1	5	TraesCS1A03G0660000	c.964+9_964+10insTGAGCAACGTCGTCCAGGAACAGCAGGAGCAGCAGCAGCAGGGGAGCAG
1A	427100485	497828305	23	0.933	0	-0.933	0.464	119	88	454223235	T	TTTTTCTAATGGGGGAAACAAGCCTCAAAGAATCAATAGTTCTGCATCCTTTGATGTTCTTCTCAGCTTCAG	INDEL	downstream_gene_variant	MODIFIER	TraesCS1A03G0663800.1	-1	TraesCS1A03G0663800	c.*393_*394insCTGAAGCTGAGAAGAACATCAAAGGATGCAGAACTATTGATTCTTTGAGGCTTGTTTCCCCCATTAGAAAA
1A	427100485	497828305	23	0.933	0	-0.933	0.464	119	88	454223235	T	TTTTTCTAATGGGGGAAACAAGCCTCAAAGAATCAATAGTTCTGCATCCTTTGATGTTCTTCTCAGCTTCAG	INDEL	intergenic_region	MODIFIER	TraesCS1A03G0663700LC-TraesCS1A03G0663800	-1	TraesCS1A03G0663700LC-TraesCS1A03G0663800	n.454223235_454223236insTTTTCTAATGGGGGAAACAAGCCTCAAAGAATCAATAGTTCTGCATCCTTTGATGTTCTTCTCAGCTTCAG
1A	427100485	497828305	23	0	0.923	0.923	0.736	65	26	456095686	G	GACCACAGGACAATGAGATGGCAA	INDEL	splice_donor_variant&intron_variant	HIGH	TraesCS1A03G0666500.3	1	TraesCS1A03G0666500	c.677_677+1insACCACAGGACAATGAGATGGCAA
1A	427100485	497828305	23	0	0.923	0.923	0.736	65	26	456095686	G	GACCACAGGACAATGAGATGGCAA	INDEL	splice_donor_variant&intron_variant	HIGH	TraesCS1A03G0666500.1	1	TraesCS1A03G0666500	c.677_677+1insACCACAGGACAATGAGATGGCAA
1A	427100485	497828305	23	0	0.923	0.923	0.736	65	26	456095686	G	GACCACAGGACAATGAGATGGCAA	INDEL	splice_donor_variant&intron_variant	HIGH	TraesCS1A03G0666500.2	1	TraesCS1A03G0666500	c.677_677+1insACCACAGGACAATGAGATGGCAA
1A	427100485	497828305	23	0	0.923	0.923	0.736	65	26	456095686	G	GACCACAGGACAATGAGATGGCAA	INDEL	upstream_gene_variant	MODIFIER	TraesCS1A03G0666600LC.1	-1	TraesCS1A03G0666600LC	c.-184_-183insTTGCCATCTCATTGTCCTGTGGT
1A	427100485	497828305	23	0	0.923	0.923	0.736	65	26	456095686	G	GACCACAGGACAATGAGATGGCAA	INDEL	upstream_gene_variant	MODIFIER	TraesCS1A03G0666700LC.1	-1	TraesCS1A03G0666700LC	c.-1096_-1095insACCACAGGACAATGAGATGGCAA
1A	427100485	497828305	23	0	0.923	0.923	0.736	65	26	456095686	G	GACCACAGGACAATGAGATGGCAA	INDEL	upstream_gene_variant	MODIFIER	TraesCS1A03G0666800.1	-1	TraesCS1A03G0666800	c.-5223_-5222insACCACAGGACAATGAGATGGCAA
1A	427100485	497828305	23	0	0.923	0.923	0.736	65	26	456095686	G	GACCACAGGACAATGAGATGGCAA	INDEL	upstream_gene_variant	MODIFIER	TraesCS1A03G0666800.2	-1	TraesCS1A03G0666800	c.-5223_-5222insACCACAGGACAATGAGATGGCAA
1A	427100485	497828305	23	0	0.923	0.923	0.736	65	26	456095686	G	GACCACAGGACAATGAGATGGCAA	INDEL	downstream_gene_variant	MODIFIER	TraesCS1A03G0666400.1	-1	TraesCS1A03G0666400	c.*1758_*1759insACCACAGGACAATGAGATGGCAA
1A	427100485	497828305	23	0	0.923	0.923	0.736	65	26	456095686	G	GACCACAGGACAATGAGATGGCAA	INDEL	downstream_gene_variant	MODIFIER	TraesCS1A03G0666400.2	-1	TraesCS1A03G0666400	c.*1972_*1973insACCACAGGACAATGAGATGGCAA
1A	427100485	497828305	23	0	0.85	0.85	0.609	94	80	456779283	G	GATTCACAA	INDEL	splice_donor_variant&intron_variant	HIGH	TraesCS1A03G0667700.2	4	TraesCS1A03G0667700	c.342_342+1insATTCACAA
1A	427100485	497828305	23	0	0.85	0.85	0.609	94	80	456779283	G	GATTCACAA	INDEL	splice_donor_variant&intron_variant	HIGH	TraesCS1A03G0667700.1	3	TraesCS1A03G0667700	c.279_279+1insATTCACAA
1A	427100485	497828305	23	0	0.85	0.85	0.609	94	80	456779283	G	GATTCACAA	INDEL	upstream_gene_variant	MODIFIER	TraesCS1A03G0667600LC.1	-1	TraesCS1A03G0667600LC	c.-3316_-3315insTTGTGAAT
1A	427100485	497828305	23	0	0.759	0.759	0.562	61	83	462581911	C	CAGGCGGAGAGGAGGCAGTTGAGGAGCGTCATGTTGTATGGCACCCCGGAGAATTCCTCTGTGGATTTG	INDEL	splice_acceptor_variant&intron_variant	HIGH	TraesCS1A03G0674900.1	3	TraesCS1A03G0674900	c.171-2_171-1insCAAATCCACAGAGGAATTCTCCGGGGTGCCATACAACATGACGCTCCTCAACTGCCTCCTCTCCGCCT
1A	427100485	497828305	23	0.952	0	-0.952	0.986	21	1415	463072094	G	GCCGACTTCTTCCCCAAGTGCTGCAACAACTGCA	INDEL	splice_donor_variant&intron_variant	HIGH	TraesCS1A03G0676400.1	1	TraesCS1A03G0676400	c.76_76+1insCCGACTTCTTCCCCAAGTGCTGCAACAACTGCA
1A	427100485	497828305	23	0.952	0	-0.952	0.986	21	1415	463072094	G	GCCGACTTCTTCCCCAAGTGCTGCAACAACTGCA	INDEL	downstream_gene_variant	MODIFIER	TraesCS1A03G0676300.1	-1	TraesCS1A03G0676300	c.*5148_*5149insCCGACTTCTTCCCCAAGTGCTGCAACAACTGCA
1A	427100485	497828305	23	0.3	0.8	0.5	0.467	40	35	464950019	G	A	SNP	missense_variant	MODERATE	TraesCS1A03G0681600.1	2	TraesCS1A03G0681600	c.442C>T	p.Pro148Ser
1A	427100485	497828305	23	1	0	-1	0.545	20	24	471040680	T	TGGG	INDEL	splice_region_variant&intron_variant	LOW	TraesCS1A03G0694300.1	1	TraesCS1A03G0694300	c.293-3_293-2insCCC
1A	427100485	497828305	23	1	0	-1	0.545	20	24	471040680	T	TGGG	INDEL	upstream_gene_variant	MODIFIER	TraesCS1A03G0694200.1	-1	TraesCS1A03G0694200	c.-4976_-4975insCCC
1A	427100485	497828305	23	1	0	-1	0.545	20	24	471040680	T	TGGG	INDEL	downstream_gene_variant	MODIFIER	TraesCS1A03G0694400LC.1	-1	TraesCS1A03G0694400LC	c.*136_*137insGGG
1A	427100485	497828305	23	0.963	0	-0.963	0.5	27	25	475265181	T	TTTCCAGAA	INDEL	splice_region_variant&intron_variant	LOW	TraesCS1A03G0701700.3	20	TraesCS1A03G0701700	c.5147-3_5147-2insTTCTGGAA
1A	427100485	497828305	23	0.963	0	-0.963	0.5	27	25	475265181	T	TTTCCAGAA	INDEL	splice_region_variant&intron_variant	LOW	TraesCS1A03G0701700.1	19	TraesCS1A03G0701700	c.*34-3_*34-2insTTCTGGAA
1A	427100485	497828305	23	0.963	0	-0.963	0.5	27	25	475265181	T	TTTCCAGAA	INDEL	splice_region_variant&intron_variant	LOW	TraesCS1A03G0701700.2	20	TraesCS1A03G0701700	c.*34-3_*34-2insTTCTGGAA
1A	427100485	497828305	23	0.963	0	-0.963	0.5	27	25	475265181	T	TTTCCAGAA	INDEL	upstream_gene_variant	MODIFIER	TraesCS1A03G0701600.1	-1	TraesCS1A03G0701600	c.-1577_-1576insTTCTGGAA
1A	427100485	497828305	23	0	0.966	0.966	0.467	48	59	482028766	C	CAGGACAAACTACTTCATCTT	INDEL	splice_region_variant&intron_variant	LOW	TraesCS1A03G0711700.1	1	TraesCS1A03G0711700	c.158+4_158+5insAGGACAAACTACTTCATCTT
1A	427100485	497828305	23	0	0.966	0.966	0.467	48	59	482028766	C	CAGGACAAACTACTTCATCTT	INDEL	downstream_gene_variant	MODIFIER	TraesCS1A03G0711800.1	-1	TraesCS1A03G0711800	c.*4378_*4379insAAGATGAAGTAGTTTGTCCT
1A	427100485	497828305	23	0	0.857	0.857	0.64	29	21	484346930	A	ATGATGGAGGCTACTTCAATGCAGTAAT	INDEL	splice_donor_variant&intron_variant	HIGH	TraesCS1A03G0718900.1	2	TraesCS1A03G0718900	c.155_155+1insTGATGGAGGCTACTTCAATGCAGTAAT
1A	427100485	497828305	23	0.962	0	-0.962	0.643	26	44	497828305	A	ACAAAGCG	INDEL	splice_region_variant&intron_variant	LOW	TraesCS1A03G0753000.2	20	TraesCS1A03G0753000	c.2490+5_2490+6insCAAAGCG
1A	427100485	497828305	23	0.962	0	-0.962	0.643	26	44	497828305	A	ACAAAGCG	INDEL	splice_region_variant&intron_variant	LOW	TraesCS1A03G0753000.1	19	TraesCS1A03G0753000	c.2319+5_2319+6insCAAAGCG
1A	427100485	497828305	23	0.962	0	-0.962	0.643	26	44	497828305	A	ACAAAGCG	INDEL	downstream_gene_variant	MODIFIER	TraesCS1A03G0753100LC.1	-1	TraesCS1A03G0753100LC	c.*91_*92insCGCTTTG
1A	427100485	497828305	23	0.962	0	-0.962	0.643	26	44	497828305	A	ACAAAGCG	INDEL	downstream_gene_variant	MODIFIER	TraesCS1A03G0753200.1	-1	TraesCS1A03G0753200	c.*1174_*1175insCGCTTTG
1A	444383228	510139024	68	0.952	0	-0.952	0.579	42	53	444383229	A	AAATTTCTGTTGCGTCAACACGAGTGC	INDEL	splice_acceptor_variant&intron_variant	HIGH	TraesCS1A03G0648000.1	5	TraesCS1A03G0648000	c.469-1_469insGCACTCGTGTTGACGCAACAGAAATT
1A	444383228	510139024	68	0.952	0	-0.952	0.579	42	53	444383229	A	AAATTTCTGTTGCGTCAACACGAGTGC	INDEL	upstream_gene_variant	MODIFIER	TraesCS1A03G0648100.1	-1	TraesCS1A03G0648100	c.-2613_-2612insAATTTCTGTTGCGTCAACACGAGTGC
1A	444383228	510139024	68	0.952	0	-0.952	0.579	42	53	444383229	A	AAATTTCTGTTGCGTCAACACGAGTGC	INDEL	downstream_gene_variant	MODIFIER	TraesCS1A03G0647900.1	-1	TraesCS1A03G0647900	c.*847_*848insAATTTCTGTTGCGTCAACACGAGTGC
1A	444383228	510139024	68	0.953	0	-0.953	0.27	85	26	447070098	CACCTTTACATTCAGAAAGTTCAAAAAGTATCAGGATAACTCAAGAATAGGACAAGTCCAACCCAAAAGGACATAGGAAAATGAAGGAGACATCCTGCTATAAAAAAAAGGAGGATGATAAGGACATGTACAG	C	INDEL	frameshift_variant&splice_acceptor_variant&splice_region_variant&intron_variant	HIGH	TraesCS1A03G0652400.1	10	TraesCS1A03G0652400	c.1614+3_1616del	p.Val539fs
1A	444383228	510139024	68	0.953	0	-0.953	0.27	85	26	447070098	CACCTTTACATTCAGAAAGTTCAAAAAGTATCAGGATAACTCAAGAATAGGACAAGTCCAACCCAAAAGGACATAGGAAAATGAAGGAGACATCCTGCTATAAAAAAAAGGAGGATGATAAGGACATGTACAG	C	INDEL	frameshift_variant&splice_acceptor_variant&splice_region_variant&intron_variant	HIGH	TraesCS1A03G0652400.2	7	TraesCS1A03G0652400	c.1194+3_1196del	p.Val399fs
1A	444383228	510139024	68	0.953	0	-0.953	0.27	85	26	447070098	CACCTTTACATTCAGAAAGTTCAAAAAGTATCAGGATAACTCAAGAATAGGACAAGTCCAACCCAAAAGGACATAGGAAAATGAAGGAGACATCCTGCTATAAAAAAAAGGAGGATGATAAGGACATGTACAG	C	INDEL	frameshift_variant&splice_acceptor_variant&splice_region_variant&intron_variant	HIGH	TraesCS1A03G0652400.3	8	TraesCS1A03G0652400	c.1311+3_1313del	p.Val438fs
1A	444383228	510139024	68	0.951	0	-0.951	0.519	41	40	451341708	CTAGGTAGGTCAGCCCATAATAATCAGCAAGCGTCTCTGTCCCATCCATTTCGTTCTCTGAATCCGTGACTTGACACCCGGGCCGCCGGGCTGAAGCGTTGAATGTTCCTTCAAAACTGATGCTGAGATGAGATGGTTGGCTGTG	C	INDEL	splice_donor_variant&disruptive_inframe_deletion&splice_region_variant&intron_variant	HIGH	TraesCS1A03G0660000.1	4	TraesCS1A03G0660000	c.848_851-4del	p.Leu283_Gly284delinsArg
1A	444383228	510139024	68	0.893	0	-0.893	0.627	28	39	451341978	T	TTGAGCAACGTCGTCCAGGAACAGCAGGAGCAGCAGCAGCAGGGGAGCAG	INDEL	intron_variant	MODIFIER	TraesCS1A03G0660000.1	5	TraesCS1A03G0660000	c.964+9_964+10insTGAGCAACGTCGTCCAGGAACAGCAGGAGCAGCAGCAGCAGGGGAGCAG
1A	444383228	510139024	68	0.933	0	-0.933	0.464	119	88	454223235	T	TTTTTCTAATGGGGGAAACAAGCCTCAAAGAATCAATAGTTCTGCATCCTTTGATGTTCTTCTCAGCTTCAG	INDEL	downstream_gene_variant	MODIFIER	TraesCS1A03G0663800.1	-1	TraesCS1A03G0663800	c.*393_*394insCTGAAGCTGAGAAGAACATCAAAGGATGCAGAACTATTGATTCTTTGAGGCTTGTTTCCCCCATTAGAAAA
1A	444383228	510139024	68	0.933	0	-0.933	0.464	119	88	454223235	T	TTTTTCTAATGGGGGAAACAAGCCTCAAAGAATCAATAGTTCTGCATCCTTTGATGTTCTTCTCAGCTTCAG	INDEL	intergenic_region	MODIFIER	TraesCS1A03G0663700LC-TraesCS1A03G0663800	-1	TraesCS1A03G0663700LC-TraesCS1A03G0663800	n.454223235_454223236insTTTTCTAATGGGGGAAACAAGCCTCAAAGAATCAATAGTTCTGCATCCTTTGATGTTCTTCTCAGCTTCAG
1A	444383228	510139024	68	0	0.923	0.923	0.736	65	26	456095686	G	GACCACAGGACAATGAGATGGCAA	INDEL	splice_donor_variant&intron_variant	HIGH	TraesCS1A03G0666500.3	1	TraesCS1A03G0666500	c.677_677+1insACCACAGGACAATGAGATGGCAA
1A	444383228	510139024	68	0	0.923	0.923	0.736	65	26	456095686	G	GACCACAGGACAATGAGATGGCAA	INDEL	splice_donor_variant&intron_variant	HIGH	TraesCS1A03G0666500.1	1	TraesCS1A03G0666500	c.677_677+1insACCACAGGACAATGAGATGGCAA
1A	444383228	510139024	68	0	0.923	0.923	0.736	65	26	456095686	G	GACCACAGGACAATGAGATGGCAA	INDEL	splice_donor_variant&intron_variant	HIGH	TraesCS1A03G0666500.2	1	TraesCS1A03G0666500	c.677_677+1insACCACAGGACAATGAGATGGCAA
1A	444383228	510139024	68	0	0.923	0.923	0.736	65	26	456095686	G	GACCACAGGACAATGAGATGGCAA	INDEL	upstream_gene_variant	MODIFIER	TraesCS1A03G0666600LC.1	-1	TraesCS1A03G0666600LC	c.-184_-183insTTGCCATCTCATTGTCCTGTGGT
1A	444383228	510139024	68	0	0.923	0.923	0.736	65	26	456095686	G	GACCACAGGACAATGAGATGGCAA	INDEL	upstream_gene_variant	MODIFIER	TraesCS1A03G0666700LC.1	-1	TraesCS1A03G0666700LC	c.-1096_-1095insACCACAGGACAATGAGATGGCAA
1A	444383228	510139024	68	0	0.923	0.923	0.736	65	26	456095686	G	GACCACAGGACAATGAGATGGCAA	INDEL	upstream_gene_variant	MODIFIER	TraesCS1A03G0666800.1	-1	TraesCS1A03G0666800	c.-5223_-5222insACCACAGGACAATGAGATGGCAA
1A	444383228	510139024	68	0	0.923	0.923	0.736	65	26	456095686	G	GACCACAGGACAATGAGATGGCAA	INDEL	upstream_gene_variant	MODIFIER	TraesCS1A03G0666800.2	-1	TraesCS1A03G0666800	c.-5223_-5222insACCACAGGACAATGAGATGGCAA
1A	444383228	510139024	68	0	0.923	0.923	0.736	65	26	456095686	G	GACCACAGGACAATGAGATGGCAA	INDEL	downstream_gene_variant	MODIFIER	TraesCS1A03G0666400.1	-1	TraesCS1A03G0666400	c.*1758_*1759insACCACAGGACAATGAGATGGCAA
1A	444383228	510139024	68	0	0.923	0.923	0.736	65	26	456095686	G	GACCACAGGACAATGAGATGGCAA	INDEL	downstream_gene_variant	MODIFIER	TraesCS1A03G0666400.2	-1	TraesCS1A03G0666400	c.*1972_*1973insACCACAGGACAATGAGATGGCAA
1A	444383228	510139024	68	0	0.85	0.85	0.609	94	80	456779283	G	GATTCACAA	INDEL	splice_donor_variant&intron_variant	HIGH	TraesCS1A03G0667700.2	4	TraesCS1A03G0667700	c.342_342+1insATTCACAA
1A	444383228	510139024	68	0	0.85	0.85	0.609	94	80	456779283	G	GATTCACAA	INDEL	splice_donor_variant&intron_variant	HIGH	TraesCS1A03G0667700.1	3	TraesCS1A03G0667700	c.279_279+1insATTCACAA
1A	444383228	510139024	68	0	0.85	0.85	0.609	94	80	456779283	G	GATTCACAA	INDEL	upstream_gene_variant	MODIFIER	TraesCS1A03G0667600LC.1	-1	TraesCS1A03G0667600LC	c.-3316_-3315insTTGTGAAT
1A	444383228	510139024	68	0	0.759	0.759	0.562	61	83	462581911	C	CAGGCGGAGAGGAGGCAGTTGAGGAGCGTCATGTTGTATGGCACCCCGGAGAATTCCTCTGTGGATTTG	INDEL	splice_acceptor_variant&intron_variant	HIGH	TraesCS1A03G0674900.1	3	TraesCS1A03G0674900	c.171-2_171-1insCAAATCCACAGAGGAATTCTCCGGGGTGCCATACAACATGACGCTCCTCAACTGCCTCCTCTCCGCCT
1A	444383228	510139024	68	0.952	0	-0.952	0.986	21	1415	463072094	G	GCCGACTTCTTCCCCAAGTGCTGCAACAACTGCA	INDEL	splice_donor_variant&intron_variant	HIGH	TraesCS1A03G0676400.1	1	TraesCS1A03G0676400	c.76_76+1insCCGACTTCTTCCCCAAGTGCTGCAACAACTGCA
1A	444383228	510139024	68	0.952	0	-0.952	0.986	21	1415	463072094	G	GCCGACTTCTTCCCCAAGTGCTGCAACAACTGCA	INDEL	downstream_gene_variant	MODIFIER	TraesCS1A03G0676300.1	-1	TraesCS1A03G0676300	c.*5148_*5149insCCGACTTCTTCCCCAAGTGCTGCAACAACTGCA
1A	444383228	510139024	68	0.3	0.8	0.5	0.467	40	35	464950019	G	A	SNP	missense_variant	MODERATE	TraesCS1A03G0681600.1	2	TraesCS1A03G0681600	c.442C>T	p.Pro148Ser
1A	444383228	510139024	68	1	0	-1	0.545	20	24	471040680	T	TGGG	INDEL	splice_region_variant&intron_variant	LOW	TraesCS1A03G0694300.1	1	TraesCS1A03G0694300	c.293-3_293-2insCCC
1A	444383228	510139024	68	1	0	-1	0.545	20	24	471040680	T	TGGG	INDEL	upstream_gene_variant	MODIFIER	TraesCS1A03G0694200.1	-1	TraesCS1A03G0694200	c.-4976_-4975insCCC
1A	444383228	510139024	68	1	0	-1	0.545	20	24	471040680	T	TGGG	INDEL	downstream_gene_variant	MODIFIER	TraesCS1A03G0694400LC.1	-1	TraesCS1A03G0694400LC	c.*136_*137insGGG
1A	444383228	510139024	68	0.963	0	-0.963	0.5	27	25	475265181	T	TTTCCAGAA	INDEL	splice_region_variant&intron_variant	LOW	TraesCS1A03G0701700.3	20	TraesCS1A03G0701700	c.5147-3_5147-2insTTCTGGAA
1A	444383228	510139024	68	0.963	0	-0.963	0.5	27	25	475265181	T	TTTCCAGAA	INDEL	splice_region_variant&intron_variant	LOW	TraesCS1A03G0701700.1	19	TraesCS1A03G0701700	c.*34-3_*34-2insTTCTGGAA
1A	444383228	510139024	68	0.963	0	-0.963	0.5	27	25	475265181	T	TTTCCAGAA	INDEL	splice_region_variant&intron_variant	LOW	TraesCS1A03G0701700.2	20	TraesCS1A03G0701700	c.*34-3_*34-2insTTCTGGAA
1A	444383228	510139024	68	0.963	0	-0.963	0.5	27	25	475265181	T	TTTCCAGAA	INDEL	upstream_gene_variant	MODIFIER	TraesCS1A03G0701600.1	-1	TraesCS1A03G0701600	c.-1577_-1576insTTCTGGAA
1A	444383228	510139024	68	0	0.966	0.966	0.467	48	59	482028766	C	CAGGACAAACTACTTCATCTT	INDEL	splice_region_variant&intron_variant	LOW	TraesCS1A03G0711700.1	1	TraesCS1A03G0711700	c.158+4_158+5insAGGACAAACTACTTCATCTT
1A	444383228	510139024	68	0	0.966	0.966	0.467	48	59	482028766	C	CAGGACAAACTACTTCATCTT	INDEL	downstream_gene_variant	MODIFIER	TraesCS1A03G0711800.1	-1	TraesCS1A03G0711800	c.*4378_*4379insAAGATGAAGTAGTTTGTCCT
1A	444383228	510139024	68	0	0.857	0.857	0.64	29	21	484346930	A	ATGATGGAGGCTACTTCAATGCAGTAAT	INDEL	splice_donor_variant&intron_variant	HIGH	TraesCS1A03G0718900.1	2	TraesCS1A03G0718900	c.155_155+1insTGATGGAGGCTACTTCAATGCAGTAAT
1A	444383228	510139024	68	0.962	0	-0.962	0.643	26	44	497828305	A	ACAAAGCG	INDEL	splice_region_variant&intron_variant	LOW	TraesCS1A03G0753000.2	20	TraesCS1A03G0753000	c.2490+5_2490+6insCAAAGCG
1A	444383228	510139024	68	0.962	0	-0.962	0.643	26	44	497828305	A	ACAAAGCG	INDEL	splice_region_variant&intron_variant	LOW	TraesCS1A03G0753000.1	19	TraesCS1A03G0753000	c.2319+5_2319+6insCAAAGCG
1A	444383228	510139024	68	0.962	0	-0.962	0.643	26	44	497828305	A	ACAAAGCG	INDEL	downstream_gene_variant	MODIFIER	TraesCS1A03G0753100LC.1	-1	TraesCS1A03G0753100LC	c.*91_*92insCGCTTTG
1A	444383228	510139024	68	0.962	0	-0.962	0.643	26	44	497828305	A	ACAAAGCG	INDEL	downstream_gene_variant	MODIFIER	TraesCS1A03G0753200.1	-1	TraesCS1A03G0753200	c.*1174_*1175insCGCTTTG
1A	444383228	510139024	68	0.727	0.261	-0.466	0.544	33	46	500039509	C	T	SNP	3_prime_UTR_variant	MODIFIER	TraesCS1A03G0761500.1	4	TraesCS1A03G0761500	c.*120C>T
1A	444383228	510139024	68	0.727	0.261	-0.466	0.544	33	46	500039509	C	T	SNP	downstream_gene_variant	MODIFIER	TraesCS1A03G0761600.1	-1	TraesCS1A03G0761600	c.*767G>A
1A	444383228	510139024	68	0.767	0	-0.767	0.558	30	22	500693618	T	TCAGTCGCCGGTCGCCACCGCCGCCGCAGCCGCGTCAACCAGCCCAGGCGAGCAAATCGGGGGCGGAGCC	INDEL	splice_region_variant&intron_variant	LOW	TraesCS1A03G0764100.1	1	TraesCS1A03G0764100	c.-114-3_-114-2insGGCTCCGCCCCCGATTTGCTCGCCTGGGCTGGTTGACGCGGCTGCGGCGGCGGTGGCGACCGGCGACTG
1A	444383228	510139024	68	0.714	0.2	-0.514	0.537	21	20	504860082	G	A	SNP	3_prime_UTR_variant	MODIFIER	TraesCS1A03G0774200.1	6	TraesCS1A03G0774200	c.*154C>T
1A	444383228	510139024	68	0.714	0.2	-0.514	0.537	21	20	504860082	G	A	SNP	3_prime_UTR_variant	MODIFIER	TraesCS1A03G0774200.2	7	TraesCS1A03G0774200	c.*154C>T
1A	444383228	510139024	68	0.714	0.2	-0.514	0.537	21	20	504860082	G	A	SNP	upstream_gene_variant	MODIFIER	TraesCS1A03G0774100.1	-1	TraesCS1A03G0774100	c.-2451C>T
1A	444383228	510139024	68	0.714	0.2	-0.514	0.537	21	20	504860082	G	A	SNP	downstream_gene_variant	MODIFIER	TraesCS1A03G0774000LC.1	-1	TraesCS1A03G0774000LC	c.*4833G>A
1A	444383228	510139024	68	0.714	0.2	-0.514	0.537	21	20	504860082	G	A	SNP	downstream_gene_variant	MODIFIER	TraesCS1A03G0774200.3	-1	TraesCS1A03G0774200	c.*126C>T
1A	444383228	510139024	68	0.965	0	-0.965	0.315	144	59	510139022	C	CTCG	INDEL	splice_region_variant&intron_variant	LOW	TraesCS1A03G0787500.1	1	TraesCS1A03G0787500	c.-15-7_-15-6insCGA
1A	444383228	510139024	68	0	0.98	0.98	0.744	144	51	510139024	C	CGATTCGGCGCCGGATTCCGGCG	INDEL	intron_variant	MODIFIER	TraesCS1A03G0787500.1	1	TraesCS1A03G0787500	c.-15-9_-15-8insCGCCGGAATCCGGCGCCGAATC
1A	456095685	541907632	38	0	0.923	0.923	0.736	65	26	456095686	G	GACCACAGGACAATGAGATGGCAA	INDEL	splice_donor_variant&intron_variant	HIGH	TraesCS1A03G0666500.3	1	TraesCS1A03G0666500	c.677_677+1insACCACAGGACAATGAGATGGCAA
1A	456095685	541907632	38	0	0.923	0.923	0.736	65	26	456095686	G	GACCACAGGACAATGAGATGGCAA	INDEL	splice_donor_variant&intron_variant	HIGH	TraesCS1A03G0666500.1	1	TraesCS1A03G0666500	c.677_677+1insACCACAGGACAATGAGATGGCAA
1A	456095685	541907632	38	0	0.923	0.923	0.736	65	26	456095686	G	GACCACAGGACAATGAGATGGCAA	INDEL	splice_donor_variant&intron_variant	HIGH	TraesCS1A03G0666500.2	1	TraesCS1A03G0666500	c.677_677+1insACCACAGGACAATGAGATGGCAA
1A	456095685	541907632	38	0	0.923	0.923	0.736	65	26	456095686	G	GACCACAGGACAATGAGATGGCAA	INDEL	upstream_gene_variant	MODIFIER	TraesCS1A03G0666600LC.1	-1	TraesCS1A03G0666600LC	c.-184_-183insTTGCCATCTCATTGTCCTGTGGT
1A	456095685	541907632	38	0	0.923	0.923	0.736	65	26	456095686	G	GACCACAGGACAATGAGATGGCAA	INDEL	upstream_gene_variant	MODIFIER	TraesCS1A03G0666700LC.1	-1	TraesCS1A03G0666700LC	c.-1096_-1095insACCACAGGACAATGAGATGGCAA
1A	456095685	541907632	38	0	0.923	0.923	0.736	65	26	456095686	G	GACCACAGGACAATGAGATGGCAA	INDEL	upstream_gene_variant	MODIFIER	TraesCS1A03G0666800.1	-1	TraesCS1A03G0666800	c.-5223_-5222insACCACAGGACAATGAGATGGCAA
1A	456095685	541907632	38	0	0.923	0.923	0.736	65	26	456095686	G	GACCACAGGACAATGAGATGGCAA	INDEL	upstream_gene_variant	MODIFIER	TraesCS1A03G0666800.2	-1	TraesCS1A03G0666800	c.-5223_-5222insACCACAGGACAATGAGATGGCAA
1A	456095685	541907632	38	0	0.923	0.923	0.736	65	26	456095686	G	GACCACAGGACAATGAGATGGCAA	INDEL	downstream_gene_variant	MODIFIER	TraesCS1A03G0666400.1	-1	TraesCS1A03G0666400	c.*1758_*1759insACCACAGGACAATGAGATGGCAA
1A	456095685	541907632	38	0	0.923	0.923	0.736	65	26	456095686	G	GACCACAGGACAATGAGATGGCAA	INDEL	downstream_gene_variant	MODIFIER	TraesCS1A03G0666400.2	-1	TraesCS1A03G0666400	c.*1972_*1973insACCACAGGACAATGAGATGGCAA
1A	456095685	541907632	38	0	0.85	0.85	0.609	94	80	456779283	G	GATTCACAA	INDEL	splice_donor_variant&intron_variant	HIGH	TraesCS1A03G0667700.2	4	TraesCS1A03G0667700	c.342_342+1insATTCACAA
1A	456095685	541907632	38	0	0.85	0.85	0.609	94	80	456779283	G	GATTCACAA	INDEL	splice_donor_variant&intron_variant	HIGH	TraesCS1A03G0667700.1	3	TraesCS1A03G0667700	c.279_279+1insATTCACAA
1A	456095685	541907632	38	0	0.85	0.85	0.609	94	80	456779283	G	GATTCACAA	INDEL	upstream_gene_variant	MODIFIER	TraesCS1A03G0667600LC.1	-1	TraesCS1A03G0667600LC	c.-3316_-3315insTTGTGAAT
1A	456095685	541907632	38	0	0.759	0.759	0.562	61	83	462581911	C	CAGGCGGAGAGGAGGCAGTTGAGGAGCGTCATGTTGTATGGCACCCCGGAGAATTCCTCTGTGGATTTG	INDEL	splice_acceptor_variant&intron_variant	HIGH	TraesCS1A03G0674900.1	3	TraesCS1A03G0674900	c.171-2_171-1insCAAATCCACAGAGGAATTCTCCGGGGTGCCATACAACATGACGCTCCTCAACTGCCTCCTCTCCGCCT
1A	456095685	541907632	38	0.952	0	-0.952	0.986	21	1415	463072094	G	GCCGACTTCTTCCCCAAGTGCTGCAACAACTGCA	INDEL	splice_donor_variant&intron_variant	HIGH	TraesCS1A03G0676400.1	1	TraesCS1A03G0676400	c.76_76+1insCCGACTTCTTCCCCAAGTGCTGCAACAACTGCA
1A	456095685	541907632	38	0.952	0	-0.952	0.986	21	1415	463072094	G	GCCGACTTCTTCCCCAAGTGCTGCAACAACTGCA	INDEL	downstream_gene_variant	MODIFIER	TraesCS1A03G0676300.1	-1	TraesCS1A03G0676300	c.*5148_*5149insCCGACTTCTTCCCCAAGTGCTGCAACAACTGCA
1A	456095685	541907632	38	0.3	0.8	0.5	0.467	40	35	464950019	G	A	SNP	missense_variant	MODERATE	TraesCS1A03G0681600.1	2	TraesCS1A03G0681600	c.442C>T	p.Pro148Ser
1A	456095685	541907632	38	1	0	-1	0.545	20	24	471040680	T	TGGG	INDEL	splice_region_variant&intron_variant	LOW	TraesCS1A03G0694300.1	1	TraesCS1A03G0694300	c.293-3_293-2insCCC
1A	456095685	541907632	38	1	0	-1	0.545	20	24	471040680	T	TGGG	INDEL	upstream_gene_variant	MODIFIER	TraesCS1A03G0694200.1	-1	TraesCS1A03G0694200	c.-4976_-4975insCCC
1A	456095685	541907632	38	1	0	-1	0.545	20	24	471040680	T	TGGG	INDEL	downstream_gene_variant	MODIFIER	TraesCS1A03G0694400LC.1	-1	TraesCS1A03G0694400LC	c.*136_*137insGGG
1A	456095685	541907632	38	0.963	0	-0.963	0.5	27	25	475265181	T	TTTCCAGAA	INDEL	splice_region_variant&intron_variant	LOW	TraesCS1A03G0701700.3	20	TraesCS1A03G0701700	c.5147-3_5147-2insTTCTGGAA
1A	456095685	541907632	38	0.963	0	-0.963	0.5	27	25	475265181	T	TTTCCAGAA	INDEL	splice_region_variant&intron_variant	LOW	TraesCS1A03G0701700.1	19	TraesCS1A03G0701700	c.*34-3_*34-2insTTCTGGAA
1A	456095685	541907632	38	0.963	0	-0.963	0.5	27	25	475265181	T	TTTCCAGAA	INDEL	splice_region_variant&intron_variant	LOW	TraesCS1A03G0701700.2	20	TraesCS1A03G0701700	c.*34-3_*34-2insTTCTGGAA
1A	456095685	541907632	38	0.963	0	-0.963	0.5	27	25	475265181	T	TTTCCAGAA	INDEL	upstream_gene_variant	MODIFIER	TraesCS1A03G0701600.1	-1	TraesCS1A03G0701600	c.-1577_-1576insTTCTGGAA
1A	456095685	541907632	38	0	0.966	0.966	0.467	48	59	482028766	C	CAGGACAAACTACTTCATCTT	INDEL	splice_region_variant&intron_variant	LOW	TraesCS1A03G0711700.1	1	TraesCS1A03G0711700	c.158+4_158+5insAGGACAAACTACTTCATCTT
1A	456095685	541907632	38	0	0.966	0.966	0.467	48	59	482028766	C	CAGGACAAACTACTTCATCTT	INDEL	downstream_gene_variant	MODIFIER	TraesCS1A03G0711800.1	-1	TraesCS1A03G0711800	c.*4378_*4379insAAGATGAAGTAGTTTGTCCT
1A	456095685	541907632	38	0	0.857	0.857	0.64	29	21	484346930	A	ATGATGGAGGCTACTTCAATGCAGTAAT	INDEL	splice_donor_variant&intron_variant	HIGH	TraesCS1A03G0718900.1	2	TraesCS1A03G0718900	c.155_155+1insTGATGGAGGCTACTTCAATGCAGTAAT
1A	456095685	541907632	38	0.962	0	-0.962	0.643	26	44	497828305	A	ACAAAGCG	INDEL	splice_region_variant&intron_variant	LOW	TraesCS1A03G0753000.2	20	TraesCS1A03G0753000	c.2490+5_2490+6insCAAAGCG
1A	456095685	541907632	38	0.962	0	-0.962	0.643	26	44	497828305	A	ACAAAGCG	INDEL	splice_region_variant&intron_variant	LOW	TraesCS1A03G0753000.1	19	TraesCS1A03G0753000	c.2319+5_2319+6insCAAAGCG
1A	456095685	541907632	38	0.962	0	-0.962	0.643	26	44	497828305	A	ACAAAGCG	INDEL	downstream_gene_variant	MODIFIER	TraesCS1A03G0753100LC.1	-1	TraesCS1A03G0753100LC	c.*91_*92insCGCTTTG
1A	456095685	541907632	38	0.962	0	-0.962	0.643	26	44	497828305	A	ACAAAGCG	INDEL	downstream_gene_variant	MODIFIER	TraesCS1A03G0753200.1	-1	TraesCS1A03G0753200	c.*1174_*1175insCGCTTTG
1A	456095685	541907632	38	0.727	0.261	-0.466	0.544	33	46	500039509	C	T	SNP	3_prime_UTR_variant	MODIFIER	TraesCS1A03G0761500.1	4	TraesCS1A03G0761500	c.*120C>T
1A	456095685	541907632	38	0.727	0.261	-0.466	0.544	33	46	500039509	C	T	SNP	downstream_gene_variant	MODIFIER	TraesCS1A03G0761600.1	-1	TraesCS1A03G0761600	c.*767G>A
1A	456095685	541907632	38	0.767	0	-0.767	0.558	30	22	500693618	T	TCAGTCGCCGGTCGCCACCGCCGCCGCAGCCGCGTCAACCAGCCCAGGCGAGCAAATCGGGGGCGGAGCC	INDEL	splice_region_variant&intron_variant	LOW	TraesCS1A03G0764100.1	1	TraesCS1A03G0764100	c.-114-3_-114-2insGGCTCCGCCCCCGATTTGCTCGCCTGGGCTGGTTGACGCGGCTGCGGCGGCGGTGGCGACCGGCGACTG
1A	456095685	541907632	38	0.714	0.2	-0.514	0.537	21	20	504860082	G	A	SNP	3_prime_UTR_variant	MODIFIER	TraesCS1A03G0774200.1	6	TraesCS1A03G0774200	c.*154C>T
1A	456095685	541907632	38	0.714	0.2	-0.514	0.537	21	20	504860082	G	A	SNP	3_prime_UTR_variant	MODIFIER	TraesCS1A03G0774200.2	7	TraesCS1A03G0774200	c.*154C>T
1A	456095685	541907632	38	0.714	0.2	-0.514	0.537	21	20	504860082	G	A	SNP	upstream_gene_variant	MODIFIER	TraesCS1A03G0774100.1	-1	TraesCS1A03G0774100	c.-2451C>T
1A	456095685	541907632	38	0.714	0.2	-0.514	0.537	21	20	504860082	G	A	SNP	downstream_gene_variant	MODIFIER	TraesCS1A03G0774000LC.1	-1	TraesCS1A03G0774000LC	c.*4833G>A
1A	456095685	541907632	38	0.714	0.2	-0.514	0.537	21	20	504860082	G	A	SNP	downstream_gene_variant	MODIFIER	TraesCS1A03G0774200.3	-1	TraesCS1A03G0774200	c.*126C>T
1A	456095685	541907632	38	0.965	0	-0.965	0.315	144	59	510139022	C	CTCG	INDEL	splice_region_variant&intron_variant	LOW	TraesCS1A03G0787500.1	1	TraesCS1A03G0787500	c.-15-7_-15-6insCGA
1A	456095685	541907632	38	0	0.98	0.98	0.744	144	51	510139024	C	CGATTCGGCGCCGGATTCCGGCG	INDEL	intron_variant	MODIFIER	TraesCS1A03G0787500.1	1	TraesCS1A03G0787500	c.-15-9_-15-8insCGCCGGAATCCGGCGCCGAATC
1A	456095685	541907632	38	0.804	0	-0.804	0.577	143	129	512571328	GGACCTTTAATACGATGGTGAGCAAAGATGCATGTGTGAATTCATTTCATGAAATCTTTCTCTACACACACTAGATAGTTCTCGAGCCTGACGAGCAGAGCATCACAGTGGGAGCTTGCACACTGTTGTCAACTGATAAACAGGGTTGCTGAGACT	G	INDEL	splice_acceptor_variant&conservative_inframe_deletion&splice_region_variant&intron_variant	HIGH	TraesCS1A03G0793500.1	3	TraesCS1A03G0793500	c.117+4_120del	p.Val40_Pro41del
1A	456095685	541907632	38	0.958	0	-0.958	0.674	48	93	533395453	G	GCAACTGATGACTCTCTGAAGAGTGTTAACC	INDEL	splice_donor_variant&intron_variant	HIGH	TraesCS1A03G0846100.1	14	TraesCS1A03G0846100	c.2244+1_2244+2insCAACTGATGACTCTCTGAAGAGTGTTAACC
1A	456095685	541907632	38	0.958	0	-0.958	0.674	48	93	533395453	G	GCAACTGATGACTCTCTGAAGAGTGTTAACC	INDEL	splice_donor_variant&intron_variant	HIGH	TraesCS1A03G0846100.2	14	TraesCS1A03G0846100	c.2160+1_2160+2insCAACTGATGACTCTCTGAAGAGTGTTAACC
1A	456095685	541907632	38	0	0.924	0.924	0.609	90	66	536738420	C	CACAAGCTACCGGGTTGAGGCACATCATGGACATCAACAACCATTTTTTCTGTTTTGACCAGATAA	INDEL	splice_acceptor_variant&intron_variant	HIGH	TraesCS1A03G0858300.1	3	TraesCS1A03G0858300	c.982-1_982insTTATCTGGTCAAAACAGAAAAAATGGTTGTTGATGTCCATGATGTGCCTCAACCCGGTAGCTTGT
1A	456095685	541907632	38	0	0.924	0.924	0.609	90	66	536738420	C	CACAAGCTACCGGGTTGAGGCACATCATGGACATCAACAACCATTTTTTCTGTTTTGACCAGATAA	INDEL	upstream_gene_variant	MODIFIER	TraesCS1A03G0858200LC.1	-1	TraesCS1A03G0858200LC	c.-3088_-3087insTTATCTGGTCAAAACAGAAAAAATGGTTGTTGATGTCCATGATGTGCCTCAACCCGGTAGCTTGT
1A	456095685	541907632	38	0	0.944	0.944	0.49	46	54	537018111	CGCAGGTGCGCCGGAGTTCTCCCCCGTTTCTCTTGTCCCCTGTTTCTCGCCGGACGCCGGCAAAGTTGCCAAATTATTGACTGTTACTGCAGTTCAGCTTGCACCCTTTGCTTGTACGGCTACGCTTGCTTAACGGACTCTTTTGCTTCCGCCCGTGCTT	C	INDEL	splice_donor_variant&splice_region_variant&5_prime_UTR_variant&intron_variant	HIGH	TraesCS1A03G0859800.1	1	TraesCS1A03G0859800	c.-168_-164-5del
1A	456095685	541907632	38	0	0.944	0.944	0.49	46	54	537018111	CGCAGGTGCGCCGGAGTTCTCCCCCGTTTCTCTTGTCCCCTGTTTCTCGCCGGACGCCGGCAAAGTTGCCAAATTATTGACTGTTACTGCAGTTCAGCTTGCACCCTTTGCTTGTACGGCTACGCTTGCTTAACGGACTCTTTTGCTTCCGCCCGTGCTT	C	INDEL	splice_donor_variant&splice_region_variant&5_prime_UTR_variant&intron_variant	HIGH	TraesCS1A03G0859800.2	1	TraesCS1A03G0859800	c.-168_-164-5del
1A	456095685	541907632	38	0	0.944	0.944	0.49	46	54	537018111	CGCAGGTGCGCCGGAGTTCTCCCCCGTTTCTCTTGTCCCCTGTTTCTCGCCGGACGCCGGCAAAGTTGCCAAATTATTGACTGTTACTGCAGTTCAGCTTGCACCCTTTGCTTGTACGGCTACGCTTGCTTAACGGACTCTTTTGCTTCCGCCCGTGCTT	C	INDEL	splice_region_variant	LOW	TraesCS1A03G0859800.1	1	TraesCS1A03G0859800	c.-168_-164-5del
1A	456095685	541907632	38	0	0.944	0.944	0.49	46	54	537018111	CGCAGGTGCGCCGGAGTTCTCCCCCGTTTCTCTTGTCCCCTGTTTCTCGCCGGACGCCGGCAAAGTTGCCAAATTATTGACTGTTACTGCAGTTCAGCTTGCACCCTTTGCTTGTACGGCTACGCTTGCTTAACGGACTCTTTTGCTTCCGCCCGTGCTT	C	INDEL	splice_region_variant	LOW	TraesCS1A03G0859800.2	1	TraesCS1A03G0859800	c.-168_-164-5del
1A	456095685	541907632	38	0	0.944	0.944	0.49	46	54	537018111	CGCAGGTGCGCCGGAGTTCTCCCCCGTTTCTCTTGTCCCCTGTTTCTCGCCGGACGCCGGCAAAGTTGCCAAATTATTGACTGTTACTGCAGTTCAGCTTGCACCCTTTGCTTGTACGGCTACGCTTGCTTAACGGACTCTTTTGCTTCCGCCCGTGCTT	C	INDEL	downstream_gene_variant	MODIFIER	TraesCS1A03G0859900.1	-1	TraesCS1A03G0859900	c.*2768_*2926del
1A	456095685	541907632	38	0	0.944	0.944	0.49	46	54	537018111	CGCAGGTGCGCCGGAGTTCTCCCCCGTTTCTCTTGTCCCCTGTTTCTCGCCGGACGCCGGCAAAGTTGCCAAATTATTGACTGTTACTGCAGTTCAGCTTGCACCCTTTGCTTGTACGGCTACGCTTGCTTAACGGACTCTTTTGCTTCCGCCCGTGCTT	C	INDEL	non_coding_transcript_variant	MODIFIER	TraesCS1A03G0859800.1	1	TraesCS1A03G0859800	c.-168_-164-5del
1A	456095685	541907632	38	0	0.944	0.944	0.49	46	54	537018111	CGCAGGTGCGCCGGAGTTCTCCCCCGTTTCTCTTGTCCCCTGTTTCTCGCCGGACGCCGGCAAAGTTGCCAAATTATTGACTGTTACTGCAGTTCAGCTTGCACCCTTTGCTTGTACGGCTACGCTTGCTTAACGGACTCTTTTGCTTCCGCCCGTGCTT	C	INDEL	non_coding_transcript_variant	MODIFIER	TraesCS1A03G0859800.2	1	TraesCS1A03G0859800	c.-168_-164-5del
1A	456095685	541907632	38	0	1	1	0.685	50	23	541907632	G	GCCGGCCCATCAGACCCCAAGCAATTCCCCTTCATTTTGGTCGGGAACAAGGTCGATCTGGACGC	INDEL	splice_donor_variant&intron_variant	HIGH	TraesCS1A03G0874700.1	4	TraesCS1A03G0874700	c.333+1_333+2insCCGGCCCATCAGACCCCAAGCAATTCCCCTTCATTTTGGTCGGGAACAAGGTCGATCTGGACGC
1A	456095685	541907632	38	0	1	1	0.685	50	23	541907632	G	GCCGGCCCATCAGACCCCAAGCAATTCCCCTTCATTTTGGTCGGGAACAAGGTCGATCTGGACGC	INDEL	upstream_gene_variant	MODIFIER	TraesCS1A03G0874600.1	-1	TraesCS1A03G0874600	c.-2960_-2959insGCGTCCAGATCGACCTTGTTCCCGACCAAAATGAAGGGGAATTGCTTGGGGTCTGATGGGCCGG
1A	456095685	541907632	38	0	1	1	0.685	50	23	541907632	G	GCCGGCCCATCAGACCCCAAGCAATTCCCCTTCATTTTGGTCGGGAACAAGGTCGATCTGGACGC	INDEL	upstream_gene_variant	MODIFIER	TraesCS1A03G0874600.2	-1	TraesCS1A03G0874600	c.-2960_-2959insGCGTCCAGATCGACCTTGTTCCCGACCAAAATGAAGGGGAATTGCTTGGGGTCTGATGGGCCGG
1A	471040679	549060081	42	1	0	-1	0.545	20	24	471040680	T	TGGG	INDEL	splice_region_variant&intron_variant	LOW	TraesCS1A03G0694300.1	1	TraesCS1A03G0694300	c.293-3_293-2insCCC
1A	471040679	549060081	42	1	0	-1	0.545	20	24	471040680	T	TGGG	INDEL	upstream_gene_variant	MODIFIER	TraesCS1A03G0694200.1	-1	TraesCS1A03G0694200	c.-4976_-4975insCCC
1A	471040679	549060081	42	1	0	-1	0.545	20	24	471040680	T	TGGG	INDEL	downstream_gene_variant	MODIFIER	TraesCS1A03G0694400LC.1	-1	TraesCS1A03G0694400LC	c.*136_*137insGGG
1A	471040679	549060081	42	0.963	0	-0.963	0.5	27	25	475265181	T	TTTCCAGAA	INDEL	splice_region_variant&intron_variant	LOW	TraesCS1A03G0701700.3	20	TraesCS1A03G0701700	c.5147-3_5147-2insTTCTGGAA
1A	471040679	549060081	42	0.963	0	-0.963	0.5	27	25	475265181	T	TTTCCAGAA	INDEL	splice_region_variant&intron_variant	LOW	TraesCS1A03G0701700.1	19	TraesCS1A03G0701700	c.*34-3_*34-2insTTCTGGAA
1A	471040679	549060081	42	0.963	0	-0.963	0.5	27	25	475265181	T	TTTCCAGAA	INDEL	splice_region_variant&intron_variant	LOW	TraesCS1A03G0701700.2	20	TraesCS1A03G0701700	c.*34-3_*34-2insTTCTGGAA
1A	471040679	549060081	42	0.963	0	-0.963	0.5	27	25	475265181	T	TTTCCAGAA	INDEL	upstream_gene_variant	MODIFIER	TraesCS1A03G0701600.1	-1	TraesCS1A03G0701600	c.-1577_-1576insTTCTGGAA
1A	471040679	549060081	42	0	0.966	0.966	0.467	48	59	482028766	C	CAGGACAAACTACTTCATCTT	INDEL	splice_region_variant&intron_variant	LOW	TraesCS1A03G0711700.1	1	TraesCS1A03G0711700	c.158+4_158+5insAGGACAAACTACTTCATCTT
1A	471040679	549060081	42	0	0.966	0.966	0.467	48	59	482028766	C	CAGGACAAACTACTTCATCTT	INDEL	downstream_gene_variant	MODIFIER	TraesCS1A03G0711800.1	-1	TraesCS1A03G0711800	c.*4378_*4379insAAGATGAAGTAGTTTGTCCT
1A	471040679	549060081	42	0	0.857	0.857	0.64	29	21	484346930	A	ATGATGGAGGCTACTTCAATGCAGTAAT	INDEL	splice_donor_variant&intron_variant	HIGH	TraesCS1A03G0718900.1	2	TraesCS1A03G0718900	c.155_155+1insTGATGGAGGCTACTTCAATGCAGTAAT
1A	471040679	549060081	42	0.962	0	-0.962	0.643	26	44	497828305	A	ACAAAGCG	INDEL	splice_region_variant&intron_variant	LOW	TraesCS1A03G0753000.2	20	TraesCS1A03G0753000	c.2490+5_2490+6insCAAAGCG
1A	471040679	549060081	42	0.962	0	-0.962	0.643	26	44	497828305	A	ACAAAGCG	INDEL	splice_region_variant&intron_variant	LOW	TraesCS1A03G0753000.1	19	TraesCS1A03G0753000	c.2319+5_2319+6insCAAAGCG
1A	471040679	549060081	42	0.962	0	-0.962	0.643	26	44	497828305	A	ACAAAGCG	INDEL	downstream_gene_variant	MODIFIER	TraesCS1A03G0753100LC.1	-1	TraesCS1A03G0753100LC	c.*91_*92insCGCTTTG
1A	471040679	549060081	42	0.962	0	-0.962	0.643	26	44	497828305	A	ACAAAGCG	INDEL	downstream_gene_variant	MODIFIER	TraesCS1A03G0753200.1	-1	TraesCS1A03G0753200	c.*1174_*1175insCGCTTTG
1A	471040679	549060081	42	0.727	0.261	-0.466	0.544	33	46	500039509	C	T	SNP	3_prime_UTR_variant	MODIFIER	TraesCS1A03G0761500.1	4	TraesCS1A03G0761500	c.*120C>T
1A	471040679	549060081	42	0.727	0.261	-0.466	0.544	33	46	500039509	C	T	SNP	downstream_gene_variant	MODIFIER	TraesCS1A03G0761600.1	-1	TraesCS1A03G0761600	c.*767G>A
1A	471040679	549060081	42	0.767	0	-0.767	0.558	30	22	500693618	T	TCAGTCGCCGGTCGCCACCGCCGCCGCAGCCGCGTCAACCAGCCCAGGCGAGCAAATCGGGGGCGGAGCC	INDEL	splice_region_variant&intron_variant	LOW	TraesCS1A03G0764100.1	1	TraesCS1A03G0764100	c.-114-3_-114-2insGGCTCCGCCCCCGATTTGCTCGCCTGGGCTGGTTGACGCGGCTGCGGCGGCGGTGGCGACCGGCGACTG
1A	471040679	549060081	42	0.714	0.2	-0.514	0.537	21	20	504860082	G	A	SNP	3_prime_UTR_variant	MODIFIER	TraesCS1A03G0774200.1	6	TraesCS1A03G0774200	c.*154C>T
1A	471040679	549060081	42	0.714	0.2	-0.514	0.537	21	20	504860082	G	A	SNP	3_prime_UTR_variant	MODIFIER	TraesCS1A03G0774200.2	7	TraesCS1A03G0774200	c.*154C>T
1A	471040679	549060081	42	0.714	0.2	-0.514	0.537	21	20	504860082	G	A	SNP	upstream_gene_variant	MODIFIER	TraesCS1A03G0774100.1	-1	TraesCS1A03G0774100	c.-2451C>T
1A	471040679	549060081	42	0.714	0.2	-0.514	0.537	21	20	504860082	G	A	SNP	downstream_gene_variant	MODIFIER	TraesCS1A03G0774000LC.1	-1	TraesCS1A03G0774000LC	c.*4833G>A
1A	471040679	549060081	42	0.714	0.2	-0.514	0.537	21	20	504860082	G	A	SNP	downstream_gene_variant	MODIFIER	TraesCS1A03G0774200.3	-1	TraesCS1A03G0774200	c.*126C>T
1A	471040679	549060081	42	0.965	0	-0.965	0.315	144	59	510139022	C	CTCG	INDEL	splice_region_variant&intron_variant	LOW	TraesCS1A03G0787500.1	1	TraesCS1A03G0787500	c.-15-7_-15-6insCGA
1A	471040679	549060081	42	0	0.98	0.98	0.744	144	51	510139024	C	CGATTCGGCGCCGGATTCCGGCG	INDEL	intron_variant	MODIFIER	TraesCS1A03G0787500.1	1	TraesCS1A03G0787500	c.-15-9_-15-8insCGCCGGAATCCGGCGCCGAATC
1A	471040679	549060081	42	0.804	0	-0.804	0.577	143	129	512571328	GGACCTTTAATACGATGGTGAGCAAAGATGCATGTGTGAATTCATTTCATGAAATCTTTCTCTACACACACTAGATAGTTCTCGAGCCTGACGAGCAGAGCATCACAGTGGGAGCTTGCACACTGTTGTCAACTGATAAACAGGGTTGCTGAGACT	G	INDEL	splice_acceptor_variant&conservative_inframe_deletion&splice_region_variant&intron_variant	HIGH	TraesCS1A03G0793500.1	3	TraesCS1A03G0793500	c.117+4_120del	p.Val40_Pro41del
1A	471040679	549060081	42	0.958	0	-0.958	0.674	48	93	533395453	G	GCAACTGATGACTCTCTGAAGAGTGTTAACC	INDEL	splice_donor_variant&intron_variant	HIGH	TraesCS1A03G0846100.1	14	TraesCS1A03G0846100	c.2244+1_2244+2insCAACTGATGACTCTCTGAAGAGTGTTAACC
1A	471040679	549060081	42	0.958	0	-0.958	0.674	48	93	533395453	G	GCAACTGATGACTCTCTGAAGAGTGTTAACC	INDEL	splice_donor_variant&intron_variant	HIGH	TraesCS1A03G0846100.2	14	TraesCS1A03G0846100	c.2160+1_2160+2insCAACTGATGACTCTCTGAAGAGTGTTAACC
1A	471040679	549060081	42	0	0.924	0.924	0.609	90	66	536738420	C	CACAAGCTACCGGGTTGAGGCACATCATGGACATCAACAACCATTTTTTCTGTTTTGACCAGATAA	INDEL	splice_acceptor_variant&intron_variant	HIGH	TraesCS1A03G0858300.1	3	TraesCS1A03G0858300	c.982-1_982insTTATCTGGTCAAAACAGAAAAAATGGTTGTTGATGTCCATGATGTGCCTCAACCCGGTAGCTTGT
1A	471040679	549060081	42	0	0.924	0.924	0.609	90	66	536738420	C	CACAAGCTACCGGGTTGAGGCACATCATGGACATCAACAACCATTTTTTCTGTTTTGACCAGATAA	INDEL	upstream_gene_variant	MODIFIER	TraesCS1A03G0858200LC.1	-1	TraesCS1A03G0858200LC	c.-3088_-3087insTTATCTGGTCAAAACAGAAAAAATGGTTGTTGATGTCCATGATGTGCCTCAACCCGGTAGCTTGT
1A	471040679	549060081	42	0	0.944	0.944	0.49	46	54	537018111	CGCAGGTGCGCCGGAGTTCTCCCCCGTTTCTCTTGTCCCCTGTTTCTCGCCGGACGCCGGCAAAGTTGCCAAATTATTGACTGTTACTGCAGTTCAGCTTGCACCCTTTGCTTGTACGGCTACGCTTGCTTAACGGACTCTTTTGCTTCCGCCCGTGCTT	C	INDEL	splice_donor_variant&splice_region_variant&5_prime_UTR_variant&intron_variant	HIGH	TraesCS1A03G0859800.1	1	TraesCS1A03G0859800	c.-168_-164-5del
1A	471040679	549060081	42	0	0.944	0.944	0.49	46	54	537018111	CGCAGGTGCGCCGGAGTTCTCCCCCGTTTCTCTTGTCCCCTGTTTCTCGCCGGACGCCGGCAAAGTTGCCAAATTATTGACTGTTACTGCAGTTCAGCTTGCACCCTTTGCTTGTACGGCTACGCTTGCTTAACGGACTCTTTTGCTTCCGCCCGTGCTT	C	INDEL	splice_donor_variant&splice_region_variant&5_prime_UTR_variant&intron_variant	HIGH	TraesCS1A03G0859800.2	1	TraesCS1A03G0859800	c.-168_-164-5del
1A	471040679	549060081	42	0	0.944	0.944	0.49	46	54	537018111	CGCAGGTGCGCCGGAGTTCTCCCCCGTTTCTCTTGTCCCCTGTTTCTCGCCGGACGCCGGCAAAGTTGCCAAATTATTGACTGTTACTGCAGTTCAGCTTGCACCCTTTGCTTGTACGGCTACGCTTGCTTAACGGACTCTTTTGCTTCCGCCCGTGCTT	C	INDEL	splice_region_variant	LOW	TraesCS1A03G0859800.1	1	TraesCS1A03G0859800	c.-168_-164-5del
1A	471040679	549060081	42	0	0.944	0.944	0.49	46	54	537018111	CGCAGGTGCGCCGGAGTTCTCCCCCGTTTCTCTTGTCCCCTGTTTCTCGCCGGACGCCGGCAAAGTTGCCAAATTATTGACTGTTACTGCAGTTCAGCTTGCACCCTTTGCTTGTACGGCTACGCTTGCTTAACGGACTCTTTTGCTTCCGCCCGTGCTT	C	INDEL	splice_region_variant	LOW	TraesCS1A03G0859800.2	1	TraesCS1A03G0859800	c.-168_-164-5del
1A	471040679	549060081	42	0	0.944	0.944	0.49	46	54	537018111	CGCAGGTGCGCCGGAGTTCTCCCCCGTTTCTCTTGTCCCCTGTTTCTCGCCGGACGCCGGCAAAGTTGCCAAATTATTGACTGTTACTGCAGTTCAGCTTGCACCCTTTGCTTGTACGGCTACGCTTGCTTAACGGACTCTTTTGCTTCCGCCCGTGCTT	C	INDEL	downstream_gene_variant	MODIFIER	TraesCS1A03G0859900.1	-1	TraesCS1A03G0859900	c.*2768_*2926del
1A	471040679	549060081	42	0	0.944	0.944	0.49	46	54	537018111	CGCAGGTGCGCCGGAGTTCTCCCCCGTTTCTCTTGTCCCCTGTTTCTCGCCGGACGCCGGCAAAGTTGCCAAATTATTGACTGTTACTGCAGTTCAGCTTGCACCCTTTGCTTGTACGGCTACGCTTGCTTAACGGACTCTTTTGCTTCCGCCCGTGCTT	C	INDEL	non_coding_transcript_variant	MODIFIER	TraesCS1A03G0859800.1	1	TraesCS1A03G0859800	c.-168_-164-5del
1A	471040679	549060081	42	0	0.944	0.944	0.49	46	54	537018111	CGCAGGTGCGCCGGAGTTCTCCCCCGTTTCTCTTGTCCCCTGTTTCTCGCCGGACGCCGGCAAAGTTGCCAAATTATTGACTGTTACTGCAGTTCAGCTTGCACCCTTTGCTTGTACGGCTACGCTTGCTTAACGGACTCTTTTGCTTCCGCCCGTGCTT	C	INDEL	non_coding_transcript_variant	MODIFIER	TraesCS1A03G0859800.2	1	TraesCS1A03G0859800	c.-168_-164-5del
1A	471040679	549060081	42	0	1	1	0.685	50	23	541907632	G	GCCGGCCCATCAGACCCCAAGCAATTCCCCTTCATTTTGGTCGGGAACAAGGTCGATCTGGACGC	INDEL	splice_donor_variant&intron_variant	HIGH	TraesCS1A03G0874700.1	4	TraesCS1A03G0874700	c.333+1_333+2insCCGGCCCATCAGACCCCAAGCAATTCCCCTTCATTTTGGTCGGGAACAAGGTCGATCTGGACGC
1A	471040679	549060081	42	0	1	1	0.685	50	23	541907632	G	GCCGGCCCATCAGACCCCAAGCAATTCCCCTTCATTTTGGTCGGGAACAAGGTCGATCTGGACGC	INDEL	upstream_gene_variant	MODIFIER	TraesCS1A03G0874600.1	-1	TraesCS1A03G0874600	c.-2960_-2959insGCGTCCAGATCGACCTTGTTCCCGACCAAAATGAAGGGGAATTGCTTGGGGTCTGATGGGCCGG
1A	471040679	549060081	42	0	1	1	0.685	50	23	541907632	G	GCCGGCCCATCAGACCCCAAGCAATTCCCCTTCATTTTGGTCGGGAACAAGGTCGATCTGGACGC	INDEL	upstream_gene_variant	MODIFIER	TraesCS1A03G0874600.2	-1	TraesCS1A03G0874600	c.-2960_-2959insGCGTCCAGATCGACCTTGTTCCCGACCAAAATGAAGGGGAATTGCTTGGGGTCTGATGGGCCGG
1A	471040679	549060081	42	0	1	1	0.635	87	50	542378738	GCATA	G	INDEL	upstream_gene_variant	MODIFIER	TraesCS1A03G0876600.1	-1	TraesCS1A03G0876600	c.-1477_-1474delCATA
1A	471040679	549060081	42	0	1	1	0.635	87	50	542378738	GCATA	G	INDEL	intergenic_region	MODIFIER	TraesCS1A03G0876500-TraesCS1A03G0876600	-1	TraesCS1A03G0876500-TraesCS1A03G0876600	n.542378739_542378742delCATA
1A	471040679	549060081	42	0	1	1	0.599	103	69	542378786	AGGGAACTTGC	A	INDEL	upstream_gene_variant	MODIFIER	TraesCS1A03G0876600.1	-1	TraesCS1A03G0876600	c.-1429_-1420delGGGAACTTGC
1A	471040679	549060081	42	0	1	1	0.599	103	69	542378786	AGGGAACTTGC	A	INDEL	intergenic_region	MODIFIER	TraesCS1A03G0876500-TraesCS1A03G0876600	-1	TraesCS1A03G0876500-TraesCS1A03G0876600	n.542378787_542378796delGGGAACTTGC
1A	471040679	549060081	42	0.7	0.239	-0.461	0.621	20	46	545667292	A	C	SNP	3_prime_UTR_variant	MODIFIER	TraesCS1A03G0885500.1	5	TraesCS1A03G0885500	c.*44T>G
1A	471040679	549060081	42	0.7	0.239	-0.461	0.621	20	46	545667292	A	C	SNP	downstream_gene_variant	MODIFIER	TraesCS1A03G0885400.1	-1	TraesCS1A03G0885400	c.*1057A>C
1A	471040679	549060081	42	0.8	0.273	-0.527	0.447	25	22	545791214	T	C	SNP	upstream_gene_variant	MODIFIER	TraesCS1A03G0886300.1	-1	TraesCS1A03G0886300	c.-896A>G
1A	471040679	549060081	42	0.8	0.273	-0.527	0.447	25	22	545791214	T	C	SNP	downstream_gene_variant	MODIFIER	TraesCS1A03G0886400.2	-1	TraesCS1A03G0886400	c.*1044A>G
1A	471040679	549060081	42	0.8	0.273	-0.527	0.447	25	22	545791214	T	C	SNP	downstream_gene_variant	MODIFIER	TraesCS1A03G0886400.1	-1	TraesCS1A03G0886400	c.*1044A>G
1A	471040679	549060081	42	0.8	0.273	-0.527	0.447	25	22	545791214	T	C	SNP	downstream_gene_variant	MODIFIER	TraesCS1A03G0886400.3	-1	TraesCS1A03G0886400	c.*1044A>G
1A	471040679	549060081	42	0.8	0.273	-0.527	0.447	25	22	545791214	T	C	SNP	downstream_gene_variant	MODIFIER	TraesCS1A03G0886400.4	-1	TraesCS1A03G0886400	c.*1044A>G
1A	471040679	549060081	42	0.8	0.273	-0.527	0.447	25	22	545791214	T	C	SNP	intergenic_region	MODIFIER	TraesCS1A03G0886300-TraesCS1A03G0886400	-1	TraesCS1A03G0886300-TraesCS1A03G0886400	n.545791214T>C
1A	471040679	549060081	42	0.846	0	-0.846	0.398	91	37	549060081	G	GGTCGGTGCGGTCTTCGGCGACAAC	INDEL	splice_region_variant&intron_variant	LOW	TraesCS1A03G0896800.1	9	TraesCS1A03G0896800	c.1336-4_1336-3insGTTGTCGCCGAAGACCGCACCGAC
1A	471040679	549060081	42	0.846	0	-0.846	0.398	91	37	549060081	G	GGTCGGTGCGGTCTTCGGCGACAAC	INDEL	splice_region_variant&intron_variant	LOW	TraesCS1A03G0896800.2	10	TraesCS1A03G0896800	c.1327-4_1327-3insGTTGTCGCCGAAGACCGCACCGAC
1A	500039508	551361789	67	0.727	0.261	-0.466	0.544	33	46	500039509	C	T	SNP	3_prime_UTR_variant	MODIFIER	TraesCS1A03G0761500.1	4	TraesCS1A03G0761500	c.*120C>T
1A	500039508	551361789	67	0.727	0.261	-0.466	0.544	33	46	500039509	C	T	SNP	downstream_gene_variant	MODIFIER	TraesCS1A03G0761600.1	-1	TraesCS1A03G0761600	c.*767G>A
1A	500039508	551361789	67	0.767	0	-0.767	0.558	30	22	500693618	T	TCAGTCGCCGGTCGCCACCGCCGCCGCAGCCGCGTCAACCAGCCCAGGCGAGCAAATCGGGGGCGGAGCC	INDEL	splice_region_variant&intron_variant	LOW	TraesCS1A03G0764100.1	1	TraesCS1A03G0764100	c.-114-3_-114-2insGGCTCCGCCCCCGATTTGCTCGCCTGGGCTGGTTGACGCGGCTGCGGCGGCGGTGGCGACCGGCGACTG
1A	500039508	551361789	67	0.714	0.2	-0.514	0.537	21	20	504860082	G	A	SNP	3_prime_UTR_variant	MODIFIER	TraesCS1A03G0774200.1	6	TraesCS1A03G0774200	c.*154C>T
1A	500039508	551361789	67	0.714	0.2	-0.514	0.537	21	20	504860082	G	A	SNP	3_prime_UTR_variant	MODIFIER	TraesCS1A03G0774200.2	7	TraesCS1A03G0774200	c.*154C>T
1A	500039508	551361789	67	0.714	0.2	-0.514	0.537	21	20	504860082	G	A	SNP	upstream_gene_variant	MODIFIER	TraesCS1A03G0774100.1	-1	TraesCS1A03G0774100	c.-2451C>T
1A	500039508	551361789	67	0.714	0.2	-0.514	0.537	21	20	504860082	G	A	SNP	downstream_gene_variant	MODIFIER	TraesCS1A03G0774000LC.1	-1	TraesCS1A03G0774000LC	c.*4833G>A
1A	500039508	551361789	67	0.714	0.2	-0.514	0.537	21	20	504860082	G	A	SNP	downstream_gene_variant	MODIFIER	TraesCS1A03G0774200.3	-1	TraesCS1A03G0774200	c.*126C>T
1A	500039508	551361789	67	0.965	0	-0.965	0.315	144	59	510139022	C	CTCG	INDEL	splice_region_variant&intron_variant	LOW	TraesCS1A03G0787500.1	1	TraesCS1A03G0787500	c.-15-7_-15-6insCGA
1A	500039508	551361789	67	0	0.98	0.98	0.744	144	51	510139024	C	CGATTCGGCGCCGGATTCCGGCG	INDEL	intron_variant	MODIFIER	TraesCS1A03G0787500.1	1	TraesCS1A03G0787500	c.-15-9_-15-8insCGCCGGAATCCGGCGCCGAATC
1A	500039508	551361789	67	0.804	0	-0.804	0.577	143	129	512571328	GGACCTTTAATACGATGGTGAGCAAAGATGCATGTGTGAATTCATTTCATGAAATCTTTCTCTACACACACTAGATAGTTCTCGAGCCTGACGAGCAGAGCATCACAGTGGGAGCTTGCACACTGTTGTCAACTGATAAACAGGGTTGCTGAGACT	G	INDEL	splice_acceptor_variant&conservative_inframe_deletion&splice_region_variant&intron_variant	HIGH	TraesCS1A03G0793500.1	3	TraesCS1A03G0793500	c.117+4_120del	p.Val40_Pro41del
1A	500039508	551361789	67	0.958	0	-0.958	0.674	48	93	533395453	G	GCAACTGATGACTCTCTGAAGAGTGTTAACC	INDEL	splice_donor_variant&intron_variant	HIGH	TraesCS1A03G0846100.1	14	TraesCS1A03G0846100	c.2244+1_2244+2insCAACTGATGACTCTCTGAAGAGTGTTAACC
1A	500039508	551361789	67	0.958	0	-0.958	0.674	48	93	533395453	G	GCAACTGATGACTCTCTGAAGAGTGTTAACC	INDEL	splice_donor_variant&intron_variant	HIGH	TraesCS1A03G0846100.2	14	TraesCS1A03G0846100	c.2160+1_2160+2insCAACTGATGACTCTCTGAAGAGTGTTAACC
1A	500039508	551361789	67	0	0.924	0.924	0.609	90	66	536738420	C	CACAAGCTACCGGGTTGAGGCACATCATGGACATCAACAACCATTTTTTCTGTTTTGACCAGATAA	INDEL	splice_acceptor_variant&intron_variant	HIGH	TraesCS1A03G0858300.1	3	TraesCS1A03G0858300	c.982-1_982insTTATCTGGTCAAAACAGAAAAAATGGTTGTTGATGTCCATGATGTGCCTCAACCCGGTAGCTTGT
1A	500039508	551361789	67	0	0.924	0.924	0.609	90	66	536738420	C	CACAAGCTACCGGGTTGAGGCACATCATGGACATCAACAACCATTTTTTCTGTTTTGACCAGATAA	INDEL	upstream_gene_variant	MODIFIER	TraesCS1A03G0858200LC.1	-1	TraesCS1A03G0858200LC	c.-3088_-3087insTTATCTGGTCAAAACAGAAAAAATGGTTGTTGATGTCCATGATGTGCCTCAACCCGGTAGCTTGT
1A	500039508	551361789	67	0	0.944	0.944	0.49	46	54	537018111	CGCAGGTGCGCCGGAGTTCTCCCCCGTTTCTCTTGTCCCCTGTTTCTCGCCGGACGCCGGCAAAGTTGCCAAATTATTGACTGTTACTGCAGTTCAGCTTGCACCCTTTGCTTGTACGGCTACGCTTGCTTAACGGACTCTTTTGCTTCCGCCCGTGCTT	C	INDEL	splice_donor_variant&splice_region_variant&5_prime_UTR_variant&intron_variant	HIGH	TraesCS1A03G0859800.1	1	TraesCS1A03G0859800	c.-168_-164-5del
1A	500039508	551361789	67	0	0.944	0.944	0.49	46	54	537018111	CGCAGGTGCGCCGGAGTTCTCCCCCGTTTCTCTTGTCCCCTGTTTCTCGCCGGACGCCGGCAAAGTTGCCAAATTATTGACTGTTACTGCAGTTCAGCTTGCACCCTTTGCTTGTACGGCTACGCTTGCTTAACGGACTCTTTTGCTTCCGCCCGTGCTT	C	INDEL	splice_donor_variant&splice_region_variant&5_prime_UTR_variant&intron_variant	HIGH	TraesCS1A03G0859800.2	1	TraesCS1A03G0859800	c.-168_-164-5del
1A	500039508	551361789	67	0	0.944	0.944	0.49	46	54	537018111	CGCAGGTGCGCCGGAGTTCTCCCCCGTTTCTCTTGTCCCCTGTTTCTCGCCGGACGCCGGCAAAGTTGCCAAATTATTGACTGTTACTGCAGTTCAGCTTGCACCCTTTGCTTGTACGGCTACGCTTGCTTAACGGACTCTTTTGCTTCCGCCCGTGCTT	C	INDEL	splice_region_variant	LOW	TraesCS1A03G0859800.1	1	TraesCS1A03G0859800	c.-168_-164-5del
1A	500039508	551361789	67	0	0.944	0.944	0.49	46	54	537018111	CGCAGGTGCGCCGGAGTTCTCCCCCGTTTCTCTTGTCCCCTGTTTCTCGCCGGACGCCGGCAAAGTTGCCAAATTATTGACTGTTACTGCAGTTCAGCTTGCACCCTTTGCTTGTACGGCTACGCTTGCTTAACGGACTCTTTTGCTTCCGCCCGTGCTT	C	INDEL	splice_region_variant	LOW	TraesCS1A03G0859800.2	1	TraesCS1A03G0859800	c.-168_-164-5del
1A	500039508	551361789	67	0	0.944	0.944	0.49	46	54	537018111	CGCAGGTGCGCCGGAGTTCTCCCCCGTTTCTCTTGTCCCCTGTTTCTCGCCGGACGCCGGCAAAGTTGCCAAATTATTGACTGTTACTGCAGTTCAGCTTGCACCCTTTGCTTGTACGGCTACGCTTGCTTAACGGACTCTTTTGCTTCCGCCCGTGCTT	C	INDEL	downstream_gene_variant	MODIFIER	TraesCS1A03G0859900.1	-1	TraesCS1A03G0859900	c.*2768_*2926del
1A	500039508	551361789	67	0	0.944	0.944	0.49	46	54	537018111	CGCAGGTGCGCCGGAGTTCTCCCCCGTTTCTCTTGTCCCCTGTTTCTCGCCGGACGCCGGCAAAGTTGCCAAATTATTGACTGTTACTGCAGTTCAGCTTGCACCCTTTGCTTGTACGGCTACGCTTGCTTAACGGACTCTTTTGCTTCCGCCCGTGCTT	C	INDEL	non_coding_transcript_variant	MODIFIER	TraesCS1A03G0859800.1	1	TraesCS1A03G0859800	c.-168_-164-5del
1A	500039508	551361789	67	0	0.944	0.944	0.49	46	54	537018111	CGCAGGTGCGCCGGAGTTCTCCCCCGTTTCTCTTGTCCCCTGTTTCTCGCCGGACGCCGGCAAAGTTGCCAAATTATTGACTGTTACTGCAGTTCAGCTTGCACCCTTTGCTTGTACGGCTACGCTTGCTTAACGGACTCTTTTGCTTCCGCCCGTGCTT	C	INDEL	non_coding_transcript_variant	MODIFIER	TraesCS1A03G0859800.2	1	TraesCS1A03G0859800	c.-168_-164-5del
1A	500039508	551361789	67	0	1	1	0.685	50	23	541907632	G	GCCGGCCCATCAGACCCCAAGCAATTCCCCTTCATTTTGGTCGGGAACAAGGTCGATCTGGACGC	INDEL	splice_donor_variant&intron_variant	HIGH	TraesCS1A03G0874700.1	4	TraesCS1A03G0874700	c.333+1_333+2insCCGGCCCATCAGACCCCAAGCAATTCCCCTTCATTTTGGTCGGGAACAAGGTCGATCTGGACGC
1A	500039508	551361789	67	0	1	1	0.685	50	23	541907632	G	GCCGGCCCATCAGACCCCAAGCAATTCCCCTTCATTTTGGTCGGGAACAAGGTCGATCTGGACGC	INDEL	upstream_gene_variant	MODIFIER	TraesCS1A03G0874600.1	-1	TraesCS1A03G0874600	c.-2960_-2959insGCGTCCAGATCGACCTTGTTCCCGACCAAAATGAAGGGGAATTGCTTGGGGTCTGATGGGCCGG
1A	500039508	551361789	67	0	1	1	0.685	50	23	541907632	G	GCCGGCCCATCAGACCCCAAGCAATTCCCCTTCATTTTGGTCGGGAACAAGGTCGATCTGGACGC	INDEL	upstream_gene_variant	MODIFIER	TraesCS1A03G0874600.2	-1	TraesCS1A03G0874600	c.-2960_-2959insGCGTCCAGATCGACCTTGTTCCCGACCAAAATGAAGGGGAATTGCTTGGGGTCTGATGGGCCGG
1A	500039508	551361789	67	0	1	1	0.635	87	50	542378738	GCATA	G	INDEL	upstream_gene_variant	MODIFIER	TraesCS1A03G0876600.1	-1	TraesCS1A03G0876600	c.-1477_-1474delCATA
1A	500039508	551361789	67	0	1	1	0.635	87	50	542378738	GCATA	G	INDEL	intergenic_region	MODIFIER	TraesCS1A03G0876500-TraesCS1A03G0876600	-1	TraesCS1A03G0876500-TraesCS1A03G0876600	n.542378739_542378742delCATA
1A	500039508	551361789	67	0	1	1	0.599	103	69	542378786	AGGGAACTTGC	A	INDEL	upstream_gene_variant	MODIFIER	TraesCS1A03G0876600.1	-1	TraesCS1A03G0876600	c.-1429_-1420delGGGAACTTGC
1A	500039508	551361789	67	0	1	1	0.599	103	69	542378786	AGGGAACTTGC	A	INDEL	intergenic_region	MODIFIER	TraesCS1A03G0876500-TraesCS1A03G0876600	-1	TraesCS1A03G0876500-TraesCS1A03G0876600	n.542378787_542378796delGGGAACTTGC
1A	500039508	551361789	67	0.7	0.239	-0.461	0.621	20	46	545667292	A	C	SNP	3_prime_UTR_variant	MODIFIER	TraesCS1A03G0885500.1	5	TraesCS1A03G0885500	c.*44T>G
1A	500039508	551361789	67	0.7	0.239	-0.461	0.621	20	46	545667292	A	C	SNP	downstream_gene_variant	MODIFIER	TraesCS1A03G0885400.1	-1	TraesCS1A03G0885400	c.*1057A>C
1A	500039508	551361789	67	0.8	0.273	-0.527	0.447	25	22	545791214	T	C	SNP	upstream_gene_variant	MODIFIER	TraesCS1A03G0886300.1	-1	TraesCS1A03G0886300	c.-896A>G
1A	500039508	551361789	67	0.8	0.273	-0.527	0.447	25	22	545791214	T	C	SNP	downstream_gene_variant	MODIFIER	TraesCS1A03G0886400.2	-1	TraesCS1A03G0886400	c.*1044A>G
1A	500039508	551361789	67	0.8	0.273	-0.527	0.447	25	22	545791214	T	C	SNP	downstream_gene_variant	MODIFIER	TraesCS1A03G0886400.1	-1	TraesCS1A03G0886400	c.*1044A>G
1A	500039508	551361789	67	0.8	0.273	-0.527	0.447	25	22	545791214	T	C	SNP	downstream_gene_variant	MODIFIER	TraesCS1A03G0886400.3	-1	TraesCS1A03G0886400	c.*1044A>G
1A	500039508	551361789	67	0.8	0.273	-0.527	0.447	25	22	545791214	T	C	SNP	downstream_gene_variant	MODIFIER	TraesCS1A03G0886400.4	-1	TraesCS1A03G0886400	c.*1044A>G
1A	500039508	551361789	67	0.8	0.273	-0.527	0.447	25	22	545791214	T	C	SNP	intergenic_region	MODIFIER	TraesCS1A03G0886300-TraesCS1A03G0886400	-1	TraesCS1A03G0886300-TraesCS1A03G0886400	n.545791214T>C
1A	500039508	551361789	67	0.846	0	-0.846	0.398	91	37	549060081	G	GGTCGGTGCGGTCTTCGGCGACAAC	INDEL	splice_region_variant&intron_variant	LOW	TraesCS1A03G0896800.1	9	TraesCS1A03G0896800	c.1336-4_1336-3insGTTGTCGCCGAAGACCGCACCGAC
1A	500039508	551361789	67	0.846	0	-0.846	0.398	91	37	549060081	G	GGTCGGTGCGGTCTTCGGCGACAAC	INDEL	splice_region_variant&intron_variant	LOW	TraesCS1A03G0896800.2	10	TraesCS1A03G0896800	c.1327-4_1327-3insGTTGTCGCCGAAGACCGCACCGAC
1A	500039508	551361789	67	0	0.962	0.962	0.662	96	52	549093683	T	TCTCC	INDEL	splice_region_variant&intron_variant	LOW	TraesCS1A03G0897000.1	2	TraesCS1A03G0897000	c.505-4_505-3insGGAG
1A	500039508	551361789	67	0.919	0	-0.919	0.414	37	21	549722937	T	TAATGAAGACGGATTGCTATG	INDEL	splice_donor_variant&intron_variant	HIGH	TraesCS1A03G0900000.1	8	TraesCS1A03G0900000	c.1674_1674+1insAATGAAGACGGATTGCTATG
1A	500039508	551361789	67	0.919	0	-0.919	0.414	37	21	549722937	T	TAATGAAGACGGATTGCTATG	INDEL	splice_donor_variant&intron_variant	HIGH	TraesCS1A03G0900000.2	9	TraesCS1A03G0900000	c.1557_1557+1insAATGAAGACGGATTGCTATG
1A	500039508	551361789	67	0.919	0	-0.919	0.414	37	21	549722937	T	TAATGAAGACGGATTGCTATG	INDEL	splice_donor_variant&intron_variant	HIGH	TraesCS1A03G0900000.3	8	TraesCS1A03G0900000	c.1653_1653+1insAATGAAGACGGATTGCTATG
1A	500039508	551361789	67	0.729	0.263	-0.466	0.524	48	57	550220879	G	A	SNP	3_prime_UTR_variant	MODIFIER	TraesCS1A03G0902000.1	4	TraesCS1A03G0902000	c.*262C>T
1A	500039508	551361789	67	0.729	0.263	-0.466	0.524	48	57	550220879	G	A	SNP	upstream_gene_variant	MODIFIER	TraesCS1A03G0901900LC.1	-1	TraesCS1A03G0901900LC	c.-2097C>T
1A	500039508	551361789	67	0.729	0.263	-0.466	0.524	48	57	550220879	G	A	SNP	downstream_gene_variant	MODIFIER	TraesCS1A03G0901800LC.1	-1	TraesCS1A03G0901800LC	c.*3714G>A
1A	500039508	551361789	67	0.963	0	-0.963	0.447	27	20	551292252	C	CGTATTCGCAGAGGGA	INDEL	splice_acceptor_variant&intron_variant	HIGH	TraesCS1A03G0906100.1	1	TraesCS1A03G0906100	c.247-1_247insTCCCTCTGCGAATAC
1A	500039508	551361789	67	0.963	0	-0.963	0.447	27	20	551292252	C	CGTATTCGCAGAGGGA	INDEL	upstream_gene_variant	MODIFIER	TraesCS1A03G0906200.1	-1	TraesCS1A03G0906200	c.-2993_-2992insGTATTCGCAGAGGGA
1A	500039508	551361789	67	0.868	0	-0.868	0.372	68	26	551361789	C	T	SNP	downstream_gene_variant	MODIFIER	TraesCS1A03G0906700LC.1	-1	TraesCS1A03G0906700LC	c.*1487C>T
1A	500039508	551361789	67	0.868	0	-0.868	0.372	68	26	551361789	C	T	SNP	intergenic_region	MODIFIER	TraesCS1A03G0906700LC-TraesCS1A03G0906800	-1	TraesCS1A03G0906700LC-TraesCS1A03G0906800	n.551361789C>T
1A	512571327	553372000	30	0.804	0	-0.804	0.577	143	129	512571328	GGACCTTTAATACGATGGTGAGCAAAGATGCATGTGTGAATTCATTTCATGAAATCTTTCTCTACACACACTAGATAGTTCTCGAGCCTGACGAGCAGAGCATCACAGTGGGAGCTTGCACACTGTTGTCAACTGATAAACAGGGTTGCTGAGACT	G	INDEL	splice_acceptor_variant&conservative_inframe_deletion&splice_region_variant&intron_variant	HIGH	TraesCS1A03G0793500.1	3	TraesCS1A03G0793500	c.117+4_120del	p.Val40_Pro41del
1A	512571327	553372000	30	0.958	0	-0.958	0.674	48	93	533395453	G	GCAACTGATGACTCTCTGAAGAGTGTTAACC	INDEL	splice_donor_variant&intron_variant	HIGH	TraesCS1A03G0846100.1	14	TraesCS1A03G0846100	c.2244+1_2244+2insCAACTGATGACTCTCTGAAGAGTGTTAACC
1A	512571327	553372000	30	0.958	0	-0.958	0.674	48	93	533395453	G	GCAACTGATGACTCTCTGAAGAGTGTTAACC	INDEL	splice_donor_variant&intron_variant	HIGH	TraesCS1A03G0846100.2	14	TraesCS1A03G0846100	c.2160+1_2160+2insCAACTGATGACTCTCTGAAGAGTGTTAACC
1A	512571327	553372000	30	0	0.924	0.924	0.609	90	66	536738420	C	CACAAGCTACCGGGTTGAGGCACATCATGGACATCAACAACCATTTTTTCTGTTTTGACCAGATAA	INDEL	splice_acceptor_variant&intron_variant	HIGH	TraesCS1A03G0858300.1	3	TraesCS1A03G0858300	c.982-1_982insTTATCTGGTCAAAACAGAAAAAATGGTTGTTGATGTCCATGATGTGCCTCAACCCGGTAGCTTGT
1A	512571327	553372000	30	0	0.924	0.924	0.609	90	66	536738420	C	CACAAGCTACCGGGTTGAGGCACATCATGGACATCAACAACCATTTTTTCTGTTTTGACCAGATAA	INDEL	upstream_gene_variant	MODIFIER	TraesCS1A03G0858200LC.1	-1	TraesCS1A03G0858200LC	c.-3088_-3087insTTATCTGGTCAAAACAGAAAAAATGGTTGTTGATGTCCATGATGTGCCTCAACCCGGTAGCTTGT
1A	512571327	553372000	30	0	0.944	0.944	0.49	46	54	537018111	CGCAGGTGCGCCGGAGTTCTCCCCCGTTTCTCTTGTCCCCTGTTTCTCGCCGGACGCCGGCAAAGTTGCCAAATTATTGACTGTTACTGCAGTTCAGCTTGCACCCTTTGCTTGTACGGCTACGCTTGCTTAACGGACTCTTTTGCTTCCGCCCGTGCTT	C	INDEL	splice_donor_variant&splice_region_variant&5_prime_UTR_variant&intron_variant	HIGH	TraesCS1A03G0859800.1	1	TraesCS1A03G0859800	c.-168_-164-5del
1A	512571327	553372000	30	0	0.944	0.944	0.49	46	54	537018111	CGCAGGTGCGCCGGAGTTCTCCCCCGTTTCTCTTGTCCCCTGTTTCTCGCCGGACGCCGGCAAAGTTGCCAAATTATTGACTGTTACTGCAGTTCAGCTTGCACCCTTTGCTTGTACGGCTACGCTTGCTTAACGGACTCTTTTGCTTCCGCCCGTGCTT	C	INDEL	splice_donor_variant&splice_region_variant&5_prime_UTR_variant&intron_variant	HIGH	TraesCS1A03G0859800.2	1	TraesCS1A03G0859800	c.-168_-164-5del
1A	512571327	553372000	30	0	0.944	0.944	0.49	46	54	537018111	CGCAGGTGCGCCGGAGTTCTCCCCCGTTTCTCTTGTCCCCTGTTTCTCGCCGGACGCCGGCAAAGTTGCCAAATTATTGACTGTTACTGCAGTTCAGCTTGCACCCTTTGCTTGTACGGCTACGCTTGCTTAACGGACTCTTTTGCTTCCGCCCGTGCTT	C	INDEL	splice_region_variant	LOW	TraesCS1A03G0859800.1	1	TraesCS1A03G0859800	c.-168_-164-5del
1A	512571327	553372000	30	0	0.944	0.944	0.49	46	54	537018111	CGCAGGTGCGCCGGAGTTCTCCCCCGTTTCTCTTGTCCCCTGTTTCTCGCCGGACGCCGGCAAAGTTGCCAAATTATTGACTGTTACTGCAGTTCAGCTTGCACCCTTTGCTTGTACGGCTACGCTTGCTTAACGGACTCTTTTGCTTCCGCCCGTGCTT	C	INDEL	splice_region_variant	LOW	TraesCS1A03G0859800.2	1	TraesCS1A03G0859800	c.-168_-164-5del
1A	512571327	553372000	30	0	0.944	0.944	0.49	46	54	537018111	CGCAGGTGCGCCGGAGTTCTCCCCCGTTTCTCTTGTCCCCTGTTTCTCGCCGGACGCCGGCAAAGTTGCCAAATTATTGACTGTTACTGCAGTTCAGCTTGCACCCTTTGCTTGTACGGCTACGCTTGCTTAACGGACTCTTTTGCTTCCGCCCGTGCTT	C	INDEL	downstream_gene_variant	MODIFIER	TraesCS1A03G0859900.1	-1	TraesCS1A03G0859900	c.*2768_*2926del
1A	512571327	553372000	30	0	0.944	0.944	0.49	46	54	537018111	CGCAGGTGCGCCGGAGTTCTCCCCCGTTTCTCTTGTCCCCTGTTTCTCGCCGGACGCCGGCAAAGTTGCCAAATTATTGACTGTTACTGCAGTTCAGCTTGCACCCTTTGCTTGTACGGCTACGCTTGCTTAACGGACTCTTTTGCTTCCGCCCGTGCTT	C	INDEL	non_coding_transcript_variant	MODIFIER	TraesCS1A03G0859800.1	1	TraesCS1A03G0859800	c.-168_-164-5del
1A	512571327	553372000	30	0	0.944	0.944	0.49	46	54	537018111	CGCAGGTGCGCCGGAGTTCTCCCCCGTTTCTCTTGTCCCCTGTTTCTCGCCGGACGCCGGCAAAGTTGCCAAATTATTGACTGTTACTGCAGTTCAGCTTGCACCCTTTGCTTGTACGGCTACGCTTGCTTAACGGACTCTTTTGCTTCCGCCCGTGCTT	C	INDEL	non_coding_transcript_variant	MODIFIER	TraesCS1A03G0859800.2	1	TraesCS1A03G0859800	c.-168_-164-5del
1A	512571327	553372000	30	0	1	1	0.685	50	23	541907632	G	GCCGGCCCATCAGACCCCAAGCAATTCCCCTTCATTTTGGTCGGGAACAAGGTCGATCTGGACGC	INDEL	splice_donor_variant&intron_variant	HIGH	TraesCS1A03G0874700.1	4	TraesCS1A03G0874700	c.333+1_333+2insCCGGCCCATCAGACCCCAAGCAATTCCCCTTCATTTTGGTCGGGAACAAGGTCGATCTGGACGC
1A	512571327	553372000	30	0	1	1	0.685	50	23	541907632	G	GCCGGCCCATCAGACCCCAAGCAATTCCCCTTCATTTTGGTCGGGAACAAGGTCGATCTGGACGC	INDEL	upstream_gene_variant	MODIFIER	TraesCS1A03G0874600.1	-1	TraesCS1A03G0874600	c.-2960_-2959insGCGTCCAGATCGACCTTGTTCCCGACCAAAATGAAGGGGAATTGCTTGGGGTCTGATGGGCCGG
1A	512571327	553372000	30	0	1	1	0.685	50	23	541907632	G	GCCGGCCCATCAGACCCCAAGCAATTCCCCTTCATTTTGGTCGGGAACAAGGTCGATCTGGACGC	INDEL	upstream_gene_variant	MODIFIER	TraesCS1A03G0874600.2	-1	TraesCS1A03G0874600	c.-2960_-2959insGCGTCCAGATCGACCTTGTTCCCGACCAAAATGAAGGGGAATTGCTTGGGGTCTGATGGGCCGG
1A	512571327	553372000	30	0	1	1	0.635	87	50	542378738	GCATA	G	INDEL	upstream_gene_variant	MODIFIER	TraesCS1A03G0876600.1	-1	TraesCS1A03G0876600	c.-1477_-1474delCATA
1A	512571327	553372000	30	0	1	1	0.635	87	50	542378738	GCATA	G	INDEL	intergenic_region	MODIFIER	TraesCS1A03G0876500-TraesCS1A03G0876600	-1	TraesCS1A03G0876500-TraesCS1A03G0876600	n.542378739_542378742delCATA
1A	512571327	553372000	30	0	1	1	0.599	103	69	542378786	AGGGAACTTGC	A	INDEL	upstream_gene_variant	MODIFIER	TraesCS1A03G0876600.1	-1	TraesCS1A03G0876600	c.-1429_-1420delGGGAACTTGC
1A	512571327	553372000	30	0	1	1	0.599	103	69	542378786	AGGGAACTTGC	A	INDEL	intergenic_region	MODIFIER	TraesCS1A03G0876500-TraesCS1A03G0876600	-1	TraesCS1A03G0876500-TraesCS1A03G0876600	n.542378787_542378796delGGGAACTTGC
1A	512571327	553372000	30	0.7	0.239	-0.461	0.621	20	46	545667292	A	C	SNP	3_prime_UTR_variant	MODIFIER	TraesCS1A03G0885500.1	5	TraesCS1A03G0885500	c.*44T>G
1A	512571327	553372000	30	0.7	0.239	-0.461	0.621	20	46	545667292	A	C	SNP	downstream_gene_variant	MODIFIER	TraesCS1A03G0885400.1	-1	TraesCS1A03G0885400	c.*1057A>C
1A	512571327	553372000	30	0.8	0.273	-0.527	0.447	25	22	545791214	T	C	SNP	upstream_gene_variant	MODIFIER	TraesCS1A03G0886300.1	-1	TraesCS1A03G0886300	c.-896A>G
1A	512571327	553372000	30	0.8	0.273	-0.527	0.447	25	22	545791214	T	C	SNP	downstream_gene_variant	MODIFIER	TraesCS1A03G0886400.2	-1	TraesCS1A03G0886400	c.*1044A>G
1A	512571327	553372000	30	0.8	0.273	-0.527	0.447	25	22	545791214	T	C	SNP	downstream_gene_variant	MODIFIER	TraesCS1A03G0886400.1	-1	TraesCS1A03G0886400	c.*1044A>G
1A	512571327	553372000	30	0.8	0.273	-0.527	0.447	25	22	545791214	T	C	SNP	downstream_gene_variant	MODIFIER	TraesCS1A03G0886400.3	-1	TraesCS1A03G0886400	c.*1044A>G
1A	512571327	553372000	30	0.8	0.273	-0.527	0.447	25	22	545791214	T	C	SNP	downstream_gene_variant	MODIFIER	TraesCS1A03G0886400.4	-1	TraesCS1A03G0886400	c.*1044A>G
1A	512571327	553372000	30	0.8	0.273	-0.527	0.447	25	22	545791214	T	C	SNP	intergenic_region	MODIFIER	TraesCS1A03G0886300-TraesCS1A03G0886400	-1	TraesCS1A03G0886300-TraesCS1A03G0886400	n.545791214T>C
1A	512571327	553372000	30	0.846	0	-0.846	0.398	91	37	549060081	G	GGTCGGTGCGGTCTTCGGCGACAAC	INDEL	splice_region_variant&intron_variant	LOW	TraesCS1A03G0896800.1	9	TraesCS1A03G0896800	c.1336-4_1336-3insGTTGTCGCCGAAGACCGCACCGAC
1A	512571327	553372000	30	0.846	0	-0.846	0.398	91	37	549060081	G	GGTCGGTGCGGTCTTCGGCGACAAC	INDEL	splice_region_variant&intron_variant	LOW	TraesCS1A03G0896800.2	10	TraesCS1A03G0896800	c.1327-4_1327-3insGTTGTCGCCGAAGACCGCACCGAC
1A	512571327	553372000	30	0	0.962	0.962	0.662	96	52	549093683	T	TCTCC	INDEL	splice_region_variant&intron_variant	LOW	TraesCS1A03G0897000.1	2	TraesCS1A03G0897000	c.505-4_505-3insGGAG
1A	512571327	553372000	30	0.919	0	-0.919	0.414	37	21	549722937	T	TAATGAAGACGGATTGCTATG	INDEL	splice_donor_variant&intron_variant	HIGH	TraesCS1A03G0900000.1	8	TraesCS1A03G0900000	c.1674_1674+1insAATGAAGACGGATTGCTATG
1A	512571327	553372000	30	0.919	0	-0.919	0.414	37	21	549722937	T	TAATGAAGACGGATTGCTATG	INDEL	splice_donor_variant&intron_variant	HIGH	TraesCS1A03G0900000.2	9	TraesCS1A03G0900000	c.1557_1557+1insAATGAAGACGGATTGCTATG
1A	512571327	553372000	30	0.919	0	-0.919	0.414	37	21	549722937	T	TAATGAAGACGGATTGCTATG	INDEL	splice_donor_variant&intron_variant	HIGH	TraesCS1A03G0900000.3	8	TraesCS1A03G0900000	c.1653_1653+1insAATGAAGACGGATTGCTATG
1A	512571327	553372000	30	0.729	0.263	-0.466	0.524	48	57	550220879	G	A	SNP	3_prime_UTR_variant	MODIFIER	TraesCS1A03G0902000.1	4	TraesCS1A03G0902000	c.*262C>T
1A	512571327	553372000	30	0.729	0.263	-0.466	0.524	48	57	550220879	G	A	SNP	upstream_gene_variant	MODIFIER	TraesCS1A03G0901900LC.1	-1	TraesCS1A03G0901900LC	c.-2097C>T
1A	512571327	553372000	30	0.729	0.263	-0.466	0.524	48	57	550220879	G	A	SNP	downstream_gene_variant	MODIFIER	TraesCS1A03G0901800LC.1	-1	TraesCS1A03G0901800LC	c.*3714G>A
1A	512571327	553372000	30	0.963	0	-0.963	0.447	27	20	551292252	C	CGTATTCGCAGAGGGA	INDEL	splice_acceptor_variant&intron_variant	HIGH	TraesCS1A03G0906100.1	1	TraesCS1A03G0906100	c.247-1_247insTCCCTCTGCGAATAC
1A	512571327	553372000	30	0.963	0	-0.963	0.447	27	20	551292252	C	CGTATTCGCAGAGGGA	INDEL	upstream_gene_variant	MODIFIER	TraesCS1A03G0906200.1	-1	TraesCS1A03G0906200	c.-2993_-2992insGTATTCGCAGAGGGA
1A	512571327	553372000	30	0.868	0	-0.868	0.372	68	26	551361789	C	T	SNP	downstream_gene_variant	MODIFIER	TraesCS1A03G0906700LC.1	-1	TraesCS1A03G0906700LC	c.*1487C>T
1A	512571327	553372000	30	0.868	0	-0.868	0.372	68	26	551361789	C	T	SNP	intergenic_region	MODIFIER	TraesCS1A03G0906700LC-TraesCS1A03G0906800	-1	TraesCS1A03G0906700LC-TraesCS1A03G0906800	n.551361789C>T
1A	512571327	553372000	30	0.919	0	-0.919	0.477	37	28	551361857	G	A	SNP	downstream_gene_variant	MODIFIER	TraesCS1A03G0906700LC.1	-1	TraesCS1A03G0906700LC	c.*1555G>A
1A	512571327	553372000	30	0.919	0	-0.919	0.477	37	28	551361857	G	A	SNP	intergenic_region	MODIFIER	TraesCS1A03G0906700LC-TraesCS1A03G0906800	-1	TraesCS1A03G0906700LC-TraesCS1A03G0906800	n.551361857G>A
1A	512571327	553372000	30	0	1	1	0.611	33	21	552317029	G	GGAACAAGTTTGGCTCA	INDEL	splice_donor_variant&intron_variant	HIGH	TraesCS1A03G0910900.1	3	TraesCS1A03G0910900	c.608_608+1insGAACAAGTTTGGCTCA
1A	512571327	553372000	30	0	1	1	0.611	33	21	552317029	G	GGAACAAGTTTGGCTCA	INDEL	upstream_gene_variant	MODIFIER	TraesCS1A03G0911000.1	-1	TraesCS1A03G0911000	c.-2659_-2658insGAACAAGTTTGGCTCA
1A	512571327	553372000	30	0	1	1	0.825	326	69	552505707	C	CAATGGAAAGCTTGTGTTCGAGTCTTCTGAAAAGCTTTTCCTTTTCTGAT	INDEL	splice_acceptor_variant&intron_variant	HIGH	TraesCS1A03G0911900.1	4	TraesCS1A03G0911900	c.1519-1_1519insATCAGAAAAGGAAAAGCTTTTCAGAAGACTCGAACACAAGCTTTCCATT
1A	512571327	553372000	30	0.972	0	-0.972	0.603	251	363	553208106	T	TGGAAACTTTGAACACCCTCCTTAAGATCC	INDEL	splice_region_variant&intron_variant	LOW	TraesCS1A03G0915700.1	8	TraesCS1A03G0915700	c.1552-3_1552-2insGGATCTTAAGGAGGGTGTTCAAAGTTTCC
1A	512571327	553372000	30	0.972	0	-0.972	0.603	251	363	553208106	T	TGGAAACTTTGAACACCCTCCTTAAGATCC	INDEL	upstream_gene_variant	MODIFIER	TraesCS1A03G0915600.1	-1	TraesCS1A03G0915600	c.-2908_-2907insGGATCTTAAGGAGGGTGTTCAAAGTTTCC
1A	512571327	553372000	30	0.982	0	-0.982	0.438	55	41	553372000	G	GAAGAGCGCCTTCTCAGCACCTAGTATCTGGAGAGTGGAGGCAGGGCATTTTGCAAGATTTGAAAGA	INDEL	splice_region_variant&intron_variant	LOW	TraesCS1A03G0916800.1	5	TraesCS1A03G0916800	c.1020-4_1020-3insTCTTTCAAATCTTGCAAAATGCCCTGCCTCCACTCTCCAGATACTAGGTGCTGAGAAGGCGCTCTT
1A	512571327	553372000	30	0.982	0	-0.982	0.438	55	41	553372000	G	GAAGAGCGCCTTCTCAGCACCTAGTATCTGGAGAGTGGAGGCAGGGCATTTTGCAAGATTTGAAAGA	INDEL	splice_region_variant&intron_variant	LOW	TraesCS1A03G0916800.2	5	TraesCS1A03G0916800	c.1020-4_1020-3insTCTTTCAAATCTTGCAAAATGCCCTGCCTCCACTCTCCAGATACTAGGTGCTGAGAAGGCGCTCTT
1A	512571327	553372000	30	0.982	0	-0.982	0.438	55	41	553372000	G	GAAGAGCGCCTTCTCAGCACCTAGTATCTGGAGAGTGGAGGCAGGGCATTTTGCAAGATTTGAAAGA	INDEL	upstream_gene_variant	MODIFIER	TraesCS1A03G0916700.1	-1	TraesCS1A03G0916700	c.-2822_-2821insTCTTTCAAATCTTGCAAAATGCCCTGCCTCCACTCTCCAGATACTAGGTGCTGAGAAGGCGCTCTT
1A	542378737	593057276	61	0	1	1	0.635	87	50	542378738	GCATA	G	INDEL	upstream_gene_variant	MODIFIER	TraesCS1A03G0876600.1	-1	TraesCS1A03G0876600	c.-1477_-1474delCATA
1A	542378737	593057276	61	0	1	1	0.635	87	50	542378738	GCATA	G	INDEL	intergenic_region	MODIFIER	TraesCS1A03G0876500-TraesCS1A03G0876600	-1	TraesCS1A03G0876500-TraesCS1A03G0876600	n.542378739_542378742delCATA
1A	542378737	593057276	61	0	1	1	0.599	103	69	542378786	AGGGAACTTGC	A	INDEL	upstream_gene_variant	MODIFIER	TraesCS1A03G0876600.1	-1	TraesCS1A03G0876600	c.-1429_-1420delGGGAACTTGC
1A	542378737	593057276	61	0	1	1	0.599	103	69	542378786	AGGGAACTTGC	A	INDEL	intergenic_region	MODIFIER	TraesCS1A03G0876500-TraesCS1A03G0876600	-1	TraesCS1A03G0876500-TraesCS1A03G0876600	n.542378787_542378796delGGGAACTTGC
1A	542378737	593057276	61	0.7	0.239	-0.461	0.621	20	46	545667292	A	C	SNP	3_prime_UTR_variant	MODIFIER	TraesCS1A03G0885500.1	5	TraesCS1A03G0885500	c.*44T>G
1A	542378737	593057276	61	0.7	0.239	-0.461	0.621	20	46	545667292	A	C	SNP	downstream_gene_variant	MODIFIER	TraesCS1A03G0885400.1	-1	TraesCS1A03G0885400	c.*1057A>C
1A	542378737	593057276	61	0.8	0.273	-0.527	0.447	25	22	545791214	T	C	SNP	upstream_gene_variant	MODIFIER	TraesCS1A03G0886300.1	-1	TraesCS1A03G0886300	c.-896A>G
1A	542378737	593057276	61	0.8	0.273	-0.527	0.447	25	22	545791214	T	C	SNP	downstream_gene_variant	MODIFIER	TraesCS1A03G0886400.2	-1	TraesCS1A03G0886400	c.*1044A>G
1A	542378737	593057276	61	0.8	0.273	-0.527	0.447	25	22	545791214	T	C	SNP	downstream_gene_variant	MODIFIER	TraesCS1A03G0886400.1	-1	TraesCS1A03G0886400	c.*1044A>G
1A	542378737	593057276	61	0.8	0.273	-0.527	0.447	25	22	545791214	T	C	SNP	downstream_gene_variant	MODIFIER	TraesCS1A03G0886400.3	-1	TraesCS1A03G0886400	c.*1044A>G
1A	542378737	593057276	61	0.8	0.273	-0.527	0.447	25	22	545791214	T	C	SNP	downstream_gene_variant	MODIFIER	TraesCS1A03G0886400.4	-1	TraesCS1A03G0886400	c.*1044A>G
1A	542378737	593057276	61	0.8	0.273	-0.527	0.447	25	22	545791214	T	C	SNP	intergenic_region	MODIFIER	TraesCS1A03G0886300-TraesCS1A03G0886400	-1	TraesCS1A03G0886300-TraesCS1A03G0886400	n.545791214T>C
1A	542378737	593057276	61	0.846	0	-0.846	0.398	91	37	549060081	G	GGTCGGTGCGGTCTTCGGCGACAAC	INDEL	splice_region_variant&intron_variant	LOW	TraesCS1A03G0896800.1	9	TraesCS1A03G0896800	c.1336-4_1336-3insGTTGTCGCCGAAGACCGCACCGAC
1A	542378737	593057276	61	0.846	0	-0.846	0.398	91	37	549060081	G	GGTCGGTGCGGTCTTCGGCGACAAC	INDEL	splice_region_variant&intron_variant	LOW	TraesCS1A03G0896800.2	10	TraesCS1A03G0896800	c.1327-4_1327-3insGTTGTCGCCGAAGACCGCACCGAC
1A	542378737	593057276	61	0	0.962	0.962	0.662	96	52	549093683	T	TCTCC	INDEL	splice_region_variant&intron_variant	LOW	TraesCS1A03G0897000.1	2	TraesCS1A03G0897000	c.505-4_505-3insGGAG
1A	542378737	593057276	61	0.919	0	-0.919	0.414	37	21	549722937	T	TAATGAAGACGGATTGCTATG	INDEL	splice_donor_variant&intron_variant	HIGH	TraesCS1A03G0900000.1	8	TraesCS1A03G0900000	c.1674_1674+1insAATGAAGACGGATTGCTATG
1A	542378737	593057276	61	0.919	0	-0.919	0.414	37	21	549722937	T	TAATGAAGACGGATTGCTATG	INDEL	splice_donor_variant&intron_variant	HIGH	TraesCS1A03G0900000.2	9	TraesCS1A03G0900000	c.1557_1557+1insAATGAAGACGGATTGCTATG
1A	542378737	593057276	61	0.919	0	-0.919	0.414	37	21	549722937	T	TAATGAAGACGGATTGCTATG	INDEL	splice_donor_variant&intron_variant	HIGH	TraesCS1A03G0900000.3	8	TraesCS1A03G0900000	c.1653_1653+1insAATGAAGACGGATTGCTATG
1A	542378737	593057276	61	0.729	0.263	-0.466	0.524	48	57	550220879	G	A	SNP	3_prime_UTR_variant	MODIFIER	TraesCS1A03G0902000.1	4	TraesCS1A03G0902000	c.*262C>T
1A	542378737	593057276	61	0.729	0.263	-0.466	0.524	48	57	550220879	G	A	SNP	upstream_gene_variant	MODIFIER	TraesCS1A03G0901900LC.1	-1	TraesCS1A03G0901900LC	c.-2097C>T
1A	542378737	593057276	61	0.729	0.263	-0.466	0.524	48	57	550220879	G	A	SNP	downstream_gene_variant	MODIFIER	TraesCS1A03G0901800LC.1	-1	TraesCS1A03G0901800LC	c.*3714G>A
1A	542378737	593057276	61	0.963	0	-0.963	0.447	27	20	551292252	C	CGTATTCGCAGAGGGA	INDEL	splice_acceptor_variant&intron_variant	HIGH	TraesCS1A03G0906100.1	1	TraesCS1A03G0906100	c.247-1_247insTCCCTCTGCGAATAC
1A	542378737	593057276	61	0.963	0	-0.963	0.447	27	20	551292252	C	CGTATTCGCAGAGGGA	INDEL	upstream_gene_variant	MODIFIER	TraesCS1A03G0906200.1	-1	TraesCS1A03G0906200	c.-2993_-2992insGTATTCGCAGAGGGA
1A	542378737	593057276	61	0.868	0	-0.868	0.372	68	26	551361789	C	T	SNP	downstream_gene_variant	MODIFIER	TraesCS1A03G0906700LC.1	-1	TraesCS1A03G0906700LC	c.*1487C>T
1A	542378737	593057276	61	0.868	0	-0.868	0.372	68	26	551361789	C	T	SNP	intergenic_region	MODIFIER	TraesCS1A03G0906700LC-TraesCS1A03G0906800	-1	TraesCS1A03G0906700LC-TraesCS1A03G0906800	n.551361789C>T
1A	542378737	593057276	61	0.919	0	-0.919	0.477	37	28	551361857	G	A	SNP	downstream_gene_variant	MODIFIER	TraesCS1A03G0906700LC.1	-1	TraesCS1A03G0906700LC	c.*1555G>A
1A	542378737	593057276	61	0.919	0	-0.919	0.477	37	28	551361857	G	A	SNP	intergenic_region	MODIFIER	TraesCS1A03G0906700LC-TraesCS1A03G0906800	-1	TraesCS1A03G0906700LC-TraesCS1A03G0906800	n.551361857G>A
1A	542378737	593057276	61	0	1	1	0.611	33	21	552317029	G	GGAACAAGTTTGGCTCA	INDEL	splice_donor_variant&intron_variant	HIGH	TraesCS1A03G0910900.1	3	TraesCS1A03G0910900	c.608_608+1insGAACAAGTTTGGCTCA
1A	542378737	593057276	61	0	1	1	0.611	33	21	552317029	G	GGAACAAGTTTGGCTCA	INDEL	upstream_gene_variant	MODIFIER	TraesCS1A03G0911000.1	-1	TraesCS1A03G0911000	c.-2659_-2658insGAACAAGTTTGGCTCA
1A	542378737	593057276	61	0	1	1	0.825	326	69	552505707	C	CAATGGAAAGCTTGTGTTCGAGTCTTCTGAAAAGCTTTTCCTTTTCTGAT	INDEL	splice_acceptor_variant&intron_variant	HIGH	TraesCS1A03G0911900.1	4	TraesCS1A03G0911900	c.1519-1_1519insATCAGAAAAGGAAAAGCTTTTCAGAAGACTCGAACACAAGCTTTCCATT
1A	542378737	593057276	61	0.972	0	-0.972	0.603	251	363	553208106	T	TGGAAACTTTGAACACCCTCCTTAAGATCC	INDEL	splice_region_variant&intron_variant	LOW	TraesCS1A03G0915700.1	8	TraesCS1A03G0915700	c.1552-3_1552-2insGGATCTTAAGGAGGGTGTTCAAAGTTTCC
1A	542378737	593057276	61	0.972	0	-0.972	0.603	251	363	553208106	T	TGGAAACTTTGAACACCCTCCTTAAGATCC	INDEL	upstream_gene_variant	MODIFIER	TraesCS1A03G0915600.1	-1	TraesCS1A03G0915600	c.-2908_-2907insGGATCTTAAGGAGGGTGTTCAAAGTTTCC
1A	542378737	593057276	61	0.982	0	-0.982	0.438	55	41	553372000	G	GAAGAGCGCCTTCTCAGCACCTAGTATCTGGAGAGTGGAGGCAGGGCATTTTGCAAGATTTGAAAGA	INDEL	splice_region_variant&intron_variant	LOW	TraesCS1A03G0916800.1	5	TraesCS1A03G0916800	c.1020-4_1020-3insTCTTTCAAATCTTGCAAAATGCCCTGCCTCCACTCTCCAGATACTAGGTGCTGAGAAGGCGCTCTT
1A	542378737	593057276	61	0.982	0	-0.982	0.438	55	41	553372000	G	GAAGAGCGCCTTCTCAGCACCTAGTATCTGGAGAGTGGAGGCAGGGCATTTTGCAAGATTTGAAAGA	INDEL	splice_region_variant&intron_variant	LOW	TraesCS1A03G0916800.2	5	TraesCS1A03G0916800	c.1020-4_1020-3insTCTTTCAAATCTTGCAAAATGCCCTGCCTCCACTCTCCAGATACTAGGTGCTGAGAAGGCGCTCTT
1A	542378737	593057276	61	0.982	0	-0.982	0.438	55	41	553372000	G	GAAGAGCGCCTTCTCAGCACCTAGTATCTGGAGAGTGGAGGCAGGGCATTTTGCAAGATTTGAAAGA	INDEL	upstream_gene_variant	MODIFIER	TraesCS1A03G0916700.1	-1	TraesCS1A03G0916700	c.-2822_-2821insTCTTTCAAATCTTGCAAAATGCCCTGCCTCCACTCTCCAGATACTAGGTGCTGAGAAGGCGCTCTT
1A	542378737	593057276	61	0.812	0	-0.812	0.574	32	29	556533142	C	CATGAGTTT	INDEL	splice_acceptor_variant&intron_variant	HIGH	TraesCS1A03G0936500.2	13	TraesCS1A03G0936500	c.1333-1_1333insAAACTCAT
1A	542378737	593057276	61	0.812	0	-0.812	0.574	32	29	556533142	C	CATGAGTTT	INDEL	splice_acceptor_variant&intron_variant	HIGH	TraesCS1A03G0936500.3	13	TraesCS1A03G0936500	c.1294-1_1294insAAACTCAT
1A	542378737	593057276	61	0.812	0	-0.812	0.574	32	29	556533142	C	CATGAGTTT	INDEL	upstream_gene_variant	MODIFIER	TraesCS1A03G0936400.1	-1	TraesCS1A03G0936400	c.-2581_-2580insAAACTCAT
1A	542378737	593057276	61	0.812	0	-0.812	0.574	32	29	556533142	C	CATGAGTTT	INDEL	upstream_gene_variant	MODIFIER	TraesCS1A03G0936600LC.1	-1	TraesCS1A03G0936600LC	c.-2549_-2548insATGAGTTT
1A	542378737	593057276	61	0.812	0	-0.812	0.574	32	29	556533142	C	CATGAGTTT	INDEL	intron_variant	MODIFIER	TraesCS1A03G0936500.1	11	TraesCS1A03G0936500	c.1069-13_1069-12insAAACTCAT
1A	542378737	593057276	61	0.812	0	-0.812	0.574	32	29	556533142	C	CATGAGTTT	INDEL	intron_variant	MODIFIER	TraesCS1A03G0936500.4	13	TraesCS1A03G0936500	c.1332+483_1332+484insAAACTCAT
1A	542378737	593057276	61	0	0.958	0.958	0.646	41	24	576998969	G	GAATCAATTTAAGCAGAGAGTTTGGATCCGAGGAGCTCGCCCGGAGGAAGAAGA	INDEL	splice_donor_variant&intron_variant	HIGH	TraesCS1A03G1009400.1	5	TraesCS1A03G1009400	c.474_474+1insAATCAATTTAAGCAGAGAGTTTGGATCCGAGGAGCTCGCCCGGAGGAAGAAGA
1A	542378737	593057276	61	0	0.958	0.958	0.646	41	24	576998969	G	GAATCAATTTAAGCAGAGAGTTTGGATCCGAGGAGCTCGCCCGGAGGAAGAAGA	INDEL	upstream_gene_variant	MODIFIER	TraesCS1A03G1009700LC.1	-1	TraesCS1A03G1009700LC	c.-2577_-2576insAATCAATTTAAGCAGAGAGTTTGGATCCGAGGAGCTCGCCCGGAGGAAGAAGA
1A	542378737	593057276	61	0	0.958	0.958	0.646	41	24	576998969	G	GAATCAATTTAAGCAGAGAGTTTGGATCCGAGGAGCTCGCCCGGAGGAAGAAGA	INDEL	downstream_gene_variant	MODIFIER	TraesCS1A03G1009500LC.1	-1	TraesCS1A03G1009500LC	c.*1818_*1819insTCTTCTTCCTCCGGGCGAGCTCCTCGGATCCAAACTCTCTGCTTAAATTGATT
1A	542378737	593057276	61	0	0.958	0.958	0.646	41	24	576998969	G	GAATCAATTTAAGCAGAGAGTTTGGATCCGAGGAGCTCGCCCGGAGGAAGAAGA	INDEL	downstream_gene_variant	MODIFIER	TraesCS1A03G1009600LC.1	-1	TraesCS1A03G1009600LC	c.*2221_*2222insTCTTCTTCCTCCGGGCGAGCTCCTCGGATCCAAACTCTCTGCTTAAATTGATT
1A	542378737	593057276	61	0.906	0	-0.906	0.612	96	128	587064246	C	CGTT	INDEL	splice_acceptor_variant&intron_variant	HIGH	TraesCS1A03G1044100.1	8	TraesCS1A03G1044100	c.889-1_889insAAC
1A	542378737	593057276	61	0.757	0	-0.757	0.556	37	26	593056887	T	TCGCCGAAGAACTCGGTTGAGATCTGGCGGGGGCGCATGAGCCGGCGTCCCTCCTCCTCGACCGCGGCCTGC	INDEL	splice_region_variant&intron_variant	LOW	TraesCS1A03G1067100.1	2	TraesCS1A03G1067100	c.-54-3_-54-2insGCAGGCCGCGGTCGAGGAGGAGGGACGCCGGCTCATGCGCCCCCGCCAGATCTCAACCGAGTTCTTCGGCG
1A	542378737	593057276	61	0.757	0	-0.757	0.556	37	26	593056887	T	TCGCCGAAGAACTCGGTTGAGATCTGGCGGGGGCGCATGAGCCGGCGTCCCTCCTCCTCGACCGCGGCCTGC	INDEL	intron_variant	MODIFIER	TraesCS1A03G1067100.2	2	TraesCS1A03G1067100	c.129+251_129+252insGCAGGCCGCGGTCGAGGAGGAGGGACGCCGGCTCATGCGCCCCCGCCAGATCTCAACCGAGTTCTTCGGCG
1A	542378737	593057276	61	0.922	0	-0.922	0.438	64	41	593057276	GCCTGCGAACAATACATCGGCATCGGTTAGGGATTAAGGACGACAAGTCCGTCACGAATCACCACCGCCGGCCCCGGCCGCCTACGAGATCTATCGGATTGCAGTTGTATGGAGATTTGGGTAGGTTTTGGTGCGCGTA	G	INDEL	splice_acceptor_variant&splice_donor_variant&splice_region_variant&5_prime_UTR_variant&intron_variant	HIGH	TraesCS1A03G1067100.2	2	TraesCS1A03G1067100	c.-11+2_-10del
1A	542378737	593057276	61	0.922	0	-0.922	0.438	64	41	593057276	GCCTGCGAACAATACATCGGCATCGGTTAGGGATTAAGGACGACAAGTCCGTCACGAATCACCACCGCCGGCCCCGGCCGCCTACGAGATCTATCGGATTGCAGTTGTATGGAGATTTGGGTAGGTTTTGGTGCGCGTA	G	INDEL	splice_acceptor_variant&splice_donor_variant&splice_region_variant&5_prime_UTR_variant&intron_variant	HIGH	TraesCS1A03G1067100.1	2	TraesCS1A03G1067100	c.-194+2_-193del
1A	542378737	593057276	61	0.922	0	-0.922	0.438	64	41	593057276	GCCTGCGAACAATACATCGGCATCGGTTAGGGATTAAGGACGACAAGTCCGTCACGAATCACCACCGCCGGCCCCGGCCGCCTACGAGATCTATCGGATTGCAGTTGTATGGAGATTTGGGTAGGTTTTGGTGCGCGTA	G	INDEL	splice_region_variant	LOW	TraesCS1A03G1067100.2	2	TraesCS1A03G1067100	c.-11+2_-10del
1A	542378737	593057276	61	0.922	0	-0.922	0.438	64	41	593057276	GCCTGCGAACAATACATCGGCATCGGTTAGGGATTAAGGACGACAAGTCCGTCACGAATCACCACCGCCGGCCCCGGCCGCCTACGAGATCTATCGGATTGCAGTTGTATGGAGATTTGGGTAGGTTTTGGTGCGCGTA	G	INDEL	splice_region_variant	LOW	TraesCS1A03G1067100.1	2	TraesCS1A03G1067100	c.-194+2_-193del
1A	542378737	593057276	61	0.922	0	-0.922	0.438	64	41	593057276	GCCTGCGAACAATACATCGGCATCGGTTAGGGATTAAGGACGACAAGTCCGTCACGAATCACCACCGCCGGCCCCGGCCGCCTACGAGATCTATCGGATTGCAGTTGTATGGAGATTTGGGTAGGTTTTGGTGCGCGTA	G	INDEL	non_coding_transcript_variant	MODIFIER	TraesCS1A03G1067100.2	2	TraesCS1A03G1067100	c.-11+2_-10del
1A	542378737	593057276	61	0.922	0	-0.922	0.438	64	41	593057276	GCCTGCGAACAATACATCGGCATCGGTTAGGGATTAAGGACGACAAGTCCGTCACGAATCACCACCGCCGGCCCCGGCCGCCTACGAGATCTATCGGATTGCAGTTGTATGGAGATTTGGGTAGGTTTTGGTGCGCGTA	G	INDEL	non_coding_transcript_variant	MODIFIER	TraesCS1A03G1067100.1	2	TraesCS1A03G1067100	c.-194+2_-193del
1A	549093682	596868303	25	0	0.962	0.962	0.662	96	52	549093683	T	TCTCC	INDEL	splice_region_variant&intron_variant	LOW	TraesCS1A03G0897000.1	2	TraesCS1A03G0897000	c.505-4_505-3insGGAG
1A	549093682	596868303	25	0.919	0	-0.919	0.414	37	21	549722937	T	TAATGAAGACGGATTGCTATG	INDEL	splice_donor_variant&intron_variant	HIGH	TraesCS1A03G0900000.1	8	TraesCS1A03G0900000	c.1674_1674+1insAATGAAGACGGATTGCTATG
1A	549093682	596868303	25	0.919	0	-0.919	0.414	37	21	549722937	T	TAATGAAGACGGATTGCTATG	INDEL	splice_donor_variant&intron_variant	HIGH	TraesCS1A03G0900000.2	9	TraesCS1A03G0900000	c.1557_1557+1insAATGAAGACGGATTGCTATG
1A	549093682	596868303	25	0.919	0	-0.919	0.414	37	21	549722937	T	TAATGAAGACGGATTGCTATG	INDEL	splice_donor_variant&intron_variant	HIGH	TraesCS1A03G0900000.3	8	TraesCS1A03G0900000	c.1653_1653+1insAATGAAGACGGATTGCTATG
1A	549093682	596868303	25	0.729	0.263	-0.466	0.524	48	57	550220879	G	A	SNP	3_prime_UTR_variant	MODIFIER	TraesCS1A03G0902000.1	4	TraesCS1A03G0902000	c.*262C>T
1A	549093682	596868303	25	0.729	0.263	-0.466	0.524	48	57	550220879	G	A	SNP	upstream_gene_variant	MODIFIER	TraesCS1A03G0901900LC.1	-1	TraesCS1A03G0901900LC	c.-2097C>T
1A	549093682	596868303	25	0.729	0.263	-0.466	0.524	48	57	550220879	G	A	SNP	downstream_gene_variant	MODIFIER	TraesCS1A03G0901800LC.1	-1	TraesCS1A03G0901800LC	c.*3714G>A
1A	549093682	596868303	25	0.963	0	-0.963	0.447	27	20	551292252	C	CGTATTCGCAGAGGGA	INDEL	splice_acceptor_variant&intron_variant	HIGH	TraesCS1A03G0906100.1	1	TraesCS1A03G0906100	c.247-1_247insTCCCTCTGCGAATAC
1A	549093682	596868303	25	0.963	0	-0.963	0.447	27	20	551292252	C	CGTATTCGCAGAGGGA	INDEL	upstream_gene_variant	MODIFIER	TraesCS1A03G0906200.1	-1	TraesCS1A03G0906200	c.-2993_-2992insGTATTCGCAGAGGGA
1A	549093682	596868303	25	0.868	0	-0.868	0.372	68	26	551361789	C	T	SNP	downstream_gene_variant	MODIFIER	TraesCS1A03G0906700LC.1	-1	TraesCS1A03G0906700LC	c.*1487C>T
1A	549093682	596868303	25	0.868	0	-0.868	0.372	68	26	551361789	C	T	SNP	intergenic_region	MODIFIER	TraesCS1A03G0906700LC-TraesCS1A03G0906800	-1	TraesCS1A03G0906700LC-TraesCS1A03G0906800	n.551361789C>T
1A	549093682	596868303	25	0.919	0	-0.919	0.477	37	28	551361857	G	A	SNP	downstream_gene_variant	MODIFIER	TraesCS1A03G0906700LC.1	-1	TraesCS1A03G0906700LC	c.*1555G>A
1A	549093682	596868303	25	0.919	0	-0.919	0.477	37	28	551361857	G	A	SNP	intergenic_region	MODIFIER	TraesCS1A03G0906700LC-TraesCS1A03G0906800	-1	TraesCS1A03G0906700LC-TraesCS1A03G0906800	n.551361857G>A
1A	549093682	596868303	25	0	1	1	0.611	33	21	552317029	G	GGAACAAGTTTGGCTCA	INDEL	splice_donor_variant&intron_variant	HIGH	TraesCS1A03G0910900.1	3	TraesCS1A03G0910900	c.608_608+1insGAACAAGTTTGGCTCA
1A	549093682	596868303	25	0	1	1	0.611	33	21	552317029	G	GGAACAAGTTTGGCTCA	INDEL	upstream_gene_variant	MODIFIER	TraesCS1A03G0911000.1	-1	TraesCS1A03G0911000	c.-2659_-2658insGAACAAGTTTGGCTCA
1A	549093682	596868303	25	0	1	1	0.825	326	69	552505707	C	CAATGGAAAGCTTGTGTTCGAGTCTTCTGAAAAGCTTTTCCTTTTCTGAT	INDEL	splice_acceptor_variant&intron_variant	HIGH	TraesCS1A03G0911900.1	4	TraesCS1A03G0911900	c.1519-1_1519insATCAGAAAAGGAAAAGCTTTTCAGAAGACTCGAACACAAGCTTTCCATT
1A	549093682	596868303	25	0.972	0	-0.972	0.603	251	363	553208106	T	TGGAAACTTTGAACACCCTCCTTAAGATCC	INDEL	splice_region_variant&intron_variant	LOW	TraesCS1A03G0915700.1	8	TraesCS1A03G0915700	c.1552-3_1552-2insGGATCTTAAGGAGGGTGTTCAAAGTTTCC
1A	549093682	596868303	25	0.972	0	-0.972	0.603	251	363	553208106	T	TGGAAACTTTGAACACCCTCCTTAAGATCC	INDEL	upstream_gene_variant	MODIFIER	TraesCS1A03G0915600.1	-1	TraesCS1A03G0915600	c.-2908_-2907insGGATCTTAAGGAGGGTGTTCAAAGTTTCC
1A	549093682	596868303	25	0.982	0	-0.982	0.438	55	41	553372000	G	GAAGAGCGCCTTCTCAGCACCTAGTATCTGGAGAGTGGAGGCAGGGCATTTTGCAAGATTTGAAAGA	INDEL	splice_region_variant&intron_variant	LOW	TraesCS1A03G0916800.1	5	TraesCS1A03G0916800	c.1020-4_1020-3insTCTTTCAAATCTTGCAAAATGCCCTGCCTCCACTCTCCAGATACTAGGTGCTGAGAAGGCGCTCTT
1A	549093682	596868303	25	0.982	0	-0.982	0.438	55	41	553372000	G	GAAGAGCGCCTTCTCAGCACCTAGTATCTGGAGAGTGGAGGCAGGGCATTTTGCAAGATTTGAAAGA	INDEL	splice_region_variant&intron_variant	LOW	TraesCS1A03G0916800.2	5	TraesCS1A03G0916800	c.1020-4_1020-3insTCTTTCAAATCTTGCAAAATGCCCTGCCTCCACTCTCCAGATACTAGGTGCTGAGAAGGCGCTCTT
1A	549093682	596868303	25	0.982	0	-0.982	0.438	55	41	553372000	G	GAAGAGCGCCTTCTCAGCACCTAGTATCTGGAGAGTGGAGGCAGGGCATTTTGCAAGATTTGAAAGA	INDEL	upstream_gene_variant	MODIFIER	TraesCS1A03G0916700.1	-1	TraesCS1A03G0916700	c.-2822_-2821insTCTTTCAAATCTTGCAAAATGCCCTGCCTCCACTCTCCAGATACTAGGTGCTGAGAAGGCGCTCTT
1A	549093682	596868303	25	0.812	0	-0.812	0.574	32	29	556533142	C	CATGAGTTT	INDEL	splice_acceptor_variant&intron_variant	HIGH	TraesCS1A03G0936500.2	13	TraesCS1A03G0936500	c.1333-1_1333insAAACTCAT
1A	549093682	596868303	25	0.812	0	-0.812	0.574	32	29	556533142	C	CATGAGTTT	INDEL	splice_acceptor_variant&intron_variant	HIGH	TraesCS1A03G0936500.3	13	TraesCS1A03G0936500	c.1294-1_1294insAAACTCAT
1A	549093682	596868303	25	0.812	0	-0.812	0.574	32	29	556533142	C	CATGAGTTT	INDEL	upstream_gene_variant	MODIFIER	TraesCS1A03G0936400.1	-1	TraesCS1A03G0936400	c.-2581_-2580insAAACTCAT
1A	549093682	596868303	25	0.812	0	-0.812	0.574	32	29	556533142	C	CATGAGTTT	INDEL	upstream_gene_variant	MODIFIER	TraesCS1A03G0936600LC.1	-1	TraesCS1A03G0936600LC	c.-2549_-2548insATGAGTTT
1A	549093682	596868303	25	0.812	0	-0.812	0.574	32	29	556533142	C	CATGAGTTT	INDEL	intron_variant	MODIFIER	TraesCS1A03G0936500.1	11	TraesCS1A03G0936500	c.1069-13_1069-12insAAACTCAT
1A	549093682	596868303	25	0.812	0	-0.812	0.574	32	29	556533142	C	CATGAGTTT	INDEL	intron_variant	MODIFIER	TraesCS1A03G0936500.4	13	TraesCS1A03G0936500	c.1332+483_1332+484insAAACTCAT
1A	549093682	596868303	25	0	0.958	0.958	0.646	41	24	576998969	G	GAATCAATTTAAGCAGAGAGTTTGGATCCGAGGAGCTCGCCCGGAGGAAGAAGA	INDEL	splice_donor_variant&intron_variant	HIGH	TraesCS1A03G1009400.1	5	TraesCS1A03G1009400	c.474_474+1insAATCAATTTAAGCAGAGAGTTTGGATCCGAGGAGCTCGCCCGGAGGAAGAAGA
1A	549093682	596868303	25	0	0.958	0.958	0.646	41	24	576998969	G	GAATCAATTTAAGCAGAGAGTTTGGATCCGAGGAGCTCGCCCGGAGGAAGAAGA	INDEL	upstream_gene_variant	MODIFIER	TraesCS1A03G1009700LC.1	-1	TraesCS1A03G1009700LC	c.-2577_-2576insAATCAATTTAAGCAGAGAGTTTGGATCCGAGGAGCTCGCCCGGAGGAAGAAGA
1A	549093682	596868303	25	0	0.958	0.958	0.646	41	24	576998969	G	GAATCAATTTAAGCAGAGAGTTTGGATCCGAGGAGCTCGCCCGGAGGAAGAAGA	INDEL	downstream_gene_variant	MODIFIER	TraesCS1A03G1009500LC.1	-1	TraesCS1A03G1009500LC	c.*1818_*1819insTCTTCTTCCTCCGGGCGAGCTCCTCGGATCCAAACTCTCTGCTTAAATTGATT
1A	549093682	596868303	25	0	0.958	0.958	0.646	41	24	576998969	G	GAATCAATTTAAGCAGAGAGTTTGGATCCGAGGAGCTCGCCCGGAGGAAGAAGA	INDEL	downstream_gene_variant	MODIFIER	TraesCS1A03G1009600LC.1	-1	TraesCS1A03G1009600LC	c.*2221_*2222insTCTTCTTCCTCCGGGCGAGCTCCTCGGATCCAAACTCTCTGCTTAAATTGATT
1A	549093682	596868303	25	0.906	0	-0.906	0.612	96	128	587064246	C	CGTT	INDEL	splice_acceptor_variant&intron_variant	HIGH	TraesCS1A03G1044100.1	8	TraesCS1A03G1044100	c.889-1_889insAAC
1A	549093682	596868303	25	0.757	0	-0.757	0.556	37	26	593056887	T	TCGCCGAAGAACTCGGTTGAGATCTGGCGGGGGCGCATGAGCCGGCGTCCCTCCTCCTCGACCGCGGCCTGC	INDEL	splice_region_variant&intron_variant	LOW	TraesCS1A03G1067100.1	2	TraesCS1A03G1067100	c.-54-3_-54-2insGCAGGCCGCGGTCGAGGAGGAGGGACGCCGGCTCATGCGCCCCCGCCAGATCTCAACCGAGTTCTTCGGCG
1A	549093682	596868303	25	0.757	0	-0.757	0.556	37	26	593056887	T	TCGCCGAAGAACTCGGTTGAGATCTGGCGGGGGCGCATGAGCCGGCGTCCCTCCTCCTCGACCGCGGCCTGC	INDEL	intron_variant	MODIFIER	TraesCS1A03G1067100.2	2	TraesCS1A03G1067100	c.129+251_129+252insGCAGGCCGCGGTCGAGGAGGAGGGACGCCGGCTCATGCGCCCCCGCCAGATCTCAACCGAGTTCTTCGGCG
1A	549093682	596868303	25	0.922	0	-0.922	0.438	64	41	593057276	GCCTGCGAACAATACATCGGCATCGGTTAGGGATTAAGGACGACAAGTCCGTCACGAATCACCACCGCCGGCCCCGGCCGCCTACGAGATCTATCGGATTGCAGTTGTATGGAGATTTGGGTAGGTTTTGGTGCGCGTA	G	INDEL	splice_acceptor_variant&splice_donor_variant&splice_region_variant&5_prime_UTR_variant&intron_variant	HIGH	TraesCS1A03G1067100.2	2	TraesCS1A03G1067100	c.-11+2_-10del
1A	549093682	596868303	25	0.922	0	-0.922	0.438	64	41	593057276	GCCTGCGAACAATACATCGGCATCGGTTAGGGATTAAGGACGACAAGTCCGTCACGAATCACCACCGCCGGCCCCGGCCGCCTACGAGATCTATCGGATTGCAGTTGTATGGAGATTTGGGTAGGTTTTGGTGCGCGTA	G	INDEL	splice_acceptor_variant&splice_donor_variant&splice_region_variant&5_prime_UTR_variant&intron_variant	HIGH	TraesCS1A03G1067100.1	2	TraesCS1A03G1067100	c.-194+2_-193del
1A	549093682	596868303	25	0.922	0	-0.922	0.438	64	41	593057276	GCCTGCGAACAATACATCGGCATCGGTTAGGGATTAAGGACGACAAGTCCGTCACGAATCACCACCGCCGGCCCCGGCCGCCTACGAGATCTATCGGATTGCAGTTGTATGGAGATTTGGGTAGGTTTTGGTGCGCGTA	G	INDEL	splice_region_variant	LOW	TraesCS1A03G1067100.2	2	TraesCS1A03G1067100	c.-11+2_-10del
1A	549093682	596868303	25	0.922	0	-0.922	0.438	64	41	593057276	GCCTGCGAACAATACATCGGCATCGGTTAGGGATTAAGGACGACAAGTCCGTCACGAATCACCACCGCCGGCCCCGGCCGCCTACGAGATCTATCGGATTGCAGTTGTATGGAGATTTGGGTAGGTTTTGGTGCGCGTA	G	INDEL	splice_region_variant	LOW	TraesCS1A03G1067100.1	2	TraesCS1A03G1067100	c.-194+2_-193del
1A	549093682	596868303	25	0.922	0	-0.922	0.438	64	41	593057276	GCCTGCGAACAATACATCGGCATCGGTTAGGGATTAAGGACGACAAGTCCGTCACGAATCACCACCGCCGGCCCCGGCCGCCTACGAGATCTATCGGATTGCAGTTGTATGGAGATTTGGGTAGGTTTTGGTGCGCGTA	G	INDEL	non_coding_transcript_variant	MODIFIER	TraesCS1A03G1067100.2	2	TraesCS1A03G1067100	c.-11+2_-10del
1A	549093682	596868303	25	0.922	0	-0.922	0.438	64	41	593057276	GCCTGCGAACAATACATCGGCATCGGTTAGGGATTAAGGACGACAAGTCCGTCACGAATCACCACCGCCGGCCCCGGCCGCCTACGAGATCTATCGGATTGCAGTTGTATGGAGATTTGGGTAGGTTTTGGTGCGCGTA	G	INDEL	non_coding_transcript_variant	MODIFIER	TraesCS1A03G1067100.1	2	TraesCS1A03G1067100	c.-194+2_-193del
1A	549093682	596868303	25	0	0.861	0.861	0.689	343	194	594904037	T	TAAG	INDEL	splice_region_variant&intron_variant	LOW	TraesCS1A03G1076200.3	11	TraesCS1A03G1076200	c.1789-3_1789-2insCTT
1A	549093682	596868303	25	0	0.861	0.861	0.689	343	194	594904037	T	TAAG	INDEL	splice_region_variant&intron_variant	LOW	TraesCS1A03G1076200.1	11	TraesCS1A03G1076200	c.1682-3_1682-2insCTT
1A	549093682	596868303	25	0	0.861	0.861	0.689	343	194	594904037	T	TAAG	INDEL	splice_region_variant&intron_variant	LOW	TraesCS1A03G1076200.2	11	TraesCS1A03G1076200	c.1774-3_1774-2insCTT
1A	549093682	596868303	25	0	0.861	0.861	0.689	343	194	594904037	T	TAAG	INDEL	splice_region_variant&intron_variant	LOW	TraesCS1A03G1076200.4	11	TraesCS1A03G1076200	c.*1-3_*1-2insCTT
1A	549093682	596868303	25	0	0.861	0.861	0.689	343	194	594904037	T	TAAG	INDEL	splice_region_variant&intron_variant	LOW	TraesCS1A03G1076200.5	11	TraesCS1A03G1076200	c.*620-3_*620-2insCTT
1A	549093682	596868303	25	0	0.861	0.861	0.673	316	194	594904039	A	AAAC	INDEL	splice_region_variant&intron_variant	LOW	TraesCS1A03G1076200.3	11	TraesCS1A03G1076200	c.1789-5_1789-4insGTT
1A	549093682	596868303	25	0	0.861	0.861	0.673	316	194	594904039	A	AAAC	INDEL	splice_region_variant&intron_variant	LOW	TraesCS1A03G1076200.1	11	TraesCS1A03G1076200	c.1682-5_1682-4insGTT
1A	549093682	596868303	25	0	0.861	0.861	0.673	316	194	594904039	A	AAAC	INDEL	splice_region_variant&intron_variant	LOW	TraesCS1A03G1076200.2	11	TraesCS1A03G1076200	c.1774-5_1774-4insGTT
1A	549093682	596868303	25	0	0.861	0.861	0.673	316	194	594904039	A	AAAC	INDEL	splice_region_variant&intron_variant	LOW	TraesCS1A03G1076200.4	11	TraesCS1A03G1076200	c.*1-5_*1-4insGTT
1A	549093682	596868303	25	0	0.861	0.861	0.673	316	194	594904039	A	AAAC	INDEL	splice_region_variant&intron_variant	LOW	TraesCS1A03G1076200.5	11	TraesCS1A03G1076200	c.*620-5_*620-4insGTT
1A	549093682	596868303	25	0	0.975	0.975	0.329	72	159	596650656	AAGGTACCACCCAGAGCCACTATGACTTGCTTTATGTTGCCTGTCAATGACAGATATTTCTCTTGCACAGCTGCTCACTAAGTACATTGTGTGTGTGTGTGTGTGTGTGTGTGTGTGTGTGTGC	A	INDEL	frameshift_variant&splice_donor_variant&splice_region_variant&intron_variant	HIGH	TraesCS1A03G1081600.1	4	TraesCS1A03G1081600	c.482_484-3del	p.Lys161fs
1A	549093682	596868303	25	0	0.975	0.975	0.329	72	159	596650656	AAGGTACCACCCAGAGCCACTATGACTTGCTTTATGTTGCCTGTCAATGACAGATATTTCTCTTGCACAGCTGCTCACTAAGTACATTGTGTGTGTGTGTGTGTGTGTGTGTGTGTGTGTGTGC	A	INDEL	downstream_gene_variant	MODIFIER	TraesCS1A03G1081700.1	-1	TraesCS1A03G1081700	c.*1867_*1989del
1A	549093682	596868303	25	0	0.946	0.946	0.437	201	296	596651008	GGGTATGTATGTGCAACATCCAACCCTTAACTAACTAACTAACCAACCAACTGATGAATCAATCAATCAATCATTCATTCATTCGTGCATAATTGAGAGCTAGCTAGAATCTCGCTTGCTGCCTCTAACTAACTAGTATTGGTATGCAACACATGATTATGGCA	G	INDEL	frameshift_variant&splice_acceptor_variant&splice_donor_variant&splice_region_variant&intron_variant	HIGH	TraesCS1A03G1081600.1	5	TraesCS1A03G1081600	c.711_712-2del	p.Val238fs
1A	549093682	596868303	25	0	0.946	0.946	0.437	201	296	596651008	GGGTATGTATGTGCAACATCCAACCCTTAACTAACTAACTAACCAACCAACTGATGAATCAATCAATCAATCATTCATTCATTCGTGCATAATTGAGAGCTAGCTAGAATCTCGCTTGCTGCCTCTAACTAACTAGTATTGGTATGCAACACATGATTATGGCA	G	INDEL	downstream_gene_variant	MODIFIER	TraesCS1A03G1081700.1	-1	TraesCS1A03G1081700	c.*1475_*1637del
1A	549093682	596868303	25	0	0.833	0.833	0.6	26	24	596868303	G	GGAGACA	INDEL	splice_donor_variant&intron_variant	HIGH	TraesCS1A03G1082000.1	1	TraesCS1A03G1082000	c.225+1_225+2insGAGACA
1A	549093682	596868303	25	0	0.833	0.833	0.6	26	24	596868303	G	GGAGACA	INDEL	splice_donor_variant&intron_variant	HIGH	TraesCS1A03G1082000.2	1	TraesCS1A03G1082000	c.15+1_15+2insGAGACA
1A	549093682	596868303	25	0	0.833	0.833	0.6	26	24	596868303	G	GGAGACA	INDEL	downstream_gene_variant	MODIFIER	TraesCS1A03G1082100.1	-1	TraesCS1A03G1082100	c.*4424_*4425insTGTCTC
1A	551361856	597314533	33	0.919	0	-0.919	0.477	37	28	551361857	G	A	SNP	downstream_gene_variant	MODIFIER	TraesCS1A03G0906700LC.1	-1	TraesCS1A03G0906700LC	c.*1555G>A
1A	551361856	597314533	33	0.919	0	-0.919	0.477	37	28	551361857	G	A	SNP	intergenic_region	MODIFIER	TraesCS1A03G0906700LC-TraesCS1A03G0906800	-1	TraesCS1A03G0906700LC-TraesCS1A03G0906800	n.551361857G>A
1A	551361856	597314533	33	0	1	1	0.611	33	21	552317029	G	GGAACAAGTTTGGCTCA	INDEL	splice_donor_variant&intron_variant	HIGH	TraesCS1A03G0910900.1	3	TraesCS1A03G0910900	c.608_608+1insGAACAAGTTTGGCTCA
1A	551361856	597314533	33	0	1	1	0.611	33	21	552317029	G	GGAACAAGTTTGGCTCA	INDEL	upstream_gene_variant	MODIFIER	TraesCS1A03G0911000.1	-1	TraesCS1A03G0911000	c.-2659_-2658insGAACAAGTTTGGCTCA
1A	551361856	597314533	33	0	1	1	0.825	326	69	552505707	C	CAATGGAAAGCTTGTGTTCGAGTCTTCTGAAAAGCTTTTCCTTTTCTGAT	INDEL	splice_acceptor_variant&intron_variant	HIGH	TraesCS1A03G0911900.1	4	TraesCS1A03G0911900	c.1519-1_1519insATCAGAAAAGGAAAAGCTTTTCAGAAGACTCGAACACAAGCTTTCCATT
1A	551361856	597314533	33	0.972	0	-0.972	0.603	251	363	553208106	T	TGGAAACTTTGAACACCCTCCTTAAGATCC	INDEL	splice_region_variant&intron_variant	LOW	TraesCS1A03G0915700.1	8	TraesCS1A03G0915700	c.1552-3_1552-2insGGATCTTAAGGAGGGTGTTCAAAGTTTCC
1A	551361856	597314533	33	0.972	0	-0.972	0.603	251	363	553208106	T	TGGAAACTTTGAACACCCTCCTTAAGATCC	INDEL	upstream_gene_variant	MODIFIER	TraesCS1A03G0915600.1	-1	TraesCS1A03G0915600	c.-2908_-2907insGGATCTTAAGGAGGGTGTTCAAAGTTTCC
1A	551361856	597314533	33	0.982	0	-0.982	0.438	55	41	553372000	G	GAAGAGCGCCTTCTCAGCACCTAGTATCTGGAGAGTGGAGGCAGGGCATTTTGCAAGATTTGAAAGA	INDEL	splice_region_variant&intron_variant	LOW	TraesCS1A03G0916800.1	5	TraesCS1A03G0916800	c.1020-4_1020-3insTCTTTCAAATCTTGCAAAATGCCCTGCCTCCACTCTCCAGATACTAGGTGCTGAGAAGGCGCTCTT
1A	551361856	597314533	33	0.982	0	-0.982	0.438	55	41	553372000	G	GAAGAGCGCCTTCTCAGCACCTAGTATCTGGAGAGTGGAGGCAGGGCATTTTGCAAGATTTGAAAGA	INDEL	splice_region_variant&intron_variant	LOW	TraesCS1A03G0916800.2	5	TraesCS1A03G0916800	c.1020-4_1020-3insTCTTTCAAATCTTGCAAAATGCCCTGCCTCCACTCTCCAGATACTAGGTGCTGAGAAGGCGCTCTT
1A	551361856	597314533	33	0.982	0	-0.982	0.438	55	41	553372000	G	GAAGAGCGCCTTCTCAGCACCTAGTATCTGGAGAGTGGAGGCAGGGCATTTTGCAAGATTTGAAAGA	INDEL	upstream_gene_variant	MODIFIER	TraesCS1A03G0916700.1	-1	TraesCS1A03G0916700	c.-2822_-2821insTCTTTCAAATCTTGCAAAATGCCCTGCCTCCACTCTCCAGATACTAGGTGCTGAGAAGGCGCTCTT
1A	551361856	597314533	33	0.812	0	-0.812	0.574	32	29	556533142	C	CATGAGTTT	INDEL	splice_acceptor_variant&intron_variant	HIGH	TraesCS1A03G0936500.2	13	TraesCS1A03G0936500	c.1333-1_1333insAAACTCAT
1A	551361856	597314533	33	0.812	0	-0.812	0.574	32	29	556533142	C	CATGAGTTT	INDEL	splice_acceptor_variant&intron_variant	HIGH	TraesCS1A03G0936500.3	13	TraesCS1A03G0936500	c.1294-1_1294insAAACTCAT
1A	551361856	597314533	33	0.812	0	-0.812	0.574	32	29	556533142	C	CATGAGTTT	INDEL	upstream_gene_variant	MODIFIER	TraesCS1A03G0936400.1	-1	TraesCS1A03G0936400	c.-2581_-2580insAAACTCAT
1A	551361856	597314533	33	0.812	0	-0.812	0.574	32	29	556533142	C	CATGAGTTT	INDEL	upstream_gene_variant	MODIFIER	TraesCS1A03G0936600LC.1	-1	TraesCS1A03G0936600LC	c.-2549_-2548insATGAGTTT
1A	551361856	597314533	33	0.812	0	-0.812	0.574	32	29	556533142	C	CATGAGTTT	INDEL	intron_variant	MODIFIER	TraesCS1A03G0936500.1	11	TraesCS1A03G0936500	c.1069-13_1069-12insAAACTCAT
1A	551361856	597314533	33	0.812	0	-0.812	0.574	32	29	556533142	C	CATGAGTTT	INDEL	intron_variant	MODIFIER	TraesCS1A03G0936500.4	13	TraesCS1A03G0936500	c.1332+483_1332+484insAAACTCAT
1A	551361856	597314533	33	0	0.958	0.958	0.646	41	24	576998969	G	GAATCAATTTAAGCAGAGAGTTTGGATCCGAGGAGCTCGCCCGGAGGAAGAAGA	INDEL	splice_donor_variant&intron_variant	HIGH	TraesCS1A03G1009400.1	5	TraesCS1A03G1009400	c.474_474+1insAATCAATTTAAGCAGAGAGTTTGGATCCGAGGAGCTCGCCCGGAGGAAGAAGA
1A	551361856	597314533	33	0	0.958	0.958	0.646	41	24	576998969	G	GAATCAATTTAAGCAGAGAGTTTGGATCCGAGGAGCTCGCCCGGAGGAAGAAGA	INDEL	upstream_gene_variant	MODIFIER	TraesCS1A03G1009700LC.1	-1	TraesCS1A03G1009700LC	c.-2577_-2576insAATCAATTTAAGCAGAGAGTTTGGATCCGAGGAGCTCGCCCGGAGGAAGAAGA
1A	551361856	597314533	33	0	0.958	0.958	0.646	41	24	576998969	G	GAATCAATTTAAGCAGAGAGTTTGGATCCGAGGAGCTCGCCCGGAGGAAGAAGA	INDEL	downstream_gene_variant	MODIFIER	TraesCS1A03G1009500LC.1	-1	TraesCS1A03G1009500LC	c.*1818_*1819insTCTTCTTCCTCCGGGCGAGCTCCTCGGATCCAAACTCTCTGCTTAAATTGATT
1A	551361856	597314533	33	0	0.958	0.958	0.646	41	24	576998969	G	GAATCAATTTAAGCAGAGAGTTTGGATCCGAGGAGCTCGCCCGGAGGAAGAAGA	INDEL	downstream_gene_variant	MODIFIER	TraesCS1A03G1009600LC.1	-1	TraesCS1A03G1009600LC	c.*2221_*2222insTCTTCTTCCTCCGGGCGAGCTCCTCGGATCCAAACTCTCTGCTTAAATTGATT
1A	551361856	597314533	33	0.906	0	-0.906	0.612	96	128	587064246	C	CGTT	INDEL	splice_acceptor_variant&intron_variant	HIGH	TraesCS1A03G1044100.1	8	TraesCS1A03G1044100	c.889-1_889insAAC
1A	551361856	597314533	33	0.757	0	-0.757	0.556	37	26	593056887	T	TCGCCGAAGAACTCGGTTGAGATCTGGCGGGGGCGCATGAGCCGGCGTCCCTCCTCCTCGACCGCGGCCTGC	INDEL	splice_region_variant&intron_variant	LOW	TraesCS1A03G1067100.1	2	TraesCS1A03G1067100	c.-54-3_-54-2insGCAGGCCGCGGTCGAGGAGGAGGGACGCCGGCTCATGCGCCCCCGCCAGATCTCAACCGAGTTCTTCGGCG
1A	551361856	597314533	33	0.757	0	-0.757	0.556	37	26	593056887	T	TCGCCGAAGAACTCGGTTGAGATCTGGCGGGGGCGCATGAGCCGGCGTCCCTCCTCCTCGACCGCGGCCTGC	INDEL	intron_variant	MODIFIER	TraesCS1A03G1067100.2	2	TraesCS1A03G1067100	c.129+251_129+252insGCAGGCCGCGGTCGAGGAGGAGGGACGCCGGCTCATGCGCCCCCGCCAGATCTCAACCGAGTTCTTCGGCG
1A	551361856	597314533	33	0.922	0	-0.922	0.438	64	41	593057276	GCCTGCGAACAATACATCGGCATCGGTTAGGGATTAAGGACGACAAGTCCGTCACGAATCACCACCGCCGGCCCCGGCCGCCTACGAGATCTATCGGATTGCAGTTGTATGGAGATTTGGGTAGGTTTTGGTGCGCGTA	G	INDEL	splice_acceptor_variant&splice_donor_variant&splice_region_variant&5_prime_UTR_variant&intron_variant	HIGH	TraesCS1A03G1067100.2	2	TraesCS1A03G1067100	c.-11+2_-10del
1A	551361856	597314533	33	0.922	0	-0.922	0.438	64	41	593057276	GCCTGCGAACAATACATCGGCATCGGTTAGGGATTAAGGACGACAAGTCCGTCACGAATCACCACCGCCGGCCCCGGCCGCCTACGAGATCTATCGGATTGCAGTTGTATGGAGATTTGGGTAGGTTTTGGTGCGCGTA	G	INDEL	splice_acceptor_variant&splice_donor_variant&splice_region_variant&5_prime_UTR_variant&intron_variant	HIGH	TraesCS1A03G1067100.1	2	TraesCS1A03G1067100	c.-194+2_-193del
1A	551361856	597314533	33	0.922	0	-0.922	0.438	64	41	593057276	GCCTGCGAACAATACATCGGCATCGGTTAGGGATTAAGGACGACAAGTCCGTCACGAATCACCACCGCCGGCCCCGGCCGCCTACGAGATCTATCGGATTGCAGTTGTATGGAGATTTGGGTAGGTTTTGGTGCGCGTA	G	INDEL	splice_region_variant	LOW	TraesCS1A03G1067100.2	2	TraesCS1A03G1067100	c.-11+2_-10del
1A	551361856	597314533	33	0.922	0	-0.922	0.438	64	41	593057276	GCCTGCGAACAATACATCGGCATCGGTTAGGGATTAAGGACGACAAGTCCGTCACGAATCACCACCGCCGGCCCCGGCCGCCTACGAGATCTATCGGATTGCAGTTGTATGGAGATTTGGGTAGGTTTTGGTGCGCGTA	G	INDEL	splice_region_variant	LOW	TraesCS1A03G1067100.1	2	TraesCS1A03G1067100	c.-194+2_-193del
1A	551361856	597314533	33	0.922	0	-0.922	0.438	64	41	593057276	GCCTGCGAACAATACATCGGCATCGGTTAGGGATTAAGGACGACAAGTCCGTCACGAATCACCACCGCCGGCCCCGGCCGCCTACGAGATCTATCGGATTGCAGTTGTATGGAGATTTGGGTAGGTTTTGGTGCGCGTA	G	INDEL	non_coding_transcript_variant	MODIFIER	TraesCS1A03G1067100.2	2	TraesCS1A03G1067100	c.-11+2_-10del
1A	551361856	597314533	33	0.922	0	-0.922	0.438	64	41	593057276	GCCTGCGAACAATACATCGGCATCGGTTAGGGATTAAGGACGACAAGTCCGTCACGAATCACCACCGCCGGCCCCGGCCGCCTACGAGATCTATCGGATTGCAGTTGTATGGAGATTTGGGTAGGTTTTGGTGCGCGTA	G	INDEL	non_coding_transcript_variant	MODIFIER	TraesCS1A03G1067100.1	2	TraesCS1A03G1067100	c.-194+2_-193del
1A	551361856	597314533	33	0	0.861	0.861	0.689	343	194	594904037	T	TAAG	INDEL	splice_region_variant&intron_variant	LOW	TraesCS1A03G1076200.3	11	TraesCS1A03G1076200	c.1789-3_1789-2insCTT
1A	551361856	597314533	33	0	0.861	0.861	0.689	343	194	594904037	T	TAAG	INDEL	splice_region_variant&intron_variant	LOW	TraesCS1A03G1076200.1	11	TraesCS1A03G1076200	c.1682-3_1682-2insCTT
1A	551361856	597314533	33	0	0.861	0.861	0.689	343	194	594904037	T	TAAG	INDEL	splice_region_variant&intron_variant	LOW	TraesCS1A03G1076200.2	11	TraesCS1A03G1076200	c.1774-3_1774-2insCTT
1A	551361856	597314533	33	0	0.861	0.861	0.689	343	194	594904037	T	TAAG	INDEL	splice_region_variant&intron_variant	LOW	TraesCS1A03G1076200.4	11	TraesCS1A03G1076200	c.*1-3_*1-2insCTT
1A	551361856	597314533	33	0	0.861	0.861	0.689	343	194	594904037	T	TAAG	INDEL	splice_region_variant&intron_variant	LOW	TraesCS1A03G1076200.5	11	TraesCS1A03G1076200	c.*620-3_*620-2insCTT
1A	551361856	597314533	33	0	0.861	0.861	0.673	316	194	594904039	A	AAAC	INDEL	splice_region_variant&intron_variant	LOW	TraesCS1A03G1076200.3	11	TraesCS1A03G1076200	c.1789-5_1789-4insGTT
1A	551361856	597314533	33	0	0.861	0.861	0.673	316	194	594904039	A	AAAC	INDEL	splice_region_variant&intron_variant	LOW	TraesCS1A03G1076200.1	11	TraesCS1A03G1076200	c.1682-5_1682-4insGTT
1A	551361856	597314533	33	0	0.861	0.861	0.673	316	194	594904039	A	AAAC	INDEL	splice_region_variant&intron_variant	LOW	TraesCS1A03G1076200.2	11	TraesCS1A03G1076200	c.1774-5_1774-4insGTT
1A	551361856	597314533	33	0	0.861	0.861	0.673	316	194	594904039	A	AAAC	INDEL	splice_region_variant&intron_variant	LOW	TraesCS1A03G1076200.4	11	TraesCS1A03G1076200	c.*1-5_*1-4insGTT
1A	551361856	597314533	33	0	0.861	0.861	0.673	316	194	594904039	A	AAAC	INDEL	splice_region_variant&intron_variant	LOW	TraesCS1A03G1076200.5	11	TraesCS1A03G1076200	c.*620-5_*620-4insGTT
1A	551361856	597314533	33	0	0.975	0.975	0.329	72	159	596650656	AAGGTACCACCCAGAGCCACTATGACTTGCTTTATGTTGCCTGTCAATGACAGATATTTCTCTTGCACAGCTGCTCACTAAGTACATTGTGTGTGTGTGTGTGTGTGTGTGTGTGTGTGTGTGC	A	INDEL	frameshift_variant&splice_donor_variant&splice_region_variant&intron_variant	HIGH	TraesCS1A03G1081600.1	4	TraesCS1A03G1081600	c.482_484-3del	p.Lys161fs
1A	551361856	597314533	33	0	0.975	0.975	0.329	72	159	596650656	AAGGTACCACCCAGAGCCACTATGACTTGCTTTATGTTGCCTGTCAATGACAGATATTTCTCTTGCACAGCTGCTCACTAAGTACATTGTGTGTGTGTGTGTGTGTGTGTGTGTGTGTGTGTGC	A	INDEL	downstream_gene_variant	MODIFIER	TraesCS1A03G1081700.1	-1	TraesCS1A03G1081700	c.*1867_*1989del
1A	551361856	597314533	33	0	0.946	0.946	0.437	201	296	596651008	GGGTATGTATGTGCAACATCCAACCCTTAACTAACTAACTAACCAACCAACTGATGAATCAATCAATCAATCATTCATTCATTCGTGCATAATTGAGAGCTAGCTAGAATCTCGCTTGCTGCCTCTAACTAACTAGTATTGGTATGCAACACATGATTATGGCA	G	INDEL	frameshift_variant&splice_acceptor_variant&splice_donor_variant&splice_region_variant&intron_variant	HIGH	TraesCS1A03G1081600.1	5	TraesCS1A03G1081600	c.711_712-2del	p.Val238fs
1A	551361856	597314533	33	0	0.946	0.946	0.437	201	296	596651008	GGGTATGTATGTGCAACATCCAACCCTTAACTAACTAACTAACCAACCAACTGATGAATCAATCAATCAATCATTCATTCATTCGTGCATAATTGAGAGCTAGCTAGAATCTCGCTTGCTGCCTCTAACTAACTAGTATTGGTATGCAACACATGATTATGGCA	G	INDEL	downstream_gene_variant	MODIFIER	TraesCS1A03G1081700.1	-1	TraesCS1A03G1081700	c.*1475_*1637del
1A	551361856	597314533	33	0	0.833	0.833	0.6	26	24	596868303	G	GGAGACA	INDEL	splice_donor_variant&intron_variant	HIGH	TraesCS1A03G1082000.1	1	TraesCS1A03G1082000	c.225+1_225+2insGAGACA
1A	551361856	597314533	33	0	0.833	0.833	0.6	26	24	596868303	G	GGAGACA	INDEL	splice_donor_variant&intron_variant	HIGH	TraesCS1A03G1082000.2	1	TraesCS1A03G1082000	c.15+1_15+2insGAGACA
1A	551361856	597314533	33	0	0.833	0.833	0.6	26	24	596868303	G	GGAGACA	INDEL	downstream_gene_variant	MODIFIER	TraesCS1A03G1082100.1	-1	TraesCS1A03G1082100	c.*4424_*4425insTGTCTC
1A	551361856	597314533	33	0	0.833	0.833	0.6	26	24	596868304	T	TGGGGCAGCCATCCCTGATATCAGAGTACGACCTGGGAGCA	INDEL	splice_region_variant&intron_variant	LOW	TraesCS1A03G1082000.1	1	TraesCS1A03G1082000	c.225+2_225+3insGGGGCAGCCATCCCTGATATCAGAGTACGACCTGGGAGCA
1A	551361856	597314533	33	0	0.833	0.833	0.6	26	24	596868304	T	TGGGGCAGCCATCCCTGATATCAGAGTACGACCTGGGAGCA	INDEL	splice_region_variant&intron_variant	LOW	TraesCS1A03G1082000.2	1	TraesCS1A03G1082000	c.15+2_15+3insGGGGCAGCCATCCCTGATATCAGAGTACGACCTGGGAGCA
1A	551361856	597314533	33	0	0.833	0.833	0.6	26	24	596868304	T	TGGGGCAGCCATCCCTGATATCAGAGTACGACCTGGGAGCA	INDEL	downstream_gene_variant	MODIFIER	TraesCS1A03G1082100.1	-1	TraesCS1A03G1082100	c.*4423_*4424insTGCTCCCAGGTCGTACTCTGATATCAGGGATGGCTGCCCC
1A	551361856	597314533	33	0	0.825	0.825	0.598	42	40	597314531	G	GAATTCGGC	INDEL	splice_region_variant&intron_variant	LOW	TraesCS1A03G1083800.1	3	TraesCS1A03G1083800	c.297-4_297-3insGCCGAATT
1A	551361856	597314533	33	0	0.825	0.825	0.598	42	40	597314531	G	GAATTCGGC	INDEL	upstream_gene_variant	MODIFIER	TraesCS1A03G1083700LC.1	-1	TraesCS1A03G1083700LC	c.-1280_-1279insGCCGAATT
1A	551361856	597314533	33	0	0.825	0.825	0.588	40	40	597314533	A	ATGTCGCTGGATGGG	INDEL	splice_region_variant&intron_variant	LOW	TraesCS1A03G1083800.1	3	TraesCS1A03G1083800	c.297-6_297-5insCCCATCCAGCGACA
1A	551361856	597314533	33	0	0.825	0.825	0.588	40	40	597314533	A	ATGTCGCTGGATGGG	INDEL	upstream_gene_variant	MODIFIER	TraesCS1A03G1083700LC.1	-1	TraesCS1A03G1083700LC	c.-1282_-1281insCCCATCCAGCGACA
1A	556533141	597314533	100	0.812	0	-0.812	0.574	32	29	556533142	C	CATGAGTTT	INDEL	splice_acceptor_variant&intron_variant	HIGH	TraesCS1A03G0936500.2	13	TraesCS1A03G0936500	c.1333-1_1333insAAACTCAT
1A	556533141	597314533	100	0.812	0	-0.812	0.574	32	29	556533142	C	CATGAGTTT	INDEL	splice_acceptor_variant&intron_variant	HIGH	TraesCS1A03G0936500.3	13	TraesCS1A03G0936500	c.1294-1_1294insAAACTCAT
1A	556533141	597314533	100	0.812	0	-0.812	0.574	32	29	556533142	C	CATGAGTTT	INDEL	upstream_gene_variant	MODIFIER	TraesCS1A03G0936400.1	-1	TraesCS1A03G0936400	c.-2581_-2580insAAACTCAT
1A	556533141	597314533	100	0.812	0	-0.812	0.574	32	29	556533142	C	CATGAGTTT	INDEL	upstream_gene_variant	MODIFIER	TraesCS1A03G0936600LC.1	-1	TraesCS1A03G0936600LC	c.-2549_-2548insATGAGTTT
1A	556533141	597314533	100	0.812	0	-0.812	0.574	32	29	556533142	C	CATGAGTTT	INDEL	intron_variant	MODIFIER	TraesCS1A03G0936500.1	11	TraesCS1A03G0936500	c.1069-13_1069-12insAAACTCAT
1A	556533141	597314533	100	0.812	0	-0.812	0.574	32	29	556533142	C	CATGAGTTT	INDEL	intron_variant	MODIFIER	TraesCS1A03G0936500.4	13	TraesCS1A03G0936500	c.1332+483_1332+484insAAACTCAT
1A	556533141	597314533	100	0	0.958	0.958	0.646	41	24	576998969	G	GAATCAATTTAAGCAGAGAGTTTGGATCCGAGGAGCTCGCCCGGAGGAAGAAGA	INDEL	splice_donor_variant&intron_variant	HIGH	TraesCS1A03G1009400.1	5	TraesCS1A03G1009400	c.474_474+1insAATCAATTTAAGCAGAGAGTTTGGATCCGAGGAGCTCGCCCGGAGGAAGAAGA
1A	556533141	597314533	100	0	0.958	0.958	0.646	41	24	576998969	G	GAATCAATTTAAGCAGAGAGTTTGGATCCGAGGAGCTCGCCCGGAGGAAGAAGA	INDEL	upstream_gene_variant	MODIFIER	TraesCS1A03G1009700LC.1	-1	TraesCS1A03G1009700LC	c.-2577_-2576insAATCAATTTAAGCAGAGAGTTTGGATCCGAGGAGCTCGCCCGGAGGAAGAAGA
1A	556533141	597314533	100	0	0.958	0.958	0.646	41	24	576998969	G	GAATCAATTTAAGCAGAGAGTTTGGATCCGAGGAGCTCGCCCGGAGGAAGAAGA	INDEL	downstream_gene_variant	MODIFIER	TraesCS1A03G1009500LC.1	-1	TraesCS1A03G1009500LC	c.*1818_*1819insTCTTCTTCCTCCGGGCGAGCTCCTCGGATCCAAACTCTCTGCTTAAATTGATT
1A	556533141	597314533	100	0	0.958	0.958	0.646	41	24	576998969	G	GAATCAATTTAAGCAGAGAGTTTGGATCCGAGGAGCTCGCCCGGAGGAAGAAGA	INDEL	downstream_gene_variant	MODIFIER	TraesCS1A03G1009600LC.1	-1	TraesCS1A03G1009600LC	c.*2221_*2222insTCTTCTTCCTCCGGGCGAGCTCCTCGGATCCAAACTCTCTGCTTAAATTGATT
1A	556533141	597314533	100	0.906	0	-0.906	0.612	96	128	587064246	C	CGTT	INDEL	splice_acceptor_variant&intron_variant	HIGH	TraesCS1A03G1044100.1	8	TraesCS1A03G1044100	c.889-1_889insAAC
1A	556533141	597314533	100	0.757	0	-0.757	0.556	37	26	593056887	T	TCGCCGAAGAACTCGGTTGAGATCTGGCGGGGGCGCATGAGCCGGCGTCCCTCCTCCTCGACCGCGGCCTGC	INDEL	splice_region_variant&intron_variant	LOW	TraesCS1A03G1067100.1	2	TraesCS1A03G1067100	c.-54-3_-54-2insGCAGGCCGCGGTCGAGGAGGAGGGACGCCGGCTCATGCGCCCCCGCCAGATCTCAACCGAGTTCTTCGGCG
1A	556533141	597314533	100	0.757	0	-0.757	0.556	37	26	593056887	T	TCGCCGAAGAACTCGGTTGAGATCTGGCGGGGGCGCATGAGCCGGCGTCCCTCCTCCTCGACCGCGGCCTGC	INDEL	intron_variant	MODIFIER	TraesCS1A03G1067100.2	2	TraesCS1A03G1067100	c.129+251_129+252insGCAGGCCGCGGTCGAGGAGGAGGGACGCCGGCTCATGCGCCCCCGCCAGATCTCAACCGAGTTCTTCGGCG
1A	556533141	597314533	100	0.922	0	-0.922	0.438	64	41	593057276	GCCTGCGAACAATACATCGGCATCGGTTAGGGATTAAGGACGACAAGTCCGTCACGAATCACCACCGCCGGCCCCGGCCGCCTACGAGATCTATCGGATTGCAGTTGTATGGAGATTTGGGTAGGTTTTGGTGCGCGTA	G	INDEL	splice_acceptor_variant&splice_donor_variant&splice_region_variant&5_prime_UTR_variant&intron_variant	HIGH	TraesCS1A03G1067100.2	2	TraesCS1A03G1067100	c.-11+2_-10del
1A	556533141	597314533	100	0.922	0	-0.922	0.438	64	41	593057276	GCCTGCGAACAATACATCGGCATCGGTTAGGGATTAAGGACGACAAGTCCGTCACGAATCACCACCGCCGGCCCCGGCCGCCTACGAGATCTATCGGATTGCAGTTGTATGGAGATTTGGGTAGGTTTTGGTGCGCGTA	G	INDEL	splice_acceptor_variant&splice_donor_variant&splice_region_variant&5_prime_UTR_variant&intron_variant	HIGH	TraesCS1A03G1067100.1	2	TraesCS1A03G1067100	c.-194+2_-193del
1A	556533141	597314533	100	0.922	0	-0.922	0.438	64	41	593057276	GCCTGCGAACAATACATCGGCATCGGTTAGGGATTAAGGACGACAAGTCCGTCACGAATCACCACCGCCGGCCCCGGCCGCCTACGAGATCTATCGGATTGCAGTTGTATGGAGATTTGGGTAGGTTTTGGTGCGCGTA	G	INDEL	splice_region_variant	LOW	TraesCS1A03G1067100.2	2	TraesCS1A03G1067100	c.-11+2_-10del
1A	556533141	597314533	100	0.922	0	-0.922	0.438	64	41	593057276	GCCTGCGAACAATACATCGGCATCGGTTAGGGATTAAGGACGACAAGTCCGTCACGAATCACCACCGCCGGCCCCGGCCGCCTACGAGATCTATCGGATTGCAGTTGTATGGAGATTTGGGTAGGTTTTGGTGCGCGTA	G	INDEL	splice_region_variant	LOW	TraesCS1A03G1067100.1	2	TraesCS1A03G1067100	c.-194+2_-193del
1A	556533141	597314533	100	0.922	0	-0.922	0.438	64	41	593057276	GCCTGCGAACAATACATCGGCATCGGTTAGGGATTAAGGACGACAAGTCCGTCACGAATCACCACCGCCGGCCCCGGCCGCCTACGAGATCTATCGGATTGCAGTTGTATGGAGATTTGGGTAGGTTTTGGTGCGCGTA	G	INDEL	non_coding_transcript_variant	MODIFIER	TraesCS1A03G1067100.2	2	TraesCS1A03G1067100	c.-11+2_-10del
1A	556533141	597314533	100	0.922	0	-0.922	0.438	64	41	593057276	GCCTGCGAACAATACATCGGCATCGGTTAGGGATTAAGGACGACAAGTCCGTCACGAATCACCACCGCCGGCCCCGGCCGCCTACGAGATCTATCGGATTGCAGTTGTATGGAGATTTGGGTAGGTTTTGGTGCGCGTA	G	INDEL	non_coding_transcript_variant	MODIFIER	TraesCS1A03G1067100.1	2	TraesCS1A03G1067100	c.-194+2_-193del
1A	556533141	597314533	100	0	0.861	0.861	0.689	343	194	594904037	T	TAAG	INDEL	splice_region_variant&intron_variant	LOW	TraesCS1A03G1076200.3	11	TraesCS1A03G1076200	c.1789-3_1789-2insCTT
1A	556533141	597314533	100	0	0.861	0.861	0.689	343	194	594904037	T	TAAG	INDEL	splice_region_variant&intron_variant	LOW	TraesCS1A03G1076200.1	11	TraesCS1A03G1076200	c.1682-3_1682-2insCTT
1A	556533141	597314533	100	0	0.861	0.861	0.689	343	194	594904037	T	TAAG	INDEL	splice_region_variant&intron_variant	LOW	TraesCS1A03G1076200.2	11	TraesCS1A03G1076200	c.1774-3_1774-2insCTT
1A	556533141	597314533	100	0	0.861	0.861	0.689	343	194	594904037	T	TAAG	INDEL	splice_region_variant&intron_variant	LOW	TraesCS1A03G1076200.4	11	TraesCS1A03G1076200	c.*1-3_*1-2insCTT
1A	556533141	597314533	100	0	0.861	0.861	0.689	343	194	594904037	T	TAAG	INDEL	splice_region_variant&intron_variant	LOW	TraesCS1A03G1076200.5	11	TraesCS1A03G1076200	c.*620-3_*620-2insCTT
1A	556533141	597314533	100	0	0.861	0.861	0.673	316	194	594904039	A	AAAC	INDEL	splice_region_variant&intron_variant	LOW	TraesCS1A03G1076200.3	11	TraesCS1A03G1076200	c.1789-5_1789-4insGTT
1A	556533141	597314533	100	0	0.861	0.861	0.673	316	194	594904039	A	AAAC	INDEL	splice_region_variant&intron_variant	LOW	TraesCS1A03G1076200.1	11	TraesCS1A03G1076200	c.1682-5_1682-4insGTT
1A	556533141	597314533	100	0	0.861	0.861	0.673	316	194	594904039	A	AAAC	INDEL	splice_region_variant&intron_variant	LOW	TraesCS1A03G1076200.2	11	TraesCS1A03G1076200	c.1774-5_1774-4insGTT
1A	556533141	597314533	100	0	0.861	0.861	0.673	316	194	594904039	A	AAAC	INDEL	splice_region_variant&intron_variant	LOW	TraesCS1A03G1076200.4	11	TraesCS1A03G1076200	c.*1-5_*1-4insGTT
1A	556533141	597314533	100	0	0.861	0.861	0.673	316	194	594904039	A	AAAC	INDEL	splice_region_variant&intron_variant	LOW	TraesCS1A03G1076200.5	11	TraesCS1A03G1076200	c.*620-5_*620-4insGTT
1A	556533141	597314533	100	0	0.975	0.975	0.329	72	159	596650656	AAGGTACCACCCAGAGCCACTATGACTTGCTTTATGTTGCCTGTCAATGACAGATATTTCTCTTGCACAGCTGCTCACTAAGTACATTGTGTGTGTGTGTGTGTGTGTGTGTGTGTGTGTGTGC	A	INDEL	frameshift_variant&splice_donor_variant&splice_region_variant&intron_variant	HIGH	TraesCS1A03G1081600.1	4	TraesCS1A03G1081600	c.482_484-3del	p.Lys161fs
1A	556533141	597314533	100	0	0.975	0.975	0.329	72	159	596650656	AAGGTACCACCCAGAGCCACTATGACTTGCTTTATGTTGCCTGTCAATGACAGATATTTCTCTTGCACAGCTGCTCACTAAGTACATTGTGTGTGTGTGTGTGTGTGTGTGTGTGTGTGTGTGC	A	INDEL	downstream_gene_variant	MODIFIER	TraesCS1A03G1081700.1	-1	TraesCS1A03G1081700	c.*1867_*1989del
1A	556533141	597314533	100	0	0.946	0.946	0.437	201	296	596651008	GGGTATGTATGTGCAACATCCAACCCTTAACTAACTAACTAACCAACCAACTGATGAATCAATCAATCAATCATTCATTCATTCGTGCATAATTGAGAGCTAGCTAGAATCTCGCTTGCTGCCTCTAACTAACTAGTATTGGTATGCAACACATGATTATGGCA	G	INDEL	frameshift_variant&splice_acceptor_variant&splice_donor_variant&splice_region_variant&intron_variant	HIGH	TraesCS1A03G1081600.1	5	TraesCS1A03G1081600	c.711_712-2del	p.Val238fs
1A	556533141	597314533	100	0	0.946	0.946	0.437	201	296	596651008	GGGTATGTATGTGCAACATCCAACCCTTAACTAACTAACTAACCAACCAACTGATGAATCAATCAATCAATCATTCATTCATTCGTGCATAATTGAGAGCTAGCTAGAATCTCGCTTGCTGCCTCTAACTAACTAGTATTGGTATGCAACACATGATTATGGCA	G	INDEL	downstream_gene_variant	MODIFIER	TraesCS1A03G1081700.1	-1	TraesCS1A03G1081700	c.*1475_*1637del
1A	556533141	597314533	100	0	0.833	0.833	0.6	26	24	596868303	G	GGAGACA	INDEL	splice_donor_variant&intron_variant	HIGH	TraesCS1A03G1082000.1	1	TraesCS1A03G1082000	c.225+1_225+2insGAGACA
1A	556533141	597314533	100	0	0.833	0.833	0.6	26	24	596868303	G	GGAGACA	INDEL	splice_donor_variant&intron_variant	HIGH	TraesCS1A03G1082000.2	1	TraesCS1A03G1082000	c.15+1_15+2insGAGACA
1A	556533141	597314533	100	0	0.833	0.833	0.6	26	24	596868303	G	GGAGACA	INDEL	downstream_gene_variant	MODIFIER	TraesCS1A03G1082100.1	-1	TraesCS1A03G1082100	c.*4424_*4425insTGTCTC
1A	556533141	597314533	100	0	0.833	0.833	0.6	26	24	596868304	T	TGGGGCAGCCATCCCTGATATCAGAGTACGACCTGGGAGCA	INDEL	splice_region_variant&intron_variant	LOW	TraesCS1A03G1082000.1	1	TraesCS1A03G1082000	c.225+2_225+3insGGGGCAGCCATCCCTGATATCAGAGTACGACCTGGGAGCA
1A	556533141	597314533	100	0	0.833	0.833	0.6	26	24	596868304	T	TGGGGCAGCCATCCCTGATATCAGAGTACGACCTGGGAGCA	INDEL	splice_region_variant&intron_variant	LOW	TraesCS1A03G1082000.2	1	TraesCS1A03G1082000	c.15+2_15+3insGGGGCAGCCATCCCTGATATCAGAGTACGACCTGGGAGCA
1A	556533141	597314533	100	0	0.833	0.833	0.6	26	24	596868304	T	TGGGGCAGCCATCCCTGATATCAGAGTACGACCTGGGAGCA	INDEL	downstream_gene_variant	MODIFIER	TraesCS1A03G1082100.1	-1	TraesCS1A03G1082100	c.*4423_*4424insTGCTCCCAGGTCGTACTCTGATATCAGGGATGGCTGCCCC
1A	556533141	597314533	100	0	0.825	0.825	0.598	42	40	597314531	G	GAATTCGGC	INDEL	splice_region_variant&intron_variant	LOW	TraesCS1A03G1083800.1	3	TraesCS1A03G1083800	c.297-4_297-3insGCCGAATT
1A	556533141	597314533	100	0	0.825	0.825	0.598	42	40	597314531	G	GAATTCGGC	INDEL	upstream_gene_variant	MODIFIER	TraesCS1A03G1083700LC.1	-1	TraesCS1A03G1083700LC	c.-1280_-1279insGCCGAATT
1A	556533141	597314533	100	0	0.825	0.825	0.588	40	40	597314533	A	ATGTCGCTGGATGGG	INDEL	splice_region_variant&intron_variant	LOW	TraesCS1A03G1083800.1	3	TraesCS1A03G1083800	c.297-6_297-5insCCCATCCAGCGACA
1A	556533141	597314533	100	0	0.825	0.825	0.588	40	40	597314533	A	ATGTCGCTGGATGGG	INDEL	upstream_gene_variant	MODIFIER	TraesCS1A03G1083700LC.1	-1	TraesCS1A03G1083700LC	c.-1282_-1281insCCCATCCAGCGACA
1A	594904036	597314533	585251827	0	0.861	0.861	0.689	343	194	594904037	T	TAAG	INDEL	splice_region_variant&intron_variant	LOW	TraesCS1A03G1076200.3	11	TraesCS1A03G1076200	c.1789-3_1789-2insCTT
1A	594904036	597314533	585251827	0	0.861	0.861	0.689	343	194	594904037	T	TAAG	INDEL	splice_region_variant&intron_variant	LOW	TraesCS1A03G1076200.1	11	TraesCS1A03G1076200	c.1682-3_1682-2insCTT
1A	594904036	597314533	585251827	0	0.861	0.861	0.689	343	194	594904037	T	TAAG	INDEL	splice_region_variant&intron_variant	LOW	TraesCS1A03G1076200.2	11	TraesCS1A03G1076200	c.1774-3_1774-2insCTT
1A	594904036	597314533	585251827	0	0.861	0.861	0.689	343	194	594904037	T	TAAG	INDEL	splice_region_variant&intron_variant	LOW	TraesCS1A03G1076200.4	11	TraesCS1A03G1076200	c.*1-3_*1-2insCTT
1A	594904036	597314533	585251827	0	0.861	0.861	0.689	343	194	594904037	T	TAAG	INDEL	splice_region_variant&intron_variant	LOW	TraesCS1A03G1076200.5	11	TraesCS1A03G1076200	c.*620-3_*620-2insCTT
1A	594904036	597314533	585251827	0	0.861	0.861	0.673	316	194	594904039	A	AAAC	INDEL	splice_region_variant&intron_variant	LOW	TraesCS1A03G1076200.3	11	TraesCS1A03G1076200	c.1789-5_1789-4insGTT
1A	594904036	597314533	585251827	0	0.861	0.861	0.673	316	194	594904039	A	AAAC	INDEL	splice_region_variant&intron_variant	LOW	TraesCS1A03G1076200.1	11	TraesCS1A03G1076200	c.1682-5_1682-4insGTT
1A	594904036	597314533	585251827	0	0.861	0.861	0.673	316	194	594904039	A	AAAC	INDEL	splice_region_variant&intron_variant	LOW	TraesCS1A03G1076200.2	11	TraesCS1A03G1076200	c.1774-5_1774-4insGTT
1A	594904036	597314533	585251827	0	0.861	0.861	0.673	316	194	594904039	A	AAAC	INDEL	splice_region_variant&intron_variant	LOW	TraesCS1A03G1076200.4	11	TraesCS1A03G1076200	c.*1-5_*1-4insGTT
1A	594904036	597314533	585251827	0	0.861	0.861	0.673	316	194	594904039	A	AAAC	INDEL	splice_region_variant&intron_variant	LOW	TraesCS1A03G1076200.5	11	TraesCS1A03G1076200	c.*620-5_*620-4insGTT
1A	594904036	597314533	585251827	0	0.975	0.975	0.329	72	159	596650656	AAGGTACCACCCAGAGCCACTATGACTTGCTTTATGTTGCCTGTCAATGACAGATATTTCTCTTGCACAGCTGCTCACTAAGTACATTGTGTGTGTGTGTGTGTGTGTGTGTGTGTGTGTGTGC	A	INDEL	frameshift_variant&splice_donor_variant&splice_region_variant&intron_variant	HIGH	TraesCS1A03G1081600.1	4	TraesCS1A03G1081600	c.482_484-3del	p.Lys161fs
1A	594904036	597314533	585251827	0	0.975	0.975	0.329	72	159	596650656	AAGGTACCACCCAGAGCCACTATGACTTGCTTTATGTTGCCTGTCAATGACAGATATTTCTCTTGCACAGCTGCTCACTAAGTACATTGTGTGTGTGTGTGTGTGTGTGTGTGTGTGTGTGTGC	A	INDEL	downstream_gene_variant	MODIFIER	TraesCS1A03G1081700.1	-1	TraesCS1A03G1081700	c.*1867_*1989del
1A	594904036	597314533	585251827	0	0.946	0.946	0.437	201	296	596651008	GGGTATGTATGTGCAACATCCAACCCTTAACTAACTAACTAACCAACCAACTGATGAATCAATCAATCAATCATTCATTCATTCGTGCATAATTGAGAGCTAGCTAGAATCTCGCTTGCTGCCTCTAACTAACTAGTATTGGTATGCAACACATGATTATGGCA	G	INDEL	frameshift_variant&splice_acceptor_variant&splice_donor_variant&splice_region_variant&intron_variant	HIGH	TraesCS1A03G1081600.1	5	TraesCS1A03G1081600	c.711_712-2del	p.Val238fs
1A	594904036	597314533	585251827	0	0.946	0.946	0.437	201	296	596651008	GGGTATGTATGTGCAACATCCAACCCTTAACTAACTAACTAACCAACCAACTGATGAATCAATCAATCAATCATTCATTCATTCGTGCATAATTGAGAGCTAGCTAGAATCTCGCTTGCTGCCTCTAACTAACTAGTATTGGTATGCAACACATGATTATGGCA	G	INDEL	downstream_gene_variant	MODIFIER	TraesCS1A03G1081700.1	-1	TraesCS1A03G1081700	c.*1475_*1637del
1A	594904036	597314533	585251827	0	0.833	0.833	0.6	26	24	596868303	G	GGAGACA	INDEL	splice_donor_variant&intron_variant	HIGH	TraesCS1A03G1082000.1	1	TraesCS1A03G1082000	c.225+1_225+2insGAGACA
1A	594904036	597314533	585251827	0	0.833	0.833	0.6	26	24	596868303	G	GGAGACA	INDEL	splice_donor_variant&intron_variant	HIGH	TraesCS1A03G1082000.2	1	TraesCS1A03G1082000	c.15+1_15+2insGAGACA
1A	594904036	597314533	585251827	0	0.833	0.833	0.6	26	24	596868303	G	GGAGACA	INDEL	downstream_gene_variant	MODIFIER	TraesCS1A03G1082100.1	-1	TraesCS1A03G1082100	c.*4424_*4425insTGTCTC
1A	594904036	597314533	585251827	0	0.833	0.833	0.6	26	24	596868304	T	TGGGGCAGCCATCCCTGATATCAGAGTACGACCTGGGAGCA	INDEL	splice_region_variant&intron_variant	LOW	TraesCS1A03G1082000.1	1	TraesCS1A03G1082000	c.225+2_225+3insGGGGCAGCCATCCCTGATATCAGAGTACGACCTGGGAGCA
1A	594904036	597314533	585251827	0	0.833	0.833	0.6	26	24	596868304	T	TGGGGCAGCCATCCCTGATATCAGAGTACGACCTGGGAGCA	INDEL	splice_region_variant&intron_variant	LOW	TraesCS1A03G1082000.2	1	TraesCS1A03G1082000	c.15+2_15+3insGGGGCAGCCATCCCTGATATCAGAGTACGACCTGGGAGCA
1A	594904036	597314533	585251827	0	0.833	0.833	0.6	26	24	596868304	T	TGGGGCAGCCATCCCTGATATCAGAGTACGACCTGGGAGCA	INDEL	downstream_gene_variant	MODIFIER	TraesCS1A03G1082100.1	-1	TraesCS1A03G1082100	c.*4423_*4424insTGCTCCCAGGTCGTACTCTGATATCAGGGATGGCTGCCCC
1A	594904036	597314533	585251827	0	0.825	0.825	0.598	42	40	597314531	G	GAATTCGGC	INDEL	splice_region_variant&intron_variant	LOW	TraesCS1A03G1083800.1	3	TraesCS1A03G1083800	c.297-4_297-3insGCCGAATT
1A	594904036	597314533	585251827	0	0.825	0.825	0.598	42	40	597314531	G	GAATTCGGC	INDEL	upstream_gene_variant	MODIFIER	TraesCS1A03G1083700LC.1	-1	TraesCS1A03G1083700LC	c.-1280_-1279insGCCGAATT
1A	594904036	597314533	585251827	0	0.825	0.825	0.588	40	40	597314533	A	ATGTCGCTGGATGGG	INDEL	splice_region_variant&intron_variant	LOW	TraesCS1A03G1083800.1	3	TraesCS1A03G1083800	c.297-6_297-5insCCCATCCAGCGACA
1A	594904036	597314533	585251827	0	0.825	0.825	0.588	40	40	597314533	A	ATGTCGCTGGATGGG	INDEL	upstream_gene_variant	MODIFIER	TraesCS1A03G1083700LC.1	-1	TraesCS1A03G1083700LC	c.-1282_-1281insCCCATCCAGCGACA
1A	596868303	597314533	8267748976	0	0.833	0.833	0.6	26	24	596868304	T	TGGGGCAGCCATCCCTGATATCAGAGTACGACCTGGGAGCA	INDEL	splice_region_variant&intron_variant	LOW	TraesCS1A03G1082000.1	1	TraesCS1A03G1082000	c.225+2_225+3insGGGGCAGCCATCCCTGATATCAGAGTACGACCTGGGAGCA
1A	596868303	597314533	8267748976	0	0.833	0.833	0.6	26	24	596868304	T	TGGGGCAGCCATCCCTGATATCAGAGTACGACCTGGGAGCA	INDEL	splice_region_variant&intron_variant	LOW	TraesCS1A03G1082000.2	1	TraesCS1A03G1082000	c.15+2_15+3insGGGGCAGCCATCCCTGATATCAGAGTACGACCTGGGAGCA
1A	596868303	597314533	8267748976	0	0.833	0.833	0.6	26	24	596868304	T	TGGGGCAGCCATCCCTGATATCAGAGTACGACCTGGGAGCA	INDEL	downstream_gene_variant	MODIFIER	TraesCS1A03G1082100.1	-1	TraesCS1A03G1082100	c.*4423_*4424insTGCTCCCAGGTCGTACTCTGATATCAGGGATGGCTGCCCC
1A	596868303	597314533	8267748976	0	0.825	0.825	0.598	42	40	597314531	G	GAATTCGGC	INDEL	splice_region_variant&intron_variant	LOW	TraesCS1A03G1083800.1	3	TraesCS1A03G1083800	c.297-4_297-3insGCCGAATT
1A	596868303	597314533	8267748976	0	0.825	0.825	0.598	42	40	597314531	G	GAATTCGGC	INDEL	upstream_gene_variant	MODIFIER	TraesCS1A03G1083700LC.1	-1	TraesCS1A03G1083700LC	c.-1280_-1279insGCCGAATT
1A	596868303	597314533	8267748976	0	0.825	0.825	0.588	40	40	597314533	A	ATGTCGCTGGATGGG	INDEL	splice_region_variant&intron_variant	LOW	TraesCS1A03G1083800.1	3	TraesCS1A03G1083800	c.297-6_297-5insCCCATCCAGCGACA
1A	596868303	597314533	8267748976	0	0.825	0.825	0.588	40	40	597314533	A	ATGTCGCTGGATGGG	INDEL	upstream_gene_variant	MODIFIER	TraesCS1A03G1083700LC.1	-1	TraesCS1A03G1083700LC	c.-1282_-1281insCCCATCCAGCGACA
1B	1191173	98571767	316	0.979	0	-0.979	0.139	241	33	1191174	CGTACGTCCCTCCCTTCCCCTCCCTCCCTCCCTTTGTTCCCCTGCCAAGTCTAAGTTGCATTGCTCTGCTTTTCTTCAGAGTTGAGTTCAGGCTTGAAAAGAGATACATACATTACATAGCATAGGTAGTGGATGAACATGCATTATTATCTTCCCAAAAAGAGTATCTATCTATCTATCAATCAGTTGAATGAATTCAGTAGGTAAGAAAGAAAGAAAGAAAGAAAAGAATGAATGTGAATCTGATGTGTCATGGTTCTTCAG	C	INDEL	bidirectional_gene_fusion	HIGH	TraesCS1B03G0001600	-1	TraesCS1B03G0001600&TraesCS1B03G0001700LC	n.1191175_1191437del
1B	1191173	98571767	316	0.979	0	-0.979	0.139	241	33	1191174	CGTACGTCCCTCCCTTCCCCTCCCTCCCTCCCTTTGTTCCCCTGCCAAGTCTAAGTTGCATTGCTCTGCTTTTCTTCAGAGTTGAGTTCAGGCTTGAAAAGAGATACATACATTACATAGCATAGGTAGTGGATGAACATGCATTATTATCTTCCCAAAAAGAGTATCTATCTATCTATCAATCAGTTGAATGAATTCAGTAGGTAAGAAAGAAAGAAAGAAAGAAAAGAATGAATGTGAATCTGATGTGTCATGGTTCTTCAG	C	INDEL	frameshift_variant&stop_lost&splice_region_variant	HIGH	TraesCS1B03G0001700LC.1	2	TraesCS1B03G0001700LC	c.278_*249del	p.Pro93fs
1B	1191173	98571767	316	0.979	0	-0.979	0.139	241	33	1191174	CGTACGTCCCTCCCTTCCCCTCCCTCCCTCCCTTTGTTCCCCTGCCAAGTCTAAGTTGCATTGCTCTGCTTTTCTTCAGAGTTGAGTTCAGGCTTGAAAAGAGATACATACATTACATAGCATAGGTAGTGGATGAACATGCATTATTATCTTCCCAAAAAGAGTATCTATCTATCTATCAATCAGTTGAATGAATTCAGTAGGTAAGAAAGAAAGAAAGAAAGAAAAGAATGAATGTGAATCTGATGTGTCATGGTTCTTCAG	C	INDEL	splice_acceptor_variant&splice_donor_variant&splice_region_variant&intron_variant	HIGH	TraesCS1B03G0001600.1	1	TraesCS1B03G0001600	c.169+1_170-1del
1B	1191173	98571767	316	0.979	0	-0.979	0.139	241	33	1191174	CGTACGTCCCTCCCTTCCCCTCCCTCCCTCCCTTTGTTCCCCTGCCAAGTCTAAGTTGCATTGCTCTGCTTTTCTTCAGAGTTGAGTTCAGGCTTGAAAAGAGATACATACATTACATAGCATAGGTAGTGGATGAACATGCATTATTATCTTCCCAAAAAGAGTATCTATCTATCTATCAATCAGTTGAATGAATTCAGTAGGTAAGAAAGAAAGAAAGAAAGAAAAGAATGAATGTGAATCTGATGTGTCATGGTTCTTCAG	C	INDEL	upstream_gene_variant	MODIFIER	TraesCS1B03G0001900.1	-1	TraesCS1B03G0001900	c.-2355_-2093del
1B	1191173	98571767	316	0.979	0	-0.979	0.139	241	33	1191174	CGTACGTCCCTCCCTTCCCCTCCCTCCCTCCCTTTGTTCCCCTGCCAAGTCTAAGTTGCATTGCTCTGCTTTTCTTCAGAGTTGAGTTCAGGCTTGAAAAGAGATACATACATTACATAGCATAGGTAGTGGATGAACATGCATTATTATCTTCCCAAAAAGAGTATCTATCTATCTATCAATCAGTTGAATGAATTCAGTAGGTAAGAAAGAAAGAAAGAAAGAAAAGAATGAATGTGAATCTGATGTGTCATGGTTCTTCAG	C	INDEL	downstream_gene_variant	MODIFIER	TraesCS1B03G0001700LC.1	2	TraesCS1B03G0001700LC	c.278_*249del
1B	1191173	98571767	316	0.979	0	-0.979	0.139	241	33	1191174	CGTACGTCCCTCCCTTCCCCTCCCTCCCTCCCTTTGTTCCCCTGCCAAGTCTAAGTTGCATTGCTCTGCTTTTCTTCAGAGTTGAGTTCAGGCTTGAAAAGAGATACATACATTACATAGCATAGGTAGTGGATGAACATGCATTATTATCTTCCCAAAAAGAGTATCTATCTATCTATCAATCAGTTGAATGAATTCAGTAGGTAAGAAAGAAAGAAAGAAAGAAAAGAATGAATGTGAATCTGATGTGTCATGGTTCTTCAG	C	INDEL	downstream_gene_variant	MODIFIER	TraesCS1B03G0001800LC.1	-1	TraesCS1B03G0001800LC	c.*1859_*2121del
1B	1191173	98571767	316	0.979	0	-0.979	0.139	241	33	1191174	CGTACGTCCCTCCCTTCCCCTCCCTCCCTCCCTTTGTTCCCCTGCCAAGTCTAAGTTGCATTGCTCTGCTTTTCTTCAGAGTTGAGTTCAGGCTTGAAAAGAGATACATACATTACATAGCATAGGTAGTGGATGAACATGCATTATTATCTTCCCAAAAAGAGTATCTATCTATCTATCAATCAGTTGAATGAATTCAGTAGGTAAGAAAGAAAGAAAGAAAGAAAAGAATGAATGTGAATCTGATGTGTCATGGTTCTTCAG	C	INDEL	downstream_gene_variant	MODIFIER	TraesCS1B03G0002000.2	-1	TraesCS1B03G0002000	c.*4414_*4676del
1B	1191173	98571767	316	0.979	0	-0.979	0.139	241	33	1191174	CGTACGTCCCTCCCTTCCCCTCCCTCCCTCCCTTTGTTCCCCTGCCAAGTCTAAGTTGCATTGCTCTGCTTTTCTTCAGAGTTGAGTTCAGGCTTGAAAAGAGATACATACATTACATAGCATAGGTAGTGGATGAACATGCATTATTATCTTCCCAAAAAGAGTATCTATCTATCTATCAATCAGTTGAATGAATTCAGTAGGTAAGAAAGAAAGAAAGAAAGAAAAGAATGAATGTGAATCTGATGTGTCATGGTTCTTCAG	C	INDEL	downstream_gene_variant	MODIFIER	TraesCS1B03G0002000.1	-1	TraesCS1B03G0002000	c.*4414_*4676del
1B	1191173	98571767	316	0.979	0	-0.979	0.139	241	33	1191174	CGTACGTCCCTCCCTTCCCCTCCCTCCCTCCCTTTGTTCCCCTGCCAAGTCTAAGTTGCATTGCTCTGCTTTTCTTCAGAGTTGAGTTCAGGCTTGAAAAGAGATACATACATTACATAGCATAGGTAGTGGATGAACATGCATTATTATCTTCCCAAAAAGAGTATCTATCTATCTATCAATCAGTTGAATGAATTCAGTAGGTAAGAAAGAAAGAAAGAAAGAAAAGAATGAATGTGAATCTGATGTGTCATGGTTCTTCAG	C	INDEL	downstream_gene_variant	MODIFIER	TraesCS1B03G0002000.3	-1	TraesCS1B03G0002000	c.*4414_*4676del
1B	1191173	98571767	316	0.979	0	-0.979	0.139	241	33	1191174	CGTACGTCCCTCCCTTCCCCTCCCTCCCTCCCTTTGTTCCCCTGCCAAGTCTAAGTTGCATTGCTCTGCTTTTCTTCAGAGTTGAGTTCAGGCTTGAAAAGAGATACATACATTACATAGCATAGGTAGTGGATGAACATGCATTATTATCTTCCCAAAAAGAGTATCTATCTATCTATCAATCAGTTGAATGAATTCAGTAGGTAAGAAAGAAAGAAAGAAAGAAAAGAATGAATGTGAATCTGATGTGTCATGGTTCTTCAG	C	INDEL	downstream_gene_variant	MODIFIER	TraesCS1B03G0002000.4	-1	TraesCS1B03G0002000	c.*4414_*4676del
1B	1191173	98571767	316	0.979	0	-0.979	0.139	241	33	1191174	CGTACGTCCCTCCCTTCCCCTCCCTCCCTCCCTTTGTTCCCCTGCCAAGTCTAAGTTGCATTGCTCTGCTTTTCTTCAGAGTTGAGTTCAGGCTTGAAAAGAGATACATACATTACATAGCATAGGTAGTGGATGAACATGCATTATTATCTTCCCAAAAAGAGTATCTATCTATCTATCAATCAGTTGAATGAATTCAGTAGGTAAGAAAGAAAGAAAGAAAGAAAAGAATGAATGTGAATCTGATGTGTCATGGTTCTTCAG	C	INDEL	downstream_gene_variant	MODIFIER	TraesCS1B03G0002000.5	-1	TraesCS1B03G0002000	c.*4414_*4676del
1B	1191173	98571767	316	0.3	0.75	0.45	0.563	110	48	2382923	G	T	SNP	missense_variant	MODERATE	TraesCS1B03G0008600.1	1	TraesCS1B03G0008600	c.810C>A	p.His270Gln
1B	1191173	98571767	316	0.3	0.75	0.45	0.563	110	48	2382923	G	T	SNP	upstream_gene_variant	MODIFIER	TraesCS1B03G0008500LC.1	-1	TraesCS1B03G0008500LC	c.-2694C>A
1B	1191173	98571767	316	0.266	0.732	0.466	0.618	124	41	2383061	C	A	SNP	missense_variant	MODERATE	TraesCS1B03G0008600.1	1	TraesCS1B03G0008600	c.672G>T	p.Lys224Asn
1B	1191173	98571767	316	0.266	0.732	0.466	0.618	124	41	2383061	C	A	SNP	upstream_gene_variant	MODIFIER	TraesCS1B03G0008500LC.1	-1	TraesCS1B03G0008500LC	c.-2832G>T
1B	1191173	98571767	316	0.27	0.75	0.48	0.606	126	44	2383066	C	T	SNP	missense_variant	MODERATE	TraesCS1B03G0008600.1	1	TraesCS1B03G0008600	c.667G>A	p.Val223Ile
1B	1191173	98571767	316	0.27	0.75	0.48	0.606	126	44	2383066	C	T	SNP	upstream_gene_variant	MODIFIER	TraesCS1B03G0008500LC.1	-1	TraesCS1B03G0008500LC	c.-2837G>A
1B	1191173	98571767	316	0.27	0.727	0.457	0.612	126	44	2383067	A	C	SNP	synonymous_variant	LOW	TraesCS1B03G0008600.1	1	TraesCS1B03G0008600	c.666T>G	p.Ser222Ser
1B	1191173	98571767	316	0.27	0.727	0.457	0.612	126	44	2383067	A	C	SNP	upstream_gene_variant	MODIFIER	TraesCS1B03G0008500LC.1	-1	TraesCS1B03G0008500LC	c.-2838T>G
1B	1191173	98571767	316	0.293	0.727	0.435	0.593	123	44	2383082	G	C	SNP	missense_variant	MODERATE	TraesCS1B03G0008600.1	1	TraesCS1B03G0008600	c.651C>G	p.Asn217Lys
1B	1191173	98571767	316	0.293	0.727	0.435	0.593	123	44	2383082	G	C	SNP	upstream_gene_variant	MODIFIER	TraesCS1B03G0008500LC.1	-1	TraesCS1B03G0008500LC	c.-2853C>G
1B	1191173	98571767	316	0.294	0.871	0.577	0.552	85	31	2383602	C	G	SNP	missense_variant	MODERATE	TraesCS1B03G0008600.1	1	TraesCS1B03G0008600	c.131G>C	p.Ser44Thr
1B	1191173	98571767	316	0.294	0.871	0.577	0.552	85	31	2383602	C	G	SNP	upstream_gene_variant	MODIFIER	TraesCS1B03G0008500LC.1	-1	TraesCS1B03G0008500LC	c.-3373G>C
1B	1191173	98571767	316	0.297	0.862	0.565	0.567	91	29	2383609	G	C	SNP	missense_variant	MODERATE	TraesCS1B03G0008600.1	1	TraesCS1B03G0008600	c.124C>G	p.His42Asp
1B	1191173	98571767	316	0.297	0.862	0.565	0.567	91	29	2383609	G	C	SNP	upstream_gene_variant	MODIFIER	TraesCS1B03G0008500LC.1	-1	TraesCS1B03G0008500LC	c.-3380C>G
1B	1191173	98571767	316	1	0	-1	0.529	57	64	4533490	T	TTGTAAAACGGAATTATGTGCTGCGGATCGGTCATGTTGATGAAAGCATAGCCCACGTTGCATTTGTTCTTGAAGTC	INDEL	splice_region_variant&intron_variant	LOW	TraesCS1B03G0015900.1	13	TraesCS1B03G0015900	c.2461-3_2461-2insGACTTCAAGAACAAATGCAACGTGGGCTATGCTTTCATCAACATGACCGATCCGCAGCACATAATTCCGTTTTACA
1B	1191173	98571767	316	1	0	-1	0.529	57	64	4533490	T	TTGTAAAACGGAATTATGTGCTGCGGATCGGTCATGTTGATGAAAGCATAGCCCACGTTGCATTTGTTCTTGAAGTC	INDEL	splice_region_variant&intron_variant	LOW	TraesCS1B03G0015900.2	12	TraesCS1B03G0015900	c.2374-3_2374-2insGACTTCAAGAACAAATGCAACGTGGGCTATGCTTTCATCAACATGACCGATCCGCAGCACATAATTCCGTTTTACA
1B	1191173	98571767	316	1	0	-1	0.529	57	64	4533490	T	TTGTAAAACGGAATTATGTGCTGCGGATCGGTCATGTTGATGAAAGCATAGCCCACGTTGCATTTGTTCTTGAAGTC	INDEL	downstream_gene_variant	MODIFIER	TraesCS1B03G0015800.1	-1	TraesCS1B03G0015800	c.*3377_*3378insTGTAAAACGGAATTATGTGCTGCGGATCGGTCATGTTGATGAAAGCATAGCCCACGTTGCATTTGTTCTTGAAGTC
1B	1191173	98571767	316	0.25	0.703	0.453	0.507	32	37	4967184	G	C	SNP	missense_variant	MODERATE	TraesCS1B03G0016600.1	1	TraesCS1B03G0016600	c.1686C>G	p.Asn562Lys
1B	1191173	98571767	316	0.804	0	-0.804	0.686	46	72	18707423	G	GAGATCTCTGTCTGGACCTAGAAGAAGCTGGGTTTACGGCCGGGTTTATATGGTGAAGCAAGGGCATCCTA	INDEL	splice_donor_variant&intron_variant	HIGH	TraesCS1B03G0076300.1	6	TraesCS1B03G0076300	c.744_744+1insAGATCTCTGTCTGGACCTAGAAGAAGCTGGGTTTACGGCCGGGTTTATATGGTGAAGCAAGGGCATCCTA
1B	1191173	98571767	316	0.804	0	-0.804	0.686	46	72	18707423	G	GAGATCTCTGTCTGGACCTAGAAGAAGCTGGGTTTACGGCCGGGTTTATATGGTGAAGCAAGGGCATCCTA	INDEL	downstream_gene_variant	MODIFIER	TraesCS1B03G0076400.1	-1	TraesCS1B03G0076400	c.*2468_*2469insTAGGATGCCCTTGCTTCACCATATAAACCCGGCCGTAAACCCAGCTTCTTCTAGGTCCAGACAGAGATCT
1B	1191173	98571767	316	0	0.903	0.903	0.316	33	103	22885463	C	CCCTTGTGGGAGGCGGTGGGCATGACCATGGCGGCGGCGCCGGCGGTGGCCTCAACGTCGGGGAACATCT	INDEL	splice_acceptor_variant&intron_variant	HIGH	TraesCS1B03G0086800.1	2	TraesCS1B03G0086800	c.141-2_141-1insAGATGTTCCCCGACGTTGAGGCCACCGCCGGCGCCGCCGCCATGGTCATGCCCACCGCCTCCCACAAGG
1B	1191173	98571767	316	0	0.903	0.903	0.316	33	103	22885463	C	CCCTTGTGGGAGGCGGTGGGCATGACCATGGCGGCGGCGCCGGCGGTGGCCTCAACGTCGGGGAACATCT	INDEL	downstream_gene_variant	MODIFIER	TraesCS1B03G0086900.1	-1	TraesCS1B03G0086900	c.*4817_*4818insAGATGTTCCCCGACGTTGAGGCCACCGCCGGCGCCGCCGCCATGGTCATGCCCACCGCCTCCCACAAGG
1B	1191173	98571767	316	0.714	0.1	-0.614	0.603	28	30	26040425	A	T	SNP	upstream_gene_variant	MODIFIER	TraesCS1B03G0094900LC.1	-1	TraesCS1B03G0094900LC	c.-1390A>T
1B	1191173	98571767	316	0.714	0.1	-0.614	0.603	28	30	26040425	A	T	SNP	intergenic_region	MODIFIER	TraesCS1B03G0094800LC-TraesCS1B03G0094900LC	-1	TraesCS1B03G0094800LC-TraesCS1B03G0094900LC	n.26040425A>T
1B	1191173	98571767	316	0	0.926	0.926	0.576	64	54	41702283	G	GACCGAGCCACCCGGAGAACCGTTCTTCAAAGCAAGAGTAGGGGACGGTTGTTCCTTATTTCTGGCCGCCA	INDEL	upstream_gene_variant	MODIFIER	TraesCS1B03G0127700LC.1	-1	TraesCS1B03G0127700LC	c.-555_-554insACCGAGCCACCCGGAGAACCGTTCTTCAAAGCAAGAGTAGGGGACGGTTGTTCCTTATTTCTGGCCGCCA
1B	1191173	98571767	316	0	0.926	0.926	0.576	64	54	41702283	G	GACCGAGCCACCCGGAGAACCGTTCTTCAAAGCAAGAGTAGGGGACGGTTGTTCCTTATTTCTGGCCGCCA	INDEL	upstream_gene_variant	MODIFIER	TraesCS1B03G0127800LC.1	-1	TraesCS1B03G0127800LC	c.-1945_-1944insACCGAGCCACCCGGAGAACCGTTCTTCAAAGCAAGAGTAGGGGACGGTTGTTCCTTATTTCTGGCCGCCA
1B	1191173	98571767	316	0	0.926	0.926	0.576	64	54	41702283	G	GACCGAGCCACCCGGAGAACCGTTCTTCAAAGCAAGAGTAGGGGACGGTTGTTCCTTATTTCTGGCCGCCA	INDEL	upstream_gene_variant	MODIFIER	TraesCS1B03G0127900LC.1	-1	TraesCS1B03G0127900LC	c.-2954_-2953insACCGAGCCACCCGGAGAACCGTTCTTCAAAGCAAGAGTAGGGGACGGTTGTTCCTTATTTCTGGCCGCCA
1B	1191173	98571767	316	0	0.926	0.926	0.576	64	54	41702283	G	GACCGAGCCACCCGGAGAACCGTTCTTCAAAGCAAGAGTAGGGGACGGTTGTTCCTTATTTCTGGCCGCCA	INDEL	downstream_gene_variant	MODIFIER	TraesCS1B03G0127500LC.1	-1	TraesCS1B03G0127500LC	c.*3294_*3295insACCGAGCCACCCGGAGAACCGTTCTTCAAAGCAAGAGTAGGGGACGGTTGTTCCTTATTTCTGGCCGCCA
1B	1191173	98571767	316	0	0.926	0.926	0.576	64	54	41702283	G	GACCGAGCCACCCGGAGAACCGTTCTTCAAAGCAAGAGTAGGGGACGGTTGTTCCTTATTTCTGGCCGCCA	INDEL	downstream_gene_variant	MODIFIER	TraesCS1B03G0127600LC.1	-1	TraesCS1B03G0127600LC	c.*545_*546insACCGAGCCACCCGGAGAACCGTTCTTCAAAGCAAGAGTAGGGGACGGTTGTTCCTTATTTCTGGCCGCCA
1B	1191173	98571767	316	0	0.926	0.926	0.576	64	54	41702283	G	GACCGAGCCACCCGGAGAACCGTTCTTCAAAGCAAGAGTAGGGGACGGTTGTTCCTTATTTCTGGCCGCCA	INDEL	downstream_gene_variant	MODIFIER	TraesCS1B03G0127600LC.2	-1	TraesCS1B03G0127600LC	c.*545_*546insACCGAGCCACCCGGAGAACCGTTCTTCAAAGCAAGAGTAGGGGACGGTTGTTCCTTATTTCTGGCCGCCA
1B	1191173	98571767	316	0	0.926	0.926	0.576	64	54	41702283	G	GACCGAGCCACCCGGAGAACCGTTCTTCAAAGCAAGAGTAGGGGACGGTTGTTCCTTATTTCTGGCCGCCA	INDEL	intergenic_region	MODIFIER	TraesCS1B03G0127600LC-TraesCS1B03G0127700LC	-1	TraesCS1B03G0127600LC-TraesCS1B03G0127700LC	n.41702283_41702284insACCGAGCCACCCGGAGAACCGTTCTTCAAAGCAAGAGTAGGGGACGGTTGTTCCTTATTTCTGGCCGCCA
1B	1191173	98571767	316	0	0.703	0.703	0.675	43	37	50428592	G	GATGGATTCGTCGGCGGCCGCCTCGACGAGCTGGAACCGGGTGACGAGCGGGAGCGCCTCCGT	INDEL	splice_acceptor_variant&intron_variant	HIGH	TraesCS1B03G0147500.1	2	TraesCS1B03G0147500	c.171-1_171insACGGAGGCGCTCCCGCTCGTCACCCGGTTCCAGCTCGTCGAGGCGGCCGCCGACGAATCCAT
1B	1191173	98571767	316	0	0.703	0.703	0.675	43	37	50428592	G	GATGGATTCGTCGGCGGCCGCCTCGACGAGCTGGAACCGGGTGACGAGCGGGAGCGCCTCCGT	INDEL	downstream_gene_variant	MODIFIER	TraesCS1B03G0147400LC.1	-1	TraesCS1B03G0147400LC	c.*2708_*2709insATGGATTCGTCGGCGGCCGCCTCGACGAGCTGGAACCGGGTGACGAGCGGGAGCGCCTCCGT
1B	1191173	98571767	316	0	0.738	0.738	0.617	39	42	62922948	T	TCTTGGCGGCGAAGGCTAGGGCGTCGTCGGAGCAGTGCCGGACCCGGACCTCGCGGAGCTCCCCGGCGGCGA	INDEL	splice_region_variant&intron_variant	LOW	TraesCS1B03G0187400.1	1	TraesCS1B03G0187400	c.366-3_366-2insTCGCCGCCGGGGAGCTCCGCGAGGTCCGGGTCCGGCACTGCTCCGACGACGCCCTAGCCTTCGCCGCCAAG
1B	1191173	98571767	316	0	0.738	0.738	0.617	39	42	62922948	T	TCTTGGCGGCGAAGGCTAGGGCGTCGTCGGAGCAGTGCCGGACCCGGACCTCGCGGAGCTCCCCGGCGGCGA	INDEL	upstream_gene_variant	MODIFIER	TraesCS1B03G0187200LC.1	-1	TraesCS1B03G0187200LC	c.-4449_-4448insTCGCCGCCGGGGAGCTCCGCGAGGTCCGGGTCCGGCACTGCTCCGACGACGCCCTAGCCTTCGCCGCCAAG
1B	1191173	98571767	316	0	0.738	0.738	0.617	39	42	62922948	T	TCTTGGCGGCGAAGGCTAGGGCGTCGTCGGAGCAGTGCCGGACCCGGACCTCGCGGAGCTCCCCGGCGGCGA	INDEL	upstream_gene_variant	MODIFIER	TraesCS1B03G0187300.1	-1	TraesCS1B03G0187300	c.-2098_-2097insTCGCCGCCGGGGAGCTCCGCGAGGTCCGGGTCCGGCACTGCTCCGACGACGCCCTAGCCTTCGCCGCCAAG
1B	1191173	98571767	316	0	0.842	0.842	0.646	105	76	64185605	AGTGAGAAAATTTTCAAACCACATTTGGATCGAAGTGATACCATCAATTTATTTGGATTGTATCAAGTGCTAACTCCTCAAACAGAGAATGTCTCTGAGCCATTATGACCCATGTATTGGTATAAATTTGTACAG	A	INDEL	3_prime_UTR_truncation&exon_loss_variant&splice_region_variant	MODERATE	TraesCS1B03G0191800.1	2	TraesCS1B03G0191800	c.*1_*134del
1B	1191173	98571767	316	0	0.842	0.842	0.646	105	76	64185605	AGTGAGAAAATTTTCAAACCACATTTGGATCGAAGTGATACCATCAATTTATTTGGATTGTATCAAGTGCTAACTCCTCAAACAGAGAATGTCTCTGAGCCATTATGACCCATGTATTGGTATAAATTTGTACAG	A	INDEL	upstream_gene_variant	MODIFIER	TraesCS1B03G0191900.1	-1	TraesCS1B03G0191900	c.-1263_-1130del
1B	1191173	98571767	316	0	0.842	0.842	0.646	105	76	64185605	AGTGAGAAAATTTTCAAACCACATTTGGATCGAAGTGATACCATCAATTTATTTGGATTGTATCAAGTGCTAACTCCTCAAACAGAGAATGTCTCTGAGCCATTATGACCCATGTATTGGTATAAATTTGTACAG	A	INDEL	downstream_gene_variant	MODIFIER	TraesCS1B03G0191700LC.1	-1	TraesCS1B03G0191700LC	c.*2318_*2451del
1B	1191173	98571767	316	0	0.842	0.842	0.646	105	76	64185605	AGTGAGAAAATTTTCAAACCACATTTGGATCGAAGTGATACCATCAATTTATTTGGATTGTATCAAGTGCTAACTCCTCAAACAGAGAATGTCTCTGAGCCATTATGACCCATGTATTGGTATAAATTTGTACAG	A	INDEL	downstream_gene_variant	MODIFIER	TraesCS1B03G0191800.1	2	TraesCS1B03G0191800	c.*1_*134del
1B	1191173	98571767	316	0	0.842	0.842	0.646	105	76	64185605	AGTGAGAAAATTTTCAAACCACATTTGGATCGAAGTGATACCATCAATTTATTTGGATTGTATCAAGTGCTAACTCCTCAAACAGAGAATGTCTCTGAGCCATTATGACCCATGTATTGGTATAAATTTGTACAG	A	INDEL	intergenic_region	MODIFIER	TraesCS1B03G0191800-TraesCS1B03G0191900	-1	TraesCS1B03G0191800-TraesCS1B03G0191900	n.64185606_64185739del
1B	1191173	98571767	316	0	0.842	0.842	0.646	105	76	64185605	AGTGAGAAAATTTTCAAACCACATTTGGATCGAAGTGATACCATCAATTTATTTGGATTGTATCAAGTGCTAACTCCTCAAACAGAGAATGTCTCTGAGCCATTATGACCCATGTATTGGTATAAATTTGTACAG	A	INDEL	non_coding_transcript_variant	MODIFIER	TraesCS1B03G0191800.1	2	TraesCS1B03G0191800	c.*1_*134del
1B	1191173	98571767	316	0.731	0	-0.731	0.743	26	48	72730151	G	GAATGTGACTATTGGCTCCGT	INDEL	downstream_gene_variant	MODIFIER	TraesCS1B03G0211200.1	-1	TraesCS1B03G0211200	c.*3358_*3359insAATGTGACTATTGGCTCCGT
1B	1191173	98571767	316	0.731	0	-0.731	0.743	26	48	72730151	G	GAATGTGACTATTGGCTCCGT	INDEL	downstream_gene_variant	MODIFIER	TraesCS1B03G0211300LC.1	-1	TraesCS1B03G0211300LC	c.*1275_*1276insACGGAGCCAATAGTCACATT
1B	1191173	98571767	316	0.731	0	-0.731	0.743	26	48	72730151	G	GAATGTGACTATTGGCTCCGT	INDEL	downstream_gene_variant	MODIFIER	TraesCS1B03G0211400LC.1	-1	TraesCS1B03G0211400LC	c.*2565_*2566insACGGAGCCAATAGTCACATT
1B	1191173	98571767	316	0.731	0	-0.731	0.743	26	48	72730151	G	GAATGTGACTATTGGCTCCGT	INDEL	downstream_gene_variant	MODIFIER	TraesCS1B03G0211500LC.1	-1	TraesCS1B03G0211500LC	c.*3288_*3289insACGGAGCCAATAGTCACATT
1B	1191173	98571767	316	0.731	0	-0.731	0.743	26	48	72730151	G	GAATGTGACTATTGGCTCCGT	INDEL	downstream_gene_variant	MODIFIER	TraesCS1B03G0211200.2	-1	TraesCS1B03G0211200	c.*3358_*3359insAATGTGACTATTGGCTCCGT
1B	1191173	98571767	316	0.731	0	-0.731	0.743	26	48	72730151	G	GAATGTGACTATTGGCTCCGT	INDEL	intergenic_region	MODIFIER	TraesCS1B03G0211200-TraesCS1B03G0211300LC	-1	TraesCS1B03G0211200-TraesCS1B03G0211300LC	n.72730151_72730152insAATGTGACTATTGGCTCCGT
1B	1191173	98571767	316	0.754	0	-0.754	0.484	65	30	92917350	AAGGTTTGCTCCACATAAAATTTTATTTCTCTAATGAGATTTCTTGAACTTGTAGAAAGATGAGCACAACAATTCCCTTCACAAGTGTCTTTTTGTGCCAATGTTTTGC	A	INDEL	downstream_gene_variant	MODIFIER	TraesCS1B03G0234900LC.1	-1	TraesCS1B03G0234900LC	c.*158_*265del
1B	1191173	98571767	316	0.754	0	-0.754	0.484	65	30	92917350	AAGGTTTGCTCCACATAAAATTTTATTTCTCTAATGAGATTTCTTGAACTTGTAGAAAGATGAGCACAACAATTCCCTTCACAAGTGTCTTTTTGTGCCAATGTTTTGC	A	INDEL	intergenic_region	MODIFIER	TraesCS1B03G0234900LC-TraesCS1B03G0235000LC	-1	TraesCS1B03G0234900LC-TraesCS1B03G0235000LC	n.92917351_92917458del
1B	1191173	98571767	316	1	0.114	-0.886	0.544	22	35	98571767	G	T	SNP	upstream_gene_variant	MODIFIER	TraesCS1B03G0241800LC.1	-1	TraesCS1B03G0241800LC	c.-186G>T
1B	1191173	98571767	316	1	0.114	-0.886	0.544	22	35	98571767	G	T	SNP	downstream_gene_variant	MODIFIER	TraesCS1B03G0241900LC.1	-1	TraesCS1B03G0241900LC	c.*2253C>A
1B	1191173	98571767	316	1	0.114	-0.886	0.544	22	35	98571767	G	T	SNP	downstream_gene_variant	MODIFIER	TraesCS1B03G0242000LC.1	-1	TraesCS1B03G0242000LC	c.*2805C>A
1B	1191173	98571767	316	1	0.114	-0.886	0.544	22	35	98571767	G	T	SNP	downstream_gene_variant	MODIFIER	TraesCS1B03G0242100LC.1	-1	TraesCS1B03G0242100LC	c.*3843C>A
1B	1191173	98571767	316	1	0.114	-0.886	0.544	22	35	98571767	G	T	SNP	intergenic_region	MODIFIER	TraesCS1B03G0241700LC-TraesCS1B03G0241800LC	-1	TraesCS1B03G0241700LC-TraesCS1B03G0241800LC	n.98571767G>T
1B	2383081	113018186	92	0.293	0.727	0.435	0.593	123	44	2383082	G	C	SNP	missense_variant	MODERATE	TraesCS1B03G0008600.1	1	TraesCS1B03G0008600	c.651C>G	p.Asn217Lys
1B	2383081	113018186	92	0.293	0.727	0.435	0.593	123	44	2383082	G	C	SNP	upstream_gene_variant	MODIFIER	TraesCS1B03G0008500LC.1	-1	TraesCS1B03G0008500LC	c.-2853C>G
1B	2383081	113018186	92	0.294	0.871	0.577	0.552	85	31	2383602	C	G	SNP	missense_variant	MODERATE	TraesCS1B03G0008600.1	1	TraesCS1B03G0008600	c.131G>C	p.Ser44Thr
1B	2383081	113018186	92	0.294	0.871	0.577	0.552	85	31	2383602	C	G	SNP	upstream_gene_variant	MODIFIER	TraesCS1B03G0008500LC.1	-1	TraesCS1B03G0008500LC	c.-3373G>C
1B	2383081	113018186	92	0.297	0.862	0.565	0.567	91	29	2383609	G	C	SNP	missense_variant	MODERATE	TraesCS1B03G0008600.1	1	TraesCS1B03G0008600	c.124C>G	p.His42Asp
1B	2383081	113018186	92	0.297	0.862	0.565	0.567	91	29	2383609	G	C	SNP	upstream_gene_variant	MODIFIER	TraesCS1B03G0008500LC.1	-1	TraesCS1B03G0008500LC	c.-3380C>G
1B	2383081	113018186	92	1	0	-1	0.529	57	64	4533490	T	TTGTAAAACGGAATTATGTGCTGCGGATCGGTCATGTTGATGAAAGCATAGCCCACGTTGCATTTGTTCTTGAAGTC	INDEL	splice_region_variant&intron_variant	LOW	TraesCS1B03G0015900.1	13	TraesCS1B03G0015900	c.2461-3_2461-2insGACTTCAAGAACAAATGCAACGTGGGCTATGCTTTCATCAACATGACCGATCCGCAGCACATAATTCCGTTTTACA
1B	2383081	113018186	92	1	0	-1	0.529	57	64	4533490	T	TTGTAAAACGGAATTATGTGCTGCGGATCGGTCATGTTGATGAAAGCATAGCCCACGTTGCATTTGTTCTTGAAGTC	INDEL	splice_region_variant&intron_variant	LOW	TraesCS1B03G0015900.2	12	TraesCS1B03G0015900	c.2374-3_2374-2insGACTTCAAGAACAAATGCAACGTGGGCTATGCTTTCATCAACATGACCGATCCGCAGCACATAATTCCGTTTTACA
1B	2383081	113018186	92	1	0	-1	0.529	57	64	4533490	T	TTGTAAAACGGAATTATGTGCTGCGGATCGGTCATGTTGATGAAAGCATAGCCCACGTTGCATTTGTTCTTGAAGTC	INDEL	downstream_gene_variant	MODIFIER	TraesCS1B03G0015800.1	-1	TraesCS1B03G0015800	c.*3377_*3378insTGTAAAACGGAATTATGTGCTGCGGATCGGTCATGTTGATGAAAGCATAGCCCACGTTGCATTTGTTCTTGAAGTC
1B	2383081	113018186	92	0.25	0.703	0.453	0.507	32	37	4967184	G	C	SNP	missense_variant	MODERATE	TraesCS1B03G0016600.1	1	TraesCS1B03G0016600	c.1686C>G	p.Asn562Lys
1B	2383081	113018186	92	0.804	0	-0.804	0.686	46	72	18707423	G	GAGATCTCTGTCTGGACCTAGAAGAAGCTGGGTTTACGGCCGGGTTTATATGGTGAAGCAAGGGCATCCTA	INDEL	splice_donor_variant&intron_variant	HIGH	TraesCS1B03G0076300.1	6	TraesCS1B03G0076300	c.744_744+1insAGATCTCTGTCTGGACCTAGAAGAAGCTGGGTTTACGGCCGGGTTTATATGGTGAAGCAAGGGCATCCTA
1B	2383081	113018186	92	0.804	0	-0.804	0.686	46	72	18707423	G	GAGATCTCTGTCTGGACCTAGAAGAAGCTGGGTTTACGGCCGGGTTTATATGGTGAAGCAAGGGCATCCTA	INDEL	downstream_gene_variant	MODIFIER	TraesCS1B03G0076400.1	-1	TraesCS1B03G0076400	c.*2468_*2469insTAGGATGCCCTTGCTTCACCATATAAACCCGGCCGTAAACCCAGCTTCTTCTAGGTCCAGACAGAGATCT
1B	2383081	113018186	92	0	0.903	0.903	0.316	33	103	22885463	C	CCCTTGTGGGAGGCGGTGGGCATGACCATGGCGGCGGCGCCGGCGGTGGCCTCAACGTCGGGGAACATCT	INDEL	splice_acceptor_variant&intron_variant	HIGH	TraesCS1B03G0086800.1	2	TraesCS1B03G0086800	c.141-2_141-1insAGATGTTCCCCGACGTTGAGGCCACCGCCGGCGCCGCCGCCATGGTCATGCCCACCGCCTCCCACAAGG
1B	2383081	113018186	92	0	0.903	0.903	0.316	33	103	22885463	C	CCCTTGTGGGAGGCGGTGGGCATGACCATGGCGGCGGCGCCGGCGGTGGCCTCAACGTCGGGGAACATCT	INDEL	downstream_gene_variant	MODIFIER	TraesCS1B03G0086900.1	-1	TraesCS1B03G0086900	c.*4817_*4818insAGATGTTCCCCGACGTTGAGGCCACCGCCGGCGCCGCCGCCATGGTCATGCCCACCGCCTCCCACAAGG
1B	2383081	113018186	92	0.714	0.1	-0.614	0.603	28	30	26040425	A	T	SNP	upstream_gene_variant	MODIFIER	TraesCS1B03G0094900LC.1	-1	TraesCS1B03G0094900LC	c.-1390A>T
1B	2383081	113018186	92	0.714	0.1	-0.614	0.603	28	30	26040425	A	T	SNP	intergenic_region	MODIFIER	TraesCS1B03G0094800LC-TraesCS1B03G0094900LC	-1	TraesCS1B03G0094800LC-TraesCS1B03G0094900LC	n.26040425A>T
1B	2383081	113018186	92	0	0.926	0.926	0.576	64	54	41702283	G	GACCGAGCCACCCGGAGAACCGTTCTTCAAAGCAAGAGTAGGGGACGGTTGTTCCTTATTTCTGGCCGCCA	INDEL	upstream_gene_variant	MODIFIER	TraesCS1B03G0127700LC.1	-1	TraesCS1B03G0127700LC	c.-555_-554insACCGAGCCACCCGGAGAACCGTTCTTCAAAGCAAGAGTAGGGGACGGTTGTTCCTTATTTCTGGCCGCCA
1B	2383081	113018186	92	0	0.926	0.926	0.576	64	54	41702283	G	GACCGAGCCACCCGGAGAACCGTTCTTCAAAGCAAGAGTAGGGGACGGTTGTTCCTTATTTCTGGCCGCCA	INDEL	upstream_gene_variant	MODIFIER	TraesCS1B03G0127800LC.1	-1	TraesCS1B03G0127800LC	c.-1945_-1944insACCGAGCCACCCGGAGAACCGTTCTTCAAAGCAAGAGTAGGGGACGGTTGTTCCTTATTTCTGGCCGCCA
1B	2383081	113018186	92	0	0.926	0.926	0.576	64	54	41702283	G	GACCGAGCCACCCGGAGAACCGTTCTTCAAAGCAAGAGTAGGGGACGGTTGTTCCTTATTTCTGGCCGCCA	INDEL	upstream_gene_variant	MODIFIER	TraesCS1B03G0127900LC.1	-1	TraesCS1B03G0127900LC	c.-2954_-2953insACCGAGCCACCCGGAGAACCGTTCTTCAAAGCAAGAGTAGGGGACGGTTGTTCCTTATTTCTGGCCGCCA
1B	2383081	113018186	92	0	0.926	0.926	0.576	64	54	41702283	G	GACCGAGCCACCCGGAGAACCGTTCTTCAAAGCAAGAGTAGGGGACGGTTGTTCCTTATTTCTGGCCGCCA	INDEL	downstream_gene_variant	MODIFIER	TraesCS1B03G0127500LC.1	-1	TraesCS1B03G0127500LC	c.*3294_*3295insACCGAGCCACCCGGAGAACCGTTCTTCAAAGCAAGAGTAGGGGACGGTTGTTCCTTATTTCTGGCCGCCA
1B	2383081	113018186	92	0	0.926	0.926	0.576	64	54	41702283	G	GACCGAGCCACCCGGAGAACCGTTCTTCAAAGCAAGAGTAGGGGACGGTTGTTCCTTATTTCTGGCCGCCA	INDEL	downstream_gene_variant	MODIFIER	TraesCS1B03G0127600LC.1	-1	TraesCS1B03G0127600LC	c.*545_*546insACCGAGCCACCCGGAGAACCGTTCTTCAAAGCAAGAGTAGGGGACGGTTGTTCCTTATTTCTGGCCGCCA
1B	2383081	113018186	92	0	0.926	0.926	0.576	64	54	41702283	G	GACCGAGCCACCCGGAGAACCGTTCTTCAAAGCAAGAGTAGGGGACGGTTGTTCCTTATTTCTGGCCGCCA	INDEL	downstream_gene_variant	MODIFIER	TraesCS1B03G0127600LC.2	-1	TraesCS1B03G0127600LC	c.*545_*546insACCGAGCCACCCGGAGAACCGTTCTTCAAAGCAAGAGTAGGGGACGGTTGTTCCTTATTTCTGGCCGCCA
1B	2383081	113018186	92	0	0.926	0.926	0.576	64	54	41702283	G	GACCGAGCCACCCGGAGAACCGTTCTTCAAAGCAAGAGTAGGGGACGGTTGTTCCTTATTTCTGGCCGCCA	INDEL	intergenic_region	MODIFIER	TraesCS1B03G0127600LC-TraesCS1B03G0127700LC	-1	TraesCS1B03G0127600LC-TraesCS1B03G0127700LC	n.41702283_41702284insACCGAGCCACCCGGAGAACCGTTCTTCAAAGCAAGAGTAGGGGACGGTTGTTCCTTATTTCTGGCCGCCA
1B	2383081	113018186	92	0	0.703	0.703	0.675	43	37	50428592	G	GATGGATTCGTCGGCGGCCGCCTCGACGAGCTGGAACCGGGTGACGAGCGGGAGCGCCTCCGT	INDEL	splice_acceptor_variant&intron_variant	HIGH	TraesCS1B03G0147500.1	2	TraesCS1B03G0147500	c.171-1_171insACGGAGGCGCTCCCGCTCGTCACCCGGTTCCAGCTCGTCGAGGCGGCCGCCGACGAATCCAT
1B	2383081	113018186	92	0	0.703	0.703	0.675	43	37	50428592	G	GATGGATTCGTCGGCGGCCGCCTCGACGAGCTGGAACCGGGTGACGAGCGGGAGCGCCTCCGT	INDEL	downstream_gene_variant	MODIFIER	TraesCS1B03G0147400LC.1	-1	TraesCS1B03G0147400LC	c.*2708_*2709insATGGATTCGTCGGCGGCCGCCTCGACGAGCTGGAACCGGGTGACGAGCGGGAGCGCCTCCGT
1B	2383081	113018186	92	0	0.738	0.738	0.617	39	42	62922948	T	TCTTGGCGGCGAAGGCTAGGGCGTCGTCGGAGCAGTGCCGGACCCGGACCTCGCGGAGCTCCCCGGCGGCGA	INDEL	splice_region_variant&intron_variant	LOW	TraesCS1B03G0187400.1	1	TraesCS1B03G0187400	c.366-3_366-2insTCGCCGCCGGGGAGCTCCGCGAGGTCCGGGTCCGGCACTGCTCCGACGACGCCCTAGCCTTCGCCGCCAAG
1B	2383081	113018186	92	0	0.738	0.738	0.617	39	42	62922948	T	TCTTGGCGGCGAAGGCTAGGGCGTCGTCGGAGCAGTGCCGGACCCGGACCTCGCGGAGCTCCCCGGCGGCGA	INDEL	upstream_gene_variant	MODIFIER	TraesCS1B03G0187200LC.1	-1	TraesCS1B03G0187200LC	c.-4449_-4448insTCGCCGCCGGGGAGCTCCGCGAGGTCCGGGTCCGGCACTGCTCCGACGACGCCCTAGCCTTCGCCGCCAAG
1B	2383081	113018186	92	0	0.738	0.738	0.617	39	42	62922948	T	TCTTGGCGGCGAAGGCTAGGGCGTCGTCGGAGCAGTGCCGGACCCGGACCTCGCGGAGCTCCCCGGCGGCGA	INDEL	upstream_gene_variant	MODIFIER	TraesCS1B03G0187300.1	-1	TraesCS1B03G0187300	c.-2098_-2097insTCGCCGCCGGGGAGCTCCGCGAGGTCCGGGTCCGGCACTGCTCCGACGACGCCCTAGCCTTCGCCGCCAAG
1B	2383081	113018186	92	0	0.842	0.842	0.646	105	76	64185605	AGTGAGAAAATTTTCAAACCACATTTGGATCGAAGTGATACCATCAATTTATTTGGATTGTATCAAGTGCTAACTCCTCAAACAGAGAATGTCTCTGAGCCATTATGACCCATGTATTGGTATAAATTTGTACAG	A	INDEL	3_prime_UTR_truncation&exon_loss_variant&splice_region_variant	MODERATE	TraesCS1B03G0191800.1	2	TraesCS1B03G0191800	c.*1_*134del
1B	2383081	113018186	92	0	0.842	0.842	0.646	105	76	64185605	AGTGAGAAAATTTTCAAACCACATTTGGATCGAAGTGATACCATCAATTTATTTGGATTGTATCAAGTGCTAACTCCTCAAACAGAGAATGTCTCTGAGCCATTATGACCCATGTATTGGTATAAATTTGTACAG	A	INDEL	upstream_gene_variant	MODIFIER	TraesCS1B03G0191900.1	-1	TraesCS1B03G0191900	c.-1263_-1130del
1B	2383081	113018186	92	0	0.842	0.842	0.646	105	76	64185605	AGTGAGAAAATTTTCAAACCACATTTGGATCGAAGTGATACCATCAATTTATTTGGATTGTATCAAGTGCTAACTCCTCAAACAGAGAATGTCTCTGAGCCATTATGACCCATGTATTGGTATAAATTTGTACAG	A	INDEL	downstream_gene_variant	MODIFIER	TraesCS1B03G0191700LC.1	-1	TraesCS1B03G0191700LC	c.*2318_*2451del
1B	2383081	113018186	92	0	0.842	0.842	0.646	105	76	64185605	AGTGAGAAAATTTTCAAACCACATTTGGATCGAAGTGATACCATCAATTTATTTGGATTGTATCAAGTGCTAACTCCTCAAACAGAGAATGTCTCTGAGCCATTATGACCCATGTATTGGTATAAATTTGTACAG	A	INDEL	downstream_gene_variant	MODIFIER	TraesCS1B03G0191800.1	2	TraesCS1B03G0191800	c.*1_*134del
1B	2383081	113018186	92	0	0.842	0.842	0.646	105	76	64185605	AGTGAGAAAATTTTCAAACCACATTTGGATCGAAGTGATACCATCAATTTATTTGGATTGTATCAAGTGCTAACTCCTCAAACAGAGAATGTCTCTGAGCCATTATGACCCATGTATTGGTATAAATTTGTACAG	A	INDEL	intergenic_region	MODIFIER	TraesCS1B03G0191800-TraesCS1B03G0191900	-1	TraesCS1B03G0191800-TraesCS1B03G0191900	n.64185606_64185739del
1B	2383081	113018186	92	0	0.842	0.842	0.646	105	76	64185605	AGTGAGAAAATTTTCAAACCACATTTGGATCGAAGTGATACCATCAATTTATTTGGATTGTATCAAGTGCTAACTCCTCAAACAGAGAATGTCTCTGAGCCATTATGACCCATGTATTGGTATAAATTTGTACAG	A	INDEL	non_coding_transcript_variant	MODIFIER	TraesCS1B03G0191800.1	2	TraesCS1B03G0191800	c.*1_*134del
1B	2383081	113018186	92	0.731	0	-0.731	0.743	26	48	72730151	G	GAATGTGACTATTGGCTCCGT	INDEL	downstream_gene_variant	MODIFIER	TraesCS1B03G0211200.1	-1	TraesCS1B03G0211200	c.*3358_*3359insAATGTGACTATTGGCTCCGT
1B	2383081	113018186	92	0.731	0	-0.731	0.743	26	48	72730151	G	GAATGTGACTATTGGCTCCGT	INDEL	downstream_gene_variant	MODIFIER	TraesCS1B03G0211300LC.1	-1	TraesCS1B03G0211300LC	c.*1275_*1276insACGGAGCCAATAGTCACATT
1B	2383081	113018186	92	0.731	0	-0.731	0.743	26	48	72730151	G	GAATGTGACTATTGGCTCCGT	INDEL	downstream_gene_variant	MODIFIER	TraesCS1B03G0211400LC.1	-1	TraesCS1B03G0211400LC	c.*2565_*2566insACGGAGCCAATAGTCACATT
1B	2383081	113018186	92	0.731	0	-0.731	0.743	26	48	72730151	G	GAATGTGACTATTGGCTCCGT	INDEL	downstream_gene_variant	MODIFIER	TraesCS1B03G0211500LC.1	-1	TraesCS1B03G0211500LC	c.*3288_*3289insACGGAGCCAATAGTCACATT
1B	2383081	113018186	92	0.731	0	-0.731	0.743	26	48	72730151	G	GAATGTGACTATTGGCTCCGT	INDEL	downstream_gene_variant	MODIFIER	TraesCS1B03G0211200.2	-1	TraesCS1B03G0211200	c.*3358_*3359insAATGTGACTATTGGCTCCGT
1B	2383081	113018186	92	0.731	0	-0.731	0.743	26	48	72730151	G	GAATGTGACTATTGGCTCCGT	INDEL	intergenic_region	MODIFIER	TraesCS1B03G0211200-TraesCS1B03G0211300LC	-1	TraesCS1B03G0211200-TraesCS1B03G0211300LC	n.72730151_72730152insAATGTGACTATTGGCTCCGT
1B	2383081	113018186	92	0.754	0	-0.754	0.484	65	30	92917350	AAGGTTTGCTCCACATAAAATTTTATTTCTCTAATGAGATTTCTTGAACTTGTAGAAAGATGAGCACAACAATTCCCTTCACAAGTGTCTTTTTGTGCCAATGTTTTGC	A	INDEL	downstream_gene_variant	MODIFIER	TraesCS1B03G0234900LC.1	-1	TraesCS1B03G0234900LC	c.*158_*265del
1B	2383081	113018186	92	0.754	0	-0.754	0.484	65	30	92917350	AAGGTTTGCTCCACATAAAATTTTATTTCTCTAATGAGATTTCTTGAACTTGTAGAAAGATGAGCACAACAATTCCCTTCACAAGTGTCTTTTTGTGCCAATGTTTTGC	A	INDEL	intergenic_region	MODIFIER	TraesCS1B03G0234900LC-TraesCS1B03G0235000LC	-1	TraesCS1B03G0234900LC-TraesCS1B03G0235000LC	n.92917351_92917458del
1B	2383081	113018186	92	1	0.114	-0.886	0.544	22	35	98571767	G	T	SNP	upstream_gene_variant	MODIFIER	TraesCS1B03G0241800LC.1	-1	TraesCS1B03G0241800LC	c.-186G>T
1B	2383081	113018186	92	1	0.114	-0.886	0.544	22	35	98571767	G	T	SNP	downstream_gene_variant	MODIFIER	TraesCS1B03G0241900LC.1	-1	TraesCS1B03G0241900LC	c.*2253C>A
1B	2383081	113018186	92	1	0.114	-0.886	0.544	22	35	98571767	G	T	SNP	downstream_gene_variant	MODIFIER	TraesCS1B03G0242000LC.1	-1	TraesCS1B03G0242000LC	c.*2805C>A
1B	2383081	113018186	92	1	0.114	-0.886	0.544	22	35	98571767	G	T	SNP	downstream_gene_variant	MODIFIER	TraesCS1B03G0242100LC.1	-1	TraesCS1B03G0242100LC	c.*3843C>A
1B	2383081	113018186	92	1	0.114	-0.886	0.544	22	35	98571767	G	T	SNP	intergenic_region	MODIFIER	TraesCS1B03G0241700LC-TraesCS1B03G0241800LC	-1	TraesCS1B03G0241700LC-TraesCS1B03G0241800LC	n.98571767G>T
1B	2383081	113018186	92	0	0.857	0.857	0.474	22	35	98571768	GTTCTACTAT	G	INDEL	upstream_gene_variant	MODIFIER	TraesCS1B03G0241800LC.1	-1	TraesCS1B03G0241800LC	c.-184_-176delTTCTACTAT
1B	2383081	113018186	92	0	0.857	0.857	0.474	22	35	98571768	GTTCTACTAT	G	INDEL	downstream_gene_variant	MODIFIER	TraesCS1B03G0241900LC.1	-1	TraesCS1B03G0241900LC	c.*2243_*2251delATAGTAGAA
1B	2383081	113018186	92	0	0.857	0.857	0.474	22	35	98571768	GTTCTACTAT	G	INDEL	downstream_gene_variant	MODIFIER	TraesCS1B03G0242000LC.1	-1	TraesCS1B03G0242000LC	c.*2795_*2803delATAGTAGAA
1B	2383081	113018186	92	0	0.857	0.857	0.474	22	35	98571768	GTTCTACTAT	G	INDEL	downstream_gene_variant	MODIFIER	TraesCS1B03G0242100LC.1	-1	TraesCS1B03G0242100LC	c.*3833_*3841delATAGTAGAA
1B	2383081	113018186	92	0	0.857	0.857	0.474	22	35	98571768	GTTCTACTAT	G	INDEL	intergenic_region	MODIFIER	TraesCS1B03G0241700LC-TraesCS1B03G0241800LC	-1	TraesCS1B03G0241700LC-TraesCS1B03G0241800LC	n.98571769_98571777delTTCTACTAT
1B	2383081	113018186	92	1	0	-1	0.37	87	51	101575202	A	AG	INDEL	frameshift_variant	HIGH	TraesCS1B03G0249300.1	13	TraesCS1B03G0249300	c.1408_1409insG	p.Leu470fs
1B	2383081	113018186	92	1	0	-1	0.341	87	45	101575206	T	TCGAAGGACGAAACGAAGCTGCGGAACAGAAAGAACATTTTGATCCTAGCTCTCACTAGAC	INDEL	splice_region_variant&intron_variant	LOW	TraesCS1B03G0249300.1	13	TraesCS1B03G0249300	c.1419+3_1419+4insCGAAGGACGAAACGAAGCTGCGGAACAGAAAGAACATTTTGATCCTAGCTCTCACTAGAC
1B	2383081	113018186	92	0.896	0	-0.896	0.431	134	77	107858035	C	CGAAGAGAAGCAGATCCCCATCCTGGAAGGCAGGGATTTGGCCGAACGGGTTTCTGACGAGATGCTCAGGGCTCTTGTGCTCCATGGCCT	INDEL	splice_acceptor_variant&intron_variant	HIGH	TraesCS1B03G0260800.1	2	TraesCS1B03G0260800	c.200-2_200-1insAGGCCATGGAGCACAAGAGCCCTGAGCATCTCGTCAGAAACCCGTTCGGCCAAATCCCTGCCTTCCAGGATGGGGATCTGCTTCTCTTC
1B	2383081	113018186	92	0.974	0	-0.974	0.493	38	35	113018186	G	GAAGCCACTGAGCTGCTGCTACAGGAGTTGAATCAGATGAAGGA	INDEL	splice_donor_variant&intron_variant	HIGH	TraesCS1B03G0266000.1	1	TraesCS1B03G0266000	c.273+1_273+2insAAGCCACTGAGCTGCTGCTACAGGAGTTGAATCAGATGAAGGA
1B	18707422	163224839	45	0.804	0	-0.804	0.686	46	72	18707423	G	GAGATCTCTGTCTGGACCTAGAAGAAGCTGGGTTTACGGCCGGGTTTATATGGTGAAGCAAGGGCATCCTA	INDEL	splice_donor_variant&intron_variant	HIGH	TraesCS1B03G0076300.1	6	TraesCS1B03G0076300	c.744_744+1insAGATCTCTGTCTGGACCTAGAAGAAGCTGGGTTTACGGCCGGGTTTATATGGTGAAGCAAGGGCATCCTA
1B	18707422	163224839	45	0.804	0	-0.804	0.686	46	72	18707423	G	GAGATCTCTGTCTGGACCTAGAAGAAGCTGGGTTTACGGCCGGGTTTATATGGTGAAGCAAGGGCATCCTA	INDEL	downstream_gene_variant	MODIFIER	TraesCS1B03G0076400.1	-1	TraesCS1B03G0076400	c.*2468_*2469insTAGGATGCCCTTGCTTCACCATATAAACCCGGCCGTAAACCCAGCTTCTTCTAGGTCCAGACAGAGATCT
1B	18707422	163224839	45	0	0.903	0.903	0.316	33	103	22885463	C	CCCTTGTGGGAGGCGGTGGGCATGACCATGGCGGCGGCGCCGGCGGTGGCCTCAACGTCGGGGAACATCT	INDEL	splice_acceptor_variant&intron_variant	HIGH	TraesCS1B03G0086800.1	2	TraesCS1B03G0086800	c.141-2_141-1insAGATGTTCCCCGACGTTGAGGCCACCGCCGGCGCCGCCGCCATGGTCATGCCCACCGCCTCCCACAAGG
1B	18707422	163224839	45	0	0.903	0.903	0.316	33	103	22885463	C	CCCTTGTGGGAGGCGGTGGGCATGACCATGGCGGCGGCGCCGGCGGTGGCCTCAACGTCGGGGAACATCT	INDEL	downstream_gene_variant	MODIFIER	TraesCS1B03G0086900.1	-1	TraesCS1B03G0086900	c.*4817_*4818insAGATGTTCCCCGACGTTGAGGCCACCGCCGGCGCCGCCGCCATGGTCATGCCCACCGCCTCCCACAAGG
1B	18707422	163224839	45	0.714	0.1	-0.614	0.603	28	30	26040425	A	T	SNP	upstream_gene_variant	MODIFIER	TraesCS1B03G0094900LC.1	-1	TraesCS1B03G0094900LC	c.-1390A>T
1B	18707422	163224839	45	0.714	0.1	-0.614	0.603	28	30	26040425	A	T	SNP	intergenic_region	MODIFIER	TraesCS1B03G0094800LC-TraesCS1B03G0094900LC	-1	TraesCS1B03G0094800LC-TraesCS1B03G0094900LC	n.26040425A>T
1B	18707422	163224839	45	0	0.926	0.926	0.576	64	54	41702283	G	GACCGAGCCACCCGGAGAACCGTTCTTCAAAGCAAGAGTAGGGGACGGTTGTTCCTTATTTCTGGCCGCCA	INDEL	upstream_gene_variant	MODIFIER	TraesCS1B03G0127700LC.1	-1	TraesCS1B03G0127700LC	c.-555_-554insACCGAGCCACCCGGAGAACCGTTCTTCAAAGCAAGAGTAGGGGACGGTTGTTCCTTATTTCTGGCCGCCA
1B	18707422	163224839	45	0	0.926	0.926	0.576	64	54	41702283	G	GACCGAGCCACCCGGAGAACCGTTCTTCAAAGCAAGAGTAGGGGACGGTTGTTCCTTATTTCTGGCCGCCA	INDEL	upstream_gene_variant	MODIFIER	TraesCS1B03G0127800LC.1	-1	TraesCS1B03G0127800LC	c.-1945_-1944insACCGAGCCACCCGGAGAACCGTTCTTCAAAGCAAGAGTAGGGGACGGTTGTTCCTTATTTCTGGCCGCCA
1B	18707422	163224839	45	0	0.926	0.926	0.576	64	54	41702283	G	GACCGAGCCACCCGGAGAACCGTTCTTCAAAGCAAGAGTAGGGGACGGTTGTTCCTTATTTCTGGCCGCCA	INDEL	upstream_gene_variant	MODIFIER	TraesCS1B03G0127900LC.1	-1	TraesCS1B03G0127900LC	c.-2954_-2953insACCGAGCCACCCGGAGAACCGTTCTTCAAAGCAAGAGTAGGGGACGGTTGTTCCTTATTTCTGGCCGCCA
1B	18707422	163224839	45	0	0.926	0.926	0.576	64	54	41702283	G	GACCGAGCCACCCGGAGAACCGTTCTTCAAAGCAAGAGTAGGGGACGGTTGTTCCTTATTTCTGGCCGCCA	INDEL	downstream_gene_variant	MODIFIER	TraesCS1B03G0127500LC.1	-1	TraesCS1B03G0127500LC	c.*3294_*3295insACCGAGCCACCCGGAGAACCGTTCTTCAAAGCAAGAGTAGGGGACGGTTGTTCCTTATTTCTGGCCGCCA
1B	18707422	163224839	45	0	0.926	0.926	0.576	64	54	41702283	G	GACCGAGCCACCCGGAGAACCGTTCTTCAAAGCAAGAGTAGGGGACGGTTGTTCCTTATTTCTGGCCGCCA	INDEL	downstream_gene_variant	MODIFIER	TraesCS1B03G0127600LC.1	-1	TraesCS1B03G0127600LC	c.*545_*546insACCGAGCCACCCGGAGAACCGTTCTTCAAAGCAAGAGTAGGGGACGGTTGTTCCTTATTTCTGGCCGCCA
1B	18707422	163224839	45	0	0.926	0.926	0.576	64	54	41702283	G	GACCGAGCCACCCGGAGAACCGTTCTTCAAAGCAAGAGTAGGGGACGGTTGTTCCTTATTTCTGGCCGCCA	INDEL	downstream_gene_variant	MODIFIER	TraesCS1B03G0127600LC.2	-1	TraesCS1B03G0127600LC	c.*545_*546insACCGAGCCACCCGGAGAACCGTTCTTCAAAGCAAGAGTAGGGGACGGTTGTTCCTTATTTCTGGCCGCCA
1B	18707422	163224839	45	0	0.926	0.926	0.576	64	54	41702283	G	GACCGAGCCACCCGGAGAACCGTTCTTCAAAGCAAGAGTAGGGGACGGTTGTTCCTTATTTCTGGCCGCCA	INDEL	intergenic_region	MODIFIER	TraesCS1B03G0127600LC-TraesCS1B03G0127700LC	-1	TraesCS1B03G0127600LC-TraesCS1B03G0127700LC	n.41702283_41702284insACCGAGCCACCCGGAGAACCGTTCTTCAAAGCAAGAGTAGGGGACGGTTGTTCCTTATTTCTGGCCGCCA
1B	18707422	163224839	45	0	0.703	0.703	0.675	43	37	50428592	G	GATGGATTCGTCGGCGGCCGCCTCGACGAGCTGGAACCGGGTGACGAGCGGGAGCGCCTCCGT	INDEL	splice_acceptor_variant&intron_variant	HIGH	TraesCS1B03G0147500.1	2	TraesCS1B03G0147500	c.171-1_171insACGGAGGCGCTCCCGCTCGTCACCCGGTTCCAGCTCGTCGAGGCGGCCGCCGACGAATCCAT
1B	18707422	163224839	45	0	0.703	0.703	0.675	43	37	50428592	G	GATGGATTCGTCGGCGGCCGCCTCGACGAGCTGGAACCGGGTGACGAGCGGGAGCGCCTCCGT	INDEL	downstream_gene_variant	MODIFIER	TraesCS1B03G0147400LC.1	-1	TraesCS1B03G0147400LC	c.*2708_*2709insATGGATTCGTCGGCGGCCGCCTCGACGAGCTGGAACCGGGTGACGAGCGGGAGCGCCTCCGT
1B	18707422	163224839	45	0	0.738	0.738	0.617	39	42	62922948	T	TCTTGGCGGCGAAGGCTAGGGCGTCGTCGGAGCAGTGCCGGACCCGGACCTCGCGGAGCTCCCCGGCGGCGA	INDEL	splice_region_variant&intron_variant	LOW	TraesCS1B03G0187400.1	1	TraesCS1B03G0187400	c.366-3_366-2insTCGCCGCCGGGGAGCTCCGCGAGGTCCGGGTCCGGCACTGCTCCGACGACGCCCTAGCCTTCGCCGCCAAG
1B	18707422	163224839	45	0	0.738	0.738	0.617	39	42	62922948	T	TCTTGGCGGCGAAGGCTAGGGCGTCGTCGGAGCAGTGCCGGACCCGGACCTCGCGGAGCTCCCCGGCGGCGA	INDEL	upstream_gene_variant	MODIFIER	TraesCS1B03G0187200LC.1	-1	TraesCS1B03G0187200LC	c.-4449_-4448insTCGCCGCCGGGGAGCTCCGCGAGGTCCGGGTCCGGCACTGCTCCGACGACGCCCTAGCCTTCGCCGCCAAG
1B	18707422	163224839	45	0	0.738	0.738	0.617	39	42	62922948	T	TCTTGGCGGCGAAGGCTAGGGCGTCGTCGGAGCAGTGCCGGACCCGGACCTCGCGGAGCTCCCCGGCGGCGA	INDEL	upstream_gene_variant	MODIFIER	TraesCS1B03G0187300.1	-1	TraesCS1B03G0187300	c.-2098_-2097insTCGCCGCCGGGGAGCTCCGCGAGGTCCGGGTCCGGCACTGCTCCGACGACGCCCTAGCCTTCGCCGCCAAG
1B	18707422	163224839	45	0	0.842	0.842	0.646	105	76	64185605	AGTGAGAAAATTTTCAAACCACATTTGGATCGAAGTGATACCATCAATTTATTTGGATTGTATCAAGTGCTAACTCCTCAAACAGAGAATGTCTCTGAGCCATTATGACCCATGTATTGGTATAAATTTGTACAG	A	INDEL	3_prime_UTR_truncation&exon_loss_variant&splice_region_variant	MODERATE	TraesCS1B03G0191800.1	2	TraesCS1B03G0191800	c.*1_*134del
1B	18707422	163224839	45	0	0.842	0.842	0.646	105	76	64185605	AGTGAGAAAATTTTCAAACCACATTTGGATCGAAGTGATACCATCAATTTATTTGGATTGTATCAAGTGCTAACTCCTCAAACAGAGAATGTCTCTGAGCCATTATGACCCATGTATTGGTATAAATTTGTACAG	A	INDEL	upstream_gene_variant	MODIFIER	TraesCS1B03G0191900.1	-1	TraesCS1B03G0191900	c.-1263_-1130del
1B	18707422	163224839	45	0	0.842	0.842	0.646	105	76	64185605	AGTGAGAAAATTTTCAAACCACATTTGGATCGAAGTGATACCATCAATTTATTTGGATTGTATCAAGTGCTAACTCCTCAAACAGAGAATGTCTCTGAGCCATTATGACCCATGTATTGGTATAAATTTGTACAG	A	INDEL	downstream_gene_variant	MODIFIER	TraesCS1B03G0191700LC.1	-1	TraesCS1B03G0191700LC	c.*2318_*2451del
1B	18707422	163224839	45	0	0.842	0.842	0.646	105	76	64185605	AGTGAGAAAATTTTCAAACCACATTTGGATCGAAGTGATACCATCAATTTATTTGGATTGTATCAAGTGCTAACTCCTCAAACAGAGAATGTCTCTGAGCCATTATGACCCATGTATTGGTATAAATTTGTACAG	A	INDEL	downstream_gene_variant	MODIFIER	TraesCS1B03G0191800.1	2	TraesCS1B03G0191800	c.*1_*134del
1B	18707422	163224839	45	0	0.842	0.842	0.646	105	76	64185605	AGTGAGAAAATTTTCAAACCACATTTGGATCGAAGTGATACCATCAATTTATTTGGATTGTATCAAGTGCTAACTCCTCAAACAGAGAATGTCTCTGAGCCATTATGACCCATGTATTGGTATAAATTTGTACAG	A	INDEL	intergenic_region	MODIFIER	TraesCS1B03G0191800-TraesCS1B03G0191900	-1	TraesCS1B03G0191800-TraesCS1B03G0191900	n.64185606_64185739del
1B	18707422	163224839	45	0	0.842	0.842	0.646	105	76	64185605	AGTGAGAAAATTTTCAAACCACATTTGGATCGAAGTGATACCATCAATTTATTTGGATTGTATCAAGTGCTAACTCCTCAAACAGAGAATGTCTCTGAGCCATTATGACCCATGTATTGGTATAAATTTGTACAG	A	INDEL	non_coding_transcript_variant	MODIFIER	TraesCS1B03G0191800.1	2	TraesCS1B03G0191800	c.*1_*134del
1B	18707422	163224839	45	0.731	0	-0.731	0.743	26	48	72730151	G	GAATGTGACTATTGGCTCCGT	INDEL	downstream_gene_variant	MODIFIER	TraesCS1B03G0211200.1	-1	TraesCS1B03G0211200	c.*3358_*3359insAATGTGACTATTGGCTCCGT
1B	18707422	163224839	45	0.731	0	-0.731	0.743	26	48	72730151	G	GAATGTGACTATTGGCTCCGT	INDEL	downstream_gene_variant	MODIFIER	TraesCS1B03G0211300LC.1	-1	TraesCS1B03G0211300LC	c.*1275_*1276insACGGAGCCAATAGTCACATT
1B	18707422	163224839	45	0.731	0	-0.731	0.743	26	48	72730151	G	GAATGTGACTATTGGCTCCGT	INDEL	downstream_gene_variant	MODIFIER	TraesCS1B03G0211400LC.1	-1	TraesCS1B03G0211400LC	c.*2565_*2566insACGGAGCCAATAGTCACATT
1B	18707422	163224839	45	0.731	0	-0.731	0.743	26	48	72730151	G	GAATGTGACTATTGGCTCCGT	INDEL	downstream_gene_variant	MODIFIER	TraesCS1B03G0211500LC.1	-1	TraesCS1B03G0211500LC	c.*3288_*3289insACGGAGCCAATAGTCACATT
1B	18707422	163224839	45	0.731	0	-0.731	0.743	26	48	72730151	G	GAATGTGACTATTGGCTCCGT	INDEL	downstream_gene_variant	MODIFIER	TraesCS1B03G0211200.2	-1	TraesCS1B03G0211200	c.*3358_*3359insAATGTGACTATTGGCTCCGT
1B	18707422	163224839	45	0.731	0	-0.731	0.743	26	48	72730151	G	GAATGTGACTATTGGCTCCGT	INDEL	intergenic_region	MODIFIER	TraesCS1B03G0211200-TraesCS1B03G0211300LC	-1	TraesCS1B03G0211200-TraesCS1B03G0211300LC	n.72730151_72730152insAATGTGACTATTGGCTCCGT
1B	18707422	163224839	45	0.754	0	-0.754	0.484	65	30	92917350	AAGGTTTGCTCCACATAAAATTTTATTTCTCTAATGAGATTTCTTGAACTTGTAGAAAGATGAGCACAACAATTCCCTTCACAAGTGTCTTTTTGTGCCAATGTTTTGC	A	INDEL	downstream_gene_variant	MODIFIER	TraesCS1B03G0234900LC.1	-1	TraesCS1B03G0234900LC	c.*158_*265del
1B	18707422	163224839	45	0.754	0	-0.754	0.484	65	30	92917350	AAGGTTTGCTCCACATAAAATTTTATTTCTCTAATGAGATTTCTTGAACTTGTAGAAAGATGAGCACAACAATTCCCTTCACAAGTGTCTTTTTGTGCCAATGTTTTGC	A	INDEL	intergenic_region	MODIFIER	TraesCS1B03G0234900LC-TraesCS1B03G0235000LC	-1	TraesCS1B03G0234900LC-TraesCS1B03G0235000LC	n.92917351_92917458del
1B	18707422	163224839	45	1	0.114	-0.886	0.544	22	35	98571767	G	T	SNP	upstream_gene_variant	MODIFIER	TraesCS1B03G0241800LC.1	-1	TraesCS1B03G0241800LC	c.-186G>T
1B	18707422	163224839	45	1	0.114	-0.886	0.544	22	35	98571767	G	T	SNP	downstream_gene_variant	MODIFIER	TraesCS1B03G0241900LC.1	-1	TraesCS1B03G0241900LC	c.*2253C>A
1B	18707422	163224839	45	1	0.114	-0.886	0.544	22	35	98571767	G	T	SNP	downstream_gene_variant	MODIFIER	TraesCS1B03G0242000LC.1	-1	TraesCS1B03G0242000LC	c.*2805C>A
1B	18707422	163224839	45	1	0.114	-0.886	0.544	22	35	98571767	G	T	SNP	downstream_gene_variant	MODIFIER	TraesCS1B03G0242100LC.1	-1	TraesCS1B03G0242100LC	c.*3843C>A
1B	18707422	163224839	45	1	0.114	-0.886	0.544	22	35	98571767	G	T	SNP	intergenic_region	MODIFIER	TraesCS1B03G0241700LC-TraesCS1B03G0241800LC	-1	TraesCS1B03G0241700LC-TraesCS1B03G0241800LC	n.98571767G>T
1B	18707422	163224839	45	0	0.857	0.857	0.474	22	35	98571768	GTTCTACTAT	G	INDEL	upstream_gene_variant	MODIFIER	TraesCS1B03G0241800LC.1	-1	TraesCS1B03G0241800LC	c.-184_-176delTTCTACTAT
1B	18707422	163224839	45	0	0.857	0.857	0.474	22	35	98571768	GTTCTACTAT	G	INDEL	downstream_gene_variant	MODIFIER	TraesCS1B03G0241900LC.1	-1	TraesCS1B03G0241900LC	c.*2243_*2251delATAGTAGAA
1B	18707422	163224839	45	0	0.857	0.857	0.474	22	35	98571768	GTTCTACTAT	G	INDEL	downstream_gene_variant	MODIFIER	TraesCS1B03G0242000LC.1	-1	TraesCS1B03G0242000LC	c.*2795_*2803delATAGTAGAA
1B	18707422	163224839	45	0	0.857	0.857	0.474	22	35	98571768	GTTCTACTAT	G	INDEL	downstream_gene_variant	MODIFIER	TraesCS1B03G0242100LC.1	-1	TraesCS1B03G0242100LC	c.*3833_*3841delATAGTAGAA
1B	18707422	163224839	45	0	0.857	0.857	0.474	22	35	98571768	GTTCTACTAT	G	INDEL	intergenic_region	MODIFIER	TraesCS1B03G0241700LC-TraesCS1B03G0241800LC	-1	TraesCS1B03G0241700LC-TraesCS1B03G0241800LC	n.98571769_98571777delTTCTACTAT
1B	18707422	163224839	45	1	0	-1	0.37	87	51	101575202	A	AG	INDEL	frameshift_variant	HIGH	TraesCS1B03G0249300.1	13	TraesCS1B03G0249300	c.1408_1409insG	p.Leu470fs
1B	18707422	163224839	45	1	0	-1	0.341	87	45	101575206	T	TCGAAGGACGAAACGAAGCTGCGGAACAGAAAGAACATTTTGATCCTAGCTCTCACTAGAC	INDEL	splice_region_variant&intron_variant	LOW	TraesCS1B03G0249300.1	13	TraesCS1B03G0249300	c.1419+3_1419+4insCGAAGGACGAAACGAAGCTGCGGAACAGAAAGAACATTTTGATCCTAGCTCTCACTAGAC
1B	18707422	163224839	45	0.896	0	-0.896	0.431	134	77	107858035	C	CGAAGAGAAGCAGATCCCCATCCTGGAAGGCAGGGATTTGGCCGAACGGGTTTCTGACGAGATGCTCAGGGCTCTTGTGCTCCATGGCCT	INDEL	splice_acceptor_variant&intron_variant	HIGH	TraesCS1B03G0260800.1	2	TraesCS1B03G0260800	c.200-2_200-1insAGGCCATGGAGCACAAGAGCCCTGAGCATCTCGTCAGAAACCCGTTCGGCCAAATCCCTGCCTTCCAGGATGGGGATCTGCTTCTCTTC
1B	18707422	163224839	45	0.974	0	-0.974	0.493	38	35	113018186	G	GAAGCCACTGAGCTGCTGCTACAGGAGTTGAATCAGATGAAGGA	INDEL	splice_donor_variant&intron_variant	HIGH	TraesCS1B03G0266000.1	1	TraesCS1B03G0266000	c.273+1_273+2insAAGCCACTGAGCTGCTGCTACAGGAGTTGAATCAGATGAAGGA
1B	18707422	163224839	45	0	0.964	0.964	0.409	53	84	123181083	AAGGTCTGTCTTTCTTTGTTGGTCTTATTACATGCAATTTATTTGACGTTGCAGTTGCTTTGCTGATTAGAAAGTTGTAGCGAACACTGTTATCTCCATTGGTTCGTCTGAAGGCCAAAAGATACCCCCGCGCTGACACATTTATTTATCCATGAGC	A	INDEL	frameshift_variant&splice_donor_variant&splice_region_variant&intron_variant	HIGH	TraesCS1B03G0282900.1	10	TraesCS1B03G0282900	c.1204_1206-3del	p.Ser402fs
1B	18707422	163224839	45	0	0.72	0.72	0.684	32	25	125315833	T	TGTGCCATGCCAC	INDEL	splice_region_variant&intron_variant	LOW	TraesCS1B03G0288600.1	9	TraesCS1B03G0288600	c.751-3_751-2insGTGGCATGGCAC
1B	18707422	163224839	45	0	0.919	0.919	0.46	26	37	136739289	C	CATTGTGCTGAACAGAACAACAA	INDEL	splice_acceptor_variant&intron_variant	HIGH	TraesCS1B03G0304900.1	14	TraesCS1B03G0304900	c.1297-2_1297-1insTTGTTGTTCTGTTCAGCACAAT
1B	18707422	163224839	45	0.864	0	-0.864	0.525	44	36	150173406	T	TGCGCGGTGCAGCGTCCACATTCAGGGACAAGCTGGGGATGGAGGAGCTCGCTGGAGCAGCACC	INDEL	downstream_gene_variant	MODIFIER	TraesCS1B03G0330000LC.1	-1	TraesCS1B03G0330000LC	c.*805_*806insGCGCGGTGCAGCGTCCACATTCAGGGACAAGCTGGGGATGGAGGAGCTCGCTGGAGCAGCACC
1B	18707422	163224839	45	0.864	0	-0.864	0.525	44	36	150173406	T	TGCGCGGTGCAGCGTCCACATTCAGGGACAAGCTGGGGATGGAGGAGCTCGCTGGAGCAGCACC	INDEL	downstream_gene_variant	MODIFIER	TraesCS1B03G0330100LC.1	-1	TraesCS1B03G0330100LC	c.*3973_*3974insGGTGCTGCTCCAGCGAGCTCCTCCATCCCCAGCTTGTCCCTGAATGTGGACGCTGCACCGCGC
1B	18707422	163224839	45	0.864	0	-0.864	0.525	44	36	150173406	T	TGCGCGGTGCAGCGTCCACATTCAGGGACAAGCTGGGGATGGAGGAGCTCGCTGGAGCAGCACC	INDEL	intergenic_region	MODIFIER	TraesCS1B03G0330000LC-TraesCS1B03G0330100LC	-1	TraesCS1B03G0330000LC-TraesCS1B03G0330100LC	n.150173406_150173407insGCGCGGTGCAGCGTCCACATTCAGGGACAAGCTGGGGATGGAGGAGCTCGCTGGAGCAGCACC
1B	18707422	163224839	45	0	0.862	0.862	0.356	22	65	163224839	T	TCCATTTCATTGTTGCTGCCTGTGAAAACATGATCAGTGGGACAGGCATGAGGCCTGGCGACATTGTG	INDEL	splice_region_variant&intron_variant	LOW	TraesCS1B03G0346000.1	5	TraesCS1B03G0346000	c.1035+2_1035+3insCCATTTCATTGTTGCTGCCTGTGAAAACATGATCAGTGGGACAGGCATGAGGCCTGGCGACATTGTG
1B	18707422	163224839	45	0	0.862	0.862	0.356	22	65	163224839	T	TCCATTTCATTGTTGCTGCCTGTGAAAACATGATCAGTGGGACAGGCATGAGGCCTGGCGACATTGTG	INDEL	splice_region_variant&intron_variant	LOW	TraesCS1B03G0346000.2	5	TraesCS1B03G0346000	c.1035+2_1035+3insCCATTTCATTGTTGCTGCCTGTGAAAACATGATCAGTGGGACAGGCATGAGGCCTGGCGACATTGTG
1B	62922947	251942245	42	0	0.738	0.738	0.617	39	42	62922948	T	TCTTGGCGGCGAAGGCTAGGGCGTCGTCGGAGCAGTGCCGGACCCGGACCTCGCGGAGCTCCCCGGCGGCGA	INDEL	splice_region_variant&intron_variant	LOW	TraesCS1B03G0187400.1	1	TraesCS1B03G0187400	c.366-3_366-2insTCGCCGCCGGGGAGCTCCGCGAGGTCCGGGTCCGGCACTGCTCCGACGACGCCCTAGCCTTCGCCGCCAAG
1B	62922947	251942245	42	0	0.738	0.738	0.617	39	42	62922948	T	TCTTGGCGGCGAAGGCTAGGGCGTCGTCGGAGCAGTGCCGGACCCGGACCTCGCGGAGCTCCCCGGCGGCGA	INDEL	upstream_gene_variant	MODIFIER	TraesCS1B03G0187200LC.1	-1	TraesCS1B03G0187200LC	c.-4449_-4448insTCGCCGCCGGGGAGCTCCGCGAGGTCCGGGTCCGGCACTGCTCCGACGACGCCCTAGCCTTCGCCGCCAAG
1B	62922947	251942245	42	0	0.738	0.738	0.617	39	42	62922948	T	TCTTGGCGGCGAAGGCTAGGGCGTCGTCGGAGCAGTGCCGGACCCGGACCTCGCGGAGCTCCCCGGCGGCGA	INDEL	upstream_gene_variant	MODIFIER	TraesCS1B03G0187300.1	-1	TraesCS1B03G0187300	c.-2098_-2097insTCGCCGCCGGGGAGCTCCGCGAGGTCCGGGTCCGGCACTGCTCCGACGACGCCCTAGCCTTCGCCGCCAAG
1B	62922947	251942245	42	0	0.842	0.842	0.646	105	76	64185605	AGTGAGAAAATTTTCAAACCACATTTGGATCGAAGTGATACCATCAATTTATTTGGATTGTATCAAGTGCTAACTCCTCAAACAGAGAATGTCTCTGAGCCATTATGACCCATGTATTGGTATAAATTTGTACAG	A	INDEL	3_prime_UTR_truncation&exon_loss_variant&splice_region_variant	MODERATE	TraesCS1B03G0191800.1	2	TraesCS1B03G0191800	c.*1_*134del
1B	62922947	251942245	42	0	0.842	0.842	0.646	105	76	64185605	AGTGAGAAAATTTTCAAACCACATTTGGATCGAAGTGATACCATCAATTTATTTGGATTGTATCAAGTGCTAACTCCTCAAACAGAGAATGTCTCTGAGCCATTATGACCCATGTATTGGTATAAATTTGTACAG	A	INDEL	upstream_gene_variant	MODIFIER	TraesCS1B03G0191900.1	-1	TraesCS1B03G0191900	c.-1263_-1130del
1B	62922947	251942245	42	0	0.842	0.842	0.646	105	76	64185605	AGTGAGAAAATTTTCAAACCACATTTGGATCGAAGTGATACCATCAATTTATTTGGATTGTATCAAGTGCTAACTCCTCAAACAGAGAATGTCTCTGAGCCATTATGACCCATGTATTGGTATAAATTTGTACAG	A	INDEL	downstream_gene_variant	MODIFIER	TraesCS1B03G0191700LC.1	-1	TraesCS1B03G0191700LC	c.*2318_*2451del
1B	62922947	251942245	42	0	0.842	0.842	0.646	105	76	64185605	AGTGAGAAAATTTTCAAACCACATTTGGATCGAAGTGATACCATCAATTTATTTGGATTGTATCAAGTGCTAACTCCTCAAACAGAGAATGTCTCTGAGCCATTATGACCCATGTATTGGTATAAATTTGTACAG	A	INDEL	downstream_gene_variant	MODIFIER	TraesCS1B03G0191800.1	2	TraesCS1B03G0191800	c.*1_*134del
1B	62922947	251942245	42	0	0.842	0.842	0.646	105	76	64185605	AGTGAGAAAATTTTCAAACCACATTTGGATCGAAGTGATACCATCAATTTATTTGGATTGTATCAAGTGCTAACTCCTCAAACAGAGAATGTCTCTGAGCCATTATGACCCATGTATTGGTATAAATTTGTACAG	A	INDEL	intergenic_region	MODIFIER	TraesCS1B03G0191800-TraesCS1B03G0191900	-1	TraesCS1B03G0191800-TraesCS1B03G0191900	n.64185606_64185739del
1B	62922947	251942245	42	0	0.842	0.842	0.646	105	76	64185605	AGTGAGAAAATTTTCAAACCACATTTGGATCGAAGTGATACCATCAATTTATTTGGATTGTATCAAGTGCTAACTCCTCAAACAGAGAATGTCTCTGAGCCATTATGACCCATGTATTGGTATAAATTTGTACAG	A	INDEL	non_coding_transcript_variant	MODIFIER	TraesCS1B03G0191800.1	2	TraesCS1B03G0191800	c.*1_*134del
1B	62922947	251942245	42	0.731	0	-0.731	0.743	26	48	72730151	G	GAATGTGACTATTGGCTCCGT	INDEL	downstream_gene_variant	MODIFIER	TraesCS1B03G0211200.1	-1	TraesCS1B03G0211200	c.*3358_*3359insAATGTGACTATTGGCTCCGT
1B	62922947	251942245	42	0.731	0	-0.731	0.743	26	48	72730151	G	GAATGTGACTATTGGCTCCGT	INDEL	downstream_gene_variant	MODIFIER	TraesCS1B03G0211300LC.1	-1	TraesCS1B03G0211300LC	c.*1275_*1276insACGGAGCCAATAGTCACATT
1B	62922947	251942245	42	0.731	0	-0.731	0.743	26	48	72730151	G	GAATGTGACTATTGGCTCCGT	INDEL	downstream_gene_variant	MODIFIER	TraesCS1B03G0211400LC.1	-1	TraesCS1B03G0211400LC	c.*2565_*2566insACGGAGCCAATAGTCACATT
1B	62922947	251942245	42	0.731	0	-0.731	0.743	26	48	72730151	G	GAATGTGACTATTGGCTCCGT	INDEL	downstream_gene_variant	MODIFIER	TraesCS1B03G0211500LC.1	-1	TraesCS1B03G0211500LC	c.*3288_*3289insACGGAGCCAATAGTCACATT
1B	62922947	251942245	42	0.731	0	-0.731	0.743	26	48	72730151	G	GAATGTGACTATTGGCTCCGT	INDEL	downstream_gene_variant	MODIFIER	TraesCS1B03G0211200.2	-1	TraesCS1B03G0211200	c.*3358_*3359insAATGTGACTATTGGCTCCGT
1B	62922947	251942245	42	0.731	0	-0.731	0.743	26	48	72730151	G	GAATGTGACTATTGGCTCCGT	INDEL	intergenic_region	MODIFIER	TraesCS1B03G0211200-TraesCS1B03G0211300LC	-1	TraesCS1B03G0211200-TraesCS1B03G0211300LC	n.72730151_72730152insAATGTGACTATTGGCTCCGT
1B	62922947	251942245	42	0.754	0	-0.754	0.484	65	30	92917350	AAGGTTTGCTCCACATAAAATTTTATTTCTCTAATGAGATTTCTTGAACTTGTAGAAAGATGAGCACAACAATTCCCTTCACAAGTGTCTTTTTGTGCCAATGTTTTGC	A	INDEL	downstream_gene_variant	MODIFIER	TraesCS1B03G0234900LC.1	-1	TraesCS1B03G0234900LC	c.*158_*265del
1B	62922947	251942245	42	0.754	0	-0.754	0.484	65	30	92917350	AAGGTTTGCTCCACATAAAATTTTATTTCTCTAATGAGATTTCTTGAACTTGTAGAAAGATGAGCACAACAATTCCCTTCACAAGTGTCTTTTTGTGCCAATGTTTTGC	A	INDEL	intergenic_region	MODIFIER	TraesCS1B03G0234900LC-TraesCS1B03G0235000LC	-1	TraesCS1B03G0234900LC-TraesCS1B03G0235000LC	n.92917351_92917458del
1B	62922947	251942245	42	1	0.114	-0.886	0.544	22	35	98571767	G	T	SNP	upstream_gene_variant	MODIFIER	TraesCS1B03G0241800LC.1	-1	TraesCS1B03G0241800LC	c.-186G>T
1B	62922947	251942245	42	1	0.114	-0.886	0.544	22	35	98571767	G	T	SNP	downstream_gene_variant	MODIFIER	TraesCS1B03G0241900LC.1	-1	TraesCS1B03G0241900LC	c.*2253C>A
1B	62922947	251942245	42	1	0.114	-0.886	0.544	22	35	98571767	G	T	SNP	downstream_gene_variant	MODIFIER	TraesCS1B03G0242000LC.1	-1	TraesCS1B03G0242000LC	c.*2805C>A
1B	62922947	251942245	42	1	0.114	-0.886	0.544	22	35	98571767	G	T	SNP	downstream_gene_variant	MODIFIER	TraesCS1B03G0242100LC.1	-1	TraesCS1B03G0242100LC	c.*3843C>A
1B	62922947	251942245	42	1	0.114	-0.886	0.544	22	35	98571767	G	T	SNP	intergenic_region	MODIFIER	TraesCS1B03G0241700LC-TraesCS1B03G0241800LC	-1	TraesCS1B03G0241700LC-TraesCS1B03G0241800LC	n.98571767G>T
1B	62922947	251942245	42	0	0.857	0.857	0.474	22	35	98571768	GTTCTACTAT	G	INDEL	upstream_gene_variant	MODIFIER	TraesCS1B03G0241800LC.1	-1	TraesCS1B03G0241800LC	c.-184_-176delTTCTACTAT
1B	62922947	251942245	42	0	0.857	0.857	0.474	22	35	98571768	GTTCTACTAT	G	INDEL	downstream_gene_variant	MODIFIER	TraesCS1B03G0241900LC.1	-1	TraesCS1B03G0241900LC	c.*2243_*2251delATAGTAGAA
1B	62922947	251942245	42	0	0.857	0.857	0.474	22	35	98571768	GTTCTACTAT	G	INDEL	downstream_gene_variant	MODIFIER	TraesCS1B03G0242000LC.1	-1	TraesCS1B03G0242000LC	c.*2795_*2803delATAGTAGAA
1B	62922947	251942245	42	0	0.857	0.857	0.474	22	35	98571768	GTTCTACTAT	G	INDEL	downstream_gene_variant	MODIFIER	TraesCS1B03G0242100LC.1	-1	TraesCS1B03G0242100LC	c.*3833_*3841delATAGTAGAA
1B	62922947	251942245	42	0	0.857	0.857	0.474	22	35	98571768	GTTCTACTAT	G	INDEL	intergenic_region	MODIFIER	TraesCS1B03G0241700LC-TraesCS1B03G0241800LC	-1	TraesCS1B03G0241700LC-TraesCS1B03G0241800LC	n.98571769_98571777delTTCTACTAT
1B	62922947	251942245	42	1	0	-1	0.37	87	51	101575202	A	AG	INDEL	frameshift_variant	HIGH	TraesCS1B03G0249300.1	13	TraesCS1B03G0249300	c.1408_1409insG	p.Leu470fs
1B	62922947	251942245	42	1	0	-1	0.341	87	45	101575206	T	TCGAAGGACGAAACGAAGCTGCGGAACAGAAAGAACATTTTGATCCTAGCTCTCACTAGAC	INDEL	splice_region_variant&intron_variant	LOW	TraesCS1B03G0249300.1	13	TraesCS1B03G0249300	c.1419+3_1419+4insCGAAGGACGAAACGAAGCTGCGGAACAGAAAGAACATTTTGATCCTAGCTCTCACTAGAC
1B	62922947	251942245	42	0.896	0	-0.896	0.431	134	77	107858035	C	CGAAGAGAAGCAGATCCCCATCCTGGAAGGCAGGGATTTGGCCGAACGGGTTTCTGACGAGATGCTCAGGGCTCTTGTGCTCCATGGCCT	INDEL	splice_acceptor_variant&intron_variant	HIGH	TraesCS1B03G0260800.1	2	TraesCS1B03G0260800	c.200-2_200-1insAGGCCATGGAGCACAAGAGCCCTGAGCATCTCGTCAGAAACCCGTTCGGCCAAATCCCTGCCTTCCAGGATGGGGATCTGCTTCTCTTC
1B	62922947	251942245	42	0.974	0	-0.974	0.493	38	35	113018186	G	GAAGCCACTGAGCTGCTGCTACAGGAGTTGAATCAGATGAAGGA	INDEL	splice_donor_variant&intron_variant	HIGH	TraesCS1B03G0266000.1	1	TraesCS1B03G0266000	c.273+1_273+2insAAGCCACTGAGCTGCTGCTACAGGAGTTGAATCAGATGAAGGA
1B	62922947	251942245	42	0	0.964	0.964	0.409	53	84	123181083	AAGGTCTGTCTTTCTTTGTTGGTCTTATTACATGCAATTTATTTGACGTTGCAGTTGCTTTGCTGATTAGAAAGTTGTAGCGAACACTGTTATCTCCATTGGTTCGTCTGAAGGCCAAAAGATACCCCCGCGCTGACACATTTATTTATCCATGAGC	A	INDEL	frameshift_variant&splice_donor_variant&splice_region_variant&intron_variant	HIGH	TraesCS1B03G0282900.1	10	TraesCS1B03G0282900	c.1204_1206-3del	p.Ser402fs
1B	62922947	251942245	42	0	0.72	0.72	0.684	32	25	125315833	T	TGTGCCATGCCAC	INDEL	splice_region_variant&intron_variant	LOW	TraesCS1B03G0288600.1	9	TraesCS1B03G0288600	c.751-3_751-2insGTGGCATGGCAC
1B	62922947	251942245	42	0	0.919	0.919	0.46	26	37	136739289	C	CATTGTGCTGAACAGAACAACAA	INDEL	splice_acceptor_variant&intron_variant	HIGH	TraesCS1B03G0304900.1	14	TraesCS1B03G0304900	c.1297-2_1297-1insTTGTTGTTCTGTTCAGCACAAT
1B	62922947	251942245	42	0.864	0	-0.864	0.525	44	36	150173406	T	TGCGCGGTGCAGCGTCCACATTCAGGGACAAGCTGGGGATGGAGGAGCTCGCTGGAGCAGCACC	INDEL	downstream_gene_variant	MODIFIER	TraesCS1B03G0330000LC.1	-1	TraesCS1B03G0330000LC	c.*805_*806insGCGCGGTGCAGCGTCCACATTCAGGGACAAGCTGGGGATGGAGGAGCTCGCTGGAGCAGCACC
1B	62922947	251942245	42	0.864	0	-0.864	0.525	44	36	150173406	T	TGCGCGGTGCAGCGTCCACATTCAGGGACAAGCTGGGGATGGAGGAGCTCGCTGGAGCAGCACC	INDEL	downstream_gene_variant	MODIFIER	TraesCS1B03G0330100LC.1	-1	TraesCS1B03G0330100LC	c.*3973_*3974insGGTGCTGCTCCAGCGAGCTCCTCCATCCCCAGCTTGTCCCTGAATGTGGACGCTGCACCGCGC
1B	62922947	251942245	42	0.864	0	-0.864	0.525	44	36	150173406	T	TGCGCGGTGCAGCGTCCACATTCAGGGACAAGCTGGGGATGGAGGAGCTCGCTGGAGCAGCACC	INDEL	intergenic_region	MODIFIER	TraesCS1B03G0330000LC-TraesCS1B03G0330100LC	-1	TraesCS1B03G0330000LC-TraesCS1B03G0330100LC	n.150173406_150173407insGCGCGGTGCAGCGTCCACATTCAGGGACAAGCTGGGGATGGAGGAGCTCGCTGGAGCAGCACC
1B	62922947	251942245	42	0	0.862	0.862	0.356	22	65	163224839	T	TCCATTTCATTGTTGCTGCCTGTGAAAACATGATCAGTGGGACAGGCATGAGGCCTGGCGACATTGTG	INDEL	splice_region_variant&intron_variant	LOW	TraesCS1B03G0346000.1	5	TraesCS1B03G0346000	c.1035+2_1035+3insCCATTTCATTGTTGCTGCCTGTGAAAACATGATCAGTGGGACAGGCATGAGGCCTGGCGACATTGTG
1B	62922947	251942245	42	0	0.862	0.862	0.356	22	65	163224839	T	TCCATTTCATTGTTGCTGCCTGTGAAAACATGATCAGTGGGACAGGCATGAGGCCTGGCGACATTGTG	INDEL	splice_region_variant&intron_variant	LOW	TraesCS1B03G0346000.2	5	TraesCS1B03G0346000	c.1035+2_1035+3insCCATTTCATTGTTGCTGCCTGTGAAAACATGATCAGTGGGACAGGCATGAGGCCTGGCGACATTGTG
1B	62922947	251942245	42	0.766	0	-0.766	0.404	77	22	165944136	CCCTGCAAATCATTCAAACTGTCAACCTGAGCTTTTTTGTTTAGCAGCAATGCACATAGCCGTTATAGTTCATACACAGGCAAACAGTCTGAGCTGTGAACTATGAACTGTA	C	INDEL	frameshift_variant&splice_acceptor_variant&splice_donor_variant&splice_region_variant&intron_variant	HIGH	TraesCS1B03G0350000LC.1	5	TraesCS1B03G0350000LC	c.309+2_310del	p.Gly104fs
1B	62922947	251942245	42	0.766	0	-0.766	0.404	77	22	165944136	CCCTGCAAATCATTCAAACTGTCAACCTGAGCTTTTTTGTTTAGCAGCAATGCACATAGCCGTTATAGTTCATACACAGGCAAACAGTCTGAGCTGTGAACTATGAACTGTA	C	INDEL	upstream_gene_variant	MODIFIER	TraesCS1B03G0349800LC.1	-1	TraesCS1B03G0349800LC	c.-2655_-2545del
1B	62922947	251942245	42	0.766	0	-0.766	0.404	77	22	165944136	CCCTGCAAATCATTCAAACTGTCAACCTGAGCTTTTTTGTTTAGCAGCAATGCACATAGCCGTTATAGTTCATACACAGGCAAACAGTCTGAGCTGTGAACTATGAACTGTA	C	INDEL	upstream_gene_variant	MODIFIER	TraesCS1B03G0349900LC.1	-1	TraesCS1B03G0349900LC	c.-2235_-2125del
1B	62922947	251942245	42	0.766	0	-0.766	0.404	77	22	165944136	CCCTGCAAATCATTCAAACTGTCAACCTGAGCTTTTTTGTTTAGCAGCAATGCACATAGCCGTTATAGTTCATACACAGGCAAACAGTCTGAGCTGTGAACTATGAACTGTA	C	INDEL	downstream_gene_variant	MODIFIER	TraesCS1B03G0349700LC.1	-1	TraesCS1B03G0349700LC	c.*3985_*4095del
1B	62922947	251942245	42	0	0.794	0.794	0.587	58	63	172362285	AACCTGGTAACCACAAGTAGAAGTGATGCTTCAAGTACCAGTGCCCTATTCAAGCGAAGGCATTGGAGCGACAAAAAAGGGGGTGCTAAAAGGGAACATGTAAATTTTCTAACATCTTTTTTGCAGCTAAAATATTTCTGTACCTTGAATTGCTAGATGATAATGTAGGCTTGGTATAAAAAATTCAAAAGATACGTCCACCGAAACACACACAT	A	INDEL	frameshift_variant&splice_acceptor_variant&splice_region_variant&intron_variant	HIGH	TraesCS1B03G0359400.1	7	TraesCS1B03G0359400	c.501+3_503del	p.Val168fs
1B	62922947	251942245	42	0	0.794	0.794	0.587	58	63	172362285	AACCTGGTAACCACAAGTAGAAGTGATGCTTCAAGTACCAGTGCCCTATTCAAGCGAAGGCATTGGAGCGACAAAAAAGGGGGTGCTAAAAGGGAACATGTAAATTTTCTAACATCTTTTTTGCAGCTAAAATATTTCTGTACCTTGAATTGCTAGATGATAATGTAGGCTTGGTATAAAAAATTCAAAAGATACGTCCACCGAAACACACACAT	A	INDEL	upstream_gene_variant	MODIFIER	TraesCS1B03G0359300LC.1	-1	TraesCS1B03G0359300LC	c.-3127_-2914del
1B	62922947	251942245	42	0	0.933	0.933	0.517	28	30	184988869	T	TATTTGCTGTATCTGCCTAGCAAGATACTCGAACAATGATGATCTCC	INDEL	splice_donor_variant&intron_variant	HIGH	TraesCS1B03G0374900.1	6	TraesCS1B03G0374900	c.1035_1035+1insATTTGCTGTATCTGCCTAGCAAGATACTCGAACAATGATGATCTCC
1B	62922947	251942245	42	0.76	0	-0.76	0.648	25	29	210833345	G	GGTAAATCGTTCTCCAGAAGTTTCCAGTCATGCTGAATTCTTTTTGTCCACTCTTTCCCTGTCTTTC	INDEL	splice_region_variant&intron_variant	LOW	TraesCS1B03G0401800.2	4	TraesCS1B03G0401800	c.755-4_755-3insGAAAGACAGGGAAAGAGTGGACAAAAAGAATTCAGCATGACTGGAAACTTCTGGAGAACGATTTAC
1B	62922947	251942245	42	0.76	0	-0.76	0.648	25	29	210833345	G	GGTAAATCGTTCTCCAGAAGTTTCCAGTCATGCTGAATTCTTTTTGTCCACTCTTTCCCTGTCTTTC	INDEL	splice_region_variant&intron_variant	LOW	TraesCS1B03G0401800.1	3	TraesCS1B03G0401800	c.683-4_683-3insGAAAGACAGGGAAAGAGTGGACAAAAAGAATTCAGCATGACTGGAAACTTCTGGAGAACGATTTAC
1B	62922947	251942245	42	0.76	0	-0.76	0.648	25	29	210833345	G	GGTAAATCGTTCTCCAGAAGTTTCCAGTCATGCTGAATTCTTTTTGTCCACTCTTTCCCTGTCTTTC	INDEL	downstream_gene_variant	MODIFIER	TraesCS1B03G0401900LC.1	-1	TraesCS1B03G0401900LC	c.*236_*237insGAAAGACAGGGAAAGAGTGGACAAAAAGAATTCAGCATGACTGGAAACTTCTGGAGAACGATTTAC
1B	62922947	251942245	42	0.941	0	-0.941	0.538	51	53	251942245	C	CA	INDEL	splice_acceptor_variant&intron_variant	HIGH	TraesCS1B03G0435100.2	5	TraesCS1B03G0435100	c.763-2_763-1insT
1B	62922947	251942245	42	0.941	0	-0.941	0.538	51	53	251942245	C	CA	INDEL	splice_acceptor_variant&intron_variant	HIGH	TraesCS1B03G0435100.1	3	TraesCS1B03G0435100	c.436-2_436-1insT
1B	98571767	288584626	23	0	0.857	0.857	0.474	22	35	98571768	GTTCTACTAT	G	INDEL	upstream_gene_variant	MODIFIER	TraesCS1B03G0241800LC.1	-1	TraesCS1B03G0241800LC	c.-184_-176delTTCTACTAT
1B	98571767	288584626	23	0	0.857	0.857	0.474	22	35	98571768	GTTCTACTAT	G	INDEL	downstream_gene_variant	MODIFIER	TraesCS1B03G0241900LC.1	-1	TraesCS1B03G0241900LC	c.*2243_*2251delATAGTAGAA
1B	98571767	288584626	23	0	0.857	0.857	0.474	22	35	98571768	GTTCTACTAT	G	INDEL	downstream_gene_variant	MODIFIER	TraesCS1B03G0242000LC.1	-1	TraesCS1B03G0242000LC	c.*2795_*2803delATAGTAGAA
1B	98571767	288584626	23	0	0.857	0.857	0.474	22	35	98571768	GTTCTACTAT	G	INDEL	downstream_gene_variant	MODIFIER	TraesCS1B03G0242100LC.1	-1	TraesCS1B03G0242100LC	c.*3833_*3841delATAGTAGAA
1B	98571767	288584626	23	0	0.857	0.857	0.474	22	35	98571768	GTTCTACTAT	G	INDEL	intergenic_region	MODIFIER	TraesCS1B03G0241700LC-TraesCS1B03G0241800LC	-1	TraesCS1B03G0241700LC-TraesCS1B03G0241800LC	n.98571769_98571777delTTCTACTAT
1B	98571767	288584626	23	1	0	-1	0.37	87	51	101575202	A	AG	INDEL	frameshift_variant	HIGH	TraesCS1B03G0249300.1	13	TraesCS1B03G0249300	c.1408_1409insG	p.Leu470fs
1B	98571767	288584626	23	1	0	-1	0.341	87	45	101575206	T	TCGAAGGACGAAACGAAGCTGCGGAACAGAAAGAACATTTTGATCCTAGCTCTCACTAGAC	INDEL	splice_region_variant&intron_variant	LOW	TraesCS1B03G0249300.1	13	TraesCS1B03G0249300	c.1419+3_1419+4insCGAAGGACGAAACGAAGCTGCGGAACAGAAAGAACATTTTGATCCTAGCTCTCACTAGAC
1B	98571767	288584626	23	0.896	0	-0.896	0.431	134	77	107858035	C	CGAAGAGAAGCAGATCCCCATCCTGGAAGGCAGGGATTTGGCCGAACGGGTTTCTGACGAGATGCTCAGGGCTCTTGTGCTCCATGGCCT	INDEL	splice_acceptor_variant&intron_variant	HIGH	TraesCS1B03G0260800.1	2	TraesCS1B03G0260800	c.200-2_200-1insAGGCCATGGAGCACAAGAGCCCTGAGCATCTCGTCAGAAACCCGTTCGGCCAAATCCCTGCCTTCCAGGATGGGGATCTGCTTCTCTTC
1B	98571767	288584626	23	0.974	0	-0.974	0.493	38	35	113018186	G	GAAGCCACTGAGCTGCTGCTACAGGAGTTGAATCAGATGAAGGA	INDEL	splice_donor_variant&intron_variant	HIGH	TraesCS1B03G0266000.1	1	TraesCS1B03G0266000	c.273+1_273+2insAAGCCACTGAGCTGCTGCTACAGGAGTTGAATCAGATGAAGGA
1B	98571767	288584626	23	0	0.964	0.964	0.409	53	84	123181083	AAGGTCTGTCTTTCTTTGTTGGTCTTATTACATGCAATTTATTTGACGTTGCAGTTGCTTTGCTGATTAGAAAGTTGTAGCGAACACTGTTATCTCCATTGGTTCGTCTGAAGGCCAAAAGATACCCCCGCGCTGACACATTTATTTATCCATGAGC	A	INDEL	frameshift_variant&splice_donor_variant&splice_region_variant&intron_variant	HIGH	TraesCS1B03G0282900.1	10	TraesCS1B03G0282900	c.1204_1206-3del	p.Ser402fs
1B	98571767	288584626	23	0	0.72	0.72	0.684	32	25	125315833	T	TGTGCCATGCCAC	INDEL	splice_region_variant&intron_variant	LOW	TraesCS1B03G0288600.1	9	TraesCS1B03G0288600	c.751-3_751-2insGTGGCATGGCAC
1B	98571767	288584626	23	0	0.919	0.919	0.46	26	37	136739289	C	CATTGTGCTGAACAGAACAACAA	INDEL	splice_acceptor_variant&intron_variant	HIGH	TraesCS1B03G0304900.1	14	TraesCS1B03G0304900	c.1297-2_1297-1insTTGTTGTTCTGTTCAGCACAAT
1B	98571767	288584626	23	0.864	0	-0.864	0.525	44	36	150173406	T	TGCGCGGTGCAGCGTCCACATTCAGGGACAAGCTGGGGATGGAGGAGCTCGCTGGAGCAGCACC	INDEL	downstream_gene_variant	MODIFIER	TraesCS1B03G0330000LC.1	-1	TraesCS1B03G0330000LC	c.*805_*806insGCGCGGTGCAGCGTCCACATTCAGGGACAAGCTGGGGATGGAGGAGCTCGCTGGAGCAGCACC
1B	98571767	288584626	23	0.864	0	-0.864	0.525	44	36	150173406	T	TGCGCGGTGCAGCGTCCACATTCAGGGACAAGCTGGGGATGGAGGAGCTCGCTGGAGCAGCACC	INDEL	downstream_gene_variant	MODIFIER	TraesCS1B03G0330100LC.1	-1	TraesCS1B03G0330100LC	c.*3973_*3974insGGTGCTGCTCCAGCGAGCTCCTCCATCCCCAGCTTGTCCCTGAATGTGGACGCTGCACCGCGC
1B	98571767	288584626	23	0.864	0	-0.864	0.525	44	36	150173406	T	TGCGCGGTGCAGCGTCCACATTCAGGGACAAGCTGGGGATGGAGGAGCTCGCTGGAGCAGCACC	INDEL	intergenic_region	MODIFIER	TraesCS1B03G0330000LC-TraesCS1B03G0330100LC	-1	TraesCS1B03G0330000LC-TraesCS1B03G0330100LC	n.150173406_150173407insGCGCGGTGCAGCGTCCACATTCAGGGACAAGCTGGGGATGGAGGAGCTCGCTGGAGCAGCACC
1B	98571767	288584626	23	0	0.862	0.862	0.356	22	65	163224839	T	TCCATTTCATTGTTGCTGCCTGTGAAAACATGATCAGTGGGACAGGCATGAGGCCTGGCGACATTGTG	INDEL	splice_region_variant&intron_variant	LOW	TraesCS1B03G0346000.1	5	TraesCS1B03G0346000	c.1035+2_1035+3insCCATTTCATTGTTGCTGCCTGTGAAAACATGATCAGTGGGACAGGCATGAGGCCTGGCGACATTGTG
1B	98571767	288584626	23	0	0.862	0.862	0.356	22	65	163224839	T	TCCATTTCATTGTTGCTGCCTGTGAAAACATGATCAGTGGGACAGGCATGAGGCCTGGCGACATTGTG	INDEL	splice_region_variant&intron_variant	LOW	TraesCS1B03G0346000.2	5	TraesCS1B03G0346000	c.1035+2_1035+3insCCATTTCATTGTTGCTGCCTGTGAAAACATGATCAGTGGGACAGGCATGAGGCCTGGCGACATTGTG
1B	98571767	288584626	23	0.766	0	-0.766	0.404	77	22	165944136	CCCTGCAAATCATTCAAACTGTCAACCTGAGCTTTTTTGTTTAGCAGCAATGCACATAGCCGTTATAGTTCATACACAGGCAAACAGTCTGAGCTGTGAACTATGAACTGTA	C	INDEL	frameshift_variant&splice_acceptor_variant&splice_donor_variant&splice_region_variant&intron_variant	HIGH	TraesCS1B03G0350000LC.1	5	TraesCS1B03G0350000LC	c.309+2_310del	p.Gly104fs
1B	98571767	288584626	23	0.766	0	-0.766	0.404	77	22	165944136	CCCTGCAAATCATTCAAACTGTCAACCTGAGCTTTTTTGTTTAGCAGCAATGCACATAGCCGTTATAGTTCATACACAGGCAAACAGTCTGAGCTGTGAACTATGAACTGTA	C	INDEL	upstream_gene_variant	MODIFIER	TraesCS1B03G0349800LC.1	-1	TraesCS1B03G0349800LC	c.-2655_-2545del
1B	98571767	288584626	23	0.766	0	-0.766	0.404	77	22	165944136	CCCTGCAAATCATTCAAACTGTCAACCTGAGCTTTTTTGTTTAGCAGCAATGCACATAGCCGTTATAGTTCATACACAGGCAAACAGTCTGAGCTGTGAACTATGAACTGTA	C	INDEL	upstream_gene_variant	MODIFIER	TraesCS1B03G0349900LC.1	-1	TraesCS1B03G0349900LC	c.-2235_-2125del
1B	98571767	288584626	23	0.766	0	-0.766	0.404	77	22	165944136	CCCTGCAAATCATTCAAACTGTCAACCTGAGCTTTTTTGTTTAGCAGCAATGCACATAGCCGTTATAGTTCATACACAGGCAAACAGTCTGAGCTGTGAACTATGAACTGTA	C	INDEL	downstream_gene_variant	MODIFIER	TraesCS1B03G0349700LC.1	-1	TraesCS1B03G0349700LC	c.*3985_*4095del
1B	98571767	288584626	23	0	0.794	0.794	0.587	58	63	172362285	AACCTGGTAACCACAAGTAGAAGTGATGCTTCAAGTACCAGTGCCCTATTCAAGCGAAGGCATTGGAGCGACAAAAAAGGGGGTGCTAAAAGGGAACATGTAAATTTTCTAACATCTTTTTTGCAGCTAAAATATTTCTGTACCTTGAATTGCTAGATGATAATGTAGGCTTGGTATAAAAAATTCAAAAGATACGTCCACCGAAACACACACAT	A	INDEL	frameshift_variant&splice_acceptor_variant&splice_region_variant&intron_variant	HIGH	TraesCS1B03G0359400.1	7	TraesCS1B03G0359400	c.501+3_503del	p.Val168fs
1B	98571767	288584626	23	0	0.794	0.794	0.587	58	63	172362285	AACCTGGTAACCACAAGTAGAAGTGATGCTTCAAGTACCAGTGCCCTATTCAAGCGAAGGCATTGGAGCGACAAAAAAGGGGGTGCTAAAAGGGAACATGTAAATTTTCTAACATCTTTTTTGCAGCTAAAATATTTCTGTACCTTGAATTGCTAGATGATAATGTAGGCTTGGTATAAAAAATTCAAAAGATACGTCCACCGAAACACACACAT	A	INDEL	upstream_gene_variant	MODIFIER	TraesCS1B03G0359300LC.1	-1	TraesCS1B03G0359300LC	c.-3127_-2914del
1B	98571767	288584626	23	0	0.933	0.933	0.517	28	30	184988869	T	TATTTGCTGTATCTGCCTAGCAAGATACTCGAACAATGATGATCTCC	INDEL	splice_donor_variant&intron_variant	HIGH	TraesCS1B03G0374900.1	6	TraesCS1B03G0374900	c.1035_1035+1insATTTGCTGTATCTGCCTAGCAAGATACTCGAACAATGATGATCTCC
1B	98571767	288584626	23	0.76	0	-0.76	0.648	25	29	210833345	G	GGTAAATCGTTCTCCAGAAGTTTCCAGTCATGCTGAATTCTTTTTGTCCACTCTTTCCCTGTCTTTC	INDEL	splice_region_variant&intron_variant	LOW	TraesCS1B03G0401800.2	4	TraesCS1B03G0401800	c.755-4_755-3insGAAAGACAGGGAAAGAGTGGACAAAAAGAATTCAGCATGACTGGAAACTTCTGGAGAACGATTTAC
1B	98571767	288584626	23	0.76	0	-0.76	0.648	25	29	210833345	G	GGTAAATCGTTCTCCAGAAGTTTCCAGTCATGCTGAATTCTTTTTGTCCACTCTTTCCCTGTCTTTC	INDEL	splice_region_variant&intron_variant	LOW	TraesCS1B03G0401800.1	3	TraesCS1B03G0401800	c.683-4_683-3insGAAAGACAGGGAAAGAGTGGACAAAAAGAATTCAGCATGACTGGAAACTTCTGGAGAACGATTTAC
1B	98571767	288584626	23	0.76	0	-0.76	0.648	25	29	210833345	G	GGTAAATCGTTCTCCAGAAGTTTCCAGTCATGCTGAATTCTTTTTGTCCACTCTTTCCCTGTCTTTC	INDEL	downstream_gene_variant	MODIFIER	TraesCS1B03G0401900LC.1	-1	TraesCS1B03G0401900LC	c.*236_*237insGAAAGACAGGGAAAGAGTGGACAAAAAGAATTCAGCATGACTGGAAACTTCTGGAGAACGATTTAC
1B	98571767	288584626	23	0.941	0	-0.941	0.538	51	53	251942245	C	CA	INDEL	splice_acceptor_variant&intron_variant	HIGH	TraesCS1B03G0435100.2	5	TraesCS1B03G0435100	c.763-2_763-1insT
1B	98571767	288584626	23	0.941	0	-0.941	0.538	51	53	251942245	C	CA	INDEL	splice_acceptor_variant&intron_variant	HIGH	TraesCS1B03G0435100.1	3	TraesCS1B03G0435100	c.436-2_436-1insT
1B	98571767	288584626	23	0	1	1	0.533	32	28	261597163	C	CCTTCAA	INDEL	splice_acceptor_variant&intron_variant	HIGH	TraesCS1B03G0442700.1	13	TraesCS1B03G0442700	c.2356-1_2356insTTGAAG
1B	98571767	288584626	23	0	1	1	0.533	32	28	261597163	C	CCTTCAA	INDEL	downstream_gene_variant	MODIFIER	TraesCS1B03G0442600LC.1	-1	TraesCS1B03G0442600LC	c.*4183_*4184insCTTCAA
1B	98571767	288584626	23	0	1	1	0.533	32	28	261597163	C	CCTTCAA	INDEL	intron_variant	MODIFIER	TraesCS1B03G0442700.2	13	TraesCS1B03G0442700	c.2356-17_2356-16insTTGAAG
1B	98571767	288584626	23	0	1	1	0.533	32	28	261597163	C	CCTTCAA	INDEL	intron_variant	MODIFIER	TraesCS1B03G0442700.3	13	TraesCS1B03G0442700	c.2356-60_2356-59insTTGAAG
1B	98571767	288584626	23	0.868	0	-0.868	0.582	38	41	266126542	G	GAGGGCAGTAGCTCACACTGTGAGGGGCTTCAGCAACGGGGCCTATTATGCACATGATGGTGTGA	INDEL	splice_donor_variant&intron_variant	HIGH	TraesCS1B03G0447500LC.1	11	TraesCS1B03G0447500LC	c.1064+1_1064+2insAGGGCAGTAGCTCACACTGTGAGGGGCTTCAGCAACGGGGCCTATTATGCACATGATGGTGTGA
1B	98571767	288584626	23	0.868	0	-0.868	0.582	38	41	266126542	G	GAGGGCAGTAGCTCACACTGTGAGGGGCTTCAGCAACGGGGCCTATTATGCACATGATGGTGTGA	INDEL	downstream_gene_variant	MODIFIER	TraesCS1B03G0447600LC.1	-1	TraesCS1B03G0447600LC	c.*633_*634insAGGGCAGTAGCTCACACTGTGAGGGGCTTCAGCAACGGGGCCTATTATGCACATGATGGTGTGA
1B	98571767	288584626	23	0.955	0	-0.955	0.58	22	28	270885692	C	CATAAAGGTTGCCGTAATCATCT	INDEL	splice_acceptor_variant&intron_variant	HIGH	TraesCS1B03G0453000.2	12	TraesCS1B03G0453000	c.1915-2_1915-1insAGATGATTACGGCAACCTTTAT
1B	98571767	288584626	23	0.955	0	-0.955	0.58	22	28	270885692	C	CATAAAGGTTGCCGTAATCATCT	INDEL	splice_acceptor_variant&intron_variant	HIGH	TraesCS1B03G0453000.1	13	TraesCS1B03G0453000	c.1879-2_1879-1insAGATGATTACGGCAACCTTTAT
1B	98571767	288584626	23	0	0.952	0.952	0.54	45	42	288578615	C	CATTCTTACGCTGGATGTGATTGAACTCATCCTCATTCAAGACACGGCGTGGTGATCCATCATCAA	INDEL	splice_acceptor_variant&intron_variant	HIGH	TraesCS1B03G0477200.1	4	TraesCS1B03G0477200	c.433-1_433insTTGATGATGGATCACCACGCCGTGTCTTGAATGAGGATGAGTTCAATCACATCCAGCGTAAGAAT
1B	98571767	288584626	23	0	0.952	0.952	0.54	45	42	288578615	C	CATTCTTACGCTGGATGTGATTGAACTCATCCTCATTCAAGACACGGCGTGGTGATCCATCATCAA	INDEL	splice_acceptor_variant&intron_variant	HIGH	TraesCS1B03G0477200.2	4	TraesCS1B03G0477200	c.433-1_433insTTGATGATGGATCACCACGCCGTGTCTTGAATGAGGATGAGTTCAATCACATCCAGCGTAAGAAT
1B	98571767	288584626	23	0	0.979	0.979	0.586	64	47	288584626	TCTGTTGCATAAGAAGCACAACACAACACACCAATTCAAAAAAAGAAACAATTTTCTCACGATAAAGAGAAATGAATCAATTCGACCAATCAAAATTAACAAATTGGAGTGGGCAAGGAAAGGAGCTATTGGGGATTTAC	T	INDEL	splice_acceptor_variant&splice_donor_variant&splice_region_variant&intron_variant	HIGH	TraesCS1B03G0477200.1	1	TraesCS1B03G0477200	c.31+1_32-1del
1B	98571767	288584626	23	0	0.979	0.979	0.586	64	47	288584626	TCTGTTGCATAAGAAGCACAACACAACACACCAATTCAAAAAAAGAAACAATTTTCTCACGATAAAGAGAAATGAATCAATTCGACCAATCAAAATTAACAAATTGGAGTGGGCAAGGAAAGGAGCTATTGGGGATTTAC	T	INDEL	splice_acceptor_variant&splice_donor_variant&splice_region_variant&intron_variant	HIGH	TraesCS1B03G0477200.2	1	TraesCS1B03G0477200	c.31+1_32-1del
1B	98571767	288584626	23	0	0.979	0.979	0.586	64	47	288584626	TCTGTTGCATAAGAAGCACAACACAACACACCAATTCAAAAAAAGAAACAATTTTCTCACGATAAAGAGAAATGAATCAATTCGACCAATCAAAATTAACAAATTGGAGTGGGCAAGGAAAGGAGCTATTGGGGATTTAC	T	INDEL	upstream_gene_variant	MODIFIER	TraesCS1B03G0477300LC.1	-1	TraesCS1B03G0477300LC	c.-1802_-1664del
1B	123181082	371792142	82	0	0.964	0.964	0.409	53	84	123181083	AAGGTCTGTCTTTCTTTGTTGGTCTTATTACATGCAATTTATTTGACGTTGCAGTTGCTTTGCTGATTAGAAAGTTGTAGCGAACACTGTTATCTCCATTGGTTCGTCTGAAGGCCAAAAGATACCCCCGCGCTGACACATTTATTTATCCATGAGC	A	INDEL	frameshift_variant&splice_donor_variant&splice_region_variant&intron_variant	HIGH	TraesCS1B03G0282900.1	10	TraesCS1B03G0282900	c.1204_1206-3del	p.Ser402fs
1B	123181082	371792142	82	0	0.72	0.72	0.684	32	25	125315833	T	TGTGCCATGCCAC	INDEL	splice_region_variant&intron_variant	LOW	TraesCS1B03G0288600.1	9	TraesCS1B03G0288600	c.751-3_751-2insGTGGCATGGCAC
1B	123181082	371792142	82	0	0.919	0.919	0.46	26	37	136739289	C	CATTGTGCTGAACAGAACAACAA	INDEL	splice_acceptor_variant&intron_variant	HIGH	TraesCS1B03G0304900.1	14	TraesCS1B03G0304900	c.1297-2_1297-1insTTGTTGTTCTGTTCAGCACAAT
1B	123181082	371792142	82	0.864	0	-0.864	0.525	44	36	150173406	T	TGCGCGGTGCAGCGTCCACATTCAGGGACAAGCTGGGGATGGAGGAGCTCGCTGGAGCAGCACC	INDEL	downstream_gene_variant	MODIFIER	TraesCS1B03G0330000LC.1	-1	TraesCS1B03G0330000LC	c.*805_*806insGCGCGGTGCAGCGTCCACATTCAGGGACAAGCTGGGGATGGAGGAGCTCGCTGGAGCAGCACC
1B	123181082	371792142	82	0.864	0	-0.864	0.525	44	36	150173406	T	TGCGCGGTGCAGCGTCCACATTCAGGGACAAGCTGGGGATGGAGGAGCTCGCTGGAGCAGCACC	INDEL	downstream_gene_variant	MODIFIER	TraesCS1B03G0330100LC.1	-1	TraesCS1B03G0330100LC	c.*3973_*3974insGGTGCTGCTCCAGCGAGCTCCTCCATCCCCAGCTTGTCCCTGAATGTGGACGCTGCACCGCGC
1B	123181082	371792142	82	0.864	0	-0.864	0.525	44	36	150173406	T	TGCGCGGTGCAGCGTCCACATTCAGGGACAAGCTGGGGATGGAGGAGCTCGCTGGAGCAGCACC	INDEL	intergenic_region	MODIFIER	TraesCS1B03G0330000LC-TraesCS1B03G0330100LC	-1	TraesCS1B03G0330000LC-TraesCS1B03G0330100LC	n.150173406_150173407insGCGCGGTGCAGCGTCCACATTCAGGGACAAGCTGGGGATGGAGGAGCTCGCTGGAGCAGCACC
1B	123181082	371792142	82	0	0.862	0.862	0.356	22	65	163224839	T	TCCATTTCATTGTTGCTGCCTGTGAAAACATGATCAGTGGGACAGGCATGAGGCCTGGCGACATTGTG	INDEL	splice_region_variant&intron_variant	LOW	TraesCS1B03G0346000.1	5	TraesCS1B03G0346000	c.1035+2_1035+3insCCATTTCATTGTTGCTGCCTGTGAAAACATGATCAGTGGGACAGGCATGAGGCCTGGCGACATTGTG
1B	123181082	371792142	82	0	0.862	0.862	0.356	22	65	163224839	T	TCCATTTCATTGTTGCTGCCTGTGAAAACATGATCAGTGGGACAGGCATGAGGCCTGGCGACATTGTG	INDEL	splice_region_variant&intron_variant	LOW	TraesCS1B03G0346000.2	5	TraesCS1B03G0346000	c.1035+2_1035+3insCCATTTCATTGTTGCTGCCTGTGAAAACATGATCAGTGGGACAGGCATGAGGCCTGGCGACATTGTG
1B	123181082	371792142	82	0.766	0	-0.766	0.404	77	22	165944136	CCCTGCAAATCATTCAAACTGTCAACCTGAGCTTTTTTGTTTAGCAGCAATGCACATAGCCGTTATAGTTCATACACAGGCAAACAGTCTGAGCTGTGAACTATGAACTGTA	C	INDEL	frameshift_variant&splice_acceptor_variant&splice_donor_variant&splice_region_variant&intron_variant	HIGH	TraesCS1B03G0350000LC.1	5	TraesCS1B03G0350000LC	c.309+2_310del	p.Gly104fs
1B	123181082	371792142	82	0.766	0	-0.766	0.404	77	22	165944136	CCCTGCAAATCATTCAAACTGTCAACCTGAGCTTTTTTGTTTAGCAGCAATGCACATAGCCGTTATAGTTCATACACAGGCAAACAGTCTGAGCTGTGAACTATGAACTGTA	C	INDEL	upstream_gene_variant	MODIFIER	TraesCS1B03G0349800LC.1	-1	TraesCS1B03G0349800LC	c.-2655_-2545del
1B	123181082	371792142	82	0.766	0	-0.766	0.404	77	22	165944136	CCCTGCAAATCATTCAAACTGTCAACCTGAGCTTTTTTGTTTAGCAGCAATGCACATAGCCGTTATAGTTCATACACAGGCAAACAGTCTGAGCTGTGAACTATGAACTGTA	C	INDEL	upstream_gene_variant	MODIFIER	TraesCS1B03G0349900LC.1	-1	TraesCS1B03G0349900LC	c.-2235_-2125del
1B	123181082	371792142	82	0.766	0	-0.766	0.404	77	22	165944136	CCCTGCAAATCATTCAAACTGTCAACCTGAGCTTTTTTGTTTAGCAGCAATGCACATAGCCGTTATAGTTCATACACAGGCAAACAGTCTGAGCTGTGAACTATGAACTGTA	C	INDEL	downstream_gene_variant	MODIFIER	TraesCS1B03G0349700LC.1	-1	TraesCS1B03G0349700LC	c.*3985_*4095del
1B	123181082	371792142	82	0	0.794	0.794	0.587	58	63	172362285	AACCTGGTAACCACAAGTAGAAGTGATGCTTCAAGTACCAGTGCCCTATTCAAGCGAAGGCATTGGAGCGACAAAAAAGGGGGTGCTAAAAGGGAACATGTAAATTTTCTAACATCTTTTTTGCAGCTAAAATATTTCTGTACCTTGAATTGCTAGATGATAATGTAGGCTTGGTATAAAAAATTCAAAAGATACGTCCACCGAAACACACACAT	A	INDEL	frameshift_variant&splice_acceptor_variant&splice_region_variant&intron_variant	HIGH	TraesCS1B03G0359400.1	7	TraesCS1B03G0359400	c.501+3_503del	p.Val168fs
1B	123181082	371792142	82	0	0.794	0.794	0.587	58	63	172362285	AACCTGGTAACCACAAGTAGAAGTGATGCTTCAAGTACCAGTGCCCTATTCAAGCGAAGGCATTGGAGCGACAAAAAAGGGGGTGCTAAAAGGGAACATGTAAATTTTCTAACATCTTTTTTGCAGCTAAAATATTTCTGTACCTTGAATTGCTAGATGATAATGTAGGCTTGGTATAAAAAATTCAAAAGATACGTCCACCGAAACACACACAT	A	INDEL	upstream_gene_variant	MODIFIER	TraesCS1B03G0359300LC.1	-1	TraesCS1B03G0359300LC	c.-3127_-2914del
1B	123181082	371792142	82	0	0.933	0.933	0.517	28	30	184988869	T	TATTTGCTGTATCTGCCTAGCAAGATACTCGAACAATGATGATCTCC	INDEL	splice_donor_variant&intron_variant	HIGH	TraesCS1B03G0374900.1	6	TraesCS1B03G0374900	c.1035_1035+1insATTTGCTGTATCTGCCTAGCAAGATACTCGAACAATGATGATCTCC
1B	123181082	371792142	82	0.76	0	-0.76	0.648	25	29	210833345	G	GGTAAATCGTTCTCCAGAAGTTTCCAGTCATGCTGAATTCTTTTTGTCCACTCTTTCCCTGTCTTTC	INDEL	splice_region_variant&intron_variant	LOW	TraesCS1B03G0401800.2	4	TraesCS1B03G0401800	c.755-4_755-3insGAAAGACAGGGAAAGAGTGGACAAAAAGAATTCAGCATGACTGGAAACTTCTGGAGAACGATTTAC
1B	123181082	371792142	82	0.76	0	-0.76	0.648	25	29	210833345	G	GGTAAATCGTTCTCCAGAAGTTTCCAGTCATGCTGAATTCTTTTTGTCCACTCTTTCCCTGTCTTTC	INDEL	splice_region_variant&intron_variant	LOW	TraesCS1B03G0401800.1	3	TraesCS1B03G0401800	c.683-4_683-3insGAAAGACAGGGAAAGAGTGGACAAAAAGAATTCAGCATGACTGGAAACTTCTGGAGAACGATTTAC
1B	123181082	371792142	82	0.76	0	-0.76	0.648	25	29	210833345	G	GGTAAATCGTTCTCCAGAAGTTTCCAGTCATGCTGAATTCTTTTTGTCCACTCTTTCCCTGTCTTTC	INDEL	downstream_gene_variant	MODIFIER	TraesCS1B03G0401900LC.1	-1	TraesCS1B03G0401900LC	c.*236_*237insGAAAGACAGGGAAAGAGTGGACAAAAAGAATTCAGCATGACTGGAAACTTCTGGAGAACGATTTAC
1B	123181082	371792142	82	0.941	0	-0.941	0.538	51	53	251942245	C	CA	INDEL	splice_acceptor_variant&intron_variant	HIGH	TraesCS1B03G0435100.2	5	TraesCS1B03G0435100	c.763-2_763-1insT
1B	123181082	371792142	82	0.941	0	-0.941	0.538	51	53	251942245	C	CA	INDEL	splice_acceptor_variant&intron_variant	HIGH	TraesCS1B03G0435100.1	3	TraesCS1B03G0435100	c.436-2_436-1insT
1B	123181082	371792142	82	0	1	1	0.533	32	28	261597163	C	CCTTCAA	INDEL	splice_acceptor_variant&intron_variant	HIGH	TraesCS1B03G0442700.1	13	TraesCS1B03G0442700	c.2356-1_2356insTTGAAG
1B	123181082	371792142	82	0	1	1	0.533	32	28	261597163	C	CCTTCAA	INDEL	downstream_gene_variant	MODIFIER	TraesCS1B03G0442600LC.1	-1	TraesCS1B03G0442600LC	c.*4183_*4184insCTTCAA
1B	123181082	371792142	82	0	1	1	0.533	32	28	261597163	C	CCTTCAA	INDEL	intron_variant	MODIFIER	TraesCS1B03G0442700.2	13	TraesCS1B03G0442700	c.2356-17_2356-16insTTGAAG
1B	123181082	371792142	82	0	1	1	0.533	32	28	261597163	C	CCTTCAA	INDEL	intron_variant	MODIFIER	TraesCS1B03G0442700.3	13	TraesCS1B03G0442700	c.2356-60_2356-59insTTGAAG
1B	123181082	371792142	82	0.868	0	-0.868	0.582	38	41	266126542	G	GAGGGCAGTAGCTCACACTGTGAGGGGCTTCAGCAACGGGGCCTATTATGCACATGATGGTGTGA	INDEL	splice_donor_variant&intron_variant	HIGH	TraesCS1B03G0447500LC.1	11	TraesCS1B03G0447500LC	c.1064+1_1064+2insAGGGCAGTAGCTCACACTGTGAGGGGCTTCAGCAACGGGGCCTATTATGCACATGATGGTGTGA
1B	123181082	371792142	82	0.868	0	-0.868	0.582	38	41	266126542	G	GAGGGCAGTAGCTCACACTGTGAGGGGCTTCAGCAACGGGGCCTATTATGCACATGATGGTGTGA	INDEL	downstream_gene_variant	MODIFIER	TraesCS1B03G0447600LC.1	-1	TraesCS1B03G0447600LC	c.*633_*634insAGGGCAGTAGCTCACACTGTGAGGGGCTTCAGCAACGGGGCCTATTATGCACATGATGGTGTGA
1B	123181082	371792142	82	0.955	0	-0.955	0.58	22	28	270885692	C	CATAAAGGTTGCCGTAATCATCT	INDEL	splice_acceptor_variant&intron_variant	HIGH	TraesCS1B03G0453000.2	12	TraesCS1B03G0453000	c.1915-2_1915-1insAGATGATTACGGCAACCTTTAT
1B	123181082	371792142	82	0.955	0	-0.955	0.58	22	28	270885692	C	CATAAAGGTTGCCGTAATCATCT	INDEL	splice_acceptor_variant&intron_variant	HIGH	TraesCS1B03G0453000.1	13	TraesCS1B03G0453000	c.1879-2_1879-1insAGATGATTACGGCAACCTTTAT
1B	123181082	371792142	82	0	0.952	0.952	0.54	45	42	288578615	C	CATTCTTACGCTGGATGTGATTGAACTCATCCTCATTCAAGACACGGCGTGGTGATCCATCATCAA	INDEL	splice_acceptor_variant&intron_variant	HIGH	TraesCS1B03G0477200.1	4	TraesCS1B03G0477200	c.433-1_433insTTGATGATGGATCACCACGCCGTGTCTTGAATGAGGATGAGTTCAATCACATCCAGCGTAAGAAT
1B	123181082	371792142	82	0	0.952	0.952	0.54	45	42	288578615	C	CATTCTTACGCTGGATGTGATTGAACTCATCCTCATTCAAGACACGGCGTGGTGATCCATCATCAA	INDEL	splice_acceptor_variant&intron_variant	HIGH	TraesCS1B03G0477200.2	4	TraesCS1B03G0477200	c.433-1_433insTTGATGATGGATCACCACGCCGTGTCTTGAATGAGGATGAGTTCAATCACATCCAGCGTAAGAAT
1B	123181082	371792142	82	0	0.979	0.979	0.586	64	47	288584626	TCTGTTGCATAAGAAGCACAACACAACACACCAATTCAAAAAAAGAAACAATTTTCTCACGATAAAGAGAAATGAATCAATTCGACCAATCAAAATTAACAAATTGGAGTGGGCAAGGAAAGGAGCTATTGGGGATTTAC	T	INDEL	splice_acceptor_variant&splice_donor_variant&splice_region_variant&intron_variant	HIGH	TraesCS1B03G0477200.1	1	TraesCS1B03G0477200	c.31+1_32-1del
1B	123181082	371792142	82	0	0.979	0.979	0.586	64	47	288584626	TCTGTTGCATAAGAAGCACAACACAACACACCAATTCAAAAAAAGAAACAATTTTCTCACGATAAAGAGAAATGAATCAATTCGACCAATCAAAATTAACAAATTGGAGTGGGCAAGGAAAGGAGCTATTGGGGATTTAC	T	INDEL	splice_acceptor_variant&splice_donor_variant&splice_region_variant&intron_variant	HIGH	TraesCS1B03G0477200.2	1	TraesCS1B03G0477200	c.31+1_32-1del
1B	123181082	371792142	82	0	0.979	0.979	0.586	64	47	288584626	TCTGTTGCATAAGAAGCACAACACAACACACCAATTCAAAAAAAGAAACAATTTTCTCACGATAAAGAGAAATGAATCAATTCGACCAATCAAAATTAACAAATTGGAGTGGGCAAGGAAAGGAGCTATTGGGGATTTAC	T	INDEL	upstream_gene_variant	MODIFIER	TraesCS1B03G0477300LC.1	-1	TraesCS1B03G0477300LC	c.-1802_-1664del
1B	123181082	371792142	82	0	0.962	0.962	0.528	27	26	305815383	G	GATTGAATGAAGCTGTTATGCATTTTGGAGAGAGCATCAA	INDEL	splice_donor_variant&intron_variant	HIGH	TraesCS1B03G0496900.1	1	TraesCS1B03G0496900	c.278_278+1insATTGAATGAAGCTGTTATGCATTTTGGAGAGAGCATCAA
1B	123181082	371792142	82	0	0.962	0.962	0.528	27	26	305815383	G	GATTGAATGAAGCTGTTATGCATTTTGGAGAGAGCATCAA	INDEL	downstream_gene_variant	MODIFIER	TraesCS1B03G0496800LC.1	-1	TraesCS1B03G0496800LC	c.*1739_*1740insATTGAATGAAGCTGTTATGCATTTTGGAGAGAGCATCAA
1B	123181082	371792142	82	0	0.962	0.962	0.528	27	26	305815383	G	GATTGAATGAAGCTGTTATGCATTTTGGAGAGAGCATCAA	INDEL	downstream_gene_variant	MODIFIER	TraesCS1B03G0497000.2	-1	TraesCS1B03G0497000	c.*3334_*3335insTTGATGCTCTCTCCAAAATGCATAACAGCTTCATTCAAT
1B	123181082	371792142	82	0	0.962	0.962	0.528	27	26	305815383	G	GATTGAATGAAGCTGTTATGCATTTTGGAGAGAGCATCAA	INDEL	downstream_gene_variant	MODIFIER	TraesCS1B03G0497000.1	-1	TraesCS1B03G0497000	c.*3334_*3335insTTGATGCTCTCTCCAAAATGCATAACAGCTTCATTCAAT
1B	123181082	371792142	82	0	0.962	0.962	0.528	27	26	305815383	G	GATTGAATGAAGCTGTTATGCATTTTGGAGAGAGCATCAA	INDEL	downstream_gene_variant	MODIFIER	TraesCS1B03G0497000.3	-1	TraesCS1B03G0497000	c.*3334_*3335insTTGATGCTCTCTCCAAAATGCATAACAGCTTCATTCAAT
1B	123181082	371792142	82	0	0.962	0.962	0.528	27	26	305815383	G	GATTGAATGAAGCTGTTATGCATTTTGGAGAGAGCATCAA	INDEL	downstream_gene_variant	MODIFIER	TraesCS1B03G0497000.4	-1	TraesCS1B03G0497000	c.*4401_*4402insTTGATGCTCTCTCCAAAATGCATAACAGCTTCATTCAAT
1B	123181082	371792142	82	0	0.962	0.962	0.528	27	26	305815383	G	GATTGAATGAAGCTGTTATGCATTTTGGAGAGAGCATCAA	INDEL	downstream_gene_variant	MODIFIER	TraesCS1B03G0497000.5	-1	TraesCS1B03G0497000	c.*4401_*4402insTTGATGCTCTCTCCAAAATGCATAACAGCTTCATTCAAT
1B	123181082	371792142	82	0	0.962	0.962	0.528	27	26	305815383	G	GATTGAATGAAGCTGTTATGCATTTTGGAGAGAGCATCAA	INDEL	downstream_gene_variant	MODIFIER	TraesCS1B03G0497000.6	-1	TraesCS1B03G0497000	c.*4401_*4402insTTGATGCTCTCTCCAAAATGCATAACAGCTTCATTCAAT
1B	123181082	371792142	82	0	0.907	0.907	0.382	55	118	321048563	CCCTACAAACCAGAAGACATAAGGCAATCAAGATTAAGATTAGCACTTCAAACTACTGCAATCTATCATTACCAATTAATAAAAAATAACAAACTAAAGTAAAATATCACAAATTGGTACAAAACAACAGTACTTATTTCATGAGAAAAATAAATAAAGAGAACATA	C	INDEL	frameshift_variant&splice_acceptor_variant&splice_donor_variant&splice_region_variant&intron_variant	HIGH	TraesCS1B03G0517800.1	18	TraesCS1B03G0517800	c.2475+2_2476del	p.Gly826fs
1B	123181082	371792142	82	0	0.958	0.958	0.474	79	96	348314507	AAGGTAAGAGTTATATTTGATCAAATGCTTGTTTGCCCTGTCCATACTCTTTTGACCTGCTTATCCCTTTTTGGTTGCTCAAATGTGCAGTATATCAATGAAGCCCTAATGCCCATGCTGTTTTTTTTTGTGTGC	A	INDEL	frameshift_variant&splice_donor_variant&splice_region_variant&intron_variant	HIGH	TraesCS1B03G0563600.1	2	TraesCS1B03G0563600	c.464_466-3del	p.Ser157fs
1B	123181082	371792142	82	0	1	1	0.261	24	68	361799048	G	GTGGTTTGTATTCGCCGCCTCCTCCAGATTTTCCACAGGCCTCGACGTCGTATTTCTCATGCATTGCGC	INDEL	splice_region_variant&intron_variant	LOW	TraesCS1B03G0581400.1	10	TraesCS1B03G0581400	c.1690-4_1690-3insGCGCAATGCATGAGAAATACGACGTCGAGGCCTGTGGAAAATCTGGAGGAGGCGGCGAATACAAACCA
1B	123181082	371792142	82	0	0.712	0.712	0.561	41	66	371792142	T	TTGCAATGAAGACAATTTTGAGCGTTTATGTGAAGCTTCGG	INDEL	splice_region_variant&intron_variant	LOW	TraesCS1B03G0593700.1	17	TraesCS1B03G0593700	c.1654-3_1654-2insCCGAAGCTTCACATAAACGCTCAAAATTGTCTTCATTGCA
1B	123181082	371792142	82	0	0.712	0.712	0.561	41	66	371792142	T	TTGCAATGAAGACAATTTTGAGCGTTTATGTGAAGCTTCGG	INDEL	upstream_gene_variant	MODIFIER	TraesCS1B03G0593500LC.1	-1	TraesCS1B03G0593500LC	c.-1493_-1492insCCGAAGCTTCACATAAACGCTCAAAATTGTCTTCATTGCA
1B	123181082	371792142	82	0	0.712	0.712	0.561	41	66	371792142	T	TTGCAATGAAGACAATTTTGAGCGTTTATGTGAAGCTTCGG	INDEL	downstream_gene_variant	MODIFIER	TraesCS1B03G0593600.1	-1	TraesCS1B03G0593600	c.*1531_*1532insTGCAATGAAGACAATTTTGAGCGTTTATGTGAAGCTTCGG
1B	165944135	413553334	34	0.766	0	-0.766	0.404	77	22	165944136	CCCTGCAAATCATTCAAACTGTCAACCTGAGCTTTTTTGTTTAGCAGCAATGCACATAGCCGTTATAGTTCATACACAGGCAAACAGTCTGAGCTGTGAACTATGAACTGTA	C	INDEL	frameshift_variant&splice_acceptor_variant&splice_donor_variant&splice_region_variant&intron_variant	HIGH	TraesCS1B03G0350000LC.1	5	TraesCS1B03G0350000LC	c.309+2_310del	p.Gly104fs
1B	165944135	413553334	34	0.766	0	-0.766	0.404	77	22	165944136	CCCTGCAAATCATTCAAACTGTCAACCTGAGCTTTTTTGTTTAGCAGCAATGCACATAGCCGTTATAGTTCATACACAGGCAAACAGTCTGAGCTGTGAACTATGAACTGTA	C	INDEL	upstream_gene_variant	MODIFIER	TraesCS1B03G0349800LC.1	-1	TraesCS1B03G0349800LC	c.-2655_-2545del
1B	165944135	413553334	34	0.766	0	-0.766	0.404	77	22	165944136	CCCTGCAAATCATTCAAACTGTCAACCTGAGCTTTTTTGTTTAGCAGCAATGCACATAGCCGTTATAGTTCATACACAGGCAAACAGTCTGAGCTGTGAACTATGAACTGTA	C	INDEL	upstream_gene_variant	MODIFIER	TraesCS1B03G0349900LC.1	-1	TraesCS1B03G0349900LC	c.-2235_-2125del
1B	165944135	413553334	34	0.766	0	-0.766	0.404	77	22	165944136	CCCTGCAAATCATTCAAACTGTCAACCTGAGCTTTTTTGTTTAGCAGCAATGCACATAGCCGTTATAGTTCATACACAGGCAAACAGTCTGAGCTGTGAACTATGAACTGTA	C	INDEL	downstream_gene_variant	MODIFIER	TraesCS1B03G0349700LC.1	-1	TraesCS1B03G0349700LC	c.*3985_*4095del
1B	165944135	413553334	34	0	0.794	0.794	0.587	58	63	172362285	AACCTGGTAACCACAAGTAGAAGTGATGCTTCAAGTACCAGTGCCCTATTCAAGCGAAGGCATTGGAGCGACAAAAAAGGGGGTGCTAAAAGGGAACATGTAAATTTTCTAACATCTTTTTTGCAGCTAAAATATTTCTGTACCTTGAATTGCTAGATGATAATGTAGGCTTGGTATAAAAAATTCAAAAGATACGTCCACCGAAACACACACAT	A	INDEL	frameshift_variant&splice_acceptor_variant&splice_region_variant&intron_variant	HIGH	TraesCS1B03G0359400.1	7	TraesCS1B03G0359400	c.501+3_503del	p.Val168fs
1B	165944135	413553334	34	0	0.794	0.794	0.587	58	63	172362285	AACCTGGTAACCACAAGTAGAAGTGATGCTTCAAGTACCAGTGCCCTATTCAAGCGAAGGCATTGGAGCGACAAAAAAGGGGGTGCTAAAAGGGAACATGTAAATTTTCTAACATCTTTTTTGCAGCTAAAATATTTCTGTACCTTGAATTGCTAGATGATAATGTAGGCTTGGTATAAAAAATTCAAAAGATACGTCCACCGAAACACACACAT	A	INDEL	upstream_gene_variant	MODIFIER	TraesCS1B03G0359300LC.1	-1	TraesCS1B03G0359300LC	c.-3127_-2914del
1B	165944135	413553334	34	0	0.933	0.933	0.517	28	30	184988869	T	TATTTGCTGTATCTGCCTAGCAAGATACTCGAACAATGATGATCTCC	INDEL	splice_donor_variant&intron_variant	HIGH	TraesCS1B03G0374900.1	6	TraesCS1B03G0374900	c.1035_1035+1insATTTGCTGTATCTGCCTAGCAAGATACTCGAACAATGATGATCTCC
1B	165944135	413553334	34	0.76	0	-0.76	0.648	25	29	210833345	G	GGTAAATCGTTCTCCAGAAGTTTCCAGTCATGCTGAATTCTTTTTGTCCACTCTTTCCCTGTCTTTC	INDEL	splice_region_variant&intron_variant	LOW	TraesCS1B03G0401800.2	4	TraesCS1B03G0401800	c.755-4_755-3insGAAAGACAGGGAAAGAGTGGACAAAAAGAATTCAGCATGACTGGAAACTTCTGGAGAACGATTTAC
1B	165944135	413553334	34	0.76	0	-0.76	0.648	25	29	210833345	G	GGTAAATCGTTCTCCAGAAGTTTCCAGTCATGCTGAATTCTTTTTGTCCACTCTTTCCCTGTCTTTC	INDEL	splice_region_variant&intron_variant	LOW	TraesCS1B03G0401800.1	3	TraesCS1B03G0401800	c.683-4_683-3insGAAAGACAGGGAAAGAGTGGACAAAAAGAATTCAGCATGACTGGAAACTTCTGGAGAACGATTTAC
1B	165944135	413553334	34	0.76	0	-0.76	0.648	25	29	210833345	G	GGTAAATCGTTCTCCAGAAGTTTCCAGTCATGCTGAATTCTTTTTGTCCACTCTTTCCCTGTCTTTC	INDEL	downstream_gene_variant	MODIFIER	TraesCS1B03G0401900LC.1	-1	TraesCS1B03G0401900LC	c.*236_*237insGAAAGACAGGGAAAGAGTGGACAAAAAGAATTCAGCATGACTGGAAACTTCTGGAGAACGATTTAC
1B	165944135	413553334	34	0.941	0	-0.941	0.538	51	53	251942245	C	CA	INDEL	splice_acceptor_variant&intron_variant	HIGH	TraesCS1B03G0435100.2	5	TraesCS1B03G0435100	c.763-2_763-1insT
1B	165944135	413553334	34	0.941	0	-0.941	0.538	51	53	251942245	C	CA	INDEL	splice_acceptor_variant&intron_variant	HIGH	TraesCS1B03G0435100.1	3	TraesCS1B03G0435100	c.436-2_436-1insT
1B	165944135	413553334	34	0	1	1	0.533	32	28	261597163	C	CCTTCAA	INDEL	splice_acceptor_variant&intron_variant	HIGH	TraesCS1B03G0442700.1	13	TraesCS1B03G0442700	c.2356-1_2356insTTGAAG
1B	165944135	413553334	34	0	1	1	0.533	32	28	261597163	C	CCTTCAA	INDEL	downstream_gene_variant	MODIFIER	TraesCS1B03G0442600LC.1	-1	TraesCS1B03G0442600LC	c.*4183_*4184insCTTCAA
1B	165944135	413553334	34	0	1	1	0.533	32	28	261597163	C	CCTTCAA	INDEL	intron_variant	MODIFIER	TraesCS1B03G0442700.2	13	TraesCS1B03G0442700	c.2356-17_2356-16insTTGAAG
1B	165944135	413553334	34	0	1	1	0.533	32	28	261597163	C	CCTTCAA	INDEL	intron_variant	MODIFIER	TraesCS1B03G0442700.3	13	TraesCS1B03G0442700	c.2356-60_2356-59insTTGAAG
1B	165944135	413553334	34	0.868	0	-0.868	0.582	38	41	266126542	G	GAGGGCAGTAGCTCACACTGTGAGGGGCTTCAGCAACGGGGCCTATTATGCACATGATGGTGTGA	INDEL	splice_donor_variant&intron_variant	HIGH	TraesCS1B03G0447500LC.1	11	TraesCS1B03G0447500LC	c.1064+1_1064+2insAGGGCAGTAGCTCACACTGTGAGGGGCTTCAGCAACGGGGCCTATTATGCACATGATGGTGTGA
1B	165944135	413553334	34	0.868	0	-0.868	0.582	38	41	266126542	G	GAGGGCAGTAGCTCACACTGTGAGGGGCTTCAGCAACGGGGCCTATTATGCACATGATGGTGTGA	INDEL	downstream_gene_variant	MODIFIER	TraesCS1B03G0447600LC.1	-1	TraesCS1B03G0447600LC	c.*633_*634insAGGGCAGTAGCTCACACTGTGAGGGGCTTCAGCAACGGGGCCTATTATGCACATGATGGTGTGA
1B	165944135	413553334	34	0.955	0	-0.955	0.58	22	28	270885692	C	CATAAAGGTTGCCGTAATCATCT	INDEL	splice_acceptor_variant&intron_variant	HIGH	TraesCS1B03G0453000.2	12	TraesCS1B03G0453000	c.1915-2_1915-1insAGATGATTACGGCAACCTTTAT
1B	165944135	413553334	34	0.955	0	-0.955	0.58	22	28	270885692	C	CATAAAGGTTGCCGTAATCATCT	INDEL	splice_acceptor_variant&intron_variant	HIGH	TraesCS1B03G0453000.1	13	TraesCS1B03G0453000	c.1879-2_1879-1insAGATGATTACGGCAACCTTTAT
1B	165944135	413553334	34	0	0.952	0.952	0.54	45	42	288578615	C	CATTCTTACGCTGGATGTGATTGAACTCATCCTCATTCAAGACACGGCGTGGTGATCCATCATCAA	INDEL	splice_acceptor_variant&intron_variant	HIGH	TraesCS1B03G0477200.1	4	TraesCS1B03G0477200	c.433-1_433insTTGATGATGGATCACCACGCCGTGTCTTGAATGAGGATGAGTTCAATCACATCCAGCGTAAGAAT
1B	165944135	413553334	34	0	0.952	0.952	0.54	45	42	288578615	C	CATTCTTACGCTGGATGTGATTGAACTCATCCTCATTCAAGACACGGCGTGGTGATCCATCATCAA	INDEL	splice_acceptor_variant&intron_variant	HIGH	TraesCS1B03G0477200.2	4	TraesCS1B03G0477200	c.433-1_433insTTGATGATGGATCACCACGCCGTGTCTTGAATGAGGATGAGTTCAATCACATCCAGCGTAAGAAT
1B	165944135	413553334	34	0	0.979	0.979	0.586	64	47	288584626	TCTGTTGCATAAGAAGCACAACACAACACACCAATTCAAAAAAAGAAACAATTTTCTCACGATAAAGAGAAATGAATCAATTCGACCAATCAAAATTAACAAATTGGAGTGGGCAAGGAAAGGAGCTATTGGGGATTTAC	T	INDEL	splice_acceptor_variant&splice_donor_variant&splice_region_variant&intron_variant	HIGH	TraesCS1B03G0477200.1	1	TraesCS1B03G0477200	c.31+1_32-1del
1B	165944135	413553334	34	0	0.979	0.979	0.586	64	47	288584626	TCTGTTGCATAAGAAGCACAACACAACACACCAATTCAAAAAAAGAAACAATTTTCTCACGATAAAGAGAAATGAATCAATTCGACCAATCAAAATTAACAAATTGGAGTGGGCAAGGAAAGGAGCTATTGGGGATTTAC	T	INDEL	splice_acceptor_variant&splice_donor_variant&splice_region_variant&intron_variant	HIGH	TraesCS1B03G0477200.2	1	TraesCS1B03G0477200	c.31+1_32-1del
1B	165944135	413553334	34	0	0.979	0.979	0.586	64	47	288584626	TCTGTTGCATAAGAAGCACAACACAACACACCAATTCAAAAAAAGAAACAATTTTCTCACGATAAAGAGAAATGAATCAATTCGACCAATCAAAATTAACAAATTGGAGTGGGCAAGGAAAGGAGCTATTGGGGATTTAC	T	INDEL	upstream_gene_variant	MODIFIER	TraesCS1B03G0477300LC.1	-1	TraesCS1B03G0477300LC	c.-1802_-1664del
1B	165944135	413553334	34	0	0.962	0.962	0.528	27	26	305815383	G	GATTGAATGAAGCTGTTATGCATTTTGGAGAGAGCATCAA	INDEL	splice_donor_variant&intron_variant	HIGH	TraesCS1B03G0496900.1	1	TraesCS1B03G0496900	c.278_278+1insATTGAATGAAGCTGTTATGCATTTTGGAGAGAGCATCAA
1B	165944135	413553334	34	0	0.962	0.962	0.528	27	26	305815383	G	GATTGAATGAAGCTGTTATGCATTTTGGAGAGAGCATCAA	INDEL	downstream_gene_variant	MODIFIER	TraesCS1B03G0496800LC.1	-1	TraesCS1B03G0496800LC	c.*1739_*1740insATTGAATGAAGCTGTTATGCATTTTGGAGAGAGCATCAA
1B	165944135	413553334	34	0	0.962	0.962	0.528	27	26	305815383	G	GATTGAATGAAGCTGTTATGCATTTTGGAGAGAGCATCAA	INDEL	downstream_gene_variant	MODIFIER	TraesCS1B03G0497000.2	-1	TraesCS1B03G0497000	c.*3334_*3335insTTGATGCTCTCTCCAAAATGCATAACAGCTTCATTCAAT
1B	165944135	413553334	34	0	0.962	0.962	0.528	27	26	305815383	G	GATTGAATGAAGCTGTTATGCATTTTGGAGAGAGCATCAA	INDEL	downstream_gene_variant	MODIFIER	TraesCS1B03G0497000.1	-1	TraesCS1B03G0497000	c.*3334_*3335insTTGATGCTCTCTCCAAAATGCATAACAGCTTCATTCAAT
1B	165944135	413553334	34	0	0.962	0.962	0.528	27	26	305815383	G	GATTGAATGAAGCTGTTATGCATTTTGGAGAGAGCATCAA	INDEL	downstream_gene_variant	MODIFIER	TraesCS1B03G0497000.3	-1	TraesCS1B03G0497000	c.*3334_*3335insTTGATGCTCTCTCCAAAATGCATAACAGCTTCATTCAAT
1B	165944135	413553334	34	0	0.962	0.962	0.528	27	26	305815383	G	GATTGAATGAAGCTGTTATGCATTTTGGAGAGAGCATCAA	INDEL	downstream_gene_variant	MODIFIER	TraesCS1B03G0497000.4	-1	TraesCS1B03G0497000	c.*4401_*4402insTTGATGCTCTCTCCAAAATGCATAACAGCTTCATTCAAT
1B	165944135	413553334	34	0	0.962	0.962	0.528	27	26	305815383	G	GATTGAATGAAGCTGTTATGCATTTTGGAGAGAGCATCAA	INDEL	downstream_gene_variant	MODIFIER	TraesCS1B03G0497000.5	-1	TraesCS1B03G0497000	c.*4401_*4402insTTGATGCTCTCTCCAAAATGCATAACAGCTTCATTCAAT
1B	165944135	413553334	34	0	0.962	0.962	0.528	27	26	305815383	G	GATTGAATGAAGCTGTTATGCATTTTGGAGAGAGCATCAA	INDEL	downstream_gene_variant	MODIFIER	TraesCS1B03G0497000.6	-1	TraesCS1B03G0497000	c.*4401_*4402insTTGATGCTCTCTCCAAAATGCATAACAGCTTCATTCAAT
1B	165944135	413553334	34	0	0.907	0.907	0.382	55	118	321048563	CCCTACAAACCAGAAGACATAAGGCAATCAAGATTAAGATTAGCACTTCAAACTACTGCAATCTATCATTACCAATTAATAAAAAATAACAAACTAAAGTAAAATATCACAAATTGGTACAAAACAACAGTACTTATTTCATGAGAAAAATAAATAAAGAGAACATA	C	INDEL	frameshift_variant&splice_acceptor_variant&splice_donor_variant&splice_region_variant&intron_variant	HIGH	TraesCS1B03G0517800.1	18	TraesCS1B03G0517800	c.2475+2_2476del	p.Gly826fs
1B	165944135	413553334	34	0	0.958	0.958	0.474	79	96	348314507	AAGGTAAGAGTTATATTTGATCAAATGCTTGTTTGCCCTGTCCATACTCTTTTGACCTGCTTATCCCTTTTTGGTTGCTCAAATGTGCAGTATATCAATGAAGCCCTAATGCCCATGCTGTTTTTTTTTGTGTGC	A	INDEL	frameshift_variant&splice_donor_variant&splice_region_variant&intron_variant	HIGH	TraesCS1B03G0563600.1	2	TraesCS1B03G0563600	c.464_466-3del	p.Ser157fs
1B	165944135	413553334	34	0	1	1	0.261	24	68	361799048	G	GTGGTTTGTATTCGCCGCCTCCTCCAGATTTTCCACAGGCCTCGACGTCGTATTTCTCATGCATTGCGC	INDEL	splice_region_variant&intron_variant	LOW	TraesCS1B03G0581400.1	10	TraesCS1B03G0581400	c.1690-4_1690-3insGCGCAATGCATGAGAAATACGACGTCGAGGCCTGTGGAAAATCTGGAGGAGGCGGCGAATACAAACCA
1B	165944135	413553334	34	0	0.712	0.712	0.561	41	66	371792142	T	TTGCAATGAAGACAATTTTGAGCGTTTATGTGAAGCTTCGG	INDEL	splice_region_variant&intron_variant	LOW	TraesCS1B03G0593700.1	17	TraesCS1B03G0593700	c.1654-3_1654-2insCCGAAGCTTCACATAAACGCTCAAAATTGTCTTCATTGCA
1B	165944135	413553334	34	0	0.712	0.712	0.561	41	66	371792142	T	TTGCAATGAAGACAATTTTGAGCGTTTATGTGAAGCTTCGG	INDEL	upstream_gene_variant	MODIFIER	TraesCS1B03G0593500LC.1	-1	TraesCS1B03G0593500LC	c.-1493_-1492insCCGAAGCTTCACATAAACGCTCAAAATTGTCTTCATTGCA
1B	165944135	413553334	34	0	0.712	0.712	0.561	41	66	371792142	T	TTGCAATGAAGACAATTTTGAGCGTTTATGTGAAGCTTCGG	INDEL	downstream_gene_variant	MODIFIER	TraesCS1B03G0593600.1	-1	TraesCS1B03G0593600	c.*1531_*1532insTGCAATGAAGACAATTTTGAGCGTTTATGTGAAGCTTCGG
1B	165944135	413553334	34	0	0.786	0.786	0.656	36	28	386933670	C	CT	INDEL	splice_acceptor_variant&intron_variant	HIGH	TraesCS1B03G0613500.1	2	TraesCS1B03G0613500	c.520-2_520-1insA
1B	165944135	413553334	34	0	0.786	0.786	0.656	36	28	386933670	C	CT	INDEL	downstream_gene_variant	MODIFIER	TraesCS1B03G0613600.1	-1	TraesCS1B03G0613600	c.*2767_*2768insA
1B	165944135	413553334	34	0.75	0	-0.75	0.585	36	29	386933671	T	TTGTAAGTTTCTTCATACACG	INDEL	splice_region_variant&intron_variant	LOW	TraesCS1B03G0613500.1	2	TraesCS1B03G0613500	c.520-3_520-2insCGTGTATGAAGAAACTTACA
1B	165944135	413553334	34	0.75	0	-0.75	0.585	36	29	386933671	T	TTGTAAGTTTCTTCATACACG	INDEL	downstream_gene_variant	MODIFIER	TraesCS1B03G0613600.1	-1	TraesCS1B03G0613600	c.*2766_*2767insCGTGTATGAAGAAACTTACA
1B	165944135	413553334	34	0.805	0	-0.805	0.518	82	55	390332894	TCCTGAAAACAAGACGACCAACACAAGTTATCACCTAGGCTGGGAGACCAAAAACATCACAATGTTCTGAAAGACAAAAAATAAGCCATGTGTCAAGCTTTGCTTGTCACATAAAAGGGTTGGTTAGGTGTCATCAGAAATGTGGCTGA	T	INDEL	frameshift_variant&splice_acceptor_variant&splice_donor_variant&splice_region_variant&intron_variant	HIGH	TraesCS1B03G0617600.2	6	TraesCS1B03G0617600	c.606+2_607del	p.Glu203fs
1B	165944135	413553334	34	0.805	0	-0.805	0.518	82	55	390332894	TCCTGAAAACAAGACGACCAACACAAGTTATCACCTAGGCTGGGAGACCAAAAACATCACAATGTTCTGAAAGACAAAAAATAAGCCATGTGTCAAGCTTTGCTTGTCACATAAAAGGGTTGGTTAGGTGTCATCAGAAATGTGGCTGA	T	INDEL	frameshift_variant&splice_acceptor_variant&splice_donor_variant&splice_region_variant&intron_variant	HIGH	TraesCS1B03G0617600.1	5	TraesCS1B03G0617600	c.492+2_493del	p.Glu165fs
1B	165944135	413553334	34	0.805	0	-0.805	0.518	82	55	390332894	TCCTGAAAACAAGACGACCAACACAAGTTATCACCTAGGCTGGGAGACCAAAAACATCACAATGTTCTGAAAGACAAAAAATAAGCCATGTGTCAAGCTTTGCTTGTCACATAAAAGGGTTGGTTAGGTGTCATCAGAAATGTGGCTGA	T	INDEL	upstream_gene_variant	MODIFIER	TraesCS1B03G0617500.1	-1	TraesCS1B03G0617500	c.-1334_-1187del
1B	165944135	413553334	34	0.861	0	-0.861	0.53	36	30	402371679	G	GGATATGCATCTGAGCAGAAGTGCATGTCAGTGGAA	INDEL	splice_donor_variant&intron_variant	HIGH	TraesCS1B03G0635300.1	2	TraesCS1B03G0635300	c.325_325+1insGATATGCATCTGAGCAGAAGTGCATGTCAGTGGAA
1B	165944135	413553334	34	0.861	0	-0.861	0.53	36	30	402371679	G	GGATATGCATCTGAGCAGAAGTGCATGTCAGTGGAA	INDEL	downstream_gene_variant	MODIFIER	TraesCS1B03G0635400.1	-1	TraesCS1B03G0635400	c.*3837_*3838insTTCCACTGACATGCACTTCTGCTCAGATGCATATC
1B	165944135	413553334	34	0.91	0	-0.91	0.609	89	118	413553334	T	TCAATAGCAACCCTGTTAGCAAA	INDEL	splice_region_variant&intron_variant	LOW	TraesCS1B03G0654700LC.1	3	TraesCS1B03G0654700LC	c.580-3_580-2insTTTGCTAACAGGGTTGCTATTG
1B	165944135	413553334	34	0.91	0	-0.91	0.609	89	118	413553334	T	TCAATAGCAACCCTGTTAGCAAA	INDEL	downstream_gene_variant	MODIFIER	TraesCS1B03G0654600.1	-1	TraesCS1B03G0654600	c.*525_*526insCAATAGCAACCCTGTTAGCAAA
1B	261597162	429958447	29	0	1	1	0.533	32	28	261597163	C	CCTTCAA	INDEL	splice_acceptor_variant&intron_variant	HIGH	TraesCS1B03G0442700.1	13	TraesCS1B03G0442700	c.2356-1_2356insTTGAAG
1B	261597162	429958447	29	0	1	1	0.533	32	28	261597163	C	CCTTCAA	INDEL	downstream_gene_variant	MODIFIER	TraesCS1B03G0442600LC.1	-1	TraesCS1B03G0442600LC	c.*4183_*4184insCTTCAA
1B	261597162	429958447	29	0	1	1	0.533	32	28	261597163	C	CCTTCAA	INDEL	intron_variant	MODIFIER	TraesCS1B03G0442700.2	13	TraesCS1B03G0442700	c.2356-17_2356-16insTTGAAG
1B	261597162	429958447	29	0	1	1	0.533	32	28	261597163	C	CCTTCAA	INDEL	intron_variant	MODIFIER	TraesCS1B03G0442700.3	13	TraesCS1B03G0442700	c.2356-60_2356-59insTTGAAG
1B	261597162	429958447	29	0.868	0	-0.868	0.582	38	41	266126542	G	GAGGGCAGTAGCTCACACTGTGAGGGGCTTCAGCAACGGGGCCTATTATGCACATGATGGTGTGA	INDEL	splice_donor_variant&intron_variant	HIGH	TraesCS1B03G0447500LC.1	11	TraesCS1B03G0447500LC	c.1064+1_1064+2insAGGGCAGTAGCTCACACTGTGAGGGGCTTCAGCAACGGGGCCTATTATGCACATGATGGTGTGA
1B	261597162	429958447	29	0.868	0	-0.868	0.582	38	41	266126542	G	GAGGGCAGTAGCTCACACTGTGAGGGGCTTCAGCAACGGGGCCTATTATGCACATGATGGTGTGA	INDEL	downstream_gene_variant	MODIFIER	TraesCS1B03G0447600LC.1	-1	TraesCS1B03G0447600LC	c.*633_*634insAGGGCAGTAGCTCACACTGTGAGGGGCTTCAGCAACGGGGCCTATTATGCACATGATGGTGTGA
1B	261597162	429958447	29	0.955	0	-0.955	0.58	22	28	270885692	C	CATAAAGGTTGCCGTAATCATCT	INDEL	splice_acceptor_variant&intron_variant	HIGH	TraesCS1B03G0453000.2	12	TraesCS1B03G0453000	c.1915-2_1915-1insAGATGATTACGGCAACCTTTAT
1B	261597162	429958447	29	0.955	0	-0.955	0.58	22	28	270885692	C	CATAAAGGTTGCCGTAATCATCT	INDEL	splice_acceptor_variant&intron_variant	HIGH	TraesCS1B03G0453000.1	13	TraesCS1B03G0453000	c.1879-2_1879-1insAGATGATTACGGCAACCTTTAT
1B	261597162	429958447	29	0	0.952	0.952	0.54	45	42	288578615	C	CATTCTTACGCTGGATGTGATTGAACTCATCCTCATTCAAGACACGGCGTGGTGATCCATCATCAA	INDEL	splice_acceptor_variant&intron_variant	HIGH	TraesCS1B03G0477200.1	4	TraesCS1B03G0477200	c.433-1_433insTTGATGATGGATCACCACGCCGTGTCTTGAATGAGGATGAGTTCAATCACATCCAGCGTAAGAAT
1B	261597162	429958447	29	0	0.952	0.952	0.54	45	42	288578615	C	CATTCTTACGCTGGATGTGATTGAACTCATCCTCATTCAAGACACGGCGTGGTGATCCATCATCAA	INDEL	splice_acceptor_variant&intron_variant	HIGH	TraesCS1B03G0477200.2	4	TraesCS1B03G0477200	c.433-1_433insTTGATGATGGATCACCACGCCGTGTCTTGAATGAGGATGAGTTCAATCACATCCAGCGTAAGAAT
1B	261597162	429958447	29	0	0.979	0.979	0.586	64	47	288584626	TCTGTTGCATAAGAAGCACAACACAACACACCAATTCAAAAAAAGAAACAATTTTCTCACGATAAAGAGAAATGAATCAATTCGACCAATCAAAATTAACAAATTGGAGTGGGCAAGGAAAGGAGCTATTGGGGATTTAC	T	INDEL	splice_acceptor_variant&splice_donor_variant&splice_region_variant&intron_variant	HIGH	TraesCS1B03G0477200.1	1	TraesCS1B03G0477200	c.31+1_32-1del
1B	261597162	429958447	29	0	0.979	0.979	0.586	64	47	288584626	TCTGTTGCATAAGAAGCACAACACAACACACCAATTCAAAAAAAGAAACAATTTTCTCACGATAAAGAGAAATGAATCAATTCGACCAATCAAAATTAACAAATTGGAGTGGGCAAGGAAAGGAGCTATTGGGGATTTAC	T	INDEL	splice_acceptor_variant&splice_donor_variant&splice_region_variant&intron_variant	HIGH	TraesCS1B03G0477200.2	1	TraesCS1B03G0477200	c.31+1_32-1del
1B	261597162	429958447	29	0	0.979	0.979	0.586	64	47	288584626	TCTGTTGCATAAGAAGCACAACACAACACACCAATTCAAAAAAAGAAACAATTTTCTCACGATAAAGAGAAATGAATCAATTCGACCAATCAAAATTAACAAATTGGAGTGGGCAAGGAAAGGAGCTATTGGGGATTTAC	T	INDEL	upstream_gene_variant	MODIFIER	TraesCS1B03G0477300LC.1	-1	TraesCS1B03G0477300LC	c.-1802_-1664del
1B	261597162	429958447	29	0	0.962	0.962	0.528	27	26	305815383	G	GATTGAATGAAGCTGTTATGCATTTTGGAGAGAGCATCAA	INDEL	splice_donor_variant&intron_variant	HIGH	TraesCS1B03G0496900.1	1	TraesCS1B03G0496900	c.278_278+1insATTGAATGAAGCTGTTATGCATTTTGGAGAGAGCATCAA
1B	261597162	429958447	29	0	0.962	0.962	0.528	27	26	305815383	G	GATTGAATGAAGCTGTTATGCATTTTGGAGAGAGCATCAA	INDEL	downstream_gene_variant	MODIFIER	TraesCS1B03G0496800LC.1	-1	TraesCS1B03G0496800LC	c.*1739_*1740insATTGAATGAAGCTGTTATGCATTTTGGAGAGAGCATCAA
1B	261597162	429958447	29	0	0.962	0.962	0.528	27	26	305815383	G	GATTGAATGAAGCTGTTATGCATTTTGGAGAGAGCATCAA	INDEL	downstream_gene_variant	MODIFIER	TraesCS1B03G0497000.2	-1	TraesCS1B03G0497000	c.*3334_*3335insTTGATGCTCTCTCCAAAATGCATAACAGCTTCATTCAAT
1B	261597162	429958447	29	0	0.962	0.962	0.528	27	26	305815383	G	GATTGAATGAAGCTGTTATGCATTTTGGAGAGAGCATCAA	INDEL	downstream_gene_variant	MODIFIER	TraesCS1B03G0497000.1	-1	TraesCS1B03G0497000	c.*3334_*3335insTTGATGCTCTCTCCAAAATGCATAACAGCTTCATTCAAT
1B	261597162	429958447	29	0	0.962	0.962	0.528	27	26	305815383	G	GATTGAATGAAGCTGTTATGCATTTTGGAGAGAGCATCAA	INDEL	downstream_gene_variant	MODIFIER	TraesCS1B03G0497000.3	-1	TraesCS1B03G0497000	c.*3334_*3335insTTGATGCTCTCTCCAAAATGCATAACAGCTTCATTCAAT
1B	261597162	429958447	29	0	0.962	0.962	0.528	27	26	305815383	G	GATTGAATGAAGCTGTTATGCATTTTGGAGAGAGCATCAA	INDEL	downstream_gene_variant	MODIFIER	TraesCS1B03G0497000.4	-1	TraesCS1B03G0497000	c.*4401_*4402insTTGATGCTCTCTCCAAAATGCATAACAGCTTCATTCAAT
1B	261597162	429958447	29	0	0.962	0.962	0.528	27	26	305815383	G	GATTGAATGAAGCTGTTATGCATTTTGGAGAGAGCATCAA	INDEL	downstream_gene_variant	MODIFIER	TraesCS1B03G0497000.5	-1	TraesCS1B03G0497000	c.*4401_*4402insTTGATGCTCTCTCCAAAATGCATAACAGCTTCATTCAAT
1B	261597162	429958447	29	0	0.962	0.962	0.528	27	26	305815383	G	GATTGAATGAAGCTGTTATGCATTTTGGAGAGAGCATCAA	INDEL	downstream_gene_variant	MODIFIER	TraesCS1B03G0497000.6	-1	TraesCS1B03G0497000	c.*4401_*4402insTTGATGCTCTCTCCAAAATGCATAACAGCTTCATTCAAT
1B	261597162	429958447	29	0	0.907	0.907	0.382	55	118	321048563	CCCTACAAACCAGAAGACATAAGGCAATCAAGATTAAGATTAGCACTTCAAACTACTGCAATCTATCATTACCAATTAATAAAAAATAACAAACTAAAGTAAAATATCACAAATTGGTACAAAACAACAGTACTTATTTCATGAGAAAAATAAATAAAGAGAACATA	C	INDEL	frameshift_variant&splice_acceptor_variant&splice_donor_variant&splice_region_variant&intron_variant	HIGH	TraesCS1B03G0517800.1	18	TraesCS1B03G0517800	c.2475+2_2476del	p.Gly826fs
1B	261597162	429958447	29	0	0.958	0.958	0.474	79	96	348314507	AAGGTAAGAGTTATATTTGATCAAATGCTTGTTTGCCCTGTCCATACTCTTTTGACCTGCTTATCCCTTTTTGGTTGCTCAAATGTGCAGTATATCAATGAAGCCCTAATGCCCATGCTGTTTTTTTTTGTGTGC	A	INDEL	frameshift_variant&splice_donor_variant&splice_region_variant&intron_variant	HIGH	TraesCS1B03G0563600.1	2	TraesCS1B03G0563600	c.464_466-3del	p.Ser157fs
1B	261597162	429958447	29	0	1	1	0.261	24	68	361799048	G	GTGGTTTGTATTCGCCGCCTCCTCCAGATTTTCCACAGGCCTCGACGTCGTATTTCTCATGCATTGCGC	INDEL	splice_region_variant&intron_variant	LOW	TraesCS1B03G0581400.1	10	TraesCS1B03G0581400	c.1690-4_1690-3insGCGCAATGCATGAGAAATACGACGTCGAGGCCTGTGGAAAATCTGGAGGAGGCGGCGAATACAAACCA
1B	261597162	429958447	29	0	0.712	0.712	0.561	41	66	371792142	T	TTGCAATGAAGACAATTTTGAGCGTTTATGTGAAGCTTCGG	INDEL	splice_region_variant&intron_variant	LOW	TraesCS1B03G0593700.1	17	TraesCS1B03G0593700	c.1654-3_1654-2insCCGAAGCTTCACATAAACGCTCAAAATTGTCTTCATTGCA
1B	261597162	429958447	29	0	0.712	0.712	0.561	41	66	371792142	T	TTGCAATGAAGACAATTTTGAGCGTTTATGTGAAGCTTCGG	INDEL	upstream_gene_variant	MODIFIER	TraesCS1B03G0593500LC.1	-1	TraesCS1B03G0593500LC	c.-1493_-1492insCCGAAGCTTCACATAAACGCTCAAAATTGTCTTCATTGCA
1B	261597162	429958447	29	0	0.712	0.712	0.561	41	66	371792142	T	TTGCAATGAAGACAATTTTGAGCGTTTATGTGAAGCTTCGG	INDEL	downstream_gene_variant	MODIFIER	TraesCS1B03G0593600.1	-1	TraesCS1B03G0593600	c.*1531_*1532insTGCAATGAAGACAATTTTGAGCGTTTATGTGAAGCTTCGG
1B	261597162	429958447	29	0	0.786	0.786	0.656	36	28	386933670	C	CT	INDEL	splice_acceptor_variant&intron_variant	HIGH	TraesCS1B03G0613500.1	2	TraesCS1B03G0613500	c.520-2_520-1insA
1B	261597162	429958447	29	0	0.786	0.786	0.656	36	28	386933670	C	CT	INDEL	downstream_gene_variant	MODIFIER	TraesCS1B03G0613600.1	-1	TraesCS1B03G0613600	c.*2767_*2768insA
1B	261597162	429958447	29	0.75	0	-0.75	0.585	36	29	386933671	T	TTGTAAGTTTCTTCATACACG	INDEL	splice_region_variant&intron_variant	LOW	TraesCS1B03G0613500.1	2	TraesCS1B03G0613500	c.520-3_520-2insCGTGTATGAAGAAACTTACA
1B	261597162	429958447	29	0.75	0	-0.75	0.585	36	29	386933671	T	TTGTAAGTTTCTTCATACACG	INDEL	downstream_gene_variant	MODIFIER	TraesCS1B03G0613600.1	-1	TraesCS1B03G0613600	c.*2766_*2767insCGTGTATGAAGAAACTTACA
1B	261597162	429958447	29	0.805	0	-0.805	0.518	82	55	390332894	TCCTGAAAACAAGACGACCAACACAAGTTATCACCTAGGCTGGGAGACCAAAAACATCACAATGTTCTGAAAGACAAAAAATAAGCCATGTGTCAAGCTTTGCTTGTCACATAAAAGGGTTGGTTAGGTGTCATCAGAAATGTGGCTGA	T	INDEL	frameshift_variant&splice_acceptor_variant&splice_donor_variant&splice_region_variant&intron_variant	HIGH	TraesCS1B03G0617600.2	6	TraesCS1B03G0617600	c.606+2_607del	p.Glu203fs
1B	261597162	429958447	29	0.805	0	-0.805	0.518	82	55	390332894	TCCTGAAAACAAGACGACCAACACAAGTTATCACCTAGGCTGGGAGACCAAAAACATCACAATGTTCTGAAAGACAAAAAATAAGCCATGTGTCAAGCTTTGCTTGTCACATAAAAGGGTTGGTTAGGTGTCATCAGAAATGTGGCTGA	T	INDEL	frameshift_variant&splice_acceptor_variant&splice_donor_variant&splice_region_variant&intron_variant	HIGH	TraesCS1B03G0617600.1	5	TraesCS1B03G0617600	c.492+2_493del	p.Glu165fs
1B	261597162	429958447	29	0.805	0	-0.805	0.518	82	55	390332894	TCCTGAAAACAAGACGACCAACACAAGTTATCACCTAGGCTGGGAGACCAAAAACATCACAATGTTCTGAAAGACAAAAAATAAGCCATGTGTCAAGCTTTGCTTGTCACATAAAAGGGTTGGTTAGGTGTCATCAGAAATGTGGCTGA	T	INDEL	upstream_gene_variant	MODIFIER	TraesCS1B03G0617500.1	-1	TraesCS1B03G0617500	c.-1334_-1187del
1B	261597162	429958447	29	0.861	0	-0.861	0.53	36	30	402371679	G	GGATATGCATCTGAGCAGAAGTGCATGTCAGTGGAA	INDEL	splice_donor_variant&intron_variant	HIGH	TraesCS1B03G0635300.1	2	TraesCS1B03G0635300	c.325_325+1insGATATGCATCTGAGCAGAAGTGCATGTCAGTGGAA
1B	261597162	429958447	29	0.861	0	-0.861	0.53	36	30	402371679	G	GGATATGCATCTGAGCAGAAGTGCATGTCAGTGGAA	INDEL	downstream_gene_variant	MODIFIER	TraesCS1B03G0635400.1	-1	TraesCS1B03G0635400	c.*3837_*3838insTTCCACTGACATGCACTTCTGCTCAGATGCATATC
1B	261597162	429958447	29	0.91	0	-0.91	0.609	89	118	413553334	T	TCAATAGCAACCCTGTTAGCAAA	INDEL	splice_region_variant&intron_variant	LOW	TraesCS1B03G0654700LC.1	3	TraesCS1B03G0654700LC	c.580-3_580-2insTTTGCTAACAGGGTTGCTATTG
1B	261597162	429958447	29	0.91	0	-0.91	0.609	89	118	413553334	T	TCAATAGCAACCCTGTTAGCAAA	INDEL	downstream_gene_variant	MODIFIER	TraesCS1B03G0654600.1	-1	TraesCS1B03G0654600	c.*525_*526insCAATAGCAACCCTGTTAGCAAA
1B	261597162	429958447	29	0	0.966	0.966	0.659	53	29	416753905	T	TTTGGAGAAATTGCGCCGAGGATTA	INDEL	splice_region_variant&intron_variant	LOW	TraesCS1B03G0659500.2	61	TraesCS1B03G0659500	c.12249+2_12249+3insTTGGAGAAATTGCGCCGAGGATTA
1B	261597162	429958447	29	0	0.966	0.966	0.659	53	29	416753905	T	TTTGGAGAAATTGCGCCGAGGATTA	INDEL	splice_region_variant&intron_variant	LOW	TraesCS1B03G0659500.1	61	TraesCS1B03G0659500	c.12231+2_12231+3insTTGGAGAAATTGCGCCGAGGATTA
1B	261597162	429958447	29	0.73	0	-0.73	0.665	74	87	417501705	T	TTG	INDEL	frameshift_variant	HIGH	TraesCS1B03G0660100.2	5	TraesCS1B03G0660100	c.699_700insCA	p.Thr234fs
1B	261597162	429958447	29	0.73	0	-0.73	0.665	74	87	417501705	T	TTG	INDEL	splice_acceptor_variant&intron_variant	HIGH	TraesCS1B03G0660100.1	4	TraesCS1B03G0660100	c.695-1_695insCA
1B	261597162	429958447	29	0.75	0.171	-0.579	0.618	20	35	421660882	T	C	SNP	upstream_gene_variant	MODIFIER	TraesCS1B03G0665300LC.1	-1	TraesCS1B03G0665300LC	c.-2044A>G
1B	261597162	429958447	29	0.75	0.171	-0.579	0.618	20	35	421660882	T	C	SNP	upstream_gene_variant	MODIFIER	TraesCS1B03G0665400LC.1	-1	TraesCS1B03G0665400LC	c.-1098A>G
1B	261597162	429958447	29	0.75	0.171	-0.579	0.618	20	35	421660882	T	C	SNP	upstream_gene_variant	MODIFIER	TraesCS1B03G0665500LC.1	-1	TraesCS1B03G0665500LC	c.-137T>C
1B	261597162	429958447	29	0.75	0.171	-0.579	0.618	20	35	421660882	T	C	SNP	downstream_gene_variant	MODIFIER	TraesCS1B03G0665600.1	-1	TraesCS1B03G0665600	c.*203A>G
1B	261597162	429958447	29	0.75	0.171	-0.579	0.618	20	35	421660882	T	C	SNP	intergenic_region	MODIFIER	TraesCS1B03G0665400LC-TraesCS1B03G0665500LC	-1	TraesCS1B03G0665400LC-TraesCS1B03G0665500LC	n.421660882T>C
1B	261597162	429958447	29	0.976	0	-0.976	0.512	41	41	423335319	A	ATTCCGTGGACCGAGGAGGAGC	INDEL	splice_region_variant&intron_variant	LOW	TraesCS1B03G0667300.2	2	TraesCS1B03G0667300	c.262+3_262+4insTTCCGTGGACCGAGGAGGAGC
1B	261597162	429958447	29	0.976	0	-0.976	0.512	41	41	423335319	A	ATTCCGTGGACCGAGGAGGAGC	INDEL	splice_region_variant&intron_variant	LOW	TraesCS1B03G0667300.1	2	TraesCS1B03G0667300	c.262+3_262+4insTTCCGTGGACCGAGGAGGAGC
1B	261597162	429958447	29	0.981	0	-0.981	0.626	159	258	429958447	T	TTCTCCACGGTGCCAAACCGGATGGCAAACATCTCATCCTTAAGCTCTCCGTCAG	INDEL	splice_acceptor_variant&intron_variant	HIGH	TraesCS1B03G0678100.1	3	TraesCS1B03G0678100	c.458-1_458insCTGACGGAGAGCTTAAGGATGAGATGTTTGCCATCCGGTTTGGCACCGTGGAGA
1B	261597162	429958447	29	0.981	0	-0.981	0.626	159	258	429958447	T	TTCTCCACGGTGCCAAACCGGATGGCAAACATCTCATCCTTAAGCTCTCCGTCAG	INDEL	upstream_gene_variant	MODIFIER	TraesCS1B03G0678000LC.1	-1	TraesCS1B03G0678000LC	c.-3292_-3291insCTGACGGAGAGCTTAAGGATGAGATGTTTGCCATCCGGTTTGGCACCGTGGAGA
1B	305815382	451395516	53	0	0.962	0.962	0.528	27	26	305815383	G	GATTGAATGAAGCTGTTATGCATTTTGGAGAGAGCATCAA	INDEL	splice_donor_variant&intron_variant	HIGH	TraesCS1B03G0496900.1	1	TraesCS1B03G0496900	c.278_278+1insATTGAATGAAGCTGTTATGCATTTTGGAGAGAGCATCAA
1B	305815382	451395516	53	0	0.962	0.962	0.528	27	26	305815383	G	GATTGAATGAAGCTGTTATGCATTTTGGAGAGAGCATCAA	INDEL	downstream_gene_variant	MODIFIER	TraesCS1B03G0496800LC.1	-1	TraesCS1B03G0496800LC	c.*1739_*1740insATTGAATGAAGCTGTTATGCATTTTGGAGAGAGCATCAA
1B	305815382	451395516	53	0	0.962	0.962	0.528	27	26	305815383	G	GATTGAATGAAGCTGTTATGCATTTTGGAGAGAGCATCAA	INDEL	downstream_gene_variant	MODIFIER	TraesCS1B03G0497000.2	-1	TraesCS1B03G0497000	c.*3334_*3335insTTGATGCTCTCTCCAAAATGCATAACAGCTTCATTCAAT
1B	305815382	451395516	53	0	0.962	0.962	0.528	27	26	305815383	G	GATTGAATGAAGCTGTTATGCATTTTGGAGAGAGCATCAA	INDEL	downstream_gene_variant	MODIFIER	TraesCS1B03G0497000.1	-1	TraesCS1B03G0497000	c.*3334_*3335insTTGATGCTCTCTCCAAAATGCATAACAGCTTCATTCAAT
1B	305815382	451395516	53	0	0.962	0.962	0.528	27	26	305815383	G	GATTGAATGAAGCTGTTATGCATTTTGGAGAGAGCATCAA	INDEL	downstream_gene_variant	MODIFIER	TraesCS1B03G0497000.3	-1	TraesCS1B03G0497000	c.*3334_*3335insTTGATGCTCTCTCCAAAATGCATAACAGCTTCATTCAAT
1B	305815382	451395516	53	0	0.962	0.962	0.528	27	26	305815383	G	GATTGAATGAAGCTGTTATGCATTTTGGAGAGAGCATCAA	INDEL	downstream_gene_variant	MODIFIER	TraesCS1B03G0497000.4	-1	TraesCS1B03G0497000	c.*4401_*4402insTTGATGCTCTCTCCAAAATGCATAACAGCTTCATTCAAT
1B	305815382	451395516	53	0	0.962	0.962	0.528	27	26	305815383	G	GATTGAATGAAGCTGTTATGCATTTTGGAGAGAGCATCAA	INDEL	downstream_gene_variant	MODIFIER	TraesCS1B03G0497000.5	-1	TraesCS1B03G0497000	c.*4401_*4402insTTGATGCTCTCTCCAAAATGCATAACAGCTTCATTCAAT
1B	305815382	451395516	53	0	0.962	0.962	0.528	27	26	305815383	G	GATTGAATGAAGCTGTTATGCATTTTGGAGAGAGCATCAA	INDEL	downstream_gene_variant	MODIFIER	TraesCS1B03G0497000.6	-1	TraesCS1B03G0497000	c.*4401_*4402insTTGATGCTCTCTCCAAAATGCATAACAGCTTCATTCAAT
1B	305815382	451395516	53	0	0.907	0.907	0.382	55	118	321048563	CCCTACAAACCAGAAGACATAAGGCAATCAAGATTAAGATTAGCACTTCAAACTACTGCAATCTATCATTACCAATTAATAAAAAATAACAAACTAAAGTAAAATATCACAAATTGGTACAAAACAACAGTACTTATTTCATGAGAAAAATAAATAAAGAGAACATA	C	INDEL	frameshift_variant&splice_acceptor_variant&splice_donor_variant&splice_region_variant&intron_variant	HIGH	TraesCS1B03G0517800.1	18	TraesCS1B03G0517800	c.2475+2_2476del	p.Gly826fs
1B	305815382	451395516	53	0	0.958	0.958	0.474	79	96	348314507	AAGGTAAGAGTTATATTTGATCAAATGCTTGTTTGCCCTGTCCATACTCTTTTGACCTGCTTATCCCTTTTTGGTTGCTCAAATGTGCAGTATATCAATGAAGCCCTAATGCCCATGCTGTTTTTTTTTGTGTGC	A	INDEL	frameshift_variant&splice_donor_variant&splice_region_variant&intron_variant	HIGH	TraesCS1B03G0563600.1	2	TraesCS1B03G0563600	c.464_466-3del	p.Ser157fs
1B	305815382	451395516	53	0	1	1	0.261	24	68	361799048	G	GTGGTTTGTATTCGCCGCCTCCTCCAGATTTTCCACAGGCCTCGACGTCGTATTTCTCATGCATTGCGC	INDEL	splice_region_variant&intron_variant	LOW	TraesCS1B03G0581400.1	10	TraesCS1B03G0581400	c.1690-4_1690-3insGCGCAATGCATGAGAAATACGACGTCGAGGCCTGTGGAAAATCTGGAGGAGGCGGCGAATACAAACCA
1B	305815382	451395516	53	0	0.712	0.712	0.561	41	66	371792142	T	TTGCAATGAAGACAATTTTGAGCGTTTATGTGAAGCTTCGG	INDEL	splice_region_variant&intron_variant	LOW	TraesCS1B03G0593700.1	17	TraesCS1B03G0593700	c.1654-3_1654-2insCCGAAGCTTCACATAAACGCTCAAAATTGTCTTCATTGCA
1B	305815382	451395516	53	0	0.712	0.712	0.561	41	66	371792142	T	TTGCAATGAAGACAATTTTGAGCGTTTATGTGAAGCTTCGG	INDEL	upstream_gene_variant	MODIFIER	TraesCS1B03G0593500LC.1	-1	TraesCS1B03G0593500LC	c.-1493_-1492insCCGAAGCTTCACATAAACGCTCAAAATTGTCTTCATTGCA
1B	305815382	451395516	53	0	0.712	0.712	0.561	41	66	371792142	T	TTGCAATGAAGACAATTTTGAGCGTTTATGTGAAGCTTCGG	INDEL	downstream_gene_variant	MODIFIER	TraesCS1B03G0593600.1	-1	TraesCS1B03G0593600	c.*1531_*1532insTGCAATGAAGACAATTTTGAGCGTTTATGTGAAGCTTCGG
1B	305815382	451395516	53	0	0.786	0.786	0.656	36	28	386933670	C	CT	INDEL	splice_acceptor_variant&intron_variant	HIGH	TraesCS1B03G0613500.1	2	TraesCS1B03G0613500	c.520-2_520-1insA
1B	305815382	451395516	53	0	0.786	0.786	0.656	36	28	386933670	C	CT	INDEL	downstream_gene_variant	MODIFIER	TraesCS1B03G0613600.1	-1	TraesCS1B03G0613600	c.*2767_*2768insA
1B	305815382	451395516	53	0.75	0	-0.75	0.585	36	29	386933671	T	TTGTAAGTTTCTTCATACACG	INDEL	splice_region_variant&intron_variant	LOW	TraesCS1B03G0613500.1	2	TraesCS1B03G0613500	c.520-3_520-2insCGTGTATGAAGAAACTTACA
1B	305815382	451395516	53	0.75	0	-0.75	0.585	36	29	386933671	T	TTGTAAGTTTCTTCATACACG	INDEL	downstream_gene_variant	MODIFIER	TraesCS1B03G0613600.1	-1	TraesCS1B03G0613600	c.*2766_*2767insCGTGTATGAAGAAACTTACA
1B	305815382	451395516	53	0.805	0	-0.805	0.518	82	55	390332894	TCCTGAAAACAAGACGACCAACACAAGTTATCACCTAGGCTGGGAGACCAAAAACATCACAATGTTCTGAAAGACAAAAAATAAGCCATGTGTCAAGCTTTGCTTGTCACATAAAAGGGTTGGTTAGGTGTCATCAGAAATGTGGCTGA	T	INDEL	frameshift_variant&splice_acceptor_variant&splice_donor_variant&splice_region_variant&intron_variant	HIGH	TraesCS1B03G0617600.2	6	TraesCS1B03G0617600	c.606+2_607del	p.Glu203fs
1B	305815382	451395516	53	0.805	0	-0.805	0.518	82	55	390332894	TCCTGAAAACAAGACGACCAACACAAGTTATCACCTAGGCTGGGAGACCAAAAACATCACAATGTTCTGAAAGACAAAAAATAAGCCATGTGTCAAGCTTTGCTTGTCACATAAAAGGGTTGGTTAGGTGTCATCAGAAATGTGGCTGA	T	INDEL	frameshift_variant&splice_acceptor_variant&splice_donor_variant&splice_region_variant&intron_variant	HIGH	TraesCS1B03G0617600.1	5	TraesCS1B03G0617600	c.492+2_493del	p.Glu165fs
1B	305815382	451395516	53	0.805	0	-0.805	0.518	82	55	390332894	TCCTGAAAACAAGACGACCAACACAAGTTATCACCTAGGCTGGGAGACCAAAAACATCACAATGTTCTGAAAGACAAAAAATAAGCCATGTGTCAAGCTTTGCTTGTCACATAAAAGGGTTGGTTAGGTGTCATCAGAAATGTGGCTGA	T	INDEL	upstream_gene_variant	MODIFIER	TraesCS1B03G0617500.1	-1	TraesCS1B03G0617500	c.-1334_-1187del
1B	305815382	451395516	53	0.861	0	-0.861	0.53	36	30	402371679	G	GGATATGCATCTGAGCAGAAGTGCATGTCAGTGGAA	INDEL	splice_donor_variant&intron_variant	HIGH	TraesCS1B03G0635300.1	2	TraesCS1B03G0635300	c.325_325+1insGATATGCATCTGAGCAGAAGTGCATGTCAGTGGAA
1B	305815382	451395516	53	0.861	0	-0.861	0.53	36	30	402371679	G	GGATATGCATCTGAGCAGAAGTGCATGTCAGTGGAA	INDEL	downstream_gene_variant	MODIFIER	TraesCS1B03G0635400.1	-1	TraesCS1B03G0635400	c.*3837_*3838insTTCCACTGACATGCACTTCTGCTCAGATGCATATC
1B	305815382	451395516	53	0.91	0	-0.91	0.609	89	118	413553334	T	TCAATAGCAACCCTGTTAGCAAA	INDEL	splice_region_variant&intron_variant	LOW	TraesCS1B03G0654700LC.1	3	TraesCS1B03G0654700LC	c.580-3_580-2insTTTGCTAACAGGGTTGCTATTG
1B	305815382	451395516	53	0.91	0	-0.91	0.609	89	118	413553334	T	TCAATAGCAACCCTGTTAGCAAA	INDEL	downstream_gene_variant	MODIFIER	TraesCS1B03G0654600.1	-1	TraesCS1B03G0654600	c.*525_*526insCAATAGCAACCCTGTTAGCAAA
1B	305815382	451395516	53	0	0.966	0.966	0.659	53	29	416753905	T	TTTGGAGAAATTGCGCCGAGGATTA	INDEL	splice_region_variant&intron_variant	LOW	TraesCS1B03G0659500.2	61	TraesCS1B03G0659500	c.12249+2_12249+3insTTGGAGAAATTGCGCCGAGGATTA
1B	305815382	451395516	53	0	0.966	0.966	0.659	53	29	416753905	T	TTTGGAGAAATTGCGCCGAGGATTA	INDEL	splice_region_variant&intron_variant	LOW	TraesCS1B03G0659500.1	61	TraesCS1B03G0659500	c.12231+2_12231+3insTTGGAGAAATTGCGCCGAGGATTA
1B	305815382	451395516	53	0.73	0	-0.73	0.665	74	87	417501705	T	TTG	INDEL	frameshift_variant	HIGH	TraesCS1B03G0660100.2	5	TraesCS1B03G0660100	c.699_700insCA	p.Thr234fs
1B	305815382	451395516	53	0.73	0	-0.73	0.665	74	87	417501705	T	TTG	INDEL	splice_acceptor_variant&intron_variant	HIGH	TraesCS1B03G0660100.1	4	TraesCS1B03G0660100	c.695-1_695insCA
1B	305815382	451395516	53	0.75	0.171	-0.579	0.618	20	35	421660882	T	C	SNP	upstream_gene_variant	MODIFIER	TraesCS1B03G0665300LC.1	-1	TraesCS1B03G0665300LC	c.-2044A>G
1B	305815382	451395516	53	0.75	0.171	-0.579	0.618	20	35	421660882	T	C	SNP	upstream_gene_variant	MODIFIER	TraesCS1B03G0665400LC.1	-1	TraesCS1B03G0665400LC	c.-1098A>G
1B	305815382	451395516	53	0.75	0.171	-0.579	0.618	20	35	421660882	T	C	SNP	upstream_gene_variant	MODIFIER	TraesCS1B03G0665500LC.1	-1	TraesCS1B03G0665500LC	c.-137T>C
1B	305815382	451395516	53	0.75	0.171	-0.579	0.618	20	35	421660882	T	C	SNP	downstream_gene_variant	MODIFIER	TraesCS1B03G0665600.1	-1	TraesCS1B03G0665600	c.*203A>G
1B	305815382	451395516	53	0.75	0.171	-0.579	0.618	20	35	421660882	T	C	SNP	intergenic_region	MODIFIER	TraesCS1B03G0665400LC-TraesCS1B03G0665500LC	-1	TraesCS1B03G0665400LC-TraesCS1B03G0665500LC	n.421660882T>C
1B	305815382	451395516	53	0.976	0	-0.976	0.512	41	41	423335319	A	ATTCCGTGGACCGAGGAGGAGC	INDEL	splice_region_variant&intron_variant	LOW	TraesCS1B03G0667300.2	2	TraesCS1B03G0667300	c.262+3_262+4insTTCCGTGGACCGAGGAGGAGC
1B	305815382	451395516	53	0.976	0	-0.976	0.512	41	41	423335319	A	ATTCCGTGGACCGAGGAGGAGC	INDEL	splice_region_variant&intron_variant	LOW	TraesCS1B03G0667300.1	2	TraesCS1B03G0667300	c.262+3_262+4insTTCCGTGGACCGAGGAGGAGC
1B	305815382	451395516	53	0.981	0	-0.981	0.626	159	258	429958447	T	TTCTCCACGGTGCCAAACCGGATGGCAAACATCTCATCCTTAAGCTCTCCGTCAG	INDEL	splice_acceptor_variant&intron_variant	HIGH	TraesCS1B03G0678100.1	3	TraesCS1B03G0678100	c.458-1_458insCTGACGGAGAGCTTAAGGATGAGATGTTTGCCATCCGGTTTGGCACCGTGGAGA
1B	305815382	451395516	53	0.981	0	-0.981	0.626	159	258	429958447	T	TTCTCCACGGTGCCAAACCGGATGGCAAACATCTCATCCTTAAGCTCTCCGTCAG	INDEL	upstream_gene_variant	MODIFIER	TraesCS1B03G0678000LC.1	-1	TraesCS1B03G0678000LC	c.-3292_-3291insCTGACGGAGAGCTTAAGGATGAGATGTTTGCCATCCGGTTTGGCACCGTGGAGA
1B	305815382	451395516	53	0.838	0	-0.838	0.475	37	22	430420928	T	TCATTTTCTGATATAGCTCCTGAAGGAATAGGACGATAAGGCTCATTAATAGCGTCGATGTCTC	INDEL	splice_region_variant&intron_variant	LOW	TraesCS1B03G0679300.1	6	TraesCS1B03G0679300	c.517-3_517-2insGAGACATCGACGCTATTAATGAGCCTTATCGTCCTATTCCTTCAGGAGCTATATCAGAAAATG
1B	305815382	451395516	53	0.838	0	-0.838	0.475	37	22	430420928	T	TCATTTTCTGATATAGCTCCTGAAGGAATAGGACGATAAGGCTCATTAATAGCGTCGATGTCTC	INDEL	splice_region_variant&intron_variant	LOW	TraesCS1B03G0679300.2	6	TraesCS1B03G0679300	c.517-3_517-2insGAGACATCGACGCTATTAATGAGCCTTATCGTCCTATTCCTTCAGGAGCTATATCAGAAAATG
1B	305815382	451395516	53	0.985	0	-0.985	0.413	65	44	432379576	GCCTGAAATAGTTTTTCAACAGACTTGACATGAGAGAACTGCAGCGCAAAAGAAGGAAAATAACCTGGCAATAAAAGTAAACATCCCATGAATGTGAACTAGTATAAGAAATCTTTGCTTTAAATAGATGTTCAGTTCACTCA	G	INDEL	frameshift_variant&splice_acceptor_variant&splice_donor_variant&splice_region_variant&intron_variant	HIGH	TraesCS1B03G0681000.1	8	TraesCS1B03G0681000	c.1335+2_1336del	p.Ala446fs
1B	305815382	451395516	53	0.985	0	-0.985	0.413	65	44	432379576	GCCTGAAATAGTTTTTCAACAGACTTGACATGAGAGAACTGCAGCGCAAAAGAAGGAAAATAACCTGGCAATAAAAGTAAACATCCCATGAATGTGAACTAGTATAAGAAATCTTTGCTTTAAATAGATGTTCAGTTCACTCA	G	INDEL	splice_acceptor_variant&splice_donor_variant&conservative_inframe_deletion&splice_region_variant&intron_variant	HIGH	TraesCS1B03G0681000.2	8	TraesCS1B03G0681000	c.1335+2_1398del	p.Val446_Pro467del
[truncated: 50,601 more rows]
