# Supplementary material for: Identification and characterization of the powdery mildew resistance gene in spelt accession Lsy-93
Source: Research Square preprint supplement (doi:10.21203/rs.3.rs-6722793/v1), 2025-06-06
Supplement: Supplementary file 3 [file 8a69548444921da5ddb25ecb.xlsx]

## Sheet: Sheet1
Table S2 Primers for the mapping of PmLsy-93 and qRT-PCR of the six selected differentially expressed genes (DEGs)
Name	Forward primer (5′–3′)	Reverse primer (5′–3′)	Description	reference
L43177	GGAGAAGCCTGAGATGAATCA	GCAACCTAAAATTGACAACCA	located to PmLsy-93
CIT02g-20	CGTGCCTTCCATTGTTGTAT	TGTTCACACAAGCAGCAAGTT	located to PmLsy-93	[19]
L93-293	GCATACCTTCTCCTCTCACGA	GCTACCCATGTATACGCCGG	located to PmLsy-93
L11500	GCATACCTTCTCCTCTCACGA	CCCATGTATACGCCGGAGAG	located to PmLsy-93
S93-2	TGGCATGCTCACCATTTATT	GACCGAGGGAGGATACAGAA	located to PmLsy-93
S93-46	CAGAAGCAAGCATTTCAGTCA	CTGCCCGTAACACTCTGATG	located to PmLsy-93
L93-277	CACAGGCATACAAGACTACCA	AGGAGTTTGTCTTCCTCAAGC	located to PmLsy-93
CIT02g-4	TGACCCTAAAACAGTCTCAAAGA	TGTTGTAAATGAGAAGTGCACCT	located to PmLsy-93	[19]
L93-21	CCGGCATCCAGTGTGTTCTT	CGCTAGAGAGTGCCCTGATG	located to PmLsy-93
CINAU140	CACGGTGGAAGTCACTAACC	CAGTTTCCAAGGCATAGGG	located to PmLsy-93	[19]
L93-260	TCCTCTCCACTGTCCATGTTTG	TGATCTCACCCCTCAGTTCC	located to PmLsy-93
LQ-1	ACTACATGGGCGTGTTCAGG	GCATTTCAGTGCCTTGGTTC	qRT-PCR for TraesCS2B03G1285300
LQ-2	AGTAGCATTTCGCACCATA	CAAGACAAGCACCACCAGA	qRT-PCR for TraesCS2B03G1276100
LQ-3	AGCAGAATACGAGGGCAGGTC	CCAGCACAGGCATTGGGTC	qRT-PCR for TraesCS2B03G1276200
LQ-4	ATGACATTCACCGTCTCCC	TTCAGCGGCATCACAGTAG	qRT-PCR for TraesCS2B03G1283800
LQ-5	TTATTACCCAACCGACACCA	GTCCCATTCCAGATGAAGACC	qRT-PCR for TraesCS2B03G1284900
LQ-6	ACCACCCGTCGGACACCTTG	CGGGACGCCGTTGAAGTAGAG	qRT-PCR for TraesCS2B03G1290400
