# Supplementary material for: Identification and characterization of the powdery mildew resistance gene in spelt accession Lsy-93
Source: Research Square preprint supplement (doi:10.21203/rs.3.rs-6722793/v1), 2025-06-06
Supplement: Supplementary file 4 [file c6b4cf28869648a1f8640f2e.xlsx]

## Sheet: UP
Table S3 Differentially expressed genes (DEGs) between the resistant and susceptible bulks of Lsy-93 × Tainong 18 (TN18).
Gene_ID	Locus	gene_name	gene_description	23zj93R	23zj93S	logFC	PValue	FDR
TraesCS2B03G1238800	2B:698067008-698075448|-	--	Glycosyl transferase, family 1||Carbohydrate binding module family 25||Bacterial/plant glycogen synthase||Starch synthase, catalytic domain||Immunoglobulin-like fold	542.374874761881	87.7248625242354	2.59395	0.000263466039123454	0.0274754498031949
TraesCS2D03G0432500	2D:162970316-162972253|+	--	--	231.730170054353	31.6934822236107	2.83278	0.000139040617228809	0.0167149504515354
TraesCS2D03G1065400LC	2D:581936069-581941839|-	--	--	78.2487936692436	9.85429105903861	2.94104	0.000387624347657913	0.0365280505507327
TraesCS7A03G0007400	7A:1757255-1763142|-	--	Presenilin/signal peptide peptidase||Peptidase A22B, signal peptide peptidase	251.782849480158	29.5805834087033	3.05159	4.85455281474107e-05	0.00730812928250749
TraesCS7D03G0009100LC	7D:2516087-2519437|+	--	--	99.3895204627702	7.39514585217584	3.69382	2.30063563264416e-05	0.00404027361003394
TraesCS2B03G0772000LC	2B:421326068-421326583|+	--	--	36.9114726970952	1.05644940745369	4.93982	3.88700910579674e-05	0.00612462226262455
TraesCS2B03G1346200LC	2B:741116445-741116864|+	--	--	19.3796191477979	0.101659917379646	6.40534	0.00039082463999038	0.0365280505507327
TraesCS3B03G0227800	3B:77912823-77914879|-	--	Cytochrome P450||Cytochrome P450, E-class, group I||Cytochrome P450 superfamily	18.9529133883835	0	7.24078	0.00039082463999038	0.0365280505507327
TraesCS2B03G1474600	2B:784535443-784539069|+	--	P-loop containing nucleoside triphosphate hydrolase||Leucine-rich repeat domain superfamily||Winged helix-like DNA-binding domain superfamily||Virus X resistance protein-like, coiled-coil domain||Rx, N-terminal	142.931596094079	0	10.1473193024358	7.61990971328083e-11	1.25474513278691e-07
TraesCS3B03G1282200LC	3B:774939565-774939729|-	--	--	145.173956279206	0	10.1697574448749	6.71092252866998e-11	1.13304157832152e-07
TraesCS6B03G0584300LC	6B:304686427-304686735|-	--	--	153.521456932479	0	10.2503469873876	4.1007717356136e-11	7.64980327407191e-08
TraesCS2D03G1325200	2D:651795164-651798066|+	--	Leucine-rich repeat domain superfamily	159.023232740432	0	10.3011032540222	2.87788068694437e-11	5.72913023917374e-08
TraesCS5B03G1108600LC	5B:627101526-627103205|-	--	--	160.257910919576	0	10.3122524658644	2.71620199666661e-11	5.44792514759988e-08
TraesCSU03G0017600	Un:18225129-18229206|-	--	Protein of unknown function DUF247, plant	177.954569971436	0	10.4632530296116	1.06636414130956e-11	2.37052748613116e-08
TraesCS1B03G0543000LC	1B:336463163-336468868|+	--	--	179.549325578184	0	10.4761152042469	9.60589390941403e-12	2.20902436144421e-08
TraesCSU03G0405300	Un:261009360-261011464|-	--	--	181.257663331473	0	10.4897674157535	8.66241871959038e-12	2.04494408640525e-08
TraesCS5B03G1157200	5B:647694039-647699002|-	--	NB-ARC||P-loop containing nucleoside triphosphate hydrolase||Leucine-rich repeat domain superfamily||Winged helix-like DNA-binding domain superfamily||Virus X resistance protein-like, coiled-coil domain||Rx, N-terminal||Apoptotic protease-activating factors, helical domain	181.858856167623	0	10.4945412912245	8.66241871959038e-12	2.04494408640525e-08
TraesCS2B03G1241100LC	2B:698826988-698828044|+	--	--	206.351575817942	0	10.6767078631654	2.70534380875278e-12	8.20088084571469e-09
TraesCS1A03G0387400LC	1A:250940422-250940748|-	--	--	222.764210299901	0	10.7870559335051	1.2787202118164e-12	4.64556367909631e-09
TraesCS3B03G1485200	3B:837301071-837301934|+	--	SANT/Myb domain||Myb domain, plants||Homeobox-like domain superfamily||Myb domain	248.533314946813	0	10.9448930614539	4.66174302170549e-13	1.97391518804787e-09
TraesCS1A03G0863800	1A:538124787-538131562|+	--	Btz domain	410.849966586907	0.00204079486510714	11.6460979459352	3.78866873402256e-15	2.99372661684862e-11
TraesCS2B03G1564000LC	2B:809987150-809987476|+	--	--	490.321634282999	0	11.9248212816309	6.93551096382172e-16	8.21673175884421e-12
TraesCS4D03G0410500LC	4D:282397769-282398716|+	--	--	562.028954655127	0	12.1216899771448	1.83594700078759e-16	3.06197956064967e-12
TraesCS3B03G0167800	3B:54181586-54183535|-	--	Pentapeptide repeat||Thylakoid lumenal 15kDa protein 1-like	651.186533354028	0	12.3340720603484	4.37366087496171e-17	1.16671777500479e-12
TraesCS2A03G1039900	2A:692743641-692746727|+	--	Haem peroxidase||Class I peroxidase||Haem peroxidase superfamily	3498.91322091244	660.54519612733	2.37237208963028	0.000575852105924832	0.0490310589775002
TraesCS2D03G0636000LC	2D:345692626-345701036|-	--	--	3210.30690907754	603.410773303297	2.37867243275322	0.000560166900132949	0.0480637254034949
TraesCS6D03G0039000	6D:8455686-8457468|-	--	O-methyltransferase domain||Plant methyltransferase dimerisation||O-methyltransferase COMT-type||S-adenosyl-L-methionine-dependent methyltransferase||Winged helix-like DNA-binding domain superfamily||Winged helix DNA-binding domain superfamily	3478.64679104316	652.885733806381	2.38081531009224	0.000551241371050671	0.0473893484181363
TraesCS2D03G1241700LC	2D:633525037-633526458|+	--	--	1076.71924208517	198.817367707775	2.40381251278799	0.000548292282926058	0.0471619797706692
TraesCS2A03G0909100	2A:620940452-620945843|-	--	ABC transporter-like||AAA+ ATPase domain||ABC-2 type transporter||ABC transporter-like, conserved site||P-loop containing nucleoside triphosphate hydrolase||ABC transporter family G domain	1351.24309527183	248.331	2.41078169688382	0.000514369012245193	0.0453297250434515
TraesCS2D03G0875000	2D:490419840-490425792|-	--	Elongation factor EFG, domain V-like||Translational (tr)-type GTP-binding domain||Translation elongation factor EFTu-like, domain 2||Translation elongation factor EFG/EF2||Small GTP-binding protein domain||Translation elongation factor EFG/EF2, domain IV||Translation protein, beta-barrel domain superfamily||Elongation factor G, domain III||Ribosomal protein S5 domain 2-type fold, subgroup||Riboso…	5531.56514118373	1016.63582191115	2.4111543811153	0.000465367865097319	0.0419822562371866
TraesCS2B03G0722200LC	2B:393292684-393295950|-	--	--	679.635006593038	124.661030079536	2.41300254246171	0.000574362722188897	0.0489511181377349
TraesCS3D03G0352200LC	3D:135889248-135893544|-	--	--	590.227133389364	107.757839560276	2.4195472411291	0.000577757578677944	0.0491478242405698
TraesCSU03G0501800LC	Un:305055235-305055606|-	--	--	1017.57329895378	183.586447393208	2.43722297657424	0.000479974506477593	0.043154027417581
TraesCS1A03G1023000	1A:579898272-579898901|-	--	SANT/Myb domain||Homeobox-like domain superfamily	360.557822018752	64.4434138546751	2.44928391168754	0.000584888556394353	0.0496894494597954
TraesCS1B03G0190500	1B:63890129-63893876|+	--	Tetrapyrrole biosynthesis, glutamyl-tRNA reductase||Quinate/shikimate 5-dehydrogenase/glutamyl-tRNA reductase||Tetrapyrrole biosynthesis, glutamyl-tRNA reductase, N-terminal||Tetrapyrrole biosynthesis, glutamyl-tRNA reductase, dimerisation domain||Glutamyl-tRNA reductase, conserved site||NAD(P)-binding domain superfamily||Glutamyl-tRNA reductase, N-terminal domain superfamily||Glutamyl tRNA-reduc…	1402.15653721638	250.639284495613	2.45079475586253	0.000427981574778951	0.0391792604282886
TraesCS6A03G0362800	6A:138154103-138157184|+	--	--	910.597320811284	162.693208747868	2.4511775450253	0.000458256877530234	0.0414730462515384
TraesCS7D03G0207300	7D:55930066-55931881|+	--	CRAL-TRIO lipid binding domain||CRAL/TRIO, N-terminal domain||CRAL/TRIO, N-terminal domain superfamily||CRAL-TRIO lipid binding domain superfamily	426.574260145738	76.0643573366658	2.45300549393943	0.000553060663288412	0.0475151248112131
TraesCS2B03G0722400LC	2B:393297264-393298458|-	--	--	564.153849483914	100.362693708101	2.45682811096739	0.000508597394991097	0.0448803973165151
TraesCS2A03G0613000	2A:391248689-391251857|-	--	Aldo/keto reductase, conserved site||NADP-dependent oxidoreductase domain||NADP-dependent oxidoreductase domain superfamily	7284.95116759531	1286.84696274261	2.46837724294939	0.000347853723350601	0.0338168583239819
TraesCS7B03G0602800LC	7B:396254499-396254801|-	--	--	1280.70496367741	225.023723787636	2.47555248203235	0.000383047566920257	0.0365280505507327
TraesCS5A03G1156100	5A:663875078-663878941|+	--	S-adenosyl-L-methionine-dependent methyltransferase	303.791124700274	52.9814182437988	2.48417770340289	0.00057777619140211	0.0491478242405698
TraesCS2D03G0397900	2D:137281094-137282976|+	--	Protein of unknown function DUF3082	391.751957436588	67.7963306964524	2.49591559381453	0.000482786820546272	0.0432756089546114
TraesCS6B03G0051600	6B:17119363-17121035|-	--	O-methyltransferase domain||Plant methyltransferase dimerisation||O-methyltransferase COMT-type||S-adenosyl-L-methionine-dependent methyltransferase||Winged helix-like DNA-binding domain superfamily||Winged helix DNA-binding domain superfamily	2931.50399537474	505.329360065208	2.50346685237552	0.000304241204007312	0.0303172893466532
TraesCS4A03G1030500LC	4A:689722836-689727625|+	--	--	328.982980853507	56.6039674953761	2.50386279865785	0.000468916733495973	0.0422310019673821
TraesCS6D03G0673100LC	6D:411985248-411986294|+	--	--	879.360614380128	151.072265265878	2.50765749277528	0.000348086249668191	0.033827135869394
TraesCS2B03G1135300	2B:647054289-647058895|-	--	Protein kinase domain||Serine-threonine/tyrosine-protein kinase, catalytic domain||Serine/threonine-protein kinase, active site||Protein kinase-like domain superfamily||Protein kinase, ATP binding site	273.087459113338	46.6066108876251	2.51502203313018	0.00050639321724444	0.0447450992487999
TraesCS2A03G0131800	2A:34588132-34589350|-	--	Ribulose bisphosphate carboxylase small chain, domain||Ribulose-1,5-bisphosphate carboxylase small subunit, N-terminal||Ribulose bisphosphate carboxylase, small chain||Ribulose bisphosphate carboxylase, small subunit superfamily	7217.36331116614	1230.91826643893	2.51902929641559	0.000269538758580139	0.0280211064843484
TraesCS2B03G0786300LC	2B:431331509-431332003|-	--	--	274.592523387622	46.7059811643735	2.51988305824568	0.000480834427120758	0.043157613222632
TraesCS4D03G0726500	4D:477247655-477249711|-	--	Short-chain dehydrogenase/reductase SDR||Short-chain dehydrogenase/reductase, conserved site||NAD(P)-binding domain superfamily	750.534988461848	127.830378301897	2.51995157980531	0.000333235689223658	0.0326936198813177
TraesCS6D03G0847600	6D:476601595-476603802|+	--	SWEET sugar transporter	6688.63605785922	1138.71367414196	2.52158969222093	0.00026650665312183	0.0277491470674393
TraesCS5A03G1242500	5A:692057042-692059769|-	--	Nucleoside phosphatase GDA1/CD39	380.971631390553	64.5722102488703	2.5258348164071	0.000398165601192446	0.0370990764142846
TraesCS5B03G0127200	5B:56381632-56385526|+	--	Amine oxidase||Protoporphyrinogen oxidase||FAD/NAD(P)-binding domain superfamily	776.141838526993	131.560749536932	2.52688560104807	0.000321544078867806	0.0316747040172733
TraesCS5B03G0295000LC	5B:172372013-172404633|+	--	--	700.459477547142	118.612439017792	2.52821852614289	0.000329850422529691	0.032409170797061
TraesCS4B03G0764600LC	4B:574696297-574696914|-	--	--	289.649459634359	48.9792745965342	2.52847650898998	0.000491000018945867	0.0437326093669448
TraesCS5D03G0124600LC	5D:47112209-47112517|-	--	--	200.40592173459	33.8063810385181	2.53062378033996	0.000576737408096085	0.049090769299206
TraesCSU03G0255600LC	Un:201127190-201129588|+	--	--	327.762502657065	55.3145546637111	2.53167364793932	0.000436186612378246	0.0398287915505466
TraesCS4D03G0460300	4D:323702129-323721947|+	--	WD40 repeat||WD40/YVTN repeat-like-containing domain superfamily||WD40 repeat, conserved site||G-protein beta WD-40 repeat||WD40-repeat-containing domain superfamily	244.303277079866	41.2015268906939	2.53174806990819	0.000532659704508899	0.0460889726807635
TraesCS2B03G0306500LC	2B:100724492-100726941|+	--	--	363.667641833855	61.3631420836062	2.53219176703176	0.000403967448181773	0.0375412977036515
TraesCS3B03G0141200	3B:43970516-43971253|-	--	Plant lipid transfer protein/Par allergen||Bifunctional inhibitor/plant lipid transfer protein/seed storage helical domain||Bifunctional inhibitor/plant lipid transfer protein/seed storage helical domain superfamily	648.386951545445	109.214821636415	2.53575057714636	0.000337145197472508	0.0329197850943507
TraesCS1B03G0798800	1B:504948207-504958265|-	--	HhH-GPD domain||Endonuclease III-like, iron-sulphur cluster loop motif||DNA glycosylase||Helix-hairpin-helix, base-excision DNA repair, C-terminal||Demeter, RRM-fold domain	202.348387631655	33.9169545442814	2.53983732905173	0.000537901355455846	0.0463770412351007
TraesCS4B03G0010400	4B:4694467-4701478|+	--	--	1931.94296442394	324.329968088283	2.54147568870061	0.000260929913878346	0.0272322628427964
TraesCS5D03G0512700	5D:331424647-331426244|-	--	Chlorophyll A-B binding protein, plant and chromista||Chlorophyll A-B binding protein||Chlorophyll a/b binding domain superfamily	1501.39226963744	251.875022114952	2.54234769377419	0.000268593549229516	0.0279337291198696
TraesCS3D03G0685400LC	3D:415529361-415531270|+	--	--	432.027855609219	72.2823000307822	2.54478351681202	0.000356052783033222	0.034513314099543
TraesCS2B03G1120900	2B:640769167-640774527|+	--	Potassium transporter	349.895350668824	58.4000235302845	2.54777098202056	0.000385757185754208	0.0365280505507327
TraesCS1A03G0514700	1A:348865068-348867318|-	--	Mitochondrial substrate/solute carrier||Mitochondrial carrier domain superfamily	1004.17772257817	167.743107347446	2.54822186983601	0.000280435058491543	0.0288883723539096
TraesCS1D03G0127000	1D:41457802-41461684|+	--	Tetrapyrrole biosynthesis, glutamyl-tRNA reductase||Quinate/shikimate 5-dehydrogenase/glutamyl-tRNA reductase||Tetrapyrrole biosynthesis, glutamyl-tRNA reductase, N-terminal||Tetrapyrrole biosynthesis, glutamyl-tRNA reductase, dimerisation domain||Glutamyl-tRNA reductase, conserved site||NAD(P)-binding domain superfamily||Glutamyl-tRNA reductase, N-terminal domain superfamily||Glutamyl tRNA-reduc…	1754.98286628937	292.897494833389	2.54989726243555	0.000250419859126869	0.0262689742904772
TraesCS5A03G1195900	5A:675066119-675072412|+	--	Sugar/inositol transporter||Major facilitator, sugar transporter-like||Sugar transporter, conserved site||Major facilitator superfamily domain||MFS transporter superfamily	704.831995170749	116.940122220946	2.55765862053421	0.000281401479180106	0.0289609022322859
TraesCS1D03G0340400	1D:183193889-183194320|+	--	NADH:ubiquinone oxidoreductase-like, 20kDa subunit||NADH-ubiquinone oxidoreductase, 20 Kd subunit	390.228076019972	64.4165364608623	2.56393316795535	0.000336384146516654	0.0328575008878735
TraesCS4A03G0237700LC	4A:140559872-140562941|+	--	--	245.555579939513	40.4350343321663	2.56613101795475	0.000444258633403149	0.0403954834864827
TraesCS2B03G0378900	2B:135033828-135035131|-	--	GNAT domain||Acyl-CoA N-acyltransferase	203.476479887094	33.4838239210291	2.56632776202292	0.000519563545238845	0.0456969242756064
TraesCS5B03G0588000LC	5B:401388595-401390509|-	--	--	217.291899974828	35.6566356713444	2.57065964248221	0.000462804073155073	0.0417933698560756
TraesCS2A03G1112700	2A:719184349-719188456|+	--	Leucine-rich repeat domain superfamily	5364.19440440494	877.909457594017	2.57846044429528	0.000202593741096478	0.0224155563562408
TraesCS1A03G0896400LC	1A:548988783-548989967|-	--	--	516.305535564154	84.2790051482172	2.58063446131173	0.000275117628209076	0.0284789982541921
TraesCS2D03G1258600	2D:638317211-638320311|-	--	Protein kinase domain||Serine/threonine-protein kinase, active site||Protein kinase-like domain superfamily||Protein kinase, ATP binding site	233.593356577855	38.0321786683329	2.58222670948884	0.000462189578647821	0.0417520121910236
TraesCS2D03G0824100	2D:463827005-463827501|+	--	--	153.495687217369	24.9439443426566	2.58291815595737	0.00056433190591804	0.0483778980079318
TraesCS5B03G0815100	5B:510774102-510775389|+	--	Chlorophyll A-B binding protein, plant and chromista||Chlorophyll A-B binding protein||Chlorophyll a/b binding domain superfamily	3731.44124855164	606.982237047086	2.58717415146696	0.000196998292399314	0.0219168854982555
TraesCS2D03G0799200	2D:449271021-449273896|-	--	HAD hydrolase, subfamily IA||Phosphoglycolate phosphatase-like, domain 2||HAD superfamily||HAD-like superfamily||Haloacid dehalogenase-like hydrolase	1203.39397833497	195.621580007892	2.58762530278781	0.000221387892938207	0.0239362992122229
TraesCS1B03G0985600	1B:597386548-597387316|-	--	--	226.334654006224	36.6235794583946	2.59097837538328	0.000411912402660905	0.0379819400393443
TraesCS5B03G0014800	5B:7755553-7759308|-	--	Lipoxygenase||PLAT/LH2 domain||Lipoxygenase, plant||Lipoxygenase, C-terminal||Lipoxygenase, iron binding site||Lipoxygenase, conserved site||Lipoxygenase, domain 3||Lipoxigenase, C-terminal domain superfamily||PLAT/LH2 domain superfamily||Plant lipoxygenase, PLAT/LH2 domain	417.691788619191	67.6127620770362	2.59228954853281	0.000309250770486026	0.0306220250686163
TraesCS7A03G0642100	7A:293362059-293363229|+	--	Chlorophyll A-B binding protein, plant and chromista||Chlorophyll A-B binding protein||Chlorophyll a/b binding domain superfamily	11340.8703186665	1837.90142723374	2.59273101319183	0.000183521903440058	0.0207882390495414
TraesCS2A03G0749400	2A:520192152-520193065|+	--	ABA/WDS induced protein	1885.78822462757	305.161106907766	2.59444994856678	0.000201743303869366	0.0223307235436482
TraesCS3A03G0855700LC	3A:608459569-608460782|+	--	--	243.267683418399	39.0886280757866	2.60133884920334	0.000402532117149108	0.0374666669820991
TraesCS2D03G1111000	2D:596738381-596745434|+	--	Ankyrin repeat||Tetratricopeptide-like helical domain superfamily||Tetratricopeptide repeat||Ankyrin repeat-containing domain||Ankyrin repeat-containing domain superfamily	353.310877394347	56.6533296234363	2.60549509988013	0.000282428624964331	0.0290442020028855
TraesCS7D03G0669200LC	7D:315469739-315474191|+	--	--	167.196858594033	26.6652006552505	2.61036036432755	0.000484226246991256	0.0433900549705702
TraesCS3B03G0967100	3B:622396684-622401325|+	--	Cytochrome b245, heavy chain||FAD-binding 8||Ferric reductase, NAD binding domain||Ferric reductase transmembrane component-like domain||FAD-binding domain, ferredoxin reductase-type||Riboflavin synthase-like beta-barrel||Ferredoxin-NADP reductase (FNR), nucleotide-binding domain||EF-hand domain||EF-hand domain pair||NADPH oxidase Respiratory burst||EF-Hand 1, calcium-binding site	155.829409670962	24.7245962936247	2.61734951464458	0.000515658643368487	0.045413370652023
TraesCS4B03G0158300LC	4B:69199547-69208023|+	--	--	206.677141842178	32.7821750256451	2.61927012701609	0.00037605490793248	0.0360802659636653
TraesCS2A03G0116200LC	2A:29686704-29687827|+	--	--	126.839959447726	20.0725387416201	2.61972327748575	0.000565508694127277	0.0484597170720824
TraesCS7B03G0628700LC	7B:420046070-420046489|-	--	--	1405.8960526381	223.363457622943	2.6207696564636	0.000182749351839923	0.0207183243080399
TraesCS2D03G0129300	2D:29874664-29876166|-	--	Ribulose bisphosphate carboxylase small chain, domain||Ribulose-1,5-bisphosphate carboxylase small subunit, N-terminal||Ribulose bisphosphate carboxylase, small chain||Ribulose bisphosphate carboxylase, small subunit superfamily	7933.9048300961	1254.44160943745	2.62827859194945	0.000153678722795881	0.0182039680697288
TraesCS4B03G0780900	4B:581881279-581886600|+	--	Very-long-chain 3-ketoacyl-CoA synthase||FAE1/Type III polyketide synthase-like protein||3-Oxoacyl-[acyl-carrier-protein (ACP)] synthase III, C-terminal||Thiolase-like	1432.82181581681	226.239698764584	2.62968769908755	0.000174372276651347	0.0199466331558805
TraesCS2B03G0376800LC	2B:133118062-133121190|+	--	--	1042.41551304667	164.429442742871	2.63089453318618	0.000179485662072367	0.0204351665447821
TraesCS6A03G0034200	6A:8972166-8973845|+	--	Chalcone/stilbene synthase, N-terminal||Polyketide synthase, type III||Chalcone/stilbene synthase, C-terminal||Thiolase-like	3700.32730457137	582.103623506984	2.63546025140335	0.000154296073236031	0.0182689837978001
TraesCS1A03G0801700LC	1A:515278479-515282000|-	--	--	288.109190294187	45.1274070357482	2.63864584687718	0.000300228850186032	0.0299622327256363
TraesCS5A03G1209700LC	5A:681877769-681881404|+	--	--	475.033565280806	74.2628745221074	2.64271730413834	0.000213627364499398	0.0234326191751056
TraesCS4B03G0010300LC	4B:4684684-4685038|+	--	--	258.412753203202	40.1450774832403	2.6500728820321	0.000306865265796483	0.0304196872180861
TraesCS4B03G0177600	4B:78586389-78587374|-	--	Zinc finger C2H2-type||Zinc finger C2H2 superfamily	251.786785172351	39.0886280757866	2.65097143708281	0.000319162163010324	0.0315215470583614
TraesCS1B03G1239100	1B:683355493-683358323|-	--	Nuclease associated modular domain 3	128.725504588864	19.9164812682109	2.65218217292806	0.000535693858839742	0.0462315411789355
TraesCS3A03G0020000	3A:8630226-8631203|+	--	NB-ARC||P-loop containing nucleoside triphosphate hydrolase||Virus X resistance protein-like, coiled-coil domain||Rx, N-terminal	313.313631173113	48.5966727428698	2.65301397778645	0.000248163697215848	0.026063050342244
TraesCS2D03G0128800	2D:29832974-29834398|-	--	Ribulose bisphosphate carboxylase small chain, domain||Ribulose-1,5-bisphosphate carboxylase small subunit, N-terminal||Ribulose bisphosphate carboxylase, small chain||Ribulose bisphosphate carboxylase, small subunit superfamily	12162.6537514028	1885.29246779489	2.65693008957948	0.000131445079708788	0.0159455613747686
TraesCS1A03G0586100LC	1A:396079783-396080106|+	--	--	212.030976987243	32.7499316310644	2.65755848076819	0.000316957309004046	0.0313153821295998
TraesCS5B03G1377300	5B:713598715-713602809|+	--	NB-ARC||P-loop containing nucleoside triphosphate hydrolase||Leucine-rich repeat domain superfamily||Winged helix-like DNA-binding domain superfamily||Apoptotic protease-activating factors, helical domain	542.261690056506	83.7675335405931	2.66015099509485	0.00019403232567753	0.021684148805085
TraesCS2B03G0048400	2B:12864616-12866219|+	--	PLAC8 motif-containing protein	194.039510151437	29.8788	2.66156371753078	0.000330916026868968	0.0325018996051421
TraesCS6B03G0906900	6B:573112140-573113472|-	--	Zinc finger, Dof-type	761.991041445146	117.489926555169	2.66337392612237	0.00016767091811676	0.0192875783168723
TraesCS4B03G0369600LC	4B:231733450-231733797|-	--	--	124.000258863075	19.0160893341664	2.66460307470489	0.000499733724225718	0.0442886937788879
TraesCS6D03G0616500LC	6D:382207815-382208384|-	--	--	140.660333330751	21.5418289236412	2.66747202548808	0.000496309370169879	0.0441465447104091
TraesCS2D03G0128700	2D:29826706-29827646|-	--	Ribulose bisphosphate carboxylase small chain, domain||Ribulose-1,5-bisphosphate carboxylase small subunit, N-terminal||Ribulose bisphosphate carboxylase, small chain||Ribulose bisphosphate carboxylase, small subunit superfamily	4451.6	684.874490944164	2.66760620778732	0.000129368629946871	0.0157366054375865
TraesCS2D03G0163200	2D:37928009-37931152|-	--	Fatty acid desaturase domain||Fatty acid desaturase, N-terminal	1545.62073048694	236.789294980525	2.67328883483731	0.000139296787145373	0.016730666789239
TraesCS2A03G1013500	2A:682272273-682274685|+	--	Zinc/iron permease||Zinc/iron permease, fungal/plant	117.298957299469	17.8527173975951	2.67500513732014	0.000552264089800721	0.0474619744185697
TraesCS1B03G0883800LC	1B:553985015-553986275|-	--	--	197.221473303184	30.0359179355047	2.67747864683726	0.00036319231889078	0.0350652128075659
TraesCS1A03G0737500LC	1A:492067550-492068077|+	--	--	285.534855107532	43.3144257056013	2.68469445438225	0.000236016118960936	0.0251035326531178
TraesCS5B03G0837900	5B:520932027-520934816|+	--	Protein kinase domain||Serine-threonine/tyrosine-protein kinase, catalytic domain||Leucine-rich repeat||Leucine-rich repeat, typical subtype||Tyrosine-protein kinase, active site||Protein kinase-like domain superfamily||Protein kinase, ATP binding site||Leucine-rich repeat domain superfamily	209.745571652389	31.6934822236107	2.68905844031555	0.000279722372663719	0.0288325889226328
TraesCS6A03G0772400	6A:526664410-526665860|+	--	Cyanobacterial aminoacyl-tRNA synthetase, CAAD domain||Protein CURVATURE THYLAKOID 1	251.786785172351	38.0321786683329	2.69037376707094	0.000271156368900127	0.0281453980419447
TraesCS2A03G0748200	2A:519856914-519859496|-	--	Protein kinase domain||S-locus glycoprotein domain||Bulb-type lectin domain||PAN/Apple domain||Serine/threonine-protein kinase, active site||Protein kinase-like domain superfamily||Protein kinase, ATP binding site||S-receptor-like serine/threonine-protein kinase||Bulb-type lectin domain superfamily	119.267424555324	17.9596399267127	2.69043361125274	0.000491241427306732	0.0437395070588598
TraesCS7D03G0215400	7D:58612185-58613834|+	--	GDSL lipase/esterase||GDSL lipase/esterase-like, plant||SGNH hydrolase superfamily	1742.81575842217	263.021868086805	2.69500523744547	0.000121213895447079	0.0151027644789645
TraesCSU03G0219400	Un:181215479-181223995|-	--	Major sperm protein (MSP) domain||Protein kinase domain||Serine/threonine-protein kinase, active site||PapD-like superfamily||Protein kinase-like domain superfamily||Immunoglobulin-like fold||Protein kinase, ATP binding site	1617.68276638928	244.039813121803	2.69553559967054	0.000122412385261035	0.0152378571592317
TraesCS4B03G0941400	4B:652379536-652385675|+	--	Achaete-scute transcription factor-related||Helix-loop-helix DNA-binding domain superfamily	338.704590222852	50.8434405131108	2.70034772143588	0.00020984488450551	0.0231219419209788
TraesCS7B03G0713900	7B:484369719-484378169|-	--	Aldehyde dehydrogenase domain||Aldehyde dehydrogenase, cysteine active site||Aldehyde/histidinol dehydrogenase||Aldehyde dehydrogenase, N-terminal||Aldehyde dehydrogenase, C-terminal||Aldehyde dehydrogenase, glutamic acid active site	184.580538002287	27.6481519240547	2.70097191165233	0.000304156392746224	0.0303172893466532
TraesCS2D03G0129100	2D:29861040-29862508|-	--	Ribulose bisphosphate carboxylase small chain, domain||Ribulose-1,5-bisphosphate carboxylase small subunit, N-terminal||Ribulose bisphosphate carboxylase, small chain||Ribulose bisphosphate carboxylase, small subunit superfamily	1367.0206843348	205.261195855939	2.70218053503846	0.00012250433465373	0.0152421904441366
TraesCS2D03G0294300	2D:84582858-84589506|-	--	Armadillo-like helical||Armadillo-type fold	916.411273760103	137.045470209836	2.70765316120834	0.000130310789725103	0.0158322735164938
TraesCS5B03G0625900	5B:422831869-422833390|+	--	Alpha/beta hydrolase fold-3||Alpha/Beta hydrolase fold||Lipase, GDXG, putative serine active site	939.117610102862	140.171143549824	2.7104531874009	0.000126067144037744	0.0154690300568117
TraesCS2B03G1531500	2B:800876216-800877611|-	--	Thioredoxin domain||Thioredoxin-like superfamily||Thioredoxin-like 4, chloroplastic	336.577130385267	50.1500536673472	2.7110228785654	0.000192423976926255	0.0215676554978352
TraesCS5A03G0192800LC	5A:92870035-92870340|-	--	--	121.160558278425	17.9596399267127	2.71312987107994	0.000437518733201695	0.0399153547431205
TraesCS2A03G1115300LC	2A:719837335-719837883|+	--	--	149.677212882512	22.1854375565275	2.71479920739053	0.000416012209586352	0.0382656228429859
TraesCS7B03G1242100	7B:728528488-728529467|-	--	NB-ARC||P-loop containing nucleoside triphosphate hydrolase||Virus X resistance protein-like, coiled-coil domain||Rx, N-terminal	213.924110710343	31.6934822236107	2.71750024454447	0.000243961786552231	0.0256947274309031
TraesCS7A03G1350400	7A:733728028-733729668|+	--	Leucine-rich repeat domain superfamily	114.534590247573	16.9031905192591	2.71892793319122	0.000482035142356976	0.043222754479041
TraesCS6A03G0915800LC	6A:590582515-590583035|+	--	--	136.160378356934	20.1060703512936	2.71952943894302	0.00046446973225805	0.0419154079083753
TraesCS1B03G0047700	1B:11705253-11710444|-	--	Peptidase S10, serine carboxypeptidase||Alpha/Beta hydrolase fold||Serine carboxypeptidases, histidine active site	328.458700957917	48.5966727428698	2.72109165167918	0.000175771140455953	0.0200722215017252
TraesCS6B03G0727700LC	6B:449046216-449048392|-	--	--	167.844134862952	24.7720827641856	2.72166608686871	0.000304832326920351	0.0303487974348021
TraesCS2D03G0678100	2D:377534309-377536274|+	--	Alpha carbonic anhydrase domain||Carbonic anhydrase, alpha-class||Alpha carbonic anhydrase domain superfamily||Carbonic anhydrase, prokaryotic-like	221.748238298763	32.7499316310644	2.72216848098405	0.000234587889535718	0.0249615737584954
TraesCS5B03G1278600LC	5B:687855078-687855404|+	--	--	122.107125139975	17.9596399267127	2.72434549496191	0.000413096671235202	0.0380648248769266
TraesCS7A03G0776000LC	7A:454078147-454081164|-	--	--	179.292853400692	26.4112351863423	2.72479977359519	0.000296373394581508	0.0296328960789217
TraesCS7B03G1059300	7B:666829779-666832796|-	--	Protein kinase domain||Serine/threonine-protein kinase, active site||Protein kinase-like domain superfamily||Protein kinase, ATP binding site	172.275168802135	25.3547857788886	2.72585220832507	0.000313143217325606	0.0309729642765215
TraesCS5B03G0296100LC	5B:172479353-172480780|-	--	--	158.076665878882	23.2418869639812	2.72675284716951	0.000353831239709798	0.0343229169109039
TraesCS2D03G0880300	2D:493964788-493966518|+	--	Tensin phosphatase, C2 domain||Protein-tyrosine phosphatase-like	116.018533943231	16.9901267313853	2.7301319994222	0.000427178533920974	0.0391241670542483
TraesCS3D03G0502500	3D:284716551-284720288|+	--	Lycopene cyclase, beta/epsilon||FAD/NAD(P)-binding domain superfamily	668.389083857248	98.3732039883941	2.73022732801022	0.000129021751082786	0.0157015704009324
TraesCS5B03G0558600	5B:384723086-384724204|-	--	Chlorophyll A-B binding protein, plant and chromista||Chlorophyll A-B binding protein||Chlorophyll a/b binding domain superfamily	879.478737762323	129.211228268735	2.73315954914963	0.000114913182146847	0.014418739637579
TraesCS5D03G0111700	5D:43683512-43684777|+	--	NB-ARC||P-loop containing nucleoside triphosphate hydrolase||CTD phosphatase Fcp1||Rx, N-terminal	138.414229452405	20.246165163228	2.73323633715978	0.000419411882538327	0.0385402389892953
TraesCSU03G0053700	Un:28323986-28324333|+	--	Plant lipid transfer protein/Par allergen||Bifunctional inhibitor/plant lipid transfer protein/seed storage helical domain||Bifunctional inhibitor/plant lipid transfer protein/seed storage helical domain superfamily	598.369628307557	87.6853008186563	2.73631817547367	0.000128284298936572	0.0156475169567078
TraesCS2A03G0274100	2A:85265000-85271009|+	--	CobN/magnesium chelatase||Magnesium-chelatase, subunit H||Magnesium chelatase, subunit H, N-terminal	8993.1747416285	1316.02926889726	2.73993568007201	8.54060442732963e-05	0.0113630505587753
TraesCS7A03G0168900LC	7A:41593946-41594587|+	--	--	116.427723970674	16.9031905192591	2.74255339336792	0.000427178533920974	0.0391241670542483
TraesCS2B03G0722300LC	2B:393296047-393297006|-	--	--	145.909328620952	21.1289881490738	2.74803871517729	0.000388238190959864	0.0365280505507327
TraesCS2D03G1177900	2D:619071622-619076419|-	--	Lipoxygenase||PLAT/LH2 domain||Lipoxygenase, plant||Lipoxygenase, C-terminal||Lipoxygenase, conserved site||Lipoxigenase, C-terminal domain superfamily||PLAT/LH2 domain superfamily||Lipoxygenase, domain 3	305.979554464805	44.4036035942867	2.74869157630144	0.000166330343759298	0.0191664287262334
TraesCS3A03G0423600LC	3A:214341377-214344827|+	--	--	204.432506128294	29.5805834087033	2.75120153351742	0.00023012641249487	0.0246919801978269
TraesCS3B03G0876900	3B:569349312-569353598|-	--	Oxygen oxidoreductase covalent FAD-binding site||FAD linked oxidase, N-terminal||Cytokinin dehydrogenase 1, FAD/cytokinin binding domain||FAD-linked oxidase-like, C-terminal||FAD-binding domain, PCMH-type||FAD-binding, type PCMH, subdomain 1||FAD-binding, type PCMH, subdomain 2||Cytokinin dehydrogenase, C-terminal domain superfamily||FAD-binding, type PCMH-like superfamily	173.558151736544	24.9885891845857	2.75743506188473	0.000236608346960095	0.0251564936767935
TraesCS3B03G1337500LC	3B:792671781-792675527|-	--	--	527.40260880893	76.1458745705474	2.75748895657249	0.000117925955811325	0.014748208144505
TraesCS2B03G0825800	2B:461475007-461477104|+	--	ABA/WDS induced protein	1622.17751268913	234.417181912763	2.75754657168695	8.83490144256091e-05	0.0117020770050524
TraesCS1A03G1021900	1A:579629281-579632783|-	--	Protein kinase domain||Leucine-rich repeat||Leucine-rich repeat, typical subtype||Serine/threonine-protein kinase, active site||Protein kinase-like domain superfamily||Protein kinase, ATP binding site||Leucine-rich repeat domain superfamily||Leucine-rich repeat-containing N-terminal, plant-type	2080.43327963485	300.460724202669	2.75854283949669	8.55930750697279e-05	0.0113822575800601
TraesCS2D03G0877400	2D:491819142-491824335|-	--	Kinesin motor domain||Kinesin motor domain, conserved site||P-loop containing nucleoside triphosphate hydrolase||Kinesin motor domain superfamily||NPK1-activating kinesin-like protein, C-terminal	96.4286703957448	13.8238562745675	2.75878623022861	0.000516971637209615	0.0455139781986921
TraesCS5B03G0153100LC	5B:69842818-69845603|+	--	--	637.039497823279	91.9110984484711	2.75883469226416	0.000110059210009427	0.0140037915415668
TraesCS6B03G0823100	6B:521337084-521341907|-	--	Aldehyde dehydrogenase NAD(P)-dependent||Aldehyde dehydrogenase domain||Aldehyde/histidinol dehydrogenase||Aldehyde dehydrogenase, N-terminal||Aldehyde dehydrogenase, C-terminal	322.779299788615	46.4837739279624	2.75990182389257	0.00015234433015568	0.0180619437832574
TraesCS4A03G0130200	4A:62558059-62561080|+	--	Very-long-chain 3-ketoacyl-CoA synthase||FAE1/Type III polyketide synthase-like protein||3-Oxoacyl-[acyl-carrier-protein (ACP)] synthase III, C-terminal||Thiolase-like	417.997664497887	59.9772961051842	2.76589007567251	0.00013067162838446	0.0158589461273151
TraesCS4D03G0809000	4D:502538856-502541333|+	--	Dihydrodipicolinate reductase, N-terminal||Dihydrodipicolinate reductase, C-terminal||Dihydrodipicolinate reductase||NAD(P)-binding domain superfamily	310.473930588463	44.370875113055	2.77078065946401	0.000150997999508062	0.0179342058543057
TraesCS2D03G0233400	2D:63795033-63799606|-	--	ABC transporter-like||AAA+ ATPase domain||ABC-2 type transporter||ABC transporter-like, conserved site||P-loop containing nucleoside triphosphate hydrolase||ABC transporter family G domain	231.525876979557	33.0502893235134	2.7712628283442	0.000205438736203433	0.0227114949314662
TraesCS2D03G0523400LC	2D:251441180-251442973|+	--	--	141.038462370979	20.0725387416201	2.77265830383467	0.000271370882006072	0.0281567080839905
TraesCS3D03G0390300	3D:162579838-162581535|+	--	--	104.122354770521	14.7902917043517	2.77273615760099	0.000461103460872568	0.0416680078666553
TraesCS2A03G0633000LC	2A:408034362-408036455|+	--	--	681.528140316138	97.1933454857396	2.77569305847636	9.6359197516523e-05	0.0125391312364737
TraesCS5D03G0953700	5D:492022296-492023114|+	--	Zinc finger C2H2-type||Zinc finger C2H2 superfamily	119.173650309532	16.9031905192591	2.77614806649715	0.000357280665660198	0.0345820719780531
TraesCS3D03G0718900	3D:431091449-431100016|-	--	Protein kinase domain||EGF-like domain||S-locus glycoprotein domain||Bulb-type lectin domain||PAN/Apple domain||Serine/threonine-protein kinase, active site||Protein kinase-like domain superfamily||Bulb-type lectin domain superfamily||Serine-threonine/tyrosine-protein kinase, catalytic domain||S-receptor-like serine/threonine-protein kinase||S-locus receptor kinase, C-terminal||Tyrosine-protein k…	223.095328660087	31.6934822236107	2.77802650553962	0.00018047610807356	0.0205014458295981
TraesCS4D03G0167900	4D:62333599-62334768|+	--	Homeobox domain||Homeodomain, ZF-HD class||ZF-HD homeobox protein, Cys/His-rich dimerisation domain||Homeobox-like domain superfamily	178.813810847865	25.3547857788886	2.77955700571581	0.000244866014337701	0.0257776077287786
TraesCS4D03G0010300	4D:3327946-3335748|-	--	NB-ARC||AAA+ ATPase domain||P-loop containing nucleoside triphosphate hydrolase||Leucine-rich repeat domain superfamily||Rx, N-terminal||Apoptotic protease-activating factors, helical domain	128.940072605411	18.2127985100126	2.78276248762481	0.000379248140449088	0.036339164492169
TraesCS2D03G1330600	2D:652785698-652786132|+	--	Ribosomal protein S17/S11||Nucleic acid-binding, OB-fold||30S ribosomal protein S17	744.722348345723	105.327106994531	2.78779369099023	9.25144425208337e-05	0.0122244950846678
TraesCS2B03G1251400	2B:701939909-701945040|+	--	NB-ARC||P-loop containing nucleoside triphosphate hydrolase||Leucine-rich repeat domain superfamily||Winged helix-like DNA-binding domain superfamily||Rx, N-terminal||Apoptotic protease-activating factors, helical domain	486.929200220128	68.6692114844899	2.79117344867199	0.000109495320131399	0.0139422298798339
TraesCS2A03G0572700LC	2A:350424804-350425845|-	--	--	466.553709064647	65.7595864624451	2.79186865849034	0.000110630903637066	0.0140399142979181
TraesCS7B03G0938600LC	7B:612128934-612129537|-	--	--	127.952014307166	17.9546238826175	2.79213320119247	0.00029455000634693	0.0295265906619619
TraesCS7B03G1334800	7B:762326732-762330626|+	--	Leucine-rich repeat domain superfamily	2568.03589538567	362.362146756616	2.79215285820336	7.07469646799296e-05	0.00991200645904308
TraesCS2B03G0014500	2B:4057416-4065064|-	--	NB-ARC||P-loop containing nucleoside triphosphate hydrolase||Leucine-rich repeat domain superfamily||Winged helix-like DNA-binding domain superfamily||Rx, N-terminal||Apoptotic protease-activating factors, helical domain	250.384	35.1057027829543	2.79744145819208	0.000166148580935414	0.0191620386728625
TraesCS5B03G0296000LC	5B:172477418-172478810|-	--	--	317.099898619314	44.370875113055	2.80123369707597	0.000127759487917019	0.0155977670465648
TraesCS1A03G0402200	1A:258696737-258701050|+	--	Cellulose synthase||Zinc finger, RING/FYVE/PHD-type||Cellulose synthase, RING-type zinc finger||Nucleotide-diphospho-sugar transferases	191.156376628278	26.6615758840196	2.80362484438593	0.000192637725854726	0.0215825450436819
TraesCS5A03G0740900LC	5A:513792250-513793155|+	--	--	271.662595156514	37.9205359088737	2.80416178591524	0.000154497185798773	0.0182846802500802
TraesCSU03G0546400LC	Un:335464966-335465535|-	--	--	246.482442668205	34.3472108260375	2.80619907498367	0.000155838960300827	0.0184026565072371
TraesCS7A03G1152800LC	7A:675357253-675362448|-	--	--	2409.38869281153	335.82265631785	2.80985321104143	6.45141557201742e-05	0.00921295298710582
TraesCS3A03G0567800LC	3A:412582726-412584261|+	--	--	137.252194924778	19.0160893341664	2.8109475982829	0.000247451023051542	0.0260086819973322
TraesCS4D03G0230100	4D:96930191-96934231|+	--	Signal recognition particle, SRP54 subunit, GTPase domain||AAA+ ATPase domain||Signal recognition particle, SRP54 subunit, M-domain||Signal recognition particle protein||Signal recognition particle SRP54, helical bundle||Signal recognition particle, SRP54 subunit||P-loop containing nucleoside triphosphate hydrolase||Signal recognition particle, SRP54 subunit, M-domain superfamily||Signal recognit…	500.281145314616	69.5899313998467	2.81100957012235	9.90513629531187e-05	0.0127775390709082
TraesCS3D03G0152300LC	3D:37874677-37877688|+	--	--	99.3895204627701	13.733842296898	2.81170288070322	0.000449148331825844	0.0407672027893373
TraesCS7D03G0112200	7D:27108911-27111063|-	--	UDP-glucuronosyl/UDP-glucosyltransferase	936.270846776612	129.943277116804	2.81528143495532	7.56670774135485e-05	0.0103459505744942
TraesCS6A03G0172400LC	6A:49037948-49041647|+	--	--	363.551064661175	50.3728890883267	2.81582306671142	0.00010796382502848	0.0137537869935995
TraesCS5B03G1135900	5B:638613754-638614919|-	--	Chlorophyll A-B binding protein, plant and chromista||Chlorophyll A-B binding protein||Chlorophyll a/b binding domain superfamily	206.351575817942	28.5241340012497	2.81691869399008	0.000173048622137871	0.0198207172355081
TraesCS2B03G1225600	2B:691077599-691086215|+	--	SIT4 phosphatase-associated protein family||Armadillo-type fold	2879.83139491474	399.149226358291	2.81801344571806	6.06470546292328e-05	0.0087138863082853
TraesCS4D03G0139800	4D:48540783-48542449|-	--	O-methyltransferase domain||Plant methyltransferase dimerisation||O-methyltransferase COMT-type||S-adenosyl-L-methionine-dependent methyltransferase||Winged helix-like DNA-binding domain superfamily||Winged helix DNA-binding domain superfamily	1380.08832837826	191.217342749118	2.81808872349048	6.78553868605198e-05	0.00957205976702941
TraesCS2A03G0010500LC	2A:2808085-2810936|-	--	--	320.886166065515	44.370875113055	2.81835110576779	0.000116261525059203	0.0145605278989638
TraesCSU03G0502800LC	Un:305551288-305551658|-	--	--	872.653651343942	120.603234673742	2.82128629935227	7.25653439710733e-05	0.0101189394447065
TraesCS5B03G0947900LC	5B:559903152-559905920|+	--	--	239.481415972199	32.7499316310644	2.83309880633994	0.000131716457155668	0.0159712191412936
TraesCS1D03G0195900LC	1D:72389450-72393367|+	--	--	108.855189078272	14.7902917043517	2.83679059320011	0.000332315433475568	0.0326200300804926
TraesCS7D03G1074000	7D:573903026-573906390|-	--	NB-ARC||P-loop containing nucleoside triphosphate hydrolase||Leucine-rich repeat domain superfamily||Winged helix-like DNA-binding domain superfamily||Rx, N-terminal||Apoptotic protease-activating factors, helical domain	618.800199787415	84.5159525962953	2.83778020341586	7.80607667485482e-05	0.0105517496411696
TraesCS4A03G0117600	4A:55349876-55352750|-	--	Multi antimicrobial extrusion protein	152.903204426326	20.7441118659869	2.84189470000106	0.000210789321057466	0.0232164158898801
TraesCS5D03G0833500LC	5D:448548212-448549194|-	--	--	171.41684506382	23.2418869639812	2.8435477880035	0.000200651195406183	0.0222745371978998
TraesCS5A03G0467800	5A:368839380-368842192|+	--	Tetratricopeptide-like helical domain superfamily||Protein FLUORESCENT IN BLUE LIGHT	240.353536394617	32.6159030317743	2.84423445664952	0.000127676711409133	0.0155947983221155
TraesCS1A03G0392400LC	1A:253485871-253487187|-	--	--	218.09611602724	29.5805834087033	2.84448526144314	0.000141219389879171	0.0169163605774488
TraesCS3A03G0856100	3A:608475646-608477142|-	--	--	637.986064684829	86.6288514112027	2.84624997272181	7.30085762638458e-05	0.0101754272748921
TraesCS5B03G0475100LC	5B:328277510-328279559|+	--	--	102.01734048427	13.733842296898	2.84930452260476	0.000364978048511267	0.0352121317254487
TraesCS2D03G0552300LC	2D:280341008-280342455|+	--	--	382.413012066277	51.7660209652309	2.84950885388674	9.75704159671294e-05	0.0126718033901614
TraesCS2A03G0010800	2A:2813845-2818200|-	--	NB-ARC||P-loop containing nucleoside triphosphate hydrolase||Leucine-rich repeat domain superfamily||Winged helix-like DNA-binding domain superfamily||Rx, N-terminal||Apoptotic protease-activating factors, helical domain	154.823087702762	20.8861158120914	2.85009758049462	0.000191741029993011	0.0215352980228054
TraesCS4B03G0868900	4B:624428997-624430668|+	--	Aspartic peptidase domain superfamily||Xylanase inhibitor, C-terminal||Xylanase inhibitor, N-terminal||Peptidase family A1 domain||Pepsin-like domain, plant	141.038462370979	19.0160893341664	2.85017146566146	0.00020114935137259	0.0223107849082012
TraesCS1A03G1023200	1A:579961480-579962172|-	--	SANT/Myb domain||Homeobox-like domain superfamily	102.428110917972	13.733842296898	2.85509469175304	0.000364978048511267	0.0352121317254487
TraesCS2B03G1032300	2B:583282299-583286765|+	--	--	126.801695043477	16.9724412627988	2.85970917038401	0.000225048873175459	0.0242463802133624
TraesCS7B03G0522500LC	7B:317577951-317578481|-	--	--	141.985029232529	19.0160893341664	2.85981304115539	0.000191117704139236	0.0215207086349441
TraesCS4D03G0292500LC	4D:131575844-131576276|+	--	--	448.337771428084	60.2176162248604	2.86119448812748	7.71626868607613e-05	0.0104784876726643
TraesCS7B03G0507800LC	7B:300225285-300226160|-	--	--	277.056777405639	37.145855288085	2.86219504933091	0.000113480418472518	0.0142792624677966
TraesCS3A03G0483800LC	3A:294443331-294444118|-	--	--	95.1510208750825	12.6773928894443	2.86331737195694	0.00040520687155803	0.0375975600197635
TraesCS6A03G0172600LC	6A:49039743-49040950|+	--	--	244.411112668481	32.6851374765308	2.86532606364134	0.00011282334243372	0.0142152286801162
TraesCS2B03G0013800LC	2B:3957372-3959579|-	--	--	185.836348383421	24.7704394176479	2.86856700895103	0.000145085944952658	0.0173323451301259
TraesCS2B03G1250700LC	2B:701827401-701830060|+	--	--	397.485074281255	52.9900158357649	2.87162396292272	8.2812432342766e-05	0.011104664858436
TraesCS3D03G0827300	3D:488789279-488790591|+	--	Pectinesterase inhibitor domain||Invertase/pectin methylesterase inhibitor domain superfamily	133.465927478577	17.6495053334162	2.87750067048583	0.000223999957504195	0.0241528814324249
TraesCS1B03G0261600LC	1B:108903559-108921897|-	--	--	75.9434003740794	9.96696950319545	2.88176226453369	0.00050536852363864	0.0446916025692444
TraesCS2B03G1283800	2B:715213560-715217715|-	--	Protein kinase domain||S-locus glycoprotein domain||Serine-threonine/tyrosine-protein kinase, catalytic domain||Bulb-type lectin domain||PAN/Apple domain||Protein kinase-like domain superfamily||Protein kinase, ATP binding site||Bulb-type lectin domain superfamily||Serine/threonine-protein kinase, active site||S-receptor-like serine/threonine-protein kinase	888.333366102081	117.641866837813	2.88280454558203	5.23926338672294e-05	0.00779925167992306
TraesCS2D03G0869000	2D:487117959-487120302|-	--	Peptidoglycan binding-like||PGBD-like superfamily||PGBD superfamily||Heat shock protein DnaJ, cysteine-rich domain superfamily	696.381791187302	92.0895874835031	2.88451079430608	5.56246795430368e-05	0.00819421770031337
TraesCS5B03G0609400	5B:413648465-413649993|+	--	Oxoglutarate/iron-dependent dioxygenase||Non-haem dioxygenase N-terminal domain||Isopenicillin N synthase-like superfamily	982.536402289099	129.943277116804	2.88485720611157	5.21045071165473e-05	0.00776502699352522
TraesCS2D03G0168500	2D:38893177-38897280|+	--	NB-ARC||P-loop containing nucleoside triphosphate hydrolase||Leucine-rich repeat domain superfamily||Winged helix-like DNA-binding domain superfamily	160.916366463533	21.1289881490738	2.88916143510186	0.00019197382927812	0.0215352980228054
TraesCS6A03G0598000LC	6A:404180879-404181448|+	--	--	200.672174648641	26.3454110669525	2.89079763936788	0.000132152536341284	0.0160022744413985
TraesCSU03G0149500LC	Un:124263885-124264774|+	--	--	98.912592000164	12.9186103916036	2.89224653565184	0.00030377219589277	0.0302931854117216
TraesCS1B03G0587300LC	1B:365719407-365723867|-	--	--	428.444911319577	55.8791007342498	2.90338487872515	6.79286207968656e-05	0.00957244526348224
TraesCS5D03G0866900	5D:460466052-460467832|+	--	Pentatricopeptide repeat||Tetratricopeptide-like helical domain superfamily||Pentacotripeptide-repeat region of PRORP	122.107125139975	15.8467411118054	2.90360644667172	0.000213161053514343	0.0234196221727703
TraesCS3D03G0204800	3D:54743764-54746398|-	--	Leucine-rich repeat||Leucine-rich repeat domain superfamily	69.189890128236	8.90149676624766	2.90863033772128	0.000537281827075531	0.0463386033594144
TraesCS4B03G0618400	4B:471382505-471384145|+	--	Very-long-chain 3-ketoacyl-CoA synthase||FAE1/Type III polyketide synthase-like protein||3-Oxoacyl-[acyl-carrier-protein (ACP)] synthase III, C-terminal||Thiolase-like	132.992786688352	17.2030549332945	2.90908522193632	0.000223999957504195	0.0241528814324249
TraesCS3A03G0498300	3A:320191246-320201923|+	--	Vta1/Callose synthase, N-terminal domain superfamily||1,3-beta-glucan synthase subunit FKS1-like, domain-1	185.510841988662	24.0162313417695	2.91042476866084	0.00011252294273542	0.0142152286801162
TraesCS3B03G0398700	3B:178495230-178495709|-	--	Protein of unknown function DUF538||At5g01610-like superfamily	1315.55138853033	170.648430643686	2.91307634485875	4.14514652364906e-05	0.00644580321762046
TraesCS2B03G0626600	2B:299698522-299707162|+	--	--	204.841009165908	26.4112351863423	2.91685984974011	0.000114084935900281	0.0143417990107253
TraesCS5A03G0723700	5A:505597364-505602405|-	--	Phosphatidylethanolamine-binding, conserved site||Phosphatidylethanolamine-binding protein||Phosphatidylethanolamine-binding protein, eukaryotic||PEBP-like superfamily	116.246481036322	14.9320641234964	2.91781144802241	0.000213571804180139	0.0234326191751056
TraesCS2B03G0125800LC	2B:32073595-32076519|-	--	--	196.88590720244	25.3547857788886	2.91836533070001	0.0001209841379602	0.0150811816085341
TraesCS2D03G0693200	2D:384460021-384460701|+	--	ABA/WDS induced protein	6080.38500640364	785.998359145546	2.91877976288242	3.3491567124756e-05	0.00547775012029425
TraesCS4B03G0933700	4B:649635687-649637294|+	--	Pentatricopeptide repeat||Tetratricopeptide-like helical domain superfamily	131.572793755477	16.9031905192591	2.91880022107431	0.000179939864042131	0.0204781391347607
TraesCS1D03G0982000	1D:482293453-482294096|+	--	SANT/Myb domain||Homeobox-like domain superfamily	989.833346982771	127.830378301897	2.91915928623487	4.1478736525255e-05	0.00644580321762046
TraesCS2B03G0434300LC	2B:161612648-161613721|+	--	--	116.427723970674	14.9018383351226	2.92295592781758	0.000213571804180139	0.0234326191751056
TraesCS6D03G0544300	6D:334768660-334773989|+	--	Aldehyde dehydrogenase NAD(P)-dependent||Aldehyde dehydrogenase domain||Aldehyde/histidinol dehydrogenase||Aldehyde dehydrogenase, N-terminal||Aldehyde dehydrogenase, C-terminal	584.978320438018	75.0079079292121	2.92862123456879	4.87431975217423e-05	0.00732827215945864
TraesCS6D03G0843000	6D:475775673-475777213|-	--	--	158.43679089681	20.1995517939925	2.93129067582202	0.000159055060632574	0.0187161570244135
TraesCS3D03G0427300LC	3D:191707061-191708052|+	--	--	75.7253489240153	9.50804466708322	2.94477627226909	0.00050536852363864	0.0446916025692444
TraesCS4A03G0722500	4A:587806275-587807243|+	--	Protein of unknown function DUF538||At5g01610-like superfamily	1115.42068762799	141.222693198594	2.94785963205591	3.55407564665795e-05	0.00572691313375354
TraesCS5A03G0670800LC	5A:482482909-482484060|-	--	--	179.254869832704	22.5395782532627	2.95203425630727	0.000115063443891264	0.014424024573512
TraesCS6A03G0558200LC	6A:361164418-361168941|+	--	--	78.3566989066011	9.78858247775173	2.95255425757183	0.000387624347657913	0.0365280505507327
TraesCS2A03G1240300	2A:754543299-754547384|+	--	Protein kinase domain||S-locus glycoprotein domain||Bulb-type lectin domain||PAN/Apple domain||Serine/threonine-protein kinase, active site||Protein kinase-like domain superfamily||Protein kinase, ATP binding site||S-receptor-like serine/threonine-protein kinase||Bulb-type lectin domain superfamily	78.7813263990672	9.8359475118409	2.95346120553158	0.000387624347657913	0.0365280505507327
TraesCS2A03G0624300LC	2A:401402161-401408266|+	--	--	75.2480620627596	9.34164562717518	2.96081254281811	0.00050536852363864	0.0446916025692444
TraesCS2A03G0633100LC	2A:408036495-408037511|-	--	--	75.2480620627596	9.34164562717518	2.96081254281811	0.00050536852363864	0.0446916025692444
TraesCS6B03G0184000	6B:59028485-59031411|-	--	--	102.229221047421	12.6773928894443	2.96670170802443	0.000245978384149667	0.0258844945782111
TraesCS4D03G0460700LC	4D:323711804-323712751|+	--	--	88.5352908109513	10.9640359622046	2.96680229219945	0.000270960841736798	0.0281360506585085
TraesCS5B03G0641100LC	5B:431846109-431846576|+	--	--	287.699438092718	35.800563589465	2.96959106981389	5.86856461946037e-05	0.00848508562540514
TraesCS5B03G0964600	5B:568767063-568769112|-	--	FAD-binding domain||FAD/NAD(P)-binding domain superfamily	187.420238586938	23.2418869639812	2.97222506062478	0.000103864265181549	0.0133334125985707
TraesCSU03G0445300LC	Un:277593983-277594341|-	--	--	119.712962867259	14.7447557057191	2.97822007125523	0.000167244710178778	0.019246850253361
TraesCS3B03G0863100	3B:561979295-561981165|-	--	Pyridoxal phosphate-dependent decarboxylase||Aromatic-L-amino-acid decarboxylase||Pyridoxal phosphate-dependent transferase, major domain||Pyridoxal phosphate-dependent transferase, small domain||Pyridoxal phosphate-dependent transferase	86.1375844010674	10.5644940745369	2.98019817236338	0.00034445795239848	0.0335233868594741
TraesCS7A03G0084200	7A:18305593-18309230|-	--	NB-ARC||P-loop containing nucleoside triphosphate hydrolase||Winged helix-like DNA-binding domain superfamily||Virus X resistance protein-like, coiled-coil domain||Rx, N-terminal||Apoptotic protease-activating factors, helical domain	77.6113899561058	9.50804466708322	2.98021003870663	0.000423145851043283	0.0388031582070492
TraesCS5A03G0761200LC	5A:524934640-524935840|+	--	--	69.099380893164	8.45159525962953	2.98052048968461	0.000537281827075531	0.0463386033594144
TraesCS2A03G0745400	2A:518630972-518634023|+	--	Protein kinase domain||S-locus glycoprotein domain||Bulb-type lectin domain||PAN/Apple domain||Serine/threonine-protein kinase, active site||Protein kinase-like domain superfamily||Protein kinase, ATP binding site||S-receptor-like serine/threonine-protein kinase||Bulb-type lectin domain superfamily	137.548443607521	16.9031905192591	2.98281879918461	0.000129775388372331	0.0157788890620798
TraesCS5B03G0803500	5B:503505553-503507961|-	--	Cytochrome P450||Cytochrome P450, E-class, group I||Cytochrome P450, conserved site||Cytochrome P450 superfamily	120.475184766235	14.7902917043517	2.9829553534928	0.000167244710178778	0.019246850253361
TraesCS2A03G0173400LC	2A:45711958-45713739|-	--	--	740.588782200641	91.0788335437978	2.98919022826439	3.17195057463487e-05	0.00525885354437289
TraesCS3A03G1234200	3A:740415971-740423770|-	--	--	109.633721245595	13.3532562066203	2.99323577143717	0.000213925031597882	0.0234326191751056
TraesCS2A03G0265200	2A:82038441-82039211|+	--	NB-ARC||P-loop containing nucleoside triphosphate hydrolase||Virus X resistance protein-like, coiled-coil domain||Rx, N-terminal	71.9390814778146	8.7121115935117	2.99534150200954	0.00044370647124276	0.0403954834864827
TraesCS3B03G1523800	3B:851101839-851116421|-	--	Ribosome-inactivating protein||NB-ARC||Ribosome-inactivating protein, subdomain 1||P-loop containing nucleoside triphosphate hydrolase||Leucine-rich repeat domain superfamily||Ribosome-inactivating protein superfamily||Winged helix-like DNA-binding domain superfamily	294.38229394211	35.9382471199144	2.99718644426664	6.02650080784726e-05	0.00867113999731032
TraesCS5B03G0462300	5B:320362345-320365183|-	--	Tetratricopeptide-like helical domain superfamily||Protein FLUORESCENT IN BLUE LIGHT	880.707646668409	107.718054799227	2.9973706504011	2.91536281413407e-05	0.00489120870627927
TraesCS7B03G0180500	7B:74921614-74927714|-	--	Pentatricopeptide repeat||Tetratricopeptide-like helical domain superfamily||Pentacotripeptide-repeat region of PRORP	362.786332088615	44.2112092998771	3.00053050752707	4.63198151120047e-05	0.00704061189702471
TraesCS1B03G0693700LC	1B:439488429-439490432|-	--	--	234.748581664448	28.5241340012497	3.0028240566144	6.65165717100953e-05	0.00944372271544954
TraesCS4A03G0181600LC	4A:94377767-94378192|-	--	--	161.195530826073	19.5170617347132	3.00545669043857	0.000103151936789729	0.0132547257504952
TraesCS4A03G0628300LC	4A:545606045-545610834|-	--	--	96.5498198781195	11.6209434819906	3.00861199057425	0.000230573259382166	0.0246919801978269
TraesCSU03G0224000LC	Un:184386459-184389470|-	--	--	186.413949083835	22.5298306446349	3.00911345465778	8.28539669300718e-05	0.011104664858436
TraesCS7A03G1343700	7A:731966505-731967905|-	--	BURP domain	88.0307181241678	10.5644940745369	3.01151697376508	0.000293350095226508	0.0295265906619619
TraesCS7D03G1159200LC	7D:601422381-601422686|+	--	--	201.618741510191	24.2983363714349	3.01371050336433	7.81752074181786e-05	0.0105536530014541
TraesCS7D03G1190200LC	7D:610528121-610529213|-	--	--	232.334468940357	28.0155533256343	3.01376123087258	7.10158249090382e-05	0.009923615218824
TraesCS5B03G0562300LC	5B:386552369-386555956|-	--	--	140.581724270445	16.9075744660969	3.01388810364293	0.000110626561255017	0.0140399142979181
TraesCS3A03G0205700	3A:59809064-59820690|+	--	Alliinase, C-terminal||Pyridoxal phosphate-dependent transferase, major domain||Pyridoxal phosphate-dependent transferase, small domain||Pyridoxal phosphate-dependent transferase||Alliinase, N-terminal domain superfamily	247.054	29.6897927567059	3.01895507479815	5.49389738981972e-05	0.00810592957803269
TraesCS1B03G0648900	1B:409158270-409159529|-	--	--	97.4963867396697	11.6209434819906	3.02266889960583	0.000214333448745155	0.0234326191751056
TraesCS4B03G0514600LC	4B:399586549-399587061|+	--	--	97.4963867396697	11.6209434819906	3.02266889960583	0.000214333448745155	0.0234326191751056
TraesCS4D03G0400000LC	4D:270857645-270860287|+	--	--	97.4963867396697	11.6209434819906	3.02266889960583	0.000214333448745155	0.0234326191751056
TraesCS6D03G0079900	6D:17619254-17620050|+	--	Histone H2B||Histone H2A/H2B/H3||Histone-fold	142.066527158715	16.9221714443938	3.02779621973689	9.95913939297226e-05	0.0128342996351173
TraesCS2B03G1325000LC	2B:732770400-732770679|+	--	--	203.323700313879	24.2547599956194	3.02842812767385	7.53014699390654e-05	0.0103118173105468
TraesCS2B03G0478800	2B:184498722-184500555|-	--	Protein of unknown function DUF2996	1457.11086697032	174.314152229859	3.02986530681518	2.11223940560214e-05	0.00378258485107571
TraesCS6D03G0148200	6D:46015000-46018730|+	--	Very-long-chain 3-ketoacyl-CoA synthase||FAE1/Type III polyketide synthase-like protein||3-Oxoacyl-[acyl-carrier-protein (ACP)] synthase III, C-terminal||Thiolase-like	118.744046292566	14.0543856195294	3.03510209461907	0.000120964495751252	0.0150811816085341
TraesCS5B03G0908000	5B:544416196-544421821|+	--	BTB/POZ domain||MATH/TRAF domain||TRAF-like||SKP1/BTB/POZ domain superfamily||BTB/Kelch-associated	204.498773281931	24.2784766141696	3.03533391766711	7.25431562077482e-05	0.0101189394447065
TraesCS7A03G1348100	7A:733186959-733188017|-	--	NB-ARC||P-loop containing nucleoside triphosphate hydrolase	71.9390814778146	8.45159525962953	3.03851966860331	0.00044370647124276	0.0403954834864827
TraesCS7D03G0916400LC	7D:505553269-505553700|-	--	--	125.893392586175	14.7902917043517	3.04635696071799	0.0001171081547338	0.0146596768450439
TraesCS2B03G0791700LC	2B:435354304-435356054|+	--	--	241.45823397686	28.4163488111131	3.04889807929203	5.3068175863494e-05	0.00786470366296981
TraesCS6D03G0852800	6D:477880086-477880929|+	--	--	100.33608732432	11.7382640647328	3.04969562499066	0.000185484780941013	0.0209394499212123
TraesCS7D03G0367000	7D:114843470-114849478|-	--	Pentatricopeptide repeat||Tetratricopeptide-like helical domain superfamily||Pentacotripeptide-repeat region of PRORP	489.349589480241	57.6398906729106	3.05042605975452	2.76010730243715e-05	0.00468972117196263
TraesCS7A03G0616300LC	7A:271137338-271139951|+	--	--	332.181	39.066559988949	3.05137592516209	4.00569230266711e-05	0.0062745653473839
TraesCS1A03G0954800	1A:560618005-560619750|-	--	Leucine-rich repeat||Leucine-rich repeat-containing N-terminal, plant-type||Leucine-rich repeat domain superfamily	440.153590620839	51.7660209652309	3.05232186790496	3.32313086072807e-05	0.00543851772029337
TraesCS2D03G1287100LC	2D:644579638-644580039|+	--	--	64.1871092567157	7.39514585217584	3.06401643890631	0.00051873729900163	0.0456393014121619
TraesCS3B03G0062700LC	3B:17155597-17158236|-	--	--	109.975118808374	12.6773928894443	3.07194600033707	0.000142938916650895	0.0170911633374239
TraesCS3A03G0743600LC	3A:548491521-548493683|+	--	--	186.318337406416	21.506902861962	3.07503697733719	6.53453522259834e-05	0.00932167174321033
TraesCS2D03G0041500	2D:10035956-10037437|+	--	UDP-glucuronosyl/UDP-glucosyltransferase||UDP-glycosyltransferase family, conserved site	73.832215200915	8.45159525962953	3.07592962133341	0.000367677160720608	0.0354597105545298
TraesCS2D03G0952800	2D:538156988-538159386|+	--	Zinc/iron permease||Zinc/iron permease, fungal/plant	225.258541593965	25.9421686675176	3.07958806187215	4.40733490456943e-05	0.00677406068298292
TraesCS6B03G1183600	6B:701729974-701732415|+	--	SWEET sugar transporter	743.171769630638	85.7994308489538	3.08024008029389	2.04208173966493e-05	0.00367676497702707
TraesCS5B03G0054400LC	5B:21834992-21839467|+	--	--	86.9363855894754	9.91880142349742	3.08339872993135	0.000197100795885122	0.0219168854982555
TraesCS3B03G1402800	3B:812177442-812179417|+	--	Fungal lipase-like domain||Alpha/Beta hydrolase fold	132.93698079323	15.1224543369022	3.09304064021597	7.8430712579196e-05	0.0105794538421883
TraesCS2A03G0139000	2A:36420145-36438347|+	--	--	130.145644353486	14.7902917043517	3.09423423931176	9.29562760316939e-05	0.0122696764939212
TraesCS2D03G0864500	2D:484635760-484637234|-	--	Protein kinase domain||Serine/threonine-protein kinase, active site||Protein kinase-like domain superfamily||Protein kinase, ATP binding site	65.5741062791308	7.39514585217584	3.09479923625883	0.000467856753045244	0.0421640092710639
TraesCS7D03G0502300	7D:187111304-187114022|-	--	SAM dependent carboxyl methyltransferase||S-adenosyl-L-methionine-dependent methyltransferase||Methyltransferase, alpha-helical capping domain	356.669281222655	40.706412453011	3.09481659907773	2.75093367688895e-05	0.00467711324185402
TraesCS3D03G0116800	3D:26446074-26448043|-	--	Low-temperature-induced 78kDa/65kDa	148.860811815849	16.9031905192591	3.0967425374124	7.31169615126758e-05	0.0101852118293062
TraesCS6B03G0755200LC	6B:470359680-470363207|+	--	--	204.458442094841	23.2418869639812	3.09767507769831	5.59144648560929e-05	0.00820447890264651
TraesCS2B03G1175400	2B:665711488-665715744|-	--	EGF-type aspartate/asparagine hydroxylation site||Protein kinase domain||EGF-like domain||EGF-like calcium-binding domain||Serine/threonine-protein kinase, active site||Protein kinase-like domain superfamily||Protein kinase, ATP binding site||EGF-like calcium-binding, conserved site	406.458672656216	46.2713593850969	3.09893659697367	2.6104426980209e-05	0.00447533222444766
TraesCS7D03G0081200	7D:19290049-19292792|-	--	NB-ARC||P-loop containing nucleoside triphosphate hydrolase||Leucine-rich repeat domain superfamily||Winged helix-like DNA-binding domain superfamily||Virus X resistance protein-like, coiled-coil domain||Rx, N-terminal||Apoptotic protease-activating factors, helical domain	204.892995180016	23.2418869639812	3.10073622084684	5.385645850069e-05	0.00796824673857131
TraesCS1B03G1120900LC	1B:648275643-648275882|-	--	--	47.3283430775096	5.28224703726845	3.10143678534053	0.00057218534706817	0.0487811323694168
TraesCS3A03G0334300LC	3A:138341235-138342806|+	--	--	47.3283430775096	5.28224703726845	3.10143678534053	0.00057218534706817	0.0487811323694168
TraesCS4D03G0096000LC	4D:29211196-29213597|-	--	--	47.3283430775096	5.28224703726845	3.10143678534053	0.00057218534706817	0.0487811323694168
TraesCS2D03G0203300LC	2D:51621375-51621719|+	--	--	66.2596803085134	7.39514585217584	3.10977557875776	0.000422388314789428	0.0387603394747946
TraesCS3B03G1513200LC	3B:846470154-846474319|-	--	--	970.21355287692	109.762914282598	3.1098908581162	1.54502257678964e-05	0.00294393016131718
TraesCS2B03G0659200LC	2B:344270180-344274395|+	--	--	160.037544583858	17.9184317218516	3.11754701902239	5.99302507423714e-05	0.00862762746251214
TraesCS1A03G0262600LC	1A:109759953-109760504|+	--	--	84.7002734408057	9.37303922854005	3.12647803539698	0.000232467854183934	0.0248151759832358
TraesCS2D03G0155100	2D:36145863-36148541|+	--	Myc-type, basic helix-loop-helix (bHLH) domain||Helix-loop-helix DNA-binding domain superfamily	48.2749099390598	5.28224703726845	3.12993074023217	0.000499278114250389	0.0442630208565749
TraesCS2D03G0714700	2D:400570233-400576150|-	--	Chaperonin Cpn60||Chaperonin Cpn60/TCP-1 family||Chaperonin Cpn60, conserved site||GroEL-like apical domain superfamily||TCP-1-like chaperonin intermediate domain superfamily||GroEL-like equatorial domain superfamily	677.691019846347	75.4882691007316	3.13162848505928	1.70432902968097e-05	0.0031807788564855
TraesCS3B03G0861200	3B:560377013-560381528|-	--	O-acyltransferase, WSD1, N-terminal||O-acyltransferase WSD1, C-terminal||Chloramphenicol acetyltransferase-like domain superfamily	403.83517937284	44.7520902951868	3.13763165597272	1.98989412947782e-05	0.00359636963400747
TraesCS2D03G1059100	2D:580100399-580105466|+	--	NB-ARC||P-loop containing nucleoside triphosphate hydrolase||Leucine-rich repeat domain superfamily||Winged helix-like DNA-binding domain superfamily||Rx, N-terminal	1809.83583928397	200.725387416201	3.13918997881291	1.13074984387627e-05	0.00229541042363715
TraesCS7B03G0338100	7B:158892172-158894907|-	--	SAM dependent carboxyl methyltransferase||S-adenosyl-L-methionine-dependent methyltransferase||Methyltransferase, alpha-helical capping domain	338.768981752504	37.4708436985621	3.13966975676016	2.43517648285521e-05	0.00421549434501269
TraesCS2B03G1093300LC	2B:624209593-624214930|-	--	--	85.1930451503892	9.31764791860548	3.14327438606877	0.000232467854183934	0.0248151759832358
TraesCS1A03G0246700	1A:100181262-100183457|-	--	NB-ARC||AAA+ ATPase domain||P-loop containing nucleoside triphosphate hydrolase||Winged helix-like DNA-binding domain superfamily||Rx, N-terminal||Apoptotic protease-activating factors, helical domain	65.3371930434793	7.11204154651629	3.14496067321702	0.000258681175224541	0.0270610942364308
TraesCS7B03G0190000	7B:77664271-77667040|-	--	Ulp1 protease family, C-terminal catalytic domain||Papain-like cysteine peptidase superfamily	77.0299231520571	8.39806214370102	3.14603096861738	0.000279055513437672	0.0287749705313619
TraesCS6A03G0261300LC	6A:83053033-83055871|+	--	--	118.980355929099	13.0193666341003	3.1473310846665	8.01377078585339e-05	0.0107749672118662
TraesCS7D03G1263600LC	7D:632075815-632076393|+	--	--	80.5237984633007	8.76925379788272	3.14841131526541	0.000195315291495899	0.0217757662778936
TraesCS6A03G0100500	6A:25233324-25236087|+	--	Leucine-rich repeat||Leucine-rich repeat, typical subtype||Leucine-rich repeat domain superfamily	348.441447927839	38.164812653329	3.15388072285485	2.31810485172114e-05	0.00406292805680112
TraesCS4D03G0689900	4D:461686485-461689645|-	--	Cytochrome P450||Cytochrome P450, E-class, group I||Cytochrome P450, conserved site||Cytochrome P450 superfamily	116.427723970674	12.6773928894443	3.15411186761039	9.68414249860057e-05	0.012583253058581
TraesCS2B03G1527500LC	2B:799991498-799991815|-	--	--	97.2488616698624	10.5644940745369	3.15499560896954	0.000146585551845305	0.0175036534513221
TraesCS1A03G0026800LC	1A:7247347-7248495|+	--	--	49.2215	5.28224703726845	3.15787280760423	0.000436420594175468	0.0398287915505466
TraesCS2A03G1360400LC	2A:784853665-784855169|-	--	--	49.2215	5.28224703726845	3.15787280760423	0.000436420594175468	0.0398287915505466
TraesCSU03G0039100	Un:23419702-23420151|-	--	Amino acid/polyamine transporter I	145.77129667873	15.8467411118054	3.15892401635685	5.96444797159695e-05	0.00860041157244974
TraesCS2D03G0858100	2D:480941598-480942520|+	--	Oxygen-evolving enhancer protein 3||PsbQ-like domain superfamily	49.5299188849536	5.28224703726845	3.16686215619699	0.000436420594175468	0.0398287915505466
TraesCS7D03G1144900LC	7D:596183501-596183866|-	--	--	62.4699422382501	6.68139751859804	3.16887574590886	0.00035657226098358	0.0345260313393756
TraesCS7B03G0656300LC	7B:442693051-442694565|+	--	--	205.405008956392	22.1854375565275	3.17108634050956	4.10241835787662e-05	0.00639603226853984
TraesCS7B03G0551700LC	7B:350839339-350841759|-	--	--	54.2408176879366	5.73120641085669	3.18251609413917	0.000469533158276817	0.0422602019284977
TraesCS3A03G0395100LC	3A:187497531-187498930|+	--	--	405.644776375051	43.5482561383096	3.18331048726222	1.66066223851938e-05	0.00311531827529837
TraesCS3A03G0602700	3A:447806056-447806771|-	--	--	818.654476339652	87.6853008186563	3.18845407550224	1.11382877964669e-05	0.00227159759371981
TraesCS5A03G0533400	5A:415496398-415498519|+	--	GroES-like superfamily||Alcohol dehydrogenase, C-terminal||Alcohol dehydrogenase, N-terminal||Polyketide synthase, enoylreductase domain||NAD(P)-binding domain superfamily	2283.88865564453	244.391695240278	3.19098870571537	8.11455603398149e-06	0.00176417193775461
TraesCS2D03G1237800LC	2D:632552169-632553005|+	--	--	224.764689102889	23.9382486407701	3.19183360880269	2.70737745938943e-05	0.00461187746530476
TraesCS3B03G0763100LC	3B:487786740-487788471|+	--	--	129.487203788392	13.733842296898	3.19292164131813	6.64630303205934e-05	0.00944372271544954
TraesCS2D03G0956000	2D:539478444-539482511|-	--	Terpene synthase, N-terminal domain||Terpene synthase, metal-binding domain||Terpenoid cyclases/protein prenyltransferase alpha-alpha toroid||Isoprenoid synthase domain superfamily||Terpene synthase, N-terminal domain superfamily	248.947	26.4112351863423	3.19803708345163	2.64630231007232e-05	0.00453098590651406
TraesCS2A03G0850900LC	2A:589824489-589831635|-	--	--	60.5802791392123	6.33869644472215	3.1992032458446	0.000444112605624288	0.0403954834864827
TraesCS2B03G0524500	2B:211983652-211986337|-	--	--	377.860195921215	40.0883341934669	3.20006000471662	1.74441434140267e-05	0.00323152756744844
TraesCS2D03G0298500	2D:86770417-86772854|-	--	Multi antimicrobial extrusion protein	50.7224346289986	5.28224703726845	3.20109972563222	0.000382126674463761	0.0364839340300475
TraesCS4A03G0619900LC	4A:542395426-542395764|-	--	--	70.9925146162644	7.39514585217584	3.20912848466449	0.000283331692768229	0.0290810166844373
TraesCS2B03G1233500	2B:695241682-695244197|-	--	EGF-type aspartate/asparagine hydroxylation site||Protein kinase domain||EGF-like domain||EGF-like calcium-binding domain||Serine/threonine-protein kinase, active site||Protein kinase-like domain superfamily||Protein kinase, ATP binding site||EGF-like calcium-binding, conserved site||Wall-associated receptor kinase, galacturonan-binding domain	195.173941352587	20.4679105180831	3.21300192552809	3.38907419958189e-05	0.00553624882719207
TraesCS2A03G1350000	2A:781788344-781790027|-	--	NAC domain||NAC domain superfamily	51.1472502465768	5.28224703726845	3.21310268468745	0.000335144335939897	0.0328566828490472
TraesCS1A03G0018900	1A:4688180-4690620|-	--	Protein kinase domain||Leucine-rich repeat||Tyrosine-protein kinase, active site||Protein kinase-like domain superfamily||Protein kinase, ATP binding site||Leucine-rich repeat domain superfamily	63.2562712880486	6.55825085267463	3.21323385322719	0.000320044987568624	0.0315503329208448
TraesCS5B03G1092400	5B:620914786-620917572|-	--	Tryptophan synthase, alpha chain||Ribulose-phosphate binding barrel||Aldolase-type TIM barrel||Tryptophan synthase, alpha chain, active site	346.692826621278	36.4064605140764	3.21444930077411	1.67658598218843e-05	0.00314077300989176
TraesCS5B03G1015000LC	5B:590219478-590219805|+	--	--	46.8658005665176	4.81937604825434	3.21645337397492	0.00057218534706817	0.0487811323694168
TraesCS6B03G0159400LC	6B:50295381-50296243|+	--	--	81.4047500933165	8.45159525962953	3.21656324065131	0.000178982364593631	0.0203865651490166
TraesCS1A03G0999100	1A:574098700-574099589|+	--	Protein of unknown function DUF1645, plant	161.862933325083	16.9031905192591	3.21745305108128	3.85755586075196e-05	0.00610707181848185
TraesCS3D03G0918700LC	3D:531965406-531966089|-	--	--	161.862933325083	16.9031905192591	3.21745305108128	3.85755586075196e-05	0.00610707181848185
TraesCS5A03G0836000	5A:551713372-551716211|-	--	Flavin monooxygenase FMO||Flavin monooxygenase-like||FAD/NAD(P)-binding domain superfamily	70.9298890734977	7.33893710327208	3.21868375250098	0.000283331692768229	0.0290810166844373
TraesCS2B03G0627000LC	2B:299703580-299706069|-	--	--	235.33971648845	24.5736948723512	3.22052068998323	2.42775509726915e-05	0.00420810883526653
TraesCSU03G0519500LC	Un:315330589-315331806|-	--	--	294.894307718485	30.637032816157	3.22908244743969	1.75337314113233e-05	0.00324586966778945
TraesCS3B03G1509300LC	3B:844708588-844710279|+	--	--	437.313890036189	45.4273245205087	3.23095341006975	1.23988642748558e-05	0.00245365061866508
TraesCS1A03G0485800LC	1A:326626140-326627120|-	--	--	185.660836551596	19.2130024966036	3.23167533132827	3.59834664862567e-05	0.00575476589920494
TraesCS6A03G0127900LC	6A:32675599-32676051|+	--	--	52.0075981289464	5.28224703726845	3.23710969865459	0.000294416612142119	0.0295265906619619
TraesCS2B03G1234900	2B:696267288-696268176|-	--	Pectinesterase inhibitor domain||Invertase/pectin methylesterase inhibitor domain superfamily	52.0611773852605	5.28224703726845	3.2385916339943	0.000294416612142119	0.0295265906619619
TraesCS3D03G0803900LC	3D:478160979-478161431|-	--	--	52.0611773852605	5.28224703726845	3.2385916339943	0.000294416612142119	0.0295265906619619
TraesCS4A03G0037000	4A:14098780-14102940|-	--	Copper amine oxidase||Copper amine oxidase, catalytic domain||Copper amine oxidase, N2-terminal||Copper amine oxidase, N3-terminal||Copper amine oxidase, N-terminal||Copper amine oxidase, catalytic domain superfamily	52.0611773852605	5.28224703726845	3.2385916339943	0.000294416612142119	0.0295265906619619
TraesCS7D03G1126400	7D:589776951-589778674|+	--	Aspartic peptidase A1 family||Aspartic peptidase domain superfamily||Xylanase inhibitor, C-terminal||Xylanase inhibitor, N-terminal||Peptidase family A1 domain	52.0611773852605	5.28224703726845	3.2385916339943	0.000294416612142119	0.0295265906619619
TraesCS2B03G1233300	2B:694855613-694858022|-	--	Bromodomain||NET domain||Bromodomain-like superfamily||NET domain superfamily	138.31545621285	14.2066589953349	3.2395802414906	5.94467668406214e-05	0.00858117939524035
TraesCS5B03G0372000LC	5B:255442885-255443931|-	--	--	42.2138484473395	4.2578029947622	3.24005817201038	0.000533686413488453	0.0461030400460427
TraesCS2B03G1000300LC	2B:564579527-564581674|+	--	--	139.643996788815	14.3381018776479	3.24018600068527	5.6291030000474e-05	0.0082551925029832
TraesCS6A03G0329400LC	6A:113194441-113195493|-	--	--	73.746854989013	7.51520162128497	3.24109240310991	0.000212046570562295	0.0233163821777403
TraesCS6D03G0842900LC	6D:475774499-475774819|-	--	--	52.0200370294364	5.26587226426731	3.24183077987187	0.000294416612142119	0.0295265906619619
TraesCS3B03G0763000LC	3B:487785015-487786185|+	--	--	72.8856483393648	7.39514585217584	3.24702986816094	0.000233345607968786	0.0248563307023738
TraesCS2B03G0205100	2B:58334563-58335201|+	--	Germin||Cupin 1||RmlC-like cupin domain superfamily||RmlC-like jelly roll fold||Germin, manganese binding site	52.3815307896687	5.28224703726845	3.24742058922939	0.000294416612142119	0.0295265906619619
TraesCS7D03G1045000	7D:562548588-562548927|+	--	Bifunctional inhibitor/plant lipid transfer protein/seed storage helical domain||Bifunctional inhibitor/plant lipid transfer protein/seed storage helical domain superfamily||Putative lipid-transfer protein DIR1-like	83.2074248452262	8.45159525962953	3.24811417111485	0.000164134249227933	0.0190310678115556
TraesCS1A03G0811800LC	1A:518863033-518863650|+	--	--	55.3043788297253	5.57195177196728	3.25025424966286	0.000415922433686873	0.0382656228429859
TraesCS5D03G0737800LC	5D:423111900-423113735|-	--	--	42.3368350402719	4.22579762981476	3.25482072239591	0.000533686413488453	0.0461030400460427
TraesCS5B03G0031700	5B:13897917-13901506|+	--	Terpene synthase, N-terminal domain||Terpene synthase, metal-binding domain||Terpenoid cyclases/protein prenyltransferase alpha-alpha toroid||Isoprenoid synthase domain superfamily||Terpene cyclase-like 1, C-terminal domain||Terpene synthase, N-terminal domain superfamily	52.9392932092943	5.28224703726845	3.26266478465976	0.000259049405437606	0.0270783775056959
TraesCS2A03G0641700LC	2A:415000035-415000478|-	--	--	84.094670242689	8.45159525962953	3.26339322842849	0.000150625433215699	0.0178979245276703
TraesCS5A03G0193900LC	5A:93923145-93923786|-	--	--	63.4199797238628	6.33869644472215	3.2651581998616	0.000320044987568624	0.0315503329208448
TraesCS7A03G1303300LC	7A:718525498-718528478|-	--	--	126.839959447726	12.6773928894443	3.27755837313158	4.91653085942276e-05	0.00736499056566421
TraesCS2A03G1198900	2A:743733481-743737928|-	--	Leucine-rich repeat||Leucine-rich repeat, typical subtype||Leucine-rich repeat-containing N-terminal, plant-type||Leucine-rich repeat domain superfamily	171.328601940585	17.1027186535677	3.28257617869681	2.42015853930689e-05	0.00420040007771963
TraesCS1B03G1226400LC	1B:680955942-680956838|-	--	--	98.9861940399654	9.81158619635834	3.28589727110278	7.70854146254608e-05	0.010475448398109
TraesCS7D03G0356600LC	7D:110386936-110387514|-	--	--	294.661160023933	29.367157210494	3.2887647400378	1.39958885402242e-05	0.00272521403429942
TraesCS2B03G0916400LC	2B:514425305-514426125|+	--	--	53.9543111083609	5.28224703726845	3.28999957252125	0.000228284897622069	0.0245355678040545
TraesCS6B03G0952900	6B:599649689-599653110|-	--	Major intrinsic protein||Major intrinsic protein, conserved site||Aquaporin-like||Aquaporin transporter	55.5923573792684	5.43965450479555	3.29163824858817	0.000415922433686873	0.0382656228429859
TraesCS7B03G0602700LC	7B:396252638-396252982|-	--	--	159.969799601982	15.8467411118054	3.29290619554346	2.94738186780085e-05	0.00492071266704894
TraesCS7B03G1133600	7B:697924919-697929926|+	--	Peptidase S28||Alpha/Beta hydrolase fold||Serine carboxypeptidase S28, SKS domain	43.5607358857031	4.23089896547729	3.2941239787755	0.000458790521398597	0.0414730462515384
TraesCS2D03G1195900	2D:622399694-622404281|+	--	Protein kinase domain||S-locus glycoprotein domain||Bulb-type lectin domain||PAN/Apple domain||Serine/threonine-protein kinase, active site||Protein kinase-like domain superfamily||Protein kinase, ATP binding site||S-receptor-like serine/threonine-protein kinase||Bulb-type lectin domain superfamily	43.5420756313088	4.22579762981476	3.29519884750832	0.000458790521398597	0.0414730462515384
TraesCS6D03G0039100	6D:8489302-8491148|+	--	Chalcone/stilbene synthase, N-terminal||Polyketide synthase, type III||Chalcone/stilbene synthase, C-terminal||Thiolase-like	2282.40006343088	226.08017319509	3.30234998170482	4.44102723031304e-06	0.00107114685710516
TraesCSU03G0059900	Un:32051509-32054426|+	--	NB-ARC||P-loop containing nucleoside triphosphate hydrolase||Leucine-rich repeat domain superfamily||Winged helix-like DNA-binding domain superfamily||Rx, N-terminal||Apoptotic protease-activating factors, helical domain	107.908622216722	10.5644940745369	3.30486785260621	6.65549509111004e-05	0.00944372271544954
TraesCS4A03G0125700LC	4A:59871358-59873571|-	--	--	64.959171033677	6.29977066231361	3.30840289982005	0.000287576300088661	0.0293540233201409
TraesCS3A03G0319900LC	3A:128217467-128219845|+	--	--	339.355542506851	33.3702346838246	3.30878980269695	1.08990775700335e-05	0.00222963031639735
TraesCS5B03G0541200	5B:372231340-372233899|-	--	GroES-like superfamily||Alcohol dehydrogenase, C-terminal||Alcohol dehydrogenase, N-terminal||Polyketide synthase, enoylreductase domain||NAD(P)-binding domain superfamily	775.202728104441	76.3058246127386	3.3100251981195	5.702021278075e-06	0.00132613007509964
TraesCS3A03G0090000	3A:24541836-24544066|+	--	Nucleoside phosphatase GDA1/CD39	290.596026495909	28.5241340012497	3.31057367669002	1.23750066914327e-05	0.00245074742762182
TraesCS5A03G1073100	5A:637191481-637192816|-	--	Chlorophyll A-B binding protein, plant and chromista||Chlorophyll A-B binding protein||Chlorophyll a/b binding domain superfamily	408.916884189683	40.1450774832403	3.31194414477762	9.22178416153818e-06	0.00196016186687803
TraesCS1A03G0405200	1A:260757846-260768507|-	--	Fatty acid hydroxylase||Uncharacterised domain Wax2, C-terminal	54.9008779699111	5.28224703726845	3.31503253333785	0.000228284897622069	0.0245355678040545
TraesCS2B03G1275100LC	2B:712156187-712157792|+	--	--	76.6719157855655	7.39514585217584	3.31997023577777	0.000159943402805583	0.0187726721170443
TraesCS4D03G0701000	4D:465943430-465947684|+	--	Very-long-chain 3-ketoacyl-CoA synthase||FAE1/Type III polyketide synthase-like protein||3-Oxoacyl-[acyl-carrier-protein (ACP)] synthase III, C-terminal||Thiolase-like	1828.99867105122	178.84603862014	3.32078067544755	4.14485944599792e-06	0.0010203863891627
TraesCS1D03G0056400	1D:12064527-12068688|+	--	Protein kinase domain||Protein kinase-like domain superfamily||Protein kinase, ATP binding site||Adaptor protein Cbl, N-terminal domain superfamily	44.488642492859	4.22579762981476	3.32613707073745	0.000395255096106125	0.0368665207822622
TraesCS2B03G1223800	2B:690277573-690279273|-	--	Cytochrome P450||Cytochrome P450, E-class, group I||Cytochrome P450, conserved site||Cytochrome P450 superfamily	254.080848498669	24.6543003447465	3.32630554071909	1.35132529026534e-05	0.00263894241896912
TraesCS5B03G0380200	5B:260144934-260154344|-	--	Major facilitator superfamily||Major facilitator superfamily domain||MFS transporter superfamily	628.584	60.8499487830913	3.33355764318362	6.0497294069547e-06	0.00139003084978401
TraesCS7B03G1329400	7B:760093189-760098170|+	--	NB-ARC||AAA+ ATPase domain||P-loop containing nucleoside triphosphate hydrolase||Leucine-rich repeat domain superfamily||Winged helix-like DNA-binding domain superfamily	55.8474448314613	5.28224703726845	3.33963853199435	0.000201479535327098	0.0223107849082012
TraesCS5D03G1130000LC	5D:543161837-543170280|-	--	--	155.236965294231	14.7902917043517	3.34835353183135	2.44087196500001e-05	0.00422261352388717
TraesCS1D03G0588900	1D:334948776-334954706|+	--	NB-ARC||P-loop containing nucleoside triphosphate hydrolase||Leucine-rich repeat domain superfamily||Winged helix-like DNA-binding domain superfamily||Virus X resistance protein-like, coiled-coil domain||Rx, N-terminal||Apoptotic protease-activating factors, helical domain	46.2844057336535	4.29905523220777	3.35896924264549	0.000295196772535789	0.0295265906619619
TraesCS1D03G0122300	1D:39356139-39362769|-	--	Kinesin motor domain||Kinesin motor domain, conserved site||P-loop containing nucleoside triphosphate hydrolase||Kinesin motor domain superfamily	135.69137249644	12.813918211964	3.35947903880226	3.08379550994181e-05	0.005125441060636
TraesCS2D03G0070800LC	2D:14405571-14406169|+	--	--	56.7940116930115	5.28224703726845	3.36383188911211	0.000368942350903677	0.0355047119506006
TraesCS7B03G0605100LC	7B:397553054-397553371|+	--	--	56.7940116930115	5.28224703726845	3.36383188911211	0.000368942350903677	0.0355047119506006
TraesCS6B03G0179100	6B:56990987-56996443|-	--	NB-ARC||AAA+ ATPase domain||P-loop containing nucleoside triphosphate hydrolase||Leucine-rich repeat domain superfamily||Winged helix-like DNA-binding domain superfamily||Rx, N-terminal||Apoptotic protease-activating factors, helical domain	174.855429889196	16.4069561216204	3.37143147904315	2.11277981260414e-05	0.00378258485107571
TraesCS1A03G0055800	1A:13445163-13449063|-	--	Protein kinase domain||Serine-threonine/tyrosine-protein kinase, catalytic domain||Leucine-rich repeat||Leucine-rich repeat, typical subtype||Serine/threonine-protein kinase, active site||Protein kinase-like domain superfamily||Leucine-rich repeat-containing N-terminal, plant-type||Protein kinase, ATP binding site||Leucine-rich repeat domain superfamily	102.229221047421	9.50804466708322	3.37711351938258	6.17396656630294e-05	0.00885466301734932
TraesCS6B03G0704200LC	6B:431342229-431342561|-	--	--	136.305628063228	12.6773928894443	3.38129464286096	2.91338812768911e-05	0.00489097178692477
TraesCS4A03G0662000LC	4A:563659071-563661365|-	--	--	158.849940866313	14.7902917043517	3.38151930700825	2.10218433428272e-05	0.00377120842645097
TraesCS6A03G0479400LC	6A:237665579-237669416|-	--	--	46.3817762159594	4.22579762981476	3.38609156151177	0.000295196772535789	0.0295265906619619
TraesCS1A03G0647700	1A:444295839-444301358|+	--	Sulfotransferase domain||P-loop containing nucleoside triphosphate hydrolase	69.099380893164	6.33869644472215	3.3886581646438	0.000171134443120472	0.0196183171666597
TraesCS1B03G0023400	1B:6304315-6310761|+	--	NB-ARC||P-loop containing nucleoside triphosphate hydrolase||Leucine-rich repeat domain superfamily||Winged helix-like DNA-binding domain superfamily||Rx, N-terminal||Apoptotic protease-activating factors, helical domain	80.4581832317663	7.39514585217584	3.38939965076226	0.000111091091266579	0.01407822304336
TraesCS7D03G0097100LC	7D:22561229-22563883|-	--	--	124.748342820585	11.478043217242	3.39552348663691	3.54337802241839e-05	0.00572691313375354
TraesCS4A03G0262900LC	4A:161844114-161845784|-	--	--	264.087470370368	24.3132734982249	3.40200108036528	9.89590984165615e-06	0.00206236946043765
TraesCS2D03G0999100LC	2D:559275259-559275747|-	--	--	104.122354770521	9.50804466708322	3.40355340340315	5.33857996229789e-05	0.00790738251384
TraesCS5A03G0609000	5A:457915787-457916917|+	--	Alpha/beta hydrolase fold-3||Alpha/Beta hydrolase fold||Lipase, GDXG, putative serine active site	498.69627808982	45.7639521620257	3.40977188876923	4.31801737002458e-06	0.00104855563207754
TraesCS1A03G0682600LC	1A:465600630-465600902|+	--	--	105.068921632071	9.50804466708322	3.41659382915232	4.96806698629752e-05	0.00742454649448026
TraesCS2B03G0618700LC	2B:287226443-287227922|-	--	--	186.473671725388	16.9031905192591	3.42150407580742	1.24860324071758e-05	0.00246359024033891
TraesCS2A03G0580000LC	2A:357518017-357519210|-	--	--	35.9695407389073	3.16934822236107	3.42190646765847	0.000571838217579205	0.0487811323694168
TraesCS5A03G0608000	5A:457541391-457543345|+	--	--	35.9695407389073	3.16934822236107	3.42190646765847	0.000571838217579205	0.0487811323694168
TraesCS7A03G1056700LC	7A:633761800-633763349|+	--	--	35.9695407389073	3.16934822236107	3.42190646765847	0.000571838217579205	0.0487811323694168
TraesCS7B03G0740800LC	7B:501687886-501689445|-	--	--	35.9695407389073	3.16934822236107	3.42190646765847	0.000571838217579205	0.0487811323694168
TraesCS6B03G0232100	6B:80892963-80897118|+	--	Very-long-chain 3-ketoacyl-CoA synthase||FAE1/Type III polyketide synthase-like protein||3-Oxoacyl-[acyl-carrier-protein (ACP)] synthase III, C-terminal||Thiolase-like	861.038302695935	78.3297252708779	3.42379900549425	2.91792699062846e-06	0.000774513635840844
TraesCS2B03G1278200	2B:713218693-713220985|+	--	NAD-dependent epimerase/dehydratase||NAD(P)-binding domain superfamily	349.283171912021	31.6934822236107	3.4244687680737	5.60100570184139e-06	0.00130491203582813
TraesCS7A03G1140500LC	7A:670806558-670807166|-	--	--	43.7815132760379	3.8565766817589	3.43107926840893	0.000458790521398597	0.0414730462515384
TraesCS4A03G0424900LC	4A:361175207-361176190|+	--	--	61.2452698992211	5.43508154643764	3.43223504833739	0.000206665216948021	0.0228187141030853
TraesCS5B03G0328900LC	5B:215995020-215995880|-	--	--	526.291175021907	47.5402233354161	3.43266037385942	3.76332397934736e-06	0.000943519083393517
TraesCS2B03G0597600	2B:261605836-261608224|-	--	Alpha crystallin/Hsp20 domain||HSP20-like chaperone||Small heat shock protein HSP20	2315.22553470738	209.448206299001	3.43312838686679	2.09490415344022e-06	0.000589490118113621
TraesCS7A03G1259800LC	7A:707170173-707171128|-	--	--	47.9252121481432	4.22579762981476	3.43319228535941	0.000222230629542814	0.0239911949562287
TraesCS7A03G0223600	7A:61158461-61161161|+	--	CRAL-TRIO lipid binding domain||CRAL/TRIO, N-terminal domain||CRAL/TRIO, N-terminal domain superfamily||CRAL-TRIO lipid binding domain superfamily	59.6337122776621	5.28224703726845	3.43406896046231	0.000259582277020547	0.0271128301558344
TraesCS2B03G0629900LC	2B:304314904-304315725|+	--	--	59.7068524789875	5.28224703726845	3.43583359802822	0.000259582277020547	0.0271128301558344
TraesCS2A03G0293300	2A:93479174-93479703|-	--	--	118.320857693774	10.5644940745369	3.43761387816895	3.40933190370693e-05	0.00555573230685925
TraesCS2A03G0006500	2A:1751281-1752992|+	--	Transferase||Chloramphenicol acetyltransferase-like domain superfamily	196.815990633123	17.6368161620813	3.43846848655228	1.17849010377311e-05	0.00235309895271343
TraesCS3B03G0991400LC	3B:642126190-642127486|-	--	--	99.2107523986221	8.82840369476424	3.43950302849592	4.49349655345369e-05	0.00688108576693057
TraesCS4B03G0641100	4B:488796120-488798998|-	--	Multi antimicrobial extrusion protein	134.493216525173	12.0058197650775	3.43974778320197	2.07249213891827e-05	0.00372044416539595
TraesCS2A03G0009500	2A:2440261-2441887|+	--	NB-ARC||P-loop containing nucleoside triphosphate hydrolase||Apoptotic protease-activating factors, helical domain	224.336346187395	20.0725387416201	3.4417542710376	8.24056226552174e-06	0.00178132259877654
TraesCSU03G0209800	Un:175179032-175180257|-	--	Chlorophyll A-B binding protein, plant and chromista||Chlorophyll A-B binding protein||Chlorophyll a/b binding domain superfamily	140.521013722366	12.5170740367437	3.44337809754132	2.32806505930365e-05	0.0040717130635791
TraesCS3D03G0705500LC	3D:425187720-425188031|+	--	--	48.2749099390598	4.22579762981476	3.44365359964255	0.000222230629542814	0.0239911949562287
TraesCS1A03G0009200	1A:2579251-2580660|+	--	Leucine-rich repeat domain superfamily	95.3117775091305	8.45159525962953	3.44377903024392	6.12016833583952e-05	0.00878695428023978
TraesCS5B03G0602300	5B:409006213-409011693|-	--	Leucine-rich repeat||NB-ARC||Leucine rich repeat 4||P-loop containing nucleoside triphosphate hydrolase||Leucine-rich repeat domain superfamily||Winged helix-like DNA-binding domain superfamily	49.3954568146367	4.32395142907169	3.44447540160923	0.000436420594175468	0.0398287915505466
TraesCS2B03G0762500LC	2B:415908353-415910893|-	--	--	620.905151156851	55.5298406201706	3.44754199967985	3.10075209873571e-06	0.000805276056182355
TraesCS4B03G0939500	4B:651634923-651637565|-	--	Nucleoside phosphatase GDA1/CD39	4045.7621023677	362.233350362421	3.44838579826992	1.78342733745714e-06	0.000513765741403959
TraesCS6B03G0705000LC	6B:431442380-431442751|+	--	--	41.868938340926	3.63676342642337	3.44879328849405	0.000533686413488453	0.0461030400460427
TraesCS5B03G0129800LC	5B:56833937-56834852|+	--	--	61.0571881847044	5.35064132982647	3.44989170302958	0.000206665216948021	0.0228187141030853
TraesCS6A03G0990800LC	6A:610332321-610333901|-	--	--	36.7857476016892	3.16934822236107	3.45416576841775	0.000481146880057384	0.043157613222632
TraesCS7B03G0602500LC	7B:396251141-396251545|-	--	--	131.572793755477	11.6209434819906	3.45462655456624	2.47052098792795e-05	0.00426284721047645
TraesCS7D03G0635500LC	7D:276820118-276821404|-	--	--	84.2444506779671	7.39514585217584	3.4556406439431	7.81215532362794e-05	0.0105517496411696
TraesCS2B03G0048300	2B:12858646-12859579|+	--	PLAC8 motif-containing protein	464.684435623771	41.2015268906939	3.45897303107976	3.89059113243397e-06	0.000965093836596183
TraesCS4A03G0576500LC	4A:515611374-515661486|-	--	--	36.9161076004575	3.16934822236107	3.45925189109933	0.000481146880057384	0.043157613222632
TraesCS7D03G0635600LC	7D:276822009-276826418|-	--	--	43.6327725273953	3.75262354401797	3.46436709100595	0.000458790521398597	0.0414730462515384
TraesCS5D03G0505900LC	5D:327703337-327705522|-	--	--	335.621231351138	29.5805834087033	3.4660631119141	4.97056934681207e-06	0.00117862140351608
TraesCS5D03G0280600LC	5D:152946743-152947754|+	--	--	55.1686857376567	4.76224426473569	3.46795747138712	0.000201479535327098	0.0223107849082012
TraesCS1D03G1011200LC	1D:488609490-488610619|-	--	--	220.422099872272	19.2521727922349	3.47620063703224	9.5313818975446e-06	0.00199889263756997
TraesCS4B03G0768300	4B:576060156-576062975|-	--	Cytochrome P450||Cytochrome P450, E-class, group I||Cytochrome P450, conserved site||Cytochrome P450 superfamily	61.5268460007625	5.28224703726845	3.47906314567042	0.000206665216948021	0.0228187141030853
TraesCS2A03G1344700LC	2A:780493878-780498447|-	--	--	242.321116556849	21.1289881490738	3.47939082264303	8.24614233763573e-06	0.00178132259877654
TraesCS2A03G0791500LC	2A:550957146-550958965|-	--	--	363.481674835274	31.6934822236107	3.48193391729715	4.04829431693049e-06	0.000999003692862515
TraesCS4A03G0760000	4A:597281487-597283606|+	--	Methyltransferase type 11||S-adenosyl-L-methionine-dependent methyltransferase||SAM-binding methyltransferase MPBQ/MBSQ||Methyltransferase domain 25	1978.3832643988	172.584131416218	3.48542335074265	1.63654839295512e-06	0.000482392982657137
TraesCS6A03G0944200	6A:598999440-599001965|+	--	Pentatricopeptide repeat||Tetratricopeptide-like helical domain superfamily	49.8559166759478	4.22579762981476	3.49002552021133	0.000168570590264378	0.0193327614122017
TraesCS3A03G0433400	3A:221752942-221754440|+	--	--	98.4429536012199	8.45159525962953	3.49035182507559	4.49349655345369e-05	0.00688108576693057
TraesCSU03G0065100LC	Un:33720722-33721747|+	--	--	268.824988680254	23.2418869639812	3.4923216908549	6.44572320592596e-06	0.00145593659814802
TraesCS3D03G0137500LC	3D:31709068-31709914|+	--	--	46.7699237619038	3.94456602620119	3.49452543294126	0.000295196772535789	0.0295265906619619
TraesCS2B03G0362900LC	2B:124282865-124283546|-	--	--	129.350730753096	11.081393891415	3.49792768892758	1.71218995637162e-05	0.0031807788564855
TraesCS6B03G0363200	6B:149758056-149759839|-	--	UDP-glucuronosyl/UDP-glucosyltransferase||UDP-glycosyltransferase family, conserved site	50.1680436621602	4.22579762981476	3.49900681985127	0.000168570590264378	0.0193327614122017
TraesCS5B03G1189000	5B:659537118-659538475|-	--	Chalcone isomerase||Chalcone isomerase, 3-layer sandwich||Chalcone isomerase, orthogonal bundle domain superfamily||Chalcone isomerase superfamily||Chalcone--flavonone isomerase	62.4734128623127	5.28224703726845	3.5010447273382	0.000184741489710152	0.0208732061817366
TraesCS4A03G0175000LC	4A:90432924-90433549|-	--	--	43.8731572029189	3.65672706443911	3.50841399015578	0.000395255096106125	0.0368665207822622
TraesCS5B03G0519800	5B:355720217-355722232|+	--	Six-bladed beta-propeller, TolB-like||Strictosidine synthase, conserved region	50.5847500337503	4.22579762981476	3.51091084737096	0.000168570590264378	0.0193327614122017
TraesCS4B03G0464300LC	4B:353134472-353135382|+	--	--	39.0492823237624	3.22193341638826	3.51717075698741	0.000343490952083702	0.0334414767802366
TraesCS2B03G1239500	2B:698624583-698628572|+	--	CDP-alcohol phosphatidyltransferase||CDP-diacylglycerol-inositol 3-phosphatidyltransferase, eukaryote||CDP-alcohol phosphotransferase, transmembrane domain	595.225537666239	50.6103533489713	3.52013815299201	2.14686838448163e-06	0.000598962721521691
TraesCS2B03G0946800LC	2B:532796446-532797796|+	--	--	162.809500186633	13.733842296898	3.52300959198812	1.14289607280649e-05	0.00230271115092039
TraesCS3B03G0926600	3B:594432922-594437157|-	--	Exostosin-like||Exostosin, GT47 domain	160.827069295744	13.5501504720905	3.52460110577078	1.26120642593182e-05	0.00248478158184323
TraesCS5B03G1204500	5B:663931386-663935684|+	--	NB-ARC||P-loop containing nucleoside triphosphate hydrolase||Leucine-rich repeat domain superfamily||Winged helix-like DNA-binding domain superfamily	51.1146105237104	4.22579762981476	3.52590685786379	0.00014721498184444	0.0175473943506804
TraesCS6D03G0908900LC	6D:490379203-490384191|+	--	--	287.756325911258	24.2983363714349	3.52665834648742	4.86022780131021e-06	0.00115967295910332
TraesCS4A03G0773500	4A:601048153-601050234|-	--	Cytochrome P450||Cytochrome P450, E-class, group I||Cytochrome P450, conserved site||Cytochrome P450 superfamily	611.969370114646	51.7660209652309	3.52765822285368	2.30205159041445e-06	0.000634395952746859
TraesCS2A03G0549200LC	2A:323361396-323362580|-	--	--	38.8092413235579	3.16934822236107	3.53116200156806	0.000343490952083702	0.0334414767802366
TraesCS1A03G0068800	1A:15646443-15648744|-	--	SAM dependent carboxyl methyltransferase||S-adenosyl-L-methionine-dependent methyltransferase||Methyltransferase, alpha-helical capping domain	277.340293677637	23.2418869639812	3.53729089989204	5.06755996696531e-06	0.00119885524680083
TraesCS2B03G1090300	2B:623098298-623100621|-	--	HAD hydrolase, subfamily IA||Phosphoglycolate phosphatase-like, domain 2||HAD superfamily||HAD-like superfamily||Haloacid dehalogenase-like hydrolase	965.852044494202	80.4852168606241	3.55039767633162	1.5032279907894e-06	0.000448045920472604
TraesCS2D03G0742900	2D:416656231-416657183|+	--	Oxygen-evolving enhancer protein 3||PsbQ-like domain superfamily	77.6938819609476	6.33869644472215	3.5574955403903	7.8445642899417e-05	0.0105794538421883
TraesCS7B03G1334700	7B:762326223-762330782|+	--	Rx, N-terminal	373.893910312326	30.637032816157	3.57138310530592	2.57163033582562e-06	0.000695122558578807
TraesCS4A03G0567300LC	4A:510207829-510209354|-	--	--	53.0077442468107	4.22579762981476	3.57824742965904	0.000112864951058952	0.0142152286801162
TraesCS2B03G1035900LC	2B:585411806-585414180|-	--	--	700.388380358865	57.0861422002806	3.58150083684456	1.474932845884e-06	0.000440596960770456
TraesCS6D03G0241000LC	6D:98188911-98189442|-	--	--	134.164735890602	10.8030982834067	3.58687980486176	1.27049659921074e-05	0.00249939286729687
TraesCS6D03G0725200	6D:442221525-442227270|+	--	Sugar/inositol transporter||Major facilitator, sugar transporter-like||Major facilitator superfamily domain||MFS transporter superfamily	475.607794127718	38.3974784708696	3.59385692478896	1.84442941588581e-06	0.000530193955799244
TraesCS1D03G0135300LC	1D:44949805-44952900|-	--	--	261.967247886838	21.0736583466688	3.59556176395013	4.45029017228998e-06	0.00107144350754519
TraesCSU03G0108800LC	Un:56282253-56283278|-	--	--	40.7023750466582	3.16934822236107	3.59965733730146	0.000291391498341904	0.0293965810062674
TraesCS2B03G1036000LC	2B:585414203-585415701|-	--	--	169.324758643034	13.5225524154072	3.60174187550991	8.15550261050709e-06	0.00177163019249094
TraesCS7B03G0602600LC	7B:396251551-396252033|-	--	--	513.039238960204	41.2015268906939	3.60175397738199	1.70335017111438e-06	0.00049605424852235
TraesCS7D03G0848900	7D:464132734-464135536|+	--	At3g27210-like	67.2062471700636	5.28224703726845	3.60619298421695	0.000107310678925825	0.0136836504351114
TraesCS7B03G0086300	7B:34673190-34676371|+	--	Multi antimicrobial extrusion protein	67.4787741643151	5.28224703726845	3.6120204886226	0.000107310678925825	0.0136836504351114
TraesCS2A03G1343000	2A:780109009-780115136|-	--	Protein kinase domain||NB-ARC||Serine/threonine-protein kinase, active site||Protein kinase-like domain superfamily||Protein kinase, ATP binding site||P-loop containing nucleoside triphosphate hydrolase||Leucine-rich repeat domain superfamily||Winged helix-like DNA-binding domain superfamily||Virus X resistance protein-like, coiled-coil domain||Rx, N-terminal||Apoptotic protease-activating factor…	159.969799601982	12.6773928894443	3.61205174189238	8.53947945647048e-06	0.00183413167456366
TraesCS3D03G0048300	3D:9262697-9264364|+	--	EamA domain||WAT1-related protein	147.457690027765	11.6209434819906	3.61891754697463	1.00054464417568e-05	0.00207708396327084
TraesCS2B03G1572800	2B:811797174-811802349|-	--	NB-ARC||P-loop containing nucleoside triphosphate hydrolase||Leucine-rich repeat domain superfamily||Winged helix-like DNA-binding domain superfamily	156.106403705759	12.2902045404622	3.62112137031379	9.94083551928217e-06	0.00206850022084533
TraesCS2B03G0378200LC	2B:134619750-134621931|-	--	--	94.6566861550192	7.39514585217584	3.62352611479014	3.40324641818621e-05	0.00555259947715812
TraesCS5B03G0095200	5B:41823798-41828996|-	--	Peptidase S8/S53 domain||Peptidase S8 propeptide/proteinase inhibitor I9||Peptidase S8, subtilisin-related||Cucumisin-like catalytic domain||Peptidase S8/S53 domain superfamily||Peptidase S8 propeptide/proteinase inhibitor I9 superfamily||Peptidase S8, subtilisin, Ser-active site||Subtilisin-like protease, fibronectin type-III domain	2281.71215324971	180.592712499258	3.62581181179104	7.02349668614762e-07	0.000243007519584532
TraesCS4B03G0943100	4B:652796342-652801632|-	--	Myc-type, basic helix-loop-helix (bHLH) domain||Achaete-scute transcription factor-related||Helix-loop-helix DNA-binding domain superfamily	702.012375338904	55.442999878292	3.62688463307889	1.10873650043937e-06	0.00034919309192114
TraesCS3A03G0773500	3A:567193383-567196382|+	--	NB-ARC||P-loop containing nucleoside triphosphate hydrolase||Winged helix-like DNA-binding domain superfamily	108.855189078272	8.45159525962953	3.6352255463455	2.15674521014317e-05	0.00385353886307965
TraesCS2B03G0524800	2B:212853925-212855661|+	--	Ribosome-inactivating protein superfamily	257.466186341652	20.0725387416201	3.64036953332433	2.66941571093697e-06	0.000717836023235431
TraesCS1A03G0410200	1A:266090673-266094866|-	--	Ribonuclease T2-like||Ribonuclease T2, eukaryotic||Ribonuclease T2-like superfamily	231.949826701948	17.9596399267127	3.64930564454363	3.11184680310166e-06	0.000806721334495044
TraesCS4D03G0400100LC	4D:270861914-270863021|+	--	--	105.068921632071	8.05965863003549	3.65170781985309	1.57787325589408e-05	0.00299156694912796
TraesCS3A03G1075800	3A:697772249-697772524|-	--	--	55.8474448314613	4.22579762981476	3.65336139140473	8.71099895352171e-05	0.0115551769310863
TraesCS6A03G0727700	6A:501707715-501709661|-	--	Myc-type, basic helix-loop-helix (bHLH) domain||Basic helix-loop-helix leucine zipper transcription factor||Helix-loop-helix DNA-binding domain superfamily	42.3038630270322	3.16934822236107	3.65516501759269	0.000211308443188638	0.0232448001257737
TraesCS6A03G0221700	6A:66443136-66443261|-	--	--	52.2504907575706	3.93767506414558	3.65642782722754	0.000128790535364493	0.0156805856749576
TraesCS6D03G0177100	6D:70667261-70667386|+	--	--	52.2504907575706	3.93767506414558	3.65642782722754	0.000128790535364493	0.0156805856749576
TraesCS1D03G0475600LC	1D:258822341-258825106|-	--	--	56.032971910854	4.22579762981476	3.6581353642795	7.67127580995918e-05	0.0104514276561017
TraesCS5D03G0057900LC	5D:21113688-21116032|+	--	--	53.9396026080888	4.05518768427336	3.6610648649979	9.90739647968148e-05	0.0127775390709082
TraesCS7A03G0965100LC	7A:581603819-581604172|-	--	--	42.5955087697586	3.16934822236107	3.6650475617692	0.000211308443188638	0.0232448001257737
TraesCS6D03G0679500	6D:416277230-416280718|-	--	Major intrinsic protein||Major intrinsic protein, conserved site||Aquaporin-like||Aquaporin transporter	57.9440702547464	4.34563138288148	3.66719992884861	0.000139734195837431	0.0167607807929059
TraesCS2A03G0348400LC	2A:125347644-125348789|-	--	--	193.287523954365	14.6678865132581	3.67628924632097	4.43566743095846e-06	0.00107082230215609
TraesCS3B03G0141900	3B:44104004-44104351|-	--	Plant lipid transfer protein/Par allergen||Bifunctional inhibitor/plant lipid transfer protein/seed storage helical domain||Bifunctional inhibitor/plant lipid transfer protein/seed storage helical domain superfamily	39.7838459709936	2.92079789512829	3.68006272421069	0.000291391498341904	0.0293965810062674
TraesCS1D03G0232600	1D:89371426-89377052|+	--	NB-ARC||P-loop containing nucleoside triphosphate hydrolase||Leucine-rich repeat domain superfamily||Winged helix-like DNA-binding domain superfamily	101.768649613826	7.61824	3.68572316391483	1.97519709901283e-05	0.00357222764835703
TraesCS3D03G0888100	3D:517933834-517936834|-	--	SWEET sugar transporter||Sugar transporter SWEET1a	157.937891679601	11.8798585459039	3.68643175638646	5.90823311997329e-06	0.00136693865315184
TraesCS2D03G0175600	2D:40324090-40328438|+	--	Protein kinase domain||Leucine-rich repeat||Leucine-rich repeat, typical subtype||Serine/threonine-protein kinase, active site||Protein kinase-like domain superfamily||Protein kinase, ATP binding site||Leucine-rich repeat domain superfamily	43.5420756313088	3.18986812481181	3.68770085636604	0.000180605779350561	0.0205014458295981
TraesCS3A03G0939900	3A:647577278-647578078|-	--	Leucine-rich repeat||Leucine-rich repeat-containing N-terminal, plant-type||Leucine-rich repeat domain superfamily	141.985029232529	10.6232991980889	3.69247613825736	8.02088076056369e-06	0.00174522850871776
TraesCS6A03G0845300LC	6A:563210357-563211581|+	--	--	68.0384636725004	4.98782671060103	3.70471401507799	4.49665270486046e-05	0.00688196830492585
TraesCS7D03G1298800	7D:641278341-641279744|+	--	NB-ARC||AAA+ ATPase domain||P-loop containing nucleoside triphosphate hydrolase||Rx, N-terminal	57.9207712384622	4.22579762981476	3.70583454147963	6.76615968051854e-05	0.00954995109193189
TraesCS2B03G1143500LC	2B:651156448-651165429|+	--	--	326.480448838711	24.2983363714349	3.70873231896949	1.72990257584554e-06	0.000499425120273328
TraesCS3D03G1114200LC	3D:595627004-595627438|+	--	--	58.0690661089384	4.22579762981476	3.70951555458166	5.97690312060348e-05	0.00860906412771158
TraesCS2B03G1250800	2B:701830469-701833201|+	--	Leucine-rich repeat domain superfamily	426.901654559136	31.6934822236107	3.71388068406555	1.07641526420186e-06	0.000341026764701291
TraesCS2D03G0156600LC	2D:36190505-36191455|+	--	--	80.917261366522	5.83773962918646	3.7324643844796	2.94954999048255e-05	0.00492071266704894
TraesCS4B03G0205100LC	4B:94958795-94959509|-	--	--	88.0307181241678	6.33869644472215	3.73742695371466	3.19327223513294e-05	0.00528508852544648
TraesCS1D03G0664800	1D:375073125-375075851|+	--	Solute carrier family 35 member SLC35F1/F2/F6	189.158749219095	13.733842296898	3.73926662169574	3.43982728998761e-06	0.000881468134368005
TraesCS1A03G0699700	1A:473803481-473808563|+	--	Solute carrier family 35 member SLC35F1/F2/F6	88.1853412151111	6.33869644472215	3.73995515810897	3.19327223513294e-05	0.00528508852544648
TraesCS5B03G0835100	5B:519686990-519688044|+	--	Major intrinsic protein||Major intrinsic protein, conserved site||Aquaporin-like||Aquaporin transporter	388.412086650624	28.1726726802389	3.74679831597485	1.16564790702998e-06	0.000364108004308334
TraesCS6B03G0158100LC	6B:49995599-49996357|-	--	--	59.6337122776621	4.22579762981476	3.74779181987268	5.28754825309144e-05	0.00784486302555435
TraesCS7B03G0602100LC	7B:396243060-396246283|-	--	--	4025.74886217297	292.636485864672	3.74892466063247	3.02078159285148e-07	0.000120813148082318
TraesCS3B03G0265400	3B:94589417-94591552|-	--	Peptidase S10, serine carboxypeptidase||Alpha/Beta hydrolase fold	88.977284985718	6.33869644472215	3.75283503299949	2.93101924481316e-05	0.00490206077583924
TraesCS2A03G0708700	2A:480083860-480088134|+	--	Nodulin-like||MFS transporter superfamily	175.113785719085	12.5438804614637	3.7575729664865	4.12562504184611e-06	0.00101714578203592
TraesCS6D03G0853800	6D:477945021-477946244|+	--	Glutathione S-transferase, N-terminal||Glutathione S-transferase, C-terminal-like||Glutathione S-transferase Omega/GSH||Thioredoxin-like superfamily||Glutathione S-transferase, C-terminal domain superfamily||Glutathione Transferase family	124.960476033824	8.89323153930511	3.76161867755242	7.36277346020292e-06	0.00163538172210136
TraesCS2A03G1115200	2A:719835757-719852399|+	--	Leucine-rich repeat||Leucine-rich repeat, typical subtype||Leucine-rich repeat domain superfamily	250.840218310801	17.9596399267127	3.76220250096798	1.67003162117654e-06	0.000490636162186182
TraesCS7A03G0098200LC	7A:20988483-20989229|-	--	--	163.756067048183	11.6209434819906	3.77004210943621	4.36184049557891e-06	0.00105682522307051
TraesCS2B03G0569800	2B:244431215-244437347|-	--	Cellulose synthase||Nucleotide-diphospho-sugar transferases	31.105404800916	2.11289881490738	3.77127879896522	0.000497338167391159	0.0441497269661449
TraesCS6B03G0592400	6B:314556910-314570803|+	--	2-succinyl-5-enolpyruvyl-6-hydroxy-3-cyclohexene-1-carboxylic-acid synthase||Thiamine pyrophosphate enzyme, C-terminal TPP-binding||DHS-like NAD/FAD-binding domain superfamily||Thiamin diphosphate-binding fold||Menaquinone biosynthesis protein MenD, middle domain||Thiamine pyrophosphate enzyme, N-terminal TPP-binding domain	33.4331505018358	2.26835011491643	3.77803026695505	0.000336207055238845	0.0328566828490472
TraesCS7D03G0112300LC	7D:27113771-27114637|-	--	--	120.213991416874	8.45159525962953	3.77826238923135	1.01785969664328e-05	0.0021064720921378
TraesCS2B03G1095300	2B:625250651-625252388|-	--	--	77.0175393426675	5.34172077270529	3.78665403779484	4.3146724515436e-05	0.00665307527846111
TraesCS4A03G0990600	4A:675185854-675188416|+	--	Spermidine/spermine synthases||S-adenosyl-L-methionine-dependent methyltransferase||Polyamine biosynthesis domain||Spermidine synthase, tetramerisation domain||Spermidine synthase, tetramerisation domain superfamily	46.3817762159594	3.16934822236107	3.78755652793175	0.000114340178288936	0.0143535933931089
TraesCS3B03G1377500	3B:804236494-804238292|+	--	GPI-anchored protein LORELEI-like	62.4938443256746	4.30680542435698	3.78861360192378	8.74549500921078e-05	0.0115894100777798
TraesCS5D03G1075700	5D:527784850-527787085|+	--	Protein kinase domain||Legume lectin domain||Serine/threonine-protein kinase, active site||Protein kinase-like domain superfamily||Concanavalin A-like lectin/glucanase domain superfamily||Protein kinase, ATP binding site	61.5268460007625	4.22579762981476	3.7927860050808	4.15608844440965e-05	0.00644580321762046
TraesCS7D03G1243200	7D:625232278-625234380|+	--	Protein of unknown function DUF594||Domain of unknown function DUF4220	61.5268460007625	4.22579762981476	3.7927860050808	4.15608844440965e-05	0.00644580321762046
TraesCS5A03G1245100	5A:692946609-692973660|+	--	Myc-type, basic helix-loop-helix (bHLH) domain||Achaete-scute transcription factor-related||Helix-loop-helix DNA-binding domain superfamily	378.626744620077	26.4112351863423	3.80272401346538	8.51017433892683e-07	0.000284126921983995
TraesCS2D03G0656800LC	2D:359198619-359201163|+	--	--	46.9674600169307	3.16934822236107	3.80561123727908	9.86135179196441e-05	0.0127452238567075
TraesCS1B03G0967900	1B:591010477-591014213|+	--	Transferase||Chloramphenicol acetyltransferase-like domain superfamily	70.0861734758951	4.77905242798936	3.80758214874661	3.63587995807517e-05	0.00580435270865429
TraesCS3D03G0705800	3D:425475183-425479530|-	--	Oxygen oxidoreductase covalent FAD-binding site||FAD linked oxidase, N-terminal||Cytokinin dehydrogenase 1, FAD/cytokinin binding domain||FAD-linked oxidase-like, C-terminal||FAD-binding domain, PCMH-type||FAD-binding, type PCMH, subdomain 1||FAD-binding, type PCMH, subdomain 2||Cytokinin dehydrogenase, C-terminal domain superfamily||FAD-binding, type PCMH-like superfamily	245.347386014348	17.0079872440651	3.80827153237979	1.35919771164982e-06	0.000415435291931271
TraesCS2B03G1277300	2B:712790625-712792710|+	--	NAD-dependent epimerase/dehydratase||NAD(P)-binding domain superfamily	198.940097745773	13.7528145170115	3.8099820512138	2.24550033765497e-06	0.000620735409401907
TraesCS5A03G0768200	5A:528187905-528190022|-	--	Cytochrome P450||Cytochrome P450, E-class, group I||Cytochrome P450, conserved site||Cytochrome P450 superfamily	138.198761786328	9.50804466708322	3.81158773895431	5.91476654515889e-06	0.00136726440518768
TraesCS3D03G0772900	3D:460280267-460284992|+	--	Cytochrome b245, heavy chain||EF-hand domain||EF-hand domain pair||FAD-binding 8||Ferric reductase, NAD binding domain||Ferric reductase transmembrane component-like domain||NADPH oxidase Respiratory burst||FAD-binding domain, ferredoxin reductase-type||Riboflavin synthase-like beta-barrel||EF-Hand 1, calcium-binding site||Ferredoxin-NADP reductase (FNR), nucleotide-binding domain	336.973113359096	23.3066993737481	3.81415474611688	1.00556548134202e-06	0.000323576173465377
TraesCS2D03G0549100LC	2D:277097480-277098818|-	--	--	47.3283430775096	3.16934822236107	3.81662461117088	9.86135179196441e-05	0.0127452238567075
TraesCS4B03G0860400	4B:621697449-621710573|+	--	ABC transporter-like||AAA+ ATPase domain||ABC-2 type transporter||Plant PDR ABC transporter associated||ABC transporter-like, conserved site||P-loop containing nucleoside triphosphate hydrolase||ABC-transporter, N-terminal domain||ATP-binding cassette transporter, PDR-like subfamily G, domain 2||ABC transporter family G domain	47.3283430775096	3.16934822236107	3.81662461117088	9.86135179196441e-05	0.0127452238567075
TraesCS7A03G0088300LC	7A:19082503-19084194|+	--	--	47.3283430775096	3.16934822236107	3.81662461117088	9.86135179196441e-05	0.0127452238567075
TraesCS5B03G1305200LC	5B:694111273-694111935|-	--	--	32.1040559111501	2.11289881490738	3.81668782129705	0.000408153490325432	0.0376483489208895
TraesCS2B03G0495800	2B:192965627-192966499|+	--	--	32.1832732927065	2.11289881490738	3.82022941601585	0.000408153490325432	0.0376483489208895
TraesCS3D03G0875100	3D:512216783-512219692|+	--	Protein kinase domain||S-locus glycoprotein domain||Bulb-type lectin domain||PAN/Apple domain||Serine/threonine-protein kinase, active site||Protein kinase-like domain superfamily||Protein kinase, ATP binding site||S-receptor-like serine/threonine-protein kinase||Bulb-type lectin domain superfamily	32.1832732927065	2.11289881490738	3.82022941601585	0.000408153490325432	0.0376483489208895
TraesCS4A03G0990100LC	4A:674956577-674960504|-	--	--	32.1832732927065	2.11289881490738	3.82022941601585	0.000408153490325432	0.0376483489208895
TraesCS2A03G0415800LC	2A:176344740-176346664|+	--	--	92.3631955318122	6.2190206013208	3.8336102104864	1.01896615797737e-05	0.00210712722714761
TraesCS1B03G0956400	1B:586805048-586806481|-	--	O-methyltransferase domain||Plant methyltransferase dimerisation||O-methyltransferase COMT-type||S-adenosyl-L-methionine-dependent methyltransferase||Winged helix-like DNA-binding domain superfamily||Winged helix DNA-binding domain superfamily	125.893392586175	8.45159525962953	3.84479191386337	6.90941788006739e-06	0.00154627207524059
TraesCS2D03G0128900	2D:29856431-29857631|-	--	Ribulose bisphosphate carboxylase small chain, domain||Ribulose-1,5-bisphosphate carboxylase small subunit, N-terminal||Ribulose bisphosphate carboxylase, small chain||Ribulose bisphosphate carboxylase, small subunit superfamily	5086.76093531685	345.377981151211	3.84743170357688	1.65131083610062e-07	7.27039639435541e-05
TraesCS3A03G0966100	3A:658112042-658113871|+	--	Amino acid transporter, transmembrane domain	213.112904130378	14.3567034462581	3.84774693161485	1.96317926328334e-06	0.000558770311747828
TraesCS6D03G0586200LC	6D:363125649-363130220|-	--	--	79.5116163702161	5.28224703726845	3.84834493591319	3.23953064212766e-05	0.00533772201416908
TraesCS5B03G1110100	5B:627471326-627474306|-	--	Domain of unknown function DUF1618	112.526701026836	7.5014093331399	3.8524644206589	8.8716877160272e-06	0.00189632324930081
TraesCS4A03G1235200LC	4A:750239039-750239713|+	--	--	436.108103396575	29.3094069028904	3.85702134109031	5.59928856363077e-07	0.000202875800659258
TraesCSU03G0250200LC	Un:198816051-198816479|+	--	--	43.6017982728613	2.82495513425366	3.85802125219041	0.000180605779350561	0.0205014458295981
TraesCS2D03G1310300	2D:648318712-648320751|+	--	--	1098.8336158543	73.9514585217584	3.85842393723013	2.40527419399219e-07	9.93236755401482e-05
TraesCS2A03G1125300LC	2A:722240909-722242674|-	--	--	33.1298401542567	2.11289881490738	3.86188865116253	0.000336207055238845	0.0328566828490472
TraesCS5A03G0099400	5A:37697428-37701386|+	--	SWEET sugar transporter	33.1298401542567	2.11289881490738	3.86188865116253	0.000336207055238845	0.0328566828490472
TraesCS7D03G1049200	7D:563790018-563792928|+	--	Domain of unknown function DUF642||Galactose-binding-like domain superfamily	33.1298401542567	2.11289881490738	3.86188865116253	0.000336207055238845	0.0328566828490472
TraesCS7B03G1197900LC	7B:717806480-717806737|-	--	--	49.2215	3.16934822236107	3.87306063343458	7.38123341637565e-05	0.0102124029817973
TraesCS2B03G1234100	2B:695504232-695509544|-	--	Flavin amine oxidase||Amine oxidase||FAD/NAD(P)-binding domain superfamily	3711.25672222945	247.385277772633	3.87381796446812	1.44118566614686e-07	6.50508778851668e-05
TraesCS2D03G0397700	2D:137122495-137124306|+	--	Tensin phosphatase, C2 domain||Protein-tyrosine phosphatase-like	46.4210990260378	2.95805834087033	3.88445696724242	0.000114340178288936	0.0143535933931089
TraesCS2B03G0432800LC	2B:160716592-160720297|+	--	--	50.1680436621602	3.16934822236107	3.90047178627124	6.40524009075373e-05	0.00915191133695482
TraesCS2D03G0963800	2D:542015195-542021702|-	--	RNA polymerase, alpha subunit||RNA polymerase, N-terminal||RNA polymerase Rpb1, domain 3||RNA polymerase Rpb1, domain 7||RNA polymerase Rpb1, domain 6||RNA polymerase Rpb1, domain 1||RNA polymerase Rpb1, domain 5||RNA polymerase Rpb1, domain 4||RNA polymerase Rpb1, funnel domain superfamily||RNA polymerase Rpb1, domain 7 superfamily||RNA polymerase Rpb1, domain 3 superfamily||RNA polymerase Rpb1,…	34.0764070158069	2.11468692321873	3.90122548685188	0.000277936388805081	0.0286817450977344
TraesCS2B03G1139000LC	2B:648620113-648620539|-	--	--	34.0764070158069	2.11289881490738	3.90237861976635	0.000277936388805081	0.0286817450977344
TraesCS4B03G0071100	4B:26811263-26812152|-	--	Protein of unknown function DUF538||At5g01610-like superfamily	31.2064505013395	1.92186760725166	3.9047667474462	0.000497338167391159	0.0441497269661449
TraesCS5B03G0700500	5B:457657546-457659290|+	--	NAD-dependent epimerase/dehydratase||NAD(P)-binding domain superfamily	1475.48228677558	96.1368960782859	3.90563808544161	1.53110457978954e-07	6.83272364136504e-05
TraesCS2D03G1166100	2D:614457098-614460440|-	--	Protein of unknown function DUF1677, Oryza sativa	230.621450618672	14.7902917043517	3.9190251641732	1.0302639274356e-06	0.000329080574685889
TraesCS1A03G0990900	1A:571592142-571593215|+	--	SANT/Myb domain||Homeobox-like domain superfamily	51.0977613333778	3.16934822236107	3.92689735349619	5.56909457589899e-05	0.00819421770031337
TraesCS3B03G0806300	3B:518584049-518586557|-	--	BURP domain	249.893651449251	15.8467411118054	3.93601176933204	7.97644412410972e-07	0.000268661140725696
TraesCS5A03G0733200LC	5A:510783984-510795022|+	--	--	35.0229738773571	2.11289881490738	3.94176317039081	0.000230560867986034	0.0246919801978269
TraesCS7D03G0147300	7D:37807955-37808691|+	--	--	201.618741510191	12.6773928894443	3.94564708884665	1.25391692849476e-06	0.000388495795406809
TraesCS2B03G1299600	2B:721057957-721061240|+	--	Adenosylhomocysteinase-like||S-adenosyl-L-homocysteine hydrolase, NAD binding domain||S-adenosyl-L-homocysteine hydrolase, conserved site||NAD(P)-binding domain superfamily||Adenosylhomocysteinase-like superfamily	1490.54388959331	94.2274900260354	3.94919385081597	1.28320948616834e-07	5.92230038979698e-05
TraesCS2B03G0391300	2B:142134369-142136563|-	--	Armadillo-like helical||Armadillo-type fold	240.293431054231	15.0832444634955	3.95019936688994	7.181370611212e-07	0.000245602874903451
TraesCS5A03G0194000LC	5A:93924291-93925460|-	--	--	52.0611773852605	3.16934822236107	3.95377945982465	4.85125899875822e-05	0.0073072944692758
TraesCS6B03G0628000	6B:352630831-352637972|-	--	Oxygen-evolving enhancer protein 3||PsbQ-like domain superfamily	475.21323867335	29.6879379630967	3.96244020266245	2.65694401331177e-07	0.000108174363525116
TraesCS6A03G0172300LC	6A:49037867-49039657|+	--	--	464.402456270892	28.9741262174705	3.96421439971246	3.26062438090104e-07	0.000128669254415556
TraesCS2B03G1235800	2B:696510324-696512788|-	--	Tyrosinase copper-binding domain||Uncharacterised domain, di-copper centre||Polyphenol oxidase||Polyphenol oxidase, central domain||Polyphenol oxidase, C-terminal	63.406105591442	3.82295245962963	3.97633621446187	3.28489568871413e-05	0.00539248476259311
TraesCS2B03G1444900	2B:775782989-775786381|-	--	Fibrillarin||Fibrillarin, conserved site||S-adenosyl-L-methionine-dependent methyltransferase	35.9695407389073	2.11289881490738	3.98010106055287	0.000191900543227432	0.0215352980228054
TraesCS4A03G0021000	4A:7120320-7123189|+	--	Cytochrome P450||Cytochrome P450, E-class, group I||Cytochrome P450, conserved site||Cytochrome P450 superfamily	35.9695407389073	2.11289881490738	3.98010106055287	0.000191900543227432	0.0215352980228054
TraesCSU03G0071400LC	Un:39100171-39101258|+	--	--	35.9695407389073	2.11289881490738	3.98010106055287	0.000191900543227432	0.0215352980228054
TraesCS2B03G0524900	2B:212992776-212995428|-	--	--	192.91962159355	11.677686771764	3.9993720568311	1.12978218821707e-06	0.000354983152566298
TraesCS4D03G0647300	4D:443432768-443434261|-	--	--	54.0353199367943	3.16934822236107	4.00734684008379	3.70145266171974e-05	0.00588087857081809
TraesCS7A03G0166300LC	7A:41177432-41177827|+	--	--	36.9161076004575	2.11289881490738	4.01744648399373	0.000160239070364784	0.0187726721170443
TraesCS2B03G1573300	2B:811873808-811875083|-	--	Protein kinase domain||Serine/threonine-protein kinase, active site||Protein kinase-like domain superfamily||Protein kinase, ATP binding site	983.742891322791	59.1611668174067	4.02015131060354	1.02991027663021e-07	4.97715335858469e-05
TraesCS5D03G1039700LC	5D:515689858-515690472|+	--	--	36.0635895591459	2.05484933918154	4.02180031966317	0.000191900543227432	0.0215352980228054
TraesCS2B03G0691900	2B:372640655-372644545|+	--	Amino acid transporter, transmembrane domain	293.023305208536	17.3802967032704	4.03332261837698	4.46717102120172e-07	0.000169752498805666
TraesCS4A03G1123200LC	4A:722288340-722289378|+	--	--	37.8626744620077	2.11289881490738	4.05384953140826	0.000134219518227546	0.0161791227665523
TraesCS7B03G0910300	7B:598091159-598096432|+	--	NB-ARC||P-loop containing nucleoside triphosphate hydrolase||Winged helix-like DNA-binding domain superfamily||Virus X resistance protein-like, coiled-coil domain||Rx, N-terminal||Apoptotic protease-activating factors, helical domain	37.8626744620077	2.11289881490738	4.05384953140826	0.000134219518227546	0.0161791227665523
TraesCS3A03G0929800LC	3A:644454125-644455330|+	--	--	38.8092413235579	2.11289881490738	4.08935659446246	0.000112764799798596	0.0142152286801162
TraesCS5A03G0705200	5A:496265254-496267113|-	--	Cytochrome P450||Cytochrome P450, E-class, group I||Cytochrome P450, conserved site||Cytochrome P450 superfamily	38.8092413235579	2.11289881490738	4.08935659446246	0.000112764799798596	0.0142152286801162
TraesCS1A03G0184700LC	1A:60912361-60912579|-	--	--	241.374549695299	13.733842296898	4.09073468161818	4.45445735414466e-07	0.000169510847901802
TraesCS2A03G0660500	2A:434775954-434780097|+	--	Amino acid transporter, transmembrane domain	330.484739507699	18.5389831501551	4.11434652861946	2.30377993800864e-07	9.60244275411225e-05
TraesCS5B03G0584200	5B:399507832-399508140|-	--	--	39.5337406769198	2.11289881490738	4.11595517354818	0.000112764799798596	0.0142152286801162
TraesCS2B03G1235700	2B:696492034-696495155|+	--	Aminomethyltransferase, folate-binding domain||Glycine cleavage system T protein||Glycine cleavage T-protein, C-terminal barrel domain||GTP-binding protein TrmE/Glycine cleavage system T protein, domain 1||Aminomethyltransferase-like||Glycine cleavage T-protein/YgfZ, C-terminal	12249.5186759714	687.287576491528	4.1228350832389	2.77938621405489e-08	1.67909324200977e-05
TraesCS2D03G1286700	2D:644546011-644547126|-	--	Quinoprotein amine dehydrogenase, beta chain-like||Protein of unknown function DUF1677, Oryza sativa	62.2395280130155	3.3695289700718	4.12568528449989	3.69240310069149e-05	0.00588087857081809
TraesCS7A03G0196900LC	7A:50522933-50544260|-	--	--	232.69218365789	12.6773928894443	4.15231962269679	3.86418700887137e-07	0.000149827111407925
TraesCSU03G0453800LC	Un:280893007-280894297|-	--	--	768.472652852796	42.0369121156239	4.15568751204096	6.2824165610192e-08	3.3120502802717e-05
TraesCS2B03G1286100LC	2B:716099678-716102152|-	--	--	137.252194924778	7.39514585217584	4.15898301956267	1.8750833661794e-06	0.000536692316268258
TraesCS2B03G0666600LC	2B:352214389-352215153|+	--	--	33.5214326352871	1.6941175983387	4.17793196497555	0.000336207055238845	0.0328566828490472
TraesCS6D03G0031800	6D:6636752-6639774|-	--	O-acyltransferase, WSD1, N-terminal||O-acyltransferase WSD1, C-terminal||Chloramphenicol acetyltransferase-like domain superfamily	218.656945018094	11.6209434819906	4.18688407711087	4.01219177260289e-07	0.000154666514054848
TraesCS2B03G1364500LC	2B:749053215-749056542|-	--	--	199.72560778709	10.5644940745369	4.19230242135433	4.95370791471017e-07	0.000184046117455165
TraesCS3B03G0063000LC	3B:17161026-17162442|-	--	--	84.2411361832503	4.37856668938395	4.1954917892173	9.1922046067769e-06	0.00195699321700224
TraesCS2A03G0380400	2A:147335427-147337228|+	--	Tensin phosphatase, C2 domain||Protein-tyrosine phosphatase-like	44.1852164224049	2.21854375565275	4.20935570000683	4.92269387411129e-05	0.00736499056566421
TraesCS1A03G1040800	1A:586231263-586234207|-	--	Nuclease associated modular domain 3	65.6408853866206	3.3254056957703	4.22063849605721	2.61011551630054e-05	0.00447533222444766
TraesCS5D03G0093800	5D:36309911-36317742|-	--	NB-ARC||Neurotransmitter-gated ion-channel, conserved site||P-loop containing nucleoside triphosphate hydrolase||Leucine-rich repeat domain superfamily||Winged helix-like DNA-binding domain superfamily||Virus X resistance protein-like, coiled-coil domain||Rx, N-terminal||Apoptotic protease-activating factors, helical domain	42.5955087697586	2.11289881490738	4.2232421546636	6.802934527761e-05	0.00957652144921121
TraesCS2B03G0391400	2B:142136607-142139556|-	--	--	186.473671725388	9.50804466708322	4.24347436140804	5.01535121688454e-07	0.000186077203145496
TraesCS2B03G0626700LC	2B:299700131-299700973|-	--	--	43.9390636932649	2.1503223384536	4.24397079855415	4.92269387411129e-05	0.00736499056566421
TraesCS5A03G0762000LC	5A:525027872-525030412|-	--	--	74.9136287179031	3.73183656265854	4.25020363716158	9.84581471968413e-06	0.00205353364708596
TraesCSU03G0048200LC	Un:26903101-26903544|+	--	--	64.2397401131508	3.16934822236107	4.25637632763784	1.05607963953182e-05	0.002173763924703
TraesCS5A03G0549800LC	5A:427504839-427505303|+	--	--	88.4128336647357	4.40143754977913	4.25781017634987	6.40675095076548e-06	0.00144958853573045
TraesCS1B03G0870700LC	1B:549045906-549047259|-	--	--	64.366546585413	3.16934822236107	4.25921576817047	1.05607963953182e-05	0.002173763924703
TraesCS1A03G0906500	1A:551328875-551330896|+	--	Leucine-rich repeat domain superfamily	399.621480902041	20.0725387416201	4.27436935816341	6.33922979282062e-08	3.33541013714562e-05
TraesCS5A03G0092000	5A:34899862-34904771|-	--	Peptidase S8/S53 domain||Peptidase S8 propeptide/proteinase inhibitor I9||Peptidase S8, subtilisin-related||Peptidase S8, subtilisin, Ser-active site||Cucumisin-like catalytic domain||Peptidase S8/S53 domain superfamily||Peptidase S8 propeptide/proteinase inhibitor I9 superfamily||Subtilisin-like protease, fibronectin type-III domain	65.3065936455896	3.17971099390844	4.2755593928683	9.39194889826143e-06	0.0019868329009518
TraesCS1B03G0589100LC	1B:367480318-367481476|+	--	--	65.3131134469632	3.16934822236107	4.2802364873072	9.39194889826143e-06	0.0019868329009518
TraesCS2D03G0574700LC	2D:299344826-299345581|-	--	--	44.488642492859	2.11289881490738	4.28579663005183	4.92269387411129e-05	0.00736499056566421
TraesCS2B03G0506100	2B:199873047-199874871|+	--	Tensin phosphatase, C2 domain||Protein-tyrosine phosphatase-like	46.645879476335	2.21854375565275	4.28732492580227	3.59784514253068e-05	0.00575476589920494
TraesCS2B03G1225800	2B:691090675-691096488|+	--	RNA recognition motif domain||Nucleotide-binding alpha-beta plait domain superfamily||RNA-binding domain superfamily	1838.54758729534	91.7986990792689	4.28952281839433	1.505232018425e-08	1.00133589335425e-05
TraesCS3D03G0899700	3D:523810118-523812016|+	--	Amino acid transporter, transmembrane domain	222.530974493945	10.9980823326305	4.29082407253879	2.01760943191533e-07	8.62538451006095e-05
TraesCS5A03G0492600LC	5A:389569149-389569535|+	--	--	110.748322801372	5.28224703726845	4.32574755228919	2.48486002850835e-06	0.000675699552706308
TraesCS1D03G0954900	1D:475689802-475691440|+	--	Chlorophyll A-B binding protein, plant and chromista||Chlorophyll A-B binding protein||Chlorophyll a/b binding domain superfamily	67.5999323965167	3.16934822236107	4.32979152800389	7.45779295662389e-06	0.00165373304165336
TraesCS7A03G0239200	7A:65067071-65068765|+	--	GDSL lipase/esterase||GDSL lipase/esterase-like, plant||SGNH hydrolase superfamily	198.802693658546	9.5420790362475	4.33069016703438	2.94316091544235e-07	0.000118597825650061
TraesCS4D03G0834600	4D:509435538-509437678|-	--	CCT domain	67.8589289361131	3.16934822236107	4.33529812761806	7.45779295662389e-06	0.00165373304165336
TraesCS2B03G1043500	2B:591433844-591436293|-	--	Cyclin PHO80-like||Cyclin-like superfamily	24.610738400305	1.06937163687878	4.34177537987632	0.000488130947575076	0.0435497697575676
TraesCS3B03G0139600	3B:43426693-43427939|-	--	Plant lipid transfer protein/Par allergen||Bifunctional inhibitor/plant lipid transfer protein/seed storage helical domain||Bifunctional inhibitor/plant lipid transfer protein/seed storage helical domain superfamily	1421.69703836015	68.3603725031448	4.3432493470367	1.2177486877859e-08	8.37233608128263e-06
TraesCS2D03G1196300	2D:622480755-622486954|-	--	Protein kinase domain||S-locus glycoprotein domain||Serine-threonine/tyrosine-protein kinase, catalytic domain||Bulb-type lectin domain||PAN/Apple domain||Serine/threonine-protein kinase, active site||Protein kinase-like domain superfamily||Protein kinase, ATP binding site||S-receptor-like serine/threonine-protein kinase||Bulb-type lectin domain superfamily	28.092412033455	1.23422594252601	4.34497677829252	0.000243816735867594	0.0256947274309031
TraesCS1A03G0226100LC	1A:88844978-88847021|-	--	--	46.3817762159594	2.11289881490738	4.34575112082615	3.59784514253068e-05	0.00575476589920494
TraesCS1B03G0589200	1B:367481495-367482307|+	--	NB-ARC||P-loop containing nucleoside triphosphate hydrolase||Virus X resistance protein-like, coiled-coil domain||Rx, N-terminal	46.3817762159594	2.11289881490738	4.34575112082615	3.59784514253068e-05	0.00575476589920494
TraesCS1D03G0798500	1D:429863146-429871228|-	--	O-methyltransferase domain||Plant methyltransferase dimerisation||O-methyltransferase COMT-type||S-adenosyl-L-methionine-dependent methyltransferase||Winged helix-like DNA-binding domain superfamily||Winged helix DNA-binding domain superfamily	46.3817762159594	2.11289881490738	4.34575112082615	3.59784514253068e-05	0.00575476589920494
TraesCS1D03G0811100	1D:434790128-434793888|+	--	Transferase||Chloramphenicol acetyltransferase-like domain superfamily	34.935128676443	1.55964401673279	4.34820886196252	0.000230560867986034	0.0246919801978269
TraesCS7B03G0981800LC	7B:634202327-634205443|+	--	--	283.112288822542	13.4200039460204	4.35377435958328	1.14016429337233e-07	5.39912980492106e-05
TraesCS4A03G0262600LC	4A:161835304-161835750|+	--	--	33.3580344715773	1.47663807043125	4.35478004485114	0.000336207055238845	0.0328566828490472
TraesCS1A03G1032900	1A:583416965-583419892|+	--	ABI family	24.610738400305	1.05644940745369	4.35749149046063	0.000488130947575076	0.0435497697575676
TraesCS2B03G0417900	2B:151844766-151846325|+	--	GDSL lipase/esterase||GDSL lipase/esterase-like, plant||SGNH hydrolase superfamily	24.610738400305	1.05644940745369	4.35749149046063	0.000488130947575076	0.0435497697575676
TraesCS3B03G0550700LC	3B:310631622-310632953|+	--	--	24.610738400305	1.05644940745369	4.35749149046063	0.000488130947575076	0.0435497697575676
TraesCS7D03G1274300	7D:634506462-634522355|-	--	Terpene synthase, N-terminal domain||Terpene synthase, metal-binding domain||Terpenoid cyclases/protein prenyltransferase alpha-alpha toroid||Isoprenoid synthase domain superfamily||Terpene synthase, N-terminal domain superfamily	24.610738400305	1.05644940745369	4.35749149046063	0.000488130947575076	0.0435497697575676
TraesCS6D03G0556600LC	6D:339991411-339992001|-	--	--	24.6691086636356	1.05644940745369	4.36089172875067	0.000488130947575076	0.0435497697575676
TraesCS2B03G0548800LC	2B:228929179-228929490|-	--	--	26.1698708424372	1.1167053580193	4.37380760416554	0.00038525294388571	0.0365280505507327
TraesCS2D03G1322500	2D:651093420-651098027|-	--	Protein kinase domain||Serine/threonine-protein kinase, active site||Protein kinase-like domain superfamily||Protein kinase, ATP binding site	204.458442094841	9.50804466708322	4.37622425346383	2.37608001544135e-07	9.87294555948808e-05
TraesCS4A03G0012800	4A:4746764-4750893|-	--	Very-long-chain 3-ketoacyl-CoA synthase||FAE1/Type III polyketide synthase-like protein||3-Oxoacyl-[acyl-carrier-protein (ACP)] synthase III, C-terminal||Thiolase-like	377.729095792452	17.4940255967524	4.39017638658498	4.8951608607297e-08	2.66496553307807e-05
TraesCS3B03G0068500	3B:19068532-19072888|+	--	O-acyltransferase, WSD1, N-terminal||O-acyltransferase WSD1, C-terminal||Chloramphenicol acetyltransferase-like domain superfamily	25.5573052618552	1.05644940745369	4.41166677184463	0.000488130947575076	0.0435497697575676
TraesCS5B03G0048500LC	5B:20034841-20056473|-	--	--	25.5573052618552	1.05644940745369	4.41166677184463	0.000488130947575076	0.0435497697575676
TraesCS7A03G0216900	7A:58332079-58334709|-	--	EGF-type aspartate/asparagine hydroxylation site||Protein kinase domain||EGF-like domain||EGF-like calcium-binding domain||Serine/threonine-protein kinase, active site||Growth factor receptor cysteine-rich domain superfamily||Protein kinase-like domain superfamily||Protein kinase, ATP binding site||EGF-like calcium-binding, conserved site||Wall-associated receptor kinase, galacturonan-binding dom…	25.618323077365	1.05644940745369	4.4150902099353	0.00038525294388571	0.0365280505507327
TraesCS2D03G0138200	2D:31699093-31704264|+	--	EGF-type aspartate/asparagine hydroxylation site||Protein kinase domain||EGF-like domain||Serine-threonine/tyrosine-protein kinase, catalytic domain||EGF-like calcium-binding domain||Serine/threonine-protein kinase, active site||Protein kinase-like domain superfamily||Protein kinase, ATP binding site||Wall-associated receptor kinase, galacturonan-binding domain	26.2349126136274	1.08237806254492	4.41787239411149	0.00038525294388571	0.0365280505507327
TraesCS2A03G1265200LC	2A:760186806-760189406|+	--	--	57.9844871492142	2.53099062922174	4.41980155691431	2.19974672672419e-05	0.00391691016847186
TraesCS2B03G0626900LC	2B:299702898-299703526|-	--	--	72.8856483393648	3.16934822236107	4.43820960784427	4.28350463542688e-06	0.00104438114798917
TraesCS1B03G1172000	1B:666005908-666009508|-	--	Peptidase S8/S53 domain||Peptidase S8 propeptide/proteinase inhibitor I9||Peptidase S8, subtilisin-related||Peptidase S8, subtilisin, Ser-active site||Cucumisin-like catalytic domain||Peptidase S8/S53 domain superfamily||Peptidase S8 propeptide/proteinase inhibitor I9 superfamily||Subtilisin-like protease, fibronectin type-III domain	192.847927336403	8.55034963301277	4.44303145350296	2.08609383966754e-07	8.86124829091898e-05
TraesCS2A03G1349000	2A:781549664-781552751|+	--	NAC domain||NAC domain superfamily	73.832215200915	3.16934822236107	4.45679332977611	3.84753445569731e-06	0.00095583748299489
TraesCS4A03G0029700	4A:11651219-11652308|+	--	--	121.649907563212	5.28380718977148	4.46063449833668	1.14527238739857e-06	0.00035942689654405
TraesCS5B03G1200500LC	5B:662667665-662668093|+	--	--	26.5038721234054	1.05644940745369	4.46388110747825	0.00038525294388571	0.0365280505507327
TraesCS6B03G0289400LC	6B:112308092-112308536|-	--	--	26.5038721234054	1.05644940745369	4.46388110747825	0.00038525294388571	0.0365280505507327
TraesCS2D03G0420700LC	2D:155060946-155062285|-	--	--	74.7055958812078	3.16934822236107	4.47373043068983	3.4598395127643e-06	0.000885745478334938
TraesCS5B03G0373300LC	5B:256486168-256495325|+	--	--	51.1146105237104	2.11289881490738	4.48556641717817	1.70996143041565e-05	0.0031807788564855
TraesCS7A03G0167200	7A:41218192-41220020|-	--	--	51.1146105237104	2.11289881490738	4.48556641717817	1.70996143041565e-05	0.0031807788564855
TraesCS2B03G1022100	2B:578037612-578057526|+	--	Glycoside hydrolase family 1||Glycoside hydrolase superfamily	26.9602506737261	1.05644940745369	4.48839618299522	0.000305695076875518	0.0303487974348021
TraesCS3B03G1370800	3B:802135741-802139463|-	--	Protein kinase domain||Serine-threonine/tyrosine-protein kinase, catalytic domain||Leucine-rich repeat||Leucine-rich repeat, typical subtype||Serine/threonine-protein kinase, active site||Protein kinase-like domain superfamily||Protein kinase, ATP binding site||Leucine-rich repeat domain superfamily	28.8607798491706	1.13014177549384	4.4988173658782	0.000195423543519558	0.0217757662778936
TraesCS2B03G0546400LC	2B:226154398-226158671|-	--	--	52.0611773852605	2.11289881490738	4.51197405271905	1.4829535983284e-05	0.00284136406281344
TraesCS1B03G0796800	1B:503890263-503913076|+	--	Solute carrier family 35 member SLC35F1/F2/F6	102.229221047421	4.22579762981476	4.52412996874852	8.3847092334029e-07	0.000281073883150377
TraesCS2D03G0734400LC	2D:411701898-411706191|+	--	--	28.3450610147873	1.08484129616665	4.52602335793115	0.000243816735867594	0.0256947274309031
TraesCS7D03G1294800	7D:640609181-640611414|-	--	Peptidase C1A, papain C-terminal||Cathepsin propeptide inhibitor domain (I29)||Papain-like cysteine peptidase superfamily||Papain-like cysteine endopeptidase||Cysteine peptidase, asparagine active site	77.5473577733041	3.16934822236107	4.52750262104425	2.53231685244936e-06	0.000686504922316453
TraesCS2D03G1149900	2D:609643946-609644769|+	--	Glycine rich protein	711.751261233728	29.5805834087033	4.55031580333198	7.34485857400543e-09	5.55046592974983e-06
TraesCS4B03G0883000	4B:631828841-631840881|+	--	Sugar/inositol transporter||Major facilitator, sugar transporter-like||Sugar transporter, conserved site||Major facilitator superfamily domain||MFS transporter superfamily	282.087319109426	11.6344185567852	4.55251530127464	4.37213573264782e-08	2.42016091627949e-05
TraesCS7A03G1238400	7A:702004117-702008203|+	--	Peptidase S28||Alpha/Beta hydrolase fold||Serine carboxypeptidase S28, SKS domain	28.3970058465058	1.05693910888581	4.56236240740711	0.000243816735867594	0.0256947274309031
TraesCS4A03G0771700	4A:600146120-600147157|+	--	Cytochrome P450||Cytochrome P450 superfamily	28.3970058465058	1.05644940745369	4.56296111744916	0.000243816735867594	0.0256947274309031
TraesCSU03G0065000LC	Un:33718986-33719522|+	--	--	28.3970058465058	1.05644940745369	4.56296111744916	0.000243816735867594	0.0256947274309031
TraesCS7B03G0602400LC	7B:396250289-396251107|-	--	--	388.840090893453	15.8467411118054	4.57361436960683	1.67375445686293e-08	1.0916643983197e-05
TraesCS1D03G0380200	1D:209014959-209018681|+	--	Ribonuclease T2-like||Ribonuclease T2, eukaryotic||Ribonuclease T2-like superfamily	3891.6078616355	159.179114978696	4.57798453848326	1.94568167174568e-09	1.85367872412456e-06
TraesCS1B03G0278500	1B:120035885-120037333|-	--	FBD domain||Leucine-rich repeat domain superfamily	184.14086868825	7.39514585217584	4.58262630009985	1.6322871853541e-07	7.2090882378321e-05
TraesCS5D03G0728800	5D:417599447-417601805|-	--	Cytochrome P450||Cytochrome P450, E-class, group I||Cytochrome P450, conserved site||Cytochrome P450 superfamily	158.762039391072	6.33869644472215	4.58729401575575	2.81762801992632e-07	0.000114056214050917
TraesCS1B03G0441000LC	1B:259126219-259126964|+	--	--	54.9008779699111	2.11289881490738	4.58841495206259	9.78616912528543e-06	0.00204429011422172
TraesCS2D03G0738300LC	2D:414160212-414161798|+	--	--	29.6340537909013	1.08378969288615	4.59116020565447	0.000195423543519558	0.0217757662778936
TraesCS2A03G0583700LC	2A:360569692-360570969|-	--	--	29.2624613625463	1.05644940745369	4.60608470692442	0.000195423543519558	0.0217757662778936
TraesCS1A03G0954000LC	1A:560560865-560562950|-	--	--	29.3435727080559	1.05644940745369	4.61006100149196	0.000195423543519558	0.0217757662778936
TraesCS2B03G1123200LC	2B:642046597-642050826|-	--	--	29.3435727080559	1.05644940745369	4.61006100149196	0.000195423543519558	0.0217757662778936
TraesCS7D03G0270400	7D:76775518-76779149|-	--	Transmembrane protein TauE-like	29.3435727080559	1.05644940745369	4.61006100149196	0.000195423543519558	0.0217757662778936
TraesCS2A03G1255700	2A:758469903-758472184|+	--	Leucine-rich repeat||NB-ARC||P-loop containing nucleoside triphosphate hydrolase||Leucine-rich repeat domain superfamily||Apoptotic protease-activating factors, helical domain	108.855189078272	4.22579762981476	4.61462428836822	4.83120154195247e-07	0.000179995994878665
TraesCS2B03G1409000	2B:763208481-763215510|+	--	NB-ARC||AAA+ ATPase domain||P-loop containing nucleoside triphosphate hydrolase||Leucine-rich repeat domain superfamily||Winged helix-like DNA-binding domain superfamily||Rx, N-terminal	320.886166065515	12.6773928894443	4.61574361350361	2.29531940737363e-08	1.43970083847144e-05
TraesCS7B03G1275100	7B:742141601-742145578|-	--	NB-ARC||P-loop containing nucleoside triphosphate hydrolase||Leucine-rich repeat domain superfamily||Winged helix-like DNA-binding domain superfamily||Rx, N-terminal||Apoptotic protease-activating factors, helical domain	2496.09681390786	99.306244300647	4.61733972685848	1.88216477593529e-09	1.82576827501272e-06
TraesCS2B03G0581600	2B:252639312-252640883|+	--	Myb/SANT-like domain	455.775033609415	17.9596399267127	4.62342962987634	9.19301770096027e-09	6.48764392039196e-06
TraesCS5D03G0738300LC	5D:423124960-423125538|-	--	--	38.5392	1.39742180089222	4.63560198287127	0.000134219518227546	0.0161791227665523
TraesCS2D03G1166000	2D:614177210-614178785|+	--	Protein of unknown function DUF1677, Oryza sativa	164.702633909733	6.33869644472215	4.64025033003711	2.04867389144892e-07	8.74406795652662e-05
TraesCS6D03G0857200LC	6D:478980227-478980685|-	--	--	30.2901395696061	1.05644940745369	4.65567169811649	0.000157376481949378	0.0185374027911271
TraesCS2B03G0013900	2B:3959709-3961547|-	--	NB-ARC||P-loop containing nucleoside triphosphate hydrolase||Winged helix-like DNA-binding domain superfamily||Rx, N-terminal||Apoptotic protease-activating factors, helical domain	36.4722709890412	1.25626658397492	4.69687890764081	4.6924325382676e-05	0.00709610716501284
TraesCS2A03G0982900LC	2A:670642470-670642910|-	--	--	31.2367064311563	1.05644940745369	4.69988449751053	0.000127311843100785	0.0155573555957698
TraesCS7B03G0726300	7B:489795599-489798247|+	--	At3g27210-like	31.2367064311563	1.05644940745369	4.69988449751053	0.000127311843100785	0.0155573555957698
TraesCS7B03G0602200	7B:396246779-396247240|-	--	--	341.710637019619	12.6773928894443	4.70642262810147	1.33166575310911e-08	9.06212133416804e-06
TraesCS1D03G0957400	1D:476636926-476637192|+	--	SANT/Myb domain||Homeobox-like domain superfamily	88.1119077774413	3.16934822236107	4.7114810517878	9.54583210686781e-07	0.00031027929729951
TraesCS2B03G1048500	2B:595087250-595097508|+	--	P-loop containing nucleoside triphosphate hydrolase||DNA2/NAM7 helicase, helicase domain||DNA2/NAM7 helicase-like, C-terminal	60.5185383239174	2.11289881490738	4.72865584806971	5.07387754400262e-06	0.00119885524680083
TraesCS6D03G0616600LC	6D:382208538-382211350|-	--	--	60.8828914917521	2.11289881490738	4.73729762402788	5.07387754400262e-06	0.00119885524680083
TraesCS2B03G1235200	2B:696272194-696276226|-	--	Ribonuclease H-like superfamily||Exonuclease, RNase T/DNA polymerase III||Ribonuclease H superfamily	96.6202780352639	3.38910495747501	4.75107832733207	1.26737332162554e-06	0.000392209405193538
TraesCS5B03G0721900	5B:466959600-466960825|-	--	SANT/Myb domain||Homeobox-like domain superfamily||SANT domain	90.7866216649743	3.16934822236107	4.75456300142228	7.24953362924873e-07	0.000247299947690331
TraesCS2B03G1428800	2B:770272575-770277027|-	--	F-box domain||Leucine-rich repeat domain superfamily||F-box-like domain superfamily	181.740837417637	6.33869644472215	4.7821658225446	8.74099254588806e-08	4.38190290033069e-05
TraesCS7B03G1300300LC	7B:752844394-752844729|-	--	--	26.586653247791	0.824664127036395	4.78392723468524	0.00038525294388571	0.0365280505507327
TraesCS5A03G0758500LC	5A:524158821-524159297|-	--	--	33.1298401542567	1.05644940745369	4.7844417796452	8.43945324357924e-05	0.0112509172776472
TraesCS7A03G0202000	7A:51841425-51842990|-	--	O-methyltransferase domain||Plant methyltransferase dimerisation||O-methyltransferase COMT-type||S-adenosyl-L-methionine-dependent methyltransferase||Winged helix-like DNA-binding domain superfamily||Winged helix DNA-binding domain superfamily	33.1298401542567	1.05644940745369	4.7844417796452	8.43945324357924e-05	0.0112509172776472
TraesCS7A03G1282900	7A:714196247-714197823|+	--	Protein of unknown function DUF247, plant	33.1298401542567	1.05644940745369	4.7844417796452	8.43945324357924e-05	0.0112509172776472
TraesCS2B03G1568400	2B:811019061-811025804|+	--	Chaperonin Cpn60/TCP-1 family||Phosphatidylinositol-4-phosphate 5-kinase, core||GroEL-like apical domain superfamily||TCP-1-like chaperonin intermediate domain superfamily||Phosphatidylinositol-4-phosphate 5-kinase, N-terminal	93.0777065167261	3.16934822236107	4.7904696726544	6.0592385548884e-07	0.000214371681286741
TraesCS2D03G0590300	2D:311633624-311639030|-	--	Amino acid transporter, transmembrane domain	93.9896363388108	3.16934822236107	4.80451675390201	5.5460850830298e-07	0.00020211388753402
TraesCS5A03G0802100	5A:541303391-541304858|+	--	Major intrinsic protein||Major intrinsic protein, conserved site||Aquaporin-like||Aquaporin transporter	931.879	32.241565519076	4.81524877380637	1.31730987095999e-09	1.38895486631339e-06
TraesCS5A03G0367700	5A:296128579-296131689|+	--	Six-bladed beta-propeller, TolB-like||Strictosidine synthase, conserved region	34.0764070158069	1.05644940745369	4.82493174824903	6.91331674174254e-05	0.00970629670540653
TraesCS7D03G1299100	7D:641332245-641336627|-	--	NB-ARC||AAA+ ATPase domain||P-loop containing nucleoside triphosphate hydrolase||Leucine-rich repeat domain superfamily||Winged helix-like DNA-binding domain superfamily||Rx, N-terminal	65.4438736030806	2.12341787199307	4.83454055099007	2.73850929963032e-06	0.000734195719366216
TraesCS2B03G1134500	2B:646792899-646796568|-	--	Terpene synthase, N-terminal domain||Terpene synthase, metal-binding domain||Terpenoid cyclases/protein prenyltransferase alpha-alpha toroid||Isoprenoid synthase domain superfamily||Terpene synthase, N-terminal domain superfamily	65.3131134469632	2.11289881490738	4.8384310802016	2.73850929963032e-06	0.000734195719366216
TraesCS4B03G0379400LC	4B:243840739-243843774|+	--	--	65.3131134469632	2.11289881490738	4.8384310802016	2.73850929963032e-06	0.000734195719366216
TraesCS3A03G1008600	3A:676039833-676044746|+	--	Armadillo-like helical	35.0229738773571	1.05644940745369	4.86431629887349	5.68506249828575e-05	0.00830984806598743
TraesCS1D03G0956800	1D:476518598-476519725|+	--	SANT/Myb domain||Homeobox-like domain superfamily	227.513173694171	7.39514585217584	4.88757823752564	2.576056420615e-08	1.5761211256038e-05
TraesCS3D03G0006400	3D:1456044-1459329|+	--	Glycoside hydrolase family 1||Glycoside hydrolase superfamily	35.9695407389073	1.05644940745369	4.90265418903554	4.6924325382676e-05	0.00709610716501284
TraesCS3D03G1135900	3D:601163667-601171584|-	--	UDP-glucuronosyl/UDP-glucosyltransferase	36.9161076004575	1.05644940745369	4.9399996124764	3.88700910579674e-05	0.00612462226262455
TraesCS4D03G0299300LC	4D:135313198-135314131|+	--	--	37.2845505421366	1.05644940745369	4.95427856805377	3.88700910579674e-05	0.00612462226262455
TraesCS1D03G0154200LC	1D:53223032-53224342|-	--	--	35.5790819352735	0.994089249825723	4.96530990657131	5.68506249828575e-05	0.00830984806598743
TraesCS5B03G1020200	5B:592195338-592197616|+	--	NAD-dependent epimerase/dehydratase||NAD(P)-binding domain superfamily	40.7023750466582	1.15305654693063	4.96685649173747	2.25449581999321e-05	0.00398020718028715
TraesCS2B03G0700200LC	2B:376476885-376477427|-	--	--	37.8626744620077	1.05644940745369	4.97640265989094	3.23096056900313e-05	0.00533348416700046
TraesCS3B03G0473700LC	3B:230978724-230979479|-	--	--	37.8626744620077	1.05644940745369	4.97640265989094	3.23096056900313e-05	0.00533348416700046
TraesCS3D03G0152600	3D:38059304-38061629|-	--	Cytochrome P450||Cytochrome P450, E-class, group I||Cytochrome P450, conserved site||Cytochrome P450 superfamily	38.9432326578409	1.07913085671648	4.98939316093253	2.69459260827937e-05	0.004593032103416
TraesCS3D03G0714300	3D:429192295-429194911|+	--	Leucine-rich repeat domain superfamily	212.299127461308	6.4039652566106	4.99173893679971	2.27333336414897e-08	1.43026983070844e-05
TraesCS2B03G1094800	2B:624847837-624848441|-	--	--	107.908622216722	3.16934822236107	5.00350386603929	1.7325946797619e-07	7.53975459662779e-05
TraesCS3A03G0005300	3A:1686660-1687091|+	--	Zinc finger C2H2-type||Zinc finger C2H2 superfamily	38.7213009440462	1.05644940745369	5.00864753241751	3.23096056900313e-05	0.00533348416700046
TraesCS7B03G1097300	7B:683614673-683618065|-	--	Terpene synthase, N-terminal domain||Terpene synthase, metal-binding domain||Terpenoid cyclases/protein prenyltransferase alpha-alpha toroid||Isoprenoid synthase domain superfamily||Terpene cyclase-like 1, C-terminal domain||Terpene synthase, N-terminal domain superfamily	144.824729817179	4.22579762981476	5.02610727806416	4.4810892615415e-08	2.4748972492936e-05
TraesCS7B03G0602300LC	7B:396248948-396250285|-	--	--	396.304954160827	11.6209434819906	5.04445299069196	2.06391618521879e-09	1.95237688499632e-06
TraesCS2D03G0407900	2D:144413861-144417648|+	--	GDSL lipase/esterase||GDSL lipase/esterase-like, plant||SGNH hydrolase superfamily	39.7558081851081	1.05644940745369	5.04656384975765	2.25449581999321e-05	0.00398020718028715
TraesCS4D03G0824900	4D:505548608-505552061|-	--	Nucleoside phosphatase GDA1/CD39	844.697118214765	24.2983363714349	5.07982796772663	3.66298917896806e-10	4.56607006253046e-07
TraesCS5B03G0721700	5B:466933854-466934643|-	--	SANT/Myb domain||Homeobox-like domain superfamily	40.7023750466582	1.05644940745369	5.08040505867853	2.25449581999321e-05	0.00398020718028715
TraesCS2A03G0146100	2A:37839541-37840841|-	--	Germin||Cupin 1||RmlC-like cupin domain superfamily||RmlC-like jelly roll fold||Germin, manganese binding site	260.723463910202	7.39514585217584	5.08404674259562	7.62463160292587e-09	5.70522402057213e-06
TraesCS5B03G1135600	5B:638570500-638571300|-	--	Chlorophyll A-B binding protein, plant and chromista||Chlorophyll A-B binding protein||Chlorophyll a/b binding domain superfamily	154.704578533239	4.22579762981476	5.12123501699911	2.49038758011927e-08	1.54856827709234e-05
TraesCS2B03G0700100LC	2B:376476318-376476824|-	--	--	42.5955087697586	1.05644940745369	5.14579528314628	1.5927855128145e-05	0.00300489012304383
TraesCS1A03G0998000LC	1A:573942447-573947124|+	--	--	43.8959184795542	1.0842187191526	5.15549017826387	1.13841205220871e-05	0.00229541042363715
TraesCS1B03G1170500	1B:664805172-664805972|+	--	Chlorophyll A-B binding protein, plant and chromista||Chlorophyll A-B binding protein||Chlorophyll a/b binding domain superfamily	44.0949572664059	1.05644940745369	5.19556277646018	1.13841205220871e-05	0.00229541042363715
TraesCS2D03G0651800LC	2D:355771551-355773131|-	--	--	84.5905337679798	2.13061462316509	5.19953644316813	3.52720469880052e-07	0.000137964387896192
TraesCS2B03G0391700LC	2B:142224558-142225542|+	--	--	44.488642492859	1.05644940745369	5.2083497585345	1.13841205220871e-05	0.00229541042363715
TraesCS2D03G1214100	2D:626479878-626483089|-	--	Protein of unknown function DUF3615	606.696248375341	15.8467411118054	5.2152437699776	2.89920014698204e-10	3.73309992830088e-07
TraesCS2B03G1160900LC	2B:660449847-660451852|-	--	--	66.0161624957477	1.58453894452375	5.24271944613429	2.4314274720012e-06	0.000666605953166535
TraesCS4D03G0781200	4D:494026681-494034051|+	--	Sugar/inositol transporter||Major facilitator, sugar transporter-like||Major facilitator superfamily domain||MFS transporter superfamily	45.6322798699891	1.05768177579359	5.24335896094623	9.66399242122225e-06	0.00202193460257666
TraesCS4B03G0409400LC	4B:286429072-286429581|-	--	--	46.0090765591112	1.06368368100006	5.24787691574411	8.22533982777172e-06	0.00178132259877654
TraesCS3D03G0000600	3D:285779-290894|+	--	Cellulose synthase||Nucleotide-diphospho-sugar transferases	47.6163063165635	1.0756935642912	5.28275747467633	7.0186828017919e-06	0.00156547142492141
TraesCS2B03G1522800	2B:798801199-798802679|-	--	Quinoprotein amine dehydrogenase, beta chain-like||Protein of unknown function DUF1677, Oryza sativa	832.419882968112	20.3288159567794	5.31461790618622	1.11457272437487e-10	1.70582580855856e-07
TraesCS1A03G0996200	1A:573188159-573188699|-	--	Serralysin-like metalloprotease, C-terminal	54.9730502171703	1.17031820586187	5.37993038050788	2.14312140825752e-06	0.000598637766352646
TraesCS7D03G0112500	7D:27213198-27216263|-	--	Oxoglutarate/iron-dependent dioxygenase||Non-haem dioxygenase N-terminal domain||Isopenicillin N synthase-like superfamily	50.1680436621602	1.05644940745369	5.38121950764832	4.42440630962989e-06	0.00106907122025079
TraesCS2B03G1473400	2B:784236899-784239585|+	--	--	140.999495298207	3.16934822236107	5.38898833016068	1.73037951083007e-08	1.11496627610877e-05
TraesCS3A03G0705800	3A:520878381-520880609|-	--	BURP domain	964.369985752601	22.1854375565275	5.4015047100694	5.56992108237933e-11	9.71132122833666e-08
TraesCS2B03G0726000	2B:394763672-394764664|+	--	--	61.3487376398786	1.22405305712201	5.47918130743086	9.57264438737055e-07	0.00031027929729951
TraesCS3D03G0524000LC	3D:301202837-301203391|+	--	--	152.775669546612	3.20436692772949	5.4893511993803	8.91054769913645e-09	6.35555535888139e-06
TraesCS1D03G0739100LC	1D:409295248-409296045|+	--	--	55.8474448314613	1.05644940745369	5.53557407920178	2.14312140825752e-06	0.000598637766352646
TraesCSU03G0025900	Un:20281705-20283441|-	--	Transferase||Chloramphenicol acetyltransferase-like domain superfamily	71.182	1.33897168835227	5.57517010891884	1.36889946621528e-06	0.000415435291931271
TraesCS6D03G0147100LC	6D:45861511-45863458|-	--	--	164.072256005774	3.21234300998525	5.58873192037924	4.52701305716896e-09	3.67059575419572e-06
TraesCS2D03G1342500LC	2D:656227992-656233735|+	--	--	111.694889662923	2.11289881490738	5.61139439079793	3.39933252259816e-08	1.9627834279833e-05
TraesCS2D03G1312300	2D:648947509-648952729|-	--	Protein kinase domain||Serine/threonine-protein kinase, active site||Protein kinase-like domain superfamily||Tensin phosphatase, C2 domain||Protein kinase, ATP binding site||Protein-tyrosine phosphatase-like	62.2049235384946	1.11403529672341	5.62202466608116	8.42045359421347e-07	0.000281624502309854
TraesCS5B03G0700200LC	5B:457501165-457503697|+	--	--	59.6337122776621	1.05644940745369	5.63000450766973	1.24339143428157e-06	0.000385682673266224
TraesCS2B03G1170300LC	2B:663505316-663506987|+	--	--	60.5802791392123	1.05644940745369	5.65267700070519	1.09005840987465e-06	0.000344123054932736
TraesCS3B03G0139900	3B:43482768-43483220|-	--	Plant lipid transfer protein/Par allergen||Bifunctional inhibitor/plant lipid transfer protein/seed storage helical domain||Bifunctional inhibitor/plant lipid transfer protein/seed storage helical domain superfamily	574.581629830076	11.0209314388387	5.65586790452151	3.73422254507963e-11	7.20779008830489e-08
TraesCS6A03G0795400LC	6A:538695754-538696266|-	--	--	24.0539974873839	0.345217266613547	5.65690898316598	9.63608450846118e-05	0.0125391312364737
TraesCS1B03G0586900	1B:365348275-365349295|-	--	Pectinesterase inhibitor domain||Invertase/pectin methylesterase inhibitor domain superfamily	609.058484984995	11.6209434819906	5.66426239211455	3.78276582832015e-11	7.20779008830489e-08
TraesCS3D03G0647800	3D:389657092-389659654|-	--	BURP domain	1654.59887398974	31.6934822236107	5.66807028185657	4.635027890597e-12	1.22419805950065e-08
TraesCS3B03G0533000	3B:278525745-278538777|-	--	Major facilitator superfamily||Major facilitator superfamily domain||MFS transporter superfamily	66.0376896649475	1.05644940745369	5.77687066063661	5.12166049319148e-07	0.000189097952695284
TraesCS3D03G0605500LC	3D:363106305-363122054|+	--	--	69.099380893164	1.05644940745369	5.84213191950438	3.58274918035551e-07	0.000139931796683988
TraesCS2B03G1238700	2B:697911447-697914725|-	--	Protein of unknown function DUF594||Domain of unknown function DUF4220	205.459969813275	3.33335202302921	5.86162458376444	2.02273410930873e-09	1.92022971885835e-06
TraesCS3D03G0949400	3D:546054192-546055943|+	--	GDSL lipase/esterase||GDSL lipase/esterase-like, plant||SGNH hydrolase superfamily	71.9661963783304	1.05644940745369	5.90067381753973	2.84278909134897e-07	0.000114726538276589
TraesCS1D03G0957500	1D:476641689-476641931|+	--	SANT/Myb domain||Homeobox-like domain superfamily	137.698670518976	2.11289881490738	5.91303846633836	5.80882721274874e-09	4.55753749197898e-06
TraesCS1D03G0480300LC	1D:262126609-262127082|-	--	--	101.29539325375	1.52152818640607	5.91367244182458	8.26414528218194e-08	4.18319429881376e-05
TraesCS5D03G0110800	5D:43487244-43492264|-	--	Peptidase S8/S53 domain||Peptidase S8 propeptide/proteinase inhibitor I9||Peptidase S8, subtilisin-related||Peptidase S8, subtilisin, Ser-active site||Cucumisin-like catalytic domain||Peptidase S8/S53 domain superfamily||Peptidase S8 propeptide/proteinase inhibitor I9 superfamily||Subtilisin-like protease, fibronectin type-III domain	271.185192152526	4.27557103359033	5.9140754670378	4.50224584645998e-10	5.33786267556295e-07
TraesCS5B03G0700100	5B:457498948-457500522|+	--	NAD-dependent epimerase/dehydratase||NAD(P)-binding domain superfamily	333.390386892699	5.28224703726845	5.91457866358042	1.66042383393804e-10	2.31902964367179e-07
TraesCS2B03G1227100	2B:691229149-691231804|-	--	tRNA (guanine-N-7) methyltransferase, Trmb type||S-adenosyl-L-methionine-dependent methyltransferase	140.739517302216	2.15585781479365	5.9170707262733	4.79162438065011e-09	3.85004132464525e-06
TraesCS7B03G0306900	7B:140709471-140711844|+	--	B-box-type zinc finger||CCT domain	80.7558987136962	1.05644940745369	6.06664726784612	1.06731771875554e-07	5.13988346787385e-05
TraesCS7B03G0628800LC	7B:420048518-420049300|-	--	--	91.0422897458605	1.05644940745369	6.23936222640567	3.97895445129063e-08	2.24878366403875e-05
TraesCS2D03G1140000	2D:606069737-606074745|-	--	AP2/ERF domain||NB-ARC||DNA-binding domain superfamily||P-loop containing nucleoside triphosphate hydrolase||Leucine-rich repeat domain superfamily||Winged helix-like DNA-binding domain superfamily||AP2/ERF domain superfamily||Rx, N-terminal	272.611256126455	3.16934822236107	6.33952076637616	4.5508054284959e-11	8.20251929801059e-08
TraesCS2D03G0134600	2D:30840411-30853998|-	--	Protein kinase domain||von Willebrand factor, type A||Serine/threonine-protein kinase, active site||Protein kinase-like domain superfamily||Protein kinase, ATP binding site||von Willebrand factor A-like domain superfamily	467.604029605795	5.28224703726845	6.40249689461162	6.93117749434877e-12	1.71200084110415e-08
TraesCS2B03G1484900LC	2B:786907518-786911853|-	--	--	110.748322801372	1.05644940745369	6.52168309949661	7.10863377155999e-09	5.43352190516144e-06
TraesCS2A03G0516900LC	2A:277382907-277383287|-	--	--	28.9432049418687	0.110268055010533	6.9267645108644	2.8247060862709e-05	0.00475706184074259
TraesCS1A03G0507500LC	1A:343950827-343951273|-	--	--	17.6501696901257	0	7.13874977555132	0.000530404868558373	0.0459580948785818
TraesCS1A03G0991800	1A:571864185-571864427|+	--	SANT/Myb domain||Homeobox-like domain superfamily	17.7041147810112	0	7.14312123692525	0.000530404868558373	0.0459580948785818
TraesCS3B03G0887700	3B:573607672-573608281|-	--	--	17.7596564201349	0	7.14760827817584	0.000530404868558373	0.0459580948785818
TraesCS5D03G0419900	5D:273019197-273022135|+	--	Protein kinase domain||Legume lectin domain||Serine/threonine-protein kinase, active site||Protein kinase-like domain superfamily||Concanavalin A-like lectin/glucanase domain superfamily||Protein kinase, ATP binding site	17.8384749460982	0	7.15395192975824	0.000530404868558373	0.0459580948785818
TraesCS4B03G0958300	4B:657418538-657420627|+	--	CCT domain	17.8931169360128	0	7.15833343571003	0.000530404868558373	0.0459580948785818
TraesCS3A03G0442700	3A:228810209-228811839|+	--	--	17.8966512686627	0	7.15861638096699	0.000530404868558373	0.0459580948785818
TraesCS6A03G0465400LC	6A:222150359-222151252|-	--	--	17.9004221361998	0	7.15891820113481	0.000530404868558373	0.0459580948785818
TraesCS1B03G1150300LC	1B:656687293-656688243|-	--	--	17.9847703694536	0	7.16565298189098	0.000530404868558373	0.0459580948785818
TraesCS2B03G1040300LC	2B:589338348-589346781|-	--	--	17.9847703694536	0	7.16565298189098	0.000530404868558373	0.0459580948785818
TraesCS2D03G0840000LC	2D:473326744-473326995|+	--	--	17.9847703694536	0	7.16565298189098	0.000530404868558373	0.0459580948785818
TraesCS4A03G0046500LC	4A:17384584-17385324|-	--	--	17.9847703694536	0	7.16565298189098	0.000530404868558373	0.0459580948785818
TraesCS7D03G0092100LC	7D:21375598-21376497|+	--	--	17.9847703694536	0	7.16565298189098	0.000530404868558373	0.0459580948785818
TraesCS3B03G0570300	3B:339991691-339996751|+	--	--	18.1386363992576	0	7.17785800467671	0.000530404868558373	0.0459580948785818
TraesCS6A03G0265200LC	6A:84816436-84817959|-	--	--	18.1460830610873	0	7.17844608035417	0.000530404868558373	0.0459580948785818
TraesCSU03G0517400LC	Un:313879922-313880536|+	--	--	18.2501450739741	0	7.18663905380763	0.000530404868558373	0.0459580948785818
TraesCSU03G0263000	Un:205748147-205750423|+	--	NB-ARC||P-loop containing nucleoside triphosphate hydrolase||Leucine-rich repeat domain superfamily||Winged helix-like DNA-binding domain superfamily||Virus X resistance protein-like, coiled-coil domain||Rx, N-terminal||Apoptotic protease-activating factors, helical domain	18.3100102928767	0	7.19133134404346	0.000530404868558373	0.0459580948785818
TraesCS2D03G0293100LC	2D:84301090-84301539|+	--	--	18.3562640684373	0	7.19494633477617	0.000530404868558373	0.0459580948785818
TraesCS6B03G0695200LC	6B:424240167-424241620|+	--	--	18.8654008673902	0	7.23415086535018	0.00039082463999038	0.0365280505507327
TraesCS4A03G0992300	4A:676047192-676048974|+	--	GDSL lipase/esterase||GDSL lipase/esterase-like, plant||SGNH hydrolase superfamily	344.313403662484	2.11289881490738	7.23445361019814	1.23831949718617e-12	4.58797373707475e-09
TraesCS2A03G0622900	2A:399870309-399870704|-	--	--	18.9313372310038	0	7.23915105451328	0.00039082463999038	0.0365280505507327
TraesCS2B03G1577800LC	2B:812642180-812642623|-	--	--	18.9313372310038	0	7.23915105451328	0.00039082463999038	0.0365280505507327
TraesCS5A03G0380800LC	5A:304298915-304299229|+	--	--	18.9313372310038	0	7.23915105451328	0.00039082463999038	0.0365280505507327
TraesCS7A03G0267800LC	7A:73022164-73023192|-	--	--	18.9313372310038	0	7.23915105451328	0.00039082463999038	0.0365280505507327
TraesCS7B03G1103000LC	7B:685808170-685809387|-	--	--	18.9313372310038	0	7.23915105451328	0.00039082463999038	0.0365280505507327
TraesCS7B03G0412800LC	7B:215229081-215230154|-	--	--	19.1522127024208	0	7.25577568064425	0.00039082463999038	0.0365280505507327
TraesCS1B03G1150100LC	1B:656642487-656642996|+	--	--	19.2510449927137	0	7.26315289749907	0.00039082463999038	0.0365280505507327
TraesCS4A03G0880100LC	4A:629417968-629418501|+	--	--	19.2781349575003	0	7.26516842542381	0.00039082463999038	0.0365280505507327
TraesCS2A03G0297200LC	2A:95151491-95152987|-	--	--	19.2992536086755	0	7.26673772912458	0.00039082463999038	0.0365280505507327
TraesCS2B03G0079700	2B:19895885-19899631|-	--	Protein kinase domain||Leucine-rich repeat||Leucine-rich repeat, typical subtype||Tyrosine-protein kinase, active site||Protein kinase-like domain superfamily||Leucine-rich repeat-containing N-terminal, plant-type||Protein kinase, ATP binding site||Leucine-rich repeat domain superfamily	19.4526344956976	0	7.2780843600139	0.00039082463999038	0.0365280505507327
TraesCS1B03G0133700LC	1B:44034660-44035655|+	--	--	19.4850961489487	0	7.28047437055164	0.00039082463999038	0.0365280505507327
TraesCS7B03G1300700LC	7B:753087790-753088488|+	--	--	19.5969307405571	0	7.28867808033601	0.000290613193839001	0.0293540233201409
TraesCS1A03G0080500	1A:19948133-19951331|-	--	Cytochrome P450||Cytochrome P450, E-class, group IV||Cytochrome P450, conserved site||Cytochrome P450 superfamily	19.877904092554	0	7.30908558069737	0.000290613193839001	0.0293540233201409
TraesCS2B03G1331300	2B:735605291-735607954|-	--	UDP-glucuronosyl/UDP-glucosyltransferase||UDP-glycosyltransferase family, conserved site	19.877904092554	0	7.30908558069737	0.000290613193839001	0.0293540233201409
TraesCS2D03G1311000LC	2D:648661246-648661911|-	--	--	19.877904092554	0	7.30908558069737	0.000290613193839001	0.0293540233201409
TraesCS3B03G1012100LC	3B:657479936-657481972|-	--	--	19.877904092554	0	7.30908558069737	0.000290613193839001	0.0293540233201409
TraesCS4B03G0059600LC	4B:23291292-23291807|-	--	--	19.877904092554	0	7.30908558069737	0.000290613193839001	0.0293540233201409
TraesCS7D03G0093200LC	7D:21484540-21484866|+	--	--	19.877904092554	0	7.30908558069737	0.000290613193839001	0.0293540233201409
TraesCSU03G0295900	Un:220563635-220565259|-	--	F-box domain||Phloem protein 2-like||F-box-like domain superfamily	19.9857732994348	0	7.31684422489426	0.000290613193839001	0.0293540233201409
TraesCS2B03G1402600LC	2B:761961258-761962979|+	--	--	20.1864807905976	0.000780739976160309	7.32206578020089	0.000290613193839001	0.0293540233201409
TraesCS2D03G1243600	2D:633874732-633876910|+	--	Casparian strip membrane protein domain	20.2597447845412	0	7.33636446001807	0.000290613193839001	0.0293540233201409
TraesCS2D03G0451100LC	2D:178440653-178441795|-	--	--	20.3316254079942	0	7.34144245423627	0.000290613193839001	0.0293540233201409
TraesCS2D03G1120500LC	2D:600797204-600803244|+	--	--	196.88590720244	1.05644940745369	7.35103981927736	4.14905306237478e-11	7.68612079804928e-08
TraesCS4A03G1179600LC	4A:739454758-739455090|+	--	--	20.5629027473591	0	7.35766077820308	0.000290613193839001	0.0293540233201409
TraesCS4A03G0748100LC	4A:594967127-594968155|-	--	--	20.6491939686791	0	7.36366555084837	0.000217959895379251	0.0235874165076547
TraesCS1B03G1226300LC	1B:680955354-680955902|-	--	--	20.7099440484576	0	7.36787804308058	0.000217959895379251	0.0235874165076547
TraesCS5A03G0848800	5A:556971749-556981486|-	--	Helicase-like, DEXD box c2 type||ATP-dependent helicase, C-terminal||DEAD2||Helicase superfamily 1/2, ATP-binding domain, DinG/Rad3-type||P-loop containing nucleoside triphosphate hydrolase	20.7314536682031	0	7.36936660544376	0.000217959895379251	0.0235874165076547
TraesCS5B03G0369200	5B:252834006-252836761|-	--	Six-bladed beta-propeller, TolB-like||Strictosidine synthase, conserved region	20.8244709541042	0	7.37578619600626	0.000217959895379251	0.0235874165076547
TraesCS6B03G0548100LC	6B:272137238-272137537|+	--	--	20.8244709541042	0	7.37578619600626	0.000217959895379251	0.0235874165076547
TraesCS2B03G0683900LC	2B:370854752-370855202|-	--	--	20.949138271745	0	7.3843455590248	0.000217959895379251	0.0235874165076547
TraesCSU03G0525300LC	Un:320400595-320400987|+	--	--	21.0981422534669	0	7.39450964391752	0.000217959895379251	0.0235874165076547
TraesCS1B03G0648300LC	1B:408770832-408772481|-	--	--	21.2642068245441	0.000107243249193135	7.40449973756228	0.000217959895379251	0.0235874165076547
TraesCS5A03G0661500	5A:479518595-479520374|+	--	NAD-dependent epimerase/dehydratase||NAD(P)-binding domain superfamily	21.7710378156544	0	7.43953881282873	0.00016479894528675	0.0190310678115556
TraesCS2B03G0898100	2B:501668108-501669115|-	--	Plant peroxidase||Haem peroxidase||Haem peroxidase superfamily||Peroxidases heam-ligand binding site||Peroxidase, active site||Secretory peroxidase	21.9465990787352	0	7.45105953838419	0.00016479894528675	0.0190310678115556
TraesCS4B03G0806000	4B:598516854-598525009|-	--	Alanine-tRNA ligase, class IIc||DHHA1 domain||Translation protein, beta-barrel domain superfamily||Threonyl/alanyl tRNA synthetase, SAD||Alanine-tRNA ligase, class IIc, anti-codon-binding domain superfamily||Threonyl/alanyl tRNA synthetase, class II-like, putative editing domain superfamily||Alanyl-tRNA synthetase, class IIc, N-terminal||Alanyl-tRNA synthetase, class IIc, core domain||Alanine-tRN…	22.0789470520644	0	7.45968409484715	0.00016479894528675	0.0190310678115556
TraesCS4A03G1195900LC	4A:742640950-742641935|+	--	--	22.1694	0	7.46554631806982	0.00016479894528675	0.0190310678115556
TraesCS2A03G1320300LC	2A:774572485-774572996|-	--	--	22.2357369675851	0	7.46983515356133	0.00016479894528675	0.0190310678115556
TraesCS2D03G1179900	2D:619536757-619538128|+	--	Alpha/beta hydrolase fold-1||Epoxide hydrolase-like||Alpha/Beta hydrolase fold	22.2535844543636	0	7.47098613955747	0.00016479894528675	0.0190310678115556
TraesCS2B03G1006300	2B:568456843-568458173|+	--	--	22.3180522975398	0	7.47513604412644	0.00016479894528675	0.0190310678115556
TraesCS4D03G0369500LC	4D:226378293-226379012|+	--	--	22.3389807450435	0	7.4764806812742	0.00016479894528675	0.0190310678115556
TraesCS5B03G0858300	5B:529068868-529069422|+	--	Domain of unknown function DUF632	22.6081638602389	0	7.49366469124742	0.000125561101170857	0.0154211230885533
TraesCS2B03G1552600	2B:807173060-807174865|-	--	Proton-dependent oligopeptide transporter family||MFS transporter superfamily	217.486746790154	1.05644940745369	7.49451995838351	1.67994623224891e-11	3.58513965531775e-08
TraesCS2D03G1209300	2D:624948650-624952455|-	--	NB-ARC||P-loop containing nucleoside triphosphate hydrolase||Leucine-rich repeat domain superfamily||Winged helix-like DNA-binding domain superfamily||Virus X resistance protein-like, coiled-coil domain||Rx, N-terminal||Apoptotic protease-activating factors, helical domain	22.7176046772046	0	7.50059302671558	0.000125561101170857	0.0154211230885533
TraesCS4B03G0276500LC	4B:144073392-144073598|+	--	--	22.7176046772046	0	7.50059302671558	0.000125561101170857	0.0154211230885533
TraesCS6D03G0305700LC	6D:126486873-126490760|+	--	--	22.7726163687037	0	7.50406310901682	0.000125561101170857	0.0154211230885533
TraesCS2A03G1343400	2A:780229057-780231303|+	--	--	22.8077401282424	0	7.50627432270221	0.000125561101170857	0.0154211230885533
TraesCSU03G0209600	Un:175136642-175141558|-	--	Leucine-rich repeat domain superfamily	22.9149547266353	0	7.51300312369494	0.000125561101170857	0.0154211230885533
TraesCS7A03G0833700LC	7A:500995185-500996123|-	--	--	23.0937523860708	0	7.52415514449471	0.000125561101170857	0.0154211230885533
TraesCS1B03G0802500LC	1B:506190782-506191156|+	--	--	23.1492166404516	0	7.52759713193774	0.000125561101170857	0.0154211230885533
TraesCS7B03G0250900LC	7B:111313308-111313550|-	--	--	23.1719567707487	0	7.5290059633167	0.000125561101170857	0.0154211230885533
TraesCS7A03G0062500	7A:12598907-12600340|+	--	Pectinesterase inhibitor domain||Invertase/pectin methylesterase inhibitor domain superfamily	23.406293368109	0	7.54344436584424	0.000125561101170857	0.0154211230885533
TraesCS1D03G1002600LC	1D:486910112-486913197|-	--	--	23.6116664186081	0	7.5559804776513	9.63608450846118e-05	0.0125391312364737
TraesCS2A03G0844600LC	2A:586725478-586726809|+	--	--	23.6641715387548	0	7.5591680180085	9.63608450846118e-05	0.0125391312364737
TraesCS6D03G0484100	6D:292424972-292428968|+	--	Telomere length regulation protein, conserved domain||TEL2, C-terminal domain superfamily	23.7824868978871	0	7.56632512944909	9.63608450846118e-05	0.0125391312364737
TraesCS3B03G1321000LC	3B:787162821-787163798|-	--	--	24.5533065784055	0	7.6121038900309	9.63608450846118e-05	0.0125391312364737
TraesCS7D03G0405400	7D:135303686-135304324|-	--	Germin||Cupin 1||RmlC-like cupin domain superfamily||RmlC-like jelly roll fold||Germin, manganese binding site	24.5809319764145	0	7.6137178942108	9.63608450846118e-05	0.0125391312364737
TraesCS3B03G0776400LC	3B:496807009-496807737|-	--	--	24.610738400305	0	7.61545730132671	7.4460653019927e-05	0.0102124029817973
TraesCS6A03G0972700	6A:605976426-605977652|+	--	Glutathione S-transferase, N-terminal||Glutathione S-transferase, C-terminal-like||Glutathione S-transferase Omega/GSH||Thioredoxin-like superfamily||Glutathione S-transferase, C-terminal domain superfamily	24.8955708551045	0	7.63197428107267	7.4460653019927e-05	0.0102124029817973
TraesCS6B03G0636400LC	6B:359958020-359958550|-	--	--	25.2029788261176	0	7.64959072998333	7.4460653019927e-05	0.0102124029817973
TraesCS2A03G1141200LC	2A:726650871-726651215|-	--	--	25.4067619483624	0	7.66115135740163	7.4460653019927e-05	0.0102124029817973
TraesCS4D03G0623200	4D:431492696-431493742|-	--	Pollen allergen Poa p IX/Phl p VI||Pollen allergen/Uncharacterized protein Os	25.4086737909468	0	7.66125937889545	7.4460653019927e-05	0.0102124029817973
TraesCS2D03G1075100LC	2D:587297033-587297509|-	--	--	25.5573052618552	0	7.66963258271071	7.4460653019927e-05	0.0102124029817973
TraesCS5A03G0628700	5A:467849766-467851801|+	--	Pentatricopeptide repeat||Tetratricopeptide-like helical domain superfamily	25.5573052618552	0	7.66963258271071	7.4460653019927e-05	0.0102124029817973
TraesCS5D03G0632600	5D:381798463-381800170|+	--	NAD-dependent epimerase/dehydratase||NAD(P)-binding domain superfamily	25.5739040159877	0	7.67056466959119	7.4460653019927e-05	0.0102124029817973
TraesCS6D03G0102300	6D:24811993-24815802|-	--	Terpene synthase, N-terminal domain||Terpene synthase, metal-binding domain||Terpenoid cyclases/protein prenyltransferase alpha-alpha toroid||Isoprenoid synthase domain superfamily||Terpene cyclase-like 1, C-terminal domain||Terpene synthase, N-terminal domain superfamily	25.6617194286607	0	7.67548586307383	5.79138412377211e-05	0.00839117627553383
TraesCS2A03G1336200	2A:778509329-778513843|-	--	Proton-dependent oligopeptide transporter family||MFS transporter superfamily	25.9656006019038	0	7.69238702735151	5.79138412377211e-05	0.00839117627553383
TraesCS6D03G0488700LC	6D:295551054-295552058|+	--	--	26.988078312791	0	7.74784340879018	4.53238757512601e-05	0.00690102573938707
TraesCS2D03G0687400	2D:382031900-382035616|+	--	Protein kinase domain||S-locus glycoprotein domain||Bulb-type lectin domain||PAN/Apple domain||Serine/threonine-protein kinase, active site||Protein kinase-like domain superfamily||Protein kinase, ATP binding site||S-receptor-like serine/threonine-protein kinase||Bulb-type lectin domain superfamily	27.8011844515383	0	7.79047118926057	3.56804979318428e-05	0.00572691313375354
TraesCS7B03G1192800	7B:716512192-716525552|-	--	C2 domain||C2 domain superfamily	28.0163115387372	0	7.80154183342889	3.56804979318428e-05	0.00572691313375354
TraesCS2A03G1356400LC	2A:783375019-783375339|-	--	--	270.718122403355	1.05644940745369	7.81021948922084	2.13536917228574e-12	6.54748368274648e-09
TraesCS2B03G1081900	2B:618406934-618410515|-	--	Mechanosensitive ion channel MscS||LSM domain superfamily||Mechanosensitive ion channel MscS-like, plants/fungi||Mechanosensitive ion channel MscS domain superfamily	28.3970058465058	0	7.82092692831524	3.56804979318428e-05	0.00572691313375354
TraesCS3D03G0433300LC	3D:199802528-199802845|+	--	--	28.3970058465058	0	7.82092692831524	3.56804979318428e-05	0.00572691313375354
TraesCS3B03G0523800LC	3B:268531828-268535158|-	--	--	28.4124333278361	0	7.82170703621141	3.56804979318428e-05	0.00572691313375354
TraesCS2B03G0065700	2B:16910638-16912587|-	--	Cytochrome P450||Cytochrome P450, E-class, group I||Cytochrome P450, conserved site||Cytochrome P450 superfamily	29.3435727080559	0	7.86802681235805	2.8247060862709e-05	0.00475706184074259
TraesCS4D03G0347400LC	4D:207324397-207324661|+	--	--	29.5472194948577	0	7.87796208720007	2.8247060862709e-05	0.00475706184074259
TraesCS5B03G0544200LC	5B:374362194-374363114|+	--	--	29.6560123321581	0	7.88324183470439	2.24823545641969e-05	0.00397969004880237
TraesCS6B03G0424800LC	6B:181964114-181967557|-	--	--	29.7458866934932	0	7.88758893600308	2.24823545641969e-05	0.00397969004880237
TraesCS1D03G0798300	1D:429756455-429757981|-	--	O-methyltransferase domain||Plant methyltransferase dimerisation||O-methyltransferase COMT-type||S-adenosyl-L-methionine-dependent methyltransferase||Winged helix-like DNA-binding domain superfamily||Winged helix DNA-binding domain superfamily	30.2901395696061	0	7.91363750898258	2.24823545641969e-05	0.00397969004880237
TraesCS6D03G0177300	6D:70667619-70668143|+	--	Basic-leucine zipper domain	30.3192693721031	0	7.91501852292135	2.24823545641969e-05	0.00397969004880237
TraesCS7A03G0388500LC	7A:124465552-124465992|-	--	--	30.6745201600084	0	7.93175508244668	1.79858836513575e-05	0.00329527082612372
TraesCS3B03G0314300LC	3B:125913554-125914409|+	--	--	31.1513168675791	0	7.95391702079285	1.79858836513575e-05	0.00329527082612372
TraesCS2B03G0084600	2B:21354510-21359355|-	--	O-methyltransferase domain||Plant methyltransferase dimerisation||O-methyltransferase COMT-type||S-adenosyl-L-methionine-dependent methyltransferase||Winged helix-like DNA-binding domain superfamily||Winged helix DNA-binding domain superfamily	31.2367064311563	0	7.95785030837661	1.79858836513575e-05	0.00329527082612372
TraesCS2B03G0626800LC	2B:299701021-299701692|-	--	--	31.2367064311563	0	7.95785030837661	1.79858836513575e-05	0.00329527082612372
TraesCS2B03G1377200	2B:752828579-752829712|-	--	Protein of unknown function DUF1677, Oryza sativa	31.2367064311563	0	7.95785030837661	1.79858836513575e-05	0.00329527082612372
TraesCS3D03G0015500LC	3D:2626555-2635338|+	--	--	31.9126746024728	0	7.98861457441827	1.44592397981502e-05	0.0027849435440827
TraesCS3B03G0881600LC	3B:571311959-571312216|+	--	--	32.1832732927065	0	8.00074835536461	1.44592397981502e-05	0.0027849435440827
TraesCS2B03G0343900LC	2B:116740424-116743531|+	--	--	32.5909485413234	0	8.01883817077187	1.44592397981502e-05	0.0027849435440827
TraesCS2B03G1213000LC	2B:685752032-685754095|+	--	--	32.614824112405	0	8.01989060556797	1.44592397981502e-05	0.0027849435440827
TraesCS1D03G0451800LC	1D:252201203-252203788|-	--	--	32.8347473723421	0	8.02954888287131	1.16786167600443e-05	0.00233537316859777
TraesCS5B03G0799700LC	5B:501267009-501269172|+	--	--	32.9267018170359	0	8.03356811632124	1.16786167600443e-05	0.00233537316859777
TraesCS2B03G1233700	2B:695284154-695285042|+	--	Basic-leucine zipper domain||Plant bZIP transcription factors	33.1298401542567	0	8.04240759051129	1.16786167600443e-05	0.00233537316859777
TraesCS2B03G1229600	2B:691804233-691806755|+	--	NB-ARC||P-loop containing nucleoside triphosphate hydrolase||Leucine-rich repeat domain superfamily||Winged helix-like DNA-binding domain superfamily	33.4112097350252	0	8.05456248267434	1.16786167600443e-05	0.00233537316859777
TraesCS3A03G0370000LC	3A:168426550-168427907|-	--	--	33.6406850499464	0	8.06440033155079	1.16786167600443e-05	0.00233537316859777
TraesCS5D03G0653600	5D:388880671-388881947|-	--	SANT/Myb domain||Homeobox-like domain superfamily	34.0764070158069	0	8.08289755911511	9.47510416380966e-06	0.00198865364810218
TraesCS1D03G1011100LC	1D:488606313-488607162|-	--	--	34.2398005113701	0	8.08977323680278	9.47510416380966e-06	0.00198865364810218
TraesCS2D03G1139900	2D:606059660-606063026|-	--	Protein kinase domain||Serine-threonine/tyrosine-protein kinase, catalytic domain||Serine/threonine-protein kinase, active site||Protein kinase-like domain superfamily||Protein kinase, ATP binding site	34.2513987859403	0	8.09026005451911	9.47510416380966e-06	0.00198865364810218
TraesCS2B03G1088500	2B:622013617-622018231|-	--	Leucine-rich repeat domain superfamily||F-box-like domain superfamily	34.4547148721014	0	8.0987673272771	9.47510416380966e-06	0.00198865364810218
TraesCS4D03G0824300	4D:505503451-505508709|+	--	Protein PAIR1	35.1006860337477	0	8.12546828325656	7.72045524458559e-06	0.00168673926375565
TraesCS3B03G0089900	3B:24950675-24952912|-	--	S1/P1 nuclease||Phospholipase C/P1 nuclease domain superfamily	35.5222406261817	0	8.14263033090304	7.72045524458559e-06	0.00168673926375565
TraesCS2A03G1189700LC	2A:740358798-740366904|+	--	--	35.8298971444821	0	8.15502781247307	6.3167361092064e-06	0.00143204530165404
TraesCS2D03G1098700LC	2D:593154954-593155823|-	--	--	36.0408704430959	0	8.16346813724893	6.3167361092064e-06	0.00143204530165404
TraesCS5A03G0711100LC	5A:502441865-502442347|+	--	--	36.1435142001462	0	8.16755677733198	6.3167361092064e-06	0.00143204530165404
TraesCS4D03G0013500	4D:3953221-3956936|+	--	GDSL lipase/esterase||GDSL lipase/esterase-like, plant||SGNH hydrolase superfamily	36.6761048544994	0	8.18858755509591	6.3167361092064e-06	0.00143204530165404
TraesCS5B03G0435900	5B:298531017-298533856|-	--	IQ motif, EF-hand binding site||Domain of unknown function DUF4005	36.7957705932947	0	8.19327099442365	5.18874751827668e-06	0.00121310279401883
TraesCSU03G0281700LC	Un:215185126-215185845|-	--	--	36.9161076004575	0	8.19796542334249	5.18874751827668e-06	0.00121310279401883
TraesCS6D03G0343900LC	6D:151275016-151276053|-	--	--	36.9756181058468	0	8.20028133603684	5.18874751827668e-06	0.00121310279401883
TraesCS5B03G0863500	5B:530388946-530391897|+	--	Leucine-rich repeat||Leucine-rich repeat, typical subtype||Leucine-rich repeat-containing N-terminal, plant-type||Leucine-rich repeat domain superfamily	37.6262418398857	0.000480544549967148	8.21975084627372	5.18874751827668e-06	0.00121310279401883
TraesCS2D03G1152800LC	2D:610595122-610595781|-	--	--	37.8626744620077	0	8.23436847075702	4.27844093612288e-06	0.00104438114798917
TraesCSU03G0064600LC	Un:33530055-33530684|-	--	--	37.8626744620077	0	8.23436847075702	4.27844093612288e-06	0.00104438114798917
TraesCS2B03G0246100LC	2B:73217464-73217880|-	--	--	37.9975224306772	0	8.23948050207613	4.27844093612288e-06	0.00104438114798917
TraesCS3D03G0167300	3D:42915592-42917476|+	--	Cytochrome P450||Cytochrome P450, E-class, group I||Cytochrome P450 superfamily	38.8092413235579	0	8.26987553381122	3.54077870575686e-06	0.000896997272125072
TraesCS6A03G0961400LC	6A:602813221-602813754|-	--	--	39.0186420467996	0	8.27761378822556	3.54077870575686e-06	0.000896997272125072
TraesCS5A03G0653000LC	5A:476583127-476584722|-	--	--	39.3677345779728	0	8.29042268787824	3.54077870575686e-06	0.000896997272125072
TraesCS6B03G1276100LC	6B:724315052-724315543|+	--	--	39.4344553568636	0	8.29285791391801	3.54077870575686e-06	0.000896997272125072
TraesCS2B03G1368100	2B:749788572-749789599|+	--	--	39.7558081851081	0	8.30452966062374	2.94064672173027e-06	0.000775911888712925
TraesCS2D03G1140300	2D:606140224-606145162|+	--	NB-ARC||P-loop containing nucleoside triphosphate hydrolase||Leucine-rich repeat domain superfamily||Winged helix-like DNA-binding domain superfamily||Virus X resistance protein-like, coiled-coil domain||Rx, N-terminal||Apoptotic protease-activating factors, helical domain	755.360355517053	2.11289881490738	8.3676087880018	6.43300752823649e-16	8.21673175884421e-12
TraesCS3D03G1115100	3D:595904780-595906237|+	--	--	41.6012251404366	0	8.36978759513406	2.45053893477523e-06	0.000668410803927036
TraesCS2A03G0729800LC	2A:506638624-506639700|-	--	--	41.9081619019961	0	8.38036088259418	2.04881124054979e-06	0.000578350144475197
TraesCS6A03G0092300LC	6A:23508087-23508392|-	--	--	42.5955087697586	0	8.40376109401236	2.04881124054979e-06	0.000578350144475197
TraesCS3D03G0058900LC	3D:12094722-12097497|+	--	--	42.9862203103852	0	8.41689531573171	1.71835781465466e-06	0.000496629610657937
TraesCS5B03G1113800	5B:629364059-629367535|-	--	Domain of unknown function DUF1618	931.642219692211	2.53736376149487	8.41943907029963	3.48582914491746e-16	5.46988107469519e-12
TraesCS5B03G0422400LC	5B:287240838-287242797|+	--	--	43.0687922005337	1.45087954759459e-08	8.41965565628001	1.71835781465466e-06	0.000496629610657937
TraesCS4A03G0487500	4A:450740222-450741166|-	--	Pyridoxal 5'-phosphate synthase subunit PdxS/SNZ||Ribulose-phosphate binding barrel||Aldolase-type TIM barrel||PdxS/SNZ N-terminal domain	43.3222506988688	2.49367707954193e-06	8.42806733588506	1.71835781465466e-06	0.000496629610657937
TraesCS4B03G0855500	4B:619807926-619809991|-	--	AMP-dependent synthetase/ligase||AMP-binding enzyme, C-terminal domain||ANL, N-terminal domain	45.4352093544092	0	8.49660423562111	1.21972719879504e-06	0.000378782802736398
TraesCS2D03G1055300LC	2D:578890569-578895405|+	--	--	48.956270851833	0	8.60399986718025	6.35441048929898e-07	0.000222746720384415
TraesCSU03G0031400	Un:22097965-22098910|-	--	Thioredoxin domain||Thioredoxin-like superfamily	51.1706990895366	0	8.66766367915145	4.65726979961044e-07	0.000174736046658802
TraesCS3A03G0069000LC	3A:19857066-19859714|-	--	--	51.1768903937835	0	8.66783779561828	4.65726979961044e-07	0.000174736046658802
TraesCSU03G0296900LC	Un:220904823-220906384|+	--	--	51.7246762773837	0	8.68316044974986	4.65726979961044e-07	0.000174736046658802
TraesCS2B03G0381900LC	2B:137934793-137936756|+	--	--	51.748876185588	0	8.68383362990568	4.65726979961044e-07	0.000174736046658802
TraesCS2A03G1210900LC	2A:748273602-748273904|-	--	--	57.7405785545617	0	8.84152757476736	1.93557701924733e-07	8.30119816164657e-05
TraesCS2D03G1315200	2D:649531210-649534962|-	--	--	57.7405785545617	0	8.84152757476736	1.93557701924733e-07	8.30119816164657e-05
TraesCS6A03G0169600LC	6A:47884737-47886081|+	--	--	57.8746632482575	0	8.84486661913947	1.93557701924733e-07	8.30119816164657e-05
TraesCS1D03G0939800LC	1D:471621586-471623451|-	--	--	58.6871454161119	0	8.86493582219176	1.68420338038404e-07	7.34114532273279e-05
TraesCS1A03G0586700LC	1A:396189396-396191241|-	--	--	60.4265456381704	0	8.90698468351443	1.28242165867606e-07	5.92230038979698e-05
TraesCS4A03G0077100LC	4A:32626830-32629658|+	--	--	61.9149196078977	0	8.94201706037558	1.12211895134155e-07	5.34529377606916e-05
TraesCS3B03G0086600LC	3B:23951931-23952282|+	--	--	61.9408104906719	0	8.94261899810327	9.83585747472227e-08	4.78798054736663e-05
TraesCS5A03G1274800	5A:703050171-703051349|-	--	Phosphoribosyltransferase domain||Ribose-phosphate pyrophosphokinase||Phosphoribosyltransferase-like||Ribose-phosphate pyrophosphokinase, N-terminal domain||Ribose-phosphate pyrophosphokinase, bacterial-type	64.2062508507707	0	8.99433903718418	7.59583703895684e-08	3.90417242487886e-05
TraesCS3A03G0932900LC	3A:645340443-645341315|-	--	--	67.8335803284554	0	9.07347364278154	5.21777744614682e-08	2.81190770006894e-05
TraesCS2D03G1325800LC	2D:651902931-651905069|-	--	--	68.1528140316138	0	9.08023468481034	4.61803291210696e-08	2.52958205263584e-05
TraesCS5A03G0986300LC	5A:606834732-606836143|+	--	--	68.5263	0	9.08810512348934	4.61803291210696e-08	2.52958205263584e-05
TraesCS1A03G0951800	1A:560092718-560093199|+	--	--	69.2576529299662	0	9.10339243496104	4.09325644482208e-08	2.29394346474945e-05
TraesCS5D03G0067200LC	5D:25362792-25363238|-	--	--	84.4141746068631	0.0226757959185273	9.14492363874289	7.83153904088931e-09	5.8193352494363e-06
TraesCS2B03G0785400LC	2B:430497469-430499600|+	--	--	73.3734643261832	0.0035844194247544	9.1451965934166	2.56225983074686e-08	1.5712837527587e-05
TraesCS2D03G1121800LC	2D:601243018-601254626|+	--	--	72.1625652797383	0	9.16256397469236	2.87473054181356e-08	1.72328790861615e-05
TraesCS2B03G0581500LC	2B:252638360-252639169|+	--	--	76.8068932893913	0	9.25239691091482	1.82837411756578e-08	1.16683511866471e-05
TraesCSU03G0039400	Un:23436755-23437707|+	--	Amino acid/polyamine transporter I	77.6184826471157	0	9.26753661071389	1.63791848031934e-08	1.07090964169115e-05
TraesCSU03G0391000	Un:255479376-255480906|-	--	Cathepsin propeptide inhibitor domain (I29)||Papain-like cysteine peptidase superfamily	77.8192603933874	0	9.27125760968155	1.63791848031934e-08	1.07090964169115e-05
TraesCS7D03G0873800	7D:480874711-480876224|-	--	Plant peroxidase||Haem peroxidase||Haem peroxidase superfamily||Peroxidases heam-ligand binding site||Peroxidase, active site||Secretory peroxidase	83.2978838164169	0	9.36925661453561	8.67364001302795e-09	6.2534600266901e-06
TraesCS5D03G0716600	5D:413663401-413664380|-	--	AP2/ERF domain||DNA-binding domain superfamily||AP2/ERF domain superfamily	83.6294770837953	0	9.37497966273508	8.67364001302795e-09	6.2534600266901e-06
TraesCS4B03G0971100	4B:660681544-660682824|-	--	Phosphoribosyltransferase domain||Ribose-phosphate pyrophosphokinase||Phosphoribosyltransferase-like||Ribose-phosphate pyrophosphokinase, N-terminal domain||Ribose-phosphate pyrophosphokinase, bacterial-type	93.4510950585133	0	9.5349513104476	3.26458618107822e-09	2.91257862764022e-06
TraesCS1B03G0985500LC	1B:597385310-597385636|+	--	--	98.4429536012199	0	9.60992906576145	2.07134603726192e-09	1.95248151554766e-06
TraesCS3B03G0026800	3B:6220941-6222881|-	--	Flavin monooxygenase FMO||FAD/NAD(P)-binding domain||FAD/NAD(P)-binding domain superfamily||Flavin monooxygenase-like	103.695822331356	1.02833686698674e-07	9.68483225706771	1.34054433625197e-09	1.40236708681795e-06
TraesCS2A03G1211000LC	2A:748274097-748275864|-	--	--	105.068921632071	0	9.7037887771814	1.23155699184124e-09	1.31412057257428e-06
TraesCS2A03G1367100	2A:786214938-786217064|+	--	Protein of unknown function DUF247, plant	107.908622216722	0	9.74221739828245	9.58987511987962e-10	1.0571054078426e-06
TraesCS2A03G1210500	2A:748096638-748097752|+	--	Protein of unknown function DUF1677, Oryza sativa	113.928886985598	0	9.82045182963245	5.92055267264539e-10	6.74943004681574e-07
TraesCS7D03G0846300LC	7D:463204496-463204807|+	--	--	118.831845506272	0	9.88117391438852	4.02924468340036e-10	4.92868578945307e-07
TraesCS4A03G0605800LC	4A:536208427-536209728|+	--	--	119.160117228964	0	9.88514963500124	4.02924468340036e-10	4.92868578945307e-07
TraesCSU03G0383100LC	Un:252414112-252415669|-	--	--	160.430080325376	0.0346916702654139	9.95619082866397	2.71620199666661e-11	5.44792514759988e-08
TraesCS2B03G1349100LC	2B:742073393-742074993|+	--	--	127.679793442938	0	9.98467660585024	2.08781613657835e-10	2.79872277685246e-07

## Sheet: DOWN
Table S2 Differentially expressed genes (DEGs) between the resistant and susceptible bulks of Lxd-682 × Langdon (LDN).
Gene_ID	Locus	gene_name	gene_description	23zj93R	23zj93S	logFC	PValue	FDR
TraesCSU03G0457700	Un:283059179-283059475|-	--	--	0	24707.0181879435	-17.6121	7.02588370749443e-33	1.87422473781121e-27
TraesCS3D03G0208300	3D:54938302-54940191|-	--	UDP-glucuronosyl/UDP-glucosyltransferase||UDP-glycosyltransferase family, conserved site	0	975.610913994105	-12.9498	6.67127051241353e-19	4.44907030472858e-14
TraesCS2D03G1115300	2D:597928500-597931204|-	--	NAD-dependent epimerase/dehydratase||NAD(P)-binding domain superfamily	0	565.200543894807	-12.1624	1.41626606514399e-16	2.69859382527007e-12
TraesCSU03G0494300	Un:300825488-300825784|+	--	--	0	493.884601317116	-11.9678	5.26047603987238e-16	7.38570835998082e-12
TraesCSU03G0208500LC	Un:174637669-174637965|+	--	--	0	375.575567326814	-11.5729	7.53407464352308e-15	5.16166680440422e-11
TraesCS4B03G0851100	4B:618292273-618298493|+	--	Major facilitator superfamily||Major facilitator superfamily domain||MFS transporter superfamily	0	340.260802528573	-11.4305	1.9125349548382e-14	1.15951778307418e-10
TraesCS7A03G0909300	7A:550530044-550541792|+	--	Aminotransferase class-III||Pyridoxal phosphate-dependent transferase, major domain||Pyridoxal phosphate-dependent transferase, small domain||Pyridoxal phosphate-dependent transferase	0	314.59501157081	-11.3174	4.06075828790123e-14	2.30478272527773e-10
TraesCS4B03G1005300	4B:669013179-669014255|+	--	Oxoglutarate/iron-dependent dioxygenase||Non-haem dioxygenase N-terminal domain||Isopenicillin N synthase-like superfamily	0	314.592441268567	-11.3174	4.06075828790123e-14	2.30478272527773e-10
TraesCS3B03G1212900	3B:750993564-750995845|+	--	Multicopper oxidase, type 1||Multicopper oxidase, copper-binding site||Cupredoxin||Multicopper oxidase, type 2||Multicopper oxidase, type 3||Laccase||Multicopper oxidases, conserved site||Laccase, second cupredoxin domain||Laccase, first cupredoxin domain||Laccase, third cupredoxin domain	0	296.862283494487	-11.2337	7.08494070362163e-14	3.85709955530226e-10
TraesCSU03G0297300	Un:221069272-221070048|-	--	Dirigent protein||Allene oxide cyclase/Dirigent protein	0	283.34469840629	-11.1665	1.11715961192332e-13	5.84340192307186e-10
TraesCS7B03G1006900	7B:645921005-645922052|+	--	Germin||Cupin 1||RmlC-like cupin domain superfamily||RmlC-like jelly roll fold||Germin, manganese binding site	0	255.660756603793	-11.0182	2.97124043103774e-13	1.36656568514419e-09
TraesCS7D03G1108200	7D:582657750-582660275|+	--	Ureide permease||Ureide permease, plant	0	235.588217862173	-10.9003	6.36837719191202e-13	2.57398227229462e-09
TraesCS5A03G1172700	5A:667913527-667919162|+	--	Major facilitator superfamily||Major facilitator superfamily domain||MFS transporter superfamily	0	216.984663426071	-10.7817	1.3925838494359e-12	4.95314223567359e-09
TraesCS4D03G0665400	4D:451490279-451493387|-	--	Tetratricopeptide-like helical domain superfamily	0	208.400685937878	-10.7235	2.06325843786696e-12	6.39993977773709e-09
TraesCSU03G0523100LC	Un:317598081-317598377|+	--	--	0	200.182178235033	-10.6655	2.96595691815297e-12	8.59998551615745e-09
TraesCS2A03G0201900LC	2A:56782061-56782723|-	--	--	0	195.443140378933	-10.631	3.74678194389032e-12	1.00958742560826e-08
TraesCSU03G0360100LC	Un:244004160-244006064|+	--	--	0	185.231677666656	-10.5536	6.08208355127052e-12	1.52345217688884e-08
TraesCS6D03G0715000LC	6D:436092369-436093586|+	--	--	0	182.54401380689	-10.5325	7.06661153650749e-12	1.72943971878783e-08
TraesCS3A03G1048000	3A:690810866-690813276|+	--	Multicopper oxidase, type 1||Multicopper oxidase, copper-binding site||Cupredoxin||Multicopper oxidase, type 2||Multicopper oxidase, type 3||Laccase||Multicopper oxidases, conserved site||Laccase, second cupredoxin domain||Laccase, first cupredoxin domain||Laccase, third cupredoxin domain	0	181.030464110154	-10.5205	7.43275721197419e-12	1.80251119442385e-08
TraesCS6D03G0772100	6D:456186792-456187856|+	--	Dehydrin||Dehydrin, conserved site	0	176.594106908344	-10.4848	9.60589390941403e-12	2.20902436144421e-08
TraesCS3D03G0061500	3D:12415658-12416526|+	--	Proteinase inhibitor I12, Bowman-Birk||Bowman-Birk type proteinase inhibitor	0	176.427051044766	-10.4834	9.60589390941403e-12	2.20902436144421e-08
TraesCS7A03G0549700LC	7A:218504879-218505301|+	--	--	0	147.446862013883	-10.2247	4.91874546024125e-11	8.74749692649304e-08
TraesCS3D03G0884400	3D:516621798-516625188|-	--	Oxoglutarate/iron-dependent dioxygenase||Non-haem dioxygenase N-terminal domain||Isopenicillin N synthase-like superfamily	0	146.751830098178	-10.2179	5.23005846405398e-11	9.23953904550358e-08
TraesCSU03G0250000	Un:198654196-198657453|-	--	Protein kinase domain||Legume lectin domain||Serine/threonine-protein kinase, active site||Protein kinase-like domain superfamily||Concanavalin A-like lectin/glucanase domain superfamily||Protein kinase, ATP binding site	0	141.564220598795	-10.166	7.14954491616475e-11	1.199504781029e-07
TraesCS7D03G0261400	7D:73530906-73532757|-	--	UDP-glucuronosyl/UDP-glucosyltransferase||UDP-glycosyltransferase family, conserved site	0	136.225218583834	-10.1106	1.05442579793206e-10	1.64386924549344e-07
TraesCS3A03G1202700	3A:731724492-731725240|+	--	ABA/WDS induced protein	0	131.250642091738	-10.057	1.47509614195326e-10	2.16206948806292e-07
TraesCS2B03G1238100	2B:697805937-697808161|+	Ppo-B2	Tyrosinase copper-binding domain||Uncharacterised domain, di-copper centre||Polyphenol oxidase||Polyphenol oxidase, central domain||Polyphenol oxidase, C-terminal	0	118.584864928359	-9.91073	3.46840205465053e-10	4.36429684952159e-07
TraesCS4B03G0073700	4B:27495249-27495922|+	--	Germin||Cupin 1||RmlC-like cupin domain superfamily||RmlC-like jelly roll fold||Germin, manganese binding site	0	116.325159523411	-9.883	4.34650804429802e-10	5.22633330941339e-07
TraesCS5B03G1203800	5B:663789553-663791286|+	--	--	0	114.611792279662	-9.86162	4.69146900019469e-10	5.46504921612199e-07
TraesCS4A03G0719200	4A:585590950-585591606|+	--	Germin||Cupin 1||RmlC-like cupin domain superfamily||RmlC-like jelly roll fold||Germin, manganese binding site	0	114.592	-9.86137	4.69146900019469e-10	5.46504921612199e-07
TraesCS4A03G1085400	4A:710531827-710533511|-	--	Chalcone/stilbene synthase, N-terminal||Polyketide synthase, type III||Chalcone/stilbene synthase, C-terminal||Thiolase-like	0	114.298293132038	-9.85767	5.06678652021026e-10	5.825930914359e-07
TraesCS1B03G0213000LC	1B:73275599-73276390|+	--	--	0	114.096536004999	-9.85512	5.06678652021026e-10	5.825930914359e-07
TraesCS6B03G0880000	6B:557840392-557840871|-	--	--	0	110.687237810145	-9.81141	6.40584387532123e-10	7.27158686034336e-07
TraesCS3A03G0615700	3A:460187504-460188672|+	--	Glycoside hydrolase family 18, catalytic domain||Glycosyl hydrolases family 18 (GH18) active site||Glycoside hydrolase superfamily	0	102.475592523008	-9.70033	1.34054433625197e-09	1.40236708681795e-06
TraesCS5A03G0113000	5A:42574896-42575980|+	--	Germin||Cupin 1||RmlC-like cupin domain superfamily||RmlC-like jelly roll fold||Germin, manganese binding site	0	100.826483762559	-9.67695	1.4602357948459e-09	1.49820192551189e-06
TraesCS6B03G1146000	6B:690016246-690018781|+	--	--	0	100.575472087029	-9.67336	1.59178856915634e-09	1.59175157263841e-06
TraesCS1B03G1264100LC	1B:691362925-691366029|+	--	--	0	95.8676923480365	-9.60428	2.26492977906211e-09	2.11997427320213e-06
TraesCS3A03G0611000LC	3A:455795372-455795644|-	--	--	0	93.8040407512892	-9.57293	2.71465977113102e-09	2.48000904296888e-06
TraesCS5B03G1211700	5B:666788941-666792805|-	--	Pectinacetylesterase/NOTUM	0	92.9675478559248	-9.56002	2.97568474912439e-09	2.68173535025819e-06
TraesCS1B03G1219600LC	1B:678984147-678984740|-	--	--	0	92.5785153958587	-9.55398	3.26458618107822e-09	2.91257862764022e-06
TraesCS5D03G0997000LC	5D:505300013-505300312|+	--	--	0	91.969879966358	-9.54448	3.26458618107822e-09	2.91257862764022e-06
TraesCS5B03G0829800	5B:516686066-516688284|+	--	FAD linked oxidase, N-terminal||D-arabinono-1,4-lactone oxidase||L-gulonolactone oxidase, plant||FAD-binding domain, PCMH-type||FAD-binding, type PCMH, subdomain 1||FAD-binding, type PCMH, subdomain 2||Vanillyl-alcohol oxidase, C-terminal subdomain 2||FAD-binding, type PCMH-like superfamily	0	89.7981996335637	-9.51005	3.93955886266399e-09	3.32568582976028e-06
TraesCS6A03G0011900	6A:2793785-2794712|-	--	Rhodanese-like domain||Rhodanese-like domain superfamily	0	89.7981996335637	-9.51005	3.93955886266399e-09	3.32568582976028e-06
TraesCS7A03G1333700	7A:729007874-729008899|+	--	Glycoside hydrolase, family 19, catalytic||Glycoside hydrolase, family 19||Lysozyme-like domain superfamily	0	89.7981996335637	-9.51005	3.93955886266399e-09	3.32568582976028e-06
TraesCS7D03G0132100LC	7D:32964865-32967166|+	--	--	0	88.9252362572908	-9.49597	4.33351474893039e-09	3.55694890592207e-06
TraesCS5B03G1089500	5B:620096461-620096958|+	--	Cysteine-rich secretory protein-related||Venom allergen 5-like||CAP domain||Allergen V5/Tpx-1-related, conserved site||CAP superfamily	0	87.8828958981186	-9.47899	4.77124351144862e-09	3.84524748977049e-06
TraesCS3A03G0309600LC	3A:121017321-121017626|+	--	--	0	87.4230055892554	-9.47143	5.2581050942495e-09	4.18702123863283e-06
TraesCS3D03G0303800	3D:106204376-106209231|+	--	Oxygen oxidoreductase covalent FAD-binding site||FAD linked oxidase, N-terminal||Cytokinin dehydrogenase 1, FAD/cytokinin binding domain||FAD-linked oxidase-like, C-terminal||FAD-binding domain, PCMH-type||FAD-binding, type PCMH, subdomain 1||FAD-binding, type PCMH, subdomain 2||Cytokinin dehydrogenase, C-terminal domain superfamily||FAD-binding, type PCMH-like superfamily	0	83.1506286346835	-9.39925	7.83153904088931e-09	5.8193352494363e-06
TraesCS3B03G1199000	3B:745631611-745634419|+	--	Alcohol dehydrogenase, zinc-type, conserved site||GroES-like superfamily||Alcohol dehydrogenase, C-terminal||Alcohol dehydrogenase, N-terminal||Polyketide synthase, enoylreductase domain||NAD(P)-binding domain superfamily	0	81.3466043739342	-9.36765	9.61642697096576e-09	6.69785393935986e-06
TraesCS4D03G0590000	4D:410304894-410315508|+	--	Transcription factor, MADS-box||Transcription factor, K-box||MADS MEF2-like||Transcription factor, MADS-box superfamily	0	80.9189681890558	-9.36006	9.61642697096576e-09	6.69785393935986e-06
TraesCS7B03G0699000	7B:472726320-472730691|+	--	Cytochrome P450||Cytochrome P450, E-class, group IV||Cytochrome P450, conserved site||Cytochrome P450 superfamily	9.46566861550192	6160.14463084332	-9.35956	6.6922861086819e-22	8.92617121175992e-17
TraesCS7D03G1093000	7D:579297836-579298840|+	--	Germin||Cupin 1||RmlC-like cupin domain superfamily||RmlC-like jelly roll fold||Germin, manganese binding site	0	77.1208067441194	-9.29081	1.46906090502869e-08	9.82172147933467e-06
TraesCS7A03G1064300	7A:638621832-638622275|+	--	Late embryogenesis abundant protein, LEA_1 subgroup	0	76.0643573366658	-9.27094	1.63791848031934e-08	1.07090964169115e-05
TraesCS7A03G0147000	7A:34457023-34457283|+	--	Late embryogenesis abundant protein, LEA_1 subgroup	0	72.8950091143047	-9.20964	2.56225983074686e-08	1.5712837527587e-05
TraesCS3B03G0170700	3B:55413707-55414267|+	--	Cytochrome P450||Cytochrome P450, E-class, group I||Cytochrome P450, conserved site||Cytochrome P450 superfamily	0	72.2427314681325	-9.1967	2.56225983074686e-08	1.5712837527587e-05
TraesCS4A03G0234200	4A:137955267-137956697|+	--	Protein of unknown function DUF1262	0	71.838559706851	-9.18861	2.87473054181356e-08	1.72328790861615e-05
TraesCS2B03G1219000	2B:688593618-688594244|+	--	--	0	69.7256608919436	-9.14562	3.63333999034768e-08	2.07543849213094e-05
TraesCS7A03G1279100LC	7A:713739704-713740036|+	--	--	0	68.9735288676653	-9.13	4.09325644482208e-08	2.29394346474945e-05
TraesCS3B03G0373400LC	3B:160902386-160902688|-	--	--	0	66.3670696508351	-9.07453	5.21777744614682e-08	2.81190770006894e-05
TraesCS3A03G0635700LC	3A:476343536-476344081|-	--	--	0	66.268232883211	-9.07238	5.21777744614682e-08	2.81190770006894e-05
TraesCS3D03G0717200	3D:430541746-430542081|-	--	EF-hand domain||EF-hand domain pair||Calcium-binding protein KIC/PBP1/KRP1	0	65.2803413073333	-9.05075	5.90432711011353e-08	3.16272750982708e-05
TraesCS3B03G1213000	3B:751007662-751009957|+	--	Multicopper oxidase, type 1||Multicopper oxidase, copper-binding site||Cupredoxin||Multicopper oxidase, type 2||Multicopper oxidase, type 3||Laccase||Multicopper oxidases, conserved site||Laccase, second cupredoxin domain||Laccase, first cupredoxin domain||Laccase, third cupredoxin domain	0	64.4434138546751	-9.03217	6.69157072479532e-08	3.48641290341093e-05
TraesCS5D03G0003100	5D:2121153-2121944|+	--	--	0	63.3869644472215	-9.00837	7.59583703895684e-08	3.90417242487886e-05
TraesCS6D03G0911000LC	6D:490801101-490802443|-	--	--	0	62.3305150397678	-8.98417	8.63636266073176e-08	4.34686057240907e-05
TraesCS4B03G0705200LC	4B:534840902-534841763|+	--	--	0	61.6478939320235	-8.96832	9.83585747472227e-08	4.78798054736663e-05
TraesCS6A03G0284400	6A:94975108-94976096|+	--	Helix-turn-helix motif||Homeobox domain||Leucine zipper, homeobox-associated||Homeobox-like domain superfamily||Homeobox, conserved site	0	61.2740656323141	-8.95956	9.83585747472227e-08	4.78798054736663e-05
TraesCS3A03G0352800	3A:154497270-154503596|+	--	Cytochrome P450||Cytochrome P450, E-class, group I||Cytochrome P450, conserved site||Cytochrome P450 superfamily	0	60.8884125902707	-8.95047	1.12211895134155e-07	5.34529377606916e-05
TraesCS4B03G0104700	4B:39467536-39469040|-	--	NADH:flavin oxidoreductase/NADH oxidase, N-terminal||Aldolase-type TIM barrel	0	60.670110410409	-8.9453	1.12211895134155e-07	5.34529377606916e-05
TraesCS4B03G0074000	4B:27513041-27513715|+	--	Germin||Cupin 1||RmlC-like cupin domain superfamily||RmlC-like jelly roll fold||Germin, manganese binding site	0.946566861550192	513.981309381961	-8.93725	3.8156659533983e-15	2.99372661684862e-11
TraesCS2B03G1217700	2B:688137855-688138091|+	--	--	0	59.4235948003461	-8.91541	1.28242165867606e-07	5.92230038979698e-05
TraesCS2D03G1072400LC	2D:584571356-584571769|+	--	--	0	59.1611668174067	-8.90904	1.28242165867606e-07	5.92230038979698e-05
TraesCS7D03G1093200	7D:579433002-579434807|+	--	--	0.946566861550192	501.813468540503	-8.90269	4.78662077771692e-15	3.54688599628824e-11
TraesCS5A03G0564600	5A:436476913-436477520|+	--	Chlorophyll A-B binding protein	0	58.104717409953	-8.8831	1.68420338038404e-07	7.34114532273279e-05
TraesCS6A03G0618900	6A:423832388-423833348|+	--	SANT/Myb domain||Homeobox-like domain superfamily||Myb domain	0	58.104717409953	-8.8831	1.68420338038404e-07	7.34114532273279e-05
TraesCS6B03G0350600	6B:142248838-142253206|-	--	GDSL lipase/esterase||GDSL lipase/esterase-like, plant||SGNH hydrolase superfamily	0	57.0308238993073	-8.85624	1.93557701924733e-07	8.30119816164657e-05
TraesCS2B03G0599500LC	2B:262757927-262759298|-	--	--	0	56.0932290153864	-8.83238	2.22884626458782e-07	9.31923243795373e-05
TraesCS7D03G0266900LC	7D:75703883-75721996|-	--	--	0	55.8897364029333	-8.82715	2.22884626458782e-07	9.31923243795373e-05
TraesCS4D03G0450000	4D:314869190-314870842|-	--	Glycosyl transferase, family 8||Nucleotide-diphospho-sugar transferases	0	55.0245043107133	-8.80469	2.57174568990903e-07	0.000105059552869852
TraesCSU03G0522500LC	Un:317416913-317417230|+	--	--	0	54.007544683607	-8.77783	2.97358095395732e-07	0.000119103972263912
TraesCS4D03G0182400LC	4D:68940716-68941072|-	--	--	0	53.8789197801382	-8.7744	2.97358095395732e-07	0.000119103972263912
TraesCS4D03G0757400	4D:486059224-486059592|+	--	--	0	53.8789197801382	-8.7744	2.97358095395732e-07	0.000119103972263912
TraesCS4B03G0104500LC	4B:39368601-39419952|-	--	--	0	53.6610464602131	-8.76857	2.97358095395732e-07	0.000119103972263912
TraesCS2B03G1361900	2B:746524513-746525285|+	--	--	0	51.7907300627973	-8.71751	4.00131630670756e-07	0.000154525252131606
TraesCS5D03G0402700LC	5D:259483326-259484368|-	--	--	0	50.7095715577772	-8.68714	4.65726979961044e-07	0.000174736046658802
TraesCS6B03G1180900LC	6B:701163479-701165488|-	--	--	0	49.8180151493799	-8.66162	5.43348143287882e-07	0.000199372146772318
TraesCS7B03G0176500LC	7B:73172666-73173172|-	--	--	0	49.6085644818258	-8.65555	5.43348143287882e-07	0.000199372146772318
TraesCS1A03G0003100LC	1A:362324-367306|-	--	--	53.7764115008492	21223.6947683136	-8.6537	3.92110961641118e-21	3.48665067091282e-16
TraesCS5D03G0998900	5D:505862107-505864060|+	--	Protein kinase domain||Tyrosine-protein kinase, active site||Protein kinase-like domain superfamily||Protein kinase, ATP binding site	0	49.2957822590894	-8.64645	5.43348143287882e-07	0.000199372146772318
TraesCS1A03G0102300LC	1A:25487393-25488349|-	--	--	0	49.1110327048526	-8.64105	6.35441048929898e-07	0.000222746720384415
TraesCS4B03G0967000	4B:660368491-660369305|-	--	Germin||Cupin 1||RmlC-like cupin domain superfamily||RmlC-like jelly roll fold||Germin, manganese binding site	0	48.8797771247139	-8.63426	6.35441048929898e-07	0.000222746720384415
TraesCS5A03G0781000LC	5A:534793973-534794314|-	--	--	0	48.7716152905804	-8.63107	6.35441048929898e-07	0.000222746720384415
TraesCS7A03G1147100	7A:673215729-673216731|+	--	Germin||Cupin 1||RmlC-like cupin domain superfamily||RmlC-like jelly roll fold||Germin, manganese binding site	0	48.5966727428698	-8.6259	6.35441048929898e-07	0.000222746720384415
TraesCS7D03G0580400LC	7D:233582088-233582606|-	--	--	0	47.1100331801187	-8.58119	8.75701578622086e-07	0.000289618946769397
TraesCS2B03G1335800	2B:737533342-737533891|+	--	--	0	46.4837739279624	-8.56193	8.75701578622086e-07	0.000289618946769397
TraesCS2D03G0129400LC	2D:29874902-29875243|+	--	--	0	46.3749682164832	-8.55856	8.75701578622086e-07	0.000289618946769397
TraesCS2A03G1201000	2A:744119588-744121474|-	--	Pyridoxal phosphate-dependent decarboxylase||Aromatic-L-amino-acid decarboxylase||Pyridoxal phosphate-dependent transferase, major domain||Pyridoxal phosphate-dependent transferase, small domain||Pyridoxal phosphate-dependent transferase||Pyridoxal-phosphate binding site	0	46.3537380386571	-8.5579	8.75701578622086e-07	0.000289618946769397
TraesCS2A03G1201300	2A:744183000-744184909|-	--	Pyridoxal phosphate-dependent decarboxylase||Aromatic-L-amino-acid decarboxylase||Pyridoxal phosphate-dependent transferase, major domain||Pyridoxal phosphate-dependent transferase, small domain||Pyridoxal phosphate-dependent transferase||Pyridoxal-phosphate binding site	0	45.7842909582003	-8.54012	1.03207686051889e-06	0.000329080574685889
TraesCSU03G0370600	Un:247628262-247629074|+	--	Germin||Cupin 1||RmlC-like cupin domain superfamily||RmlC-like jelly roll fold||Germin, manganese binding site	0	45.6934293671438	-8.53726	1.03207686051889e-06	0.000329080574685889
TraesCS1B03G0877500LC	1B:551351677-551351871|-	--	--	0	45.3134285760175	-8.52524	1.03207686051889e-06	0.000329080574685889
TraesCSU03G0230100LC	Un:189068122-189068316|+	--	--	0	45.3134285760175	-8.52524	1.03207686051889e-06	0.000329080574685889
TraesCSU03G0355400LC	Un:242299906-242301158|+	--	--	0	44.3908021469005	-8.49565	1.21972719879504e-06	0.000378782802736398
TraesCS3D03G0964600	3D:550482060-550483518|+	--	Protein kinase domain||NAF domain||Serine/threonine-protein kinase, active site||Protein kinase-like domain superfamily||Protein kinase, ATP binding site||NAF/FISL domain	0	44.1723520382048	-8.48855	1.44560260597931e-06	0.000432804659002292
TraesCS4B03G0082600LC	4B:30168142-30168789|+	--	--	0	43.8881049652528	-8.47926	1.44560260597931e-06	0.000432804659002292
TraesCS2D03G0167600LC	2D:38734582-38737826|-	--	--	0	43.4370407645833	-8.4644	1.44560260597931e-06	0.000432804659002292
TraesCS5A03G0666500	5A:481094385-481095065|-	--	--	0	43.3144257056013	-8.46033	1.44560260597931e-06	0.000432804659002292
TraesCS6D03G0283600	6D:113320947-113322638|+	--	NADP-dependent oxidoreductase domain||NADP-dependent oxidoreductase domain superfamily	0	43.3144257056013	-8.46033	1.44560260597931e-06	0.000432804659002292
TraesCS7B03G0341200LC	7B:161023832-161024227|-	--	--	0	43.3144257056013	-8.46033	1.44560260597931e-06	0.000432804659002292
TraesCSU03G0508300	Un:308136699-308136995|-	--	--	0	42.7884702087223	-8.44276	1.71835781465466e-06	0.000496629610657937
TraesCSU03G0518500	Un:314537313-314537609|-	--	--	0	42.7884702087223	-8.44276	1.71835781465466e-06	0.000496629610657937
TraesCS2A03G1201200	2A:744158804-744160698|-	--	Pyridoxal phosphate-dependent decarboxylase||Aromatic-L-amino-acid decarboxylase||Pyridoxal phosphate-dependent transferase, major domain||Pyridoxal phosphate-dependent transferase, small domain||Pyridoxal phosphate-dependent transferase||Pyridoxal-phosphate binding site	0	42.0310457497614	-8.41706	2.04881124054979e-06	0.000578350144475197
TraesCS3D03G0977300	3D:555006121-555008205|+	--	Multicopper oxidase, type 1||Multicopper oxidase, copper-binding site||Cupredoxin||Multicopper oxidase, type 2||Multicopper oxidase, type 3||Laccase||Multicopper oxidases, conserved site||Laccase, second cupredoxin domain||Laccase, first cupredoxin domain||Laccase, third cupredoxin domain	0	41.8803608625744	-8.4119	2.04881124054979e-06	0.000578350144475197
TraesCS4B03G0116500	4B:45302469-45303533|-	--	--	0	41.3042609868945	-8.39197	2.04881124054979e-06	0.000578350144475197
TraesCS3A03G0216300	3A:63773666-63775364|+	--	Lecithin:cholesterol/phospholipid:diacylglycerol acyltransferase||Alpha/Beta hydrolase fold	0	41.2015268906939	-8.38839	2.45053893477523e-06	0.000668410803927036
TraesCS7A03G0134700	7A:30790559-30792469|-	--	Pyridoxal phosphate-dependent decarboxylase||Aromatic-L-amino-acid decarboxylase||Pyridoxal phosphate-dependent transferase, major domain||Pyridoxal phosphate-dependent transferase, small domain||Pyridoxal phosphate-dependent transferase||Pyridoxal-phosphate binding site	0	41.2015268906939	-8.38839	2.45053893477523e-06	0.000668410803927036
TraesCS4A03G0860700LC	4A:624832970-624833353|+	--	--	0	40.8277406891621	-8.37528	2.45053893477523e-06	0.000668410803927036
TraesCSU03G0115400LC	Un:59830732-59966349|-	--	--	0	40.4293280314204	-8.36118	2.45053893477523e-06	0.000668410803927036
TraesCS2B03G0323100	2B:106836933-106838650|+	--	UDP-glucuronosyl/UDP-glucosyltransferase||UDP-glycosyltransferase family, conserved site	0	40.2674970373941	-8.35541	2.94064672173027e-06	0.000775911888712925
TraesCS1B03G1244400LC	1B:684608969-684613556|-	--	--	0	40.1724778002623	-8.35201	2.94064672173027e-06	0.000775911888712925
TraesCS3A03G0268800	3A:98913294-98913818|-	--	--	0	40.1450774832403	-8.35103	2.94064672173027e-06	0.000775911888712925
TraesCS6D03G0772200	6D:456384024-456384305|+	--	Dehydrin	0	40.1450774832403	-8.35103	2.94064672173027e-06	0.000775911888712925
TraesCS4B03G0905200	4B:640529086-640531171|+	--	Aerolysin||Agglutinin domain||Agglutinin domain superfamily	0	40.0333824963422	-8.34702	2.94064672173027e-06	0.000775911888712925
TraesCS7B03G0851100LC	7B:571325061-571325417|+	--	--	0	39.091507397079	-8.31278	3.54077870575686e-06	0.000896997272125072
TraesCS1B03G1038000	1B:621368991-621370294|+	--	Late embryogenesis abundant protein, LEA_4 subgroup	0	39.0886280757866	-8.31268	3.54077870575686e-06	0.000896997272125072
TraesCS3B03G0734900	3B:470671893-470673691|-	--	Major facilitator superfamily||Major facilitator superfamily domain||MFS transporter superfamily	0	38.5578984084916	-8.29302	3.54077870575686e-06	0.000896997272125072
TraesCS6B03G0888700LC	6B:563646484-563647506|+	--	--	0	38.1539	-8.27787	4.27844093612288e-06	0.00104438114798917
TraesCS3D03G0290900	3D:97668973-97670414|-	--	O-methyltransferase domain||Plant methyltransferase dimerisation||O-methyltransferase COMT-type||S-adenosyl-L-methionine-dependent methyltransferase||Winged helix-like DNA-binding domain superfamily||Winged helix DNA-binding domain superfamily	0	38.0321786683329	-8.27327	4.27844093612288e-06	0.00104438114798917
TraesCS5D03G0706700	5D:410826365-410828250|-	--	UDP-glucuronosyl/UDP-glucosyltransferase||UDP-glycosyltransferase family, conserved site	0	38.0321786683329	-8.27327	4.27844093612288e-06	0.00104438114798917
TraesCS6B03G0450100LC	6B:201001787-201002719|-	--	--	0	37.309020325001	-8.24567	5.18874751827668e-06	0.00121310279401883
TraesCS4B03G0055000	4B:20580457-20763769|-	--	--	0	37.248334682251	-8.24333	5.18874751827668e-06	0.00121310279401883
TraesCS2A03G1087600	2A:710996398-710996944|+	--	--	0	36.9757292608792	-8.23276	5.18874751827668e-06	0.00121310279401883
TraesCS6A03G0354400LC	6A:132687018-132689018|+	--	--	0	36.9757292608792	-8.23276	5.18874751827668e-06	0.00121310279401883
TraesCS3A03G1152400	3A:718733768-718735759|-	--	NADPH-dependent FMN reductase-like||Flavoprotein-like superfamily	0	36.8861488740218	-8.22928	5.18874751827668e-06	0.00121310279401883
TraesCS4D03G0053700	4D:15250609-15251283|+	--	Germin||Cupin 1||RmlC-like cupin domain superfamily||RmlC-like jelly roll fold||Germin, manganese binding site	3.78626744620077	1142.2759667343	-8.22238	1.31750614979912e-16	2.69859382527007e-12
TraesCS1D03G0838400LC	1D:443574609-443575100|+	--	--	0	36.0770062508102	-8.19738	6.3167361092064e-06	0.00143204530165404
TraesCS4A03G0657600	4A:560132442-560132966|-	--	--	8.51910175395173	2473.04639697858	-8.19283	2.72940310936304e-18	1.21349262242281e-13
TraesCS4B03G0209000	4B:97785715-97787968|-	--	NB-ARC||P-loop containing nucleoside triphosphate hydrolase||Leucine-rich repeat domain superfamily||Winged helix-like DNA-binding domain superfamily||Apoptotic protease-activating factors, helical domain	0	35.9192798534255	-8.19109	6.3167361092064e-06	0.00143204530165404
TraesCS6A03G0215300	6A:64056876-64061008|+	--	Chlorophyll A-B binding protein, plant and chromista||Chlorophyll A-B binding protein||Chlorophyll a/b binding domain superfamily	0	35.9192798534255	-8.19109	6.3167361092064e-06	0.00143204530165404
TraesCS2B03G1299400LC	2B:720779750-720781423|-	--	--	0	35.3875562369641	-8.16964	6.3167361092064e-06	0.00143204530165404
TraesCS2D03G0612800LC	2D:327378810-327379172|-	--	--	0	35.3232893277595	-8.16703	7.72045524458559e-06	0.00168673926375565
TraesCS6D03G0772300	6D:456443725-456446463|+	--	Dehydrin	4.73283430775096	1363.87618502271	-8.16556	6.83115171405564e-17	1.51856502603457e-12
TraesCS1B03G0390500LC	1B:198693977-198696376|-	--	--	0	35.2155009159632	-8.16264	7.72045524458559e-06	0.00168673926375565
TraesCS2D03G0653400	2D:357271956-357273368|+	--	--	0	35.1586321197904	-8.16031	7.72045524458559e-06	0.00168673926375565
TraesCS2A03G0256400	2A:77912516-77913442|-	--	NADPH-dependent FMN reductase-like||Flavodoxin/nitric oxide synthase||Flavoprotein WrbA-like||Flavoprotein-like superfamily	1.93612973697701	573.63778538387	-8.15266	7.54629649766699e-15	5.16166680440422e-11
TraesCS5B03G1089800	5B:620148986-620149483|+	--	Cysteine-rich secretory protein-related||Venom allergen 5-like||CAP domain||Allergen V5/Tpx-1-related, conserved site||CAP superfamily	0	34.9197795345095	-8.15051	7.72045524458559e-06	0.00168673926375565
TraesCS1D03G0787500	1D:425212355-425213203|-	--	Photosystem II PsbW, class 2	0	34.8628304459718	-8.14817	7.72045524458559e-06	0.00168673926375565
TraesCS5D03G0166200	5D:64446844-64447167|+	--	Ovate protein family, C-terminal||Ovate protein family	0	34.8628304459718	-8.14817	7.72045524458559e-06	0.00168673926375565
TraesCS6D03G0527600	6D:323463046-323463928|-	--	Senescence regulator S40	0	34.8628304459718	-8.14817	7.72045524458559e-06	0.00168673926375565
TraesCSU03G0507300	Un:307717000-307717377|-	--	--	0	34.5505927051969	-8.13523	7.72045524458559e-06	0.00168673926375565
TraesCS4B03G0705000LC	4B:534827920-534828757|+	--	--	0	34.4890021462624	-8.13267	7.72045524458559e-06	0.00168673926375565
TraesCS6D03G0699400LC	6D:429484618-429485685|-	--	--	0	34.4642959190372	-8.13164	7.72045524458559e-06	0.00168673926375565
TraesCS6A03G0150600	6A:38820359-38823792|-	--	Terpene synthase, N-terminal domain||Terpene synthase, metal-binding domain||Terpenoid cyclases/protein prenyltransferase alpha-alpha toroid||Isoprenoid synthase domain superfamily||Terpene cyclase-like 1, C-terminal domain||Terpene synthase, N-terminal domain superfamily	0	34.3301703139425	-8.12603	9.47510416380966e-06	0.00198865364810218
TraesCS5D03G0900400LC	5D:472351810-472353096|-	--	--	0.000448206225445501	34.2309141783767	-8.11675	9.47510416380966e-06	0.00198865364810218
TraesCS2D03G0449700	2D:177613254-177615920|+	--	NAC domain||NAC domain superfamily	0	33.8739795264269	-8.1068	9.47510416380966e-06	0.00198865364810218
TraesCS3D03G1145500	3D:604176101-604176800|-	--	ABA/WDS induced protein	0	33.8063810385181	-8.10393	9.47510416380966e-06	0.00198865364810218
TraesCS5D03G1146500	5D:547204371-547205231|+	--	Leucine-rich repeat||Serralysin-like metalloprotease, C-terminal||Leucine-rich repeat-containing N-terminal, plant-type||Leucine-rich repeat domain superfamily	2.83970058465058	793.393504997722	-8.09626	1.36172338627881e-15	1.21084443507912e-11
TraesCSU03G0543600	Un:333622907-333623284|-	--	--	0	33.2636578822084	-8.08067	1.16786167600443e-05	0.00233537316859777
TraesCS7B03G1122500	7B:693512292-693513242|-	--	Thaumatin family||Thaumatin, conserved site||Osmotin/thaumatin-like superfamily	0.946566861550192	283.128441197589	-8.07727	1.15585860501609e-12	4.40481202105847e-09
TraesCS4D03G0053600	4D:15245717-15246391|+	--	Germin||Cupin 1||RmlC-like cupin domain superfamily||RmlC-like jelly roll fold||Germin, manganese binding site	1.87980902054071	524.367517365805	-8.06307	1.80641251452504e-14	1.1206479124993e-10
TraesCS2D03G1317500LC	2D:650091940-650092260|-	--	--	0	32.7499316310644	-8.0583	1.16786167600443e-05	0.00233537316859777
TraesCS4A03G1096800LC	4A:713599330-713600454|+	--	--	0	32.7499316310644	-8.0583	1.16786167600443e-05	0.00233537316859777
TraesCS6A03G0010200	6A:2510567-2511779|+	--	NTF2-like domain superfamily	0	32.7499316310644	-8.0583	1.16786167600443e-05	0.00233537316859777
TraesCS3A03G0245600LC	3A:80606565-80607210|-	--	--	0.0178715567227481	37.3109069821602	-8.05459	5.18874751827668e-06	0.00121310279401883
TraesCS5A03G1256500LC	5A:696093349-696093552|+	--	--	0	32.4044893166042	-8.04306	1.16786167600443e-05	0.00233537316859777
TraesCS6A03G0960300	6A:602637660-602640013|-	--	Cytochrome P450||Cytochrome P450, E-class, group I||Cytochrome P450, conserved site||Cytochrome P450 superfamily	0	32.2368279845032	-8.0356	1.44592397981502e-05	0.0027849435440827
TraesCS1A03G1020300LC	1A:579473149-579487048|-	--	--	2.69642209263436e-06	32.1635597702949	-8.0323	1.44592397981502e-05	0.0027849435440827
TraesCS1B03G0876900LC	1B:551333296-551333711|+	--	--	0	31.9357735730806	-8.02212	1.44592397981502e-05	0.0027849435440827
TraesCS5A03G1202300	5A:678689606-678691003|+	--	SANT/Myb domain||Homeobox-like domain superfamily||Myb domain	0	31.803280255346	-8.01614	1.44592397981502e-05	0.0027849435440827
TraesCS1A03G0836500LC	1A:529756477-529756938|+	--	--	0	31.6934822236107	-8.01117	1.44592397981502e-05	0.0027849435440827
TraesCS1D03G0027100	1D:7162457-7164005|-	--	NADH:flavin oxidoreductase/NADH oxidase, N-terminal||Aldolase-type TIM barrel	0	31.6934822236107	-8.01117	1.44592397981502e-05	0.0027849435440827
TraesCS1D03G0559200LC	1D:317407354-317407840|-	--	--	0	31.6536473125794	-8.00936	1.44592397981502e-05	0.0027849435440827
TraesCS4A03G0123100LC	4A:58806258-58806893|+	--	--	0	31.2940128795231	-7.99294	1.79858836513575e-05	0.00329527082612372
TraesCS4D03G0086700LC	4D:24400337-24400642|+	--	--	0	30.637032816157	-7.96245	1.79858836513575e-05	0.00329527082612372
TraesCS7A03G1123800	7A:663497056-663498791|-	--	Alpha/beta hydrolase fold-3||Alpha/Beta hydrolase fold||Lipase, GDXG, putative serine active site	0	30.637032816157	-7.96245	1.79858836513575e-05	0.00329527082612372
TraesCS4A03G0645300	4A:553873532-553873909|-	--	--	0	30.5928539017981	-7.96038	1.79858836513575e-05	0.00329527082612372
TraesCS1A03G0713200LC	1A:482207598-482208191|+	--	--	0	30.5774117918107	-7.95966	1.79858836513575e-05	0.00329527082612372
TraesCS5A03G0740300	5A:513368494-513369840|-	--	--	0	30.4373735286037	-7.95306	1.79858836513575e-05	0.00329527082612372
TraesCS6A03G0612000	6A:417589198-417590203|+	--	Senescence regulator S40	0.946566861550192	258.830104826154	-7.94788	2.73982847832218e-12	8.21209713345196e-09
TraesCSU03G0552100LC	Un:340154398-340155006|+	--	--	0	29.7800904841301	-7.92169	2.24823545641969e-05	0.00397969004880237
TraesCS5B03G1252900LC	5B:681153795-681154229|+	--	--	0	29.5805834087033	-7.91203	2.24823545641969e-05	0.00397969004880237
TraesCSU03G0326900LC	Un:233150821-233151431|-	--	--	0	28.9926060055887	-7.88319	2.8247060862709e-05	0.00475706184074259
TraesCS5A03G0137000	5A:51775523-51776623|+	--	--	0	28.8913548552244	-7.87816	2.8247060862709e-05	0.00475706184074259
TraesCS6B03G1076800	6B:664171055-664175325|+	--	Ionotropic glutamate receptor||Solute-binding protein family 3/N-terminal domain of MltF||Receptor, ligand binding region||Ionotropic glutamate receptor, plant||Periplasmic binding protein-like I	0	28.6235155633696	-7.86479	2.8247060862709e-05	0.00475706184074259
TraesCS4A03G0039500	4A:15545246-15548583|+	--	Tetratricopeptide-like helical domain superfamily	2.83970058465058	675.493515717626	-7.86421	6.50481152432416e-15	4.68979330332085e-11
TraesCS6B03G0403500LC	6B:168642639-168643191|+	--	--	0.946566861550192	243.927799702478	-7.86237	4.77741032976287e-12	1.24943331330151e-08
TraesCS2B03G1219800	2B:688823428-688825015|-	--	Leucine-rich repeat||Leucine-rich repeat, typical subtype||Leucine-rich repeat-containing N-terminal, plant-type||Leucine-rich repeat domain superfamily	0	28.5241340012497	-7.85979	2.8247060862709e-05	0.00475706184074259
TraesCS5A03G0975000	5A:602256275-602257841|+	--	NAC domain||NAC domain superfamily	0	28.5241340012497	-7.85979	2.8247060862709e-05	0.00475706184074259
TraesCS5D03G0257500	5D:124335726-124342840|-	--	FAD linked oxidase, N-terminal||D-arabinono-1,4-lactone oxidase||L-gulonolactone oxidase, plant||FAD-binding domain, PCMH-type||FAD-binding, type PCMH, subdomain 2||Vanillyl-alcohol oxidase, C-terminal subdomain 2||FAD-binding, type PCMH-like superfamily	0	28.5241340012497	-7.85979	2.8247060862709e-05	0.00475706184074259
TraesCS5D03G1036600	5D:513910018-513910967|+	--	LURP-one-related||Tubby-like, C-terminal||LURP-one-related superfamily	0	28.5241340012497	-7.85979	2.8247060862709e-05	0.00475706184074259
TraesCS7D03G1097700	7D:580243170-580244835|+	--	Aspartic peptidase domain superfamily||Xylanase inhibitor, C-terminal||Xylanase inhibitor, N-terminal||Peptidase family A1 domain||Pepsin-like domain, plant	0	28.5241340012497	-7.85979	2.8247060862709e-05	0.00475706184074259
TraesCS1A03G0676400	1A:463071935-463072698|+	--	Proteinase inhibitor I12, Bowman-Birk||Bowman-Birk type wound-induced proteinase inhibitor WIP1	39.1584451896757	8790.40757403843	-7.83843	1.62369249364875e-18	8.66272419211482e-14
TraesCS6A03G0990000	6A:610296956-610297880|+	--	--	0	28.0939071029455	-7.83796	3.56804979318428e-05	0.00572691313375354
TraesCS6B03G0733200LC	6B:455916600-455921231|-	--	--	0	27.8838077819874	-7.82718	3.56804979318428e-05	0.00572691313375354
TraesCS4D03G0539100LC	4D:379198701-379200581|+	--	--	0	27.6979822376502	-7.81757	3.56804979318428e-05	0.00572691313375354
TraesCS5B03G1088800	5B:619900425-619901490|-	--	Cysteine-rich secretory protein-related||Venom allergen 5-like||CAP domain||Allergen V5/Tpx-1-related, conserved site||CAP superfamily	0	27.5350360660771	-7.8091	3.56804979318428e-05	0.00572691313375354
TraesCS2B03G0322800	2B:106402358-106404036|-	--	UDP-glucuronosyl/UDP-glucosyltransferase	0	27.467684593796	-7.80558	3.56804979318428e-05	0.00572691313375354
TraesCS3A03G1048700	3A:690922307-690924648|+	--	Multicopper oxidase, type 1||Multicopper oxidase, copper-binding site||Cupredoxin||Multicopper oxidase, type 2||Multicopper oxidase, type 3||Laccase||Multicopper oxidases, conserved site||Laccase, second cupredoxin domain||Laccase, first cupredoxin domain||Laccase, third cupredoxin domain	0	27.467684593796	-7.80558	3.56804979318428e-05	0.00572691313375354
TraesCS3B03G0087700	3B:24071309-24072186|-	--	Proteinase inhibitor I12, Bowman-Birk||Bowman-Birk type proteinase inhibitor	0	27.467684593796	-7.80558	3.56804979318428e-05	0.00572691313375354
TraesCS6B03G1100700	6B:672504967-672508640|+	--	Calcineurin-like phosphoesterase domain, ApaH type||Purple acid phosphatase-like, N-terminal||Purple acid phosphatase, N-terminal||Iron/zinc purple acid phosphatase-like C-terminal domain||Metallo-dependent phosphatase-like||Purple acid phosphatase-like||Purple acid phosphatase, metallophosphatase domain	0	27.467684593796	-7.80558	3.56804979318428e-05	0.00572691313375354
TraesCS7A03G0129700	7A:28837768-28838848|-	--	AP2/ERF domain||DNA-binding domain superfamily||AP2/ERF domain superfamily	0	27.467684593796	-7.80558	3.56804979318428e-05	0.00572691313375354
TraesCS6B03G0291900	6B:117445129-117445425|-	--	--	0	27.3771191879215	-7.80084	4.53238757512601e-05	0.00690102573938707
TraesCS4D03G0053400LC	4D:15239074-15246531|-	--	--	2.85302528721025	648.162822483902	-7.79817	9.76659065837175e-15	6.22276463022067e-11
TraesCS5D03G1230500LC	5D:567846005-567846340|-	--	--	0	27.1632933180764	-7.78958	4.53238757512601e-05	0.00690102573938707
TraesCS2D03G1019400	2D:567104682-567107044|-	--	Protein kinase domain||Legume lectin domain||Serine-threonine/tyrosine-protein kinase, catalytic domain||Serine/threonine-protein kinase, active site||Protein kinase-like domain superfamily||Concanavalin A-like lectin/glucanase domain superfamily||Protein kinase, ATP binding site	0	27.0614693529814	-7.78418	4.53238757512601e-05	0.00690102573938707
TraesCS3A03G0746200	3A:549897911-549898705|-	--	Phytocyanin domain||Cupredoxin||Phytocyanin	0	26.9694621805647	-7.77929	4.53238757512601e-05	0.00690102573938707
TraesCS2D03G0451000	2D:178440644-178441765|+	--	PB1 domain	0	26.9607515037952	-7.77883	4.53238757512601e-05	0.00690102573938707
TraesCS1B03G0878100LC	1B:551366290-551366484|-	--	--	4.28251320170122	940.076756292227	-7.76907	8.93256938845712e-16	8.21673175884421e-12
TraesCS5D03G0057300LC	5D:19137942-19138136|-	--	--	4.28251320170122	940.076756292227	-7.76907	8.93256938845712e-16	8.21673175884421e-12
TraesCSU03G0257300LC	Un:202083546-202083740|+	--	--	4.28251320170122	940.076756292227	-7.76907	8.93256938845712e-16	8.21673175884421e-12
TraesCSU03G0327100LC	Un:233189759-233189953|+	--	--	4.28251320170122	940.076756292227	-7.76907	8.93256938845712e-16	8.21673175884421e-12
TraesCSU03G0485200LC	Un:296448007-296448201|+	--	--	4.28251320170122	940.076756292227	-7.76907	8.93256938845712e-16	8.21673175884421e-12
TraesCSU03G0496400LC	Un:302230726-302230920|+	--	--	4.28251320170122	940.076756292227	-7.76907	8.93256938845712e-16	8.21673175884421e-12
TraesCSU03G0504200LC	Un:306184485-306184679|+	--	--	4.28251320170122	940.076756292227	-7.76907	8.93256938845712e-16	8.21673175884421e-12
TraesCSU03G0513000LC	Un:310730391-310730585|-	--	--	4.28251320170122	940.076756292227	-7.76907	8.93256938845712e-16	8.21673175884421e-12
TraesCS2D03G0785000LC	2D:440767218-440769334|+	--	--	0.0127083119663611	29.4240908174763	-7.76593	2.24823545641969e-05	0.00397969004880237
TraesCS1D03G0640700	1D:364162175-364163067|+	--	Proteinase inhibitor I12, Bowman-Birk||Bowman-Birk type wound-induced proteinase inhibitor WIP1	25.7675840644096	5466.60860687692	-7.75452	4.14544672377064e-18	1.57977052576151e-13
TraesCS2B03G1541400	2B:803558385-803559410|+	--	Plant peroxidase||Haem peroxidase||Haem peroxidase superfamily||Peroxidases heam-ligand binding site||Peroxidase, active site||Secretory peroxidase	0	26.4625248575128	-7.75204	4.53238757512601e-05	0.00690102573938707
TraesCS7A03G0908700	7A:550385277-550386872|-	--	Cytochrome P450||Cytochrome P450, E-class, group IV||Cytochrome P450, conserved site||Cytochrome P450 superfamily	0	26.4230992054917	-7.7499	4.53238757512601e-05	0.00690102573938707
TraesCS4B03G0788800	4B:586029892-586041076|+	--	Carotenoid oxygenase	0	26.4112351863423	-7.74925	5.79138412377211e-05	0.00839117627553383
TraesCS6D03G0074700	6D:16484909-16486554|-	--	Major facilitator superfamily||MFS transporter superfamily	0	26.4112351863423	-7.74925	5.79138412377211e-05	0.00839117627553383
TraesCS7D03G0927600LC	7D:511310949-511312592|+	--	--	0	26.4112351863423	-7.74925	5.79138412377211e-05	0.00839117627553383
TraesCS5D03G0238000	5D:113643455-113648519|+	--	MCM domain||DNA replication licensing factor Mcm7||Nucleic acid-binding, OB-fold||Mini-chromosome maintenance, conserved site||P-loop containing nucleoside triphosphate hydrolase||MCM N-terminal domain||Mini-chromosome maintenance protein||MCM OB domain||MCM, AAA-lid domain	0	26.1833004587704	-7.73681	5.79138412377211e-05	0.00839117627553383
TraesCS4D03G0323000	4D:167331351-167331722|+	--	--	0	26.0872980748521	-7.73153	5.79138412377211e-05	0.00839117627553383
TraesCS5D03G0135600	5D:51915625-51916748|+	--	Germin||Cupin 1||RmlC-like cupin domain superfamily||RmlC-like jelly roll fold||Germin, manganese binding site	15.1450697848031	3145.39360303846	-7.71893	1.81274702029661e-17	6.04460493917904e-13
TraesCS4D03G0734000	4D:479664466-479664834|+	--	AP2/ERF domain||DNA-binding domain superfamily||AP2/ERF domain superfamily	0	25.8507053125032	-7.71845	5.79138412377211e-05	0.00839117627553383
TraesCS4A03G1157300LC	4A:733504811-733506446|+	--	--	0	25.8194694100947	-7.71672	5.79138412377211e-05	0.00839117627553383
TraesCS2B03G0840300	2B:469354878-469357378|+	--	Amino acid/polyamine transporter I||Amino acid permease, conserved site	0	25.6171025045258	-7.70542	5.79138412377211e-05	0.00839117627553383
TraesCS5A03G0505600	5A:395787337-395794502|-	--	Multicopper oxidase, type 1||Multicopper oxidase, copper-binding site||Cupredoxin||Multicopper oxidase, type 2||Multicopper oxidase, type 3||L-ascorbate oxidase, plants||Multicopper oxidases, conserved site||Ascorbate oxidase, third cupredoxin domain	0	25.4822938416606	-7.69784	5.79138412377211e-05	0.00839117627553383
TraesCS1B03G0289600	1B:125704695-125706573|-	--	Transferase||Chloramphenicol acetyltransferase-like domain superfamily	0	25.3547857788886	-7.69064	7.4460653019927e-05	0.0102124029817973
TraesCS1D03G0862500	1D:450906702-450907601|+	--	Late embryogenesis abundant protein, LEA_4 subgroup	0	25.3547857788886	-7.69064	7.4460653019927e-05	0.0102124029817973
TraesCS2A03G0234000	2A:69829100-69830934|-	--	UDP-glucuronosyl/UDP-glucosyltransferase||UDP-glycosyltransferase family, conserved site	0	25.3547857788886	-7.69064	7.4460653019927e-05	0.0102124029817973
TraesCS3A03G0229600	3A:68487516-68488492|+	--	--	0	25.3547857788886	-7.69064	7.4460653019927e-05	0.0102124029817973
TraesCS3D03G0816300	3D:482987142-482993872|-	--	Ulp1 protease family, C-terminal catalytic domain||Papain-like cysteine peptidase superfamily	0	25.3547857788886	-7.69064	7.4460653019927e-05	0.0102124029817973
TraesCS4B03G0192100	4B:88369130-88371682|+	--	Protein of unknown function DUF3615	0	25.3547857788886	-7.69064	7.4460653019927e-05	0.0102124029817973
TraesCS5A03G0267500LC	5A:164737803-164738357|-	--	--	0	25.3547857788886	-7.69064	7.4460653019927e-05	0.0102124029817973
TraesCS5A03G1082800LC	5A:640529593-640531515|-	--	--	0	25.3547857788886	-7.69064	7.4460653019927e-05	0.0102124029817973
TraesCS5A03G1248300LC	5A:693960737-693962161|+	--	--	0	25.3547857788886	-7.69064	7.4460653019927e-05	0.0102124029817973
TraesCS7B03G1184400LC	7B:713429980-713433146|-	--	--	0	25.3547857788886	-7.69064	7.4460653019927e-05	0.0102124029817973
TraesCS7D03G0134600	7D:33734610-33734870|+	--	Late embryogenesis abundant protein, LEA_1 subgroup	0	25.3547857788886	-7.69064	7.4460653019927e-05	0.0102124029817973
TraesCS7D03G0980900LC	7D:536270352-536270722|+	--	--	0	25.3547857788886	-7.69064	7.4460653019927e-05	0.0102124029817973
TraesCSU03G0230800	Un:189312639-189314990|-	--	Glycoside hydrolase, family 32||Glycosyl hydrolase family 32, N-terminal||Glycosyl hydrolase family 32, C-terminal||Concanavalin A-like lectin/glucanase domain superfamily||Glycosyl hydrolase, five-bladed beta-propellor domain superfamily	0	25.3547857788886	-7.69064	7.4460653019927e-05	0.0102124029817973
TraesCSU03G0235500	Un:192067460-192069811|+	--	Glycoside hydrolase, family 32||Glycosyl hydrolase family 32, N-terminal||Glycosyl hydrolase family 32, C-terminal||Concanavalin A-like lectin/glucanase domain superfamily||Glycosyl hydrolase, five-bladed beta-propellor domain superfamily	0	25.3547857788886	-7.69064	7.4460653019927e-05	0.0102124029817973
TraesCS7B03G0918000	7B:602115123-602116175|+	--	Oxoglutarate/iron-dependent dioxygenase||Non-haem dioxygenase N-terminal domain||Isopenicillin N synthase-like superfamily	0	24.664051049077	-7.65099	7.4460653019927e-05	0.0102124029817973
TraesCS4A03G1132700LC	4A:724495285-724495653|+	--	--	0	24.6027694187426	-7.64742	7.4460653019927e-05	0.0102124029817973
TraesCS6A03G0392200	6A:158542125-158543654|+	--	ATPase, F1/V1/A1 complex, alpha/beta subunit, nucleotide-binding domain||ATP synthase, alpha subunit, C-terminal||ATPase, F1/V1/A1 complex, alpha/beta subunit, N-terminal domain||ATP synthase, F1 complex, alpha subunit||ATP synthase subunit alpha, N-terminal domain-like superfamily||P-loop containing nucleoside triphosphate hydrolase||ATP synthase, F1 complex, alpha subunit nucleotide-binding dom…	0	24.326762987973	-7.63122	9.63608450846118e-05	0.0125391312364737
TraesCS2A03G1258900	2A:759239039-759240708|+	--	Granulin||Cysteine peptidase, cysteine active site||Peptidase C1A, papain C-terminal||Cathepsin propeptide inhibitor domain (I29)||Cysteine peptidase, histidine active site||Cysteine peptidase, asparagine active site||Granulin superfamily||Papain-like cysteine peptidase superfamily||Papain-like cysteine endopeptidase	0	24.2983363714349	-7.62954	9.63608450846118e-05	0.0125391312364737
TraesCS4D03G0261300	4D:117950034-117950770|-	--	EF-hand domain||EF-hand domain pair||EF-Hand 1, calcium-binding site	0	24.2983363714349	-7.62954	9.63608450846118e-05	0.0125391312364737
TraesCS6A03G1021700LC	6A:616213932-616215239|-	--	--	0	24.2153260736965	-7.62463	9.63608450846118e-05	0.0125391312364737
TraesCS3A03G1058500LC	3A:693387486-693388046|+	--	--	0	24.1332713819262	-7.61976	9.63608450846118e-05	0.0125391312364737
TraesCS4B03G0972900	4B:660970257-660976557|+	--	Zinc finger, RING-type||Zinc finger, RING/FYVE/PHD-type||RING-type zinc-finger, LisH dimerisation motif||E3 ubiquitin-protein ligase RFWD3	0	24.0600736691507	-7.6154	9.63608450846118e-05	0.0125391312364737
TraesCSU03G0541700	Un:332179308-332179604|+	--	--	0	23.7694669220554	-7.59796	9.63608450846118e-05	0.0125391312364737
TraesCS6A03G0818000	6A:552051653-552053193|+	--	Alpha/beta hydrolase fold-3||Alpha/Beta hydrolase fold	0	23.6994900789468	-7.59373	9.63608450846118e-05	0.0125391312364737
TraesCS4D03G0554900LC	4D:389408223-389408462|+	--	--	0	23.6166957146519	-7.5887	9.63608450846118e-05	0.0125391312364737
TraesCS1A03G0845700	1A:533319899-533320303|+	--	Short-chain dehydrogenase/reductase SDR||NAD(P)-binding domain superfamily	0	23.5141936584113	-7.58246	9.63608450846118e-05	0.0125391312364737
TraesCS5D03G0952300	5D:491620025-491620822|+	--	Glutathione S-transferase, N-terminal||Glutathione S-transferase, C-terminal-like||Thioredoxin-like superfamily||Glutathione S-transferase, C-terminal domain superfamily||Glutathione Transferase family	0	23.2929066034426	-7.56889	0.000125561101170857	0.0154211230885533
TraesCS1D03G0731700	1D:406066946-406068172|-	--	FAD dependent oxidoreductase||FAD/NAD(P)-binding domain superfamily	0	23.2418869639812	-7.56574	0.000125561101170857	0.0154211230885533
TraesCS2D03G0041900	2D:10062398-10064247|+	--	Cytochrome P450||Cytochrome P450, E-class, group IV||Cytochrome P450 superfamily	0	23.2418869639812	-7.56574	0.000125561101170857	0.0154211230885533
TraesCS4A03G0726000	4A:588698579-588702778|+	--	Protein kinase domain||S-locus glycoprotein domain||Serine-threonine/tyrosine-protein kinase, catalytic domain||Bulb-type lectin domain||PAN/Apple domain||Serine/threonine-protein kinase, active site||Protein kinase-like domain superfamily||Protein kinase, ATP binding site||S-receptor-like serine/threonine-protein kinase||Bulb-type lectin domain superfamily	0	23.2418869639812	-7.56574	0.000125561101170857	0.0154211230885533
TraesCS5A03G0412600	5A:328076230-328078065|-	--	--	0	23.2418869639812	-7.56574	0.000125561101170857	0.0154211230885533
TraesCS5A03G0850000LC	5A:557678654-557680646|-	--	--	0	23.2418869639812	-7.56574	0.000125561101170857	0.0154211230885533
TraesCSU03G0490400LC	Un:298799745-298800804|-	--	--	0	23.2387088275323	-7.56555	0.000125561101170857	0.0154211230885533
TraesCS1D03G0862200	1D:450801233-450802571|+	--	Late embryogenesis abundant protein, LEA_4 subgroup	0.958039064855563	199.430597480617	-7.55662	3.13604259924135e-11	6.19682017610092e-08
TraesCS7A03G0175500	7A:43476331-43477649|-	--	F-box domain||F-box associated domain, type 3||F-box associated interaction domain||F-box-like domain superfamily	0	22.7378263510746	-7.53428	0.000125561101170857	0.0154211230885533
TraesCS7B03G0202100	7B:87214409-87217664|+	--	Fungal lipase-like domain||Alpha/Beta hydrolase fold	0	22.7348427645325	-7.53409	0.000125561101170857	0.0154211230885533
TraesCS2A03G0119300	2A:31382911-31385846|-	--	CDC48, N-terminal subdomain||AAA+ ATPase domain||ATPase, AAA-type, core||ATPase, AAA-type, conserved site||CDC48, domain 2||AAA ATPase, CDC48 family||Aspartate decarboxylase-like domain superfamily||P-loop containing nucleoside triphosphate hydrolase||CDC48 domain 2-like superfamily||AAA ATPase, AAA+ lid domain	0	22.7069501416248	-7.53233	0.000125561101170857	0.0154211230885533
TraesCS3A03G0837700	3A:600306343-600310703|+	--	Oxoglutarate/iron-dependent dioxygenase||Non-haem dioxygenase N-terminal domain||Isopenicillin N synthase-like superfamily	0	22.3888276860669	-7.51209	0.00016479894528675	0.0190310678115556
TraesCS6D03G0589300	6D:365532339-365533964|-	--	Transferase||Chloramphenicol acetyltransferase-like domain superfamily	0.946566861550192	190.160893341664	-7.50334	4.78665967303583e-11	8.56972707636938e-08
TraesCS7A03G0890900LC	7A:542813603-542815761|-	--	--	0	22.2525739685717	-7.50333	0.00016479894528675	0.0190310678115556
TraesCS3A03G0550600	3A:393481157-393486196|+	--	Aldehyde dehydrogenase domain||Aldehyde dehydrogenase, cysteine active site||Aldehyde/histidinol dehydrogenase||Aldehyde dehydrogenase, N-terminal||Aldehyde dehydrogenase, C-terminal||Aldehyde dehydrogenase, glutamic acid active site	0	22.2352704836047	-7.50221	0.00016479894528675	0.0190310678115556
TraesCS1B03G1076200LC	1B:636899688-636901621|+	--	--	0	22.2240050729416	-7.50148	0.00016479894528675	0.0190310678115556
TraesCS1B03G0272800LC	1B:117335514-117335810|-	--	--	0	22.2068208332015	-7.50037	0.00016479894528675	0.0190310678115556
TraesCS1D03G0202400LC	1D:75812764-75813193|-	--	--	0	22.1854375565275	-7.49899	0.00016479894528675	0.0190310678115556
TraesCS2A03G0913500	2A:622773229-622782802|+	--	UDP-glucuronosyl/UDP-glucosyltransferase||UDP-glycosyltransferase family, conserved site	0	22.1854375565275	-7.49899	0.00016479894528675	0.0190310678115556
TraesCS2A03G1367900	2A:786351329-786357579|+	--	NB-ARC||P-loop containing nucleoside triphosphate hydrolase||Winged helix-like DNA-binding domain superfamily||Rx, N-terminal||Apoptotic protease-activating factors, helical domain	0	22.1854375565275	-7.49899	0.00016479894528675	0.0190310678115556
TraesCS2B03G0036800	2B:9689277-9694655|+	--	Armadillo-like helical||Armadillo-type fold	0	22.1854375565275	-7.49899	0.00016479894528675	0.0190310678115556
TraesCS2D03G1317400LC	2D:650091428-650091787|-	--	--	0	22.1854375565275	-7.49899	0.00016479894528675	0.0190310678115556
TraesCS6B03G0105200	6B:30911896-30913416|-	--	Major facilitator superfamily||MFS transporter superfamily	0	22.1854375565275	-7.49899	0.00016479894528675	0.0190310678115556
TraesCS7A03G0474100	7A:168713885-168714310|+	--	--	0	22.1854375565275	-7.49899	0.00016479894528675	0.0190310678115556
TraesCS7D03G0721500LC	7D:384102272-384102712|-	--	--	4.61201300045906e-07	22.1854375565275	-7.49899	0.00016479894528675	0.0190310678115556
TraesCS2B03G0730600LC	2B:399242169-399244370|+	--	--	0.000619858945922064	21.9735086139435	-7.47815	0.00016479894528675	0.0190310678115556
TraesCS1B03G0660400	1B:417919782-417922866|+	--	Protein kinase domain||Serine/threonine-protein kinase, active site||Protein kinase-like domain superfamily||Protein kinase, ATP binding site	0	21.849517334407	-7.4771	0.00016479894528675	0.0190310678115556
TraesCS7D03G0452000	7D:163123093-163123341|-	--	--	0	21.8034968472186	-7.47408	0.00016479894528675	0.0190310678115556
TraesCS5B03G0034800	5B:15060069-15060977|-	--	Thaumatin family||Thaumatin, conserved site||Osmotin/thaumatin-like superfamily	8.51910175395173	1492.59326651296	-7.46441	3.95860259732669e-16	5.86664904923816e-12
TraesCS1A03G0001300	1A:169592-169969|-	--	--	0	21.3619741944905	-7.44473	0.000217959895379251	0.0235874165076547
TraesCS5D03G0393400LC	5D:252880688-252881038|-	--	--	0	21.203501291718	-7.43405	0.000217959895379251	0.0235874165076547
TraesCS3A03G1091400LC	3A:701243697-701244937|-	--	--	0	21.1894313031418	-7.4331	0.000217959895379251	0.0235874165076547
TraesCS6B03G1147100	6B:690094598-690099654|+	--	Alcohol dehydrogenase, zinc-type, conserved site||GroES-like superfamily||Alcohol dehydrogenase, C-terminal||Alcohol dehydrogenase, N-terminal||Polyketide synthase, enoylreductase domain||NAD(P)-binding domain superfamily	0	21.1438123454961	-7.43001	0.000217959895379251	0.0235874165076547
TraesCS1A03G0488000LC	1A:328771547-328772417|-	--	--	0	21.1289881490738	-7.429	0.000217959895379251	0.0235874165076547
TraesCS1D03G0185500	1D:66545403-66546783|+	--	Plant peroxidase||Haem peroxidase||Haem peroxidase superfamily||Peroxidases heam-ligand binding site||Peroxidase, active site||Secretory peroxidase	0	21.1289881490738	-7.429	0.000217959895379251	0.0235874165076547
TraesCS3A03G0839100	3A:600729016-600730438|-	--	Adaptor protein ClpS, core||Ribosomal protein L7/L12, C-terminal/adaptor protein ClpS-like	0	21.1289881490738	-7.429	0.000217959895379251	0.0235874165076547
TraesCS3A03G0950800	3A:650631169-650635156|-	--	Oxoglutarate/iron-dependent dioxygenase||Non-haem dioxygenase N-terminal domain||Isopenicillin N synthase-like superfamily	0	21.1289881490738	-7.429	0.000217959895379251	0.0235874165076547
TraesCS3B03G0098300	3B:27856523-27857855|-	--	Aspartic peptidase A1 family||Aspartic peptidase domain superfamily||Xylanase inhibitor, C-terminal||Xylanase inhibitor, N-terminal	0	21.1289881490738	-7.429	0.000217959895379251	0.0235874165076547
TraesCS6A03G0131400	6A:33507997-33510840|-	--	Multicopper oxidase, type 1||Multicopper oxidase, copper-binding site||Cupredoxin||Multicopper oxidase, type 2||Multicopper oxidase, type 3||Multicopper oxidases, conserved site||Laccase, second cupredoxin domain||Laccase, first cupredoxin domain||Laccase, third cupredoxin domain	0	21.1289881490738	-7.429	0.000217959895379251	0.0235874165076547
TraesCS6A03G0848300LC	6A:563634843-563635292|+	--	--	0	21.1289881490738	-7.429	0.000217959895379251	0.0235874165076547
TraesCS7A03G0080000LC	7A:17459017-17465738|+	--	--	0	21.1289881490738	-7.429	0.000217959895379251	0.0235874165076547
TraesCS7D03G0116400	7D:28748183-28748857|-	--	AP2/ERF domain||DNA-binding domain superfamily||AP2/ERF domain superfamily	0	21.1289881490738	-7.429	0.000217959895379251	0.0235874165076547
TraesCS5B03G1063300LC	5B:610662015-610665019|+	--	--	0	21.1284816414905	-7.42897	0.000217959895379251	0.0235874165076547
TraesCS7B03G1041400LC	7B:659238979-659239518|+	--	--	0	21.0004312061828	-7.42025	0.000217959895379251	0.0235874165076547
TraesCS7A03G1309200	7A:720619770-720621646|-	--	Alpha carbonic anhydrase domain||Carbonic anhydrase, alpha-class, conserved site||Carbonic anhydrase, alpha-class||Alpha carbonic anhydrase domain superfamily||Carbonic anhydrase, prokaryotic-like	1.89313372310038	331.725113940459	-7.39313	1.46549829052435e-12	5.14389899974045e-09
TraesCS4D03G0051500	4D:14847617-14848291|-	--	Germin||Cupin 1||RmlC-like cupin domain superfamily||RmlC-like jelly roll fold||Germin, manganese binding site	1.89313372310038	330.818337910485	-7.38918	1.5076415070118e-12	5.22309673260349e-09
TraesCS4B03G0647100	4B:494268641-494269728|+	--	Globin||Leghaemoglobin||Globin-like superfamily||Globin/Protoglobin||Leghaemoglobin, iron-binding site	1.89313372310038	329.612215125552	-7.38392	1.55112162825664e-12	5.23768614624989e-09
TraesCS1A03G0005100LC	1A:1227205-1227717|-	--	--	0	20.1361	-7.35997	0.000290613193839001	0.0293540233201409
TraesCS1A03G0988500LC	1A:570644450-570646731|+	--	--	0	20.0725387416201	-7.35544	0.000290613193839001	0.0293540233201409
TraesCS1D03G0067700LC	1D:17151294-17151994|+	--	--	0	20.0725387416201	-7.35544	0.000290613193839001	0.0293540233201409
TraesCS1D03G0383000LC	1D:209854751-209856268|+	--	--	0	20.0725387416201	-7.35544	0.000290613193839001	0.0293540233201409
TraesCS2A03G0086000	2A:21039682-21042566|+	--	Cytochrome P450||Cytochrome P450, E-class, group I||Cytochrome P450, conserved site||Cytochrome P450 superfamily	0	20.0725387416201	-7.35544	0.000290613193839001	0.0293540233201409
TraesCS2D03G1308300	2D:648096792-648097367|-	--	--	0	20.0725387416201	-7.35544	0.000290613193839001	0.0293540233201409
TraesCS3A03G0238600	3A:75919304-75921740|+	--	Oxygen oxidoreductase covalent FAD-binding site||FAD linked oxidase, N-terminal||Cytokinin dehydrogenase 1, FAD/cytokinin binding domain||FAD-linked oxidase-like, C-terminal||FAD-binding domain, PCMH-type||FAD-binding, type PCMH, subdomain 1||FAD-binding, type PCMH, subdomain 2||Cytokinin dehydrogenase, C-terminal domain superfamily||FAD-binding, type PCMH-like superfamily	0	20.0725387416201	-7.35544	0.000290613193839001	0.0293540233201409
TraesCS3A03G1041300	3A:688707250-688708755|+	--	Aspartic peptidase A1 family||Aspartic peptidase domain superfamily||Xylanase inhibitor, C-terminal||Xylanase inhibitor, N-terminal||Peptidase family A1 domain	0	20.0725387416201	-7.35544	0.000290613193839001	0.0293540233201409
TraesCS3D03G0287100LC	3D:94897719-94898024|-	--	--	0	20.0725387416201	-7.35544	0.000290613193839001	0.0293540233201409
TraesCS5A03G0612000	5A:458734119-458735237|+	--	Oil body-associated protein-like	0	20.0725387416201	-7.35544	0.000290613193839001	0.0293540233201409
TraesCS5A03G1293800LC	5A:709655212-709656771|+	--	--	0	20.0725387416201	-7.35544	0.000290613193839001	0.0293540233201409
TraesCS5B03G0155400LC	5B:71569364-71569792|-	--	--	0	20.0725387416201	-7.35544	0.000290613193839001	0.0293540233201409
TraesCS7D03G0294000	7D:85054248-85054490|+	--	--	0	20.0725387416201	-7.35544	0.000290613193839001	0.0293540233201409
TraesCSU03G0288700LC	Un:217613759-217614055|+	--	--	0	20.0458923238955	-7.35354	0.000290613193839001	0.0293540233201409
TraesCS1D03G0977700LC	1D:481377604-481381093|-	--	--	0	19.7038782777367	-7.32886	0.000290613193839001	0.0293540233201409
TraesCS6A03G0054900LC	6A:13809321-13809707|-	--	--	3.05215448713391e-07	19.6042014672343	-7.32159	0.000290613193839001	0.0293540233201409
TraesCS4B03G0140200	4B:60390516-60390852|-	--	--	6.62596803085134	1054.57011574755	-7.31986	2.23752066147897e-15	1.92542261824558e-11
TraesCS1A03G1058100LC	1A:589975214-589976086|-	--	--	0	19.5595768635923	-7.31832	0.000290613193839001	0.0293540233201409
TraesCS7B03G1258100LC	7B:735265758-735266936|-	--	--	0	19.5167118734736	-7.31518	0.000290613193839001	0.0293540233201409
TraesCS6B03G0979700	6B:620653192-620654984|-	--	UDP-glucuronosyl/UDP-glucosyltransferase	0.948140928818202	165.862556970229	-7.30413	1.71834169499445e-10	2.38075886442459e-07
TraesCS2A03G0893500	2A:614421179-614440111|+	--	Myc-type, basic helix-loop-helix (bHLH) domain||Helix-loop-helix DNA-binding domain superfamily	0	19.318248840444	-7.30053	0.00039082463999038	0.0365280505507327
TraesCS6A03G0808400	6A:547549814-547555553|+	--	Xanthine/uracil/vitamin C permease	0	19.2261	-7.29367	0.00039082463999038	0.0365280505507327
TraesCS3B03G1322000LC	3B:787429645-787430052|-	--	--	0	19.2191627693059	-7.29316	0.00039082463999038	0.0365280505507327
TraesCS7A03G0311400	7A:88745669-88746712|-	--	Glutathione S-transferase, N-terminal||Glutathione S-transferase, C-terminal-like||Thioredoxin-like superfamily||Glutathione S-transferase, C-terminal domain superfamily||Glutathione Transferase family	0	19.1924326075686	-7.29116	0.00039082463999038	0.0365280505507327
TraesCS4D03G0796400	4D:499123389-499125500|+	--	Aerolysin||Agglutinin domain||Agglutinin domain superfamily	0	19.1786386149317	-7.29013	0.00039082463999038	0.0365280505507327
TraesCSU03G0516500	Un:313185615-313185911|+	--	--	0	19.1087267725645	-7.28489	0.00039082463999038	0.0365280505507327
TraesCS2A03G0786600LC	2A:547029717-547029833|+	--	--	0	19.1066620327983	-7.28474	0.00039082463999038	0.0365280505507327
TraesCS4B03G0289300LC	4B:154601544-154601660|+	--	--	0	19.1066620327983	-7.28474	0.00039082463999038	0.0365280505507327
TraesCS7A03G1098100LC	7A:650811776-650811892|-	--	--	0	19.1066620327983	-7.28474	0.00039082463999038	0.0365280505507327
TraesCSU03G0437300LC	Un:274278198-274278314|-	--	--	0	19.1066620327983	-7.28474	0.00039082463999038	0.0365280505507327
TraesCS4A03G0540500	4A:491078330-491081236|-	--	Alcohol dehydrogenase, zinc-type, conserved site||GroES-like superfamily||Alcohol dehydrogenase, C-terminal||Alcohol dehydrogenase, N-terminal||NAD(P)-binding domain superfamily	0	19.029109951243	-7.27891	0.00039082463999038	0.0365280505507327
TraesCS1A03G0114600	1A:31418786-31419621|+	--	--	0	19.0160893341664	-7.27793	0.00039082463999038	0.0365280505507327
TraesCS1A03G0118300	1A:32898473-32899641|-	--	BURP domain	0	19.0160893341664	-7.27793	0.00039082463999038	0.0365280505507327
TraesCS1A03G0626300	1A:431332461-431333363|+	--	SAWADEE domain	0	19.0160893341664	-7.27793	0.00039082463999038	0.0365280505507327
TraesCS2B03G1349600	2B:742106151-742110580|-	--	Protein kinase domain||Serine-threonine/tyrosine-protein kinase, catalytic domain||Serine/threonine-protein kinase, active site||Protein kinase-like domain superfamily||Protein kinase, ATP binding site	0	19.0160893341664	-7.27793	0.00039082463999038	0.0365280505507327
TraesCS3A03G0846400	3A:604202949-604203885|-	--	Zinc finger C2H2-type||Zinc finger C2H2 superfamily	0	19.0160893341664	-7.27793	0.00039082463999038	0.0365280505507327
TraesCS3D03G0021300	3D:4033298-4034189|+	--	Germin||Cupin 1||RmlC-like cupin domain superfamily||RmlC-like jelly roll fold||Germin, manganese binding site	0	19.0160893341664	-7.27793	0.00039082463999038	0.0365280505507327
TraesCS4A03G1006600	4A:680318830-680321393|-	--	--	0	19.0160893341664	-7.27793	0.00039082463999038	0.0365280505507327
TraesCS4B03G0797100	4B:592105863-592106551|-	--	--	0	19.0160893341664	-7.27793	0.00039082463999038	0.0365280505507327
TraesCS7A03G1246100	7A:705108709-705111282|+	--	NB-ARC||P-loop containing nucleoside triphosphate hydrolase||Leucine-rich repeat domain superfamily||Winged helix-like DNA-binding domain superfamily	0	19.0160893341664	-7.27793	0.00039082463999038	0.0365280505507327
TraesCS7D03G0504500LC	7D:188682117-188682821|+	--	--	0	19.0160893341664	-7.27793	0.00039082463999038	0.0365280505507327
TraesCS2B03G1565100	2B:810116474-810118794|-	--	Zinc finger, CCHC-type||Zinc finger, CCHC-type superfamily	0	18.9923247735162	-7.27614	0.00039082463999038	0.0365280505507327
TraesCS1A03G0000400	1A:70239-89245|+	--	--	93.5632465663244	14144.5686868942	-7.27075	3.50676920501772e-17	1.03940639236725e-12
TraesCS6D03G0657600	6D:405761917-405763176|+	--	--	0	18.8972588002349	-7.26894	0.00039082463999038	0.0365280505507327
TraesCS1D03G0450800	1D:251969268-251970972|+	--	Major intrinsic protein||Major intrinsic protein, conserved site||Aquaporin-like||Aquaporin transporter	0	18.8740484805297	-7.26718	0.00039082463999038	0.0365280505507327
TraesCS4B03G0055800LC	4B:21493094-21494787|-	--	--	0	18.7479659479854	-7.25758	0.00039082463999038	0.0365280505507327
TraesCS4B03G0073900	4B:27499674-27500060|+	--	Germin||Cupin 1||RmlC-like cupin domain superfamily||RmlC-like jelly roll fold||Germin, manganese binding site	0	18.3443104802072	-7.22638	0.000530404868558373	0.0459580948785818
TraesCS1B03G0225900	1B:86500048-86500344|-	--	--	0	18.2798363940244	-7.22134	0.000530404868558373	0.0459580948785818
TraesCS7B03G1242300	7B:728614385-728632238|+	--	Major sperm protein (MSP) domain||Protein kinase domain||WD40 repeat||Serine/threonine-protein kinase, active site||PapD-like superfamily||Protein kinase-like domain superfamily||Immunoglobulin-like fold||WD40/YVTN repeat-like-containing domain superfamily||Protein kinase, ATP binding site||WD40-repeat-containing domain superfamily||WD40 repeat, conserved site||G-protein beta WD-40 repeat	0	18.252230173065	-7.21917	0.000530404868558373	0.0459580948785818
TraesCS2D03G0850700	2D:478210478-478211836|+	--	GRAM domain||PH-like domain superfamily||GEM-like protein	0	18.2127603279806	-7.21607	0.000530404868558373	0.0459580948785818
TraesCS3B03G1317800	3B:786275074-786276516|-	--	Glycoside hydrolase family 17||Glycoside hydrolase superfamily	5.67940116930115	838.820829518231	-7.20759	7.95235095873286e-15	5.30342285437895e-11
TraesCS4A03G0151200LC	4A:73786409-73786612|-	--	--	0	18.0655945771117	-7.20444	0.000530404868558373	0.0459580948785818
TraesCS5A03G0096700LC	5A:36831690-36831893|-	--	--	0	18.0655945771117	-7.20444	0.000530404868558373	0.0459580948785818
TraesCS6A03G1021500LC	6A:616140335-616148353|-	--	--	0	18.0426502244512	-7.20262	0.000530404868558373	0.0459580948785818
TraesCS2B03G1538800	2B:803245386-803246976|-	--	Plant peroxidase||Haem peroxidase||Haem peroxidase superfamily||Peroxidases heam-ligand binding site||Peroxidase, active site||Secretory peroxidase	0	17.9596399267127	-7.19601	0.000530404868558373	0.0459580948785818
TraesCS2D03G1156700	2D:611498007-611499886|-	--	Pyridoxal phosphate-dependent decarboxylase||Aromatic-L-amino-acid decarboxylase||Pyridoxal phosphate-dependent transferase, major domain||Pyridoxal phosphate-dependent transferase, small domain||Pyridoxal phosphate-dependent transferase||Pyridoxal-phosphate binding site	0	17.9596399267127	-7.19601	0.000530404868558373	0.0459580948785818
TraesCS3A03G0753500	3A:552744181-552744618|-	--	EF-hand domain||EF-hand domain pair||EF-Hand 1, calcium-binding site	0	17.9596399267127	-7.19601	0.000530404868558373	0.0459580948785818
TraesCS3B03G0439000LC	3B:205933083-205933583|-	--	--	0	17.9596399267127	-7.19601	0.000530404868558373	0.0459580948785818
TraesCS6A03G0528500LC	6A:312432770-312435087|-	--	--	0	17.9596399267127	-7.19601	0.000530404868558373	0.0459580948785818
TraesCS7A03G0128000	7A:28413301-28418925|-	--	Transferase||Chloramphenicol acetyltransferase-like domain superfamily	0	17.9596399267127	-7.19601	0.000530404868558373	0.0459580948785818
TraesCS7A03G1137000	7A:669023575-669024220|+	--	Small auxin-up RNA	0	17.9596399267127	-7.19601	0.000530404868558373	0.0459580948785818
TraesCS7A03G1176600	7A:680868639-680871960|-	--	--	0	17.9596399267127	-7.19601	0.000530404868558373	0.0459580948785818
TraesCS7B03G0978600	7B:631543389-631546851|+	--	Leucine-rich repeat||Leucine-rich repeat, typical subtype||Leucine-rich repeat-containing N-terminal, plant-type||Leucine-rich repeat domain superfamily	0	17.9596399267127	-7.19601	0.000530404868558373	0.0459580948785818
TraesCS7D03G0396700LC	7D:129729218-129736938|-	--	--	0	17.9596399267127	-7.19601	0.000530404868558373	0.0459580948785818
TraesCSU03G0056900LC	Un:31247313-31248783|+	--	--	0	17.9596399267127	-7.19601	0.000530404868558373	0.0459580948785818
TraesCS4A03G0474900	4A:440895030-440896312|-	--	Glycoside hydrolase family 18, catalytic domain||Glycoside hydrolase superfamily	1.89313372310038	289.305389789271	-7.19581	5.36700078073038e-12	1.39000109540547e-08
TraesCS5D03G0021400	5D:4960287-4960754|+	--	Photosynthetic reaction centre, L/M||Photosystem II protein D1/D2 superfamily	0	17.9110278027183	-7.19213	0.000530404868558373	0.0459580948785818
TraesCS3A03G0123500LC	3A:35435624-35435755|-	--	--	0	17.8072638187569	-7.1838	0.000530404868558373	0.0459580948785818
TraesCS1B03G0132800	1B:43957053-43961258|-	--	Multicopper oxidase, type 1||Multicopper oxidase, copper-binding site||Cupredoxin||Multicopper oxidase, type 2||Multicopper oxidase, type 3||Laccase||Laccase, second cupredoxin domain||Laccase, first cupredoxin domain||Laccase, third cupredoxin domain	0.946566861550192	152.128714673332	-7.18165	3.58471995726835e-10	4.48948307887748e-07
TraesCS4A03G0494100	4A:455591722-455592378|+	--	Germin||Cupin 1||RmlC-like cupin domain superfamily||RmlC-like jelly roll fold||Germin, manganese binding site	5.67940116930115	821.422050604171	-7.17735	9.79742519377973e-15	6.22276463022067e-11
TraesCS6D03G0636300	6D:393789476-393790806|+	--	Protein of unknown function PDDEXK-like	1.89313372310038	285.238758713123	-7.1754	6.11071311017792e-12	1.52345217688884e-08
TraesCSU03G0023800LC	Un:19683841-19684988|-	--	--	0	17.7025918215031	-7.17536	0.000530404868558373	0.0459580948785818
TraesCS5A03G1037300	5A:622876005-622876787|+	--	Cysteine-rich secretory protein-related||Venom allergen 5-like||CAP domain||Allergen V5/Tpx-1-related, conserved site||CAP superfamily	34.0764070158069	4831.62659465136	-7.17489	1.83654494565882e-16	3.06197956064967e-12
TraesCSU03G0516000	Un:312982415-312982711|+	--	--	0	17.5654061568896	-7.16421	0.000530404868558373	0.0459580948785818
TraesCS7B03G0529200LC	7B:325425593-325426045|-	--	--	0	17.5190714701069	-7.16043	0.000530404868558373	0.0459580948785818
TraesCS1A03G0000200	1A:40098-70338|-	--	--	319.959457972423	44508.6967209099	-7.15208	5.59948010481345e-17	1.35792482978185e-12
TraesCS4D03G0575700	4D:400715020-400716108|+	--	Globin||Leghaemoglobin||Globin-like superfamily||Globin/Protoglobin||Leghaemoglobin, iron-binding site	0.946566861550192	148.95936645097	-7.1513	4.54603021948437e-10	5.36592487322854e-07
TraesCS2D03G0080400	2D:16293087-16294176|+	--	Glutathione S-transferase, N-terminal||Glutathione S-transferase, C-terminal||Glutathione S-transferase, C-terminal-like||Glutathione S-transferases Phi, C-terminal||Thioredoxin-like superfamily||Glutathione S-transferase, C-terminal domain superfamily||Glutathione Transferase family	7.57253489240153	1068.07035093568	-7.14894	4.70514911917736e-15	3.54688599628824e-11
TraesCSU03G0261100	Un:204452666-204453723|+	--	Ribosome-inactivating protein||Ribosome-inactivating protein, subdomain 1||Ribosome-inactivating protein, subdomain 2||Ribosome-inactivating protein superfamily	0.473283430775096	81.3466043739342	-7.11913	9.61642697096576e-09	6.69785393935986e-06
TraesCS2B03G0351900	2B:119638249-119639291|-	--	NADPH-dependent FMN reductase-like||Flavodoxin/nitric oxide synthase||Flavoprotein WrbA-like||Flavoprotein-like superfamily	1.92860815473036	278.494378501671	-7.11577	7.70045971173695e-12	1.85060777720986e-08
TraesCS5A03G1250800	5A:694322861-694323292|-	--	Bifunctional inhibitor/plant lipid transfer protein/seed storage helical domain||Hydrophobic seed protein domain||Bifunctional inhibitor/plant lipid transfer protein/seed storage helical domain superfamily	4.73283430775096	609.57130810078	-7.00388	1.75526614178604e-13	8.83461879212912e-10
TraesCS2A03G1144800	2A:727475204-727476703|+	--	Transferase||Chloramphenicol acetyltransferase-like domain superfamily	4.78048419928224	594.044648392713	-6.95258	2.26119992406769e-13	1.09672307589872e-09
TraesCS3A03G0092900	3A:25308692-25309532|-	--	Proteinase inhibitor I12, Bowman-Birk||Bowman-Birk type proteinase inhibitor	0.946566861550192	128.88682770935	-6.94267	1.63613120709558e-09	1.62856104777916e-06
TraesCS4D03G0053300	4D:15234965-15235636|-	--	Germin||Cupin 1||RmlC-like cupin domain superfamily||RmlC-like jelly roll fold||Germin, manganese binding site	15.1450697848031	1835.22024668269	-6.94168	3.61394239279529e-15	2.99372661684862e-11
TraesCS4A03G0657700	4A:560138749-560139348|-	--	--	3.78626744620077	466.573244277241	-6.93087	7.77760666954171e-13	3.09664829129395e-09
TraesCS3D03G0070600	3D:14982921-14984271|+	--	Aspartic peptidase A1 family||Aspartic peptidase domain superfamily||Xylanase inhibitor, C-terminal||Xylanase inhibitor, N-terminal	0.946566861550192	126.773928894443	-6.91885	1.87742230968763e-09	1.82576827501272e-06
TraesCS4A03G0812600	4A:612401995-612403260|-	--	AP2/ERF domain||DNA-binding domain superfamily||AP2/ERF domain superfamily	0.946566861550192	126.773928894443	-6.91885	1.87742230968763e-09	1.82576827501272e-06
TraesCS7B03G0213800	7B:92287256-92288937|-	--	NADH:flavin oxidoreductase/NADH oxidase, N-terminal||Aldolase-type TIM barrel	2.83970058465058	334.296570649733	-6.84966	5.54088412356665e-12	1.42123677769484e-08
TraesCS6D03G0134800LC	6D:41426941-41428632|-	--	--	8.69628281258329	976.193661823815	-6.82262	2.49953634289564e-14	1.48172514406853e-10
TraesCS3B03G0170400	3B:55409049-55411467|+	--	Cytochrome P450||Cytochrome P450, E-class, group I||Cytochrome P450, conserved site||Cytochrome P450 superfamily	2.17499497483632	254.11272516098	-6.82027	1.77663413360724e-11	3.7399677077262e-08
TraesCS6A03G0779700	6A:532650135-532653884|+	--	CALMODULIN-BINDING PROTEIN60	0.946566861550192	118.311767730245	-6.81928	3.57326072141904e-09	3.11504258184883e-06
TraesCS4B03G0978300	4B:662576785-662577900|-	--	Heat shock factor (HSF)-type, DNA-binding||Heat shock transcription factor family||Winged helix-like DNA-binding domain superfamily||Winged helix DNA-binding domain superfamily	0.946566861550192	112.374386893807	-6.74508	5.62229926733168e-09	4.42420221992153e-06
TraesCS2A03G1175300	2A:737494773-737495102|+	--	--	0.946566861550192	110.927187782638	-6.7264	6.07584585750166e-09	4.72534297652229e-06
TraesCS7A03G1383500	7A:743550586-743551212|-	--	Protein kinase domain||Serine/threonine-protein kinase, active site||Protein kinase-like domain superfamily	0.232836867152017	35.4197973966925	-6.66211	6.3167361092064e-06	0.00143204530165404
TraesCS2B03G1138000	2B:648202958-648203845|-	--	--	1.89313372310038	196.499589786387	-6.63804	1.98273104957127e-10	2.6712794686042e-07
TraesCS1D03G0686100	1D:386328696-386330038|-	--	Conserved hypothetical protein CHP01589, plant	5.1253693629612	497.276542355309	-6.59812	1.22564626604389e-12	4.58797373707475e-09
TraesCS5B03G0419500	5B:285359840-285362260|-	--	Oxoglutarate/iron-dependent dioxygenase||Non-haem dioxygenase N-terminal domain||Isopenicillin N synthase-like superfamily	3.09713162176884	302.103206362247	-6.58355	1.45693806013082e-11	3.15977883675202e-08
TraesCS7D03G0109800	7D:26468110-26468394|+	--	Late embryogenesis abundant protein, LEA_1 subgroup	0.946566861550192	95.5783167214248	-6.5118	2.29911739836869e-08	1.43970083847144e-05
TraesCS5A03G1012300	5A:614706476-614718217|-	--	Aldehyde oxidase/xanthine dehydrogenase, a/b hammerhead||2Fe-2S ferredoxin-type iron-sulfur binding domain||Molybdopterin dehydrogenase, FAD-binding||[2Fe-2S]-binding||CO dehydrogenase flavoprotein, C-terminal||2Fe-2S ferredoxin, iron-sulphur binding site||Aldehyde oxidase/xanthine dehydrogenase, molybdopterin binding||Beta-grasp domain superfamily||FAD-binding domain, PCMH-type||FAD-binding, typ…	15.1463496463004	1359.23538404241	-6.50844	6.76438272498439e-14	3.75930569941008e-10
TraesCS2A03G0950600	2A:650224130-650226202|+	--	Oxoglutarate/iron-dependent dioxygenase||Non-haem dioxygenase N-terminal domain||Isopenicillin N synthase-like superfamily	9.46566861550192	852.068822525514	-6.50582	1.94213716213399e-13	9.59415758094189e-10
TraesCS3D03G1109600	3D:593639878-593640108|-	--	--	0.946566861550192	94.0239972633785	-6.48818	2.51401100543874e-08	1.55600365617364e-05
TraesCS7D03G0994900	7D:542447643-542458431|+	--	Sugar transporter, conserved site||Major facilitator superfamily||MFS transporter superfamily	7.57253489240153	671.466521851983	-6.47941	4.21752309526325e-13	1.81462332402004e-09
TraesCS2D03G0926600	2D:526297729-526300550|+	--	Peptidase S10, serine carboxypeptidase||Alpha/Beta hydrolase fold||Serine carboxypeptidases, histidine active site	0.946566861550192	90.0583966642104	-6.42609	3.62368432322517e-08	2.074364871381e-05
TraesCS4B03G0073200	4B:27443435-27444109|-	--	Germin||Cupin 1||RmlC-like cupin domain superfamily||RmlC-like jelly roll fold||Germin, manganese binding site	6.62596803085134	563.137562780548	-6.41491	9.73194021613487e-13	3.76245271312484e-09
TraesCS6A03G0900700	6A:585179599-585180900|+	--	Dehydrin||Dehydrin, conserved site	2.83970058465058	246.15271193671	-6.40828	9.64659542353571e-11	1.55682852930487e-07
TraesCS5A03G0691600LC	5A:491559127-491559435|-	--	--	3.78626744620077	309.368720336125	-6.33829	3.78262293425395e-11	7.20779008830489e-08
TraesCS1D03G0403300LC	1D:221576394-221576789|+	--	--	6.65530583111528	535.33195877572	-6.33562	1.5763980362006e-12	5.25649925171091e-09
TraesCS7A03G1349300LC	7A:733409729-733410159|-	--	--	0.946566861550192	84.5159525962953	-6.33458	6.43807014377865e-08	3.36748939520469e-05
TraesCS5A03G1271000	5A:701951725-701952790|-	--	Germin||Cupin 1||RmlC-like cupin domain superfamily||RmlC-like jelly roll fold||Germin, manganese binding site	2.89086997451511	237.437025467676	-6.33162	1.35542323818621e-10	2.01995923474052e-07
TraesCS2B03G0322900	2B:106408995-106410718|+	--	UDP-glucuronosyl/UDP-glucosyltransferase||UDP-glycosyltransferase family, conserved site	0.946566861550192	83.9888231561827	-6.32557	6.43807014377865e-08	3.36748939520469e-05
TraesCS5D03G1140800	5D:546426377-546428283|-	--	NADP-dependent oxidoreductase domain||NADP-dependent oxidoreductase domain superfamily	0.946566861550192	83.0963160069735	-6.31018	7.10862774480722e-08	3.66788691915817e-05
TraesCS1A03G0676300	1A:463066479-463067200|+	--	Proteinase inhibitor I12, Bowman-Birk||Bowman-Birk type wound-induced proteinase inhibitor WIP1	5.67940116930115	448.990998167819	-6.3061	3.25355397350768e-12	9.23317082949902e-09
TraesCS2D03G0229700	2D:62566155-62567857|-	--	Plant peroxidase||Haem peroxidase||Haem peroxidase superfamily||Peroxidases heam-ligand binding site||Peroxidase, active site||Secretory peroxidase	0.946566861550192	82.4030537813879	-6.29811	7.85680207005344e-08	4.00741973271024e-05
TraesCS7D03G0396500	7D:129698496-129699698|-	--	NADH:flavin oxidoreductase/NADH oxidase, N-terminal||Aldolase-type TIM barrel	0.946566861550192	81.3466043739342	-6.27952	8.69249575218671e-08	4.36687413720024e-05
TraesCS2B03G1564600LC	2B:810022231-810023094|-	--	--	1.89313372310038	153.023239167265	-6.27752	1.92746669347638e-09	1.84290686434322e-06
TraesCSU03G0305100	Un:223970763-223972803|+	--	Cytochrome P450||Cytochrome P450, E-class, group I||Cytochrome P450, conserved site||Cytochrome P450 superfamily	0.946566861550192	80.1695871380516	-6.25853	9.62699447313163e-08	4.7291315995039e-05
TraesCS7B03G1306200LC	7B:754435017-754435379|+	--	--	1.89313372310038	148.95936645097	-6.23872	2.43773050239899e-09	2.26581529205559e-06
TraesCS4D03G0053900	4D:15347936-15348610|+	--	Germin||Cupin 1||RmlC-like cupin domain superfamily||RmlC-like jelly roll fold||Germin, manganese binding site	37.0766124161116	2720.64244824006	-6.22505	8.2540298396104e-14	4.40369000002894e-10
TraesCS2A03G0214200	2A:62117305-62119795|+	--	Acid phosphatase, class B-like||Vegetative storage protein/acid phosphatase||HAD superfamily||HAD-like superfamily	0.946566861550192	78.1772561515731	-6.22228	1.18457609484853e-07	5.56333660320061e-05
TraesCS7D03G0132000LC	7D:32882108-32882338|+	--	--	1.89313372310038	145.790018228609	-6.20772	2.9180061857249e-09	2.64764397994549e-06
TraesCS4A03G0080900	4A:35165760-35168237|-	--	Cupin 1||RmlC-like cupin domain superfamily||RmlC-like jelly roll fold	0.946566861550192	77.1208067441194	-6.20268	1.31615864756652e-07	6.01196028809665e-05
TraesCS4A03G0122700	4A:58550208-58556640|+	--	Globin||Leghaemoglobin||Globin-like superfamily||Globin/Protoglobin||Leghaemoglobin, iron-binding site	0.946566861550192	77.1208067441194	-6.20268	1.31615864756652e-07	6.01196028809665e-05
TraesCS5A03G1006700	5A:611941996-611942914|-	--	Dehydrin||Dehydrin, conserved site	0.946566861550192	77.1208067441194	-6.20268	1.31615864756652e-07	6.01196028809665e-05
TraesCS5A03G1126000	5A:653435363-653435860|+	--	Zinc finger C2H2-type||Zinc finger C2H2 superfamily	0.946566861550192	77.1208067441194	-6.20268	1.31615864756652e-07	6.01196028809665e-05
TraesCS7B03G0716200	7B:485517282-485518403|-	--	DC1||Zinc finger, ZZ-type superfamily	0.946566861550192	77.1208067441194	-6.20268	1.31615864756652e-07	6.01196028809665e-05
TraesCSU03G0153300LC	Un:128763387-128764280|+	--	--	8.6393528314487	626.328035622776	-6.19181	1.80933887758086e-12	5.74594332123179e-09
TraesCS5D03G1109300	5D:536398798-536399756|-	--	PLAC8 motif-containing protein	2.83970058465058	211.289881490738	-6.18807	4.05424218487281e-10	4.92868578945307e-07
TraesCS5B03G0705500	5B:458882264-458883172|+	--	Protein of unknown function DUF4228, plant	1.89313372310038	143.677119413702	-6.18667	3.29566838420884e-09	2.9305083272385e-06
TraesCS3B03G0738200	3B:472512729-472514140|-	--	SWEET sugar transporter	7.57253489240153	538.631226708185	-6.16146	3.51573946232785e-12	9.87219641021659e-09
TraesCS1A03G0104500	1A:26395408-26399476|+	--	Multicopper oxidase, type 1||Multicopper oxidase, copper-binding site||Cupredoxin||Multicopper oxidase, type 2||Multicopper oxidase, type 3||Laccase||Laccase, second cupredoxin domain||Laccase, first cupredoxin domain||Laccase, third cupredoxin domain	1.89313372310038	140.507771191341	-6.15452	3.96692395789151e-09	3.33822282336637e-06
TraesCS3D03G0913700	3D:528737677-528738732|+	--	--	7.57253489240153	535.619849579021	-6.15338	3.70572410370895e-12	1.00958742560826e-08
TraesCS4A03G1086100	4A:710667969-710669156|-	--	Chalcone/stilbene synthase, N-terminal||Polyketide synthase, type III||Chalcone/stilbene synthase, C-terminal||Thiolase-like	1.30769361697326	99.6154978796194	-6.15279	1.62073017950464e-08	1.07016332347688e-05
TraesCS7A03G0068700LC	7A:14547407-14547811|+	--	--	1.89313372310038	139.942757212982	-6.14871	4.22304105846267e-09	3.48773508593035e-06
TraesCS2A03G1104100LC	2A:716601368-716602478|-	--	--	26.5038721234054	1844.12981166237	-6.14643	2.41227303643401e-13	1.14910349142703e-09
TraesCS1B03G0226300LC	1B:86530998-86531412|-	--	--	8.29488638333132	580.394668695752	-6.13979	3.71628592710484e-12	1.00958742560826e-08
TraesCS4D03G0118200	4D:39918438-39919030|+	--	--	20.8244709541042	1434.59491837708	-6.13022	3.44349958327644e-13	1.53097991472471e-09
TraesCS5A03G1006400	5A:611835775-611836692|-	--	Dehydrin||Dehydrin, conserved site	5.67940116930115	397.074911350598	-6.12887	1.05424246913582e-11	2.36327496694682e-08
TraesCS3B03G1277500	3B:773027405-773028917|+	--	Aspartic peptidase A1 family||Aspartic peptidase domain superfamily||Xylanase inhibitor, C-terminal||Xylanase inhibitor, N-terminal||Peptidase family A1 domain||Xylanase inhibitor I-like	3.78626744620077	265.168801270876	-6.11597	1.60029202549083e-10	2.27344603234158e-07
TraesCS2A03G0474400	2A:215999235-216000697|+	--	AAA+ ATPase domain||ATPase, AAA-type, core||ATPase, AAA-type, conserved site||AAA-type ATPase, N-terminal domain||P-loop containing nucleoside triphosphate hydrolase	0.946566861550192	71.838559706851	-6.10049	2.53726217386153e-07	0.000103809824769831
TraesCS5D03G0978700LC	5D:499564408-499564839|-	--	--	0.946566861550192	71.838559706851	-6.10049	2.53726217386153e-07	0.000103809824769831
TraesCS4B03G0140300LC	4B:60393203-60393616|-	--	--	1.97592013209081	139.748016898743	-6.08874	4.22304105846267e-09	3.48773508593035e-06
TraesCS1B03G1037600	1B:621274606-621275345|+	--	Late embryogenesis abundant protein, LEA_4 subgroup	1.89313372310038	133.97655561255	-6.08591	6.19894784879684e-09	4.80706781437513e-06
TraesCS2A03G0706200	2A:478596530-478597896|+	--	--	0.946566861550192	71.0236625358398	-6.08406	2.53726217386153e-07	0.000103809824769831
TraesCS4B03G0745700	4B:564002829-564006547|-	--	Tetratricopeptide-like helical domain superfamily	8.51910175395173	571.893081815682	-6.08059	4.30515282945477e-12	1.14844256878535e-08
TraesCS3B03G1206000	3B:748447242-748450109|+	--	Potassium transporter	0.946566861550192	70.7821102993973	-6.07915	2.84278909134897e-07	0.000114726538276589
TraesCS5D03G0980800	5D:499966271-499967342|+	--	Cysteine-rich secretory protein-related||Venom allergen 5-like||CAP domain||Allergen V5/Tpx-1-related, conserved site||CAP superfamily	104.185304855191	6817.12659330709	-6.06281	1.28430611759029e-13	6.58849038323817e-10
TraesCS5B03G0125000	5B:55780451-55781607|+	--	Germin||Cupin 1||RmlC-like cupin domain superfamily||RmlC-like jelly roll fold||Germin, manganese binding site	18.9313372310038	1238.4076478399	-6.05472	9.6405148781801e-13	3.76245271312484e-09
TraesCS2D03G0080700	2D:16342011-16344299|+	--	Cytochrome P450||Cytochrome P450, E-class, group I||Cytochrome P450, conserved site||Cytochrome P450 superfamily	1.89313372310038	130.833618944038	-6.0517	7.55305549300559e-09	5.6916753765937e-06
TraesCS2D03G0959100	2D:540101003-540101644|-	--	--	11.3588023386023	737.760091364421	-6.03817	2.81105367690831e-12	8.33196309835624e-09
TraesCSU03G0098700LC	Un:52505212-52506586|+	--	--	1.89313372310038	128.883948388058	-6.03006	8.635365256541e-09	6.2534600266901e-06
TraesCS3A03G0663900	3A:494401804-494403052|-	--	Glycoside hydrolase, family 19, catalytic||Chitin-binding, type 1||Glycoside hydrolase, family 19||Chitin-binding, type 1, conserved site||Lysozyme-like domain superfamily||Endochitinase-like superfamily	47.3283430775096	3026.67922932355	-6.02769	2.90177493923256e-13	1.35803067156084e-09
TraesCS1D03G0721900	1D:402245329-402252883|-	--	Cytochrome P450||Cytochrome P450, E-class, group I||Cytochrome P450, conserved site||Cytochrome P450 superfamily	4.73283430775096	304.994233123956	-6.00516	1.24675971950253e-10	1.879014817935e-07
TraesCS6B03G1083900LC	6B:666798679-666799269|+	--	--	2.09655349788082	135.845932031853	-5.96741	5.44554007912431e-09	4.29778778552426e-06
TraesCS3A03G0068000LC	3A:19286338-19289307|+	--	--	6.65321009793024	414.557513069579	-5.9673	1.78053643305304e-11	3.7399677077262e-08
TraesCS5B03G0576200	5B:395144374-395145107|+	--	Chlorophyll A-B binding protein||Chlorophyll a/b binding domain superfamily	2.83970058465058	179.596399267127	-5.95375	1.77372320983744e-09	1.74597196847319e-06
TraesCS3A03G0663800	3A:494393566-494394821|-	--	Glycoside hydrolase, family 19, catalytic||Chitin-binding, type 1||Glycoside hydrolase, family 19||Chitin-binding, type 1, conserved site||Lysozyme-like domain superfamily||Endochitinase-like superfamily	58.6871454161119	3546.79177901966	-5.94687	3.9703303333163e-13	1.73627101592698e-09
TraesCS6A03G0619000	6A:423928277-423929473|+	--	SANT/Myb domain||Homeobox-like domain superfamily||Myb domain	0.946566861550192	64.4434138546751	-5.94405	5.78624056791125e-07	0.000206908516608044
TraesCS3B03G1311100	3B:783698028-783699459|+	--	Glycoside hydrolase family 17||Glycoside hydrolase superfamily	101.282654185871	6008.24933914767	-5.92131	3.32945689145017e-13	1.50536596671737e-09
TraesCS1D03G0577100	1D:327926094-327928324|-	--	--	1.89313372310038	117.26588422736	-5.89391	2.00708562502619e-08	1.27478609840949e-05
TraesCS1B03G0768600	1B:490526588-490527470|+	--	Proteinase inhibitor I12, Bowman-Birk||Bowman-Birk type wound-induced proteinase inhibitor WIP1	88.4178023170457	5058.59266453256	-5.86882	4.91493428823672e-13	2.04860604801567e-09
TraesCS4B03G0929000	4B:647582748-647586865|-	--	Palmitoyl protein thioesterase||Alpha/Beta hydrolase fold	3.78626744620077	221.854375565275	-5.8588	8.29119960137064e-10	9.2542276387516e-07
TraesCS4A03G0902100	4A:638483847-638489714|+	--	PLAC8 motif-containing protein	0.946566861550192	60.5680015055931	-5.85475	9.57264438737055e-07	0.00031027929729951
TraesCS1A03G0047200	1A:11504567-11504946|+	--	Proteinase inhibitor I12, Bowman-Birk||Bowman-Birk type proteinase inhibitor	4.28870452092453	248.700581906766	-5.84921	2.92749531433777e-10	3.73654856484566e-07
TraesCS2D03G0636300LC	2D:345716230-345718338|+	--	--	0.946566861550192	60.2176162248604	-5.84639	9.57264438737055e-07	0.00031027929729951
TraesCS5D03G0980700	5D:499944936-499945737|+	--	Cysteine-rich secretory protein-related||Venom allergen 5-like||CAP domain||Allergen V5/Tpx-1-related, conserved site||CAP superfamily	137.252194924778	7701.68340827494	-5.84156	5.17550174230616e-13	2.12402591504245e-09
TraesCS7A03G0865400	7A:522650363-522651916|-	--	FAD linked oxidase, N-terminal||Berberine/berberine-like||FAD-binding domain, PCMH-type||FAD-binding, type PCMH, subdomain 1||FAD-binding, type PCMH, subdomain 2||FAD-binding, type PCMH-like superfamily	26.5038721234054	1487.80762092383	-5.8367	1.91881811446528e-12	6.02192847311481e-09
TraesCS3A03G1131900	3A:713298182-713299609|-	--	Glycoside hydrolase family 17||Glycoside hydrolase superfamily	32.3724417708432	1813.32475955428	-5.8348	1.54942356827449e-12	5.23768614624989e-09
TraesCSU03G0214400LC	Un:178593538-178593732|+	--	--	1.47309452343782	88.404195620851	-5.82326	4.37291033755704e-08	2.42016091627949e-05
TraesCSU03G0229900LC	Un:189061918-189062112|+	--	--	1.47309452343782	88.404195620851	-5.82326	4.37291033755704e-08	2.42016091627949e-05
TraesCSU03G0491000LC	Un:299030674-299030868|+	--	--	1.47309452343782	88.404195620851	-5.82326	4.37291033755704e-08	2.42016091627949e-05
TraesCS6B03G1083500LC	6B:666760658-666761234|+	--	--	2.63628080987014	152.123275202374	-5.81692	1.92746669347638e-09	1.84290686434322e-06
TraesCS6B03G1083600LC	6B:666760658-666761234|+	--	--	2.63628080987014	152.123275202374	-5.81692	1.92746669347638e-09	1.84290686434322e-06
TraesCS2B03G1138100	2B:648315444-648316261|-	--	--	47.3283430775096	2594.05924753333	-5.80518	1.28869287844177e-12	4.64556367909631e-09
TraesCS2A03G0284500LC	2A:88885803-88893307|-	--	--	9.54559874680455	526.111804911938	-5.79838	1.93285511963404e-11	3.99696458692695e-08
TraesCS3D03G0073000	3D:15414053-15416918|-	--	Protein kinase domain||Serine-threonine/tyrosine-protein kinase, catalytic domain||Gnk2-homologous domain||Serine/threonine-protein kinase, active site||Protein kinase-like domain superfamily||Gnk2-homologous domain superfamily	5.67940116930115	311.652575198839	-5.77952	1.01191648247878e-10	1.59727124772804e-07
TraesCS5D03G1147100LC	5D:547263038-547263577|-	--	--	6.87747275513996	375.131181045165	-5.77621	1.05992468970187e-10	1.64386924549344e-07
TraesCS1D03G0651600	1D:368458523-368459618|+	--	--	0.946566861550192	57.0482680024993	-5.76855	1.62638744344548e-06	0.000479928223908756
TraesCS3B03G1182100	3B:741324812-741325216|+	--	VQ||VQ motif-containing protein 29	0.946566861550192	57.0482680024993	-5.76855	1.62638744344548e-06	0.000479928223908756
TraesCS6A03G0444700LC	6A:203821160-203823177|+	--	--	0.946566861550192	57.0482680024993	-5.76855	1.62638744344548e-06	0.000479928223908756
TraesCS3D03G1030100	3D:571645631-571647067|+	--	Aspartic peptidase A1 family||Aspartic peptidase domain superfamily||Xylanase inhibitor, C-terminal||Xylanase inhibitor, N-terminal||Peptidase family A1 domain||Xylanase inhibitor I-like	5.67940116930115	308.739889890784	-5.76598	1.10600838162401e-10	1.70542656579203e-07
TraesCS1D03G0354600	1D:196202946-196204068|+	--	Chitinase-like||Glycoside hydrolase family 18, catalytic domain||Glycosyl hydrolases family 18 (GH18) active site||Glycoside hydrolase superfamily	5.67940116930115	300.031631716848	-5.72472	1.45111230453875e-10	2.13866695225832e-07
TraesCS3B03G1232200	3B:757212208-757213541|-	--	--	1.89313372310038	103.110547280361	-5.70852	5.92815917169518e-08	3.16279148128281e-05
TraesCS4B03G0966900	4B:660343964-660344779|-	--	Germin||Cupin 1||RmlC-like cupin domain superfamily||Germin, manganese binding site	0.946566861550192	54.7081	-5.70826	2.14312140825752e-06	0.000598637766352646
TraesCS1A03G0037600	1A:9634267-9636102|+	--	NADH:flavin oxidoreductase/NADH oxidase, N-terminal||Aldolase-type TIM barrel	7.57253489240153	390.886280757866	-5.69904	7.20569943551093e-11	1.20137023838556e-07
TraesCS3A03G0978000	3A:662760341-662761544|+	--	--	2.83970058465058	150.364941627119	-5.69765	8.40665543169502e-09	6.12721148349443e-06
TraesCS6B03G0213700	6B:71691641-71695374|-	--	Terpene synthase, N-terminal domain||Terpene synthase, metal-binding domain||Terpenoid cyclases/protein prenyltransferase alpha-alpha toroid||Isoprenoid synthase domain superfamily||Terpene synthase, N-terminal domain superfamily	0.946566861550192	53.9246644916158	-5.6875	2.46726852125648e-06	0.000671600561969775
TraesCS4A03G0860800	4A:624832999-624833865|-	--	Leucine-rich repeat||Serralysin-like metalloprotease, C-terminal||Leucine-rich repeat domain superfamily	0.946566861550192	53.1962565742164	-5.66792	2.46726852125648e-06	0.000671600561969775
TraesCSU03G0553000LC	Un:341179218-341179610|-	--	--	116.228733752708	5779.61388194578	-5.66699	1.75046265137738e-12	5.62594478170397e-09
TraesCS1B03G0877700LC	1B:551365118-551365357|-	--	--	2.9146796589256	150.855741198731	-5.66633	8.40665543169502e-09	6.12721148349443e-06
TraesCS1B03G0877800LC	1B:551365118-551365357|-	--	--	2.9146796589256	150.855741198731	-5.66633	8.40665543169502e-09	6.12721148349443e-06
TraesCS7D03G0267700LC	7D:75820861-75821100|-	--	--	2.9146796589256	150.855741198731	-5.66633	8.40665543169502e-09	6.12721148349443e-06
TraesCSU03G0153800LC	Un:129516825-129517064|-	--	--	2.9146796589256	150.855741198731	-5.66633	8.40665543169502e-09	6.12721148349443e-06
TraesCS5B03G1336900LC	5B:704109377-704110404|+	--	--	0.946566861550192	52.8224703726845	-5.65777	2.84614177021629e-06	0.000756789858095117
TraesCS6D03G0888600	6D:485590963-485591911|+	--	Barwin domain||Barwin, conserved site||RlpA-like domain superfamily||Pathogenesis-related protein-4	50.1680436621602	2477.37182031455	-5.65494	2.87830057643164e-12	8.43753254691103e-09
TraesCS6A03G0821900	6A:554656788-554658752|+	--	Myc-type, basic helix-loop-helix (bHLH) domain||Helix-loop-helix DNA-binding domain superfamily	1.89313372310038	99.306244300647	-5.65435	8.26414528218194e-08	4.18319429881376e-05
TraesCS3D03G0695400	3D:420587282-420588738|+	--	Plant peroxidase||Haem peroxidase||Haem peroxidase superfamily||Peroxidases heam-ligand binding site||Peroxidase, active site||Secretory peroxidase	9.46566861550192	469.998722583151	-5.64768	5.61670383634698e-11	9.72929815184364e-08
TraesCS4A03G0493800	4A:455568510-455569040|-	--	Germin||Cupin 1||RmlC-like cupin domain superfamily||RmlC-like jelly roll fold||Germin, manganese binding site	0.954438879126742	52.573991232038	-5.64044	2.84614177021629e-06	0.000756789858095117
TraesCS1A03G0001700	1A:269472-289602|-	--	--	209.792622481216	10226.4576739677	-5.63894	1.70387159274087e-12	5.57957834168146e-09
TraesCS1D03G0640800	1D:364169119-364169889|+	--	Proteinase inhibitor I12, Bowman-Birk||Bowman-Birk type wound-induced proteinase inhibitor WIP1	33.1298401542567	1614.51835653255	-5.63404	6.08034439357086e-12	1.52345217688884e-08
TraesCS1A03G0953900LC	1A:560559374-560563888|+	--	--	1.89313372310038	97.1933454857396	-5.62336	9.79872649810603e-08	4.78798054736663e-05
TraesCS1A03G0002200	1A:294611-305428|-	--	--	19.2111219345871	931.057613985127	-5.62219	1.47814182218359e-11	3.17991219746528e-08
TraesCS2D03G1095100	2D:592255986-592257678|+	--	Transferase||Chloramphenicol acetyltransferase-like domain superfamily	3.78626744620077	188.195721670838	-5.62157	3.66625362306024e-09	3.1753565470375e-06
TraesCS3A03G1126500	3A:711878988-711880077|-	--	Glycoside hydrolase family 17||Glycoside hydrolase superfamily	70.9925146162644	3404.42939958698	-5.61368	3.14017513654081e-12	9.0072378432648e-09
TraesCS5A03G0043700	5A:16141514-16142455|-	--	Thaumatin family||Thaumatin, conserved site||Osmotin/thaumatin-like superfamily	57.7405785545617	2765.78454871376	-5.61146	3.73954115024248e-12	1.00958742560826e-08
TraesCS6B03G0292400	6B:117462635-117475576|-	--	--	1018.63373010224	48528.4484349906	-5.60654	1.71512004805023e-12	5.57957834168146e-09
TraesCS1B03G0841700	1B:533939659-533940423|-	--	YbhB/YbcL||Phosphatidylethanolamine-binding protein||PEBP-like superfamily	17.0382035079035	817.044487143195	-5.60573	2.23037904007257e-11	4.54180086053252e-08
TraesCS4B03G0048900	4B:18522191-18523400|+	--	--	3.78626744620077	185.819719369368	-5.60325	4.03046448070637e-09	3.3810273738152e-06
TraesCS4A03G1000600LC	4A:678311729-678313455|+	--	--	0.946566861550192	50.7095715577772	-5.59902	3.81108979376572e-06	0.000950143290123418
TraesCS6B03G0919600	6B:580356387-580357565|+	--	--	0.946566861550192	50.7095715577772	-5.59902	3.81108979376572e-06	0.000950143290123418
TraesCS2A03G0215800	2A:62561773-62563598|+	--	WRKY domain||WRKY domain superfamily	0.950758960892977	50.7930888352809	-5.59576	3.81108979376572e-06	0.000950143290123418
TraesCS6B03G0439700	6B:190911381-190913344|-	--	Cytochrome P450||Cytochrome P450, E-class, group I||Cytochrome P450, conserved site||Cytochrome P450 superfamily	0.946566861550192	50.1789250084541	-5.58388	4.42440630962989e-06	0.00106907122025079
TraesCS6A03G0901500	6A:585428818-585429741|+	--	Dehydrin||Dehydrin, conserved site	3.78626744620077	182.209139419115	-5.57496	4.88433171675813e-09	3.91274573201922e-06
TraesCS2D03G0379100	2D:128057390-128063711|-	--	NAD-dependent epimerase/dehydratase||NAD(P)-binding domain superfamily	0.947841358222547	49.7308588930935	-5.56926	4.42440630962989e-06	0.00106907122025079
TraesCSU03G0360200LC	Un:244004994-244006063|+	--	--	1.89313372310038	93.3634467408947	-5.56544	1.38992396107842e-07	6.3057162560762e-05
TraesCS1D03G0846000	1D:446080761-446083463|+	--	Protein kinase domain||S-locus glycoprotein domain||Bulb-type lectin domain||PAN/Apple domain||Serine/threonine-protein kinase, active site||Protein kinase-like domain superfamily||Protein kinase, ATP binding site||S-receptor-like serine/threonine-protein kinase||Bulb-type lectin domain superfamily	5.67940116930115	268.338149493237	-5.56373	4.06474311620811e-10	4.92868578945307e-07
TraesCS7D03G0087400	7D:20279143-20279833|+	--	Late embryogenesis abundant protein, LEA_1 subgroup	5.67940116930115	265.168801270876	-5.54659	4.50224584645998e-10	5.33786267556295e-07
TraesCS5A03G0245700	5A:139698859-139700625|-	--	FAD linked oxidase, N-terminal||D-arabinono-1,4-lactone oxidase||L-gulonolactone oxidase, plant||FAD-binding domain, PCMH-type||FAD-binding, type PCMH, subdomain 2||Vanillyl-alcohol oxidase, C-terminal subdomain 2||FAD-binding, type PCMH-like superfamily	3.78626744620077	178.506969855859	-5.54536	5.9413673547534e-09	4.64785676115548e-06
TraesCS2D03G1104300LC	2D:594940109-594940526|-	--	--	1.20792092000441	60.755620326496	-5.54463	9.57264438737055e-07	0.00031027929729951
TraesCSU03G0103400	Un:53415115-53421357|+	--	Fatty acyl-coenzyme A reductase, NAD-binding domain||Fatty acyl-CoA reductase||Fatty acyl-CoA reductase, C-terminal||NAD(P)-binding domain superfamily	9.46566861550192	436.274593526406	-5.54029	1.12545112575464e-10	1.70582580855856e-07
TraesCS4A03G0016000LC	4A:5623364-5624305|+	--	--	1.52083116519218	74.238275304385	-5.52926	1.81761897569775e-07	7.89425257480759e-05
TraesCS4A03G1113100	4A:719214995-719215656|-	--	Late embryogenesis abundant protein, LEA_1 subgroup	20.8244709541042	942.698721265853	-5.52451	1.92976714922858e-11	3.99696458692695e-08
TraesCS4D03G0668900	4D:453545564-453547300|-	--	--	10.4122354770521	473.965423322403	-5.52402	1.00122458200172e-10	1.58980160413559e-07
TraesCSU03G0172300LC	Un:149514336-149516605|-	--	--	11.9442424447294	538.262448841062	-5.51168	9.95104454360951e-11	1.5895452948822e-07
TraesCS7B03G1160100LC	7B:706700426-706703884|+	--	--	0.946566861550192	47.5402233354161	-5.50614	6.00382232437213e-06	0.00138186336777352
TraesCS3B03G0904500	3B:582152904-582153224|+	--	--	2.83970058465058	130.999726524258	-5.49892	2.88696409169184e-08	1.72674112354196e-05
TraesCS3B03G0254800	3B:89121104-89121892|+	--	--	1.89313372310038	88.7647898954491	-5.49267	2.19039472764118e-07	9.21624128620759e-05
TraesCSU03G0469900LC	Un:289370046-289370443|+	--	--	44.488642492859	1954.79908873255	-5.48603	1.09833577946934e-11	2.4214219217458e-08
TraesCS2A03G0202000LC	2A:56782741-56783931|-	--	--	1.89313372310038	87.7386869487839	-5.47592	2.40506048607613e-07	9.93236755401482e-05
TraesCS6A03G0062600LC	6A:15550713-15551627|-	--	--	1.89313372310038	87.6853008186563	-5.47504	2.40506048607613e-07	9.93236755401482e-05
TraesCS7A03G1041100	7A:625924880-625927669|+	--	Major facilitator superfamily||MFS transporter superfamily	7.57253489240153	330.668664533005	-5.45776	3.42404746962501e-10	4.32890475354108e-07
TraesCS1A03G0753800	1A:498145915-498153380|+	--	Cytochrome P450||Cytochrome P450, E-class, group I||Cytochrome P450, conserved site||Cytochrome P450 superfamily	14.1985029232529	607.667283603999	-5.43959	9.13936973934734e-11	1.48659650711481e-07
TraesCS4A03G0035800	4A:13663764-13665538|+	--	--	5.67940116930115	243.88467807863	-5.42594	9.8544466928075e-10	1.08179925916598e-06
TraesCS7A03G1382000	7A:743201573-743212139|+	--	ABC transporter-like||AAA+ ATPase domain||ABC-2 type transporter||ABC transporter-like, conserved site||P-loop containing nucleoside triphosphate hydrolase||ABC transporter family G domain	1.89313372310038	83.7273630486965	-5.4085	3.52720469880052e-07	0.000137964387896192
TraesCS2A03G0830400	2A:579932004-579934898|-	--	NADP-dependent oxidoreductase domain||NADP-dependent oxidoreductase domain superfamily	6.96154580137313	294.147114463597	-5.40827	1.00722525046157e-09	1.09668329719645e-06
TraesCS5D03G1078600	5D:528653747-528654268|+	--	Zinc finger C2H2-type||Zinc finger C2H2 superfamily	0.946566861550192	44.2465988812208	-5.40284	1.13841205220871e-05	0.00229541042363715
TraesCS4A03G1157500	4A:733613862-733624050|+	--	Late embryogenesis abundant protein, LEA_1 subgroup	0.946566861550192	43.9240392811605	-5.39231	1.13841205220871e-05	0.00229541042363715
TraesCS3A03G0207800	3A:60580008-60580586|+	--	Proteinase inhibitor I13, potato inhibitor I||Proteinase inhibitor I13, potato inhibitor I superfamily	161.862933325083	6605.82505286954	-5.38239	1.02248932318472e-11	2.33127565686115e-08
TraesCS7A03G0530300LC	7A:204599715-204600176|-	--	--	0.946566861550192	43.3984123190815	-5.37499	1.13841205220871e-05	0.00229541042363715
TraesCS2A03G0880200LC	2A:608746488-608749441|-	--	--	0.946566861550192	43.3144257056013	-5.37221	1.13841205220871e-05	0.00229541042363715
TraesCS2B03G1337200	2B:738265546-738265755|+	--	--	0.946566861550192	43.3144257056013	-5.37221	1.13841205220871e-05	0.00229541042363715
TraesCS5B03G0990600	5B:579456064-579457940|+	--	UDP-glucuronosyl/UDP-glucosyltransferase	1.89313372310038	81.5155186694536	-5.36993	4.29559367196492e-07	0.000163933128459708
TraesCS6A03G0491500	6A:262711257-262711523|+	--	Ribosomal protein S19/S15||Ribosomal protein S19, bacterial-type||Ribosomal protein S19 conserved site||Ribosomal protein S19, superfamily	0.365182381407403	19.7319818586616	-5.36929	0.000290613193839001	0.0293540233201409
TraesCS6D03G0633900	6D:392122699-392123364|-	--	--	5.67940116930115	233.807835413298	-5.3651	1.43723018478693e-09	1.48029159881761e-06
TraesCS1D03G0421900	1D:236543321-236545863|-	--	Low-temperature-induced 78kDa/65kDa	11.3588023386023	461.751385191522	-5.36227	2.33420842145471e-10	3.08254177478841e-07
TraesCS1A03G0451400	1A:301165284-301166354|-	--	Uncharacterised protein family, basic secretory protein	29.3435727080559	1183.06295536049	-5.35989	4.09816477334437e-11	7.64980327407191e-08
TraesCS5D03G0448400LC	5D:293161111-293161620|-	--	--	298.214899817027	11970.4067468433	-5.35897	1.04676451586177e-11	2.36327496694682e-08
TraesCS6A03G1010300	6A:613666904-613667709|+	--	Barwin domain||Barwin, conserved site||RlpA-like domain superfamily||Pathogenesis-related protein-4	114.534590247573	4595.55492242356	-5.35742	1.34310591365631e-11	2.93677814366359e-08
TraesCS2A03G1086200	2A:710682857-710683087|+	--	--	1.89313372310038	80.7666295823817	-5.35664	4.74741926714024e-07	0.000177369966905088
TraesCS5B03G1052800	5B:606489252-606490086|-	--	Dehydrin||Dehydrin, conserved site	9.46566861550192	382.434685498236	-5.35032	3.88010478935534e-10	4.79192941485385e-07
TraesCS5B03G0843400	5B:523574474-523576138|+	--	Transferase||Chloramphenicol acetyltransferase-like domain superfamily	1.89313372310038	80.2901549664805	-5.34811	4.74741926714024e-07	0.000177369966905088
TraesCS7A03G0068900LC	7A:14553488-14554387|+	--	--	0.946566861550192	42.2579762981476	-5.33668	1.5927855128145e-05	0.00300489012304383
TraesCS7A03G0901300	7A:547387895-547389012|+	--	DC1	0.946566861550192	42.2579762981476	-5.33668	1.5927855128145e-05	0.00300489012304383
TraesCS7A03G1308500	7A:720557347-720558996|-	--	Alpha carbonic anhydrase domain||Carbonic anhydrase, alpha-class, conserved site||Carbonic anhydrase, alpha-class||Alpha carbonic anhydrase domain superfamily||Carbonic anhydrase, prokaryotic-like	0.946566861550192	42.2579762981476	-5.33668	1.5927855128145e-05	0.00300489012304383
TraesCS7B03G1077500	7B:673601695-673603958|-	--	Multi antimicrobial extrusion protein	0.946566861550192	42.1531022410128	-5.33311	1.5927855128145e-05	0.00300489012304383
TraesCS7A03G1245600LC	7A:705060714-705062116|+	--	--	2.02322680399474	84.064875393345	-5.32422	3.20078231943193e-07	0.000126682595182739
TraesCS6B03G1173900	6B:698526210-698532047|-	--	Protein kinase domain||Gnk2-homologous domain||Serine/threonine-protein kinase, active site||Protein kinase-like domain superfamily||Protein kinase, ATP binding site||Gnk2-homologous domain superfamily	1.89313372310038	78.8618408868186	-5.32226	5.81628195052176e-07	0.000207426654160586
TraesCS6B03G0025400	6B:7696523-7697623|-	--	Rhodanese-like domain||Rhodanese-like domain superfamily	2.83970058465058	115.152985412452	-5.3131	8.75526407960811e-08	4.38190290033069e-05
TraesCS4D03G0118100	4D:39856525-39857017|+	--	--	28.3970058465058	1103.75602368034	-5.30689	5.95059293082184e-11	1.02411623885551e-07
TraesCS4A03G0902000	4A:638483801-638484792|+	--	PLAC8 motif-containing protein	4.73283430775096	187.697609246024	-5.30515	1.00656237467709e-08	6.97430075503532e-06
TraesCS5B03G0001700	5B:1104112-1106464|+	--	Sugar/inositol transporter||Major facilitator, sugar transporter-like||Sugar transporter, conserved site||Major facilitator superfamily domain||MFS transporter superfamily	0.946566861550192	41.2015268906939	-5.30027	1.89213743980186e-05	0.00344536917024944
TraesCS7B03G0222700	7B:96470343-96471392|+	--	Alpha crystallin/Hsp20 domain||HSP20-like chaperone	0.946566861550192	41.2015268906939	-5.30027	1.89213743980186e-05	0.00344536917024944
TraesCS5B03G1089700	5B:620137677-620138828|+	--	Cysteine-rich secretory protein-related||Venom allergen 5-like||CAP domain||Allergen V5/Tpx-1-related, conserved site||CAP superfamily	6.39848675301652	251.176892547619	-5.29996	1.83470072845238e-09	1.7993557585366e-06
TraesCS7D03G1237700	7D:623302796-623305457|-	--	Alpha carbonic anhydrase domain||Carbonic anhydrase, alpha-class, conserved site||Carbonic anhydrase, alpha-class||Alpha carbonic anhydrase domain superfamily||Carbonic anhydrase, prokaryotic-like	17.0382035079035	656.461132925559	-5.29008	1.74032080732792e-10	2.38075886442459e-07
TraesCS7D03G0397000	7D:129763870-129765560|-	--	NADH:flavin oxidoreductase/NADH oxidase, N-terminal||Aldolase-type TIM barrel	6.62596803085134	257.773655418701	-5.2879	1.484093752857e-09	1.51105667752723e-06
TraesCS3A03G0847700	3A:604705156-604705965|+	--	Zinc finger C2H2-type||Zinc finger C2H2 superfamily	2.83970058465058	113.117553226909	-5.2874	1.01489881214846e-07	4.91351011122909e-05
TraesCS4D03G0089500	4D:25983545-25987824|-	--	RNA recognition motif domain||Nucleotide-binding alpha-beta plait domain superfamily||RNA-binding domain superfamily	1.89313372310038	76.7312255446987	-5.28281	7.15570159060281e-07	0.000245039147151374
TraesCS7D03G1108100	7D:582648417-582651286|-	--	Ureide permease||Ureide permease, plant	5.67940116930115	220.797926157821	-5.28255	2.40025167112517e-09	2.23878019506766e-06
TraesCS5B03G0892600LC	5B:538540934-538542686|+	--	--	1.89313372310038	76.6843918079584	-5.28193	7.15570159060281e-07	0.000245039147151374
TraesCS2D03G0943900	2D:535494654-535496102|-	--	Peptidase C1A, papain C-terminal||Cathepsin propeptide inhibitor domain (I29)||Cysteine peptidase, histidine active site||Papain-like cysteine peptidase superfamily||Papain-like cysteine endopeptidase	2.57350853124751	102.475592523008	-5.28069	6.43492922888032e-08	3.36748939520469e-05
TraesCS6A03G0150800	6A:38884974-38888823|-	--	Terpene synthase, N-terminal domain||Terpene synthase, metal-binding domain||Terpenoid cyclases/protein prenyltransferase alpha-alpha toroid||Isoprenoid synthase domain superfamily||Terpene cyclase-like 1, C-terminal domain||Terpene synthase, N-terminal domain superfamily	52.6398635348483	2002.97653387432	-5.27907	3.66089302184947e-11	7.12831987232528e-08
TraesCS2B03G1190400LC	2B:675234045-675236285|+	--	--	34.8486324055931	1320.19912072828	-5.27102	5.27728935263738e-11	9.2616428138786e-08
TraesCS3B03G1319800	3B:786791488-786793427|+	--	Glycoside hydrolase family 17||Glycoside hydrolase superfamily	44.6753834819541	1687.84667370232	-5.26819	4.43271433907474e-11	8.09911559651766e-08
TraesCS7A03G1316200LC	7A:723399916-723400844|+	--	--	3.78626744620077	146.846467636063	-5.26391	3.32628034896681e-08	1.92951711434896e-05
TraesCS4A03G0949900LC	4A:660754353-660755548|+	--	--	0.946566861550192	40.1450774832403	-5.2629	2.25449581999321e-05	0.00398020718028715
TraesCS6B03G0846500LC	6B:535007651-535007899|-	--	--	4.18557780437961	161.059666753926	-5.25688	1.42976458052934e-08	9.65579745574701e-06
TraesCS1A03G0887200	1A:545914083-545915232|+	--	Late embryogenesis abundant protein, LEA_4 subgroup	62.4619406590073	2324.61955606032	-5.24763	4.09267535081228e-11	7.64980327407191e-08
TraesCS3B03G0092600LC	3B:26033588-26034990|-	--	--	1.18274274821739	48.3344497330426	-5.24291	5.14799342538857e-06	0.00121310279401883
TraesCS3B03G0721100LC	3B:462208646-462209485|+	--	--	0.473283430775096	22.0525851589132	-5.24185	0.00016479894528675	0.0190310678115556
TraesCS3B03G0721300LC	3B:462236399-462237238|+	--	--	0.473283430775096	22.0525851589132	-5.24185	0.00016479894528675	0.0190310678115556
TraesCS2D03G0347300	2D:112106511-112107245|+	--	Proteinase inhibitor I13, potato inhibitor I||Proteinase inhibitor I13, potato inhibitor I superfamily	17.072295870223	634.401221791305	-5.23791	2.4185896146472e-10	3.17824120986841e-07
TraesCS7D03G0100700	7D:23488150-23489256|-	--	Glutathione S-transferase, N-terminal||Glutathione S-transferase, C-terminal-like||Thioredoxin-like superfamily||Glutathione S-transferase, C-terminal domain superfamily||Glutathione Transferase family	2.83970058465058	108.81428896773	-5.2315	1.37287998889357e-07	6.23900282516608e-05
TraesCSU03G0182900LC	Un:158698333-158698629|-	--	--	7.56102125878084	282.020775269722	-5.23043	1.46764191347627e-09	1.50003125225644e-06
TraesCS1D03G0617400	1D:351373093-351374826|-	--	AAA+ ATPase domain||ATPase, AAA-type, core||ATPase, AAA-type, conserved site||AAA-type ATPase, N-terminal domain||P-loop containing nucleoside triphosphate hydrolase	1.89313372310038	73.9514585217584	-5.22966	8.84207100825745e-07	0.000291558821033716
TraesCS5A03G1270900	5A:701911417-701912455|-	--	Germin||Cupin 1||RmlC-like cupin domain superfamily||RmlC-like jelly roll fold||Germin, manganese binding site	0.983847776428061	40.5272503763559	-5.22724	1.89213743980186e-05	0.00344536917024944
TraesCS7D03G0267500LC	7D:75819271-75819933|-	--	--	1153.95394015399	42254.9800171924	-5.2269	2.13586780432047e-11	4.3828007344656e-08
TraesCS2D03G0705200	2D:393506106-393507308|+	--	U box domain||Armadillo-like helical||Zinc finger, RING/FYVE/PHD-type||Armadillo-type fold	0.946566861550192	39.0886280757866	-5.22455	2.69459260827937e-05	0.004593032103416
TraesCS4A03G0227300	4A:133262476-133266267|-	--	Asparagine synthase||Asparagine synthase, glutamine-hydrolyzing||Rossmann-like alpha/beta/alpha sandwich fold||Glutamine amidotransferase type 2 domain||Nucleophile aminohydrolases, N-terminal||Asparagine synthase, N-terminal domain	0.946566861550192	38.8596305877376	-5.2161	2.69459260827937e-05	0.004593032103416
TraesCS4D03G0053800	4D:15342696-15343368|+	--	Cupin 1||RmlC-like cupin domain superfamily||RmlC-like jelly roll fold||Germin, manganese binding site	1.89313372310038	72.9790031701196	-5.21059	9.84556415576598e-07	0.000317966427868297
TraesCS5D03G0389800	5D:250439210-250442605|+	--	Asparagine synthase||Asparagine synthase, glutamine-hydrolyzing||Rossmann-like alpha/beta/alpha sandwich fold||Glutamine amidotransferase type 2 domain||Nucleophile aminohydrolases, N-terminal||Asparagine synthase, N-terminal domain	90.8329740304039	3284.12607620265	-5.20679	4.19526798093732e-11	7.71813576961958e-08
TraesCS6A03G0900100	6A:585010119-585013307|+	--	Dehydrin||Dehydrin, conserved site	30.2901395696061	1094.03728440177	-5.20143	1.12532255065964e-10	1.70582580855856e-07
TraesCS1D03G0572300	1D:324464362-324464838|+	--	NPR1/NH1-interacting protein	0.946566861550192	38.3203012340021	-5.196	2.69459260827937e-05	0.004593032103416
TraesCS5A03G0533600	5A:415572699-415574309|+	--	Alcohol dehydrogenase, zinc-type, conserved site||GroES-like superfamily||Alcohol dehydrogenase, C-terminal||Alcohol dehydrogenase, N-terminal||Polyketide synthase, enoylreductase domain||NAD(P)-binding domain superfamily	18.0374871861607	649.725915560946	-5.19357	2.91079916436716e-10	3.73309992830088e-07
TraesCS5A03G0849900	5A:557356204-557357716|-	--	Cupin 1||RmlC-like cupin domain superfamily||RmlC-like jelly roll fold	20.8244709541042	746.546141429418	-5.18799	1.73207668027032e-10	2.38075886442459e-07
TraesCS3B03G1146200	3B:723211443-723212824|-	--	Nucleotide-diphospho-sugar transferase	10.4122354770521	375.03953964606	-5.18638	8.7809749256733e-10	9.76005362988587e-07
TraesCS1A03G0037700	1A:9650321-9652002|+	--	NADH:flavin oxidoreductase/NADH oxidase, N-terminal||Aldolase-type TIM barrel	23.9485229094744	856.791626892411	-5.18615	1.38400751014253e-10	2.05109913003123e-07
TraesCS3D03G0187000	3D:48096985-48097655|+	--	--	0.946566861550192	38.0321786683329	-5.18515	3.23096056900313e-05	0.00533348416700046
TraesCS7D03G0574800	7D:233533119-233533490|-	--	--	0.966397196265853	38.5437317038773	-5.17793	2.69459260827937e-05	0.004593032103416
TraesCS1A03G0676100	1A:463052778-463053617|+	--	Proteinase inhibitor I12, Bowman-Birk||Bowman-Birk type proteinase inhibitor||Bowman-Birk type wound-induced proteinase inhibitor WIP1	482.749099390598	17085.848999663	-5.17761	3.21906178509179e-11	6.31409501316976e-08
TraesCS4D03G0237400	4D:99462452-99463801|-	--	Protein kinase domain||NAF domain||Protein kinase-like domain superfamily||Protein kinase, ATP binding site||NAF/FISL domain||KA1 domain/Ssp2, C-terminal||Serine/threonine-protein kinase, active site	2.10661182743966	78.7059064626695	-5.17442	5.81628195052176e-07	0.000207426654160586
TraesCS1B03G0040100	1B:9782826-9784767|+	--	NADH:flavin oxidoreductase/NADH oxidase, N-terminal||Aldolase-type TIM barrel	23.6641715387548	836.707930703323	-5.16908	1.72273369249082e-10	2.38075886442459e-07
TraesCS1B03G0673000	1B:427314274-427314474|-	--	--	1.89313372310038	70.8129033319807	-5.1672	1.36889946621528e-06	0.000415435291931271
TraesCS2D03G1104500LC	2D:594942222-594942422|-	--	--	1.89313372310038	70.8129033319807	-5.1672	1.36889946621528e-06	0.000415435291931271
TraesCS3B03G0453000	3B:213118412-213118612|-	--	--	1.89313372310038	70.8129033319807	-5.1672	1.36889946621528e-06	0.000415435291931271
TraesCS3B03G0453500LC	3B:213122187-213122387|+	--	--	1.89313372310038	70.8129033319807	-5.1672	1.36889946621528e-06	0.000415435291931271
TraesCS3D03G1100700	3D:591787595-591787795|+	--	--	1.89313372310038	70.8129033319807	-5.1672	1.36889946621528e-06	0.000415435291931271
TraesCS6B03G0738000	6B:458328955-458329155|-	--	--	1.89313372310038	70.8129033319807	-5.1672	1.36889946621528e-06	0.000415435291931271
TraesCS7A03G0607800	7A:262875580-262875780|+	--	--	1.89313372310038	70.8129033319807	-5.1672	1.36889946621528e-06	0.000415435291931271
TraesCS7B03G0970300	7B:627920082-627920282|+	--	--	1.89313372310038	70.8129033319807	-5.1672	1.36889946621528e-06	0.000415435291931271
TraesCS7D03G0575600LC	7D:233539807-233540007|+	--	--	1.89313372310038	70.8129033319807	-5.1672	1.36889946621528e-06	0.000415435291931271
TraesCS5D03G1148100	5D:547578392-547580009|+	--	Leucine-rich repeat||Serralysin-like metalloprotease, C-terminal||Leucine-rich repeat-containing N-terminal, plant-type||Leucine-rich repeat domain superfamily	48.2026582826478	1696.61320637667	-5.16632	7.38011152415507e-11	1.22280655290907e-07
TraesCS1B03G0672900	1B:427313641-427313880|+	--	--	27.3354912502553	962.575451486283	-5.16418	1.61926355579885e-10	2.27344603234158e-07
TraesCS2B03G0864400	2B:483076657-483076896|+	--	--	27.3354912502553	962.575451486283	-5.16418	1.61926355579885e-10	2.27344603234158e-07
TraesCS3B03G0456000LC	3B:213145822-213146061|-	--	--	27.3354912502553	962.575451486283	-5.16418	1.61926355579885e-10	2.27344603234158e-07
TraesCS5D03G1008600	5D:506537005-506537244|-	--	--	27.3354912502553	962.575451486283	-5.16418	1.61926355579885e-10	2.27344603234158e-07
TraesCS6B03G0737900	6B:458328322-458328561|+	--	--	27.3354912502553	962.575451486283	-5.16418	1.61926355579885e-10	2.27344603234158e-07
TraesCS7D03G0575700	7D:233540401-233540640|-	--	--	27.3354912502553	962.575451486283	-5.16418	1.61926355579885e-10	2.27344603234158e-07
TraesCS5A03G0588200	5A:446978514-446979884|-	--	Protein of unknown function DUF716	2.83970058465058	103.532041930462	-5.1598	2.19866029414411e-07	9.23645070969893e-05
TraesCS1D03G0207800LC	1D:78972201-78974718|+	--	--	3.78626744620077	136.281973561526	-5.15629	6.09212279249961e-08	3.24378178867704e-05
TraesCS1A03G0001500	1A:233818-245051|+	--	--	173.938071536812	6060.66421240095	-5.1544	4.5277874509039e-11	8.20251929801059e-08
TraesCS7B03G0275300	7B:123912137-123912980|+	--	Cysteine-rich secretory protein-related||Venom allergen 5-like||CAP domain||Allergen V5/Tpx-1-related, conserved site||CAP superfamily	0.946566861550192	37.1702818633752	-5.15218	3.88700910579674e-05	0.00612462226262455
TraesCS5B03G1167100	5B:650244261-650244947|-	--	Proteinase inhibitor I12, Bowman-Birk||Bowman-Birk type wound-induced proteinase inhibitor WIP1	0.946566861550192	36.9757292608792	-5.14464	3.88700910579674e-05	0.00612462226262455
TraesCS7D03G0132200	7D:32974098-32974575|+	--	--	15.1450697848031	526.820366914433	-5.14135	5.61924439820034e-10	6.4334319127207e-07
TraesCS7B03G0721700	7B:488034770-488035509|+	--	Cysteine-rich transmembrane CYSTM domain	9.46566861550192	327.499316310644	-5.12668	1.59318364782747e-09	1.59175157263841e-06
TraesCS2A03G0464000	2A:208278190-208289442|-	--	Protein kinase domain||Serine-threonine/tyrosine-protein kinase, catalytic domain||Gnk2-homologous domain||Serine/threonine-protein kinase, active site||Protein kinase-like domain superfamily||Protein kinase, ATP binding site||Gnk2-homologous domain superfamily	4.73283430775096	164.806107562776	-5.11764	3.30370581906473e-08	1.92951711434896e-05
TraesCS2A03G1045100	2A:694700052-694700369|+	--	Bifunctional inhibitor/plant lipid transfer protein/seed storage helical domain||Bifunctional inhibitor/plant lipid transfer protein/seed storage helical domain superfamily||Putative lipid-transfer protein DIR1-like	5.67940116930115	195.14757003646	-5.10449	7.29683418590988e-09	5.52983945293557e-06
TraesCS3B03G0285900	3B:106646583-106647089|+	--	--	0.946566861550192	35.9192798534255	-5.10296	4.6924325382676e-05	0.00709610716501284
TraesCS4D03G0680800	4D:459256222-459256708|+	--	--	0.946566861550192	35.9192798534255	-5.10296	4.6924325382676e-05	0.00709610716501284
TraesCS5A03G0971800LC	5A:601548840-601549037|-	--	--	0.946566861550192	35.9192798534255	-5.10296	4.6924325382676e-05	0.00709610716501284
TraesCS6A03G0755000	6A:517330396-517330701|-	--	--	1.89313372310038	67.6127620770362	-5.1006	1.92464422740891e-06	0.000549110261073369
TraesCS1B03G1155000LC	1B:659587375-659595572|+	--	--	3.78626744620077	130.999726524258	-5.09931	8.92093303023489e-08	4.42961955882923e-05
TraesCS2A03G1008700	2A:680920925-680922113|-	--	Peptidase C1A, papain C-terminal||Cathepsin propeptide inhibitor domain (I29)||Cysteine peptidase, histidine active site||Papain-like cysteine peptidase superfamily||Papain-like cysteine endopeptidase	5.69677279136301	194.99413033948	-5.09905	7.29683418590988e-09	5.52983945293557e-06
TraesCS1B03G0403000LC	1B:212296236-212296976|-	--	--	5.67940116930115	194.386690971479	-5.09886	7.63519633882235e-09	5.70522402057213e-06
TraesCS1B03G0226000LC	1B:86501588-86501965|+	--	--	195.404798077451	6521.66191562707	-5.09239	6.52949078766123e-11	1.10943118631625e-07
TraesCS3D03G0599000	3D:359144889-359146354|-	--	SWEET sugar transporter	11.3588023386023	382.04770106323	-5.08899	1.35488301904365e-09	1.41183044593783e-06
TraesCSU03G0197400LC	Un:166497771-166498067|+	--	--	0.486948672347223	20.2139143060048	-5.08447	0.000290613193839001	0.0293540233201409
TraesCSU03G0520800	Un:315924729-315925025|+	--	--	0.486948672347223	20.2139143060048	-5.08447	0.000290613193839001	0.0293540233201409
TraesCS4A03G0859500	4A:624633429-624635026|-	--	Serralysin-like metalloprotease, C-terminal||Leucine-rich repeat-containing N-terminal, plant-type||Leucine-rich repeat domain superfamily	26.5761237798173	883.236246625242	-5.08055	2.68679215080705e-10	3.51337585367298e-07
TraesCS4D03G0620300	4D:428553304-428557493|+	--	Glycoside hydrolase family 10 domain||Carbohydrate-binding, CenC-like||Galactose-binding-like domain superfamily||Glycoside hydrolase superfamily	1.89313372310038	66.5563126695825	-5.07792	2.16177917294669e-06	0.00060133077390538
TraesCS6B03G0185700LC	6B:60407434-60407865|+	--	--	1.89313372310038	66.4589511502945	-5.07582	2.16177917294669e-06	0.00060133077390538
TraesCS5D03G1074400	5D:527275220-527277246|-	--	Chalcone/stilbene synthase, N-terminal||Polyketide synthase, type III||Chalcone/stilbene synthase, C-terminal||Thiolase-like||Chalcone/stilbene synthase, active site	1041.01543723945	34111.3004215901	-5.06661	6.15136934293912e-11	1.05188415764259e-07
TraesCS4A03G1006800	4A:680323570-680324187|-	--	--	0.946566861550192	34.8628304459718	-5.06004	5.68506249828575e-05	0.00830984806598743
TraesCS5B03G1192500	5B:660446632-660447117|+	--	Zinc finger C2H2-type||Zinc finger C2H2 superfamily	0.946566861550192	34.8628304459718	-5.06004	5.68506249828575e-05	0.00830984806598743
TraesCS4B03G0161500LC	4B:70440096-70440485|-	--	--	60.3044226213116	1970.67051440227	-5.05994	1.26582359128772e-10	1.89702865849389e-07
TraesCS4A03G0009300	4A:3365529-3365927|-	--	Proteinase inhibitor I12, Bowman-Birk||Bowman-Birk type proteinase inhibitor	5.67940116930115	188.703568171065	-5.05608	9.60740691416734e-09	6.69785393935986e-06
TraesCS5D03G1073800	5D:526597537-526598980|-	--	O-methyltransferase domain||Plant methyltransferase dimerisation||O-methyltransferase COMT-type||S-adenosyl-L-methionine-dependent methyltransferase||Winged helix-like DNA-binding domain superfamily||Winged helix DNA-binding domain superfamily	288.393523509024	9372.58420698686	-5.05431	7.765385833625e-11	1.27085541409681e-07
TraesCS4D03G0053200	4D:15230643-15231317|-	--	Germin||Cupin 1||RmlC-like cupin domain superfamily||RmlC-like jelly roll fold||Germin, manganese binding site	48.2749099390598	1558.92845064106	-5.04207	1.96515177343438e-10	2.66103495980383e-07
TraesCS6B03G0202500	6B:67154943-67155206|-	--	--	2.83970058465058	95.2317	-5.03938	4.27247514663201e-07	0.000163284451305953
TraesCS1B03G0226100LC	1B:86520249-86520545|-	--	--	0.98321488144265	35.2481041348664	-5.02738	5.68506249828575e-05	0.00830984806598743
TraesCS6B03G1083700LC	6B:666779528-666780118|+	--	--	1.04827674894041	37.2910401656067	-5.02616	3.88700910579674e-05	0.00612462226262455
TraesCS6B03G1083800LC	6B:666779528-666780118|+	--	--	1.04827674894041	37.2910401656067	-5.02616	3.88700910579674e-05	0.00612462226262455
TraesCS6A03G0449300	6A:207557295-207559049|+	--	Cytochrome P450||Cytochrome P450, E-class, group I||Cytochrome P450, conserved site||Cytochrome P450 superfamily	2.83970058465058	94.0239972633785	-5.02099	4.65717921985382e-07	0.000174736046658802
TraesCS7A03G0848900	7A:513601301-513602091|-	--	Zinc finger, RING-type||Zinc finger, RING/FYVE/PHD-type	0.946566861550192	33.8063810385181	-5.01581	6.91331674174254e-05	0.00970629670540653
TraesCS7A03G1349100LC	7A:733406124-733406709|-	--	--	0.946566861550192	33.8063810385181	-5.01581	6.91331674174254e-05	0.00970629670540653
TraesCS3A03G1202000	3A:731460313-731460898|-	--	ABA/WDS induced protein	3.78626744620077	123.353665104602	-5.01263	1.51889384787169e-07	6.80974996400425e-05
TraesCSU03G0498700LC	Un:303451345-303451599|-	--	--	549.956015403407	17323.8391841357	-5.00957	9.68786684152826e-11	1.55682852930487e-07
TraesCS1D03G0640500	1D:364057454-364058228|+	--	Proteinase inhibitor I12, Bowman-Birk||Bowman-Birk type proteinase inhibitor||Bowman-Birk type wound-induced proteinase inhibitor WIP1	342.657203881169	10793.5353652068	-5.00933	1.02549022589125e-10	1.60917513328676e-07
TraesCS7D03G0829400LC	7D:454060685-454061632|+	--	--	36.9161076004575	1159.49688573932	-5.00093	2.86669958895954e-10	3.71223680752838e-07
TraesCS2A03G0324800	2A:110070395-110072113|+	--	UDP-glucuronosyl/UDP-glucosyltransferase||UDP-glycosyltransferase family, conserved site	9.46566861550192	300.031631716848	-5.00035	3.55842524268668e-09	3.11228038602983e-06
TraesCS4B03G0566000	4B:433187957-433188899|-	--	Conserved hypothetical protein CHP01589, plant	28.3970058465058	886.970942158679	-4.99147	4.61001237065811e-10	5.41747533038219e-07
TraesCS6A03G0825600	6A:556292774-556294577|-	--	UDP-glucuronosyl/UDP-glucosyltransferase||UDP-glycosyltransferase family, conserved site	42.5955087697586	1327.95690516929	-4.99082	2.8649188669788e-10	3.71223680752838e-07
TraesCS2A03G1006000	2A:679960159-679961302|+	--	Cysteine-rich transmembrane CYSTM domain	2.83970058465058	91.9110984484711	-4.98825	5.5460850830298e-07	0.00020211388753402
TraesCS3A03G0755200	3A:553329799-553331211|+	--	Plant peroxidase||Haem peroxidase||Haem peroxidase superfamily||Peroxidases heam-ligand binding site||Peroxidase, active site||Secretory peroxidase	61.5268460007625	1908.93297180354	-4.98513	2.28313320349684e-10	3.03009260380506e-07
TraesCS7B03G0873600	7B:584305210-584307597|+	--	PPM-type phosphatase, divalent cation binding||PPM-type phosphatase domain||PPM-type phosphatase domain superfamily	8.51910175395173	265.797889409733	-4.97554	5.41861754080869e-09	4.28922971865319e-06
TraesCS1A03G0872100	1A:541369936-541372466|-	--	Protein kinase domain||S-locus glycoprotein domain||Bulb-type lectin domain||PAN/Apple domain||Serine/threonine-protein kinase, active site||Protein kinase-like domain superfamily||Protein kinase, ATP binding site||S-receptor-like serine/threonine-protein kinase||Bulb-type lectin domain superfamily	0.946566861550192	32.7499316310644	-4.97017	8.43945324357924e-05	0.0112509172776472
TraesCS5A03G1111500	5A:650055248-650056482|-	--	Serpin family||Serpin, conserved site||Serpin domain||Serpin superfamily||Serpin superfamily, domain 1||Serpin superfamily, domain 2	0.946566861550192	32.7499316310644	-4.97017	8.43945324357924e-05	0.0112509172776472
TraesCS7B03G1329000LC	7B:760048909-760049259|+	--	--	0.946566861550192	32.7499316310644	-4.97017	8.43945324357924e-05	0.0112509172776472
TraesCS1D03G0935700	1D:470457072-470459095|+	--	Cytochrome P450||Cytochrome P450, E-class, group I||Cytochrome P450, conserved site||Cytochrome P450 superfamily	0.946566861550192	32.6540044168972	-4.96595	8.43945324357924e-05	0.0112509172776472
TraesCS6A03G0701100	6A:486764119-486765613|-	--	Transferase||Chloramphenicol acetyltransferase-like domain superfamily	1.89313372310038	61.2740656323141	-4.95885	3.94671368339223e-06	0.000976010198737925
TraesCS1B03G0860700	1B:543909555-543918132|+	--	Cytochrome P450||Cytochrome P450, E-class, group I||Cytochrome P450, conserved site||Cytochrome P450 superfamily	2.83970058465058	89.908970945598	-4.95652	6.6250711481415e-07	0.000230417728745532
TraesCS7A03G1161300	7A:676609571-676612387|+	--	Ureide permease||Ureide permease, plant	3.73490800924776	117.038783672942	-4.95596	2.3081719232555e-07	9.60574012866831e-05
TraesCS3B03G0098000	3B:27827819-27828867|-	--	Aspartic peptidase A1 family||Aspartic peptidase domain superfamily||Xylanase inhibitor, C-terminal||Xylanase inhibitor, N-terminal||Peptidase family A1 domain	2.83970058465058	89.7981996335637	-4.95474	6.6250711481415e-07	0.000230417728745532
TraesCS4D03G0486800	4D:343179055-343179511|+	--	Proteolipid membrane potential modulator	5.76178470686805	178.087101012901	-4.95227	3.94678820183742e-08	2.24009621430245e-05
TraesCS5B03G0483900	5B:334382010-334382504|-	--	Cysteine-rich secretory protein-related||Venom allergen 5-like||CAP domain||Allergen V5/Tpx-1-related, conserved site||CAP superfamily	287.928241238069	8706.01881469053	-4.95021	1.55754682834967e-10	2.27044367175168e-07
TraesCS4B03G0101500	4B:37446921-37449905|-	--	Glutamine synthetase, catalytic domain||Glutamine synthetase, beta-Grasp domain||Glutamine synthetase/guanido kinase, catalytic domain||Glutamine synthetase, N-terminal conserved site||Glutamine synthetase, glycine-rich site||Glutamine synthetase, N-terminal domain superfamily	5.67940116930115	173.257702822405	-4.93296	2.0806983713533e-08	1.3152774823275e-05
TraesCS3A03G1196500	3A:729992619-729996053|+	--	--	10.0614382064704	303.762867733283	-4.93124	5.97827038779557e-09	4.66305090248054e-06
TraesCS5A03G0940900LC	5A:592076828-592078408|+	--	--	0.946566861550192	31.6934822236107	-4.92305	0.000103439177017536	0.0132852358503601
TraesCS2B03G0188400	2B:52883559-52885321|+	--	UDP-glucuronosyl/UDP-glucosyltransferase	2.84737395107011	87.6853008186563	-4.91671	8.70192273350152e-07	0.00028944200852729
TraesCS4D03G0827800	4D:507709996-507713033|-	--	Flavin monooxygenase FMO||Flavin monooxygenase-like||FAD/NAD(P)-binding domain superfamily	3.78626744620077	115.152985412452	-4.91348	2.66421340665773e-07	0.000108174363525116
TraesCS1B03G1219700LC	1B:678984749-678987697|-	--	--	8.78245527786577	261.596586480153	-4.90927	1.22819196322316e-08	8.42242900024189e-06
TraesCS6A03G0754900LC	6A:517326089-517329098|-	--	--	1.89313372310038	59.1611668174067	-4.90833	5.07387754400262e-06	0.00119885524680083
TraesCS7B03G0882400	7B:588534280-588538056|+	--	Sugar transporter, conserved site||Major facilitator superfamily||MFS transporter superfamily	18.9313372310038	559.297037831567	-4.90809	1.74301685829614e-09	1.72210065599658e-06
TraesCS6D03G0874500	6D:482299115-482300006|+	--	--	6.62596803085134	197.961217173939	-4.90722	1.5633117965737e-08	1.03738570859204e-05
TraesCS3B03G0898000	3B:579225500-579228382|-	--	Zinc finger C2H2-type	1.95943632174019	60.9786450737468	-4.90529	4.47144635786619e-06	0.00107556630335833
TraesCS3B03G0972900	3B:627786277-627787128|+	--	Zinc finger C2H2-type||Zinc finger C2H2 superfamily	6.62596803085134	197.55603919384	-4.90427	1.6341732379102e-08	1.07090964169115e-05
TraesCS5A03G0931300	5A:587248798-587251704|+	--	Glycoside hydrolase, family 3, N-terminal||Glycoside hydrolase family 3 C-terminal domain||Glycoside hydrolase superfamily||Glycoside hydrolase family 3 C-terminal domain superfamily||Glycoside hydrolase, family 3, N-terminal domain superfamily	6.18900709061119	184.729394742932	-4.904	2.8262851074186e-08	1.70189574549658e-05
TraesCS1B03G0824100	1B:521470448-521471734|-	--	Conserved hypothetical protein CHP01589, plant	30.3793191835206	892.596983297578	-4.90366	7.55271226621412e-10	8.50110347736405e-07
TraesCS1A03G0000100LC	1A:11085-42819|+	--	--	1819.4603033828	53012.1873591585	-4.89723	1.85331127246354e-10	2.5223944645019e-07
TraesCS3A03G1041000	3A:688689431-688692028|+	--	Alcohol dehydrogenase, zinc-type, conserved site||GroES-like superfamily||Alcohol dehydrogenase, C-terminal||Alcohol dehydrogenase, N-terminal||Polyketide synthase, enoylreductase domain||NAD(P)-binding domain superfamily	48.5332263818164	1413.54127503604	-4.89317	4.90873842501023e-10	5.69328287937273e-07
TraesCS4A03G0909100	4A:640911152-640912108|+	--	--	3.78626744620077	113.040086597545	-4.88679	3.08156465543907e-07	0.000122875663301185
TraesCS3D03G0338100	3D:127872872-127873664|-	--	Late embryogenesis abundant protein, LEA_2 subgroup||Water stress and hypersensitive response domain	53.1688489852217	1537.67342348336	-4.88331	4.39027449551909e-10	5.2517920377788e-07
TraesCS2B03G1510200LC	2B:795767917-795772812|+	--	--	2.88750085956724	86.8008798325779	-4.88277	9.54583210686781e-07	0.00031027929729951
TraesCS5D03G1073700	5D:526470255-526471825|-	--	O-methyltransferase domain||Plant methyltransferase dimerisation||O-methyltransferase COMT-type||S-adenosyl-L-methionine-dependent methyltransferase||Winged helix-like DNA-binding domain superfamily||Winged helix DNA-binding domain superfamily	671.305023025374	19340.8007011943	-4.88086	2.20799186497955e-10	2.94501954950972e-07
TraesCS2B03G1288000LC	2B:716596922-716597965|-	--	--	0.946566861550192	30.637032816157	-4.87433	0.000127311843100785	0.0155573555957698
TraesCS2D03G1194400	2D:622195159-622195401|-	--	--	0.946566861550192	30.637032816157	-4.87433	0.000127311843100785	0.0155573555957698
TraesCS3A03G0609700	3A:454414114-454414579|-	--	--	0.946566861550192	30.637032816157	-4.87433	0.000127311843100785	0.0155573555957698
TraesCS5D03G0830000	5D:447799748-447800257|-	--	Zinc finger C2H2-type||Zinc finger C2H2 superfamily	0.946566861550192	30.637032816157	-4.87433	0.000127311843100785	0.0155573555957698
TraesCS3A03G0222900LC	3A:66373974-66375251|-	--	--	24.0084964916241	691.757	-4.87393	1.40513680701632e-09	1.45284610325455e-06
TraesCS2A03G1127400	2A:722788126-722790953|+	--	NAD-dependent epimerase/dehydratase||NAD(P)-binding domain superfamily	11.4244690866881	330.668664533005	-4.87247	5.0565765247196e-09	4.03859986147964e-06
TraesCS1B03G0545900LC	1B:337600918-337601463|-	--	--	1.89313372310038	57.7020813239427	-4.87238	6.5649493401688e-06	0.00147661541819851
TraesCS4B03G0749900LC	4B:566127941-566129170|+	--	--	2.48209339571237	74.3621302921317	-4.8684	8.84207100825745e-07	0.000291558821033716
TraesCS5B03G1089900LC	5B:620181977-620182816|+	--	--	22.6759967622077	650.477900747035	-4.86712	1.26962435540641e-09	1.34934260178571e-06
TraesCS7B03G0837700	7B:562096792-562098355|-	--	UDP-glucuronosyl/UDP-glucosyltransferase	4.73283430775096	138.394872376434	-4.86587	1.43587974450138e-07	6.49212340073202e-05
TraesCS7B03G0560900LC	7B:362419765-362420235|+	--	--	19.6184634295692	561.066684502322	-4.86155	1.68737251683763e-09	1.67332153379779e-06
TraesCS3B03G0961300	3B:618835747-618839348|+	--	Oxoglutarate/iron-dependent dioxygenase||Non-haem dioxygenase N-terminal domain||Isopenicillin N synthase-like superfamily	0.946566861550192	30.2473442098705	-4.85593	0.000157376481949378	0.0185374027911271
TraesCS2A03G0085500	2A:20966821-20967948|+	--	Glutathione S-transferase, N-terminal||Glutathione S-transferase, C-terminal||Glutathione S-transferase, C-terminal-like||Glutathione S-transferases Phi, C-terminal||Thioredoxin-like superfamily||Glutathione S-transferase, C-terminal domain superfamily||Glutathione Transferase family	14.1985029232529	404.620123054764	-4.85302	3.90330789095694e-09	3.32568582976028e-06
TraesCS5B03G1191700	5B:660235454-660236376|-	--	Zinc finger C2H2-type||Zinc finger C2H2 superfamily	9.46566861550192	270.332132614344	-4.85003	9.10088151478689e-09	6.439658230463e-06
TraesCS3D03G1048800	3D:578078057-578079610|-	--	Glycoside hydrolase family 17||Glycoside hydrolase superfamily	198.77904092554	5554.94986494078	-4.83624	3.40347595840919e-10	4.32338688888207e-07
TraesCS3B03G1307400	3B:782136638-782138041|-	--	Glycoside hydrolase family 17||Glycoside hydrolase superfamily	139.145328647878	3882.59817352078	-4.83368	3.78905513338348e-10	4.70124812735525e-07
TraesCS5A03G0941000LC	5A:592079896-592082144|+	--	--	2.83970058465058	82.4030537813879	-4.83093	1.3944641494134e-06	0.000421754259067481
TraesCS5D03G1064500	5D:523603859-523604467|-	--	LURP-one-related||Tubby-like, C-terminal||LURP-one-related superfamily	1.89313372310038	55.9918185950456	-4.82907	8.5517311941291e-06	0.00183528544919218
TraesCS7B03G0279600	7B:126156060-126156973|-	--	--	0.946566861550192	29.5805834087033	-4.82391	0.000157376481949378	0.0185374027911271
TraesCS6A03G0833200LC	6A:558890662-558891012|-	--	--	14.293554996065	398.128621342629	-4.82016	4.56562334548443e-09	3.69068388982251e-06
TraesCS7D03G0902000	7D:498955866-498956996|-	--	Germin||Cupin 1||RmlC-like cupin domain superfamily||RmlC-like jelly roll fold||Germin, manganese binding site	3.85377155484355	109.735882191103	-4.81936	3.84877599919101e-07	0.00014944679556684
TraesCS5A03G1272500	5A:702252634-702253699|-	--	Germin||Cupin 1||RmlC-like cupin domain superfamily||RmlC-like jelly roll fold||Germin, manganese binding site	5.34926895418671	150.652671451138	-4.81588	7.09531992956271e-08	3.66788691915817e-05
TraesCS6A03G0175800	6A:50036799-50038156|+	--	Glycoside hydrolase family 18, catalytic domain||Glycoside hydrolase superfamily	5.67940116930115	158.354535628003	-4.80329	4.55189394465364e-08	2.50880832371034e-05
TraesCS7B03G0196500LC	7B:83060471-83061229|+	--	--	1.89313372310038	54.9353691875919	-4.80165	9.78616912528543e-06	0.00204429011422172
TraesCS4B03G0703600	4B:534204910-534208552|-	--	Aminotransferase, class I/classII||Pyridoxal phosphate-dependent transferase, major domain||Pyridoxal phosphate-dependent transferase, small domain||Pyridoxal phosphate-dependent transferase||LL-diaminopimelate aminotransferase/aminotransferase ALD1	10.8270956237757	296.889178137303	-4.79368	1.32748335397713e-08	9.05676367025419e-06
TraesCS3D03G1158300	3D:607732266-607735273|+	--	Pyridoxal phosphate-dependent decarboxylase||Glutamate decarboxylase||Pyridoxal phosphate-dependent transferase, major domain||Pyridoxal phosphate-dependent transferase	2.83970058465058	80.2901549664805	-4.79351	1.69467103368741e-06	0.000495148351529522
TraesCS1B03G0768500	1B:490521222-490521613|+	--	Proteinase inhibitor I12, Bowman-Birk||Bowman-Birk type wound-induced proteinase inhibitor WIP1	2.83970058465058	80.0995	-4.79009	1.69467103368741e-06	0.000495148351529522
TraesCSU03G0532700LC	Un:325745993-325746317|-	--	--	1.4253038176648	41.7024519984842	-4.78529	1.5927855128145e-05	0.00300489012304383
TraesCS1D03G0039900LC	1D:9374842-9375354|-	--	--	8.01666467922796	219.306505595219	-4.78468	3.01738877594089e-08	1.79669337024552e-05
TraesCS1D03G0224800	1D:84640687-84642518|+	--	Plant peroxidase||Haem peroxidase||Haem peroxidase superfamily||Peroxidases heam-ligand binding site||Peroxidase, active site||Secretory peroxidase	2.83970058465058	79.2337055590268	-4.77443	1.87088301580579e-06	0.000536308224678693
TraesCS3D03G0777200	3D:462753903-462755198|+	--	Zinc finger C2H2-type||Zinc finger C2H2 superfamily	4.73283430775096	129.86581048744	-4.77418	2.52169285748959e-07	0.000103649736003686
TraesCS3D03G1145700	3D:604186759-604188095|+	--	Plant peroxidase||Haem peroxidase||Haem peroxidase superfamily||Peroxidases heam-ligand binding site||Peroxidase, active site||Secretory peroxidase	1.00420656729985	30.1047172365134	-4.77363	0.000157376481949378	0.0185374027911271
TraesCS2B03G1481000	2B:785983766-785985171|-	--	Late embryogenesis abundant protein, LEA_2 subgroup	11.3588023386023	305.716046645628	-4.76755	1.01880042781924e-08	7.04080834520883e-06
TraesCS6A03G0097300	6A:24611152-24612725|+	--	Heavy metal-associated domain, HMA||Heavy metal-associated domain superfamily	17.5011948095665	468.813579011148	-4.7661	3.90722187425773e-09	3.32568582976028e-06
TraesCSU03G0464500	Un:286627368-286628233|-	--	--	6093.66136428077	162006.281679366	-4.76516	4.34940019002014e-10	5.22633330941339e-07
TraesCS4D03G0051700	4D:14902863-14903537|+	--	Germin||Cupin 1||RmlC-like cupin domain superfamily||RmlC-like jelly roll fold||Germin, manganese binding site	1.89313372310038	53.3019698753701	-4.7582	1.12192405722282e-05	0.00228635952257264
TraesCS5D03G1147000	5D:547262381-547263783|+	--	Leucine-rich repeat||Serralysin-like metalloprotease, C-terminal||Leucine-rich repeat-containing N-terminal, plant-type||Leucine-rich repeat domain superfamily	18.6798325067152	497.098415638652	-4.75721	3.47883651334667e-09	3.06275388878006e-06
TraesCS7A03G1074800	7A:642211001-642212053|+	--	Oxoglutarate/iron-dependent dioxygenase||Non-haem dioxygenase N-terminal domain||Isopenicillin N synthase-like superfamily	2.92906844256743	80.3269330789027	-4.75134	1.69467103368741e-06	0.000495148351529522
TraesCS2A03G0764300	2A:531769994-531771511|-	--	--	3.78626744620077	102.517077011145	-4.74599	7.14053978169202e-07	0.000245039147151374
TraesCS4D03G0705200	4D:467777502-467778138|+	--	Proteinase inhibitor I12, Bowman-Birk||Bowman-Birk type proteinase inhibitor	11.3588023386023	299.37605807254	-4.73733	1.2509030764919e-08	8.55617704320458e-06
TraesCS5A03G1071200	5A:636385671-636386339|+	--	Germin||Cupin 1||RmlC-like cupin domain superfamily||RmlC-like jelly roll fold||Germin, manganese binding site	127.01221611155	3311.80787777017	-4.73579	7.33883288351524e-10	8.29536889833273e-07
TraesCS4A03G0209000	4A:114054629-114055809|+	--	Conserved hypothetical protein CHP01589, plant	38.8092413235579	1012.92215096735	-4.73406	1.56102665985088e-09	1.57139423313894e-06
TraesCS5B03G0862100	5B:530176095-530176940|-	--	EF-hand domain||EF-hand domain pair||EF-Hand 1, calcium-binding site	0.946566861550192	27.6691604734333	-4.72795	0.000243816735867594	0.0256947274309031
TraesCS2D03G1047900	2D:576865173-576867330|+	Ppo-D2	Tyrosinase copper-binding domain||Uncharacterised domain, di-copper centre||Polyphenol oxidase||Polyphenol oxidase, central domain||Polyphenol oxidase, C-terminal	3.78626744620077	101.178173932667	-4.72704	7.73518182283386e-07	0.000260864361954382
TraesCS3B03G0084600	3B:23509651-23510460|-	--	Proteinase inhibitor I12, Bowman-Birk||Bowman-Birk type proteinase inhibitor	85.1910175395173	2208.30076440912	-4.72663	9.45598253741243e-10	1.04667132849798e-06
TraesCS4D03G0053500	4D:15239138-15239812|+	--	Germin||Cupin 1||RmlC-like cupin domain superfamily||RmlC-like jelly roll fold||Germin, manganese binding site	46.3817762159594	1203.44323764695	-4.72628	1.5254907917957e-09	1.54143910461902e-06
TraesCS5D03G0789100	5D:437169802-437170709|-	--	EF-hand domain||EF-hand domain pair||EF-Hand 1, calcium-binding site	3.78626744620077	101.031577403143	-4.72495	7.73518182283386e-07	0.000260864361954382
TraesCS4B03G0966800	4B:660330467-660336585|-	--	Germin||Cupin 1||RmlC-like cupin domain superfamily||RmlC-like jelly roll fold||Germin, manganese binding site	2.98770302453194	80.1478626707812	-4.7207	1.69467103368741e-06	0.000495148351529522
TraesCS1A03G0960000	1A:562746091-562746894|+	--	EF-hand domain||EF-hand domain pair||EF-Hand 1, calcium-binding site	0.946566861550192	27.467684593796	-4.71745	0.000243816735867594	0.0256947274309031
TraesCS2B03G1465700	2B:781640980-781644016|-	--	Armadillo-type fold	0.946566861550192	27.467684593796	-4.71745	0.000243816735867594	0.0256947274309031
TraesCS6D03G0411200LC	6D:207681957-207682487|-	--	--	0.946566861550192	27.467684593796	-4.71745	0.000243816735867594	0.0256947274309031
TraesCS7A03G1148200LC	7A:673482143-673483795|+	--	--	0.946566861550192	27.467684593796	-4.71745	0.000243816735867594	0.0256947274309031
TraesCS7B03G1137500LC	7B:699134496-699135395|-	--	--	0.946566861550192	27.467684593796	-4.71745	0.000243816735867594	0.0256947274309031
TraesCS7D03G0120600	7D:29922949-29924843|-	--	Pyridoxal phosphate-dependent decarboxylase||Aromatic-L-amino-acid decarboxylase||Pyridoxal phosphate-dependent transferase, major domain||Pyridoxal phosphate-dependent transferase, small domain||Pyridoxal phosphate-dependent transferase||Pyridoxal-phosphate binding site	0.946566861550192	27.467684593796	-4.71745	0.000243816735867594	0.0256947274309031
TraesCS6B03G0925000	6B:583761992-583762225|-	--	--	1.89313372310038	51.2940472658171	-4.70293	1.4829535983284e-05	0.00284136406281344
TraesCS7B03G0177200LC	7B:73464899-73465330|+	--	--	5.67940116930115	146.861812329876	-4.69468	8.9259309564685e-08	4.42961955882923e-05
TraesCS4B03G0851700	4B:618778942-618780402|-	--	NAC domain||NAC domain superfamily	11.3588023386023	289.467137642311	-4.68879	1.68968592582017e-08	1.09669250017467e-05
TraesCS5D03G1106000	5D:535372454-535373560|-	--	High-affinity nitrate transporter	1.89313372310038	50.7471921952433	-4.68751	1.70996143041565e-05	0.0031807788564855
TraesCS1A03G0676500	1A:463087911-463088655|+	--	Proteinase inhibitor I12, Bowman-Birk||Bowman-Birk type wound-induced proteinase inhibitor WIP1	130.626226893926	3290.2360415613	-4.68592	1.03359606209527e-09	1.11628374706289e-06
TraesCS5A03G1270700	5A:701829296-701829736|-	--	Germin||Cupin 1||RmlC-like cupin domain superfamily||RmlC-like jelly roll fold||Germin, manganese binding site	3.10576373986882	81.1498645874259	-4.68491	1.53653207537605e-06	0.000457461268334058
TraesCS4D03G0838600	4D:510185217-510185657|-	--	Germin||Cupin 1||RmlC-like cupin domain superfamily||RmlC-like jelly roll fold||Germin, manganese binding site	5.50200107996926	140.961540757233	-4.68035	1.27227004426351e-07	5.92230038979698e-05
TraesCSU03G0153700LC	Un:129516102-129529587|+	--	--	6655.00881539148	165875.467058718	-4.67208	7.94253244252672e-10	8.90231073264045e-07
TraesCS6D03G0181300	6D:72690275-72692265|-	--	Cytochrome P450||Cytochrome P450, E-class, group I||Cytochrome P450, conserved site||Cytochrome P450 superfamily	1.89313372310038	50.201632184145	-4.67195	1.70996143041565e-05	0.0031807788564855
TraesCS6A03G0342200	6A:122918699-122920650|-	--	Cytochrome P450||Cytochrome P450, E-class, group I||Cytochrome P450, conserved site||Cytochrome P450 superfamily	1.89313372310038	50.1837686996466	-4.67144	1.70996143041565e-05	0.0031807788564855
TraesCS3A03G0211800LC	3A:61693177-61694563|-	--	--	200.553140254426	4997.9719781137	-4.671	1.00135329112856e-09	1.09475821287481e-06
TraesCS1D03G0577200LC	1D:327940561-327942937|-	--	--	82.3333595867075	2050.17303063367	-4.66859	1.3718969421668e-09	1.42399699724675e-06
TraesCS3A03G0885500	3A:624479032-624480835|-	--	Oxygen oxidoreductase covalent FAD-binding site||FAD linked oxidase, N-terminal||Berberine/berberine-like||FAD-binding domain, PCMH-type||FAD-binding, type PCMH, subdomain 1||FAD-binding, type PCMH, subdomain 2||FAD-binding, type PCMH-like superfamily	7.57253489240153	191.217342749118	-4.66798	4.76899864835969e-08	2.60692229392711e-05
TraesCSU03G0489400	Un:298181019-298181315|-	--	--	0.988899876930074	27.5685922101836	-4.66688	0.000243816735867594	0.0256947274309031
TraesCS6B03G1083400	6B:666686288-666687492|+	--	Dehydrin||Dehydrin, conserved site	49.2215	1221.72486985678	-4.66253	1.89793016264139e-09	1.83439076154426e-06
TraesCS3D03G0214900	3D:56960813-56962050|-	--	NADPH-dependent FMN reductase-like||Flavoprotein-like superfamily	3.78626744620077	96.6718127695419	-4.66139	1.16527469925165e-06	0.000364108004308334
TraesCS5B03G0810000LC	5B:509163407-509163868|-	--	--	0.946566861550192	26.4112351863423	-4.66113	0.000305695076875518	0.0303487974348021
TraesCS6B03G0218500LC	6B:73675273-73675632|-	--	--	0.946566861550192	26.4112351863423	-4.66113	0.000305695076875518	0.0303487974348021
TraesCS3D03G1056700	3D:580310228-580311899|+	--	Glycoside hydrolase family 17||Glycoside hydrolase superfamily	223.150917118363	5519.72228115121	-4.66031	1.03342633868024e-09	1.11628374706289e-06
TraesCS4A03G0562500	4A:506567970-506568797|+	--	--	2.83970058465058	72.8950091143047	-4.65433	3.84753445569731e-06	0.00095583748299489
TraesCS5D03G1080000	5D:528876898-528877863|+	--	Actin-depolymerising factor homology domain||ADF/Cofilin||ADF-H/Gelsolin-like domain superfamily	5.67940116930115	142.262866946498	-4.64882	1.12892545765832e-07	5.3681311066833e-05
TraesCS2A03G0616400	2A:395492649-395494294|-	--	--	14.1985029232529	350.741203274625	-4.64693	1.43646550219564e-08	9.67655397388156e-06
TraesCS3B03G0742600	3B:476011489-476012642|+	--	Protein kinase domain||Protein kinase-like domain superfamily||Protein kinase, ATP binding site	0.946566861550192	26.1505285540961	-4.64688	0.00038525294388571	0.0365280505507327
TraesCS3A03G1217600	3A:735489526-735490438|+	PR4A	Barwin domain||Barwin, conserved site||RlpA-like domain superfamily||Pathogenesis-related protein-4	289.370826989947	7061.34208391032	-4.64094	1.14066968063888e-09	1.22695582260979e-06
TraesCS2D03G0971900	2D:546394844-546397485|+	--	Glycoside hydrolase family 16||Glycoside hydrolase, family 16, active site||Xyloglucan endo-transglycosylase, C-terminal||Concanavalin A-like lectin/glucanase domain superfamily||Xyloglucan endotransglucosylase/hydrolase	111.23563269916	2711.68446798524	-4.63852	1.50829732328989e-09	1.5298608135392e-06
TraesCS3D03G1101200LC	3D:591793304-591793854|+	--	--	165.208	4019.90945283264	-4.63634	1.30814024944867e-09	1.38475989263066e-06
TraesCS5B03G0554100	5B:380725734-380728280|+	--	Protein kinase domain||Serine-threonine/tyrosine-protein kinase, catalytic domain||Serine/threonine-protein kinase, active site||Protein kinase-like domain superfamily	2.83970058465058	71.838559706851	-4.63331	4.28350463542688e-06	0.00104438114798917
TraesCS6D03G0772000LC	6D:456186723-456187742|-	--	--	13.2519360617027	324.440443380851	-4.63315	1.74187412642768e-08	1.11966829389361e-05
TraesCS1B03G0767900	1B:490458359-490459222|+	--	Proteinase inhibitor I12, Bowman-Birk||Bowman-Birk type proteinase inhibitor||Bowman-Birk type wound-induced proteinase inhibitor WIP1	436.367323174638	10541.023356434	-4.62652	1.17660424931989e-09	1.26052590180151e-06
TraesCS2D03G0893600	2D:502925012-502927101|-	--	Oxoglutarate/iron-dependent dioxygenase||Non-haem dioxygenase N-terminal domain||Isopenicillin N synthase-like superfamily	0.946566861550192	25.7800955899644	-4.6264	0.00038525294388571	0.0365280505507327
TraesCS3B03G0854100	3B:557731850-557734238|-	--	--	0.946566861550192	25.7144582371523	-4.62274	0.00038525294388571	0.0365280505507327
TraesCS2B03G1436700	2B:773005046-773006542|+	--	Glutathione S-transferase, N-terminal||Glutathione S-transferase, C-terminal||Glutathione S-transferase, C-terminal-like||Thioredoxin-like superfamily||Glutathione S-transferase, C-terminal domain superfamily	7.22327328785799	176.427051044766	-4.61889	9.62694676135969e-08	4.7291315995039e-05
TraesCS6D03G0772500	6D:456720872-456722057|+	--	Dehydrin||Dehydrin, conserved site	62.4734128623127	1497.57590492902	-4.61304	2.50432122371647e-09	2.31962753346738e-06
TraesCSU03G0185500	Un:160624769-160625209|+	--	Germin||Cupin 1||RmlC-like cupin domain superfamily||RmlC-like jelly roll fold||Germin, manganese binding site	1.00782286831365	27.0045163659508	-4.61291	0.000305695076875518	0.0303487974348021
TraesCS2A03G0227600	2A:66980489-66981019|-	--	Thaumatin family||Osmotin/thaumatin-like superfamily	18.8527056792065	452.617165180736	-4.60881	8.15894068445045e-09	6.02902774787812e-06
TraesCS1D03G0750300LC	1D:413384835-413385378|-	--	--	0.946566861550192	25.3547857788886	-4.60251	0.000488130947575076	0.0435497697575676
TraesCS4D03G0098000LC	4D:30301856-30314818|-	--	--	0.946566861550192	25.3547857788886	-4.60251	0.000488130947575076	0.0435497697575676
TraesCS2D03G0543000LC	2D:275453161-275453711|+	--	--	4.86524141138181	117.913667665876	-4.59624	5.63190233398768e-07	0.000202875800659258
TraesCS2A03G1129400	2A:723170644-723174705|+	--	Major facilitator, sugar transporter-like||Sugar transporter, conserved site||Major facilitator superfamily domain||MFS transporter superfamily	9.46566861550192	224.25038946317	-4.58054	4.85612527750335e-08	2.64912061150674e-05
TraesCS4D03G0714500	4D:471373743-471374662|-	--	--	5.67940116930115	135.225524154072	-4.5757	1.83709165653794e-07	7.95556120613736e-05
TraesCS6A03G0157800	6A:41574190-41574724|+	--	Proteinase inhibitor I13, potato inhibitor I||Proteinase inhibitor I13, potato inhibitor I superfamily	20.8244709541042	488.079626243605	-4.575	8.7615719337904e-09	6.28871024461519e-06
TraesCS1B03G0108700	1B:30334559-30337342|+	--	Aromatic amino acid lyase||Phenylalanine ammonia-lyase||L-Aspartase-like||Phenylalanine/histidine ammonia-lyases, active site||Phenylalanine ammonia-lyase, shielding domain superfamily||Fumarase/histidase, N-terminal	0.946566861550192	24.812985599101	-4.5715	0.000488130947575076	0.0435497697575676
TraesCS5B03G1087600	5B:619612234-619612734|+	--	Cysteine-rich secretory protein-related||Venom allergen 5-like||CAP domain||Allergen V5/Tpx-1-related, conserved site||CAP superfamily	40.6924903728108	948.64364142062	-4.57134	4.32365802535833e-09	3.55694890592207e-06
TraesCS4B03G0692500	4B:525912956-525917345|-	--	Glycoside hydrolase family 10 domain||Carbohydrate-binding, CenC-like||Galactose-binding-like domain superfamily||Glycoside hydrolase superfamily	2.83970058465058	68.6692114844899	-4.56833	5.95245102294039e-06	0.00137122265533642
TraesCSU03G0290800	Un:218195675-218196721|-	--	--	2.83970058465058	68.6692114844899	-4.56833	5.95245102294039e-06	0.00137122265533642
TraesCS3D03G1145600	3D:604179398-604179795|-	--	ABA/WDS induced protein	2.83970058465058	68.607450909362	-4.56703	5.95245102294039e-06	0.00137122265533642
TraesCS3B03G0852000	3B:556707509-556711315|+	--	GH3 family	1.33664182341377	33.7727191708749	-4.56692	6.91331674174254e-05	0.00970629670540653
TraesCS2B03G0321000	2B:106003932-106005631|+	--	UDP-glucuronosyl/UDP-glucosyltransferase||UDP-glycosyltransferase family, conserved site	0.946566861550192	24.7030462573936	-4.56513	0.000488130947575076	0.0435497697575676
TraesCS4B03G0797300	4B:592125303-592125662|-	--	--	1.89313372310038	46.6020087798715	-4.56488	3.08679040211573e-05	0.00512722420715063
TraesCS5B03G1194100	5B:660724240-660725325|+	--	Actin-depolymerising factor homology domain||ADF/Cofilin||ADF-H/Gelsolin-like domain superfamily	3.78626744620077	90.1560026933139	-4.56085	1.94977626446503e-06	0.000555686235372533
TraesCS1A03G0378600	1A:241744482-241745717|+	--	Chitinase-like||Glycoside hydrolase family 18, catalytic domain||Glycosyl hydrolases family 18 (GH18) active site||Glycoside hydrolase superfamily	32.1832732927065	744.796832254852	-4.55965	6.60020603162867e-09	5.08864439594585e-06
TraesCS5B03G1282800LC	5B:688822452-688824156|+	--	--	49.2215	1132.51376479036	-4.55315	3.80369671338096e-09	3.2626177982685e-06
TraesCS2A03G1155500LC	2A:730899775-730900224|-	--	--	15.5651727622711	359.725287233155	-4.55194	1.82418447337417e-08	1.16683511866471e-05
TraesCS3B03G1430700	3B:820990704-820991649|-	--	Glycoside hydrolase family 17||Glycoside hydrolase superfamily	11.3588023386023	263.023155948584	-4.55064	3.86221508221217e-08	2.19676864676102e-05
TraesCS5D03G0812200	5D:443012951-443014039|-	--	Cupin 1||RmlC-like cupin domain superfamily||RmlC-like jelly roll fold	24.610738400305	566.256882395178	-4.54962	8.76968140274723e-09	6.28871024461519e-06
TraesCS1B03G0794500	1B:502605203-502607726|-	--	Glycoside hydrolase family 17||Glycoside hydrolase superfamily	4.73283430775096	110.927187782638	-4.54701	9.286630378236e-07	0.000304336796031724
TraesCS5D03G1027100	5D:510723571-510724263|+	--	Germin||Cupin 1||RmlC-like cupin domain superfamily||RmlC-like jelly roll fold||Germin, manganese binding site	212.592836835125	4858.72194663178	-4.54618	2.20936521436781e-09	2.07524741050971e-06
TraesCS6A03G0210100	6A:62947759-62948848|+	--	--	2.83970058465058	67.6127620770362	-4.546	6.65856036240394e-06	0.00149514946319434
TraesCS3B03G1393400LC	3B:809689338-809690279|+	--	--	10.4097718755471	239.713387408638	-4.54125	4.9640285843836e-08	2.69680356930814e-05
TraesCS5B03G1208400	5B:665785622-665786741|-	--	Proteinase inhibitor I12, Bowman-Birk||Bowman-Birk type proteinase inhibitor	33.7263600032398	769.660735055676	-4.53971	6.24829803768601e-09	4.83129270879165e-06
TraesCS1B03G1255500LC	1B:688138999-688139897|+	--	--	1.89313372310038	45.7562862389187	-4.53853	3.59784514253068e-05	0.00575476589920494
TraesCS7B03G0706100	7B:479153998-479154987|-	--	Glycoside hydrolase family 18, catalytic domain||Glycosyl hydrolases family 18 (GH18) active site||Glycoside hydrolase superfamily	19.877904092554	454.336093117319	-4.53838	1.15344865264176e-08	7.95074838704694e-06
TraesCS7A03G0254700LC	7A:68300525-68315796|+	--	--	8.54228945804902	195.574181253465	-4.5293	8.24263797901045e-08	4.18319429881376e-05
TraesCS5A03G0421300	5A:331878332-331883022|+	--	Asparagine synthase||Asparagine synthase, glutamine-hydrolyzing||Rossmann-like alpha/beta/alpha sandwich fold||Glutamine amidotransferase type 2 domain||Nucleophile aminohydrolases, N-terminal||Asparagine synthase, N-terminal domain	217.15243293004	4891.70909029617	-4.52535	2.5671156897729e-09	2.36956325745266e-06
TraesCS1A03G0542500	1A:366949034-366950604|+	--	Glycoside hydrolase, family 19, catalytic||Glycoside hydrolase, family 19||Lysozyme-like domain superfamily	147.852188956543	3331.37572442137	-4.5253	2.7720372954663e-09	2.52378385303273e-06
TraesCS4A03G0676400	4A:571259804-571261114|+	--	Transferase||Chloramphenicol acetyltransferase-like domain superfamily	26.5038721234054	599.306	-4.52505	9.51385573469797e-09	6.69634869601063e-06
TraesCS4B03G0336700	4B:194373582-194374676|+	--	Glycoside hydrolase family 18, catalytic domain||Glycoside hydrolase superfamily	11.3588023386023	257.935403271741	-4.52247	4.56458677417559e-08	2.51061684098779e-05
TraesCS1A03G0722000	1A:485515670-485516463|-	--	Conserved hypothetical protein CHP01589, plant	19.3961894234294	437.783949241998	-4.52002	1.61916362462543e-08	1.07016332347688e-05
TraesCS3B03G1460900	3B:830882524-830884432|+	--	Barwin domain||Barwin, conserved site||RlpA-like domain superfamily||Pathogenesis-related protein-4	254.239939488193	5682.53120722492	-4.51418	2.60252165831421e-09	2.39396095714448e-06
TraesCS5D03G0034800	5D:9185614-9186012|+	--	VQ||VQ motif-containing protein 29	14.9223422077812	335.81810850825	-4.51311	3.35344504527095e-08	1.94048807001405e-05
TraesCS3D03G0606900	3D:364179601-364180817|+	--	Glycoside hydrolase, family 19, catalytic||Chitin-binding, type 1||Glycoside hydrolase, family 19||Chitin-binding, type 1, conserved site||Lysozyme-like domain superfamily||Endochitinase-like superfamily	192.153072894689	4272.57102782349	-4.50646	2.94253660534122e-09	2.66085106725703e-06
TraesCS4A03G0619200	4A:542322335-542324050|+	--	Oxoglutarate/iron-dependent dioxygenase||Non-haem dioxygenase N-terminal domain||Isopenicillin N synthase-like superfamily	78.1170740152141	1732.08942117731	-4.50109	4.19256409261044e-09	3.48773508593035e-06
TraesCS2A03G1324000	2A:775549279-775550052|-	--	Glutathione S-transferase, N-terminal||Glutathione S-transferase, C-terminal-like||Thioredoxin-like superfamily||Glutathione S-transferase, C-terminal domain superfamily	2.83970058465058	65.4998632621288	-4.50028	8.36369005120027e-06	0.00180217928760758
TraesCS2B03G1146200	2B:653173161-653176956|+	--	Cation transporter	2.83970058465058	65.4998632621288	-4.50028	8.36369005120027e-06	0.00180217928760758
TraesCS5A03G1271400LC	5A:702033271-702033685|-	--	--	1.12396695088208	27.5227510592434	-4.49954	0.000243816735867594	0.0256947274309031
TraesCS4A03G0525200	4A:477446341-477448353|-	--	Plant peroxidase||Haem peroxidase||Haem peroxidase superfamily||Peroxidases heam-ligand binding site||Peroxidase, active site||Secretory peroxidase	28.670312634043	636.239930570515	-4.49848	9.79941319039262e-09	6.80752985070087e-06
TraesCS6B03G0121100	6B:35490000-35491990|+	--	Cytochrome P450||Cytochrome P450, E-class, group I||Cytochrome P450, conserved site||Cytochrome P450 superfamily	64.366546585413	1424.98965382398	-4.49839	4.51381107527533e-09	3.67059575419572e-06
TraesCS3D03G1053700	3D:579760836-579762295|-	--	Glycoside hydrolase family 17||Glycoside hydrolase superfamily	128.543924692689	2836.10908264941	-4.49482	3.54511180346517e-09	3.11083560754068e-06
TraesCS2D03G1308800	2D:648142998-648144499|+	--	Transferase||Chloramphenicol acetyltransferase-like domain superfamily	1.89313372310038	44.347493792925	-4.49354	4.203367577386e-05	0.00650777907686297
TraesCS2A03G1155700LC	2A:730902110-730903968|-	--	--	813.968492325375	17917.6384814182	-4.49264	2.66875219078925e-09	2.44644788458743e-06
TraesCS3A03G0346300	3A:147941292-147943396|-	--	Mitochondrial carrier protein||Mitochondrial substrate/solute carrier||Mitochondrial carrier domain superfamily	5.67940116930115	127.305815089018	-4.48871	3.06447997901028e-07	0.000122377347185746
TraesCS5B03G1231500	5B:673702767-673703768|-	--	PLAC8 motif-containing protein	1.89313372310038	44.1108486817919	-4.48584	4.92269387411129e-05	0.00736499056566421
TraesCS6B03G1084600	6B:666860875-666861812|-	--	Dehydrin||Dehydrin, conserved site	35.0229738773571	767.293748208439	-4.48104	8.09660038263102e-09	5.99958088352959e-06
TraesCS4A03G0525100	4A:477408733-477411443|-	--	Plant peroxidase||Haem peroxidase||Haem peroxidase superfamily||Peroxidases heam-ligand binding site||Peroxidase, active site||Secretory peroxidase	5.08552795995129	113.66113589726	-4.481	7.47220405915504e-07	0.000253276385618831
TraesCS2B03G0922600	2B:518419764-518421502|-	--	Cytochrome P450||Cytochrome P450, E-class, group I||Cytochrome P450, conserved site||Cytochrome P450 superfamily	9.93983573397875	219.18969387736	-4.47802	1.09554565929018e-07	5.24681795461845e-05
TraesCS4B03G0797800	4B:592329748-592330575|-	--	--	2.83970058465058	64.4434138546751	-4.47686	9.39194889826143e-06	0.0019868329009518
TraesCS5D03G0636700LC	5D:382910806-382911502|-	--	--	2.83970058465058	64.4434138546751	-4.47686	9.39194889826143e-06	0.0019868329009518
TraesCS6B03G0737200	6B:458323523-458323768|-	--	--	122.077655175023	2657.05980682229	-4.47512	4.21087011674532e-09	3.48773508593035e-06
TraesCS3A03G0348200	3A:149293123-149293578|-	--	Late embryogenesis abundant protein, LEA_2 subgroup||Water stress and hypersensitive response domain	14.9839650463921	328.246308975349	-4.47432	4.03396947354947e-08	2.27025674422797e-05
TraesCS2A03G0149000	2A:38852903-38854364|-	--	Lactate/malate dehydrogenase, N-terminal||L-lactate/malate dehydrogenase||L-lactate dehydrogenase||Lactate dehydrogenase/glycoside hydrolase, family 4, C-terminal||L-lactate dehydrogenase, active site||Lactate/malate dehydrogenase, C-terminal||NAD(P)-binding domain superfamily	3.78626744620077	84.8704009884111	-4.47381	3.05776360212308e-06	0.000797349969210512
TraesCS3A03G1145300	3A:716792426-716793455|-	--	Glutathione S-transferase, N-terminal||Glutathione S-transferase, C-terminal||Glutathione S-transferase, C-terminal-like||Thioredoxin-like superfamily||Glutathione S-transferase, C-terminal domain superfamily	4.75072456717166	105.728969443939	-4.47254	1.34857201514453e-06	0.000414930877462462
TraesCS3B03G1204200	3B:747740763-747741118|+	--	--	99.563320838068	2159.15117070363	-4.46955	4.47119008491261e-09	3.64750662706816e-06
TraesCS6A03G0899800	6A:584901480-584902134|+	--	Dehydrin||Dehydrin, conserved site	8.92270824433725	195.644501683474	-4.46785	1.53170218081283e-07	6.83272364136504e-05
TraesCS7B03G0851200LC	7B:571334840-571335368|+	--	--	3.78626744620077	84.5159525962953	-4.46779	3.35393075899902e-06	0.000861940818179748
TraesCS5D03G0515900LC	5D:332125344-332136614|+	--	--	121.125504568933	2621.92974571406	-4.46721	4.43004803798376e-09	3.62502949267653e-06
TraesCS6A03G0772500	6A:526671116-526672307|+	--	--	21.7710378156544	472.233	-4.46365	1.68065255931647e-08	1.09348994322747e-05
TraesCS5A03G1037400	5A:623029891-623030394|+	--	Cysteine-rich secretory protein-related||Venom allergen 5-like||CAP domain||Allergen V5/Tpx-1-related, conserved site||CAP superfamily	35.9695407389073	778.389860158969	-4.46341	8.96332259051049e-09	6.37614915798554e-06
TraesCS4A03G0736900LC	4A:592023256-592026415|+	--	--	7.57253489240153	165.837564988986	-4.46268	1.66561684916231e-07	7.30425746972696e-05
TraesCS1B03G1022800LC	1B:613323739-613325485|+	--	--	1.89551987632713	43.3958719840038	-4.46063	4.92269387411129e-05	0.00736499056566421
TraesCS7B03G1066900LC	7B:669478012-669479094|-	--	--	1.89313372310038	43.3144257056013	-4.45963	4.92269387411129e-05	0.00736499056566421
TraesCS5A03G0484700	5A:382976308-382977123|-	--	Cysteine-rich secretory protein-related||Venom allergen 5-like||CAP domain||Allergen V5/Tpx-1-related, conserved site||CAP superfamily	510.927851481577	10990.9254288812	-4.4593	3.40211012339633e-09	3.00512217389803e-06
TraesCS7D03G1015000	7D:550716763-550717435|+	--	Late embryogenesis abundant protein, LEA_1 subgroup	29.3435727080559	632.813195064761	-4.45734	1.33856670868963e-08	9.0859047127238e-06
TraesCS5D03G1074300	5D:527222299-527224298|-	--	Chalcone/stilbene synthase, N-terminal||Polyketide synthase, type III||Chalcone/stilbene synthase, C-terminal||Thiolase-like||Chalcone/stilbene synthase, active site	384.514256255137	8250.20791848803	-4.45546	3.58717788216456e-09	3.1169888333753e-06
TraesCS1D03G0182500	1D:64689133-64691812|+	--	LNK family	27.5070539874408	590.930211517855	-4.4514	1.45047090573749e-08	9.74628762757011e-06
TraesCS3B03G0032000LC	3B:11027962-11028537|+	--	--	12.7772772303026	275.707181130464	-4.45054	4.37213573264782e-08	2.42016091627949e-05
TraesCSU03G0521600	Un:316419545-316423113|-	--	--	2518.1668721834	53760.0521942436	-4.44861	3.35030643507613e-09	2.96919516485351e-06
TraesCS2A03G0404400	2A:167650763-167652205|+	--	Lateral organ boundaries, LOB	4.73283430775096	103.532041930462	-4.44759	1.69839271034939e-06	0.000495151081325468
TraesCS7D03G1244800	7D:626549846-626552930|-	--	Basic-leucine zipper domain||Plant bZIP transcription factors	4.73283430775096	103.532041930462	-4.44759	1.69839271034939e-06	0.000495151081325468
TraesCS4B03G1004700LC	4B:668940061-668942298|-	--	--	18.1301641073452	388.247162592704	-4.44355	3.22725811913962e-08	1.91737945626211e-05
TraesCS7D03G0396800	7D:129751373-129753146|-	--	NADH:flavin oxidoreductase/NADH oxidase, N-terminal||Aldolase-type TIM barrel	48.2749099390598	1029.20761777054	-4.44311	9.06428419800101e-09	6.43082035281583e-06
TraesCS5B03G1276900	5B:686968761-686969941|-	--	Serralysin-like metalloprotease, C-terminal||Leucine-rich repeat-containing N-terminal, plant-type||Leucine-rich repeat domain superfamily	11.3588023386023	244.039813121803	-4.44262	7.66703906250351e-08	3.9331910390643e-05
TraesCS5D03G1077800	5D:528518626-528519430|-	--	Zinc finger C2H2-type||Zinc finger C2H2 superfamily	10.4122354770521	223.845005265779	-4.44216	9.02164684714194e-08	4.4649619906189e-05
TraesCS3D03G1160600	3D:608196742-608197497|+	PR4B	Barwin domain||Barwin, conserved site||RlpA-like domain superfamily||Pathogenesis-related protein-4	736.147630337719	15620.7368495889	-4.43968	3.76367411723411e-09	3.24918351946075e-06
TraesCS1B03G0669600	1B:425328361-425331008|+	--	CCT domain	14.1985029232529	302.633791831231	-4.43418	5.24003755011798e-08	2.818210517882e-05
TraesCSU03G0153900LC	Un:129527381-129537928|+	--	--	1465.55791931204	30881.8600864055	-4.42971	3.79958977646253e-09	3.2626177982685e-06
TraesCS3D03G0748200	3D:445991311-445994833|-	--	Phospholipid/glycerol acyltransferase	2.83970058465058	62.3305150397678	-4.42886	1.18914328425913e-05	0.0023690505041745
TraesCS7B03G0679300	7B:458247749-458247999|-	--	--	12.5065153081917	265.645083289228	-4.42753	6.22615278629221e-08	3.29967298811394e-05
TraesCS4A03G1056900LC	4A:699738750-699739319|-	--	--	13.2519360617027	281.015542382682	-4.42593	6.23419997754322e-08	3.29967298811394e-05
TraesCS2A03G1151400	2A:729383942-729384730|-	--	--	8.20154814310646	174.74739121241	-4.42482	2.17455440658518e-07	9.17854641614973e-05
TraesCS2A03G1151500	2A:729437521-729438309|-	--	--	8.20154814310646	174.74739121241	-4.42482	2.17455440658518e-07	9.17854641614973e-05
TraesCS5B03G1191800	5B:660243040-660243749|+	--	Zinc finger C2H2-type||Zinc finger C2H2 superfamily	1.89313372310038	42.2579762981476	-4.42411	5.77951239982508e-05	0.00839117627553383
TraesCS6A03G0836700LC	6A:560390693-560397909|+	--	--	1.89313372310038	42.2579762981476	-4.42411	5.77951239982508e-05	0.00839117627553383
TraesCS2B03G1397500	2B:759911624-759914317|-	--	Zinc finger, RING-type||IBR domain||Zinc finger, RING/FYVE/PHD-type||Zinc finger, RING-type, conserved site||E3 ubiquitin ligase RBR family||TRIAD supradomain	17.9847703694536	379.409807697125	-4.42188	3.96609339286882e-08	2.24627404136239e-05
TraesCS6B03G0889300LC	6B:563944014-563944592|+	--	--	53.0077442468107	1110.32832723383	-4.41796	8.8040625157669e-09	6.29643891878278e-06
TraesCS1B03G0542400	1B:336203522-336204199|-	--	Uncharacterised protein family, basic secretory protein	1.21272135251775	27.831557589302	-4.41661	0.000243816735867594	0.0256947274309031
TraesCS5A03G1305200	5A:713320467-713330647|+	--	--	3982.41779535991	83000.1957318917	-4.41394	4.1678884938515e-09	3.48534775742892e-06
TraesCS3D03G0599400	3D:359530022-359531840|+	--	Protein kinase domain||Serine/threonine-protein kinase, active site||Protein kinase-like domain superfamily||Protein kinase, ATP binding site	3.78626744620077	81.3466043739342	-4.41273	4.44892455761035e-06	0.00107144350754519
TraesCS3D03G0760800	3D:454997539-455002534|-	--	Amino acid transporter, transmembrane domain	36.3470024102368	756.190708243872	-4.40667	1.46497815565027e-08	9.81903449249414e-06
TraesCS2A03G1077300	2A:708526084-708528713|-	--	Protein kinase domain||Legume lectin domain||Serine/threonine-protein kinase, active site||Protein kinase-like domain superfamily||Concanavalin A-like lectin/glucanase domain superfamily||Protein kinase, ATP binding site	2.83970058465058	61.2879	-4.40458	1.34085600040654e-05	0.00262426079727402
TraesCS6B03G0343700LC	6B:139262989-139263930|+	--	--	72.7112058422353	1504.20192840804	-4.40088	8.54935381849922e-09	6.21423875919033e-06
TraesCS1D03G0550600	1D:311946045-311948443|+	--	CCT domain	8.51910175395173	177.107732679224	-4.39017	1.88208705946559e-07	8.12403792852815e-05
TraesCS2B03G0615800LC	2B:285555672-285556058|+	--	--	510.164563196995	10448.633098848	-4.38846	5.31546346514689e-09	4.22009831536484e-06
TraesCS4A03G1234100LC	4A:749988786-749990106|-	--	--	1.89313372310038	41.2015268906939	-4.38769	8.02885194304251e-05	0.0107898062686449
TraesCS1D03G0456700	1D:255487869-255488529|+	--	Protein response to low sulfur	32.1832732927065	657.437231412231	-4.37969	2.02906130150109e-08	1.28568264320293e-05
TraesCS5D03G1072500	5D:526300141-526301193|-	--	--	26.3707014391641	538.440455092807	-4.37781	2.5118717858029e-08	1.55600365617364e-05
TraesCS1B03G0972200	1B:592222885-592224027|+	--	Short-chain dehydrogenase/reductase SDR||NAD(P)-binding domain superfamily	13.2519360617027	271.507497715599	-4.37629	8.53244807692201e-08	4.30267646313746e-05
TraesCS6B03G1084000	6B:666813852-666814796|+	--	Dehydrin||Dehydrin, conserved site	20.071953067628	408.070025454691	-4.36955	4.36804843302274e-08	2.42016091627949e-05
TraesCS7B03G1338700	7B:763001155-763005001|-	--	ABC transporter-like||AAA+ ATPase domain||ABC-2 type transporter||ABC transporter-like, conserved site||P-loop containing nucleoside triphosphate hydrolase||ABC transporter family G domain	8.17228935793481	166.549955703001	-4.36063	3.22989778260769e-07	0.000127645560368656
TraesCSU03G0042500	Un:25166170-25166659|-	--	Proteinase inhibitor I13, potato inhibitor I||Proteinase inhibitor I13, potato inhibitor I superfamily	326.565567135839	6560.55082028742	-4.36043	6.75706885345611e-09	5.19456970417277e-06
TraesCS2B03G1303700	2B:722388020-722389669|-	--	Transferase||Chloramphenicol acetyltransferase-like domain superfamily	5.67940116930115	116.209434819906	-4.35727	6.48069141811069e-07	0.000226875228700158
TraesCS2B03G1442400LC	2B:774875584-774875858|-	--	--	4.86184854870716	99.5214091944263	-4.35285	2.32943157032829e-06	0.000639957946138801
TraesCS3D03G0911800	3D:527829209-527834938|+	--	PAS domain||Protein kinase domain||Serine-threonine/tyrosine-protein kinase, catalytic domain||Serine/threonine-protein kinase, active site||Protein kinase-like domain superfamily||PAS domain superfamily	3.00500536303027	62.3305150397678	-4.35061	1.18914328425913e-05	0.0023690505041745
TraesCS7D03G0845900	7D:463130240-463131159|+	--	Cysteine-rich transmembrane CYSTM domain	1.89313372310038	40.1450774832403	-4.35033	9.50166342382029e-05	0.0124798805265303
TraesCS1D03G0604100	1D:344393372-344394618|+	--	Glycoside hydrolase, family 19, catalytic||Chitin-binding, type 1||Glycoside hydrolase, family 19||Chitin-binding, type 1, conserved site||Lysozyme-like domain superfamily||Endochitinase-like superfamily	8.09842708919275	163.749658155322	-4.34908	3.76184737125198e-07	0.000146284315561979
TraesCS7D03G1308100	7D:642788830-642790827|-	--	Protein kinase domain||Leucine-rich repeat||Leucine-rich repeat, typical subtype||Tyrosine-protein kinase, active site||Protein kinase-like domain superfamily||Protein kinase, ATP binding site||Leucine-rich repeat domain superfamily	1.98552844473799	41.8260216502424	-4.34478	6.802934527761e-05	0.00957652144921121
TraesCS7D03G0362800	7D:113184391-113185157|+	--	Cysteine-rich secretory protein-related||Venom allergen 5-like||CAP domain||Allergen V5/Tpx-1-related, conserved site||CAP superfamily	557.527881453063	11059.6706073245	-4.3424	7.08727735033689e-09	5.43276467234445e-06
TraesCSU03G0144700	Un:117417204-117417644|-	--	Germin||Cupin 1||RmlC-like cupin domain superfamily||RmlC-like jelly roll fold||Germin, manganese binding site	11.1776782821221	223.775840087662	-4.34055	1.60036290235248e-07	7.0955189839076e-05
TraesCS5D03G1074800	5D:527531795-527533534|+	--	O-methyltransferase domain||Plant methyltransferase dimerisation||O-methyltransferase COMT-type||S-adenosyl-L-methionine-dependent methyltransferase||Winged helix-like DNA-binding domain superfamily||Winged helix DNA-binding domain superfamily	734.535884562949	14500.8245667094	-4.33551	7.26047527853168e-09	5.52983945293557e-06
TraesCS4B03G0973000	4B:661000373-661006327|+	--	Zinc finger, RING-type||Zinc finger, RING/FYVE/PHD-type||RING-type zinc-finger, LisH dimerisation motif||E3 ubiquitin-protein ligase RFWD3	1.89313372310038	39.6420355074606	-4.33219	9.50166342382029e-05	0.0124798805265303
TraesCS7D03G0267400	7D:75812871-75813248|+	--	--	551.179075859573	10854.6634545178	-4.33192	7.61313401571855e-09	5.70522402057213e-06
TraesCS4D03G0007500	4D:2210061-2211185|+	--	Peptidase C1A, papain C-terminal||Cathepsin propeptide inhibitor domain (I29)||Cysteine peptidase, histidine active site||Cysteine peptidase, asparagine active site||Papain-like cysteine peptidase superfamily||Papain-like cysteine endopeptidase	12.3053692001525	244.378273024674	-4.33036	1.26825036994633e-07	5.91465854347697e-05
TraesCS2B03G0296700	2B:96934158-96936127|+	--	WRKY domain||WRKY domain superfamily	7.57253489240153	151.072265265878	-4.32825	3.70398456026038e-07	0.000144244514057673
TraesCS5A03G0711700	5A:502661462-502666813|+	--	--	2.83970058465058	58.104717409953	-4.32779	1.93925318231872e-05	0.00351675852423753
TraesCS5B03G0803000LC	5B:502154870-502155271|-	--	--	1.77255592013042	37.1403684753669	-4.32728	0.000160239070364784	0.0187726721170443
TraesCS5D03G0953200	5D:491848594-491849472|-	--	Dehydrin||Dehydrin, conserved site	13.2519360617027	261.981367521731	-4.32479	1.14151642299276e-07	5.39912980492106e-05
TraesCS1A03G0484600	1A:326087064-326087707|+	--	Protein response to low sulfur	36.2020900900452	705.38250420303	-4.31208	2.72571798118705e-08	1.65252847423059e-05
TraesCS3B03G1326200LC	3B:788816753-788817034|+	--	--	1.89313372310038	39.0886280757866	-4.31197	0.000112764799798596	0.0142152286801162
TraesCS2D03G0056100	2D:12355693-12359964|+	--	Terpene synthase, N-terminal domain||Terpene synthase, metal-binding domain||Terpenoid cyclases/protein prenyltransferase alpha-alpha toroid||Isoprenoid synthase domain superfamily||Terpene synthase, N-terminal domain superfamily	3.08471956826511	62.0669100343001	-4.30824	1.18914328425913e-05	0.0023690505041745
TraesCS5A03G1072200	5A:637075536-637077094|-	--	UDP-glucuronosyl/UDP-glucosyltransferase||UDP-glycosyltransferase family, conserved site	4.42115762594493	87.9262078271521	-4.30782	2.32868655304117e-06	0.000639957946138801
TraesCS4B03G0331800	4B:190726921-190728341|+	--	--	2.83970058465058	57.0482680024993	-4.30137	2.49918364172709e-05	0.00430137642243008
TraesCS2A03G0054300	2A:15286968-15288514|-	--	Oxoglutarate/iron-dependent dioxygenase||Non-haem dioxygenase N-terminal domain||Isopenicillin N synthase-like superfamily	67.4864477753811	1302.11517994341	-4.30015	1.71792264838973e-08	1.11231321768069e-05
TraesCS7D03G0664600LC	7D:312332823-312333988|+	--	--	10.4122354770521	202.838286231109	-4.30007	2.09422222752895e-07	8.8735305047593e-05
TraesCS2B03G1539200	2B:803272411-803274015|-	--	Plant peroxidase||Haem peroxidase||Haem peroxidase superfamily||Peroxidases heam-ligand binding site||Peroxidase, active site||Secretory peroxidase	1.89313372310038	38.7338168312245	-4.29886	0.000112764799798596	0.0142152286801162
TraesCS7D03G0134500	7D:33732331-33732917|+	--	Late embryogenesis abundant protein, LEA_1 subgroup	65.6989446415015	1265.88229203153	-4.29809	1.72376584789463e-08	1.11339413458685e-05
TraesCS2B03G0711400LC	2B:385739831-385742170|-	--	--	9.46566861550192	184.185907160421	-4.29677	2.61665443913218e-07	0.000106730693911758
TraesCS6B03G0343800LC	6B:139264244-139265443|-	--	--	20.8244709541042	401.657966975721	-4.29393	4.9738617337667e-08	2.69680356930814e-05
TraesCS1D03G0751400LC	1D:413642843-413643328|+	--	--	4.73283430775096	92.9675478559248	-4.2925	3.81467785171008e-06	0.000950143290123418
TraesCS5D03G0530000	5D:337976375-337977163|-	--	Chlorophyll A-B binding protein||Chlorophyll a/b binding domain superfamily	4.73283430775096	92.9675478559248	-4.2925	3.81467785171008e-06	0.000950143290123418
TraesCS6B03G0425500LC	6B:182403018-182403809|-	--	--	1.26664084898478	26.5363650944328	-4.2912	0.000305695076875518	0.0303487974348021
TraesCS6B03G1065000LC	6B:659080851-659095346|-	--	--	5.67940116930115	110.927187782638	-4.29023	9.286630378236e-07	0.000304336796031724
TraesCS2A03G1071100	2A:705956723-705957489|-	--	Pectinesterase inhibitor domain||Pla a 1-like||Invertase/pectin methylesterase inhibitor domain superfamily	12.3053692001525	237.584826337856	-4.28971	1.62649814546613e-07	7.19543358680838e-05
TraesCS4B03G0140700	4B:60641483-60642070|+	--	--	46.298989806969	881.159504518813	-4.27922	2.61033565303165e-08	1.58980168676421e-05
TraesCS1B03G0971800LC	1B:592093059-592093475|+	--	--	5.37900186828252	104.222411541928	-4.27704	1.57179280015252e-06	0.000466916979252434
TraesCS5B03G0606500	5B:410577971-410578620|+	--	--	18.9313372310038	359.471535213243	-4.27053	9.28344065480564e-08	4.58601968347399e-05
TraesCS6B03G1024000	6B:642033656-642034938|+	--	Oxoglutarate/iron-dependent dioxygenase||Non-haem dioxygenase N-terminal domain||Isopenicillin N synthase-like superfamily	1.92841008576573	38.5585818357218	-4.26735	0.000112764799798596	0.0142152286801162
TraesCS7B03G0905900	7B:597209877-597211091|+	--	Late embryogenesis abundant protein, LEA_1 subgroup	6.62596803085134	126.773928894443	-4.26477	7.20341163593266e-07	0.000246041240461126
TraesCS1D03G0028000	1D:7248635-7250357|+	--	NADH:flavin oxidoreductase/NADH oxidase, N-terminal||Aldolase-type TIM barrel	140.754111000259	2645.30165387403	-4.26355	1.47882648609817e-08	9.86229383578871e-06
TraesCS2A03G1323900	2A:775486662-775487656|-	--	Glutathione S-transferase, N-terminal||Glutathione S-transferase, C-terminal||Glutathione S-transferase, C-terminal-like||Thioredoxin-like superfamily||Glutathione S-transferase, C-terminal domain superfamily||Glutathione Transferase family	3.05127107171077	59.5228949345438	-4.26309	1.71225012667311e-05	0.0031807788564855
TraesCS7B03G1027800	7B:653719187-653721986|+	--	Ureide permease||Ureide permease, plant	4.83445500120318	92.9675478559248	-4.26264	3.81467785171008e-06	0.000950143290123418
TraesCS7B03G1338800	7B:763048335-763050600|-	--	ABC transporter-like||AAA+ ATPase domain||ABC-2 type transporter||ABC transporter-like, conserved site||P-loop containing nucleoside triphosphate hydrolase||ABC transporter family G domain	1.29337925756711	26.5124260011691	-4.26247	0.000305695076875518	0.0303487974348021
TraesCS2A03G1018500	2A:683679093-683680017|-	--	--	174.168302525235	3266.18316288507	-4.26065	1.41580253692884e-08	9.58577372464818e-06
TraesCS5B03G1167200	5B:650251700-650252875|-	--	Proteinase inhibitor I12, Bowman-Birk||Bowman-Birk type wound-induced proteinase inhibitor WIP1	17.0382035079035	321.160619865922	-4.25895	1.1644544357207e-07	5.48816016383135e-05
TraesCS7B03G1338200LC	7B:762862630-762869334|+	--	--	21.6537125956595	407.319383572178	-4.25812	6.18956693447571e-08	3.28910134549948e-05
TraesCS3D03G0724300	3D:434451064-434451559|-	--	--	7.57253489240153	143.677119413702	-4.2559	5.5027443490267e-07	0.000201083846924159
TraesCS6D03G0018400	6D:3461732-3462531|-	--	Rhodanese-like domain||Rhodanese-like domain superfamily	7.57253489240153	143.677119413702	-4.2559	5.5027443490267e-07	0.000201083846924159
TraesCS5B03G1221700	5B:670913246-670915251|+	--	Glycoside hydrolase, family 5||Glycoside hydrolase superfamily	8.51910175395173	161.183587544865	-4.25435	4.16971030569458e-07	0.000160044880740588
TraesCS1D03G0601300	1D:343402774-343403935|-	--	Casparian strip membrane protein||Casparian strip membrane protein domain	27.0192200282116	504.815069466969	-4.24992	5.91873075802481e-08	3.16279148128281e-05
TraesCS7A03G0934400	7A:566216685-566218252|-	--	Germin||Cupin 1||RmlC-like cupin domain superfamily||RmlC-like jelly roll fold||Germin, manganese binding site	13.4365346431437	252.146621956406	-4.24984	1.5935362841796e-07	7.08486231946251e-05
TraesCS7D03G0364900	7D:113805523-113806427|-	--	Zinc finger C2H2-type||Zinc finger C2H2 superfamily	5.67940116930115	107.757839560276	-4.24846	1.1597042524274e-06	0.000363101768048748
TraesCS7B03G0993300	7B:639064998-639066654|+	--	UDP-glucuronosyl/UDP-glucosyltransferase||UDP-glycosyltransferase family, conserved site	1.89313372310038	37.3784681714512	-4.24764	0.000134219518227546	0.0161791227665523
TraesCS7D03G1046300	7D:562776233-562782540|-	--	Protein of unknown function DUF1262	5.00640105969009	95.0209939777513	-4.24496	3.22766687120434e-06	0.000834314355196191
TraesCS4B03G0140800	4B:60647469-60648160|+	--	--	11.3588023386023	211.391547361246	-4.23553	2.66212165227941e-07	0.000108174363525116
TraesCS2A03G1279900	2A:763417968-763426766|-	--	Armadillo-type fold||Armadillo-like helical	1.89313372310038	37.0464218643315	-4.23481	0.000160239070364784	0.0187726721170443
TraesCS1B03G1017400LC	1B:611287218-611288402|-	--	--	1.89313372310038	36.9757292608792	-4.23206	0.000160239070364784	0.0187726721170443
TraesCS2A03G0259900LC	2A:79504867-79506771|+	--	--	1.89313372310038	36.9757292608792	-4.23206	0.000160239070364784	0.0187726721170443
TraesCS2B03G0692900LC	2B:372786208-372790894|-	--	--	1.89313372310038	36.9757292608792	-4.23206	0.000160239070364784	0.0187726721170443
TraesCS6A03G0799500	6A:540349240-540351830|+	--	Multicopper oxidase, type 1||Multicopper oxidase, copper-binding site||Cupredoxin||Multicopper oxidase, type 2||Multicopper oxidase, type 3||Laccase||Multicopper oxidases, conserved site||Laccase, second cupredoxin domain||Laccase, first cupredoxin domain||Laccase, third cupredoxin domain	1.89313372310038	36.9757292608792	-4.23206	0.000160239070364784	0.0187726721170443
TraesCS1A03G0749200	1A:496976551-496977886|-	--	WRKY domain||WRKY domain superfamily	2.83970058465058	54.2576011991895	-4.22917	3.24175311964849e-05	0.00533808680368785
TraesCS5D03G1146600	5D:547208947-547210147|+	--	Leucine-rich repeat||Serralysin-like metalloprotease, C-terminal||Leucine-rich repeat-containing N-terminal, plant-type||Leucine-rich repeat domain superfamily	181.740837417637	3321.4769370344	-4.22351	1.81347532661412e-08	1.16289105319131e-05
TraesCS3A03G0828900	3A:596349255-596354321|-	--	Amino acid transporter, transmembrane domain	29.6473693864372	543.138682744619	-4.22214	5.27650371112602e-08	2.83211293758547e-05
TraesCS7B03G1342500	7B:763839549-763845028|-	--	ABC transporter-like||AAA+ ATPase domain||ABC transporter-like, conserved site||P-loop containing nucleoside triphosphate hydrolase||ABC transporter family G domain	2.84000482874786	53.8859777390704	-4.21913	3.70145266171974e-05	0.00588087857081809
TraesCS1A03G0046900	1A:11495332-11497221|+	--	Cytochrome P450||Cytochrome P450, E-class, group I||Cytochrome P450, conserved site||Cytochrome P450 superfamily	2.83970058465058	53.8789197801382	-4.21909	3.70145266171974e-05	0.00588087857081809
TraesCS1B03G0755500	1B:481033421-481036309|-	--	Protein kinase domain||S-locus glycoprotein domain||Bulb-type lectin domain||PAN/Apple domain||Serine/threonine-protein kinase, active site||Protein kinase-like domain superfamily||Protein kinase, ATP binding site||S-receptor-like serine/threonine-protein kinase||Bulb-type lectin domain superfamily	2.83970058465058	53.8789197801382	-4.21909	3.70145266171974e-05	0.00588087857081809
TraesCS2B03G0584300	2B:253724527-253728606|-	--	Protein kinase domain||Serine-threonine/tyrosine-protein kinase, catalytic domain||Gnk2-homologous domain||Protein kinase-like domain superfamily||Protein kinase, ATP binding site||Gnk2-homologous domain superfamily||Serine/threonine-protein kinase, active site	2.83970058465058	53.7757637002659	-4.21633	3.70145266171974e-05	0.00588087857081809
TraesCS7A03G1349200	7A:733407088-733408997|-	--	--	10.4122354770521	191.217342749118	-4.21501	3.50448840049755e-07	0.000137479018487754
TraesCS1B03G0877900LC	1B:551365149-551365445|+	--	--	55.5015661031732	1009.32617102889	-4.21421	3.32725248388259e-08	1.92951711434896e-05
TraesCS1B03G0878000LC	1B:551365149-551365445|+	--	--	55.5015661031732	1009.32617102889	-4.21421	3.32725248388259e-08	1.92951711434896e-05
TraesCS6B03G0318600LC	6B:129553597-129553893|-	--	--	55.5015661031732	1009.32617102889	-4.21421	3.32725248388259e-08	1.92951711434896e-05
TraesCS7D03G0267800	7D:75820892-75821188|+	--	--	55.5015661031732	1009.32617102889	-4.21421	3.32725248388259e-08	1.92951711434896e-05
TraesCS7D03G0267900	7D:75861518-75861814|+	--	--	55.5015661031732	1009.32617102889	-4.21421	3.32725248388259e-08	1.92951711434896e-05
TraesCSU03G0153500LC	Un:129507712-129508008|+	--	--	55.5015661031732	1009.32617102889	-4.21421	3.32725248388259e-08	1.92951711434896e-05
TraesCSU03G0527000	Un:320918064-320918360|-	--	--	55.5015661031732	1009.32617102889	-4.21421	3.32725248388259e-08	1.92951711434896e-05
TraesCSU03G0527500	Un:321152763-321153059|-	--	--	55.5015661031732	1009.32617102889	-4.21421	3.32725248388259e-08	1.92951711434896e-05
TraesCSU03G0535400	Un:327205039-327205335|-	--	--	55.5015661031732	1009.32617102889	-4.21421	3.32725248388259e-08	1.92951711434896e-05
TraesCS7B03G0037200	7B:13070163-13074003|-	--	Peptidase S8/S53 domain||Peptidase S8 propeptide/proteinase inhibitor I9||Peptidase S8, subtilisin-related||Peptidase S8, subtilisin, His-active site||Peptidase S8, subtilisin, Ser-active site||Cucumisin-like catalytic domain||Peptidase S8/S53 domain superfamily||Peptidase S8 propeptide/proteinase inhibitor I9 superfamily||Subtilisin-like protease, fibronectin type-III domain	3.78626744620077	70.8131705983802	-4.21299	1.34873195408285e-05	0.00263580759026478
TraesCS4A03G0596000	4A:530297158-530307621|+	--	Protein kinase domain||Serine/threonine-protein kinase, active site||Protein kinase-like domain superfamily||Protein kinase, ATP binding site	3.78626744620077	70.7821102993973	-4.21235	1.34873195408285e-05	0.00263580759026478
TraesCS6D03G0772700	6D:457078100-457079055|+	--	Dehydrin||Dehydrin, conserved site	78.371000533592	1421.28330463843	-4.21112	2.52234579177706e-08	1.55754852642234e-05
TraesCS2B03G1204800LC	2B:681972075-681972462|+	--	--	10.1042682533011	184.878646304396	-4.20919	4.57994553076699e-07	0.000173543504231165
TraesCS2A03G1008200	2A:680727499-680728717|-	--	Cysteine peptidase, cysteine active site||Peptidase C1A, papain C-terminal||Cathepsin propeptide inhibitor domain (I29)||Cysteine peptidase, histidine active site||Papain-like cysteine peptidase superfamily||Papain-like cysteine endopeptidase	14.1985029232529	258.442797300255	-4.20655	2.09563810841144e-07	8.8735305047593e-05
TraesCS1B03G0768700	1B:490536867-490537610|+	--	Proteinase inhibitor I12, Bowman-Birk||Bowman-Birk type wound-induced proteinase inhibitor WIP1	145.77129667873	2630.72803906453	-4.20509	2.11754747939234e-08	1.33540653806785e-05
TraesCS4D03G0499400	4D:350883461-350884408|-	--	Conserved hypothetical protein CHP01589, plant	62.4734128623127	1121.55221219153	-4.19595	3.45589583116199e-08	1.98256940198015e-05
TraesCS3B03G0424100LC	3B:193150295-193150783|-	--	--	32.1832732927065	577.647746981674	-4.19306	6.45947559874607e-08	3.37207379788944e-05
TraesCS1B03G1223600	1B:679814412-679816212|+	--	FAD linked oxidase, N-terminal||Berberine/berberine-like||FAD-binding domain, PCMH-type||FAD-binding, type PCMH, subdomain 1||FAD-binding, type PCMH, subdomain 2||FAD-binding, type PCMH-like superfamily	30.2901395696061	543.279156586917	-4.19169	6.82221710368556e-08	3.54065104003727e-05
TraesCS5A03G0125600	5A:47105924-47106953|+	--	Zinc finger, RING-type||Zinc finger, RING/FYVE/PHD-type||Zinc finger, RING-type, conserved site||RING-type zinc-finger, LisH dimerisation motif	10.4122354770521	188.047994526757	-4.19091	4.00273463873668e-07	0.000154525252131606
TraesCS1D03G0084100	1D:21698411-21699595|+	--	Zinc finger C2H2-type||Zinc finger C2H2 superfamily	1.89313372310038	35.9192798534255	-4.19038	0.000191900543227432	0.0215352980228054
TraesCS2A03G1113900	2A:719511560-719512427|-	--	SUI1 domain||Eukaryotic translation initiation factor SUI1||SUI1 domain superfamily	1.89313372310038	35.9192798534255	-4.19038	0.000191900543227432	0.0215352980228054
TraesCS7D03G0109900	7D:26476823-26477107|+	--	Late embryogenesis abundant protein, LEA_1 subgroup	7.57253489240153	136.281973561526	-4.17973	8.30834945993459e-07	0.000279135428454931
TraesCS4B03G0749800LC	4B:566127905-566129508|-	--	--	1.30417405048839	25.1841142298048	-4.17774	0.000488130947575076	0.0435497697575676
TraesCS6A03G0731300	6A:504085341-504086985|+	--	D-isomer specific 2-hydroxyacid dehydrogenase, catalytic domain||D-isomer specific 2-hydroxyacid dehydrogenase, NAD-binding domain||D-isomer specific 2-hydroxyacid dehydrogenase, NAD-binding domain conserved site||NAD(P)-binding domain superfamily	2.02387283637818	37.8924700433991	-4.17677	0.000134219518227546	0.0161791227665523
TraesCS4B03G0073600	4B:27486875-27487549|+	--	Germin||Cupin 1||RmlC-like cupin domain superfamily||RmlC-like jelly roll fold||Germin, manganese binding site	221.496645602745	3914.43613042875	-4.17526	2.30896911649818e-08	1.44248384430223e-05
TraesCSU03G0144800	Un:117428882-117429774|-	--	Germin||Cupin 1||RmlC-like cupin domain superfamily||RmlC-like jelly roll fold||Germin, manganese binding site	17.8663033076627	317.085541879432	-4.17256	1.29760363800383e-07	5.97838940369435e-05
TraesCS3B03G0721400LC	3B:462237317-462238531|+	--	--	9.76427098338718	173.864855906662	-4.1694	4.18284541216842e-07	0.000160318368125007
TraesCS3B03G1393500LC	3B:809689454-809690839|-	--	--	20.2985370075009	358.908810315825	-4.16832	1.32976298204085e-07	6.0533715544235e-05
TraesCS5D03G0057100LC	5D:19118383-19138313|+	--	--	7188.86314808173	126249.424892786	-4.16693	1.98198503717031e-08	1.26184803941659e-05
TraesCS1A03G0454500	1A:302674306-302674892|+	--	RlpA-like domain superfamily||Kiwellin-like	2.83970058465058	51.9482327256082	-4.16657	4.85125899875822e-05	0.0073072944692758
TraesCS1A03G0047800	1A:11579525-11580104|-	--	Proteinase inhibitor I12, Bowman-Birk||Bowman-Birk type proteinase inhibitor	9.46566861550192	167.975455785137	-4.16395	5.60297264231928e-07	0.000202875800659258
TraesCS4D03G0287600	4D:127386777-127387867|+	--	Glycoside hydrolase family 18, catalytic domain||Glycoside hydrolase superfamily	153.528807475889	2688.89300845709	-4.1619	2.78212330547427e-08	1.67909324200977e-05
TraesCS3B03G0902600	3B:581356658-581358596|-	--	Tyrosinase copper-binding domain||Uncharacterised domain, di-copper centre||Polyphenol oxidase||Polyphenol oxidase, central domain||Polyphenol oxidase, C-terminal	10.4249463588662	184.252716405247	-4.15978	4.79221663290758e-07	0.000178793246013206
TraesCS2D03G1238200	2D:632694556-632700435|+	--	Armadillo-type fold	5.94565620460917	105.944647284034	-4.15931	3.10242332426524e-06	0.000805276056182355
TraesCS7B03G0356600LC	7B:171960575-171961440|+	--	--	3.78179398814275	67.9873015446754	-4.15599	1.86624191332842e-05	0.00340985406027048
TraesCSU03G0153600LC	Un:129507933-129524175|-	--	--	574.351747610128	10003.2722054864	-4.15468	2.31781077987604e-08	1.44462430756947e-05
TraesCS2A03G1151600	2A:729502832-729503930|-	--	--	102.864328269111	1791.73247879606	-4.15346	3.41770443547817e-08	1.96912923371092e-05
TraesCS1A03G0255700LC	1A:103512575-103514551|+	--	--	6.62596803085134	117.26588422736	-4.15241	1.40645219734326e-06	0.000424898287840643
TraesCS2D03G1302200	2D:647276131-647277877|-	--	Plant peroxidase||Haem peroxidase||Haem peroxidase superfamily||Peroxidases heam-ligand binding site||Peroxidase, active site||Secretory peroxidase	8.59515575088948	151.195557734701	-4.14949	7.09157548007153e-07	0.000244728159775405
TraesCS2D03G0412100	2D:147775808-147778124|-	--	Protein kinase domain||Protein kinase-like domain superfamily	11.3533164163044	198.886106731183	-4.1483	4.36158813426858e-07	0.000166213892956784
TraesCS3D03G1145400	3D:604172078-604172773|-	--	ABA/WDS induced protein	1.89313372310038	34.8628304459718	-4.14746	0.000230560867986034	0.0246919801978269
TraesCS4A03G0158200	4A:78136530-78136913|-	--	--	1.89313372310038	34.8628304459718	-4.14746	0.000230560867986034	0.0246919801978269
TraesCS6B03G0312400	6B:126538165-126540234|-	--	Cytochrome P450||Cytochrome P450, E-class, group I||Cytochrome P450, conserved site||Cytochrome P450 superfamily	2.83970058465058	51.2313994260965	-4.14657	4.85125899875822e-05	0.0073072944692758
TraesCS3D03G0762300	3D:455535431-455541218|-	--	Haem-binding uptake, Tiki superfamily, ChaN||Protein RETICULATA-related	8.97057229638266	156.870381253795	-4.14181	1.03254026470269e-06	0.000329080574685889
TraesCS3A03G0862900	3A:611511771-611516932|+	--	Regulator of chromosome condensation, RCC1||Regulator of chromosome condensation 1/beta-lactamase-inhibitor protein II	21.0838632993567	364.052586670676	-4.13441	1.66469856192955e-07	7.30425746972696e-05
TraesCS6B03G0674100LC	6B:400852551-400852877|+	--	--	23.7648277623104	410.044287044196	-4.13426	1.14119562832092e-07	5.39912980492106e-05
TraesCS3B03G0757500	3B:485392168-485393363|-	--	Glycoside hydrolase, family 19, catalytic||Chitin-binding, type 1||Glycoside hydrolase, family 19||Chitin-binding, type 1, conserved site||Lysozyme-like domain superfamily||Endochitinase-like superfamily	613.283262073551	10529.3566128102	-4.13403	2.60467652084138e-08	1.58980168676421e-05
TraesCS7D03G0579800	7D:233573782-233574030|+	--	--	727.281950833407	12458.3766621869	-4.13081	2.63787872585933e-08	1.60291692234677e-05
TraesCS2B03G0842900LC	2B:471089485-471090591|-	--	--	3.85309467933769	67.9793292017314	-4.12974	1.86624191332842e-05	0.00340985406027048
TraesCS5A03G0109900LC	5A:41291587-41296539|+	--	--	1.39293420853102	25.8209922512239	-4.12674	0.00038525294388571	0.0365280505507327
TraesCS2D03G0055500	2D:12055658-12057155|-	--	Oxoglutarate/iron-dependent dioxygenase||Non-haem dioxygenase N-terminal domain||Isopenicillin N synthase-like superfamily	5.67940116930115	98.5106046662423	-4.11917	2.52483925669632e-06	0.000685174079467254
TraesCS5B03G0607600	5B:411305205-411306998|-	--	Cytochrome P450||Cytochrome P450, E-class, group I||Cytochrome P450, conserved site||Cytochrome P450 superfamily	1.89313372310038	34.1428600942122	-4.11746	0.000277936388805081	0.0286817450977344
TraesCS1B03G1255400	1B:688133434-688134224|+	--	EF-hand domain||EF-hand domain pair||EF-Hand 1, calcium-binding site	8.92629964445602	153.270640320327	-4.11538	1.21023139497678e-06	0.000376923613837675
TraesCS3B03G0252300	3B:87253276-87259251|+	--	Cellulose synthase||Nucleotide-diphospho-sugar transferases	35.9695407389073	611.128044163193	-4.11446	7.8059135246477e-08	3.98909098052686e-05
TraesCS4A03G0749800	4A:595330121-595330810|+	--	Thaumatin family||Thaumatin, conserved site||Osmotin/thaumatin-like superfamily	589.88944416855	9971.08841720384	-4.11153	3.01271472062285e-08	1.79669337024552e-05
TraesCS3B03G1073600	3B:687983390-687986994|-	--	Short-chain dehydrogenase/reductase SDR||NAD(P)-binding domain superfamily	40.7478683949652	688.775045290897	-4.10762	7.73255662474411e-08	3.95918772594384e-05
TraesCS4B03G0639000	4B:487833633-487835050|-	--	--	20.269898260154	342.896262491712	-4.10452	2.01763380352303e-07	8.62538451006095e-05
TraesCS3D03G0791200	3D:469724106-469728778|+	--	Regulator of chromosome condensation, RCC1||Regulator of chromosome condensation 1/beta-lactamase-inhibitor protein II	22.6797427637976	383.163369095496	-4.10353	1.49464631115696e-07	6.734997465612e-05
TraesCS5A03G1142000	5A:659024227-659026252|+	--	UDP-glucuronosyl/UDP-glucosyltransferase	257.466186341652	4328.92906916689	-4.10348	3.44488307631394e-08	1.98051079620152e-05
TraesCS1B03G0142500LC	1B:46868508-46874700|-	--	--	1.89313372310038	33.8063810385181	-4.10323	0.000277936388805081	0.0286817450977344
TraesCS1D03G0934700	1D:470238355-470238912|+	--	EF-hand domain||EF-hand domain pair||EF-Hand 1, calcium-binding site	1.89313372310038	33.8063810385181	-4.10323	0.000277936388805081	0.0286817450977344
TraesCS6D03G0855600	6D:478235480-478238503|+	--	C2 domain||Phosphoribosyltransferase C-terminal||C2 domain superfamily	1.89313372310038	33.8063810385181	-4.10323	0.000277936388805081	0.0286817450977344
TraesCS7D03G0162900	7D:42659570-42660367|+	--	Uncharacterized protein At4g22758-like	1.89313372310038	33.8063810385181	-4.10323	0.000277936388805081	0.0286817450977344
TraesCS7B03G0583200	7B:382068394-382070197|+	--	Fungal lipase-like domain||Alpha/Beta hydrolase fold	3.78626744620077	65.4432575666931	-4.09942	2.33109921117103e-05	0.00407232498737382
TraesCS6B03G0223800	6B:76307572-76308118|+	--	Proteinase inhibitor I13, potato inhibitor I||Proteinase inhibitor I13, potato inhibitor I superfamily	9.46566861550192	160.580309932961	-4.09904	8.38711992006674e-07	0.000281073883150377
TraesCS2A03G0215700	2A:62536793-62539015|+	--	WRKY domain||WRKY domain superfamily	8.65497249364842	146.846467636063	-4.09756	9.34930282863577e-07	0.000306014726695323
TraesCS7B03G1302900LC	7B:753892870-753893620|+	--	--	162.974001220393	2727.91734099136	-4.09662	4.02254519802526e-08	2.26861343979962e-05
TraesCS3B03G1335500	3B:791751251-791752345|-	--	Glutathione S-transferase, N-terminal||Glutathione S-transferase, C-terminal||Glutathione S-transferase, C-terminal-like||Thioredoxin-like superfamily||Glutathione S-transferase, C-terminal domain superfamily	224.167412739749	3750.69602894192	-4.09633	3.67653206743375e-08	2.09562327843724e-05
TraesCS3A03G1134200	3A:714332814-714334500|-	--	Glycoside hydrolase family 17||Glycoside hydrolase superfamily	10.4122354770521	175.634488277483	-4.09245	7.27301548856504e-07	0.000247784113886285
TraesCS1D03G0473800	1D:257355324-257358884|-	--	Cys/Met metabolism, pyridoxal phosphate-dependent enzyme||Pyridoxal phosphate-dependent transferase, major domain||Pyridoxal phosphate-dependent transferase, small domain||Pyridoxal phosphate-dependent transferase	52.1053989741172	870.200672427915	-4.09115	6.71011005185127e-08	3.48925722696266e-05
TraesCS5B03G0814700LC	5B:510682892-510683206|+	--	--	2.16504890842552	37.9655468305375	-4.08779	0.000134219518227546	0.0161791227665523
TraesCS7D03G0974300	7D:532999246-533012171|-	--	Zinc/iron permease||Zinc/iron permease, fungal/plant	5.67940116930115	96.382864487916	-4.08771	2.97199842013582e-06	0.000781093890202394
TraesCS3A03G0092600	3A:25242452-25243426|-	--	Proteinase inhibitor I12, Bowman-Birk||Bowman-Birk type proteinase inhibitor	6.62596803085134	111.983637190091	-4.08598	1.99973475551129e-06	0.00056749919508531
TraesCS6D03G0223000	6D:88929454-88930284|+	--	Fasciclin-like arabinogalactan protein||FAS1 domain superfamily	27.4504389849556	457.442593427448	-4.08505	1.41167184482934e-07	6.39350732303353e-05
TraesCS5A03G1102200	5A:647214889-647215778|+	--	EF-hand domain||EF-hand domain pair||EF-Hand 1, calcium-binding site	6.62596803085134	110.927187782638	-4.07232	2.14877539547255e-06	0.000598962721521691
TraesCS3A03G0821900LC	3A:593713789-593713983|-	--	--	13.1093712083228	217.408584871352	-4.07133	5.63543890720161e-07	0.000202875800659258
TraesCS3A03G1000800LC	3A:673057501-673057695|+	--	--	13.1093712083228	217.408584871352	-4.07133	5.63543890720161e-07	0.000202875800659258
TraesCS6D03G0668400LC	6D:410644412-410644606|+	--	--	13.1093712083228	217.408584871352	-4.07133	5.63543890720161e-07	0.000202875800659258
TraesCS7D03G0279600LC	7D:78952929-78953123|+	--	--	13.1093712083228	217.408584871352	-4.07133	5.63543890720161e-07	0.000202875800659258
TraesCSU03G0167700LC	Un:146020648-146020842|+	--	--	13.1093712083228	217.408584871352	-4.07133	5.63543890720161e-07	0.000202875800659258
TraesCS4A03G1006500	4A:680317173-680317790|-	--	--	2.83970058465058	48.5966727428698	-4.07059	7.38123341637565e-05	0.0102124029817973
TraesCS3D03G0552600	3D:323359394-323360120|+	--	--	2.83970058465058	48.5188139200641	-4.06828	7.38123341637565e-05	0.0102124029817973
TraesCS2B03G1193600	2B:676376110-676377676|-	--	U box domain||Armadillo-like helical||Zinc finger, RING/FYVE/PHD-type||Armadillo-type fold	4.73283430775096	79.2337055590268	-4.06222	1.33653261570662e-05	0.00261771982794345
TraesCS6B03G1170500	6B:697731047-697733248|+	--	Cytochrome P450||Cytochrome P450, E-class, group I||Cytochrome P450, conserved site||Cytochrome P450 superfamily	51.5272108420318	843.103884841155	-4.06158	8.93363068919674e-08	4.42961955882923e-05
TraesCS6A03G0223000	6A:67327133-67329473|-	--	Cytochrome P450||Cytochrome P450, E-class, group I||Cytochrome P450, conserved site||Cytochrome P450 superfamily	29.4501997783807	481.593442770421	-4.05826	1.51497413043058e-07	6.80974996400425e-05
TraesCS2B03G1470200LC	2B:782927870-782929145|+	--	--	1.89313372310038	32.7499316310644	-4.05759	0.000336207055238845	0.0328566828490472
TraesCS4A03G0158300	4A:78137077-78138960|-	--	--	47.3283430775096	772.264516848648	-4.0573	1.0015342167123e-07	4.85762304818496e-05
TraesCS4D03G0629500	4D:434818064-434821716|-	--	Aminotransferase, class I/classII||Pyridoxal phosphate-dependent transferase, major domain||Pyridoxal phosphate-dependent transferase, small domain||Pyridoxal phosphate-dependent transferase||LL-diaminopimelate aminotransferase/aminotransferase ALD1	18.9313372310038	309.933301788737	-4.05669	3.35821826536062e-07	0.000132324712624461
TraesCS2B03G1284900	2B:715717757-715721235|-	--	Protein kinase domain||S-locus glycoprotein domain||Serine-threonine/tyrosine-protein kinase, catalytic domain||Bulb-type lectin domain||PAN/Apple domain||Serine/threonine-protein kinase, active site||Protein kinase-like domain superfamily||Protein kinase, ATP binding site||S-receptor-like serine/threonine-protein kinase||Bulb-type lectin domain superfamily	3.78626744620077	63.3869644472215	-4.05345	2.92623563482273e-05	0.00489713060191538
TraesCS7A03G0109700	7A:23894161-23895254|-	--	Glutathione S-transferase, N-terminal||Glutathione S-transferase, C-terminal-like||Thioredoxin-like superfamily||Glutathione S-transferase, C-terminal domain superfamily	3.78626744620077	63.3869644472215	-4.05345	2.92623563482273e-05	0.00489713060191538
TraesCS7B03G0178500	7B:73908808-73910054|-	--	Zinc finger C2H2-type||Zinc finger C2H2 superfamily	5.67940116930115	94.0239972633785	-4.05201	3.50770880685845e-06	0.000896280077890383
TraesCS5A03G0666600	5A:481195262-481196297|-	--	--	9.46566861550192	155.298062895693	-4.05083	1.08836341628692e-06	0.000344123054932736
TraesCS2B03G0533500	2B:218879298-218882475|-	--	Vacuolar protein sorting-associated protein 62	7.69293322853004	126.197026056451	-4.04653	1.64566644747664e-06	0.0004843066809879
TraesCS1D03G1008000	1D:488221159-488223159|+	--	AAA+ ATPase domain||ATPase, AAA-type, core||ATPase, AAA-type, conserved site||AAA-type ATPase, N-terminal domain||P-loop containing nucleoside triphosphate hydrolase	4.73283430775096	78.1772561515731	-4.04289	1.47086188815987e-05	0.00282889053558418
TraesCS7D03G1251700	7D:629469144-629471138|-	--	Rhodanese-like domain||Rhodanese-like domain superfamily	4.73283430775096	78.1772561515731	-4.04289	1.47086188815987e-05	0.00282889053558418
TraesCS2A03G0222200	2A:64653668-64655247|-	--	Plant peroxidase||Haem peroxidase||Haem peroxidase superfamily||Peroxidases heam-ligand binding site||Peroxidase, active site||Secretory peroxidase	115.481157109123	1861.75833230951	-4.04205	6.25889712966033e-08	3.30618494714493e-05
TraesCS1B03G1249600	1B:686053049-686055960|+	--	Protein kinase domain||Leucine-rich repeat||Serine/threonine-protein kinase, active site||Protein kinase-like domain superfamily||Protein kinase, ATP binding site||Leucine-rich repeat domain superfamily	2.83970058465058	47.5402233354161	-4.03896	8.52291261159916e-05	0.0113451705003503
TraesCS2D03G0983100	2D:550303087-550303407|-	--	--	12.3053692001525	199.545723347759	-4.03813	7.07073455089891e-07	0.000244325019274326
TraesCS5A03G1250900LC	5A:694341370-694349175|-	--	--	10.4122354770521	169.078564079697	-4.03761	9.70058553496828e-07	0.000313664023916138
TraesCS5B03G1087700LC	5B:619612270-619612788|-	--	--	54.9107626437586	883.190082116478	-4.03704	9.34885904259712e-08	4.60979970093015e-05
TraesCS1A03G0187800	1A:62091394-62094313|+	--	LNK family	42.5388937672734	684.477735479436	-4.03673	1.19350999475856e-07	5.59544334273804e-05
TraesCS3B03G0950000	3B:611645806-611650986|-	--	Amino acid transporter, transmembrane domain	25.8226137736946	415.079957409383	-4.03267	1.88098670834134e-07	8.12403792852815e-05
TraesCS6D03G0634000LC	6D:392222280-392223007|+	--	--	56.7940116930115	910.149642095406	-4.03188	9.64405304442242e-08	4.7291315995039e-05
TraesCS2A03G1221700	2A:750840250-750842646|-	--	Zinc finger, RING-type||Zinc finger, RING/FYVE/PHD-type||Zinc finger, RING-type, conserved site||RING-type zinc-finger, LisH dimerisation motif||E3 ubiquitin ligase RBR family	12.7813976065232	205.365431131653	-4.02536	5.75417851435305e-07	0.000206313680224348
TraesCS2D03G0345500	2D:111350173-111352435|+	--	UDP-glucuronosyl/UDP-glucosyltransferase	2.04437902859473	34.3717674859942	-4.02287	0.000230560867986034	0.0246919801978269
TraesCS3B03G0382300	3B:166366749-166367698|-	--	Protein of unknown function DUF1677, plant	2.83970058465058	46.997134482403	-4.02243	9.86135179196441e-05	0.0127452238567075
TraesCS6A03G0239000	6A:74327230-74330601|-	--	PB1 domain||RWP-RK domain||Protein NLP, PB1 domain	3.99117197334718	64.9865628877985	-4.01569	2.61011551630054e-05	0.00447533222444766
TraesCS7A03G0345900	7A:104272153-104273217|-	--	Jacalin-like lectin domain||Jacalin-like lectin domain, plant||Jacalin-like lectin domain superfamily	7.57253489240153	121.491681857174	-4.01416	2.13529433580306e-06	0.000598331005271876
TraesCS1A03G0502500	1A:339220808-339221860|-	--	Glutathione S-transferase, N-terminal||Glutathione S-transferase, C-terminal||Glutathione S-transferase, C-terminal-like||Thioredoxin-like superfamily||Glutathione S-transferase, C-terminal domain superfamily	85.1910175395173	1346.46809284105	-4.01292	8.50266798325072e-08	4.29577975608326e-05
TraesCS1D03G0133900	1D:44672371-44673276|+	--	--	1.89313372310038	31.6934822236107	-4.01047	0.000408153490325432	0.0376483489208895
TraesCS4B03G0669500LC	4B:511652498-511652947|-	--	--	1.89313372310038	31.6934822236107	-4.01047	0.000408153490325432	0.0376483489208895
TraesCS1B03G0574500	1B:355733037-355733467|-	--	Glutathione S-transferase, N-terminal||Thioredoxin-like superfamily	2.83970058465058	46.4837739279624	-4.00662	9.86135179196441e-05	0.0127452238567075
TraesCS4A03G1098300	4A:713946217-713946501|+	--	Late embryogenesis abundant protein, LEA_1 subgroup	2.83970058465058	46.4837739279624	-4.00662	9.86135179196441e-05	0.0127452238567075
TraesCS7D03G0991600	7D:540660621-540661674|-	--	Glycoside hydrolase family 16||Glycoside hydrolase, family 16, active site||Beta-glucanase||Xyloglucan endo-transglycosylase, C-terminal||Concanavalin A-like lectin/glucanase domain superfamily||Xyloglucan endotransglucosylase/hydrolase	86.1375844010674	1355.14506539119	-4.00627	8.85376999957774e-08	4.41463866371469e-05
TraesCS1D03G0304600	1D:143478094-143485822|+	--	Transcription factor, MADS-box||Transcription factor, K-box||MADS MEF2-like||Transcription factor, MADS-box superfamily	6.87812366470113	109.775846021787	-4.00439	4.868459139559e-06	0.00116059889192919
TraesCS6D03G0134500	6D:38573558-38573812|-	--	--	7.57253489240153	120.47943331113	-4.0021	2.28138066801857e-06	0.000630001145963388
TraesCSU03G0469800LC	Un:289358054-289358741|-	--	--	1.89313372310038	31.5056428499801	-4.00192	0.000408153490325432	0.0376483489208895
[truncated: 1,146 more rows]
