# Supplementary material for: Identification and characterization of the powdery mildew resistance gene in spelt accession Lsy-93
Source: Research Square preprint supplement (doi:10.21203/rs.3.rs-6722793/v1), 2025-06-06
Supplement: Supplementary file 5 [file cad705a9e19b6dc8dc6cc46f.xlsx]

## Sheet: KEGG
Table S4 Information about the detailed kyoto encyclopedia of genes and genomes (KEGG) pathway for differentially expressed genes (DEGs).
ID	Description	GeneRatio	BgRatio	pvalue	p.adjust	geneID
taes01100	Metabolic pathways	366|494	8750|17649	1.6065862785781604e-29	1.7511790436501947e-27	TraesCS2D03G0880500/TraesCS1A03G0713100/TraesCS3A03G0864400/TraesCS3B03G0987300/TraesCS4A03G0540500/(TraesCS6A03G0656000,TraesCS6B03G0823100)/TraesCS6D03G0544300/TraesCS2A03G0149000/TraesCS2A03G0802500/(TraesCS2B03G0618700LC,TraesCS4A03G0642100)/TraesCS4B03G0971100/TraesCS5A03G1274800/TraesCS1A03G0672600/TraesCS5B03G1221700/TraesCS5D03G1104000/TraesCS3B03G0248100/(TraesCS3D03G0029500,TraesCSU03G0…
taes01110	Biosynthesis of secondary metabolites	254|494	5209|17649	4.0914341434476186e-25	2.229831608178952e-23	TraesCS2D03G0880500/TraesCS1A03G0713100/TraesCS3A03G0864400/TraesCS3B03G0987300/TraesCS4A03G0540500/(TraesCS6A03G0656000,TraesCS6B03G0823100)/TraesCS6D03G0544300/TraesCS2A03G0149000/TraesCS2A03G0802500/(TraesCS2B03G0618700LC,TraesCS4A03G0642100)/TraesCS4B03G0971100/TraesCS5A03G1274800/(TraesCS3D03G0029500,TraesCSU03G0230800,TraesCSU03G0235500)/(TraesCS3A03G0071400,TraesCS3B03G0108700LC)/TraesCS1B…
taes00592	alpha-Linolenic acid metabolism	26|494	178|17649	4.999283931036185e-12	1.816406494943147e-10	TraesCS4A03G0540500/TraesCS5B03G0014800/(TraesCS4A03G1070000LC,TraesCS4D03G0806500,TraesCS7B03G0394000)/(TraesCS4A03G0185200,TraesCS5D03G0439300)/TraesCS2D03G0055100/TraesCS1B03G0038300/TraesCS4A03G0123000/TraesCS4B03G0647900/TraesCS4B03G0104500LC/TraesCS4B03G0104700/TraesCS1B03G0040200/TraesCS1B03G0040100/TraesCS6A03G0833200LC/TraesCS6B03G0994700/(TraesCS6A03G0833300LC,TraesCS6D03G0707800)/(Trae…
taes04016	MAPK signaling pathway - plant	45|494	511|17649	1.0298931499883579e-11	2.806458833718275e-10	TraesCS1A03G0542400/TraesCS1A03G0646400/TraesCS3A03G0663800/TraesCS3B03G0757500/TraesCS3D03G0606700/TraesCS3D03G0606900/TraesCS5B03G0999600/TraesCS5D03G0905700/TraesCS1B03G0732300LC/TraesCS7A03G1333700/TraesCS7B03G0998600/TraesCS1D03G0604100/TraesCS1D03G0523300/TraesCS1A03G0542500/TraesCS3A03G0663900/(TraesCS4A03G0786000,TraesCS4A03G0812600,TraesCS5D03G1226700LC)/TraesCS5B03G0483900/TraesCS2B03G0…
taes00940	Phenylpropanoid biosynthesis	56|494	898|17649	1.5833914986981352e-08	3.4517934671619344e-07	TraesCS3A03G0313700/TraesCS3B03G0942000/TraesCS2D03G0863200/TraesCS1B03G0108700/(TraesCS1A03G0229900LC,TraesCS1A03G0230000,TraesCS1B03G0334900)/TraesCS6B03G0758700/TraesCS6D03G0526000/TraesCS2A03G0922600/TraesCS6A03G0614100/TraesCS2D03G0229100/TraesCS2B03G0309400/TraesCS2B03G1538800/TraesCS2B03G1539200/TraesCS2B03G1541400/(TraesCS2B03G0308100,TraesCS2B03G0308200)/TraesCS2B03G0898100/TraesCS2D03G0…
taes00480	Glutathione metabolism	37|494	476|17649	2.236557657090294e-08	4.063079743714034e-07	TraesCS2A03G1039900/(TraesCS5B03G1352900,TraesCS6A03G0946800,TraesCS7B03G0656300LC)/TraesCS5B03G0050700/TraesCS1D03G0486000/TraesCS2B03G1436700/TraesCS2D03G0080400/TraesCS1A03G0502500/(TraesCS2A03G1323900,TraesCS2B03G1526200LC,TraesCS2D03G1290200)/TraesCS3A03G1145300/TraesCS3A03G0664700/TraesCS3B03G1166200/TraesCS3B03G1335500/(TraesCS3B03G1165700LC,TraesCS3B03G1165800LC,TraesCS3D03G0946300)/Traes…
taes00196	Photosynthesis - antenna proteins	13|494	92|17649	1.6436744156979474e-06	2.2395063913884532e-05	(TraesCS1A03G0896200LC,TraesCS1A03G0896300LC,TraesCS1A03G0896400LC,TraesCS1A03G0896500LC,TraesCSU03G0209800)/(TraesCS5A03G0783800,TraesCS5B03G0815100,TraesCS5D03G0741600)/TraesCS5A03G1073100/TraesCS5B03G0558600/TraesCS5B03G1135600/TraesCS5B03G1135900/TraesCS5D03G0512700/TraesCS6A03G0215300/(TraesCS6A03G0216700,TraesCS6B03G0305600,TraesCS6D03G0175400)/(TraesCS1B03G0870700LC,TraesCS1B03G0871200,Tra…
taes00380	Tryptophan metabolism	24|494	284|17649	1.6274859791304483e-06	2.2395063913884532e-05	TraesCS2D03G0880500/(TraesCS6A03G0656000,TraesCS6B03G0823100)/TraesCS6D03G0544300/(TraesCS2B03G0618700LC,TraesCS4A03G0642100)/(TraesCS1D03G0939800LC,TraesCS2D03G1328200)/TraesCS2A03G0127000/(TraesCS2D03G1156700,TraesCS6A03G0978400)/(TraesCS7A03G0133400LC,TraesCS7A03G0133600LC,TraesCS7A03G0133700LC,TraesCS7A03G0134200,TraesCS7A03G0134500,TraesCS7A03G0134600LC,TraesCS7A03G0134700,TraesCSU03G0334800…
taes00950	Isoquinoline alkaloid biosynthesis	13|494	101|17649	4.778503426142654e-06	5.787298593883881e-05	TraesCS1D03G0167300/(TraesCS4A03G0037000,TraesCS4D03G0667600)/(TraesCS2B03G1235800,TraesCS2B03G1236300)/TraesCS2B03G1238100/(TraesCS2D03G1156700,TraesCS6A03G0978400)/(TraesCS3A03G0784100,TraesCS3B03G0902600,TraesCS4B03G0985300,TraesCS5A03G1283100)/(TraesCS7A03G0133400LC,TraesCS7A03G0133600LC,TraesCS7A03G0133700LC,TraesCS7A03G0134200,TraesCS7A03G0134500,TraesCS7A03G0134600LC,TraesCS7A03G0134700,Tr…
taes00360	Phenylalanine metabolism	17|494	176|17649	9.466601729385974e-06	9.72547851338076e-05	TraesCS1D03G0167300/(TraesCS4A03G0037000,TraesCS4D03G0667600)/(TraesCS1D03G0939800LC,TraesCS2D03G1328200)/TraesCS2A03G0127000/(TraesCS2D03G1156700,TraesCS6A03G0978400)/(TraesCS7A03G0133400LC,TraesCS7A03G0133600LC,TraesCS7A03G0133700LC,TraesCS7A03G0134200,TraesCS7A03G0134500,TraesCS7A03G0134600LC,TraesCS7A03G0134700,TraesCSU03G0334800LC,TraesCSU03G0334900LC)/TraesCS7D03G0120600/TraesCS2A03G1201000…
taes00520	Amino sugar and nucleotide sugar metabolism	31|494	470|17649	9.814703086898016e-06	9.72547851338076e-05	TraesCS4A03G0474900/TraesCS2B03G0949900/TraesCS1A03G0542400/TraesCS1A03G0646400/TraesCS3A03G0615700/TraesCS3A03G0663800/TraesCS3A03G0742300/TraesCS3B03G0757500/TraesCS3B03G0848000/TraesCS3D03G0606700/TraesCS3D03G0606900/(TraesCS3A03G0345000LC,TraesCS3D03G0684200)/TraesCS4B03G0336700/TraesCS5B03G0999600/TraesCS5D03G0905700/TraesCS6A03G0175800/TraesCS6A03G0593800/TraesCS1B03G0732300LC/TraesCS7A03G1…
taes00910	Nitrogen metabolism	16|494	163|17649	1.4086396787049342e-05	0.00012795143748236485	TraesCS4B03G0101500/TraesCS2D03G0678100/TraesCS3B03G0734900/TraesCS6A03G0842800/TraesCS6B03G0105200/TraesCS6B03G1005400/TraesCS6D03G0074700/TraesCS6D03G0714900/(TraesCS7A03G1309200,TraesCS7B03G1230100LC,TraesCS7D03G1238000)/TraesCS7A03G1308500/TraesCS7A03G1041100/TraesCS7B03G1229300/TraesCS7B03G0882400/TraesCS7D03G1237600/TraesCS7D03G1237700/TraesCS7D03G0994900
taes00350	Tyrosine metabolism	14|494	173|17649	0.00037365279371422025	0.0031329349626807697	TraesCS4A03G0540500/TraesCS1D03G0167300/(TraesCS4A03G0037000,TraesCS4D03G0667600)/(TraesCS2B03G1235800,TraesCS2B03G1236300)/TraesCS2B03G1238100/(TraesCS2D03G1156700,TraesCS6A03G0978400)/(TraesCS3A03G0784100,TraesCS3B03G0902600,TraesCS4B03G0985300,TraesCS5A03G1283100)/(TraesCS7A03G0133400LC,TraesCS7A03G0133600LC,TraesCS7A03G0133700LC,TraesCS7A03G0134200,TraesCS7A03G0134500,TraesCS7A03G0134600LC,Tr…
taes00902	Monoterpenoid biosynthesis	7|494	55|17649	0.0008187743267550452	0.006374742972592852	(TraesCS6A03G0150600,TraesCS7A03G0605500)/TraesCS6A03G0150800/(TraesCS6B03G0213700,TraesCS6B03G0213900)/TraesCS6B03G0214100/TraesCS6D03G0102300/(TraesCS6D03G0134800LC,TraesCSU03G0360100LC)/TraesCS7D03G1274300
taes04626	Plant-pathogen interaction	34|494	750|17649	0.00404262168390633	0.029376384236385996	TraesCS4A03G0012800/TraesCS4A03G0130200/TraesCS4B03G0618400/(TraesCS4B03G0780900,TraesCS4D03G0701000)/TraesCS6B03G0232100/TraesCS6D03G0148200/TraesCS5B03G0483900/TraesCS5A03G0918000/TraesCS5A03G1037300/(TraesCS5A03G1037400,TraesCS5B03G1087800)/(TraesCS5B03G1088800,TraesCS5B03G1088900)/TraesCS5B03G1089500/(TraesCS5B03G1089600,TraesCS5B03G1089800)/(TraesCS5B03G1089700,TraesCS5B03G1089900LC,TraesCS5…
taes00100	Steroid biosynthesis	11|494	157|17649	0.004734914043801826	0.032256601923399936	TraesCS2D03G0041900/TraesCS3B03G0399700/(TraesCS3A03G0200400LC,TraesCS3D03G0180000)/(TraesCS1A03G0080500,TraesCS1B03G0096400)/TraesCS4A03G0581500/TraesCS4B03G0222400/TraesCS5A03G0009700/TraesCS5A03G0009200/TraesCS5A03G0009500/TraesCS5D03G0011500/(TraesCS7A03G0908700,TraesCS7B03G0699000)
taes00965	Betalain biosynthesis	6|494	58|17649	0.00551411160437313	0.03535518616921595	(TraesCS2D03G1156700,TraesCS6A03G0978400)/(TraesCS7A03G0133400LC,TraesCS7A03G0133600LC,TraesCS7A03G0133700LC,TraesCS7A03G0134200,TraesCS7A03G0134500,TraesCS7A03G0134600LC,TraesCS7A03G0134700,TraesCSU03G0334800LC,TraesCSU03G0334900LC)/TraesCS7D03G0120600/TraesCS2A03G1201000/TraesCS2A03G1201200/TraesCS2A03G1201300
taes00941	Flavonoid biosynthesis	12|494	197|17649	0.009686566349237887	0.058657540670384985	TraesCS3A03G0313700/TraesCS3B03G0942000/(TraesCS6A03G0701100,TraesCS6B03G0832500,TraesCS6D03G0589300)/(TraesCS2A03G1126400,TraesCS2B03G1277300,TraesCS2D03G1076300)/(TraesCS2B03G1278300,TraesCS2D03G1115300)/(TraesCS2B03G1278200,TraesCS2D03G1077100,TraesCS2D03G1077200)/TraesCS1A03G1079300/TraesCS1B03G1273800/(TraesCS5B03G1189000,TraesCS7D03G0499700LC)/(TraesCS5D03G1074300,TraesCS5D03G1074400)/Traes…
taes00630	Glyoxylate and dicarboxylate metabolism	13|494	240|17649	0.017990657619988384	0.10320956213572283	TraesCS4B03G0101500/TraesCS2B03G1235700/TraesCS2D03G0788500/(TraesCS2A03G0132200,TraesCS2B03G0179300,TraesCS2D03G0129200,TraesCS2D03G0129300)/TraesCS2D03G0128700/TraesCS2D03G0128800/TraesCS2D03G0128900/TraesCS2D03G0129100/TraesCS2D03G1044500/(TraesCS5B03G0451700,TraesCS6B03G0727700LC)/TraesCS6B03G0866600/(TraesCS2A03G0131600,TraesCS2A03G0131800)/TraesCS2A03G1100400
taes00903	Limonene and pinene degradation	3|494	24|17649	0.028515561172450944	0.15540980838985763	TraesCS2D03G0880500/(TraesCS6A03G0656000,TraesCS6B03G0823100)/TraesCS6D03G0544300
taes00195	Photosynthesis	12|494	234|17649	0.03244231863073852	0.1683910824166904	TraesCS2B03G0697700/(TraesCS1A03G0934200LC,TraesCS4B03G0425400,TraesCSU03G0199700LC)/TraesCS2D03G0742900/(TraesCS1D03G0160800LC,TraesCS1D03G0463100LC,TraesCS3D03G0459300LC,TraesCS3D03G1158500,TraesCS4B03G0424200LC,TraesCS4D03G0347300LC,TraesCS5A03G1142200LC,TraesCS5D03G0021400,TraesCS5D03G1011700LC,TraesCS7D03G1258000LC)/TraesCS5D03G1010900LC/(TraesCS2D03G0615200LC,TraesCS6A03G0951000)/TraesCS6B0…
taes00945	Stilbenoid, diarylheptanoid and gingerol biosynthesis	8|494	136|17649	0.03753773706465107	0.17048388916862361	TraesCS3A03G0313700/TraesCS3B03G0942000/(TraesCS6A03G0701100,TraesCS6B03G0832500,TraesCS6D03G0589300)/(TraesCS4A03G1085400,TraesCS4A03G1086100)/(TraesCS6A03G0592900,TraesCS6B03G0720100,TraesCS6D03G0491300)/TraesCS6A03G0034200/TraesCS6D03G0039100/TraesCSU03G0172300LC
taes00053	Ascorbate and aldarate metabolism	12|494	239|17649	0.03721945281758065	0.17048388916862361	TraesCS2D03G0880500/TraesCS1A03G0713100/TraesCS3A03G0864400/TraesCS3B03G0987300/(TraesCS6A03G0656000,TraesCS6B03G0823100)/TraesCS6D03G0544300/(TraesCS5A03G0245700,TraesCS5B03G0261800)/TraesCS5B03G0829800/TraesCS5D03G0257500/(TraesCS7A03G0783600,TraesCS7B03G0621500LC)/(TraesCS7B03G0621600,TraesCS7D03G0748200)/TraesCS2A03G1039900
taes00904	Diterpenoid biosynthesis	8|494	136|17649	0.03753773706465107	0.17048388916862361	TraesCS2B03G1133600/TraesCS2B03G0084100/(TraesCS2B03G1133200,TraesCS2B03G1133500)/TraesCS2B03G1133800/TraesCS2D03G0056100/TraesCS3A03G0950800/TraesCS3D03G0884400/TraesCS2A03G0055700
taes00908	Zeatin biosynthesis	7|494	115|17649	0.04280080830260854	0.1866115241993732	TraesCS3A03G0238600/TraesCS3B03G0876900/(TraesCS3B03G0385400LC,TraesCS3D03G0303800)/TraesCS3D03G0705800/(TraesCS7A03G0801100,TraesCS7B03G0638400)/TraesCS7A03G1134800/TraesCS7B03G0993300
taes00052	Galactose metabolism	10|494	193|17649	0.04544989133975536	0.18954361067742714	TraesCS2A03G0802500/TraesCS3B03G0248100/(TraesCS3D03G0029500,TraesCSU03G0230800,TraesCSU03G0235500)/TraesCS3D03G0183600/TraesCS4A03G0261700/TraesCS4D03G0450000/TraesCS7A03G0315500/TraesCS7B03G0094300/TraesCS7D03G0298200/(TraesCS2A03G0193100LC,TraesCS2A03G0194000)
taes04075	Plant hormone signal transduction	35|494	931|17649	0.04695116961734434	0.18954361067742714	(TraesCS4A03G0786000,TraesCS4A03G0812600,TraesCS5D03G1226700LC)/TraesCS5B03G0483900/TraesCS2B03G0000400/TraesCS2D03G0000400/TraesCS3B03G0953200/TraesCS3D03G0560900/(TraesCS4B03G0581000,TraesCS4D03G0498700LC)/(TraesCS4D03G0515700,TraesCS5A03G0143100LC)/TraesCS5A03G1037300/(TraesCS5A03G1037400,TraesCS5B03G1087800)/TraesCS5B03G0484700/(TraesCS5B03G1088800,TraesCS5B03G1088900)/TraesCS5B03G1089500/(Tr…
taes00250	Alanine, aspartate and glutamate metabolism	9|494	174|17649	0.056370922983985154	0.21944395018765647	TraesCS4B03G0101500/(TraesCS5A03G0733200LC,TraesCS5B03G0768600LC,TraesCS5D03G0696100,TraesCS5A03G0733500LC,TraesCS5B03G0768700LC)/TraesCS2B03G1350700/TraesCS3D03G1158300/TraesCS4A03G0227300/TraesCS5A03G0421300/TraesCS5D03G0389800/(TraesCS1B03G1083600LC,TraesCS7A03G0909300,TraesCS7B03G0698800)/TraesCS5B03G0418800
taes00960	Tropane, piperidine and pyridine alkaloid biosynthesis	7|494	127|17649	0.06611132029390661	0.24848737627709724	TraesCS1D03G0167300/(TraesCS4A03G0037000,TraesCS4D03G0667600)/(TraesCS5D03G1074300,TraesCS5D03G1074400)/TraesCS2D03G1109300/(TraesCS3B03G1073600,TraesCS3B03G1073800LC)/TraesCS3D03G0874800/TraesCS4D03G0726500
taes00905	Brassinosteroid biosynthesis	4|494	56|17649	0.07134761980787278	0.25922968530193774	TraesCS5A03G0546100/TraesCS5B03G0555700/TraesCS5B03G0555800/TraesCS5D03G0509300
taes00130	Ubiquinone and other terpenoid-quinone biosynthesis	8|494	171|17649	0.10798956396978478	0.3607113340400843	TraesCS2B03G0351900/TraesCS2D03G0610400/TraesCS3A03G0313700/TraesCS3B03G0942000/TraesCS4A03G0760000/(TraesCS6B03G0592300,TraesCS6B03G0592400,TraesCS6B03G0592900)/TraesCS1D03G0167300/TraesCS2A03G0256400
taes00402	Benzoxazinoid biosynthesis	3|494	42|17649	0.11251546199415476	0.3607113340400843	TraesCS5B03G1092400/(TraesCS7D03G0261300,TraesCS7D03G0261400)/(TraesCS2A03G1091200LC,TraesCS2B03G1223800)
taes00920	Sulfur metabolism	6|494	117|17649	0.11050563979841072	0.3607113340400843	TraesCS5D03G0877500/TraesCS4A03G0083200/TraesCS4B03G0701200/TraesCS2B03G0603800/(TraesCS3A03G0980000,TraesCS4B03G0406400LC)/TraesCS3D03G0915600
taes00561	Glycerolipid metabolism	12|494	287|17649	0.10946727527569224	0.3607113340400843	TraesCS2D03G0880500/TraesCS1A03G0713100/TraesCS3A03G0864400/TraesCS3B03G0987300/(TraesCS6A03G0656000,TraesCS6B03G0823100)/TraesCS6D03G0544300/TraesCS3B03G0701900/TraesCS3D03G0571200/TraesCS3D03G0748200/(TraesCS5B03G0233000,TraesCS5D03G0235800)/TraesCS7A03G0814900/TraesCS7B03G0672200
taes00330	Arginine and proline metabolism	8|494	179|17649	0.13038884885572455	0.40606812929354213	TraesCS2D03G0880500/(TraesCS6A03G0656000,TraesCS6B03G0823100)/TraesCS6D03G0544300/TraesCS2B03G1234100/(TraesCS1D03G0939800LC,TraesCS2D03G1328200)/(TraesCS3A03G0864700,TraesCS4B03G0180100LC,TraesCS4B03G0412500LC,TraesCS7B03G0701400LC)/(TraesCS3B03G0987700,TraesCS3D03G0793300)/TraesCS2A03G0127000
taes00944	Flavone and flavonol biosynthesis	3|494	48|17649	0.1505756711970381	0.45590967112436537	TraesCS1A03G1079300/TraesCS1B03G1273800/(TraesCS2B03G1005600,TraesCS2D03G0857200)
taes00410	beta-Alanine metabolism	6|494	130|17649	0.1578093280775975	0.4648977502826521	TraesCS2D03G0880500/(TraesCS6A03G0656000,TraesCS6B03G0823100)/TraesCS6D03G0544300/TraesCS3D03G1158300/(TraesCS4A03G0037000,TraesCS4D03G0667600)/TraesCS2B03G1234100
taes00340	Histidine metabolism	3|494	54|17649	0.19205599028051717	0.5508974458046414	TraesCS2D03G0880500/(TraesCS6A03G0656000,TraesCS6B03G0823100)/TraesCS6D03G0544300
taes00591	Linoleic acid metabolism	3|494	56|17649	0.20647046738084174	0.5770584857567115	TraesCS2D03G1177900/TraesCS5B03G0014800/(TraesCS4A03G1070000LC,TraesCS4D03G0806500,TraesCS7B03G0394000)
taes00906	Carotenoid biosynthesis	4|494	87|17649	0.2266246138616759	0.6175520727730668	TraesCS4D03G0736300/(TraesCS3A03G0541400,TraesCS3B03G0624200,TraesCS3D03G0502500)/(TraesCS5A03G0075200LC,TraesCS5B03G0068800)/(TraesCS5A03G0075100LC,TraesCS5D03G0099600)
taes00909	Sesquiterpenoid and triterpenoid biosynthesis	2|494	33|17649	0.2357289856454665	0.6266941325696548	TraesCS2B03G1134500/TraesCS2D03G0956000
taes00564	Glycerophospholipid metabolism	12|494	339|17649	0.24288770734003462	0.6303514309538993	TraesCS3B03G0701900/TraesCS3D03G0571200/TraesCS3D03G0748200/(TraesCS5B03G0233000,TraesCS5D03G0235800)/TraesCS7A03G0814900/TraesCS7B03G0672200/TraesCS2B03G1239500/(TraesCS3A03G0743500,TraesCS3A03G0743600LC)/TraesCS3A03G1207400/(TraesCS3D03G0685300,TraesCS3D03G0685400LC)/(TraesCS3A03G1205100,TraesCS3B03G1452000,TraesCS3D03G1150200)/TraesCS7A03G1326400
taes00062	Fatty acid elongation	8|494	216|17649	0.25961015525608755	0.6580815563468265	TraesCS4A03G0012800/TraesCS4A03G0130200/TraesCS4B03G0929000/TraesCS4B03G0618400/(TraesCS4B03G0780900,TraesCS4D03G0701000)/TraesCS4D03G0814000/TraesCS6B03G0232100/TraesCS6D03G0148200
taes00310	Lysine degradation	5|494	126|17649	0.27797740275732674	0.6886258386488321	TraesCS2D03G0880500/(TraesCS6A03G0656000,TraesCS6B03G0823100)/TraesCS6D03G0544300/(TraesCS2B03G0618700LC,TraesCS4A03G0642100)/(TraesCS1B03G0874100,TraesCS1D03G0731700)
taes00780	Biotin metabolism	3|494	67|17649	0.2890492897726364	0.6916058041409527	(TraesCS3A03G0071400,TraesCS3B03G0108700LC)/TraesCS1B03G0972200/(TraesCS1A03G0845700,TraesCS1D03G0813800)
taes00460	Cyanoamino acid metabolism	10|494	289|17649	0.29187033936223694	0.6916058041409527	TraesCS2B03G1350700/TraesCS3D03G0006400/TraesCS5A03G0931300/TraesCS5A03G0705200/TraesCS5D03G0888800/TraesCS5D03G0889900/TraesCS5D03G0890100/TraesCS1D03G0570700/TraesCSU03G0305100/(TraesCS2A03G0931100,TraesCS2B03G1022100)
taes00450	Selenocompound metabolism	3|494	71|17649	0.31979800740688424	0.726207975153133	TraesCS5D03G0877500/TraesCS1A03G0487700/TraesCS1D03G0473800
taes00071	Fatty acid degradation	6|494	165|17649	0.31612217488717176	0.726207975153133	TraesCS2D03G0880500/TraesCS4A03G0540500/(TraesCS6A03G0656000,TraesCS6B03G0823100)/TraesCS6D03G0544300/TraesCS1A03G0032000/TraesCS1A03G0032100
taes00770	Pantothenate and CoA biosynthesis	4|494	114|17649	0.3961639182161592	0.8304205208761798	TraesCS2D03G0880500/(TraesCS6A03G0656000,TraesCS6B03G0823100)/TraesCS6D03G0544300/TraesCS2B03G1234100
taes00999	Biosynthesis of various plant secondary metabolites	8|494	246|17649	0.38383860773174716	0.8304205208761798	TraesCS3D03G0006400/TraesCS5A03G0931300/TraesCS5D03G0888800/TraesCS5D03G0889900/TraesCS5D03G0890100/TraesCS1D03G0570700/(TraesCS2A03G0931100,TraesCS2B03G1022100)/TraesCS2B03G0000700
taes00300	Lysine biosynthesis	2|494	47|17649	0.3803834169686995	0.8304205208761798	TraesCS4B03G0703600/TraesCS4D03G0629500
taes00430	Taurine and hypotaurine metabolism	3|494	80|17649	0.3888100719593106	0.8304205208761798	TraesCS3D03G1158300/TraesCS5A03G0836000/(TraesCS1D03G0014500LC,TraesCS5A03G0486900,TraesCS5D03G0450700)
taes00230	Purine metabolism	8|494	264|17649	0.4603264587938845	0.9467091322364795	TraesCS4B03G0971100/TraesCS5A03G1274800/(TraesCS3A03G0090000,TraesCS3B03G0089000LC,TraesCS3D03G0065800LC)/TraesCS4B03G0939500/TraesCS4D03G0824900/TraesCS5A03G1242500/TraesCS5D03G0877500/(TraesCS5B03G1352900,TraesCS6A03G0946800,TraesCS7B03G0656300LC)
taes01240	Biosynthesis of cofactors	24|494	837|17649	0.4815725780592877	0.953375934134519	TraesCS2D03G0880500/TraesCS1A03G0713100/TraesCS3A03G0864400/TraesCS3B03G0987300/(TraesCS6A03G0656000,TraesCS6B03G0823100)/TraesCS6D03G0544300/(TraesCS5A03G0245700,TraesCS5B03G0261800)/TraesCS5B03G0829800/TraesCS5D03G0257500/(TraesCS7A03G0783600,TraesCS7B03G0621500LC)/(TraesCS7B03G0621600,TraesCS7D03G0748200)/(TraesCS3A03G0071400,TraesCS3B03G0108700LC)/TraesCS1B03G0972200/(TraesCS1A03G0845700,Trae…
taes00860	Porphyrin metabolism	5|494	162|17649	0.4762972123614047	0.953375934134519	TraesCS2B03G1413300/TraesCS1B03G0190500/TraesCS5B03G0127200/TraesCS1D03G0127000/TraesCS2A03G0274100
taes00240	Pyrimidine metabolism	6|494	200|17649	0.489807819371863	0.953375934134519	(TraesCS3A03G0090000,TraesCS3B03G0089000LC,TraesCS3D03G0065800LC)/TraesCS4B03G0939500/TraesCS4D03G0824900/TraesCS5A03G1242500/(TraesCS5B03G1352900,TraesCS6A03G0946800,TraesCS7B03G0656300LC)/TraesCS1B03G0187500
taes04146	Peroxisome	4|494	278|17649	0.9543067147498667	0.9999999999666691	TraesCSU03G0103400/(TraesCS1B03G0874100,TraesCS1D03G0731700)/TraesCS2D03G1044500/TraesCS2A03G1100400
taes04145	Phagosome	1|494	268|17649	0.9995321454833753	0.9999999999666691	TraesCS2B03G1568400
taes04144	Endocytosis	1|494	468|17649	0.9999985842066174	0.9999999999666691	TraesCS7A03G1326400
taes04141	Protein processing in endoplasmic reticulum	6|494	824|17649	0.9999962363682008	0.9999999999666691	TraesCS2B03G0597600/TraesCS5A03G0125600/TraesCS5B03G0137600/TraesCS5D03G0148700/(TraesCS7B03G0222700,TraesCS7B03G0355800)/TraesCS7D03G0404300
taes04070	Phosphatidylinositol signaling system	3|494	203|17649	0.9262284359146975	0.9999999999666691	TraesCS2B03G1239500/TraesCS2B03G1568400/TraesCS5A03G0918000
taes03440	Homologous recombination	2|494	237|17649	0.9909497818267555	0.9999999999666691	(TraesCS6A03G0444500LC,TraesCS6A03G0444600LC,TraesCS7D03G0487100LC,TraesCS6A03G0444700LC)/TraesCS5A03G0848800
taes03430	Mismatch repair	1|494	163|17649	0.9904303369117226	0.9999999999666691	(TraesCS6A03G0444500LC,TraesCS6A03G0444600LC,TraesCS7D03G0487100LC,TraesCS6A03G0444700LC)
taes03420	Nucleotide excision repair	1|494	223|17649	0.9982905469986799	0.9999999999666691	(TraesCS6A03G0444500LC,TraesCS6A03G0444600LC,TraesCS7D03G0487100LC,TraesCS6A03G0444700LC)
taes03060	Protein export	1|494	228|17649	0.998519519664892	0.9999999999666691	TraesCS4D03G0230100
taes01250	Biosynthesis of nucleotide sugars	4|494	259|17649	0.9344160242244041	0.9999999999666691	TraesCS3A03G0742300/TraesCS3B03G0848000/(TraesCS3A03G0345000LC,TraesCS3D03G0684200)/TraesCS2A03G0228900LC
taes02010	ABC transporters	2|494	97|17649	0.7592619873883071	0.9999999999666691	TraesCS3B03G0747500/TraesCS3D03G0601600
taes03022	Basal transcription factors	1|494	189|17649	0.9954598896955381	0.9999999999666691	TraesCS4B03G0609300
taes03020	RNA polymerase	2|494	173|17649	0.9566608136138436	0.9999999999666691	(TraesCS1A03G0380500LC,TraesCS1A03G0575300LC,TraesCS1A03G0933000LC,TraesCS1B03G0684000LC,TraesCS1B03G0837700LC,TraesCS1B03G1089200LC,TraesCS1B03G1234300LC,TraesCS1D03G0158700LC,TraesCS1D03G0166400LC,TraesCS1D03G0435900LC,TraesCS1D03G0464700LC,TraesCS1D03G0857200LC,TraesCS2D03G0732000LC,TraesCS2D03G0732300LC,TraesCS3D03G1129600LC,TraesCS4A03G0385700LC,TraesCS4A03G0385900LC,TraesCS4B03G0701100LC,Tr…
taes03018	RNA degradation	2|494	372|17649	0.9997238170059758	0.9999999999666691	TraesCS2B03G0036800/TraesCS2D03G0714700
taes03015	mRNA surveillance pathway	2|494	388|17649	0.9998194088160305	0.9999999999666691	TraesCS1B03G0703000/TraesCS1D03G0579100
taes03010	Ribosome	3|494	1039|17649	0.9999999999666691	0.9999999999666691	(TraesCS1D03G0469400LC,TraesCS1D03G0469500LC,TraesCS1D03G0469600LC,TraesCS1D03G1000100,TraesCS2A03G0180400LC,TraesCS2A03G0780400LC,TraesCS2B03G0861300LC,TraesCS3B03G0447800LC,TraesCS5D03G0017700LC,TraesCS5D03G0846800,TraesCS7A03G0704600LC,TraesCS7D03G0580400LC,TraesCSU03G0534400LC)/TraesCS2D03G1330600/TraesCS4D03G0431300
taes01200	Carbon metabolism	17|494	798|17649	0.9043502416278176	0.9999999999666691	(TraesCS2B03G0618700LC,TraesCS4A03G0642100)/TraesCS4B03G0971100/TraesCS5A03G1274800/TraesCS2B03G1235700/TraesCS4A03G0083200/TraesCS4B03G0701200/TraesCS2D03G0788500/(TraesCS2A03G0132200,TraesCS2B03G0179300,TraesCS2D03G0129200,TraesCS2D03G0129300)/TraesCS2D03G0128700/TraesCS2D03G0128800/TraesCS2D03G0128900/TraesCS2D03G0129100/TraesCS2D03G1044500/(TraesCS5B03G0451700,TraesCS6B03G0727700LC)/TraesCS6B…
taes01212	Fatty acid metabolism	6|494	277|17649	0.7911868648696432	0.9999999999666691	(TraesCS3A03G0071400,TraesCS3B03G0108700LC)/TraesCS1B03G0972200/(TraesCS1A03G0845700,TraesCS1D03G0813800)/TraesCS4B03G0929000/TraesCS4D03G0814000/(TraesCS1D03G0245300,TraesCS2A03G0580900LC,TraesCS6A03G0747000LC,TraesCS6B03G0885300,TraesCS6D03G0628800)
taes03008	Ribosome biogenesis in eukaryotes	2|494	282|17649	0.9971083506756694	0.9999999999666691	(TraesCS2B03G1444900,TraesCS4A03G0973700LC)/(TraesCS5A03G0986300LC,TraesCS7A03G1297500LC,TraesCS6A03G0152700LC)
taes01230	Biosynthesis of amino acids	15|494	704|17649	0.8914143188250047	0.9999999999666691	TraesCS4B03G0971100/TraesCS5A03G1274800/TraesCS4B03G0101500/(TraesCS5A03G0733200LC,TraesCS5B03G0768600LC,TraesCS5D03G0696100,TraesCS5A03G0733500LC,TraesCS5B03G0768700LC)/TraesCS4A03G0227300/TraesCS5A03G0421300/TraesCS5D03G0389800/TraesCS5B03G0418800/TraesCS4A03G0083200/TraesCS4B03G0701200/TraesCS4B03G0703600/TraesCS4D03G0629500/(TraesCS3A03G0864700,TraesCS4B03G0180100LC,TraesCS4B03G0412500LC,Trae…
taes01232	Nucleotide metabolism	6|494	247|17649	0.6934359084928353	0.9999999999666691	(TraesCS3A03G0090000,TraesCS3B03G0089000LC,TraesCS3D03G0065800LC)/TraesCS4B03G0939500/TraesCS4D03G0824900/TraesCS5A03G1242500/(TraesCS5B03G1352900,TraesCS6A03G0946800,TraesCS7B03G0656300LC)/TraesCS1B03G0187500
taes03030	DNA replication	2|494	203|17649	0.9789958884929562	0.9999999999666691	(TraesCS5A03G0223500,TraesCS5D03G0238000,TraesCS7A03G0416800LC)/(TraesCS6A03G0444500LC,TraesCS6A03G0444600LC,TraesCS7D03G0487100LC,TraesCS6A03G0444700LC)
taes00010	Glycolysis / Gluconeogenesis	9|494	449|17649	0.8853403221635316	0.9999999999666691	TraesCS2D03G0880500/TraesCS1A03G0713100/TraesCS3A03G0864400/TraesCS3B03G0987300/TraesCS4A03G0540500/(TraesCS6A03G0656000,TraesCS6B03G0823100)/TraesCS6D03G0544300/TraesCS2A03G0149000/TraesCS2A03G0802500
taes00740	Riboflavin metabolism	1|494	61|17649	0.8235555401566028	0.9999999999666691	TraesCS2B03G1090300
taes00970	Aminoacyl-tRNA biosynthesis	2|494	226|17649	0.9880907933590273	0.9999999999666691	TraesCS2B03G1040300LC/(TraesCS4B03G0806000,TraesCS4B03G0806100,TraesCS4B03G1018200,TraesCS5A03G1302800LC)
taes00020	Citrate cycle (TCA cycle)	1|494	163|17649	0.9904303369117226	0.9999999999666691	(TraesCS2B03G0618700LC,TraesCS4A03G0642100)
taes00030	Pentose phosphate pathway	2|494	158|17649	0.9382453038717998	0.9999999999666691	TraesCS4B03G0971100/TraesCS5A03G1274800
taes00040	Pentose and glucuronate interconversions	4|494	233|17649	0.8945728528971744	0.9999999999666691	TraesCS1A03G0713100/TraesCS3A03G0864400/TraesCS3B03G0987300/TraesCS1A03G0672600
taes00051	Fructose and mannose metabolism	2|494	193|17649	0.9732021851857703	0.9999999999666691	TraesCS5B03G1221700/TraesCS5D03G1104000
taes00061	Fatty acid biosynthesis	3|494	149|17649	0.791186646735969	0.9999999999666691	(TraesCS3A03G0071400,TraesCS3B03G0108700LC)/TraesCS1B03G0972200/(TraesCS1A03G0845700,TraesCS1D03G0813800)
taes00073	Cutin, suberine and wax biosynthesis	2|494	144|17649	0.9145543089477989	0.9999999999666691	TraesCS1A03G0405200/TraesCSU03G0103400
taes00190	Oxidative phosphorylation	4|494	514|17649	0.9997351892415324	0.9999999999666691	(TraesCS1A03G0928600LC,TraesCS1A03G0936200LC,TraesCS1A03G0936300LC,TraesCS1B03G1093400LC,TraesCS1D03G0163700LC,TraesCS1D03G0194000LC,TraesCS1D03G0338700LC,TraesCS1D03G0338800,TraesCS2A03G0241200LC,TraesCS2B03G0565200LC,TraesCS2B03G0847000LC,TraesCS2B03G0863100LC,TraesCS2D03G0872600LC,TraesCS3A03G0825600LC,TraesCS3A03G1001800LC,TraesCS3B03G0023500LC,TraesCS3B03G0023600LC,TraesCS3B03G0451500LC,Trae…
taes00220	Arginine biosynthesis	2|494	101|17649	0.7786738883508326	0.9999999999666691	TraesCS4B03G0101500/(TraesCS5A03G0733200LC,TraesCS5B03G0768600LC,TraesCS5D03G0696100,TraesCS5A03G0733500LC,TraesCS5B03G0768700LC)
taes00260	Glycine, serine and threonine metabolism	3|494	216|17649	0.9435459238327019	0.9999999999666691	TraesCS2B03G1235700/(TraesCS4A03G0037000,TraesCS4D03G0667600)/(TraesCS1B03G0874100,TraesCS1D03G0731700)
taes00261	Monobactam biosynthesis	1|494	35|17649	0.6301296651437174	0.9999999999666691	TraesCS5D03G0877500
taes00270	Cysteine and methionine metabolism	8|494	406|17649	0.8850857989165752	0.9999999999666691	TraesCS2A03G0149000/TraesCS1D03G0167300/TraesCS2B03G1299600/TraesCS1A03G0487700/TraesCS4A03G0083200/TraesCS4B03G0701200/TraesCS5B03G0609400/TraesCS1D03G0473800
taes00280	Valine, leucine and isoleucine degradation	3|494	137|17649	0.7419144883540595	0.9999999999666691	TraesCS2D03G0880500/(TraesCS6A03G0656000,TraesCS6B03G0823100)/TraesCS6D03G0544300
taes01040	Biosynthesis of unsaturated fatty acids	1|494	129|17649	0.974670260107511	0.9999999999666691	(TraesCS1D03G0245300,TraesCS2A03G0580900LC,TraesCS6A03G0747000LC,TraesCS6B03G0885300,TraesCS6D03G0628800)
taes00400	Phenylalanine, tyrosine and tryptophan biosynthesis	2|494	143|17649	0.9125700118042357	0.9999999999666691	TraesCS1D03G0167300/TraesCS5D03G0421900
taes00562	Inositol phosphate metabolism	2|494	190|17649	0.9711820008818848	0.9999999999666691	TraesCS2B03G1239500/TraesCS2B03G1568400
taes00565	Ether lipid metabolism	1|494	86|17649	0.9134883065386386	0.9999999999666691	TraesCS7A03G1326400
taes00600	Sphingolipid metabolism	1|494	125|17649	0.9716005826386431	0.9999999999666691	TraesCS6D03G0051600
taes00620	Pyruvate metabolism	9|494	337|17649	0.6040937508204444	0.9999999999666691	TraesCS2D03G0880500/TraesCS1A03G0713100/TraesCS3A03G0864400/TraesCS3B03G0987300/TraesCS4A03G0540500/(TraesCS6A03G0656000,TraesCS6B03G0823100)/TraesCS6D03G0544300/TraesCS2A03G0149000/TraesCS2D03G0788500
taes00640	Propanoate metabolism	1|494	87|17649	0.9159216480275592	0.9999999999666691	TraesCS2A03G0149000
taes00650	Butanoate metabolism	2|494	82|17649	0.672974500332642	0.9999999999666691	TraesCS3D03G1158300/(TraesCS1B03G1083600LC,TraesCS7A03G0909300,TraesCS7B03G0698800)
taes00670	One carbon pool by folate	1|494	47|17649	0.7371235123098046	0.9999999999666691	TraesCS2B03G1235700
taes00710	Carbon fixation in photosynthetic organisms	6|494	234|17649	0.6427897515433746	0.9999999999666691	(TraesCS2A03G0132200,TraesCS2B03G0179300,TraesCS2D03G0129200,TraesCS2D03G0129300)/TraesCS2D03G0128700/TraesCS2D03G0128800/TraesCS2D03G0128900/TraesCS2D03G0129100/(TraesCS2A03G0131600,TraesCS2A03G0131800)
taes00730	Thiamine metabolism	2|494	68|17649	0.5713240618940123	0.9999999999666691	(TraesCS2A03G1350900,TraesCS2D03G1324000)/TraesCS2B03G1552000
taes00750	Vitamin B6 metabolism	1|494	46|17649	0.729533297515313	0.9999999999666691	TraesCS4A03G0487500
taes00760	Nicotinate and nicotinamide metabolism	1|494	59|17649	0.8132109554536507	0.9999999999666691	TraesCS1B03G0187500
taes00900	Terpenoid backbone biosynthesis	5|494	188|17649	0.6083262183762845	0.9999999999666691	(TraesCS2A03G1350900,TraesCS2D03G1324000)/TraesCS2B03G1552000/TraesCS2B03G1134500/TraesCS2D03G0956000/TraesCS5D03G0057900LC
taes00500	Starch and sucrose metabolism	11|494	553|17649	0.9097005740161026	0.9999999999666691	(TraesCS3D03G0029500,TraesCSU03G0230800,TraesCSU03G0235500)/TraesCS3D03G0006400/TraesCS5A03G0931300/TraesCS5D03G0888800/TraesCS5D03G0889900/TraesCS5D03G0890100/TraesCS1D03G0570700/(TraesCS2A03G0931100,TraesCS2B03G1022100)/TraesCS2B03G1238800/TraesCS4D03G0788100/TraesCS5A03G1203000
taes04712	Circadian rhythm - plant	4|494	163|17649	0.672979424673364	0.9999999999666691	(TraesCS5D03G1074300,TraesCS5D03G1074400)/TraesCS3A03G0331600/(TraesCS3B03G0387400,TraesCS3D03G0308000)/TraesCS5A03G0723700
